# Supplementary material for: A systems view on DNA damage response kinetics in Tetrahymena
Source: HighWire-hosted journal article supplement (doi:10.1101/gr.281000.125), 2026-01-28
Supplement: Supplemental_Table_S2.xlsx [file Supplemental_Table_S2.xlsx]

## Sheet: Supplemental_Table_S2
Human Gene	Yeast Gene	Yeast Standard	Tetrahymena Standard	TTHERM	Repair Pathway
MSH6	MSH6	YDR097C	MSH3	TTHERM_00426230	MMR
XPG	EXO1	YOR033C	NA	TTHERM_00773520	DSBR
XPG	EXO1	YOR033C	NA	TTHERM_00773520	MMR
XPG	EXO1	YOR033C	NA	TTHERM_00773520	NER
down stream mediators	RAD53	YPL153C	NA	TTHERM_00000020	DDR
ERCC1	RAD10	YML095C	RAD10	TTHERM_00011650	NER
RAD23	RAD23	YEL037C	RAD23	TTHERM_00013290	NER
Mec1/ATR	DNA2	YHR164C	NA	TTHERM_000136019	DDR
XPF1	RAD1	YPL022W	XPF1	TTHERM_000160559	NER
DSIF	SPT5	YML010W	SPT5	TTHERM_00028580	NER
KU80	YKU80	YMR106C	TPB1	TTHERM_000309879	DSBR
NA	RAD5	YLR032W	RAD5	TTHERM_00037210	ICL
NA	SNM1/PSO2	YMR137C	SNM1	TTHERM_000697499	ICL
down stream mediators	RAD53	YPL153C	NA	TTHERM_00075550	DDR
down stream mediators	RAD53	YPL153C	NA	TTHERM_00079490	DDR
down stream mediators	RAD53	YPL153C	NA	TTHERM_000841299	DDR
down stream mediators	RAD53	YPL153C	NA	TTHERM_00106700	DDR
RPA1	RFA1	YAR007C	RFA1	TTHERM_00106890	DSBR
RPA1	RFA1	YAR007C	RFA1	TTHERM_00106890	NER
down stream mediators	RAD53	YPL153C	NA	TTHERM_00106920	DDR
NA	APN2	YBL019W	NA	TTHERM_001080610	BER
POL Epsilon	POL2	YNL262W	POL2	TTHERM_00112520	BER
POL Epsilon	POL2	YNL262W	POL2	TTHERM_00112520	NER
down stream mediators	CHK1	YBR274W	NA	TTHERM_00112569	DDR
MLH1	MLH1	YMR167W	TMLH1	TTHERM_00127000	MMR
down stream mediators	RAD53	YPL153C	NA	TTHERM_00128720	DDR
down stream mediators	RAD53	YPL153C	NA	TTHERM_00128740	DDR
down stream mediators	CHK1	YBR274W	NA	TTHERM_001358411	DDR
Mec1/ATR	DNA2	YHR164C	DNA2	TTHERM_00136030	DDR
down stream mediators	RAD53	YPL153C	NA	TTHERM_001388156	DDR
MSH6	MSH6	YDR097C	NA	TTHERM_00142230	MMR
RAD51	RAD51	YER095W	RAD51	TTHERM_00142330	DSBR
down stream mediators	CHK1	YBR274W	NA	TTHERM_00145520	DDR
MSH6	MSH6	YDR097C	MSH6L3	TTHERM_00150000	MMR
down stream mediators	RAD53	YPL153C	NA	TTHERM_00151959	DDR
down stream mediators	RAD53	YPL153C	NA	TTHERM_00151970	DDR
down stream mediators	RAD53	YPL153C	NA	TTHERM_00151980	DDR
RFC	RFC5	YBR087W	RFC5	TTHERM_00161180	BER
clamp loader	RFC5	YBR087W	RFC5	TTHERM_00161180	DDR
RFC	RFC5	YBR087W	RFC5	TTHERM_00161180	MMR
RFC	RFC5	YBR087W	RFC5	TTHERM_00161180	NER
MSH6	MSH6	YDR097C	MSH6	TTHERM_00194810	MMR
DNAPKCs	NA	NA	DPK1	TTHERM_00203010	DSBR
down stream mediators	RAD53	YPL153C	NA	TTHERM_00213560	DDR
RFC	RFC3	YNL290W	RFC3	TTHERM_00213600	BER
clamp loader	RFC3	YNL290W	RFC3	TTHERM_00213600	DDR
RFC	RFC3	YNL290W	RFC3	TTHERM_00213600	MMR
RFC	RFC3	YNL290W	RFC3	TTHERM_00213600	NER
TOP3	TOP3	YLR234W	NA	TTHERM_00216140	DSBR
TOP3	TOP3	YLR234W	NA	TTHERM_00216140	MMR
RAD54	RAD54	YGL163C	RAD54	TTHERM_00237490	DSBR
RFC	RFC2	YJR068W	RFC2	TTHERM_00245150	BER
clamp loader	RFC2	YJR068W	RFC2	TTHERM_00245150	DDR
RFC	RFC2	YJR068W	RFC2	TTHERM_00245150	MMR
RFC	RFC2	YJR068W	RFC2	TTHERM_00245150	NER
down stream mediators	CHK1	YBR274W	NA	TTHERM_00295610	DDR
MSH2	MSH2	YOL090W	MSH2	TTHERM_00295920	MMR
NA	RAD5	YLR032W	RAD5L4	TTHERM_00298220	ICL
XPD	RAD3	YER171W	NA	TTHERM_00298500	NER
down stream mediators	RAD53	YPL153C	NA	TTHERM_00300380	DDR
down stream mediators	RAD53	YPL153C	NA	TTHERM_00301710	DDR
CSB	RAD16	YBR114W	NA	TTHERM_00313280	NER
TFIIH	TFB2	YPL122C	NA	TTHERM_00313290	BER
TFIIH	TFB2	YPL122C	NA	TTHERM_00313290	NER
XPD	RAD3	YER171W	NA	TTHERM_00316410	NER
LIG1	CDC9	YDL164C	LIG1	TTHERM_00348170	BER
LIG1	CDC9	YDL164C	LIG1	TTHERM_00348170	DSBR
LIG1	CDC9	YDL164C	LIG1	TTHERM_00348170	NER
down stream mediators	RAD53	YPL153C	NA	TTHERM_00355740	DDR
LIGIV	DNL4	YOR005C	LIG4	TTHERM_00387050	DSBR
down stream mediators	RAD53	YPL153C	NA	TTHERM_00389660	DDR
NA	REV3	YPL167C	NA	TTHERM_00391570	ICL
NA	RAD5	YLR032W	RAD16	TTHERM_00420480	ICL
NA	SNM1/PSO2	YMR137C	SNML1	TTHERM_00433640	ICL
FEN1	RAD27	YKL113C	RAD27	TTHERM_00437617	BER
FEN1	RAD27	YKL113C	RAD27	TTHERM_00437617	DSBR
NA	REV3	YPL167C	REV3	TTHERM_00437650	ICL
POL Delta	POL3	YDL102W	NA	TTHERM_00444660	BER
POL Delta	POL3	YDL102W	NA	TTHERM_00444660	DSBR
POL Delta	POL3	YDL102W	NA	TTHERM_00444660	NER
RPB7	RPB7	YDR404C	RPB7	TTHERM_00446180	NER
down stream mediators	CHK1	YBR274W	NA	TTHERM_00449360	DDR
down stream mediators	CHK1	YBR274W	NA	TTHERM_00449370	DDR
down stream mediators	CHK1	YBR274W	NA	TTHERM_00449400	DDR
TOP3	TOP3	YLR234W	NA	TTHERM_00464990	DSBR
TOP3	TOP3	YLR234W	NA	TTHERM_00464990	MMR
TOP3	TOP3	YLR234W	NA	TTHERM_00465030	DSBR
TOP3	TOP3	YLR234W	NA	TTHERM_00465030	MMR
down stream mediators	RAD53	YPL153C	NA	TTHERM_00474550	DDR
KU80	YKU80	YMR106C	TKU80	TTHERM_00492460	DSBR
down stream mediators	RAD53	YPL153C	NA	TTHERM_00494350	DDR
down stream mediators	CHK1	YBR274W	NA	TTHERM_00497000	DDR
down stream mediators	CHK1	YBR274W	NA	TTHERM_00497250	DDR
TOP3	TOP3	YLR234W	TOP3	TTHERM_00497920	DSBR
TOP3	TOP3	YLR234W	TOP3	TTHERM_00497920	MMR
9-1-1 clamp	DDC1	YHR144C	DCD1	TTHERM_00498180	DDR
down stream mediators	RAD53	YPL153C	NA	TTHERM_00526980	DDR
down stream mediators	RAD53	YPL153C	NA	TTHERM_00534050	DDR
NA	RAD6	YGL058W	NA	TTHERM_00547960	ICL
KU70	YKU70	YMR284W	TKU71	TTHERM_00561799	DSBR
down stream mediators	CHK1	YBR274W	NA	TTHERM_00600470	DDR
MUS81/ERCC4	MUS81	YDR386W	MUS81	TTHERM_00624870	DSBR
POL Delta	POL3	YDL102W	POLD1	TTHERM_00636920	BER
POL Delta	POL3	YDL102W	POLD1	TTHERM_00636920	DSBR
POL Delta	POL3	YDL102W	POLD1	TTHERM_00636920	NER
down stream mediators	RAD53	YPL153C	NA	TTHERM_00637100	DDR
NA	MMS2	YGL087C	UCV2	TTHERM_00670590	ICL
down stream mediators	CHK1	YBR274W	NA	TTHERM_00670900	DDR
KU70	YKU70	YMR284W	NA	TTHERM_00684440	DSBR
XPD	RAD3	YER171W	RTEL1	TTHERM_00684490	NER
POL31	POL31	YJR006W	POL31	TTHERM_00691170	DSBR
down stream mediators	CHK1	YBR274W	NA	TTHERM_00715940	DDR
apical kinases	MRE11	YMR224C	MRE11	TTHERM_00721450	DDR
MRE11	MRE11	YMR224C	MRE11	TTHERM_00721450	DSBR
RPA1	RFA1	YAR007C	RLP1	TTHERM_00726370	DSBR
RPA1	RFA1	YAR007C	RLP1	TTHERM_00726370	NER
PARP1	NA	NA	PARP1	TTHERM_00726460	DSBR
POL4 (pol lambda)	POL4	YCR014C	POLB1	TTHERM_00732550	DSBR
RFC	RFC1	YOR217W	NA	TTHERM_00762900	BER
RFC	RFC1	YOR217W	NA	TTHERM_00762900	MMR
RFC	RFC1	YOR217W	NA	TTHERM_00762900	NER
MSH5/MutS	MSH5	YDL154W	MSH5	TTHERM_00763040	MMR
apical kinases	RAD50	YNL250W	RAD50	TTHERM_00773790	DDR
RAD50	RAD50	YNL250W	RAD50	TTHERM_00773790	DSBR
NA	RAD18	YCR066W	NA	TTHERM_00780660	ICL
RFC	RFC4	YOL094C	RFC4	TTHERM_00780750	BER
clamp loader	RFC4	YOL094C	RFC4	TTHERM_00780750	DDR
RFC	RFC4	YOL094C	RFC4	TTHERM_00780750	MMR
RFC	RFC4	YOL094C	RFC4	TTHERM_00780750	NER
UNG	UNG1	YML021C	UNG1	TTHERM_00794250	BER
NA	APN2	YBL019W	APN2	TTHERM_00794600	BER
down stream mediators	RAD53	YPL153C	NA	TTHERM_00815090	DDR
XPC	RAD4	YER162C	RAD4	TTHERM_00825460	NER
MET19	MET18	YIL128W	NA	TTHERM_00829370	NER
down stream mediators	RAD53	YPL153C	NA	TTHERM_00852690	DDR
MSH4/MutS	MSH4	YFL003C	MSH4	TTHERM_00857890	MMR
LIG1	CDC9	YDL164C	NA	TTHERM_00865240	BER
LIG1	CDC9	YDL164C	NA	TTHERM_00865240	DSBR
LIG1	CDC9	YDL164C	NA	TTHERM_00865240	NER
down stream mediators	CHK1	YBR274W	NA	TTHERM_00923220	DDR
CSB	RAD16	YBR114W	NA	TTHERM_00933250	NER
down stream mediators	RAD53	YPL153C	NA	TTHERM_00935420	DDR
RFC	RFC1	YOR217W	RFC1	TTHERM_00939110	BER
RFC	RFC1	YOR217W	RFC1	TTHERM_00939110	MMR
RFC	RFC1	YOR217W	RFC1	TTHERM_00939110	NER
down stream mediators	RAD53	YPL153C	NA	TTHERM_00976420	DDR
apical kinases	MEC1	YBR136W	ATR1	TTHERM_01008650	DDR
down stream mediators	RAD53	YPL153C	NA	TTHERM_01018400	DDR
down stream mediators	RAD53	YPL153C	NA	TTHERM_01026430	DDR
RecQ	SGS1	YMR190C	SGS1	TTHERM_01030000	DSBR
RecQL, RecQ4, RecQ5, BLM, WRN	SGS1	YMR190C	SGS1	TTHERM_01030000	MMR
down stream mediators	RAD53	YPL153C	NA	TTHERM_01044420	DDR
down stream mediators	RAD53	YPL153C	NA	TTHERM_01049260	DDR
NTH1	NTG1	YAL015C	NTG1	TTHERM_01106120	BER
PCNA	POL30	YBR088C	PCNA1	TTHERM_01107420	BER
PCNA	PCNA	YBR088C	PCNA1	TTHERM_01107420	MMR
PCNA	PCNA	YBR088C	PCNA1	TTHERM_01107420	NER
PMS2	PMS1	YNL082W	PMS2	TTHERM_01109940	MMR
NA	UBC13	YDR092W	UCN2	TTHERM_01123950	ICL
RAD51	RAD51	YER095W	NA	TTHERM_01143840	DSBR
XPG	EXO1	YOR033C	EXO1	TTHERM_01179960	DSBR
XPG	EXO1	YOR033C	EXO1	TTHERM_01179960	MMR
XPG	EXO1	YOR033C	EXO1	TTHERM_01179960	NER
down stream mediators	RAD53	YPL153C	NA	TTHERM_01205310	DDR
OGG1	OGG1	YML060W	OGL1	TTHERM_01243450	BER
down stream mediators	RAD53	YPL153C	NA	TTHERM_01246670	DDR
down stream mediators	RAD53	YPL153C	NA	TTHERM_01246690	DDR
TOP3	TOP3	YLR234W	NA	TTHERM_01262890	DSBR
TOP3	TOP3	YLR234W	NA	TTHERM_01262890	MMR
down stream mediators	CHK1	YBR274W	NA	TTHERM_01358400	DDR
down stream mediators	RAD53	YPL153C	NA	TTHERM_01376880	DDR
down stream mediators	RAD53	YPL153C	NA	TTHERM_01494740	DDR
ELOC	ELC1	YPL046C	NA	TTHERM_01658030	NER

## Sheet: README
Supplemental Table S2. DNA damage repair genes and pathways
