# Supplementary material for: A systems view on DNA damage response kinetics in Tetrahymena
Source: HighWire-hosted journal article supplement (doi:10.1101/gr.281000.125), 2026-01-28
Supplement: Supplemental_Table_S3.xlsx [file Supplemental_Table_S3.xlsx]

## Sheet: Supplemental_Table_S3_StatsOver
Intersections	Degree	Observed.Overlap	Expected.Overlap	FE	P.value	significant
CPT	1	2815	NA	NA	NA	NA
UV	1	4964	NA	NA	NA	NA
UV & CPT	2	1395	1585.21	0.880007	1	FALSE
MMS	1	2341	NA	NA	NA	NA
MMS & CPT	2	979	747.58	1.30956	2.33080163927976e-32	TRUE
MMS & UV	2	1277	1318.29	0.968679	0.978851	FALSE
MMS & UV & CPT	3	636	420.985	1.51074	3.64230137861945e-34	TRUE
HP	1	880	NA	NA	NA	NA
HP & CPT	2	309	281.021	1.09956	0.018647	TRUE
HP & UV	2	520	495.555	1.04933	0.0429108	TRUE
HP & UV & CPT	3	222	158.252	1.40283	1.79581083745033e-08	TRUE
HP & MMS	2	336	233.702	1.43773	1.14153834514278e-15	TRUE
HP & MMS & CPT	3	196	74.6308	2.62626	5.74307952280563e-38	TRUE
HP & MMS & UV	3	252	131.605	1.91483	3.72805162036016e-27	TRUE
HP & MMS & UV & CPT	4	152	42.0269	3.61673	2.23193324972204e-44	TRUE
IR	1	3670	NA	NA	NA	NA
IR & CPT	2	1178	1171.99	1.00513	0.398972	FALSE
IR & UV	2	1803	2066.69	0.872409	1	FALSE
IR & UV & CPT	3	787	659.981	1.19246	2.01914907280291e-10	TRUE
IR & MMS	2	1044	974.642	1.07116	0.00038559	TRUE
IR & MMS & CPT	3	571	311.244	1.83457	9.08139635501999e-57	TRUE
IR & MMS & UV	3	718	548.851	1.30819	4.239365077376e-19	TRUE
IR & MMS & UV & CPT	4	424	175.271	2.41911	5.46145017142061e-72	TRUE
IR & HP	2	386	366.375	1.05356	0.0842429	FALSE
IR & HP & CPT	3	205	116.999	1.75215	6.88726618783614e-17	TRUE
IR & HP & UV	3	280	206.317	1.35713	2.63204501957711e-09	TRUE
IR & HP & UV & CPT	4	164	65.8858	2.48915	2.88675036589244e-28	TRUE
IR & HP & MMS	3	210	97.2984	2.15831	1.0794153911392e-28	TRUE
IR & HP & MMS & CPT	4	145	31.0715	4.66666	2.53565542833977e-55	TRUE
IR & HP & MMS & UV	4	168	54.7917	3.06616	5.05230019094815e-40	TRUE
IR & HP & MMS & UV & CPT	5	119	17.4973	6.80105	1.12083294251925e-61	TRUE
HU	1	1408	NA	NA	NA	NA
HU & CPT	2	418	449.634	0.929646	0.977886	FALSE
HU & UV	2	791	792.888	0.997618	0.555993	FALSE
HU & UV & CPT	3	300	253.203	1.18482	0.000434473	TRUE
HU & MMS	2	629	373.923	1.68217	1.88159943329095e-58	TRUE
HU & MMS & CPT	3	252	119.409	2.11039	4.78925776276779e-32	TRUE
HU & MMS & UV	3	442	210.567	2.09909	9.13918137197058e-62	TRUE
HU & MMS & UV & CPT	4	209	67.243	3.10813	3.81984774522671e-50	TRUE
HU & HP	2	187	140.56	1.33039	8.10770110842428e-06	TRUE
HU & HP & CPT	3	79	44.8868	1.75998	7.34655610293042e-07	TRUE
HU & HP & UV	3	127	79.1539	1.60447	3.78378336622542e-08	TRUE
HU & HP & UV & CPT	4	63	25.2772	2.49237	4.35909584920443e-11	TRUE
HU & HP & MMS	3	105	37.3286	2.81285	5.90587648204412e-22	TRUE
HU & HP & MMS & CPT	4	59	11.9206	4.94941	1.40784236847991e-23	TRUE
HU & HP & MMS & UV	4	79	21.0209	3.75816	7.91510900583877e-24	TRUE
HU & HP & MMS & UV & CPT	5	51	6.71286	7.59736	1.27160252286219e-28	TRUE
HU & IR	2	692	586.201	1.18048	3.23435245885798e-10	TRUE
HU & IR & CPT	3	261	187.199	1.39424	3.964292973611e-09	TRUE
HU & IR & UV	3	474	330.108	1.43589	1.75746981742696e-20	TRUE
HU & IR & UV & CPT	4	213	105.417	2.02054	7.39135851484033e-24	TRUE
HU & IR & MMS	3	375	155.677	2.40883	5.94291711977475e-66	TRUE
HU & IR & MMS & CPT	4	180	49.7143	3.62069	6.96616333578015e-52	TRUE
HU & IR & MMS & UV	4	294	87.6668	3.35361	7.5922147662564e-81	TRUE
HU & IR & MMS & UV & CPT	5	161	27.9957	5.75089	6.88363789886575e-73	TRUE
HU & IR & HP	3	110	58.5203	1.87969	7.30856574511257e-11	TRUE
HU & IR & HP & CPT	4	59	18.688	3.15711	1.38768138021374e-14	TRUE
HU & IR & HP & UV	4	87	32.9546	2.63999	1.86065794294804e-16	TRUE
HU & IR & HP & UV & CPT	5	53	10.5238	5.03621	1.51790045072664e-21	TRUE
HU & IR & HP & MMS	4	72	15.5412	4.63283	5.84742994902579e-27	TRUE
HU & IR & HP & MMS & CPT	5	47	4.96297	9.47013	1.72633062780034e-30	TRUE
HU & IR & HP & MMS & UV	5	59	8.75176	6.7415	2.67987475272401e-30	TRUE
HU & IR & HP & MMS & UV & CPT	6	43	2.7948	15.3857	2.193431135044e-36	TRUE

## Sheet: README
Supplemental Table S3. Fisher’s exact test results for overlap between dynamic transcripts in different DNA damage treatments
