# Supplementary material for: A systems view on DNA damage response kinetics in Tetrahymena
Source: HighWire-hosted journal article supplement (doi:10.1101/gr.281000.125), 2026-01-28
Supplement: Supplemental_Table_S4.xlsx [file Supplemental_Table_S4.xlsx]

## Sheet: Supplemental_Table_S4
name	value	Gene.Name	yeast_ttherm
HU_IR_HP_MMS_UV_CPT	TTHERM_000141009	NA	NA
HU_IR_HP_MMS_UV	TTHERM_00022810	ICL1.TTHERM_00022810	ICL1.TTHERM_00022810
HU_IR_HP_MMS_CPT	TTHERM_00112490	HARPL1	ISW1.TTHERM_00112490
HU_IR_HP_UV_CPT	TTHERM_00113120	NA	NA
HU_IR_MMS_UV_CPT	TTHERM_000051969	NA	NA
HU_HP_MMS_UV_CPT	TTHERM_00052160	TTNB	NA
IR_HP_MMS_UV_CPT	TTHERM_00006460	NA	NA
HU_IR_HP_MMS	TTHERM_00037050	CCT4	CCT4.TTHERM_00037050
HU_IR_HP_UV	TTHERM_00037460	ATG82	ATG8.TTHERM_00037460
HU_IR_HP_CPT	TTHERM_00141170	GPX9	HYR1.TTHERM_00141170
HU_IR_MMS_UV	TTHERM_000145639	NA	NA
HU_IR_MMS_CPT	TTHERM_000488189	STU2.TTHERM_000488189	STU2.TTHERM_000488189
HU_IR_UV_CPT	TTHERM_00013530	NA	NA
HU_HP_MMS_UV	TTHERM_00001380	NA	NA
HU_HP_MMS_CPT	TTHERM_00390080	NA	NA
HU_HP_UV_CPT	TTHERM_000437579	NA	NA
HU_MMS_UV_CPT	TTHERM_000569069	NA	NA
IR_HP_MMS_UV	TTHERM_00046680	RIO1	RIO1.TTHERM_00046680
IR_HP_MMS_CPT	TTHERM_00001430	NA	NA
IR_HP_UV_CPT	TTHERM_00043780	POLN1	NA
IR_MMS_UV_CPT	TTHERM_000059039	NA	NA
HP_MMS_UV_CPT	TTHERM_00004840	NA	NA
HU_IR_HP	TTHERM_000125279	NA	NA
HU_IR_MMS	TTHERM_00004830	SSF2.TTHERM_00004830	SSF2.TTHERM_00004830
HU_IR_UV	TTHERM_00006220	YOP1.TTHERM_00006220	YOP1.TTHERM_00006220
HU_IR_CPT	TTHERM_000001189	NA	NA
HU_HP_MMS	TTHERM_00035060	NA	NA
HU_HP_UV	TTHERM_00010970	TOM71.TTHERM_00010970	TOM71.TTHERM_00010970
HU_HP_CPT	TTHERM_00016220	NA	NA
HU_MMS_UV	TTHERM_000079488	NA	NA
HU_MMS_CPT	TTHERM_000310208	NA	NA
HU_UV_CPT	TTHERM_00005950	NA	NA
IR_HP_MMS	TTHERM_000446267	NA	NA
IR_HP_UV	TTHERM_00037290	NA	NA
IR_HP_CPT	TTHERM_000156669	NA	NA
IR_MMS_UV	TTHERM_000037428	NA	NA
IR_MMS_CPT	TTHERM_000011759	MCM7.TTHERM_000011759	MCM7.TTHERM_000011759
IR_UV_CPT	TTHERM_000008779	NA	NA
HP_MMS_UV	TTHERM_00011800	NA	NA
HP_MMS_CPT	TTHERM_000046378	APL5.TTHERM_000046378	APL5.TTHERM_000046378
HP_UV_CPT	TTHERM_00011810	NA	NA
MMS_UV_CPT	TTHERM_000128319	GDB1.TTHERM_000128319	GDB1.TTHERM_000128319
HU_IR	TTHERM_00012970	NA	NA
HU_HP	TTHERM_00047440	DIS32	DIS3.TTHERM_00047440
HU_MMS	TTHERM_00002630	NA	NA
HU_UV	TTHERM_000028469	NA	NA
HU_CPT	TTHERM_000426209	NA	NA
IR_HP	TTHERM_000294939	YPT32.TTHERM_000294939	YPT32.TTHERM_000294939
IR_MMS	TTHERM_00008800	REX4	REX4.TTHERM_00008800
IR_UV	TTHERM_000013199	NA	NA
IR_CPT	TTHERM_000006059	NA	NA
HP_MMS	TTHERM_00046090	GPX8	GPX2.TTHERM_00046090
HP_UV	TTHERM_00011650	RAD10	RAD10.TTHERM_00011650
HP_CPT	TTHERM_00006180	NA	NA
MMS_UV	TTHERM_000047049	NA	NA
MMS_CPT	TTHERM_000030359	NA	NA
UV_CPT	TTHERM_00001310	NA	NA
HU	TTHERM_000011248	NA	NA
IR	TTHERM_00000020	RAD53.TTHERM_00000020	RAD53.TTHERM_00000020
HP	TTHERM_000047509	NA	NA
MMS	TTHERM_00001180	NA	NA
UV	TTHERM_00000040	NA	NA
CPT	TTHERM_000000042	NA	NA
HU_IR_HP_MMS_UV_CPT	TTHERM_00035610	NA	NA
HU_IR_HP_MMS_UV	TTHERM_00070730	MDN1.TTHERM_00070730	MDN1.TTHERM_00070730
HU_IR_HP_MMS_CPT	TTHERM_00304260	NA	NA
HU_IR_HP_UV_CPT	TTHERM_00125500	KET1	KIP1.TTHERM_00125500
HU_IR_MMS_UV_CPT	TTHERM_00006320	TTNA	NA
HU_HP_MMS_UV_CPT	TTHERM_00086760	GRPE1	MGE1.TTHERM_00086760
IR_HP_MMS_UV_CPT	TTHERM_000160559	XPF1	RAD1.TTHERM_000160559
HU_IR_HP_MMS	TTHERM_00122290	TCP1	TCP1.TTHERM_00122290
HU_IR_HP_UV	TTHERM_00112820	NA	NA
HU_IR_HP_CPT	TTHERM_00575390	MAI63	GTT2.TTHERM_00575390
HU_IR_MMS_UV	TTHERM_00023980	RAN1	GSP2.TTHERM_00023980
HU_IR_MMS_CPT	TTHERM_001080487	NA	NA
HU_IR_UV_CPT	TTHERM_00053810	NA	NA
HU_HP_MMS_UV	TTHERM_00069440	SKY1.TTHERM_00069440	SKY1.TTHERM_00069440
HU_HP_MMS_CPT	TTHERM_00497960	CCT7	CCT7.TTHERM_00497960
HU_HP_UV_CPT	TTHERM_00760370	DCP2.TTHERM_00760370	DCP2.TTHERM_00760370
HU_MMS_UV_CPT	TTHERM_000661719	NA	NA
IR_HP_MMS_UV	TTHERM_00047120	NA	NA
IR_HP_MMS_CPT	TTHERM_000516399	PAN1.TTHERM_000516399	PAN1.TTHERM_000516399
IR_HP_UV_CPT	TTHERM_000497639	NA	NA
IR_MMS_UV_CPT	TTHERM_00011710	CTH2	PEP4.TTHERM_00011710
HP_MMS_UV_CPT	TTHERM_00006350	SPC110.TTHERM_00006350	SPC110.TTHERM_00006350
HU_IR_HP	TTHERM_00149450	LYS1.TTHERM_00149450	LYS1.TTHERM_00149450
HU_IR_MMS	TTHERM_000347988	NA	NA
HU_IR_UV	TTHERM_00011730	MRF1.TTHERM_00011730	MRF1.TTHERM_00011730
HU_IR_CPT	TTHERM_00034920	YOL075C.TTHERM_00034920	YOL075C.TTHERM_00034920
HU_HP_MMS	TTHERM_00059090	NA	NA
HU_HP_UV	TTHERM_00012980	ATG10	ATG3.TTHERM_00012980
HU_HP_CPT	TTHERM_000648677	UBI4.TTHERM_000648677	UBI4.TTHERM_000648677
HU_MMS_UV	TTHERM_00011450	PUS1	PUS1.TTHERM_00011450
HU_MMS_CPT	TTHERM_00085670	NA	NA
HU_UV_CPT	TTHERM_00008790	NA	NA
IR_HP_MMS	TTHERM_00079410	NA	NA
IR_HP_UV	TTHERM_00037530	SNF1.TTHERM_00037530	SNF1.TTHERM_00037530
IR_HP_CPT	TTHERM_00049280	NA	NA
IR_MMS_UV	TTHERM_00006110	NA	NA
IR_MMS_CPT	TTHERM_000052539	NA	NA
IR_UV_CPT	TTHERM_00001080	RAB4A	YPT31.TTHERM_00001080
HP_MMS_UV	TTHERM_00013500	NA	NA
HP_MMS_CPT	TTHERM_00133500	CCP1.TTHERM_00133500	CCP1.TTHERM_00133500
HP_UV_CPT	TTHERM_000128498	NA	NA
MMS_UV_CPT	TTHERM_000129409	NA	NA
HU_IR	TTHERM_00016050	CUT1	NA
HU_HP	TTHERM_00075630	NA	NA
HU_MMS	TTHERM_000032894	YOL075C.TTHERM_000032894	YOL075C.TTHERM_000032894
HU_UV	TTHERM_000056079	NA	NA
HU_CPT	TTHERM_00046370	NA	NA
IR_HP	TTHERM_00069368	PPT1.TTHERM_00069368	PPT1.TTHERM_00069368
IR_MMS	TTHERM_00011220	CMK2.TTHERM_00011220	CMK2.TTHERM_00011220
IR_UV	TTHERM_000047139	NA	NA
IR_CPT	TTHERM_000016009	NA	NA
HP_MMS	TTHERM_00047320	NA	NA
HP_UV	TTHERM_000284109	NA	NA
HP_CPT	TTHERM_000285449	NA	NA
MMS_UV	TTHERM_00006030	NA	NA
MMS_CPT	TTHERM_000032869	YOL075C.TTHERM_000032869	YOL075C.TTHERM_000032869
UV_CPT	TTHERM_000030601	GPI13.TTHERM_000030601	GPI13.TTHERM_000030601
HU	TTHERM_000037129	NA	NA
IR	TTHERM_00000030	CMK2.TTHERM_00000030	CMK2.TTHERM_00000030
HP	TTHERM_000095441	NA	NA
MMS	TTHERM_00002660	LIH1.TTHERM_00002660	LIH1.TTHERM_00002660
UV	TTHERM_000001131	NA	NA
CPT	TTHERM_00001300	YFH7.TTHERM_00001300	YFH7.TTHERM_00001300
HU_IR_HP_MMS_UV_CPT	TTHERM_00047170	RRM61	NSR1.TTHERM_00047170
HU_IR_HP_MMS_UV	TTHERM_00312190	NA	NA
HU_IR_HP_MMS_CPT	TTHERM_00499440	TGP3	NA
HU_IR_HP_UV_CPT	TTHERM_00142420	GLR1.TTHERM_00142420	GLR1.TTHERM_00142420
HU_IR_MMS_UV_CPT	TTHERM_00011160	NA	NA
HU_HP_MMS_UV_CPT	TTHERM_00215910	NA	NA
IR_HP_MMS_UV_CPT	TTHERM_00030430	PARP3	NA
HU_IR_HP_MMS	TTHERM_00149340	CCT2	CCT2.TTHERM_00149340
HU_IR_HP_UV	TTHERM_00131330	CUZ1.TTHERM_00131330	CUZ1.TTHERM_00131330
HU_IR_HP_CPT	NA	NA	NA
HU_IR_MMS_UV	TTHERM_00035630	RPF2.TTHERM_00035630	RPF2.TTHERM_00035630
HU_IR_MMS_CPT	TTHERM_001108531	NA	NA
HU_IR_UV_CPT	TTHERM_000586763	NA	NA
HU_HP_MMS_UV	TTHERM_00148750	ADK1.TTHERM_00148750	ADK1.TTHERM_00148750
HU_HP_MMS_CPT	TTHERM_00685970	RRM44	NAB3.TTHERM_00685970
HU_HP_UV_CPT	NA	NA	NA
HU_MMS_UV_CPT	TTHERM_00077450	MAM33.TTHERM_00077450	MAM33.TTHERM_00077450
IR_HP_MMS_UV	TTHERM_00092870	NA	NA
IR_HP_MMS_CPT	TTHERM_000947489	NA	NA
IR_HP_UV_CPT	TTHERM_000941379	NA	NA
IR_MMS_UV_CPT	TTHERM_000136238	NA	NA
HP_MMS_UV_CPT	TTHERM_00046070	NA	NA
HU_IR_HP	TTHERM_00259330	NA	NA
HU_IR_MMS	TTHERM_00036950	NA	NA
HU_IR_UV	TTHERM_00013070	NA	NA
HU_IR_CPT	TTHERM_000452041	NA	NA
HU_HP_MMS	TTHERM_00122500	NA	NA
HU_HP_UV	TTHERM_000161759	TIS11.TTHERM_000161759	TIS11.TTHERM_000161759
HU_HP_CPT	TTHERM_00689880	NA	NA
HU_MMS_UV	TTHERM_00011760	RPC19	RPC19.TTHERM_00011760
HU_MMS_CPT	TTHERM_00096650	NA	NA
HU_UV_CPT	TTHERM_00013010	NA	NA
IR_HP_MMS	TTHERM_00379000	EPC1	NA
IR_HP_UV	TTHERM_00147560	PRE1	PRE1.TTHERM_00147560
IR_HP_CPT	TTHERM_00146110	NA	NA
IR_MMS_UV	TTHERM_00013060	CYC31	PCL6.TTHERM_00013060
IR_MMS_CPT	TTHERM_00006240	YBT1.TTHERM_00006240	YBT1.TTHERM_00006240
IR_UV_CPT	TTHERM_000043839	NA	NA
HP_MMS_UV	TTHERM_000205206	NA	NA
HP_MMS_CPT	TTHERM_00240450	STE6.TTHERM_00240450	STE6.TTHERM_00240450
HP_UV_CPT	TTHERM_000151909	NA	NA
MMS_UV_CPT	TTHERM_000149719	NA	NA
HU_IR	TTHERM_000161459	NA	NA
HU_HP	TTHERM_000920829	NA	NA
HU_MMS	TTHERM_000161297	CMD1.TTHERM_000161297	CMD1.TTHERM_000161297
HU_UV	TTHERM_00011880	NA	NA
HU_CPT	TTHERM_00056050	NA	NA
IR_HP	TTHERM_00077240	TTU3	UBI4.TTHERM_00077240
IR_MMS	TTHERM_000113149	NA	NA
IR_UV	TTHERM_00006060	PARP7	NA
IR_CPT	TTHERM_00007520	NA	NA
HP_MMS	TTHERM_00047680	NA	NA
HP_UV	TTHERM_00030330	NA	NA
HP_CPT	TTHERM_000304329	NA	NA
MMS_UV	TTHERM_000086966	NA	NA
MMS_CPT	TTHERM_000092809	NA	NA
UV_CPT	TTHERM_000037679	NA	NA
HU	TTHERM_000043859	NA	NA
IR	TTHERM_00001220	NA	NA
HP	TTHERM_000142269	NA	NA
MMS	TTHERM_000028549	RNR1.TTHERM_000028549	RNR1.TTHERM_000028549
UV	TTHERM_000001243	NA	NA
CPT	TTHERM_00001370	NA	NA
HU_IR_HP_MMS_UV_CPT	TTHERM_00048880	NA	NA
HU_IR_HP_MMS_UV	TTHERM_00455650	NUG1	NUG1.TTHERM_00455650
HU_IR_HP_MMS_CPT	TTHERM_00895660	GPX2	HYR1.TTHERM_00895660
HU_IR_HP_UV_CPT	TTHERM_00459300	NA	NA
HU_IR_MMS_UV_CPT	TTHERM_00011900	NA	NA
HU_HP_MMS_UV_CPT	TTHERM_00265100	YPK9.TTHERM_00265100	YPK9.TTHERM_00265100
IR_HP_MMS_UV_CPT	TTHERM_00030580	NA	NA
HU_IR_HP_MMS	TTHERM_00239290	CCT3	CCT3.TTHERM_00239290
HU_IR_HP_UV	TTHERM_00148760	SDO1.TTHERM_00148760	SDO1.TTHERM_00148760
HU_IR_HP_CPT	NA	NA	NA
HU_IR_MMS_UV	TTHERM_00047550	RPA1	RPA190.TTHERM_00047550
HU_IR_MMS_CPT	TTHERM_00160800	OYE3.TTHERM_00160800	OYE3.TTHERM_00160800
HU_IR_UV_CPT	TTHERM_00066900	GPI8.TTHERM_00066900	GPI8.TTHERM_00066900
HU_HP_MMS_UV	TTHERM_00384860	MLP1	NA
HU_HP_MMS_CPT	TTHERM_00941470	NA	NA
HU_HP_UV_CPT	NA	NA	NA
HU_MMS_UV_CPT	TTHERM_00091750	NA	NA
IR_HP_MMS_UV	TTHERM_00102820	NA	NA
IR_HP_MMS_CPT	TTHERM_00171850	SSA6	SSA3.TTHERM_00171850
IR_HP_UV_CPT	TTHERM_00145620	NA	NA
IR_MMS_UV_CPT	TTHERM_000136239	NA	NA
HP_MMS_UV_CPT	TTHERM_000476531	NA	NA
HU_IR_HP	TTHERM_00433880	ICT1.TTHERM_00433880	ICT1.TTHERM_00433880
HU_IR_MMS	TTHERM_00037060	CCT8	CCT8.TTHERM_00037060
HU_IR_UV	TTHERM_000188369	SEC14.TTHERM_000188369	SEC14.TTHERM_000188369
HU_IR_CPT	TTHERM_00136180	NA	NA
HU_HP_MMS	TTHERM_00146410	SUP35.TTHERM_00146410	SUP35.TTHERM_00146410
HU_HP_UV	TTHERM_00051880	CYB5.TTHERM_00051880	CYB5.TTHERM_00051880
HU_HP_CPT	TTHERM_00691550	NA	NA
HU_MMS_UV	TTHERM_00030190	MDH1	MDH1.TTHERM_00030190
HU_MMS_CPT	TTHERM_00149859	TRX3.TTHERM_00149859	TRX3.TTHERM_00149859
HU_UV_CPT	TTHERM_00019660	HPM1.TTHERM_00019660	HPM1.TTHERM_00019660
IR_HP_MMS	TTHERM_00399170	NA	NA
IR_HP_UV	TTHERM_00149390	NA	NA
IR_HP_CPT	TTHERM_00317040	NA	NA
IR_MMS_UV	TTHERM_000218479	ASR1.TTHERM_000218479	ASR1.TTHERM_000218479
IR_MMS_CPT	TTHERM_000094109	PAB1.TTHERM_000094109	PAB1.TTHERM_000094109
IR_UV_CPT	TTHERM_000079489	NA	NA
HP_MMS_UV	TTHERM_00031680	THD7	UBP14.TTHERM_00031680
HP_MMS_CPT	TTHERM_00283800	AVP1	KEL2.TTHERM_00283800
HP_UV_CPT	TTHERM_000295039	CDC48.TTHERM_000295039	CDC48.TTHERM_000295039
MMS_UV_CPT	TTHERM_000157889	NA	NA
HU_IR	TTHERM_00016490	SEC22.TTHERM_00016490	SEC22.TTHERM_00016490
HU_HP	TTHERM_00105150	PSE1.TTHERM_00105150	PSE1.TTHERM_00105150
HU_MMS	TTHERM_00037280	NA	NA
HU_UV	TTHERM_000145988	NA	NA
HU_CPT	TTHERM_00059080	NA	NA
IR_HP	TTHERM_000784329	OYE2.TTHERM_000784329	OYE2.TTHERM_000784329
IR_MMS	TTHERM_000220709	NA	NA
IR_UV	TTHERM_00006070	PARP8	NA
IR_CPT	TTHERM_00011140	NA	NA
HP_MMS	TTHERM_00251150	NA	NA
HP_UV	TTHERM_00035190	SEC3.TTHERM_00035190	SEC3.TTHERM_00035190
HP_CPT	TTHERM_00051700	RRM70	NA
MMS_UV	TTHERM_000138049	NA	NA
MMS_CPT	TTHERM_00011170	CYC8.TTHERM_00011170	CYC8.TTHERM_00011170
UV_CPT	TTHERM_00004820	NA	NA
HU	TTHERM_000052209	DSK2.TTHERM_000052209	DSK2.TTHERM_000052209
IR	TTHERM_00001440	NA	NA
HP	TTHERM_000145039	NA	NA
MMS	TTHERM_000059119	NA	NA
UV	TTHERM_000002659	NA	NA
CPT	TTHERM_000030419	NA	NA
HU_IR_HP_MMS_UV_CPT	TTHERM_000676940	PHO85.TTHERM_000676940	PHO85.TTHERM_000676940
HU_IR_HP_MMS_UV	TTHERM_00471630	NA	NA
HU_IR_HP_MMS_CPT	NA	NA	NA
HU_IR_HP_UV_CPT	TTHERM_00558230	YOR1.TTHERM_00558230	YOR1.TTHERM_00558230
HU_IR_MMS_UV_CPT	TTHERM_000157929	SRP1.TTHERM_000157929	SRP1.TTHERM_000157929
HU_HP_MMS_UV_CPT	TTHERM_00467770	PCP3	NA
IR_HP_MMS_UV_CPT	TTHERM_00035530	NA	NA
HU_IR_HP_MMS	TTHERM_00572010	GST57	NA
HU_IR_HP_UV	TTHERM_00204080	NA	NA
HU_IR_HP_CPT	NA	NA	NA
HU_IR_MMS_UV	TTHERM_000497799	EBP2.TTHERM_000497799	EBP2.TTHERM_000497799
HU_IR_MMS_CPT	TTHERM_00187110	NA	NA
HU_IR_UV_CPT	TTHERM_00077730	NA	NA
HU_HP_MMS_UV	TTHERM_00557930	UTP20	UTP20.TTHERM_00557930
HU_HP_MMS_CPT	NA	NA	NA
HU_HP_UV_CPT	NA	NA	NA
HU_MMS_UV_CPT	TTHERM_001016149	YMR310C.TTHERM_001016149	YMR310C.TTHERM_001016149
IR_HP_MMS_UV	TTHERM_00104960	NA	NA
IR_HP_MMS_CPT	TTHERM_00241790	PMR1.TTHERM_00241790	PMR1.TTHERM_00241790
IR_HP_UV_CPT	TTHERM_00170520	NA	NA
IR_MMS_UV_CPT	TTHERM_00016060	YMR226C.TTHERM_00016060	YMR226C.TTHERM_00016060
HP_MMS_UV_CPT	TTHERM_00145810	NA	NA
HU_IR_HP	TTHERM_00578700	NA	NA
HU_IR_MMS	TTHERM_000446268	NA	NA
HU_IR_UV	TTHERM_000191679	YPL150W.TTHERM_000191679	YPL150W.TTHERM_000191679
HU_IR_CPT	TTHERM_00137750	ERG11.TTHERM_00137750	ERG11.TTHERM_00137750
HU_HP_MMS	TTHERM_00551040	NA	NA
HU_HP_UV	TTHERM_000672189	HST2.TTHERM_000672189	HST2.TTHERM_000672189
HU_HP_CPT	TTHERM_00974260	ERS1	MSE1.TTHERM_00974260
HU_MMS_UV	TTHERM_00035070	YKL021C.TTHERM_00035070	YKL021C.TTHERM_00035070
HU_MMS_CPT	TTHERM_00352190	LIH1.TTHERM_00352190	LIH1.TTHERM_00352190
HU_UV_CPT	TTHERM_000503740	NA	NA
IR_HP_MMS	TTHERM_00532770	NA	NA
IR_HP_UV	TTHERM_00155240	NA	NA
IR_HP_CPT	TTHERM_00317160	EKI1.TTHERM_00317160	EKI1.TTHERM_00317160
IR_MMS_UV	TTHERM_000305651	NA	NA
IR_MMS_CPT	TTHERM_00013410	CDA12	NA
IR_UV_CPT	TTHERM_00011040	NA	NA
HP_MMS_UV	TTHERM_00046080	NA	NA
HP_MMS_CPT	TTHERM_00560040	NA	NA
HP_UV_CPT	TTHERM_000311961	NA	NA
MMS_UV_CPT	TTHERM_00030550	NA	NA
HU_IR	TTHERM_00024050	ELP1	IKI3.TTHERM_00024050
HU_HP	TTHERM_00123880	NA	NA
HU_MMS	TTHERM_00043810	BCD1.TTHERM_00043810	BCD1.TTHERM_00043810
HU_UV	TTHERM_000268279	NA	NA
HU_CPT	TTHERM_000655859	NA	NA
IR_HP	TTHERM_000849319	NA	NA
IR_MMS	TTHERM_000242129	MAK3.TTHERM_000242129	MAK3.TTHERM_000242129
IR_UV	TTHERM_00006080	CHS10	CHS2.TTHERM_00006080
IR_CPT	TTHERM_00016460	URA6.TTHERM_00016460	URA6.TTHERM_00016460
HP_MMS	TTHERM_00285250	TUP1.TTHERM_00285250	TUP1.TTHERM_00285250
HP_UV	TTHERM_00037730	NA	NA
HP_CPT	TTHERM_000827129	NA	NA
MMS_UV	TTHERM_00030210	LC7B	NA
MMS_CPT	TTHERM_000160869	NA	NA
UV_CPT	TTHERM_000077668	NA	NA
HU	TTHERM_00010920	NA	NA
IR	TTHERM_00002730	NA	NA
HP	TTHERM_000157849	NA	NA
MMS	TTHERM_00006450	NA	NA
UV	TTHERM_000011369	SRV2.TTHERM_000011369	SRV2.TTHERM_000011369
CPT	TTHERM_000035239	RPS24A.TTHERM_000035239	RPS24A.TTHERM_000035239
HU_IR_HP_MMS_UV_CPT	TTHERM_00106870	FZY5	CDH1.TTHERM_00106870
HU_IR_HP_MMS_UV	TTHERM_00471930	NA	NA
HU_IR_HP_MMS_CPT	NA	NA	NA
HU_IR_HP_UV_CPT	TTHERM_00560060	NA	NA
HU_IR_MMS_UV_CPT	TTHERM_00016000	MDV1.TTHERM_00016000	MDV1.TTHERM_00016000
HU_HP_MMS_UV_CPT	TTHERM_00543570	LSF10	NA
IR_HP_MMS_UV_CPT	TTHERM_00037210	RAD5	RAD5.TTHERM_00037210
HU_IR_HP_MMS	TTHERM_00640030	NA	NA
HU_IR_HP_UV	TTHERM_00221110	PUF3	PUF3.TTHERM_00221110
HU_IR_HP_CPT	NA	NA	NA
HU_IR_MMS_UV	TTHERM_00051730	PAB1.TTHERM_00051730	PAB1.TTHERM_00051730
HU_IR_MMS_CPT	TTHERM_00237500	MDH2	NA
HU_IR_UV_CPT	TTHERM_00105490	NA	NA
HU_HP_MMS_UV	TTHERM_00558640	DYH16	DYN1.TTHERM_00558640
HU_HP_MMS_CPT	NA	NA	NA
HU_HP_UV_CPT	NA	NA	NA
HU_MMS_UV_CPT	TTHERM_00145090	ETR1.TTHERM_00145090	ETR1.TTHERM_00145090
IR_HP_MMS_UV	TTHERM_00138240	USO1.TTHERM_00138240	USO1.TTHERM_00138240
IR_HP_MMS_CPT	TTHERM_00277550	MCM4	MCM4.TTHERM_00277550
IR_HP_UV_CPT	TTHERM_00196060	YMR114C.TTHERM_00196060	YMR114C.TTHERM_00196060
IR_MMS_UV_CPT	TTHERM_000252299	NA	NA
HP_MMS_UV_CPT	TTHERM_00188900	NA	NA
HU_IR_HP	TTHERM_00658970	UBC8.TTHERM_00658970	UBC8.TTHERM_00658970
HU_IR_MMS	TTHERM_000470409	NA	NA
HU_IR_UV	TTHERM_00035520	NA	NA
HU_IR_CPT	TTHERM_00188800	NA	NA
HU_HP_MMS	TTHERM_00581990	NA	NA
HU_HP_UV	TTHERM_00122340	NA	NA
HU_HP_CPT	TTHERM_01222600	GLR1.TTHERM_01222600	GLR1.TTHERM_01222600
HU_MMS_UV	TTHERM_00046770	UTP13	UTP13.TTHERM_00046770
HU_MMS_CPT	TTHERM_00423260	NA	NA
HU_UV_CPT	TTHERM_00050570	NA	NA
IR_HP_MMS	TTHERM_00659010	NA	NA
IR_HP_UV	TTHERM_00194040	NA	NA
IR_HP_CPT	TTHERM_00395710	THD5	HDA1.TTHERM_00395710
IR_MMS_UV	TTHERM_000372529	YNK1.TTHERM_000372529	YNK1.TTHERM_000372529
IR_MMS_CPT	TTHERM_00016510	NA	NA
IR_UV_CPT	TTHERM_00013490	NA	NA
HP_MMS_UV	TTHERM_00052280	CMD1.TTHERM_00052280	CMD1.TTHERM_00052280
HP_MMS_CPT	TTHERM_00584550	UBA5	TCD2.TTHERM_00584550
HP_UV_CPT	TTHERM_000675818	NA	NA
MMS_UV_CPT	TTHERM_000389729	NA	NA
HU_IR	TTHERM_00024240	HCH1.TTHERM_00024240	HCH1.TTHERM_00024240
HU_HP	TTHERM_00151890	YBL036C.TTHERM_00151890	YBL036C.TTHERM_00151890
HU_MMS	TTHERM_000452030	RPF1.TTHERM_000452030	RPF1.TTHERM_000452030
HU_UV	TTHERM_000353439	IST3.TTHERM_000353439	IST3.TTHERM_000353439
HU_CPT	TTHERM_00066920	NA	NA
IR_HP	TTHERM_00120830	NA	NA
IR_MMS	TTHERM_00035180	NA	NA
IR_UV	TTHERM_00006090	NA	NA
IR_CPT	TTHERM_00030050	NA	NA
HP_MMS	TTHERM_00455270	NA	NA
HP_UV	TTHERM_00039110	DYN1.TTHERM_00039110	DYN1.TTHERM_00039110
HP_CPT	TTHERM_00085050	NA	NA
MMS_UV	TTHERM_00031660	NA	NA
MMS_CPT	TTHERM_000193469	NA	NA
UV_CPT	TTHERM_00013230	NA	NA
HU	TTHERM_000137809	NA	NA
IR	TTHERM_000046469	BCY1.TTHERM_000046469	BCY1.TTHERM_000046469
HP	TTHERM_00016280	YML131W.TTHERM_00016280	YML131W.TTHERM_00016280
MMS	TTHERM_000079459	NA	NA
UV	TTHERM_00001150	DUN1.TTHERM_00001150	DUN1.TTHERM_00001150
CPT	TTHERM_00004860	NA	NA
HU_IR_HP_MMS_UV_CPT	TTHERM_001113129	NA	NA
HU_IR_HP_MMS_UV	TTHERM_00580360	NA	NA
HU_IR_HP_MMS_CPT	NA	NA	NA
HU_IR_HP_UV_CPT	TTHERM_00581910	SSK22.TTHERM_00581910	SSK22.TTHERM_00581910
HU_IR_MMS_UV_CPT	TTHERM_00034960	NA	NA
HU_HP_MMS_UV_CPT	TTHERM_00715760	NA	NA
IR_HP_MMS_UV_CPT	TTHERM_00052190	CTH1	PEP4.TTHERM_00052190
HU_IR_HP_MMS	TTHERM_00670500	CCT6	CCT6.TTHERM_00670500
HU_IR_HP_UV	TTHERM_00284140	NA	NA
HU_IR_HP_CPT	NA	NA	NA
HU_IR_MMS_UV	TTHERM_000593080	IMP3.TTHERM_000593080	IMP3.TTHERM_000593080
HU_IR_MMS_CPT	TTHERM_00318820	YDJ1.TTHERM_00318820	YDJ1.TTHERM_00318820
HU_IR_UV_CPT	TTHERM_00127210	NA	NA
HU_HP_MMS_UV	TTHERM_00637490	NOP2.TTHERM_00637490	NOP2.TTHERM_00637490
HU_HP_MMS_CPT	NA	NA	NA
HU_HP_UV_CPT	NA	NA	NA
HU_MMS_UV_CPT	TTHERM_00151230	NA	NA
IR_HP_MMS_UV	TTHERM_00152050	TFB2	SSL1.TTHERM_00152050
IR_HP_MMS_CPT	TTHERM_00335830	NA	NA
IR_HP_UV_CPT	TTHERM_00227260	NA	NA
IR_MMS_UV_CPT	TTHERM_000321729	NA	NA
HP_MMS_UV_CPT	TTHERM_00251120	NA	NA
HU_IR_HP	TTHERM_00787190	NA	NA
HU_IR_MMS	TTHERM_00052420	ASN2.TTHERM_00052420	ASN2.TTHERM_00052420
HU_IR_UV	TTHERM_00037220	NA	NA
HU_IR_CPT	TTHERM_00283270	CYC8.TTHERM_00283270	CYC8.TTHERM_00283270
HU_HP_MMS	TTHERM_00630010	GPX1	GPX2.TTHERM_00630010
HU_HP_UV	TTHERM_00151360	NA	NA
HU_HP_CPT	NA	NA	NA
HU_MMS_UV	TTHERM_00046820	NA	NA
HU_MMS_CPT	TTHERM_00425920	NA	NA
HU_UV_CPT	TTHERM_000730254	NA	NA
IR_HP_MMS	TTHERM_01005120	FZY6	CDH1.TTHERM_01005120
IR_HP_UV	TTHERM_00217200	NA	NA
IR_HP_CPT	TTHERM_00418140	NA	NA
IR_MMS_UV	TTHERM_00039240	HEL1.TTHERM_00039240	HEL1.TTHERM_00039240
IR_MMS_CPT	TTHERM_00030320	MCP2.TTHERM_00030320	MCP2.TTHERM_00030320
IR_UV_CPT	TTHERM_000156699	NA	NA
HP_MMS_UV	TTHERM_001075589	NA	NA
HP_MMS_CPT	TTHERM_00592740	NA	NA
HP_UV_CPT	TTHERM_001034480	NA	NA
MMS_UV_CPT	TTHERM_00039260	NA	NA
HU_IR	TTHERM_000263389	MVP1.TTHERM_000263389	MVP1.TTHERM_000263389
HU_HP	TTHERM_00268040	NUP185	SPC110.TTHERM_00268040
HU_MMS	TTHERM_00046950	NA	NA
HU_UV	TTHERM_00036940	NA	NA
HU_CPT	TTHERM_000770889	NA	NA
IR_HP	TTHERM_00136070	NA	NA
IR_MMS	TTHERM_000401869	NA	NA
IR_UV	TTHERM_00006210	NA	NA
IR_CPT	TTHERM_000300539	KIP1.TTHERM_000300539	KIP1.TTHERM_000300539
HP_MMS	TTHERM_00527110	KAP104	KAP104.TTHERM_00527110
HP_UV	TTHERM_000402210	NA	NA
HP_CPT	TTHERM_00137790	NA	NA
MMS_UV	TTHERM_000382209	NA	NA
MMS_CPT	TTHERM_00023940	NUD1.TTHERM_00023940	NUD1.TTHERM_00023940
UV_CPT	TTHERM_000191059	NA	NA
HU	TTHERM_00015990	NA	NA
IR	TTHERM_000047248	NA	NA
HP	TTHERM_000193549	NA	NA
MMS	TTHERM_00011150	NA	NA
UV	TTHERM_000011599	NA	NA
CPT	TTHERM_00006020	NA	NA
HU_IR_HP_MMS_UV_CPT	TTHERM_00128330	NA	NA
HU_IR_HP_MMS_UV	TTHERM_00588880	RAD3L3	CHL1.TTHERM_00588880
HU_IR_HP_MMS_CPT	NA	NA	NA
HU_IR_HP_UV_CPT	TTHERM_00643520	NA	NA
HU_IR_MMS_UV_CPT	TTHERM_00035240	NA	NA
HU_HP_MMS_UV_CPT	TTHERM_01124100	FAA2.TTHERM_01124100	FAA2.TTHERM_01124100
IR_HP_MMS_UV_CPT	TTHERM_00052670	NA	NA
HU_IR_HP_MMS	TTHERM_00678580	UTP25.TTHERM_00678580	UTP25.TTHERM_00678580
HU_IR_HP_UV	TTHERM_00316560	2002-09-01	CDC10.TTHERM_00316560
HU_IR_HP_CPT	NA	NA	NA
HU_IR_MMS_UV	TTHERM_000666223	NA	NA
HU_IR_MMS_CPT	TTHERM_00433640	SNML1	PSO2.TTHERM_00433640
HU_IR_UV_CPT	TTHERM_00136040	NA	NA
HU_HP_MMS_UV	TTHERM_00637800	UTP14	UTP14.TTHERM_00637800
HU_HP_MMS_CPT	NA	NA	NA
HU_HP_UV_CPT	NA	NA	NA
HU_MMS_UV_CPT	TTHERM_00151670	ADH3.TTHERM_00151670	ADH3.TTHERM_00151670
IR_HP_MMS_UV	TTHERM_00185490	NA	NA
IR_HP_MMS_CPT	TTHERM_00340180	NA	NA
IR_HP_UV_CPT	TTHERM_00241880	YND1.TTHERM_00241880	YND1.TTHERM_00241880
IR_MMS_UV_CPT	TTHERM_000323149	NA	NA
HP_MMS_UV_CPT	TTHERM_00257200	NA	NA
HU_IR_HP	TTHERM_01000200	NA	NA
HU_IR_MMS	TTHERM_00058260	NCP1.TTHERM_00058260	NCP1.TTHERM_00058260
HU_IR_UV	TTHERM_00046550	NA	NA
HU_IR_CPT	TTHERM_00317480	NA	NA
HU_HP_MMS	TTHERM_00670770	BCP1.TTHERM_00670770	BCP1.TTHERM_00670770
HU_HP_UV	TTHERM_00209320	NA	NA
HU_HP_CPT	NA	NA	NA
HU_MMS_UV	TTHERM_00047460	MAK16.TTHERM_00047460	MAK16.TTHERM_00047460
HU_MMS_CPT	TTHERM_00439110	NA	NA
HU_UV_CPT	TTHERM_000734139	NA	NA
IR_HP_MMS	NA	NA	NA
IR_HP_UV	TTHERM_00241870	GDA1.TTHERM_00241870	GDA1.TTHERM_00241870
IR_HP_CPT	TTHERM_00476930	NA	NA
IR_MMS_UV	TTHERM_00044990	NA	NA
IR_MMS_CPT	TTHERM_000312029	NA	NA
IR_UV_CPT	TTHERM_00024080	YCF1.TTHERM_00024080	YCF1.TTHERM_00024080
HP_MMS_UV	TTHERM_00122310	NA	NA
HP_MMS_CPT	TTHERM_00691780	NA	NA
HP_UV_CPT	TTHERM_00161570	SNF1.TTHERM_00161570	SNF1.TTHERM_00161570
MMS_UV_CPT	TTHERM_00046480	ENO2	ENO1.TTHERM_00046480
HU_IR	TTHERM_000446568	YPL183W.TTHERM_000446568	YPL183W.TTHERM_000446568
HU_HP	TTHERM_00274520	GRE3.TTHERM_00274520	GRE3.TTHERM_00274520
HU_MMS	TTHERM_00047160	NSI1.TTHERM_00047160	NSI1.TTHERM_00047160
HU_UV	TTHERM_00036980	DRH6	RRP3.TTHERM_00036980
HU_CPT	TTHERM_00077290	TTLL6E	PBY1.TTHERM_00077290
IR_HP	TTHERM_00136420	SLX8.TTHERM_00136420	SLX8.TTHERM_00136420
IR_MMS	TTHERM_00049350	NA	NA
IR_UV	TTHERM_000085349	NA	NA
IR_CPT	TTHERM_00030200	NA	NA
HP_MMS	TTHERM_00527390	NA	NA
HP_UV	TTHERM_00047590	NA	NA
HP_CPT	TTHERM_00140840	NA	NA
MMS_UV	TTHERM_00049080	POB3	POB3.TTHERM_00049080
MMS_CPT	TTHERM_00024410	NA	NA
UV_CPT	TTHERM_000251049	NA	NA
HU	TTHERM_00016120	NA	NA
IR	TTHERM_000047754	NA	NA
HP	TTHERM_000246969	NA	NA
MMS	TTHERM_00011270	NA	NA
UV	TTHERM_00001160	NA	NA
CPT	TTHERM_00006250	NA	NA
HU_IR_HP_MMS_UV_CPT	TTHERM_00160920	NA	NA
HU_IR_HP_MMS_UV	TTHERM_00628420	NOP7	NOP7.TTHERM_00628420
HU_IR_HP_MMS_CPT	NA	NA	NA
HU_IR_HP_UV_CPT	TTHERM_00691750	NA	NA
HU_IR_MMS_UV_CPT	TTHERM_00035330	YOL075C.TTHERM_00035330	YOL075C.TTHERM_00035330
HU_HP_MMS_UV_CPT	NA	NA	NA
IR_HP_MMS_UV_CPT	TTHERM_00066830	CBSB1	NA
HU_IR_HP_MMS	TTHERM_00760640	NA	NA
HU_IR_HP_UV	TTHERM_00389860	NA	NA
HU_IR_HP_CPT	NA	NA	NA
HU_IR_MMS_UV	TTHERM_00069230	SMY1.TTHERM_00069230	SMY1.TTHERM_00069230
HU_IR_MMS_CPT	TTHERM_00564300	NA	NA
HU_IR_UV_CPT	TTHERM_00143770	IPP1.TTHERM_00143770	IPP1.TTHERM_00143770
HU_HP_MMS_UV	TTHERM_00940340	NA	NA
HU_HP_MMS_CPT	NA	NA	NA
HU_HP_UV_CPT	NA	NA	NA
HU_MMS_UV_CPT	TTHERM_00189180	HHT2	HHT2.TTHERM_00189180
IR_HP_MMS_UV	TTHERM_00216140	TOP3.TTHERM_00216140	TOP3.TTHERM_00216140
IR_HP_MMS_CPT	TTHERM_00378890	GRL5	NA
IR_HP_UV_CPT	TTHERM_00259630	NA	NA
IR_MMS_UV_CPT	TTHERM_000348879	NA	NA
HP_MMS_UV_CPT	TTHERM_00300290	NA	NA
HU_IR_HP	NA	NA	NA
HU_IR_MMS	TTHERM_000584709	KIN28.TTHERM_000584709	KIN28.TTHERM_000584709
HU_IR_UV	TTHERM_000476849	NA	NA
HU_IR_CPT	TTHERM_00378470	NA	NA
HU_HP_MMS	TTHERM_01608700	RIX7.TTHERM_01608700	RIX7.TTHERM_01608700
HU_HP_UV	TTHERM_00248430	RRM6	NOP15.TTHERM_00248430
HU_HP_CPT	NA	NA	NA
HU_MMS_UV	TTHERM_00049190	NA	NA
HU_MMS_CPT	TTHERM_00449180	NA	NA
HU_UV_CPT	TTHERM_00080010	NA	NA
IR_HP_MMS	NA	NA	NA
IR_HP_UV	TTHERM_00328640	NA	NA
IR_HP_CPT	TTHERM_00476940	NA	NA
IR_MMS_UV	TTHERM_000452019	NA	NA
IR_MMS_CPT	TTHERM_00038880	CCF9	NA
IR_UV_CPT	TTHERM_00030090	CHL1.TTHERM_00030090	CHL1.TTHERM_00030090
HP_MMS_UV	TTHERM_00136330	MXR2	MXR2.TTHERM_00136330
HP_MMS_CPT	TTHERM_00695600	NA	NA
HP_UV_CPT	TTHERM_00185730	SYM1.TTHERM_00185730	SYM1.TTHERM_00185730
MMS_UV_CPT	TTHERM_000486279	NA	NA
HU_IR	TTHERM_000456809	NA	NA
HU_HP	TTHERM_00309940	SDS22.TTHERM_00309940	SDS22.TTHERM_00309940
HU_MMS	TTHERM_00050590	NOP58.TTHERM_00050590	NOP58.TTHERM_00050590
HU_UV	TTHERM_00037410	NA	NA
HU_CPT	TTHERM_00077599	YCR102C.TTHERM_00077599	YCR102C.TTHERM_00077599
IR_HP	TTHERM_00137650	NA	NA
IR_MMS	TTHERM_000715791	GYP5.TTHERM_000715791	GYP5.TTHERM_000715791
IR_UV	TTHERM_00008690	NA	NA
IR_CPT	TTHERM_000304319	NA	NA
HP_MMS	TTHERM_00543590	EPK1	STE7.TTHERM_00543590
HP_UV	TTHERM_000477071	NA	NA
HP_CPT	TTHERM_00140890	NA	NA
MMS_UV	TTHERM_00052630	NA	NA
MMS_CPT	TTHERM_000248530	NA	NA
UV_CPT	TTHERM_000279829	HYR1.TTHERM_000279829	HYR1.TTHERM_000279829
HU	TTHERM_00016270	MRPL51.TTHERM_00016270	MRPL51.TTHERM_00016270
IR	TTHERM_000058639	NA	NA
HP	TTHERM_000285419	NA	NA
MMS	TTHERM_00011540	SPS19.TTHERM_00011540	SPS19.TTHERM_00011540
UV	TTHERM_00001190	NA	NA
CPT	TTHERM_00008560	NA	NA
HU_IR_HP_MMS_UV_CPT	TTHERM_00194130	MMS4	NA
HU_IR_HP_MMS_UV	TTHERM_00637550	CSR1.TTHERM_00637550	CSR1.TTHERM_00637550
HU_IR_HP_MMS_CPT	NA	NA	NA
HU_IR_HP_UV_CPT	TTHERM_01027550	NA	NA
HU_IR_MMS_UV_CPT	TTHERM_000487089	NA	NA
HU_HP_MMS_UV_CPT	NA	NA	NA
IR_HP_MMS_UV_CPT	TTHERM_000697499	SNM1	PSO2.TTHERM_000697499
HU_IR_HP_MMS	NA	NA	NA
HU_IR_HP_UV	TTHERM_00448630	NA	NA
HU_IR_HP_CPT	NA	NA	NA
HU_IR_MMS_UV	TTHERM_00069260	NA	NA
HU_IR_MMS_CPT	TTHERM_00727510	NA	NA
HU_IR_UV_CPT	TTHERM_00246970	NA	NA
HU_HP_MMS_UV	TTHERM_01053020	UBC9.TTHERM_01053020	UBC9.TTHERM_01053020
HU_HP_MMS_CPT	NA	NA	NA
HU_HP_UV_CPT	NA	NA	NA
HU_MMS_UV_CPT	TTHERM_00191110	TIF5.TTHERM_00191110	TIF5.TTHERM_00191110
IR_HP_MMS_UV	TTHERM_00218620	MDV1.TTHERM_00218620	MDV1.TTHERM_00218620
IR_HP_MMS_CPT	TTHERM_00440600	NA	NA
IR_HP_UV_CPT	TTHERM_00283350	NA	NA
IR_MMS_UV_CPT	TTHERM_000391439	NA	NA
HP_MMS_UV_CPT	TTHERM_00313130	SOR4	PEP1.TTHERM_00313130
HU_IR_HP	NA	NA	NA
HU_IR_MMS	TTHERM_00059210	CDS1.TTHERM_00059210	CDS1.TTHERM_00059210
HU_IR_UV	TTHERM_00052260	MDH3	MDH2.TTHERM_00052260
HU_IR_CPT	TTHERM_00394690	SCH9.TTHERM_00394690	SCH9.TTHERM_00394690
HU_HP_MMS	NA	NA	NA
HU_HP_UV	TTHERM_00390200	NA	NA
HU_HP_CPT	NA	NA	NA
HU_MMS_UV	TTHERM_00049209	NA	NA
HU_MMS_CPT	TTHERM_00449590	NA	NA
HU_UV_CPT	TTHERM_00101520	NA	NA
IR_HP_MMS	NA	NA	NA
IR_HP_UV	TTHERM_00338210	RPL18	NA
IR_HP_CPT	TTHERM_00530000	NA	NA
IR_MMS_UV	TTHERM_00047490	MRNC60	NA
IR_MMS_CPT	TTHERM_00039230	CDC14.TTHERM_00039230	CDC14.TTHERM_00039230
IR_UV_CPT	TTHERM_000317039	NA	NA
HP_MMS_UV	TTHERM_00142230	MSH6.TTHERM_00142230	MSH6.TTHERM_00142230
HP_MMS_CPT	TTHERM_00794510	NA	NA
HP_UV_CPT	TTHERM_00241930	NAM7.TTHERM_00241930	NAM7.TTHERM_00241930
MMS_UV_CPT	TTHERM_00049330	TSA1.TTHERM_00049330	TSA1.TTHERM_00049330
HU_IR	TTHERM_00047400	CVP1	NA
HU_HP	TTHERM_00363190	NA	NA
HU_MMS	TTHERM_00052310	AAC1	PET9.TTHERM_00052310
HU_UV	TTHERM_000411799	NA	NA
HU_CPT	TTHERM_00120980	GLO2.TTHERM_00120980	GLO2.TTHERM_00120980
IR_HP	TTHERM_00137720	NA	NA
IR_MMS	TTHERM_00074320	GPH1.TTHERM_00074320	GPH1.TTHERM_00074320
IR_UV	TTHERM_00011440	YOL057W.TTHERM_00011440	YOL057W.TTHERM_00011440
IR_CPT	TTHERM_000312849	NA	NA
HP_MMS	TTHERM_00623050	LC3B	TRX1.TTHERM_00623050
HP_UV	TTHERM_00049170	NA	NA
HP_CPT	TTHERM_00160990	DNM1.TTHERM_00160990	DNM1.TTHERM_00160990
MMS_UV	TTHERM_000526907	NA	NA
MMS_CPT	TTHERM_000268328	CYC8.TTHERM_000268328	CYC8.TTHERM_000268328
UV_CPT	TTHERM_00028520	NA	NA
HU	TTHERM_000189309	NA	NA
IR	TTHERM_00006050	NA	NA
HP	TTHERM_00030570	NA	NA
MMS	TTHERM_00013890	ROT2.TTHERM_00013890	ROT2.TTHERM_00013890
UV	TTHERM_00001200	HXT7.TTHERM_00001200	HXT7.TTHERM_00001200
CPT	TTHERM_00008620	NA	NA
HU_IR_HP_MMS_UV_CPT	TTHERM_00204140	NA	NA
HU_IR_HP_MMS_UV	TTHERM_00648930	CLU1.TTHERM_00648930	CLU1.TTHERM_00648930
HU_IR_HP_MMS_CPT	NA	NA	NA
HU_IR_HP_UV_CPT	NA	NA	NA
HU_IR_MMS_UV_CPT	TTHERM_00049360	NA	NA
HU_HP_MMS_UV_CPT	NA	NA	NA
IR_HP_MMS_UV_CPT	TTHERM_00088010	AFA1	YTA6.TTHERM_00088010
HU_IR_HP_MMS	NA	NA	NA
HU_IR_HP_UV	TTHERM_00449240	YKL091C.TTHERM_00449240	YKL091C.TTHERM_00449240
HU_IR_HP_CPT	NA	NA	NA
HU_IR_MMS_UV	TTHERM_00077220	YTM1.TTHERM_00077220	YTM1.TTHERM_00077220
HU_IR_MMS_CPT	TTHERM_00823790	NA	NA
HU_IR_UV_CPT	TTHERM_00250920	NA	NA
HU_HP_MMS_UV	TTHERM_01109790	NA	NA
HU_HP_MMS_CPT	NA	NA	NA
HU_HP_UV_CPT	NA	NA	NA
HU_MMS_UV_CPT	TTHERM_00227800	ADK1.TTHERM_00227800	ADK1.TTHERM_00227800
IR_HP_MMS_UV	TTHERM_00274620	GST22	NA
IR_HP_MMS_CPT	TTHERM_00471040	CCF8	NA
IR_HP_UV_CPT	TTHERM_00301690	NA	NA
IR_MMS_UV_CPT	TTHERM_00046840	NA	NA
HP_MMS_UV_CPT	TTHERM_00355140	NA	NA
HU_IR_HP	NA	NA	NA
HU_IR_MMS	TTHERM_00059480	AMD2.TTHERM_00059480	AMD2.TTHERM_00059480
HU_IR_UV	TTHERM_00069400	NPL4.TTHERM_00069400	NPL4.TTHERM_00069400
HU_IR_CPT	TTHERM_00444730	NA	NA
HU_HP_MMS	NA	NA	NA
HU_HP_UV	TTHERM_00402010	HRT3.TTHERM_00402010	HRT3.TTHERM_00402010
HU_HP_CPT	NA	NA	NA
HU_MMS_UV	TTHERM_000522689	SFM1.TTHERM_000522689	SFM1.TTHERM_000522689
HU_MMS_CPT	TTHERM_00449750	NA	NA
HU_UV_CPT	TTHERM_00125220	NA	NA
IR_HP_MMS	NA	NA	NA
IR_HP_UV	TTHERM_00343480	NA	NA
IR_HP_CPT	TTHERM_00691320	CST9.TTHERM_00691320	CST9.TTHERM_00691320
IR_MMS_UV	TTHERM_00052520	NA	NA
IR_MMS_CPT	TTHERM_000420398	NA	NA
IR_UV_CPT	TTHERM_00031750	NA	NA
HP_MMS_UV	TTHERM_00188780	CDC27.TTHERM_00188780	CDC27.TTHERM_00188780
HP_MMS_CPT	TTHERM_00799200	NA	NA
HP_UV_CPT	TTHERM_00316000	NA	NA
MMS_UV_CPT	TTHERM_000503751	NA	NA
HU_IR	TTHERM_000570549	HHT1	HHT2.TTHERM_000570549
HU_HP	TTHERM_00418059	NA	NA
HU_MMS	TTHERM_00069270	KRR1.TTHERM_00069270	KRR1.TTHERM_00069270
HU_UV	TTHERM_00043790	NA	NA
HU_CPT	TTHERM_00144960	NA	NA
IR_HP	TTHERM_00151490	NA	NA
IR_MMS	TTHERM_000798148	NA	NA
IR_UV	TTHERM_000127249	NA	NA
IR_CPT	TTHERM_00035000	NA	NA
HP_MMS	TTHERM_00841270	NA	NA
HP_UV	TTHERM_000495990	NA	NA
HP_CPT	TTHERM_00194310	MDN1.TTHERM_00194310	MDN1.TTHERM_00194310
MMS_UV	TTHERM_000529532	NA	NA
MMS_CPT	TTHERM_000283478	NA	NA
UV_CPT	TTHERM_00031790	YOL075C.TTHERM_00031790	YOL075C.TTHERM_00031790
HU	TTHERM_000198259	NA	NA
IR	TTHERM_00006130	NA	NA
HP	TTHERM_000320339	NA	NA
MMS	TTHERM_000140792	NA	NA
UV	TTHERM_00001240	NA	NA
CPT	TTHERM_000086849	NA	NA
HU_IR_HP_MMS_UV_CPT	TTHERM_00237490	RAD54	RAD54.TTHERM_00237490
HU_IR_HP_MMS_UV	TTHERM_00656060	NA	NA
HU_IR_HP_MMS_CPT	NA	NA	NA
HU_IR_HP_UV_CPT	NA	NA	NA
HU_IR_MMS_UV_CPT	TTHERM_00050530	NA	NA
HU_HP_MMS_UV_CPT	NA	NA	NA
IR_HP_MMS_UV_CPT	TTHERM_00106890	RFA1	RFA1.TTHERM_00106890
HU_IR_HP_MMS	NA	NA	NA
HU_IR_HP_UV	TTHERM_00470530	NMD3	NMD3.TTHERM_00470530
HU_IR_HP_CPT	NA	NA	NA
HU_IR_MMS_UV	TTHERM_00077780	UTP5.TTHERM_00077780	UTP5.TTHERM_00077780
HU_IR_MMS_CPT	TTHERM_00836620	SGT2.TTHERM_00836620	SGT2.TTHERM_00836620
HU_IR_UV_CPT	TTHERM_00264940	GTR1.TTHERM_00264940	GTR1.TTHERM_00264940
HU_HP_MMS_UV	TTHERM_01262850	FAP251	CMD1.TTHERM_01262850
HU_HP_MMS_CPT	NA	NA	NA
HU_HP_UV_CPT	NA	NA	NA
HU_MMS_UV_CPT	TTHERM_00268060	CTH110	NA
IR_HP_MMS_UV	TTHERM_00357060	NA	NA
IR_HP_MMS_CPT	TTHERM_00473020	GRL2	NA
IR_HP_UV_CPT	TTHERM_00410140	KIP3.TTHERM_00410140	KIP3.TTHERM_00410140
IR_MMS_UV_CPT	TTHERM_00047750	NA	NA
HP_MMS_UV_CPT	TTHERM_00439070	NA	NA
HU_IR_HP	NA	NA	NA
HU_IR_MMS	TTHERM_00077790	GIM4.TTHERM_00077790	GIM4.TTHERM_00077790
HU_IR_UV	TTHERM_000786968	AAP1.TTHERM_000786968	AAP1.TTHERM_000786968
HU_IR_CPT	TTHERM_00459260	TRX2.TTHERM_00459260	TRX2.TTHERM_00459260
HU_HP_MMS	NA	NA	NA
HU_HP_UV	TTHERM_00469080	NA	NA
HU_HP_CPT	NA	NA	NA
HU_MMS_UV	TTHERM_000578959	RRP36.TTHERM_000578959	RRP36.TTHERM_000578959
HU_MMS_CPT	TTHERM_00502680	NA	NA
HU_UV_CPT	TTHERM_00219050	MXR1	MXR1.TTHERM_00219050
IR_HP_MMS	NA	NA	NA
IR_HP_UV	TTHERM_00344080	BPT1.TTHERM_00344080	BPT1.TTHERM_00344080
IR_HP_CPT	TTHERM_00825120	APC2	APC2.TTHERM_00825120
IR_MMS_UV	TTHERM_00053800	DLD1.TTHERM_00053800	DLD1.TTHERM_00053800
IR_MMS_CPT	TTHERM_000455599	NA	NA
IR_UV_CPT	TTHERM_000348809	NA	NA
HP_MMS_UV	TTHERM_00188850	CDC5.TTHERM_00188850	CDC5.TTHERM_00188850
HP_MMS_CPT	TTHERM_00942750	TTLL10B	PBY1.TTHERM_00942750
HP_UV_CPT	TTHERM_00355050	TIF11.TTHERM_00355050	TIF11.TTHERM_00355050
MMS_UV_CPT	TTHERM_000530149	GPD1.TTHERM_000530149	GPD1.TTHERM_000530149
HU_IR	TTHERM_00058560	NA	NA
HU_HP	TTHERM_00454060	NA	NA
HU_MMS	TTHERM_000756448	NA	NA
HU_UV	TTHERM_000460539	TIS11.TTHERM_000460539	TIS11.TTHERM_000460539
HU_CPT	TTHERM_00149799	HSL1.TTHERM_00149799	HSL1.TTHERM_00149799
IR_HP	TTHERM_00193960	GCD7.TTHERM_00193960	GCD7.TTHERM_00193960
IR_MMS	TTHERM_000825239	NA	NA
IR_UV	TTHERM_00013130	NA	NA
IR_CPT	TTHERM_00039250	NA	NA
HP_MMS	TTHERM_00859320	PSD1.TTHERM_00859320	PSD1.TTHERM_00859320
HP_UV	TTHERM_00051940	NA	NA
HP_CPT	TTHERM_00256860	NA	NA
MMS_UV	TTHERM_000561429	NA	NA
MMS_CPT	TTHERM_000420919	NA	NA
UV_CPT	TTHERM_00031800	YOL075C.TTHERM_00031800	YOL075C.TTHERM_00031800
HU	TTHERM_00028530	ZTA1.TTHERM_00028530	ZTA1.TTHERM_00028530
IR	TTHERM_000074329	NA	NA
HP	TTHERM_000328629	NA	NA
MMS	TTHERM_000160999	YNK1.TTHERM_000160999	YNK1.TTHERM_000160999
UV	TTHERM_000023979	NA	NA
CPT	TTHERM_00010990	NA	NA
HU_IR_HP_MMS_UV_CPT	TTHERM_00237580	NA	NA
HU_IR_HP_MMS_UV	TTHERM_00657460	RRM40	NOP4.TTHERM_00657460
HU_IR_HP_MMS_CPT	NA	NA	NA
HU_IR_HP_UV_CPT	NA	NA	NA
HU_IR_MMS_UV_CPT	TTHERM_00052620	OLE2	OLE1.TTHERM_00052620
HU_HP_MMS_UV_CPT	NA	NA	NA
IR_HP_MMS_UV_CPT	TTHERM_001205271	NA	NA
HU_IR_HP_MMS	NA	NA	NA
HU_IR_HP_UV	TTHERM_00490850	NA	NA
HU_IR_HP_CPT	NA	NA	NA
HU_IR_MMS_UV	TTHERM_00094210	RPC5	RPC40.TTHERM_00094210
HU_IR_MMS_CPT	TTHERM_00898240	DUG2.TTHERM_00898240	DUG2.TTHERM_00898240
HU_IR_UV_CPT	TTHERM_00284010	YNL320W.TTHERM_00284010	YNL320W.TTHERM_00284010
HU_HP_MMS_UV	NA	NA	NA
HU_HP_MMS_CPT	NA	NA	NA
HU_HP_UV_CPT	NA	NA	NA
HU_MMS_UV_CPT	TTHERM_00279940	NA	NA
IR_HP_MMS_UV	TTHERM_00384910	CEN1	CDC31.TTHERM_00384910
IR_HP_MMS_CPT	TTHERM_00516440	GST27	NA
IR_HP_UV_CPT	TTHERM_00441710	NA	NA
IR_MMS_UV_CPT	TTHERM_00051690	NA	NA
HP_MMS_UV_CPT	TTHERM_00474890	NA	NA
HU_IR_HP	NA	NA	NA
HU_IR_MMS	TTHERM_00138080	FIB1	NOP1.TTHERM_00138080
HU_IR_UV	TTHERM_00083310	FAA2.TTHERM_00083310	FAA2.TTHERM_00083310
HU_IR_CPT	TTHERM_00470620	PNC1.TTHERM_00470620	PNC1.TTHERM_00470620
HU_HP_MMS	NA	NA	NA
HU_HP_UV	TTHERM_00503780	NA	NA
HU_HP_CPT	NA	NA	NA
HU_MMS_UV	TTHERM_00058259	GRE3.TTHERM_00058259	GRE3.TTHERM_00058259
HU_MMS_CPT	TTHERM_00537220	AVT4.TTHERM_00537220	AVT4.TTHERM_00537220
HU_UV_CPT	TTHERM_00227360	NA	NA
IR_HP_MMS	NA	NA	NA
IR_HP_UV	TTHERM_00348600	NA	NA
IR_HP_CPT	TTHERM_00971980	NA	NA
IR_MMS_UV	TTHERM_00058590	FBP1	FBP1.TTHERM_00058590
IR_MMS_CPT	TTHERM_00048930	NA	NA
IR_UV_CPT	TTHERM_000442919	SNF1.TTHERM_000442919	SNF1.TTHERM_000442919
HP_MMS_UV	TTHERM_00189310	NA	NA
HP_MMS_CPT	TTHERM_00947480	NA	NA
HP_UV_CPT	TTHERM_00398070	NA	NA
MMS_UV_CPT	TTHERM_000538899	NA	NA
HU_IR	TTHERM_00058570	NA	NA
HU_HP	TTHERM_00499420	TGP1	NA
HU_MMS	TTHERM_00081110	HLJ1.TTHERM_00081110	HLJ1.TTHERM_00081110
HU_UV	TTHERM_00049120	ESF1.TTHERM_00049120	ESF1.TTHERM_00049120
HU_CPT	TTHERM_00160790	EFM1.TTHERM_00160790	EFM1.TTHERM_00160790
IR_HP	TTHERM_00194510	BOL3.TTHERM_00194510	BOL3.TTHERM_00194510
IR_MMS	TTHERM_00083500	CTH47	NA
IR_UV	TTHERM_00013290	RAD23	RAD23.TTHERM_00013290
IR_CPT	TTHERM_000420396	NA	NA
HP_MMS	TTHERM_00912290	DYH7	DYN1.TTHERM_00912290
HP_UV	TTHERM_00053740	NA	NA
HP_CPT	TTHERM_00295670	CRG1.TTHERM_00295670	CRG1.TTHERM_00295670
MMS_UV	TTHERM_00059190	CDC31.TTHERM_00059190	CDC31.TTHERM_00059190
MMS_CPT	TTHERM_00046130	NA	NA
UV_CPT	TTHERM_00032870	YOL075C.TTHERM_00032870	YOL075C.TTHERM_00032870
HU	TTHERM_000379123	NA	NA
IR	TTHERM_000083508	CKS1.TTHERM_000083508	CKS1.TTHERM_000083508
HP	TTHERM_000331066	NA	NA
MMS	TTHERM_000163949	NA	NA
UV	TTHERM_000028467	NA	NA
CPT	TTHERM_00011030	NA	NA
HU_IR_HP_MMS_UV_CPT	TTHERM_00241610	NA	NA
HU_IR_HP_MMS_UV	TTHERM_00755820	NA	NA
HU_IR_HP_MMS_CPT	NA	NA	NA
HU_IR_HP_UV_CPT	NA	NA	NA
HU_IR_MMS_UV_CPT	TTHERM_000661568	NA	NA
HU_HP_MMS_UV_CPT	NA	NA	NA
IR_HP_MMS_UV_CPT	TTHERM_00128280	NA	NA
HU_IR_HP_MMS	NA	NA	NA
HU_IR_HP_UV	TTHERM_00494070	ADA2.TTHERM_00494070	ADA2.TTHERM_00494070
HU_IR_HP_CPT	NA	NA	NA
HU_IR_MMS_UV	TTHERM_00095530	DRH10	RRP3.TTHERM_00095530
HU_IR_MMS_CPT	TTHERM_00962200	Imp_6	NMD5.TTHERM_00962200
HU_IR_UV_CPT	TTHERM_00316520	NA	NA
HU_HP_MMS_UV	NA	NA	NA
HU_HP_MMS_CPT	NA	NA	NA
HU_HP_UV_CPT	NA	NA	NA
HU_MMS_UV_CPT	TTHERM_00283180	HTB2	HTB1.TTHERM_00283180
IR_HP_MMS_UV	TTHERM_00411740	CBR1.TTHERM_00411740	CBR1.TTHERM_00411740
IR_HP_MMS_CPT	TTHERM_00530200	NA	NA
IR_HP_UV_CPT	TTHERM_00483520	NA	NA
IR_MMS_UV_CPT	TTHERM_000522989	NA	NA
HP_MMS_UV_CPT	TTHERM_00485940	CYC8.TTHERM_00485940	CYC8.TTHERM_00485940
HU_IR_HP	NA	NA	NA
HU_IR_MMS	TTHERM_00158520	HSP82	HSP82.TTHERM_00158520
HU_IR_UV	TTHERM_00086920	NA	NA
HU_IR_CPT	TTHERM_00494180	NA	NA
HU_HP_MMS	NA	NA	NA
HU_HP_UV	TTHERM_00537160	NA	NA
HU_HP_CPT	NA	NA	NA
HU_MMS_UV	TTHERM_00058550	SSC1.TTHERM_00058550	SSC1.TTHERM_00058550
HU_MMS_CPT	TTHERM_00594110	AIM2.TTHERM_00594110	AIM2.TTHERM_00594110
HU_UV_CPT	TTHERM_00249630	NA	NA
IR_HP_MMS	NA	NA	NA
IR_HP_UV	TTHERM_00372500	DRH37	PRP16.TTHERM_00372500
IR_HP_CPT	NA	NA	NA
IR_MMS_UV	TTHERM_00059140	NA	NA
IR_MMS_CPT	TTHERM_000592676	NA	NA
IR_UV_CPT	TTHERM_00047300	NA	NA
HP_MMS_UV	TTHERM_00248520	SSK22.TTHERM_00248520	SSK22.TTHERM_00248520
HP_MMS_CPT	TTHERM_01351060	NA	NA
HP_UV_CPT	TTHERM_00420540	NA	NA
MMS_UV_CPT	TTHERM_000572179	NA	NA
HU_IR	TTHERM_000723629	GLR1.TTHERM_000723629	GLR1.TTHERM_000723629
HU_HP	TTHERM_00518500	NA	NA
HU_MMS	TTHERM_001107329	NA	NA
HU_UV	TTHERM_00052430	YER007C.TTHERM_00052430	YER007C.TTHERM_00052430
HU_CPT	TTHERM_00218280	TRM3	TRM3.TTHERM_00218280
IR_HP	TTHERM_00196320	DRH27	PRP22.TTHERM_00196320
IR_MMS	TTHERM_00105410	NA	NA
IR_UV	TTHERM_00014920	KIN8	KAR3.TTHERM_00014920
IR_CPT	TTHERM_000446269	IRC20.TTHERM_000446269	IRC20.TTHERM_000446269
HP_MMS	TTHERM_01276420	DYH3	DYN1.TTHERM_01276420
HP_UV	TTHERM_00053900	NA	NA
HP_CPT	TTHERM_00295970	NA	NA
MMS_UV	TTHERM_00059350	SOD1.TTHERM_00059350	SOD1.TTHERM_00059350
MMS_CPT	TTHERM_00047330	NA	NA
UV_CPT	TTHERM_00035170	NA	NA
HU	TTHERM_000401999	NA	NA
IR	TTHERM_00008660	NA	NA
HP	TTHERM_00035580	SEC61.TTHERM_00035580	SEC61.TTHERM_00035580
MMS	TTHERM_00023950	DYN2.TTHERM_00023950	DYN2.TTHERM_00023950
UV	TTHERM_000028468	NA	NA
CPT	TTHERM_000113089	NA	NA
HU_IR_HP_MMS_UV_CPT	TTHERM_00249600	NA	NA
HU_IR_HP_MMS_UV	TTHERM_00808010	NA	NA
HU_IR_HP_MMS_CPT	NA	NA	NA
HU_IR_HP_UV_CPT	NA	NA	NA
HU_IR_MMS_UV_CPT	TTHERM_00069250	NA	NA
HU_HP_MMS_UV_CPT	NA	NA	NA
IR_HP_MMS_UV_CPT	TTHERM_00128620	UDH4	SRS2.TTHERM_00128620
HU_IR_HP_MMS	NA	NA	NA
HU_IR_HP_UV	TTHERM_00571870	YBR062C.TTHERM_00571870	YBR062C.TTHERM_00571870
HU_IR_HP_CPT	NA	NA	NA
HU_IR_MMS_UV	TTHERM_00101480	RCL1.TTHERM_00101480	RCL1.TTHERM_00101480
HU_IR_MMS_CPT	TTHERM_01216095	KIP3.TTHERM_01216095	KIP3.TTHERM_01216095
HU_IR_UV_CPT	TTHERM_00320020	ABC10	BPT1.TTHERM_00320020
HU_HP_MMS_UV	NA	NA	NA
HU_HP_MMS_CPT	NA	NA	NA
HU_HP_UV_CPT	NA	NA	NA
HU_MMS_UV_CPT	TTHERM_00305480	NA	NA
IR_HP_MMS_UV	TTHERM_00449580	NA	NA
IR_HP_MMS_CPT	TTHERM_00537380	NA	NA
IR_HP_UV_CPT	TTHERM_00558650	NA	NA
IR_MMS_UV_CPT	TTHERM_00058960	NA	NA
HP_MMS_UV_CPT	TTHERM_00486600	DYH5	DYN1.TTHERM_00486600
HU_IR_HP	NA	NA	NA
HU_IR_MMS	TTHERM_00196340	NA	NA
HU_IR_UV	TTHERM_00094160	NA	NA
HU_IR_CPT	TTHERM_00529470	STE6.TTHERM_00529470	STE6.TTHERM_00529470
HU_HP_MMS	NA	NA	NA
HU_HP_UV	TTHERM_00586800	NA	NA
HU_HP_CPT	NA	NA	NA
HU_MMS_UV	TTHERM_000765400	NA	NA
HU_MMS_CPT	TTHERM_00633360	HTB1	HTB1.TTHERM_00633360
HU_UV_CPT	TTHERM_00295770	NA	NA
IR_HP_MMS	NA	NA	NA
IR_HP_UV	TTHERM_00373700	NA	NA
IR_HP_CPT	NA	NA	NA
IR_MMS_UV	TTHERM_00077380	NA	NA
IR_MMS_CPT	TTHERM_00059370	NA	NA
IR_UV_CPT	TTHERM_000492363	NA	NA
HP_MMS_UV	TTHERM_00334410	NA	NA
HP_MMS_CPT	NA	NA	NA
HP_UV_CPT	TTHERM_00472010	NA	NA
MMS_UV_CPT	TTHERM_00058420	NA	NA
HU_IR	TTHERM_000773209	NA	NA
HU_HP	TTHERM_00802310	NA	NA
HU_MMS	TTHERM_00123730	NA	NA
HU_UV	TTHERM_00059150	NA	NA
HU_CPT	TTHERM_00221020	ART1	LYS2.TTHERM_00221020
IR_HP	TTHERM_00274530	NA	NA
IR_MMS	TTHERM_00105450	KGD2.TTHERM_00105450	KGD2.TTHERM_00105450
IR_UV	TTHERM_000152189	NA	NA
IR_CPT	TTHERM_000455598	SYM1.TTHERM_000455598	SYM1.TTHERM_000455598
HP_MMS	TTHERM_01287970	NDP1	CYR1.TTHERM_01287970
HP_UV	TTHERM_00059280	IRC20.TTHERM_00059280	IRC20.TTHERM_00059280
HP_CPT	TTHERM_00437780	NA	NA
MMS_UV	TTHERM_000654019	NA	NA
MMS_CPT	TTHERM_00047430	ETP1.TTHERM_00047430	ETP1.TTHERM_00047430
UV_CPT	TTHERM_00036880	NA	NA
HU	TTHERM_000404309	NA	NA
IR	TTHERM_000086929	NA	NA
HP	TTHERM_00035700	NA	NA
MMS	TTHERM_00024380	NA	NA
UV	TTHERM_000028908	NA	NA
CPT	TTHERM_00011660	NA	NA
HU_IR_HP_MMS_UV_CPT	TTHERM_00277480	NA	NA
HU_IR_HP_MMS_UV	TTHERM_00826900	TAF5.TTHERM_00826900	TAF5.TTHERM_00826900
HU_IR_HP_MMS_CPT	NA	NA	NA
HU_IR_HP_UV_CPT	NA	NA	NA
HU_IR_MMS_UV_CPT	TTHERM_000694478	NA	NA
HU_HP_MMS_UV_CPT	NA	NA	NA
IR_HP_MMS_UV_CPT	TTHERM_00136030	DNA2	DNA2.TTHERM_00136030
HU_IR_HP_MMS	NA	NA	NA
HU_IR_HP_UV	TTHERM_00616330	YVH1.TTHERM_00616330	YVH1.TTHERM_00616330
HU_IR_HP_CPT	NA	NA	NA
HU_IR_MMS_UV	TTHERM_001106138	NA	NA
HU_IR_MMS_CPT	NA	NA	NA
HU_IR_UV_CPT	TTHERM_00334560	ELM1.TTHERM_00334560	ELM1.TTHERM_00334560
HU_HP_MMS_UV	NA	NA	NA
HU_HP_MMS_CPT	NA	NA	NA
HU_HP_UV_CPT	NA	NA	NA
HU_MMS_UV_CPT	TTHERM_00316500	HTA2	HTA1.TTHERM_00316500
IR_HP_MMS_UV	TTHERM_00496990	BAS1.TTHERM_00496990	BAS1.TTHERM_00496990
IR_HP_MMS_CPT	TTHERM_00582020	NA	NA
IR_HP_UV_CPT	TTHERM_00585200	NA	NA
IR_MMS_UV_CPT	TTHERM_00080000	CDC28.TTHERM_00080000	CDC28.TTHERM_00080000
HP_MMS_UV_CPT	TTHERM_00486670	HAP2.TTHERM_00486670	HAP2.TTHERM_00486670
HU_IR_HP	NA	NA	NA
HU_IR_MMS	TTHERM_00218670	NAT1	NAT1.TTHERM_00218670
HU_IR_UV	TTHERM_00103860	NA	NA
HU_IR_CPT	TTHERM_00535120	ITR2.TTHERM_00535120	ITR2.TTHERM_00535120
HU_HP_MMS	NA	NA	NA
HU_HP_UV	TTHERM_00607200	NA	NA
HU_HP_CPT	NA	NA	NA
HU_MMS_UV	TTHERM_00077130	SCJ1.TTHERM_00077130	SCJ1.TTHERM_00077130
HU_MMS_CPT	TTHERM_00644610	NA	NA
HU_UV_CPT	TTHERM_00299970	NA	NA
IR_HP_MMS	NA	NA	NA
IR_HP_UV	TTHERM_00389930	NA	NA
IR_HP_CPT	NA	NA	NA
IR_MMS_UV	TTHERM_000780929	NA	NA
IR_MMS_CPT	TTHERM_00077410	NA	NA
IR_UV_CPT	TTHERM_00050540	NA	NA
HP_MMS_UV	TTHERM_00415620	NA	NA
HP_MMS_CPT	NA	NA	NA
HP_UV_CPT	TTHERM_00474990	NA	NA
MMS_UV_CPT	TTHERM_000675819	NA	NA
HU_IR	TTHERM_00077760	NA	NA
HU_HP	TTHERM_00938820	EEF2	EFT1.TTHERM_00938820
HU_MMS	TTHERM_00138449	YME1.TTHERM_00138449	YME1.TTHERM_00138449
HU_UV	TTHERM_00059440	NA	NA
HU_CPT	TTHERM_00243810	NA	NA
IR_HP	TTHERM_00290940	NA	NA
IR_MMS	TTHERM_001091293	NA	NA
IR_UV	TTHERM_000191179	NA	NA
IR_CPT	TTHERM_000470733	NA	NA
HP_MMS	NA	NA	NA
HP_UV	TTHERM_000661639	NA	NA
HP_CPT	TTHERM_00691540	NA	NA
MMS_UV	TTHERM_000657292	NA	NA
MMS_CPT	TTHERM_000481318	EPN3	NA
UV_CPT	TTHERM_00037400	JEM1.TTHERM_00037400	JEM1.TTHERM_00037400
HU	TTHERM_000457109	ROT2.TTHERM_000457109	ROT2.TTHERM_000457109
IR	TTHERM_000086999	NA	NA
HP	TTHERM_000437619	NA	NA
MMS	TTHERM_00024420	NA	NA
UV	TTHERM_000030229	NA	NA
CPT	TTHERM_00013030	NA	NA
HU_IR_HP_MMS_UV_CPT	TTHERM_00279930	NA	NA
HU_IR_HP_MMS_UV	NA	NA	NA
HU_IR_HP_MMS_CPT	NA	NA	NA
HU_IR_HP_UV_CPT	NA	NA	NA
HU_IR_MMS_UV_CPT	TTHERM_000730368	NA	NA
HU_HP_MMS_UV_CPT	NA	NA	NA
IR_HP_MMS_UV_CPT	TTHERM_00142330	RAD51	RAD51.TTHERM_00142330
HU_IR_HP_MMS	NA	NA	NA
HU_IR_HP_UV	TTHERM_00684530	UBP2.TTHERM_00684530	UBP2.TTHERM_00684530
HU_IR_HP_CPT	NA	NA	NA
HU_IR_MMS_UV	TTHERM_00112910	RIO2	RIO2.TTHERM_00112910
HU_IR_MMS_CPT	NA	NA	NA
HU_IR_UV_CPT	TTHERM_00339820	ADE3.TTHERM_00339820	ADE3.TTHERM_00339820
HU_HP_MMS_UV	NA	NA	NA
HU_HP_MMS_CPT	NA	NA	NA
HU_HP_UV_CPT	NA	NA	NA
HU_MMS_UV_CPT	TTHERM_00348650	NA	NA
IR_HP_MMS_UV	TTHERM_00583430	GDT1.TTHERM_00583430	GDT1.TTHERM_00583430
IR_HP_MMS_CPT	TTHERM_00584610	YPK1.TTHERM_00584610	YPK1.TTHERM_00584610
IR_HP_UV_CPT	TTHERM_00632820	MRNN05	NA
IR_MMS_UV_CPT	TTHERM_00083620	NA	NA
HP_MMS_UV_CPT	TTHERM_00569430	NA	NA
HU_IR_HP	NA	NA	NA
HU_IR_MMS	TTHERM_00245460	NA	NA
HU_IR_UV	TTHERM_00105270	NA	NA
HU_IR_CPT	TTHERM_00548140	IMB4	KAP123.TTHERM_00548140
HU_HP_MMS	NA	NA	NA
HU_HP_UV	TTHERM_00670310	PFA4.TTHERM_00670310	PFA4.TTHERM_00670310
HU_HP_CPT	NA	NA	NA
HU_MMS_UV	TTHERM_00079230	DIC3	MTC5.TTHERM_00079230
HU_MMS_CPT	TTHERM_00721690	NA	NA
HU_UV_CPT	TTHERM_00305400	NA	NA
IR_HP_MMS	NA	NA	NA
IR_HP_UV	TTHERM_00411780	NA	NA
IR_HP_CPT	NA	NA	NA
IR_MMS_UV	TTHERM_000786969	CDC15.TTHERM_000786969	CDC15.TTHERM_000786969
IR_MMS_CPT	TTHERM_000797949	DRS2.TTHERM_000797949	DRS2.TTHERM_000797949
IR_UV_CPT	TTHERM_00052010	NA	NA
HP_MMS_UV	TTHERM_00455120	FES1.TTHERM_00455120	FES1.TTHERM_00455120
HP_MMS_CPT	NA	NA	NA
HP_UV_CPT	TTHERM_00540050	SPI1	NA
MMS_UV_CPT	TTHERM_00075890	CTH65	NA
HU_IR	TTHERM_000825069	NA	NA
HU_HP	TTHERM_00999050	NA	NA
HU_MMS	TTHERM_00145070	ETR1.TTHERM_00145070	ETR1.TTHERM_00145070
HU_UV	TTHERM_00066950	DBR1.TTHERM_00066950	DBR1.TTHERM_00066950
HU_CPT	TTHERM_00245170	NA	NA
IR_HP	TTHERM_00317120	NA	NA
IR_MMS	TTHERM_001166292	TRM1.TTHERM_001166292	TRM1.TTHERM_001166292
IR_UV	TTHERM_000193169	NA	NA
IR_CPT	TTHERM_00047420	IRC24.TTHERM_00047420	IRC24.TTHERM_00047420
HP_MMS	NA	NA	NA
HP_UV	TTHERM_000698651	NA	NA
HP_CPT	TTHERM_00773500	DMT1	EFM5.TTHERM_00773500
MMS_UV	TTHERM_000672289	NA	NA
MMS_CPT	TTHERM_00051890	NA	NA
UV_CPT	TTHERM_00037640	PET9.TTHERM_00037640	PET9.TTHERM_00037640
HU	TTHERM_00046240	NA	NA
IR	TTHERM_000091539	NA	NA
HP	TTHERM_000449039	NA	NA
MMS	TTHERM_000245289	NA	NA
UV	TTHERM_000031688	NA	NA
CPT	TTHERM_00013100	JAC1.TTHERM_00013100	JAC1.TTHERM_00013100
HU_IR_HP_MMS_UV_CPT	TTHERM_00289180	NA	NA
HU_IR_HP_MMS_UV	NA	NA	NA
HU_IR_HP_MMS_CPT	NA	NA	NA
HU_IR_HP_UV_CPT	NA	NA	NA
HU_IR_MMS_UV_CPT	TTHERM_000765349	ACL4.TTHERM_000765349	ACL4.TTHERM_000765349
HU_HP_MMS_UV_CPT	NA	NA	NA
IR_HP_MMS_UV_CPT	TTHERM_00145230	ZTA1.TTHERM_00145230	ZTA1.TTHERM_00145230
HU_IR_HP_MMS	NA	NA	NA
HU_IR_HP_UV	TTHERM_01020720	NA	NA
HU_IR_HP_CPT	NA	NA	NA
HU_IR_MMS_UV	TTHERM_00137920	REI1.TTHERM_00137920	REI1.TTHERM_00137920
HU_IR_MMS_CPT	NA	NA	NA
HU_IR_UV_CPT	TTHERM_00348870	NA	NA
HU_HP_MMS_UV	NA	NA	NA
HU_HP_MMS_CPT	NA	NA	NA
HU_HP_UV_CPT	NA	NA	NA
HU_MMS_UV_CPT	TTHERM_00371200	NA	NA
IR_HP_MMS_UV	TTHERM_00624710	CMD1.TTHERM_00624710	CMD1.TTHERM_00624710
IR_HP_MMS_CPT	TTHERM_00600070	YOL075C.TTHERM_00600070	YOL075C.TTHERM_00600070
IR_HP_UV_CPT	TTHERM_00641210	IXR1	IXR1.TTHERM_00641210
IR_MMS_UV_CPT	TTHERM_00086830	NA	NA
HP_MMS_UV_CPT	TTHERM_00590490	NA	NA
HU_IR_HP	NA	NA	NA
HU_IR_MMS	TTHERM_00276070	NA	NA
HU_IR_UV	TTHERM_00106940	GRS1	YBR121C.TTHERM_00106940
HU_IR_CPT	TTHERM_00565630	AIP2	NA
HU_HP_MMS	NA	NA	NA
HU_HP_UV	TTHERM_00780430	NA	NA
HU_HP_CPT	NA	NA	NA
HU_MMS_UV	TTHERM_00080020	MRNN14	NA
HU_MMS_CPT	TTHERM_00732610	NAM7.TTHERM_00732610	NAM7.TTHERM_00732610
HU_UV_CPT	TTHERM_00355490	NA	NA
IR_HP_MMS	NA	NA	NA
IR_HP_UV	TTHERM_00420200	NA	NA
IR_HP_CPT	NA	NA	NA
IR_MMS_UV	TTHERM_000992819	CDC4.TTHERM_000992819	CDC4.TTHERM_000992819
IR_MMS_CPT	TTHERM_001006569	RSA4.TTHERM_001006569	RSA4.TTHERM_001006569
IR_UV_CPT	TTHERM_00052480	NA	NA
HP_MMS_UV	TTHERM_00498220	NA	NA
HP_MMS_CPT	NA	NA	NA
HP_UV_CPT	TTHERM_00686170	CTP1.TTHERM_00686170	CTP1.TTHERM_00686170
MMS_UV_CPT	TTHERM_00077090	PCP4	FKS3.TTHERM_00077090
HU_IR	TTHERM_000836782	INS3	NA
HU_HP	TTHERM_01085680	YMR226C.TTHERM_01085680	YMR226C.TTHERM_01085680
HU_MMS	TTHERM_00155320	GIR2.TTHERM_00155320	GIR2.TTHERM_00155320
HU_UV	TTHERM_000703669	CYR1.TTHERM_000703669	CYR1.TTHERM_000703669
HU_CPT	TTHERM_00245200	RRM69	NA
IR_HP	TTHERM_00318600	CMK1.TTHERM_00318600	CMK1.TTHERM_00318600
IR_MMS	TTHERM_00122050	ALO1.TTHERM_00122050	ALO1.TTHERM_00122050
IR_UV	TTHERM_000202969	NA	NA
IR_CPT	TTHERM_000477018	NA	NA
HP_MMS	NA	NA	NA
HP_UV	TTHERM_00086770	YSH1.TTHERM_00086770	YSH1.TTHERM_00086770
HP_CPT	TTHERM_00833720	NA	NA
MMS_UV	TTHERM_000675679	NA	NA
MMS_CPT	TTHERM_00058860	NA	NA
UV_CPT	TTHERM_000377351	NA	NA
HU	TTHERM_00046900	OXR1.TTHERM_00046900	OXR1.TTHERM_00046900
IR	TTHERM_000091579	ERG10.TTHERM_000091579	ERG10.TTHERM_000091579
HP	TTHERM_00047580	HEM12.TTHERM_00047580	HEM12.TTHERM_00047580
MMS	TTHERM_000259511	CDC5.TTHERM_000259511	CDC5.TTHERM_000259511
UV	TTHERM_000035589	NA	NA
CPT	TTHERM_00013510	NA	NA
HU_IR_HP_MMS_UV_CPT	TTHERM_00289300	NA	NA
HU_IR_HP_MMS_UV	NA	NA	NA
HU_IR_HP_MMS_CPT	NA	NA	NA
HU_IR_HP_UV_CPT	NA	NA	NA
HU_IR_MMS_UV_CPT	TTHERM_00077110	EMW1.TTHERM_00077110	EMW1.TTHERM_00077110
HU_HP_MMS_UV_CPT	NA	NA	NA
IR_HP_MMS_UV_CPT	TTHERM_00150000	MSH6L3	MSH6.TTHERM_00150000
HU_IR_HP_MMS	NA	NA	NA
HU_IR_HP_UV	NA	NA	NA
HU_IR_HP_CPT	NA	NA	NA
HU_IR_MMS_UV	TTHERM_00138370	ATG7	ATG7.TTHERM_00138370
HU_IR_MMS_CPT	NA	NA	NA
HU_IR_UV_CPT	TTHERM_00355150	NA	NA
HU_HP_MMS_UV	NA	NA	NA
HU_HP_MMS_CPT	NA	NA	NA
HU_HP_UV_CPT	NA	NA	NA
HU_MMS_UV_CPT	TTHERM_00406590	BBC118	CDC31.TTHERM_00406590
IR_HP_MMS_UV	TTHERM_00624870	MUS81	MUS81.TTHERM_00624870
IR_HP_MMS_CPT	TTHERM_00624730	GRL3	NA
IR_HP_UV_CPT	TTHERM_00646860	GUD1.TTHERM_00646860	GUD1.TTHERM_00646860
IR_MMS_UV_CPT	TTHERM_00091740	NA	NA
HP_MMS_UV_CPT	TTHERM_00715720	AAG1	NA
HU_IR_HP	NA	NA	NA
HU_IR_MMS	TTHERM_00293430	EPT1.TTHERM_00293430	EPT1.TTHERM_00293430
HU_IR_UV	TTHERM_00133750	CDK7	NA
HU_IR_CPT	TTHERM_00658959	DPH1.TTHERM_00658959	DPH1.TTHERM_00658959
HU_HP_MMS	NA	NA	NA
HU_HP_UV	NA	NA	NA
HU_HP_CPT	NA	NA	NA
HU_MMS_UV	TTHERM_00083380	NA	NA
HU_MMS_CPT	TTHERM_00971800	NA	NA
HU_UV_CPT	TTHERM_00377310	CMK2.TTHERM_00377310	CMK2.TTHERM_00377310
IR_HP_MMS	NA	NA	NA
IR_HP_UV	TTHERM_00446340	PEP4.TTHERM_00446340	PEP4.TTHERM_00446340
IR_HP_CPT	NA	NA	NA
IR_MMS_UV	TTHERM_001020839	NA	NA
IR_MMS_CPT	TTHERM_00107130	LEA1.TTHERM_00107130	LEA1.TTHERM_00107130
IR_UV_CPT	TTHERM_000564499	NA	NA
HP_MMS_UV	TTHERM_00499300	DYH4	DYN1.TTHERM_00499300
HP_MMS_CPT	NA	NA	NA
HP_UV_CPT	TTHERM_00835440	NA	NA
MMS_UV_CPT	TTHERM_00079420	NA	NA
HU_IR	TTHERM_00086700	MRNC57	NA
HU_HP	NA	NA	NA
HU_MMS	TTHERM_00187260	YMR226C.TTHERM_00187260	YMR226C.TTHERM_00187260
HU_UV	TTHERM_00075660	NA	NA
HU_CPT	TTHERM_00250970	GSH1.TTHERM_00250970	GSH1.TTHERM_00250970
IR_HP	TTHERM_00321580	CDC15.TTHERM_00321580	CDC15.TTHERM_00321580
IR_MMS	TTHERM_00136390	NA	NA
IR_UV	TTHERM_000218509	NA	NA
IR_CPT	TTHERM_000481289	NA	NA
HP_MMS	NA	NA	NA
HP_UV	TTHERM_00088160	PPH21.TTHERM_00088160	PPH21.TTHERM_00088160
HP_CPT	TTHERM_00925430	NA	NA
MMS_UV	TTHERM_00069369	NA	NA
MMS_CPT	TTHERM_000617817	NA	NA
UV_CPT	TTHERM_000418498	NA	NA
HU	TTHERM_00046980	ARE2.TTHERM_00046980	ARE2.TTHERM_00046980
IR	TTHERM_000095401	NAM7.TTHERM_000095401	NAM7.TTHERM_000095401
HP	TTHERM_000491291	NA	NA
MMS	TTHERM_000264929	NA	NA
UV	TTHERM_000035659	NA	NA
CPT	TTHERM_00013540	SLD5.TTHERM_00013540	SLD5.TTHERM_00013540
HU_IR_HP_MMS_UV_CPT	TTHERM_00310900	NA	NA
HU_IR_HP_MMS_UV	NA	NA	NA
HU_IR_HP_MMS_CPT	NA	NA	NA
HU_IR_HP_UV_CPT	NA	NA	NA
HU_IR_MMS_UV_CPT	TTHERM_00077650	NA	NA
HU_HP_MMS_UV_CPT	NA	NA	NA
IR_HP_MMS_UV_CPT	TTHERM_00196400	NA	NA
HU_IR_HP_MMS	NA	NA	NA
HU_IR_HP_UV	NA	NA	NA
HU_IR_HP_CPT	NA	NA	NA
HU_IR_MMS_UV	TTHERM_00144900	NA	NA
HU_IR_MMS_CPT	NA	NA	NA
HU_IR_UV_CPT	TTHERM_00420410	MDL2.TTHERM_00420410	MDL2.TTHERM_00420410
HU_HP_MMS_UV	NA	NA	NA
HU_HP_MMS_CPT	NA	NA	NA
HU_HP_UV_CPT	NA	NA	NA
HU_MMS_UV_CPT	TTHERM_00421150	PPI20	FPR1.TTHERM_00421150
IR_HP_MMS_UV	TTHERM_00654240	NA	NA
IR_HP_MMS_CPT	TTHERM_00724750	YVC1.TTHERM_00724750	YVC1.TTHERM_00724750
IR_HP_UV_CPT	TTHERM_00666280	NA	NA
IR_MMS_UV_CPT	TTHERM_00092850	MCM3	MCM3.TTHERM_00092850
HP_MMS_UV_CPT	TTHERM_00784600	KET2	KIP3.TTHERM_00784600
HU_IR_HP	NA	NA	NA
HU_IR_MMS	TTHERM_00300410	OLA1.TTHERM_00300410	OLA1.TTHERM_00300410
HU_IR_UV	TTHERM_00142350	TRM732.TTHERM_00142350	TRM732.TTHERM_00142350
HU_IR_CPT	TTHERM_00689870	NA	NA
HU_HP_MMS	NA	NA	NA
HU_HP_UV	NA	NA	NA
HU_HP_CPT	NA	NA	NA
HU_MMS_UV	TTHERM_00083680	RRP1.TTHERM_00083680	RRP1.TTHERM_00083680
HU_MMS_CPT	TTHERM_01287980	ILV2.TTHERM_01287980	ILV2.TTHERM_01287980
HU_UV_CPT	TTHERM_00419940	NA	NA
IR_HP_MMS	NA	NA	NA
IR_HP_UV	TTHERM_00466130	SFR5	NA
IR_HP_CPT	NA	NA	NA
IR_MMS_UV	TTHERM_00105110	HSP70	SSA4.TTHERM_00105110
IR_MMS_CPT	TTHERM_00129780	LIH1.TTHERM_00129780	LIH1.TTHERM_00129780
IR_UV_CPT	TTHERM_00061570	PMR1.TTHERM_00061570	PMR1.TTHERM_00061570
HP_MMS_UV	TTHERM_00500760	NA	NA
HP_MMS_CPT	NA	NA	NA
HP_UV_CPT	TTHERM_00898280	SNF1.TTHERM_00898280	SNF1.TTHERM_00898280
MMS_UV_CPT	TTHERM_00079430	NA	NA
HU_IR	TTHERM_00086960	RKR1.TTHERM_00086960	RKR1.TTHERM_00086960
HU_HP	NA	NA	NA
HU_MMS	TTHERM_00190840	NA	NA
HU_UV	TTHERM_00079260	NA	NA
HU_CPT	TTHERM_00283100	NA	NA
IR_HP	TTHERM_00339630	NA	NA
IR_MMS	TTHERM_00141040	NA	NA
IR_UV	TTHERM_000239349	NA	NA
IR_CPT	TTHERM_00048970	NA	NA
HP_MMS	NA	NA	NA
HP_UV	TTHERM_000933400	PUB1.TTHERM_000933400	PUB1.TTHERM_000933400
HP_CPT	TTHERM_00954250	NA	NA
MMS_UV	TTHERM_000760319	NA	NA
MMS_CPT	TTHERM_000621168	NA	NA
UV_CPT	TTHERM_000422226	NA	NA
HU	TTHERM_00047280	TGL2.TTHERM_00047280	TGL2.TTHERM_00047280
IR	TTHERM_000109313	NA	NA
HP	TTHERM_00059500	NA	NA
MMS	TTHERM_000266278	NA	NA
UV	TTHERM_000036939	NA	NA
CPT	TTHERM_000144909	NA	NA
HU_IR_HP_MMS_UV_CPT	TTHERM_00313280	RAD16.TTHERM_00313280	RAD16.TTHERM_00313280
HU_IR_HP_MMS_UV	NA	NA	NA
HU_IR_HP_MMS_CPT	NA	NA	NA
HU_IR_HP_UV_CPT	NA	NA	NA
HU_IR_MMS_UV_CPT	TTHERM_00077690	NA	NA
HU_HP_MMS_UV_CPT	NA	NA	NA
IR_HP_MMS_UV_CPT	TTHERM_00196440	NA	NA
HU_IR_HP_MMS	NA	NA	NA
HU_IR_HP_UV	NA	NA	NA
HU_IR_HP_CPT	NA	NA	NA
HU_IR_MMS_UV	TTHERM_00145010	NA	NA
HU_IR_MMS_CPT	NA	NA	NA
HU_IR_UV_CPT	TTHERM_00420930	NA	NA
HU_HP_MMS_UV	NA	NA	NA
HU_HP_MMS_CPT	NA	NA	NA
HU_HP_UV_CPT	NA	NA	NA
HU_MMS_UV_CPT	TTHERM_00455540	URA6.TTHERM_00455540	URA6.TTHERM_00455540
IR_HP_MMS_UV	TTHERM_00655290	CDC31.TTHERM_00655290	CDC31.TTHERM_00655290
IR_HP_MMS_CPT	TTHERM_01055600	GRL8	NA
IR_HP_UV_CPT	TTHERM_00691570	NA	NA
IR_MMS_UV_CPT	TTHERM_000938792	NA	NA
HP_MMS_UV_CPT	TTHERM_00899460	POT1.TTHERM_00899460	POT1.TTHERM_00899460
HU_IR_HP	NA	NA	NA
HU_IR_MMS	TTHERM_00310580	NA	NA
HU_IR_UV	TTHERM_00145350	MPC3.TTHERM_00145350	MPC3.TTHERM_00145350
HU_IR_CPT	TTHERM_00756370	IZH2.TTHERM_00756370	IZH2.TTHERM_00756370
HU_HP_MMS	NA	NA	NA
HU_HP_UV	NA	NA	NA
HU_HP_CPT	NA	NA	NA
HU_MMS_UV	TTHERM_00095540	CBF5	CBF5.TTHERM_00095540
HU_MMS_CPT	NA	NA	NA
HU_UV_CPT	TTHERM_00440550	NA	NA
IR_HP_MMS	NA	NA	NA
IR_HP_UV	TTHERM_00474780	QNS1.TTHERM_00474780	QNS1.TTHERM_00474780
IR_HP_CPT	NA	NA	NA
IR_MMS_UV	TTHERM_00105580	NA	NA
IR_MMS_CPT	TTHERM_00140780	VBA5.TTHERM_00140780	VBA5.TTHERM_00140780
IR_UV_CPT	TTHERM_000653668	COQ2.TTHERM_000653668	COQ2.TTHERM_000653668
HP_MMS_UV	TTHERM_00527290	YDR541C.TTHERM_00527290	YDR541C.TTHERM_00527290
HP_MMS_CPT	NA	NA	NA
HP_UV_CPT	TTHERM_00954270	NA	NA
MMS_UV_CPT	TTHERM_000930769	APS3.TTHERM_000930769	APS3.TTHERM_000930769
HU_IR	TTHERM_00089220	CUL3.TTHERM_00089220	CUL3.TTHERM_00089220
HU_HP	NA	NA	NA
HU_MMS	TTHERM_00194270	TIF34.TTHERM_00194270	TIF34.TTHERM_00194270
HU_UV	TTHERM_00082160	NA	NA
HU_CPT	TTHERM_00313820	NA	NA
IR_HP	TTHERM_00353480	LST8.TTHERM_00353480	LST8.TTHERM_00353480
IR_MMS	TTHERM_00141050	NA	NA
IR_UV	TTHERM_000263288	NA	NA
IR_CPT	TTHERM_00048980	DPB2	DPB2.TTHERM_00048980
HP_MMS	NA	NA	NA
HP_UV	TTHERM_00101360	YJU2.TTHERM_00101360	YJU2.TTHERM_00101360
HP_CPT	TTHERM_01018420	THD8	HST2.TTHERM_01018420
MMS_UV	TTHERM_00077050	NA	NA
MMS_CPT	TTHERM_00068170	TCB2	NA
UV_CPT	TTHERM_000467539	NA	NA
HU	TTHERM_00048770	SWF1.TTHERM_00048770	SWF1.TTHERM_00048770
IR	TTHERM_00011020	ATG4.TTHERM_00011020	ATG4.TTHERM_00011020
HP	TTHERM_000599829	MKK1.TTHERM_000599829	MKK1.TTHERM_000599829
MMS	TTHERM_000287919	NA	NA
UV	TTHERM_000037209	NA	NA
CPT	TTHERM_000151409	NA	NA
HU_IR_HP_MMS_UV_CPT	TTHERM_00316640	NA	NA
HU_IR_HP_MMS_UV	NA	NA	NA
HU_IR_HP_MMS_CPT	NA	NA	NA
HU_IR_HP_UV_CPT	NA	NA	NA
HU_IR_MMS_UV_CPT	TTHERM_00080030	HSP82.TTHERM_00080030	HSP82.TTHERM_00080030
HU_HP_MMS_UV_CPT	NA	NA	NA
IR_HP_MMS_UV_CPT	TTHERM_00218760	TEB1	RFA1.TTHERM_00218760
HU_IR_HP_MMS	NA	NA	NA
HU_IR_HP_UV	NA	NA	NA
HU_IR_HP_CPT	NA	NA	NA
HU_IR_MMS_UV	TTHERM_00145260	GAL1.TTHERM_00145260	GAL1.TTHERM_00145260
HU_IR_MMS_CPT	NA	NA	NA
HU_IR_UV_CPT	TTHERM_00444610	NA	NA
HU_HP_MMS_UV	NA	NA	NA
HU_HP_MMS_CPT	NA	NA	NA
HU_HP_UV_CPT	NA	NA	NA
HU_MMS_UV_CPT	TTHERM_00481300	EPI35	NA
IR_HP_MMS_UV	TTHERM_00655970	NA	NA
IR_HP_MMS_CPT	TTHERM_01372820	NA	NA
IR_HP_UV_CPT	TTHERM_00723610	UDH10	HMI1.TTHERM_00723610
IR_MMS_UV_CPT	TTHERM_00093940	NA	NA
HP_MMS_UV_CPT	TTHERM_00954170	NA	NA
HU_IR_HP	NA	NA	NA
HU_IR_MMS	TTHERM_00316680	DRH28	SPB4.TTHERM_00316680
HU_IR_UV	TTHERM_00161090	NPT1.TTHERM_00161090	NPT1.TTHERM_00161090
HU_IR_CPT	TTHERM_00773160	POX1.TTHERM_00773160	POX1.TTHERM_00773160
HU_HP_MMS	NA	NA	NA
HU_HP_UV	NA	NA	NA
HU_HP_CPT	NA	NA	NA
HU_MMS_UV	TTHERM_001207740	NA	NA
HU_MMS_CPT	NA	NA	NA
HU_UV_CPT	TTHERM_00474670	MCF7	YPR011C.TTHERM_00474670
IR_HP_MMS	NA	NA	NA
IR_HP_UV	TTHERM_00487110	PRE10	PRE10.TTHERM_00487110
IR_HP_CPT	NA	NA	NA
IR_MMS_UV	TTHERM_00106969	MRPL8.TTHERM_00106969	MRPL8.TTHERM_00106969
IR_MMS_CPT	TTHERM_00141201	NA	NA
IR_UV_CPT	TTHERM_00066840	CYC26	NA
HP_MMS_UV	TTHERM_00529790	CIT1	CIT1.TTHERM_00529790
HP_MMS_CPT	NA	NA	NA
HP_UV_CPT	TTHERM_01020760	NA	NA
MMS_UV_CPT	TTHERM_001020699	NA	NA
HU_IR	TTHERM_00107040	KDX1.TTHERM_00107040	KDX1.TTHERM_00107040
HU_HP	NA	NA	NA
HU_MMS	TTHERM_00219270	MCX1.TTHERM_00219270	MCX1.TTHERM_00219270
HU_UV	TTHERM_00105060	DRH11	DBP1.TTHERM_00105060
HU_CPT	TTHERM_00426190	NA	NA
IR_HP	TTHERM_00353500	NA	NA
IR_MMS	TTHERM_00145060	ETR1.TTHERM_00145060	ETR1.TTHERM_00145060
IR_UV	TTHERM_00028590	NCL1.TTHERM_00028590	NCL1.TTHERM_00028590
IR_CPT	TTHERM_00058330	NA	NA
HP_MMS	NA	NA	NA
HP_UV	TTHERM_00120890	SEC3.TTHERM_00120890	SEC3.TTHERM_00120890
HP_CPT	TTHERM_01075800	NA	NA
MMS_UV	TTHERM_00079140	NA	NA
MMS_CPT	TTHERM_000688719	CDC14.TTHERM_000688719	CDC14.TTHERM_000688719
UV_CPT	TTHERM_000470591	NA	NA
HU	TTHERM_000495899	NA	NA
IR	TTHERM_000112789	NA	NA
HP	TTHERM_00068140	LSC1	LSC1.TTHERM_00068140
MMS	TTHERM_000289499	NA	NA
UV	TTHERM_000037389	NA	NA
CPT	TTHERM_000151976	HSL1.TTHERM_000151976	HSL1.TTHERM_000151976
HU_IR_HP_MMS_UV_CPT	TTHERM_00321750	NA	NA
HU_IR_HP_MMS_UV	NA	NA	NA
HU_IR_HP_MMS_CPT	NA	NA	NA
HU_IR_HP_UV_CPT	NA	NA	NA
HU_IR_MMS_UV_CPT	TTHERM_000823729	NA	NA
HU_HP_MMS_UV_CPT	NA	NA	NA
IR_HP_MMS_UV_CPT	TTHERM_00274500	GRE3.TTHERM_00274500	GRE3.TTHERM_00274500
HU_IR_HP_MMS	NA	NA	NA
HU_IR_HP_UV	NA	NA	NA
HU_IR_HP_CPT	NA	NA	NA
HU_IR_MMS_UV	TTHERM_00148700	CYC1.TTHERM_00148700	CYC1.TTHERM_00148700
HU_IR_MMS_CPT	NA	NA	NA
HU_IR_UV_CPT	TTHERM_00445950	NA	NA
HU_HP_MMS_UV	NA	NA	NA
HU_HP_MMS_CPT	NA	NA	NA
HU_HP_UV_CPT	NA	NA	NA
HU_MMS_UV_CPT	TTHERM_00497260	SKI3.TTHERM_00497260	SKI3.TTHERM_00497260
IR_HP_MMS_UV	TTHERM_00777260	NA	NA
IR_HP_MMS_CPT	NA	NA	NA
IR_HP_UV_CPT	TTHERM_00730350	NA	NA
IR_MMS_UV_CPT	TTHERM_001018451	NA	NA
HP_MMS_UV_CPT	TTHERM_01040860	JSL3	NA
HU_IR_HP	NA	NA	NA
HU_IR_MMS	TTHERM_00347930	YGR271C.TTHERM_00347930	YGR271C.TTHERM_00347930
HU_IR_UV	TTHERM_00188460	NA	NA
HU_IR_CPT	TTHERM_00802330	UBI4	UBI4.TTHERM_00802330
HU_HP_MMS	NA	NA	NA
HU_HP_UV	NA	NA	NA
HU_HP_CPT	NA	NA	NA
HU_MMS_UV	TTHERM_00127100	NA	NA
HU_MMS_CPT	NA	NA	NA
HU_UV_CPT	TTHERM_00486810	IMD4.TTHERM_00486810	IMD4.TTHERM_00486810
IR_HP_MMS	NA	NA	NA
IR_HP_UV	TTHERM_00520930	NA	NA
IR_HP_CPT	NA	NA	NA
IR_MMS_UV	TTHERM_00112760	NA	NA
IR_MMS_CPT	TTHERM_00145480	NA	NA
IR_UV_CPT	TTHERM_00068070	NA	NA
HP_MMS_UV	TTHERM_00565600	DYH22	DYN1.TTHERM_00565600
HP_MMS_CPT	NA	NA	NA
HP_UV_CPT	TTHERM_01029930	YLR126C.TTHERM_01029930	YLR126C.TTHERM_01029930
MMS_UV_CPT	TTHERM_001170561	CMK2.TTHERM_001170561	CMK2.TTHERM_001170561
HU_IR	TTHERM_001257658	NA	NA
HU_HP	NA	NA	NA
HU_MMS	TTHERM_00242189	MSS1.TTHERM_00242189	MSS1.TTHERM_00242189
HU_UV	TTHERM_00106830	NA	NA
HU_CPT	TTHERM_00427610	NA	NA
IR_HP	TTHERM_00405530	ALD4.TTHERM_00405530	ALD4.TTHERM_00405530
IR_MMS	TTHERM_00146090	NA	NA
IR_UV	TTHERM_000295089	NA	NA
IR_CPT	TTHERM_000588918	NA	NA
HP_MMS	NA	NA	NA
HP_UV	TTHERM_00129510	NA	NA
HP_CPT	NA	NA	NA
MMS_UV	TTHERM_000794599	NA	NA
MMS_CPT	TTHERM_00070980	POX1.TTHERM_00070980	POX1.TTHERM_00070980
UV_CPT	TTHERM_00047130	NA	NA
HU	TTHERM_00052030	CTH1.TTHERM_00052030	CTH1.TTHERM_00052030
IR	TTHERM_00011550	NA	NA
HP	TTHERM_00068150	YMR1.TTHERM_00068150	YMR1.TTHERM_00068150
MMS	TTHERM_000295199	NA	NA
UV	TTHERM_000043811	NA	NA
CPT	TTHERM_000161539	NA	NA
HU_IR_HP_MMS_UV_CPT	TTHERM_00338250	NA	NA
HU_IR_HP_MMS_UV	NA	NA	NA
HU_IR_HP_MMS_CPT	NA	NA	NA
HU_IR_HP_UV_CPT	NA	NA	NA
HU_IR_MMS_UV_CPT	TTHERM_00086780	CCF12	NA
HU_HP_MMS_UV_CPT	NA	NA	NA
IR_HP_MMS_UV_CPT	TTHERM_00295920	MSH2	MSH2.TTHERM_00295920
HU_IR_HP_MMS	NA	NA	NA
HU_IR_HP_UV	NA	NA	NA
HU_IR_HP_CPT	NA	NA	NA
HU_IR_MMS_UV	TTHERM_00149960	NA	NA
HU_IR_MMS_CPT	NA	NA	NA
HU_IR_UV_CPT	TTHERM_00476610	NA	NA
HU_HP_MMS_UV	NA	NA	NA
HU_HP_MMS_CPT	NA	NA	NA
HU_HP_UV_CPT	NA	NA	NA
HU_MMS_UV_CPT	TTHERM_00526730	TAP1	AVT4.TTHERM_00526730
IR_HP_MMS_UV	TTHERM_00794020	GCV2.TTHERM_00794020	GCV2.TTHERM_00794020
IR_HP_MMS_CPT	NA	NA	NA
IR_HP_UV_CPT	TTHERM_00756120	NA	NA
IR_MMS_UV_CPT	TTHERM_00105090	PLP1.TTHERM_00105090	PLP1.TTHERM_00105090
HP_MMS_UV_CPT	TTHERM_01093580	NA	NA
HU_IR_HP	NA	NA	NA
HU_IR_MMS	TTHERM_00349030	NA	NA
HU_IR_UV	TTHERM_00193720	NA	NA
HU_IR_CPT	TTHERM_00930820	LST8.TTHERM_00930820	LST8.TTHERM_00930820
HU_HP_MMS	NA	NA	NA
HU_HP_UV	NA	NA	NA
HU_HP_CPT	NA	NA	NA
HU_MMS_UV	TTHERM_00129290	NA	NA
HU_MMS_CPT	NA	NA	NA
HU_UV_CPT	TTHERM_00516300	NA	NA
IR_HP_MMS	NA	NA	NA
IR_HP_UV	TTHERM_00522200	NA	NA
IR_HP_CPT	NA	NA	NA
IR_MMS_UV	TTHERM_00125100	NA	NA
IR_MMS_CPT	TTHERM_00160720	PEX1.TTHERM_00160720	PEX1.TTHERM_00160720
IR_UV_CPT	TTHERM_00069700	NA	NA
HP_MMS_UV	TTHERM_00566760	NA	NA
HP_MMS_CPT	NA	NA	NA
HP_UV_CPT	NA	NA	NA
MMS_UV_CPT	TTHERM_00125590	AAC3.TTHERM_00125590	AAC3.TTHERM_00125590
HU_IR	TTHERM_00131340	NA	NA
HU_HP	NA	NA	NA
HU_MMS	TTHERM_00301800	NA	NA
HU_UV	TTHERM_001071453	BUD13.TTHERM_001071453	BUD13.TTHERM_001071453
HU_CPT	TTHERM_00433870	ECM18.TTHERM_00433870	ECM18.TTHERM_00433870
IR_HP	TTHERM_00411850	NA	NA
IR_MMS	TTHERM_00150029	ERO1.TTHERM_00150029	ERO1.TTHERM_00150029
IR_UV	TTHERM_00029950	NA	NA
IR_CPT	TTHERM_000617816	NA	NA
HP_MMS	NA	NA	NA
HP_UV	TTHERM_00143530	PSH1.TTHERM_00143530	PSH1.TTHERM_00143530
HP_CPT	NA	NA	NA
MMS_UV	TTHERM_00079880	NA	NA
MMS_CPT	TTHERM_00079610	NA	NA
UV_CPT	TTHERM_000490749	NA	NA
HU	TTHERM_00053780	NA	NA
IR	TTHERM_00011890	SNF1.TTHERM_00011890	SNF1.TTHERM_00011890
HP	TTHERM_000688831	NA	NA
MMS	TTHERM_00029940	NA	NA
UV	TTHERM_000046389	PHO23.TTHERM_000046389	PHO23.TTHERM_000046389
CPT	TTHERM_00019630	NA	NA
HU_IR_HP_MMS_UV_CPT	TTHERM_00382290	MNDP1	MND1.TTHERM_00382290
HU_IR_HP_MMS_UV	NA	NA	NA
HU_IR_HP_MMS_CPT	NA	NA	NA
HU_IR_HP_UV_CPT	NA	NA	NA
HU_IR_MMS_UV_CPT	TTHERM_001008629	NA	NA
HU_HP_MMS_UV_CPT	NA	NA	NA
IR_HP_MMS_UV_CPT	TTHERM_00298220	RAD5L4	RAD5.TTHERM_00298220
HU_IR_HP_MMS	NA	NA	NA
HU_IR_HP_UV	NA	NA	NA
HU_IR_HP_CPT	NA	NA	NA
HU_IR_MMS_UV	TTHERM_00151810	TUF1.TTHERM_00151810	TUF1.TTHERM_00151810
HU_IR_MMS_CPT	NA	NA	NA
HU_IR_UV_CPT	TTHERM_00490930	NA	NA
HU_HP_MMS_UV	NA	NA	NA
HU_HP_MMS_CPT	NA	NA	NA
HU_HP_UV_CPT	NA	NA	NA
HU_MMS_UV_CPT	TTHERM_00530620	SRM1.TTHERM_00530620	SRM1.TTHERM_00530620
IR_HP_MMS_UV	TTHERM_00822350	NA	NA
IR_HP_MMS_CPT	NA	NA	NA
IR_HP_UV_CPT	TTHERM_00778410	CYC8.TTHERM_00778410	CYC8.TTHERM_00778410
IR_MMS_UV_CPT	TTHERM_001147129	NA	NA
HP_MMS_UV_CPT	TTHERM_01230100	NA	NA
HU_IR_HP	NA	NA	NA
HU_IR_MMS	TTHERM_00390100	NA	NA
HU_IR_UV	TTHERM_00238980	KIP1.TTHERM_00238980	KIP1.TTHERM_00238980
HU_IR_CPT	TTHERM_01049280	Anqa4	NA
HU_HP_MMS	NA	NA	NA
HU_HP_UV	NA	NA	NA
HU_HP_CPT	NA	NA	NA
HU_MMS_UV	TTHERM_00129470	SGD1.TTHERM_00129470	SGD1.TTHERM_00129470
HU_MMS_CPT	NA	NA	NA
HU_UV_CPT	TTHERM_00518690	NA	NA
IR_HP_MMS	NA	NA	NA
IR_HP_UV	TTHERM_00535970	YOL075C.TTHERM_00535970	YOL075C.TTHERM_00535970
IR_HP_CPT	NA	NA	NA
IR_MMS_UV	TTHERM_00125270	NA	NA
IR_MMS_CPT	TTHERM_00160740	NA	NA
IR_UV_CPT	TTHERM_000705122	NA	NA
HP_MMS_UV	TTHERM_00621170	NA	NA
HP_MMS_CPT	NA	NA	NA
HP_UV_CPT	NA	NA	NA
MMS_UV_CPT	TTHERM_00138150	NA	NA
HU_IR	TTHERM_00136240	MRPL10.TTHERM_00136240	MRPL10.TTHERM_00136240
HU_HP	NA	NA	NA
HU_MMS	TTHERM_00313530	NA	NA
HU_UV	TTHERM_00125620	PDE2.TTHERM_00125620	PDE2.TTHERM_00125620
HU_CPT	TTHERM_00443070	NA	NA
IR_HP	TTHERM_00455320	NA	NA
IR_MMS	TTHERM_00157910	NA	NA
IR_UV	TTHERM_00029960	NA	NA
IR_CPT	TTHERM_00069420	MCM5	MCM5.TTHERM_00069420
HP_MMS	NA	NA	NA
HP_UV	TTHERM_00192030	NA	NA
HP_CPT	NA	NA	NA
MMS_UV	TTHERM_00082220	NA	NA
MMS_CPT	TTHERM_000841299	RAD53.TTHERM_000841299	RAD53.TTHERM_000841299
UV_CPT	TTHERM_000498019	NA	NA
HU	TTHERM_00058530	NA	NA
IR	TTHERM_000131339	SLC1.TTHERM_000131339	SLC1.TTHERM_000131339
HP	TTHERM_000723359	NA	NA
MMS	TTHERM_000299929	NA	NA
UV	TTHERM_000058649	NA	NA
CPT	TTHERM_000218279	NA	NA
HU_IR_HP_MMS_UV_CPT	TTHERM_00411620	LST8.TTHERM_00411620	LST8.TTHERM_00411620
HU_IR_HP_MMS_UV	NA	NA	NA
HU_IR_HP_MMS_CPT	NA	NA	NA
HU_IR_HP_UV_CPT	NA	NA	NA
HU_IR_MMS_UV_CPT	TTHERM_00101260	NA	NA
HU_HP_MMS_UV_CPT	NA	NA	NA
IR_HP_MMS_UV_CPT	TTHERM_00300160	NA	NA
HU_IR_HP_MMS	NA	NA	NA
HU_IR_HP_UV	NA	NA	NA
HU_IR_HP_CPT	NA	NA	NA
HU_IR_MMS_UV	TTHERM_00162870	NA	NA
HU_IR_MMS_CPT	NA	NA	NA
HU_IR_UV_CPT	TTHERM_00497120	COX15.TTHERM_00497120	COX15.TTHERM_00497120
HU_HP_MMS_UV	NA	NA	NA
HU_HP_MMS_CPT	NA	NA	NA
HU_HP_UV_CPT	NA	NA	NA
HU_MMS_UV_CPT	TTHERM_00537440	NA	NA
IR_HP_MMS_UV	TTHERM_00898180	NA	NA
IR_HP_MMS_CPT	NA	NA	NA
IR_HP_UV_CPT	TTHERM_00799190	NA	NA
IR_MMS_UV_CPT	TTHERM_00122260	NA	NA
HP_MMS_UV_CPT	NA	NA	NA
HU_IR_HP	NA	NA	NA
HU_IR_MMS	TTHERM_00426260	NA	NA
HU_IR_UV	TTHERM_00239380	ETR1.TTHERM_00239380	ETR1.TTHERM_00239380
HU_IR_CPT	TTHERM_01169380	NA	NA
HU_HP_MMS	NA	NA	NA
HU_HP_UV	NA	NA	NA
HU_HP_CPT	NA	NA	NA
HU_MMS_UV	TTHERM_00137780	PACF1	NA
HU_MMS_CPT	NA	NA	NA
HU_UV_CPT	TTHERM_00561260	NA	NA
IR_HP_MMS	NA	NA	NA
IR_HP_UV	TTHERM_00548330	NA	NA
IR_HP_CPT	NA	NA	NA
IR_MMS_UV	TTHERM_00127110	MRNC29	NA
IR_MMS_CPT	TTHERM_00161390	NA	NA
IR_UV_CPT	TTHERM_00070820	NA	NA
HP_MMS_UV	TTHERM_00647260	NA	NA
HP_MMS_CPT	NA	NA	NA
HP_UV_CPT	NA	NA	NA
MMS_UV_CPT	TTHERM_00140930	NA	NA
HU_IR	TTHERM_00138350	NA	NA
HU_HP	NA	NA	NA
HU_MMS	TTHERM_00316180	DRH40	MTR4.TTHERM_00316180
HU_UV	TTHERM_00128730	TPK2.TTHERM_00128730	TPK2.TTHERM_00128730
HU_CPT	TTHERM_00498150	NA	NA
IR_HP	TTHERM_00470650	PRE7	PRE7.TTHERM_00470650
IR_MMS	TTHERM_00190960	NA	NA
IR_UV	TTHERM_00030310	NA	NA
IR_CPT	TTHERM_00070778	TOK1.TTHERM_00070778	TOK1.TTHERM_00070778
HP_MMS	NA	NA	NA
HP_UV	TTHERM_00194330	CEN7	CDC31.TTHERM_00194330
HP_CPT	NA	NA	NA
MMS_UV	TTHERM_00082230	NA	NA
MMS_CPT	TTHERM_00085220	MRK1	SLT2.TTHERM_00085220
UV_CPT	TTHERM_000502159	NA	NA
HU	TTHERM_00058850	GCV3.TTHERM_00058850	GCV3.TTHERM_00058850
IR	TTHERM_00013240	NA	NA
HP	TTHERM_000773499	NA	NA
MMS	TTHERM_00030490	NA	NA
UV	TTHERM_00006150	OXP1.TTHERM_00006150	OXP1.TTHERM_00006150
CPT	TTHERM_000237670	NA	NA
HU_IR_HP_MMS_UV_CPT	TTHERM_00437590	NA	NA
HU_IR_HP_MMS_UV	NA	NA	NA
HU_IR_HP_MMS_CPT	NA	NA	NA
HU_IR_HP_UV_CPT	NA	NA	NA
HU_IR_MMS_UV_CPT	TTHERM_001128591	NA	NA
HU_HP_MMS_UV_CPT	NA	NA	NA
IR_HP_MMS_UV_CPT	TTHERM_00314970	NA	NA
HU_IR_HP_MMS	NA	NA	NA
HU_IR_HP_UV	NA	NA	NA
HU_IR_HP_CPT	NA	NA	NA
HU_IR_MMS_UV	TTHERM_00187140	DRH9	DRS1.TTHERM_00187140
HU_IR_MMS_CPT	NA	NA	NA
HU_IR_UV_CPT	TTHERM_00502690	CTH30	NA
HU_HP_MMS_UV	NA	NA	NA
HU_HP_MMS_CPT	NA	NA	NA
HU_HP_UV_CPT	NA	NA	NA
HU_MMS_UV_CPT	TTHERM_00572170	NA	NA
IR_HP_MMS_UV	TTHERM_00951800	BPT1.TTHERM_00951800	BPT1.TTHERM_00951800
IR_HP_MMS_CPT	NA	NA	NA
IR_HP_UV_CPT	TTHERM_00895730	NA	NA
IR_MMS_UV_CPT	TTHERM_00127010	NA	NA
HP_MMS_UV_CPT	NA	NA	NA
HU_IR_HP	NA	NA	NA
HU_IR_MMS	TTHERM_00438910	RRN3	RRN3.TTHERM_00438910
HU_IR_UV	TTHERM_00242070	PRP46.TTHERM_00242070	PRP46.TTHERM_00242070
HU_IR_CPT	TTHERM_01372840	NA	NA
HU_HP_MMS	NA	NA	NA
HU_HP_UV	NA	NA	NA
HU_HP_CPT	NA	NA	NA
HU_MMS_UV	TTHERM_00147510	NA	NA
HU_MMS_CPT	NA	NA	NA
HU_UV_CPT	TTHERM_00571800	NA	NA
IR_HP_MMS	NA	NA	NA
IR_HP_UV	TTHERM_00564080	ERV1.TTHERM_00564080	ERV1.TTHERM_00564080
IR_HP_CPT	NA	NA	NA
IR_MMS_UV	TTHERM_00129490	NA	NA
IR_MMS_CPT	TTHERM_00191440	PRC1.TTHERM_00191440	PRC1.TTHERM_00191440
IR_UV_CPT	TTHERM_000760599	NA	NA
HP_MMS_UV	TTHERM_00675770	NA	NA
HP_MMS_CPT	NA	NA	NA
HP_UV_CPT	NA	NA	NA
MMS_UV_CPT	TTHERM_00145790	NA	NA
HU_IR	TTHERM_00161110	NA	NA
HU_HP	NA	NA	NA
HU_MMS	TTHERM_00343440	PHO92.TTHERM_00343440	PHO92.TTHERM_00343440
HU_UV	TTHERM_00142390	NA	NA
HU_CPT	TTHERM_00515220	NA	NA
IR_HP	TTHERM_00471490	RAS1.TTHERM_00471490	RAS1.TTHERM_00471490
IR_MMS	TTHERM_00192150	NA	NA
IR_UV	TTHERM_00030350	NA	NA
IR_CPT	TTHERM_00070910	NA	NA
HP_MMS	NA	NA	NA
HP_UV	TTHERM_00196190	NA	NA
HP_CPT	NA	NA	NA
MMS_UV	TTHERM_000856499	NA	NA
MMS_CPT	TTHERM_00085440	NA	NA
UV_CPT	TTHERM_00051670	PKH2.TTHERM_00051670	PKH2.TTHERM_00051670
HU	TTHERM_00058950	NA	NA
IR	TTHERM_00013360	HOS4.TTHERM_00013360	HOS4.TTHERM_00013360
HP	TTHERM_00077830	NA	NA
MMS	TTHERM_00031710	NA	NA
UV	TTHERM_00006170	NA	NA
CPT	TTHERM_00024060	STE20.TTHERM_00024060	STE20.TTHERM_00024060
HU_IR_HP_MMS_UV_CPT	TTHERM_00449150	NA	NA
HU_IR_HP_MMS_UV	NA	NA	NA
HU_IR_HP_MMS_CPT	NA	NA	NA
HU_IR_HP_UV_CPT	NA	NA	NA
HU_IR_MMS_UV_CPT	TTHERM_00122460	OMS1.TTHERM_00122460	OMS1.TTHERM_00122460
HU_HP_MMS_UV_CPT	NA	NA	NA
IR_HP_MMS_UV_CPT	TTHERM_00316410	RAD3.TTHERM_00316410	RAD3.TTHERM_00316410
HU_IR_HP_MMS	NA	NA	NA
HU_IR_HP_UV	NA	NA	NA
HU_IR_HP_CPT	NA	NA	NA
HU_IR_MMS_UV	TTHERM_00196370	HSP60	HSP60.TTHERM_00196370
HU_IR_MMS_CPT	NA	NA	NA
HU_IR_UV_CPT	TTHERM_00530680	AIP1	NA
HU_HP_MMS_UV	NA	NA	NA
HU_HP_MMS_CPT	NA	NA	NA
HU_HP_UV_CPT	NA	NA	NA
HU_MMS_UV_CPT	TTHERM_00578910	YNL320W.TTHERM_00578910	YNL320W.TTHERM_00578910
IR_HP_MMS_UV	TTHERM_00971710	NA	NA
IR_HP_MMS_CPT	NA	NA	NA
IR_HP_UV_CPT	TTHERM_00947580	MRNO28	NA
IR_MMS_UV_CPT	TTHERM_00131150	BAS1.TTHERM_00131150	BAS1.TTHERM_00131150
HP_MMS_UV_CPT	NA	NA	NA
HU_IR_HP	NA	NA	NA
HU_IR_MMS	TTHERM_00455450	NA	NA
HU_IR_UV	TTHERM_00275790	NA	NA
HU_IR_CPT	NA	NA	NA
HU_HP_MMS	NA	NA	NA
HU_HP_UV	NA	NA	NA
HU_HP_CPT	NA	NA	NA
HU_MMS_UV	TTHERM_00148860	MDV1.TTHERM_00148860	MDV1.TTHERM_00148860
HU_MMS_CPT	NA	NA	NA
HU_UV_CPT	TTHERM_00696990	ARF1.TTHERM_00696990	ARF1.TTHERM_00696990
IR_HP_MMS	NA	NA	NA
IR_HP_UV	TTHERM_00588921	VPS5.TTHERM_00588921	VPS5.TTHERM_00588921
IR_HP_CPT	NA	NA	NA
IR_MMS_UV	TTHERM_00134970	CCT5	CCT5.TTHERM_00134970
IR_MMS_CPT	TTHERM_00191450	TTS1	NA
IR_UV_CPT	TTHERM_00077120	NA	NA
HP_MMS_UV	TTHERM_00688470	DYH6	DYN1.TTHERM_00688470
HP_MMS_CPT	NA	NA	NA
HP_UV_CPT	NA	NA	NA
MMS_UV_CPT	TTHERM_00145900	NA	NA
HU_IR	TTHERM_00185870	SSO2.TTHERM_00185870	SSO2.TTHERM_00185870
HU_HP	NA	NA	NA
HU_MMS	TTHERM_00347950	TOM70.TTHERM_00347950	TOM70.TTHERM_00347950
HU_UV	TTHERM_00150040	NA	NA
HU_CPT	TTHERM_00526310	GRE3.TTHERM_00526310	GRE3.TTHERM_00526310
IR_HP	TTHERM_00525140	NA	NA
IR_MMS	TTHERM_00196350	NA	NA
IR_UV	TTHERM_00030370	NA	NA
IR_CPT	TTHERM_000751040	CMK1.TTHERM_000751040	CMK1.TTHERM_000751040
HP_MMS	NA	NA	NA
HP_UV	TTHERM_00213590	NA	NA
HP_CPT	NA	NA	NA
MMS_UV	TTHERM_000865148	NA	NA
MMS_CPT	TTHERM_000865158	NA	NA
UV_CPT	TTHERM_000522949	NA	NA
HU	TTHERM_000590237	NA	NA
IR	TTHERM_00013550	STI1.TTHERM_00013550	STI1.TTHERM_00013550
HP	TTHERM_00079630	NA	NA
MMS	TTHERM_00035360	YOL075C.TTHERM_00035360	YOL075C.TTHERM_00035360
UV	TTHERM_000069389	NA	NA
CPT	TTHERM_00024310	NA	NA
HU_IR_HP_MMS_UV_CPT	TTHERM_00459400	RLP2	NA
HU_IR_HP_MMS_UV	NA	NA	NA
HU_IR_HP_MMS_CPT	NA	NA	NA
HU_IR_HP_UV_CPT	NA	NA	NA
HU_IR_MMS_UV_CPT	TTHERM_00131240	DRH8	MAK5.TTHERM_00131240
HU_HP_MMS_UV_CPT	NA	NA	NA
IR_HP_MMS_UV_CPT	TTHERM_00332130	NA	NA
HU_IR_HP_MMS	NA	NA	NA
HU_IR_HP_UV	NA	NA	NA
HU_IR_HP_CPT	NA	NA	NA
HU_IR_MMS_UV	TTHERM_00219180	DRH41	HCA4.TTHERM_00219180
HU_IR_MMS_CPT	NA	NA	NA
HU_IR_UV_CPT	TTHERM_00569160	GST20	NA
HU_HP_MMS_UV	NA	NA	NA
HU_HP_MMS_CPT	NA	NA	NA
HU_HP_UV_CPT	NA	NA	NA
HU_MMS_UV_CPT	TTHERM_00691710	NA	NA
IR_HP_MMS_UV	TTHERM_00977740	NA	NA
IR_HP_MMS_CPT	NA	NA	NA
IR_HP_UV_CPT	TTHERM_00971960	NA	NA
IR_MMS_UV_CPT	TTHERM_00133380	NA	NA
HP_MMS_UV_CPT	NA	NA	NA
HU_IR_HP	NA	NA	NA
HU_IR_MMS	TTHERM_00463450	SHM2.TTHERM_00463450	SHM2.TTHERM_00463450
HU_IR_UV	TTHERM_00280990	NA	NA
HU_IR_CPT	NA	NA	NA
HU_HP_MMS	NA	NA	NA
HU_HP_UV	NA	NA	NA
HU_HP_CPT	NA	NA	NA
HU_MMS_UV	TTHERM_00158040	YRB1.TTHERM_00158040	YRB1.TTHERM_00158040
HU_MMS_CPT	NA	NA	NA
HU_UV_CPT	TTHERM_00698680	ZAP1.TTHERM_00698680	ZAP1.TTHERM_00698680
IR_HP_MMS	NA	NA	NA
IR_HP_UV	TTHERM_00632960	NA	NA
IR_HP_CPT	NA	NA	NA
IR_MMS_UV	TTHERM_00151270	OAC1.TTHERM_00151270	OAC1.TTHERM_00151270
IR_MMS_CPT	TTHERM_00194220	NA	NA
IR_UV_CPT	TTHERM_000785819	NA	NA
HP_MMS_UV	TTHERM_00722970	NA	NA
HP_MMS_CPT	NA	NA	NA
HP_UV_CPT	NA	NA	NA
MMS_UV_CPT	TTHERM_00151470	NA	NA
HU_IR	TTHERM_00193710	NA	NA
HU_HP	NA	NA	NA
HU_MMS	TTHERM_00352220	AAP1.TTHERM_00352220	AAP1.TTHERM_00352220
HU_UV	TTHERM_00160960	MRPL4.TTHERM_00160960	MRPL4.TTHERM_00160960
HU_CPT	TTHERM_00529870	NA	NA
IR_HP	TTHERM_00529590	NA	NA
IR_MMS	TTHERM_00201730	NA	NA
IR_UV	TTHERM_000313079	DTX1	NA
IR_CPT	TTHERM_00079000	IMA4	SRP1.TTHERM_00079000
HP_MMS	NA	NA	NA
HP_UV	TTHERM_00225700	NA	NA
HP_CPT	NA	NA	NA
MMS_UV	TTHERM_00088030	ALV2	NA
MMS_CPT	TTHERM_00092810	NA	NA
UV_CPT	TTHERM_00056189	NA	NA
HU	TTHERM_00059250	NA	NA
IR	TTHERM_000145118	TOK1.TTHERM_000145118	TOK1.TTHERM_000145118
HP	TTHERM_00081120	TUL1.TTHERM_00081120	TUL1.TTHERM_00081120
MMS	TTHERM_000374979	NA	NA
UV	TTHERM_000071027	NA	NA
CPT	TTHERM_000245389	NA	NA
HU_IR_HP_MMS_UV_CPT	TTHERM_00653640	SNF1.TTHERM_00653640	SNF1.TTHERM_00653640
HU_IR_HP_MMS_UV	NA	NA	NA
HU_IR_HP_MMS_CPT	NA	NA	NA
HU_IR_HP_UV_CPT	NA	NA	NA
HU_IR_MMS_UV_CPT	TTHERM_00136389	YAR1.TTHERM_00136389	YAR1.TTHERM_00136389
HU_HP_MMS_UV_CPT	NA	NA	NA
IR_HP_MMS_UV_CPT	TTHERM_00348900	NA	NA
HU_IR_HP_MMS	NA	NA	NA
HU_IR_HP_UV	NA	NA	NA
HU_IR_HP_CPT	NA	NA	NA
HU_IR_MMS_UV	TTHERM_00220600	NA	NA
HU_IR_MMS_CPT	NA	NA	NA
HU_IR_UV_CPT	TTHERM_00648940	TAF5.TTHERM_00648940	TAF5.TTHERM_00648940
HU_HP_MMS_UV	NA	NA	NA
HU_HP_MMS_CPT	NA	NA	NA
HU_HP_UV_CPT	NA	NA	NA
HU_MMS_UV_CPT	TTHERM_00703490	APL6.TTHERM_00703490	APL6.TTHERM_00703490
IR_HP_MMS_UV	TTHERM_01060800	NA	NA
IR_HP_MMS_CPT	NA	NA	NA
IR_HP_UV_CPT	TTHERM_01035490	CDK15	CDC28.TTHERM_01035490
IR_MMS_UV_CPT	TTHERM_00133580	NA	NA
HP_MMS_UV_CPT	NA	NA	NA
HU_IR_HP	NA	NA	NA
HU_IR_MMS	TTHERM_00467990	CIA2.TTHERM_00467990	CIA2.TTHERM_00467990
HU_IR_UV	TTHERM_00283360	NA	NA
HU_IR_CPT	NA	NA	NA
HU_HP_MMS	NA	NA	NA
HU_HP_UV	NA	NA	NA
HU_HP_CPT	NA	NA	NA
HU_MMS_UV	TTHERM_00170160	NA	NA
HU_MMS_CPT	NA	NA	NA
HU_UV_CPT	TTHERM_00765170	NA	NA
IR_HP_MMS	NA	NA	NA
IR_HP_UV	TTHERM_00633530	PUP1	PUP1.TTHERM_00633530
IR_HP_CPT	NA	NA	NA
IR_MMS_UV	TTHERM_00152140	IMP4.TTHERM_00152140	IMP4.TTHERM_00152140
IR_MMS_CPT	TTHERM_00194420	CDC27.TTHERM_00194420	CDC27.TTHERM_00194420
IR_UV_CPT	TTHERM_00079060	NA	NA
HP_MMS_UV	TTHERM_00723430	NA	NA
HP_MMS_CPT	NA	NA	NA
HP_UV_CPT	NA	NA	NA
MMS_UV_CPT	TTHERM_00155360	IBA57.TTHERM_00155360	IBA57.TTHERM_00155360
HU_IR	TTHERM_00193847	SRM1.TTHERM_00193847	SRM1.TTHERM_00193847
HU_HP	NA	NA	NA
HU_MMS	TTHERM_00378560	NIP1.TTHERM_00378560	NIP1.TTHERM_00378560
HU_UV	TTHERM_00161050	PRP19	PRP19.TTHERM_00161050
HU_CPT	TTHERM_00572000	GST55	NA
IR_HP	TTHERM_00579220	RAB2D	YPT31.TTHERM_00579220
IR_MMS	TTHERM_00218430	ATM1.TTHERM_00218430	ATM1.TTHERM_00218430
IR_UV	TTHERM_000317059	NA	NA
IR_CPT	TTHERM_000865159	NA	NA
HP_MMS	NA	NA	NA
HP_UV	TTHERM_00225760	NA	NA
HP_CPT	NA	NA	NA
MMS_UV	TTHERM_00101310	TRX1.TTHERM_00101310	TRX1.TTHERM_00101310
MMS_CPT	TTHERM_000929569	NA	NA
UV_CPT	TTHERM_000571587	NA	NA
HU	TTHERM_00059529	ECM18.TTHERM_00059529	ECM18.TTHERM_00059529
IR	TTHERM_000147658	NA	NA
HP	TTHERM_00095440	NA	NA
MMS	TTHERM_00037500	CDC5.TTHERM_00037500	CDC5.TTHERM_00037500
UV	TTHERM_000084989	NA	NA
CPT	TTHERM_00028640	NA	NA
HU_IR_HP_MMS_UV_CPT	TTHERM_00655520	SOD1.TTHERM_00655520	SOD1.TTHERM_00655520
HU_IR_HP_MMS_UV	NA	NA	NA
HU_IR_HP_MMS_CPT	NA	NA	NA
HU_IR_HP_UV_CPT	NA	NA	NA
HU_IR_MMS_UV_CPT	TTHERM_00143690	BBC73	NA
HU_HP_MMS_UV_CPT	NA	NA	NA
IR_HP_MMS_UV_CPT	TTHERM_00391570	REV3.TTHERM_00391570	REV3.TTHERM_00391570
HU_IR_HP_MMS	NA	NA	NA
HU_IR_HP_UV	NA	NA	NA
HU_IR_HP_CPT	NA	NA	NA
HU_IR_MMS_UV	TTHERM_00227240	ABP140.TTHERM_00227240	ABP140.TTHERM_00227240
HU_IR_MMS_CPT	NA	NA	NA
HU_IR_UV_CPT	TTHERM_00661650	GST34	NA
HU_HP_MMS_UV	NA	NA	NA
HU_HP_MMS_CPT	NA	NA	NA
HU_HP_UV_CPT	NA	NA	NA
HU_MMS_UV_CPT	TTHERM_00723200	SRM1.TTHERM_00723200	SRM1.TTHERM_00723200
IR_HP_MMS_UV	TTHERM_01151450	STE6.TTHERM_01151450	STE6.TTHERM_01151450
IR_HP_MMS_CPT	NA	NA	NA
IR_HP_UV_CPT	TTHERM_01138260	NA	NA
IR_MMS_UV_CPT	TTHERM_00134770	FMP41.TTHERM_00134770	FMP41.TTHERM_00134770
HP_MMS_UV_CPT	NA	NA	NA
HU_IR_HP	NA	NA	NA
HU_IR_MMS	TTHERM_00474930	NA	NA
HU_IR_UV	TTHERM_00290980	HUL5.TTHERM_00290980	HUL5.TTHERM_00290980
HU_IR_CPT	NA	NA	NA
HU_HP_MMS	NA	NA	NA
HU_HP_UV	NA	NA	NA
HU_HP_CPT	NA	NA	NA
HU_MMS_UV	TTHERM_00185230	TPI1.TTHERM_00185230	TPI1.TTHERM_00185230
HU_MMS_CPT	NA	NA	NA
HU_UV_CPT	TTHERM_00794370	GST26	NA
IR_HP_MMS	NA	NA	NA
IR_HP_UV	TTHERM_00647310	GIN4.TTHERM_00647310	GIN4.TTHERM_00647310
IR_HP_CPT	NA	NA	NA
IR_MMS_UV	TTHERM_00160670	ENP2.TTHERM_00160670	ENP2.TTHERM_00160670
IR_MMS_CPT	TTHERM_00221120	GRT1	NA
IR_UV_CPT	TTHERM_00079120	NA	NA
HP_MMS_UV	TTHERM_00726360	YBR062C.TTHERM_00726360	YBR062C.TTHERM_00726360
HP_MMS_CPT	NA	NA	NA
HP_UV_CPT	NA	NA	NA
MMS_UV_CPT	TTHERM_00155380	BBC57	NA
HU_IR	TTHERM_00194530	NA	NA
HU_HP	NA	NA	NA
HU_MMS	TTHERM_00405450	GST11	NA
HU_UV	TTHERM_00171760	NA	NA
HU_CPT	TTHERM_00629840	NA	NA
IR_HP	TTHERM_00637010	EPB1	NA
IR_MMS	TTHERM_00241950	NA	NA
IR_UV	TTHERM_000324519	MDN1.TTHERM_000324519	MDN1.TTHERM_000324519
IR_CPT	TTHERM_000932029	DGA1.TTHERM_000932029	DGA1.TTHERM_000932029
HP_MMS	NA	NA	NA
HP_UV	TTHERM_00239080	YKR035W.TTHERM_00239080	YKR035W.TTHERM_00239080
HP_CPT	NA	NA	NA
MMS_UV	TTHERM_00105030	IST2.TTHERM_00105030	IST2.TTHERM_00105030
MMS_CPT	TTHERM_000930818	NA	NA
UV_CPT	TTHERM_000571679	NA	NA
HU	TTHERM_000627129	NA	NA
IR	TTHERM_000149659	NA	NA
HP	TTHERM_000998881	NA	NA
MMS	TTHERM_00040340	IGR4	NA
UV	TTHERM_000085339	MKK1.TTHERM_000085339	MKK1.TTHERM_000085339
CPT	TTHERM_00028890	NA	NA
HU_IR_HP_MMS_UV_CPT	TTHERM_00695650	ACS1.TTHERM_00695650	ACS1.TTHERM_00695650
HU_IR_HP_MMS_UV	NA	NA	NA
HU_IR_HP_MMS_CPT	NA	NA	NA
HU_IR_HP_UV_CPT	NA	NA	NA
HU_IR_MMS_UV_CPT	TTHERM_00151380	NA	NA
HU_HP_MMS_UV_CPT	NA	NA	NA
IR_HP_MMS_UV_CPT	TTHERM_00420990	SRM1.TTHERM_00420990	SRM1.TTHERM_00420990
HU_IR_HP_MMS	NA	NA	NA
HU_IR_HP_UV	NA	NA	NA
HU_IR_HP_CPT	NA	NA	NA
HU_IR_MMS_UV	TTHERM_00237560	ACS1.TTHERM_00237560	ACS1.TTHERM_00237560
HU_IR_MMS_CPT	NA	NA	NA
HU_IR_UV_CPT	TTHERM_00799180	NA	NA
HU_HP_MMS_UV	NA	NA	NA
HU_HP_MMS_CPT	NA	NA	NA
HU_HP_UV_CPT	NA	NA	NA
HU_MMS_UV_CPT	TTHERM_00790790	HTA1	HTA2.TTHERM_00790790
IR_HP_MMS_UV	TTHERM_01164150	NA	NA
IR_HP_MMS_CPT	NA	NA	NA
IR_HP_UV_CPT	TTHERM_01179940	NA	NA
IR_MMS_UV_CPT	TTHERM_00142270	RGA1.TTHERM_00142270	RGA1.TTHERM_00142270
HP_MMS_UV_CPT	NA	NA	NA
HU_IR_HP	NA	NA	NA
HU_IR_MMS	TTHERM_00492920	HOS4.TTHERM_00492920	HOS4.TTHERM_00492920
HU_IR_UV	TTHERM_00312020	NA	NA
HU_IR_CPT	NA	NA	NA
HU_HP_MMS	NA	NA	NA
HU_HP_UV	NA	NA	NA
HU_HP_CPT	NA	NA	NA
HU_MMS_UV	TTHERM_00185640	JMJ1	NA
HU_MMS_CPT	NA	NA	NA
HU_UV_CPT	TTHERM_00862690	NA	NA
IR_HP_MMS	NA	NA	NA
IR_HP_UV	TTHERM_00666560	PRE6	PRE6.TTHERM_00666560
IR_HP_CPT	NA	NA	NA
IR_MMS_UV	TTHERM_00188860	NAS2.TTHERM_00188860	NAS2.TTHERM_00188860
IR_MMS_CPT	TTHERM_00227670	NA	NA
IR_UV_CPT	TTHERM_00079210	NA	NA
HP_MMS_UV	TTHERM_00732800	NA	NA
HP_MMS_CPT	NA	NA	NA
HP_UV_CPT	NA	NA	NA
MMS_UV_CPT	TTHERM_001663099	FPK1.TTHERM_001663099	FPK1.TTHERM_001663099
HU_IR	TTHERM_00194650	TRS1	THS1.TTHERM_00194650
HU_HP	NA	NA	NA
HU_MMS	TTHERM_00405500	GST7	NA
HU_UV	TTHERM_00188350	NA	NA
[truncated: 121,670 more rows]

## Sheet: README
Supplemental Table S4. Overlapping dynamic transcripts
