# Supplementary material for: A systems view on DNA damage response kinetics in Tetrahymena
Source: HighWire-hosted journal article supplement (doi:10.1101/gr.281000.125), 2026-01-28
Supplement: Supplemental_Table_S5.xlsx [file Supplemental_Table_S5.xlsx]

## Sheet: Supplemental_Table_S5_StatsOver
Intersections	Degree	Observed.Overlap	Expected.Overlap	FE	P.value	significant
UV	1	986	NA	NA	NA	NA
MMS	1	900	NA	NA	NA	NA
MMS & UV	2	320	343.687	0.93108	0.980285	FALSE
IR	1	631	NA	NA	NA	NA
IR & UV	2	354	240.963	1.46911	4.53295298807126e-26	TRUE
IR & MMS	2	249	219.946	1.1321	0.0031676	TRUE
IR & MMS & UV	3	182	83.9917	2.16688	4.71512079332959e-29	TRUE
HU	1	349	NA	NA	NA	NA
HU & UV	2	171	133.274	1.28307	6.39567080862735e-06	TRUE
HU & MMS	2	160	121.65	1.31525	3.34669941567177e-06	TRUE
HU & MMS & UV	3	92	46.455	1.98041	8.87347991895245e-12	TRUE
HU & IR	2	171	85.2901	2.00492	3.39473288668197e-27	TRUE
HU & IR & UV	3	111	32.5701	3.40803	6.80677306533441e-35	TRUE
HU & IR & MMS	3	90	29.7293	3.02732	1.22629611049344e-23	TRUE
HU & IR & MMS & UV	4	64	11.3529	5.63734	1.03356070127211e-30	TRUE
HP	1	558	NA	NA	NA	NA
HP & UV	2	198	213.086	0.929202	0.937867	FALSE
HP & MMS	2	300	194.5	1.54241	2.23563159132135e-25	TRUE
HP & MMS & UV	3	130	74.2747	1.75026	4.45548509082007e-12	TRUE
HP & IR	2	141	136.366	1.03398	0.321276	FALSE
HP & IR & UV	3	95	52.0748	1.8243	9.07012913663929e-10	TRUE
HP & IR & MMS	3	105	47.5328	2.209	2.18064347119153e-16	TRUE
HP & IR & MMS & UV	4	77	18.1516	4.24206	2.44803665270018e-28	TRUE
HP & HU	2	96	75.4229	1.27282	0.00298315	TRUE
HP & HU & UV	3	66	28.8021	2.2915	3.70297650195239e-11	TRUE
HP & HU & MMS	3	74	26.2899	2.81476	2.45163148079379e-17	TRUE
HP & HU & MMS & UV	4	52	10.0395	5.17956	4.01392790710051e-23	TRUE
HP & HU & IR	3	58	18.4322	3.14667	1.21762122424794e-15	TRUE
HP & HU & IR & UV	4	41	7.03878	5.82488	4.43504173893056e-20	TRUE
HP & HU & IR & MMS	4	49	6.42485	7.62664	3.15495824269816e-29	TRUE
HP & HU & IR & MMS & UV	5	36	2.45349	14.673	5.44549671370975e-31	TRUE
CPT	1	1470	NA	NA	NA	NA
CPT & UV	2	541	561.356	0.963739	0.955933	FALSE
CPT & MMS	2	474	512.393	0.92507	0.999402	FALSE
CPT & MMS & UV	3	248	195.67	1.26744	1.4188272438976e-06	TRUE
CPT & IR	2	376	359.245	1.04664	0.0661705	FALSE
CPT & IR & UV	3	256	137.186	1.86607	3.47789391165554e-32	TRUE
CPT & IR & MMS	3	193	125.221	1.54128	1.18292217222037e-12	TRUE
CPT & IR & MMS & UV	4	153	47.8187	3.19959	2.98570226769328e-43	TRUE
CPT & HU	2	188	198.695	0.946175	0.903223	FALSE
CPT & HU & UV	3	127	75.8765	1.67377	3.56162600764323e-11	TRUE
CPT & HU & MMS	3	98	69.2585	1.41499	6.52514266444711e-05	TRUE
CPT & HU & MMS & UV	4	75	26.448	2.83575	1.94332292010568e-17	TRUE
CPT & HU & IR	3	112	48.5579	2.30653	4.33992319834963e-20	TRUE
CPT & HU & IR & UV	4	86	18.543	4.63787	1.15561324268492e-35	TRUE
CPT & HU & IR & MMS	4	69	16.9257	4.07665	8.72816063993398e-25	TRUE
CPT & HU & IR & MMS & UV	5	56	6.46348	8.66406	3.62840546014505e-36	TRUE
CPT & HP	2	240	317.684	0.755468	1	FALSE
CPT & HP & UV	3	136	121.315	1.12104	0.0591596	FALSE
CPT & HP & MMS	3	162	110.734	1.46296	1.13385307953208e-08	TRUE
CPT & HP & MMS & UV	4	102	42.2865	2.41211	3.66506979224236e-18	TRUE
CPT & HP & IR	3	100	77.6369	1.28805	0.00255299	TRUE
CPT & HP & IR & UV	4	78	29.6476	2.63091	6.37076885258936e-16	TRUE
CPT & HP & IR & MMS	4	79	27.0617	2.91926	8.8774052255615e-19	TRUE
CPT & HP & IR & MMS & UV	5	65	10.3342	6.28982	2.46526219292922e-33	TRUE
CPT & HP & HU	3	61	42.9402	1.42058	0.00205656	TRUE
CPT & HP & HU & UV	4	54	16.3978	3.29313	3.16909023338714e-15	TRUE
CPT & HP & HU & MMS	4	50	14.9676	3.34056	2.39228792471679e-14	TRUE
CPT & HP & HU & MMS & UV	5	45	5.71573	7.87302	3.15328201941708e-27	TRUE
CPT & HP & HU & IR	4	40	10.4939	3.81173	2.17236134208948e-13	TRUE
CPT & HP & HU & IR & UV	5	35	4.00736	8.73393	1.0872655074953e-22	TRUE
CPT & HP & HU & IR & MMS	5	35	3.65783	9.56851	5.58077684974156e-24	TRUE
CPT & HP & HU & IR & MMS & UV	6	32	1.39683	22.909	1.54551563426855e-33	TRUE

## Sheet: README
Supplemental Table S5. Fisher’s exact test results for overlap between dynamic proteins in different DNA damage treatments
