# Supplementary material for: A systems view on DNA damage response kinetics in Tetrahymena
Source: HighWire-hosted journal article supplement (doi:10.1101/gr.281000.125), 2026-01-28
Supplement: Supplemental_Table_S6.xlsx [file Supplemental_Table_S6.xlsx]

## Sheet: Supplemental_Table_S6
name	value	Gene.Name	yeast_ttherm
CPT_HP_HU_IR_MMS_UV	TTHERM_000516399	PAN1.TTHERM_000516399	PAN1.TTHERM_000516399
CPT_HP_HU_IR_MMS	TTHERM_00079820	NA	NA
CPT_HP_HU_IR_UV	TTHERM_00188700	NA	NA
CPT_HP_HU_MMS_UV	TTHERM_000377351	NA	NA
CPT_HP_IR_MMS_UV	TTHERM_00024410	NA	NA
CPT_HU_IR_MMS_UV	TTHERM_00034920	YOL075C.TTHERM_00034920	YOL075C.TTHERM_00034920
HP_HU_IR_MMS_UV	TTHERM_000051979	NA	NA
CPT_HP_HU_IR	TTHERM_00405520	JLP1.TTHERM_00405520	JLP1.TTHERM_00405520
CPT_HP_HU_MMS	TTHERM_00534030	NA	NA
CPT_HP_HU_UV	TTHERM_00037640	PET9.TTHERM_00037640	PET9.TTHERM_00037640
CPT_HP_IR_MMS	TTHERM_000457109	ROT2.TTHERM_000457109	ROT2.TTHERM_000457109
CPT_HP_IR_UV	TTHERM_00143530	PSH1.TTHERM_00143530	PSH1.TTHERM_00143530
CPT_HP_MMS_UV	TTHERM_00046490	HIR1	HIR1.TTHERM_00046490
CPT_HU_IR_MMS	TTHERM_000391439	NA	NA
CPT_HU_IR_UV	TTHERM_00011670	CDK3	CTK1.TTHERM_00011670
CPT_HU_MMS_UV	TTHERM_00059529	ECM18.TTHERM_00059529	ECM18.TTHERM_00059529
CPT_IR_MMS_UV	TTHERM_00008690	NA	NA
HP_HU_IR_MMS	TTHERM_00046090	GPX8	GPX2.TTHERM_00046090
HP_HU_IR_UV	TTHERM_00264760	NA	NA
HP_HU_MMS_UV	TTHERM_00052170	GLO2.TTHERM_00052170	GLO2.TTHERM_00052170
HP_IR_MMS_UV	TTHERM_00058590	FBP1	FBP1.TTHERM_00058590
HU_IR_MMS_UV	TTHERM_00031790	YOL075C.TTHERM_00031790	YOL075C.TTHERM_00031790
CPT_HP_IR	TTHERM_000043960	YJR149W.TTHERM_000043960	YJR149W.TTHERM_000043960
CPT_HP_MMS	TTHERM_00011400	BAS1.TTHERM_00011400	BAS1.TTHERM_00011400
CPT_HP_UV	TTHERM_00011730	MRF1.TTHERM_00011730	MRF1.TTHERM_00011730
CPT_HU_IR	TTHERM_00046840	NA	NA
CPT_HU_MMS	TTHERM_00079610	NA	NA
CPT_HU_UV	TTHERM_000310208	NA	NA
CPT_IR_MMS	TTHERM_000032869	YOL075C.TTHERM_000032869	YOL075C.TTHERM_000032869
CPT_IR_UV	TTHERM_000030229	NA	NA
CPT_MMS_UV	TTHERM_00006060	PARP7	NA
HP_HU_IR	TTHERM_00149640	MSS4.TTHERM_00149640	MSS4.TTHERM_00149640
HP_HU_MMS	TTHERM_000470733	NA	NA
HP_HU_UV	TTHERM_00469190	YIA6.TTHERM_00469190	YIA6.TTHERM_00469190
HP_IR_MMS	TTHERM_00066860	CDK17	CTK1.TTHERM_00066860
HP_IR_UV	TTHERM_00129830	HEX1	NA
HP_MMS_UV	TTHERM_00011190	NA	NA
HU_IR_MMS	TTHERM_000138049	NA	NA
HU_IR_UV	TTHERM_00075680	NA	NA
HU_MMS_UV	TTHERM_00219050	MXR1	MXR1.TTHERM_00219050
IR_MMS_UV	TTHERM_00052280	CMD1.TTHERM_00052280	CMD1.TTHERM_00052280
CPT_HP	TTHERM_00085300	IRC24.TTHERM_00085300	IRC24.TTHERM_00085300
CPT_HU	TTHERM_00006070	PARP8	NA
CPT_IR	TTHERM_00030320	MCP2.TTHERM_00030320	MCP2.TTHERM_00030320
CPT_MMS	TTHERM_000079459	NA	NA
CPT_UV	TTHERM_000028549	RNR1.TTHERM_000028549	RNR1.TTHERM_000028549
HP_HU	TTHERM_00189419	NA	NA
HP_IR	TTHERM_00266700	NA	NA
HP_MMS	TTHERM_00006380	NA	NA
HP_UV	TTHERM_000193899	NA	NA
HU_IR	TTHERM_00125358	UBA1.TTHERM_00125358	UBA1.TTHERM_00125358
HU_MMS	TTHERM_00028640	NA	NA
HU_UV	TTHERM_000486877	RRM30	NOP13.TTHERM_000486877
IR_MMS	TTHERM_00083310	FAA2.TTHERM_00083310	FAA2.TTHERM_00083310
IR_UV	TTHERM_000151707	NA	NA
MMS_UV	TTHERM_00091740	NA	NA
CPT	TTHERM_000014929	NA	NA
HP	TTHERM_00011030	NA	NA
HU	TTHERM_000252299	NA	NA
IR	TTHERM_000046129	YIP5.TTHERM_000046129	YIP5.TTHERM_000046129
MMS	TTHERM_000046378	APL5.TTHERM_000046378	APL5.TTHERM_000046378
UV	TTHERM_00001200	HXT7.TTHERM_00001200	HXT7.TTHERM_00001200
CPT_HP_HU_IR_MMS_UV	TTHERM_00107040	KDX1.TTHERM_00107040	KDX1.TTHERM_00107040
CPT_HP_HU_IR_MMS	TTHERM_00102820	NA	NA
CPT_HP_HU_IR_UV	TTHERM_00421040	NA	NA
CPT_HP_HU_MMS_UV	TTHERM_00105090	PLP1.TTHERM_00105090	PLP1.TTHERM_00105090
CPT_HP_IR_MMS_UV	TTHERM_00043770	GAL5	NA
CPT_HU_IR_MMS_UV	TTHERM_000561429	NA	NA
HP_HU_IR_MMS_UV	TTHERM_00399190	NA	NA
CPT_HP_HU_IR	TTHERM_00455290	NA	NA
CPT_HP_HU_MMS	TTHERM_00755820	NA	NA
CPT_HP_HU_UV	TTHERM_00046950	NA	NA
CPT_HP_IR_MMS	TTHERM_00086780	CCF12	NA
CPT_HP_IR_UV	TTHERM_00143770	IPP1.TTHERM_00143770	IPP1.TTHERM_00143770
CPT_HP_MMS_UV	TTHERM_000523058	NA	NA
CPT_HU_IR_MMS	TTHERM_00145090	ETR1.TTHERM_00145090	ETR1.TTHERM_00145090
CPT_HU_IR_UV	TTHERM_000245449	PWP2.TTHERM_000245449	PWP2.TTHERM_000245449
CPT_HU_MMS_UV	TTHERM_00074310	GIN4.TTHERM_00074310	GIN4.TTHERM_00074310
CPT_IR_MMS_UV	TTHERM_00030430	PARP3	NA
HP_HU_IR_MMS	TTHERM_00046110	GPX7	GPX2.TTHERM_00046110
HP_HU_IR_UV	TTHERM_00971980	NA	NA
HP_HU_MMS_UV	TTHERM_000661568	NA	NA
HP_IR_MMS_UV	TTHERM_00129510	NA	NA
HU_IR_MMS_UV	TTHERM_00516420	GST29	NA
CPT_HP_IR	TTHERM_00220830	NA	NA
CPT_HP_MMS	TTHERM_00050570	NA	NA
CPT_HP_UV	TTHERM_00013140	CYC8.TTHERM_00013140	CYC8.TTHERM_00013140
CPT_HU_IR	TTHERM_00254560	VPS13.TTHERM_00254560	VPS13.TTHERM_00254560
CPT_HU_MMS	TTHERM_00268060	CTH110	NA
CPT_HU_UV	TTHERM_00035490	NA	NA
CPT_IR_MMS	TTHERM_000268319	YTA6.TTHERM_000268319	YTA6.TTHERM_000268319
CPT_IR_UV	TTHERM_000279829	HYR1.TTHERM_000279829	HYR1.TTHERM_000279829
CPT_MMS_UV	TTHERM_00031680	THD7	UBP14.TTHERM_00031680
HP_HU_IR	TTHERM_00415620	NA	NA
HP_HU_MMS	TTHERM_00142420	GLR1.TTHERM_00142420	GLR1.TTHERM_00142420
HP_HU_UV	TTHERM_00727670	NA	NA
HP_IR_MMS	TTHERM_00320230	LIH1.TTHERM_00320230	LIH1.TTHERM_00320230
HP_IR_UV	TTHERM_00134870	NA	NA
HP_MMS_UV	TTHERM_00094310	NA	NA
HU_IR_MMS	TTHERM_00112480	THD15	HST2.TTHERM_00112480
HU_IR_UV	TTHERM_00137790	NA	NA
HU_MMS_UV	TTHERM_00310560	NA	NA
IR_MMS_UV	TTHERM_00136330	MXR2	MXR2.TTHERM_00136330
CPT_HP	TTHERM_00136050	NA	NA
CPT_HU	TTHERM_00030310	NA	NA
CPT_IR	TTHERM_000437538	DIT2.TTHERM_000437538	DIT2.TTHERM_000437538
CPT_MMS	TTHERM_00016060	YMR226C.TTHERM_00016060	YMR226C.TTHERM_00016060
CPT_UV	TTHERM_000086966	NA	NA
HP_HU	TTHERM_00375120	TRS31.TTHERM_00375120	TRS31.TTHERM_00375120
HP_IR	TTHERM_00313400	TGL9	TGL1.TTHERM_00313400
HP_MMS	TTHERM_00035180	NA	NA
HP_UV	TTHERM_000268328	CYC8.TTHERM_000268328	CYC8.TTHERM_000268328
HU_IR	TTHERM_00144860	PHB1.TTHERM_00144860	PHB1.TTHERM_00144860
HU_MMS	TTHERM_000723629	GLR1.TTHERM_000723629	GLR1.TTHERM_000723629
HU_UV	TTHERM_00050520	NA	NA
IR_MMS	TTHERM_00202960	NA	NA
IR_UV	TTHERM_000314980	NA	NA
MMS_UV	TTHERM_001075589	NA	NA
CPT	TTHERM_00002660	LIH1.TTHERM_00002660	LIH1.TTHERM_00002660
HP	TTHERM_00011760	RPC19	RPC19.TTHERM_00011760
HU	TTHERM_00052260	MDH3	MDH2.TTHERM_00052260
IR	TTHERM_000085179	NA	NA
MMS	TTHERM_00006140	NA	NA
UV	TTHERM_00001420	SRVW1	NA
CPT_HP_HU_IR_MMS_UV	TTHERM_00142330	RAD51	RAD51.TTHERM_00142330
CPT_HP_HU_IR_MMS	TTHERM_00630010	GPX1	GPX2.TTHERM_00630010
CPT_HP_HU_IR_UV	TTHERM_00971970	NA	NA
CPT_HP_HU_MMS_UV	TTHERM_00128730	TPK2.TTHERM_00128730	TPK2.TTHERM_00128730
CPT_HP_IR_MMS_UV	TTHERM_000455599	NA	NA
CPT_HU_IR_MMS_UV	TTHERM_00070980	POX1.TTHERM_00070980	POX1.TTHERM_00070980
HP_HU_IR_MMS_UV	TTHERM_00653790	NA	NA
CPT_HP_HU_IR	NA	NA	NA
CPT_HP_HU_MMS	NA	NA	NA
CPT_HP_HU_UV	TTHERM_00242189	MSS1.TTHERM_00242189	MSS1.TTHERM_00242189
CPT_HP_IR_MMS	TTHERM_001228989	NA	NA
CPT_HP_IR_UV	TTHERM_00295400	MTO1.TTHERM_00295400	MTO1.TTHERM_00295400
CPT_HP_MMS_UV	TTHERM_00075780	NA	NA
CPT_HU_IR_MMS	TTHERM_00242370	RNR2.TTHERM_00242370	RNR2.TTHERM_00242370
CPT_HU_IR_UV	TTHERM_00056010	NA	NA
CPT_HU_MMS_UV	TTHERM_00242240	NA	NA
CPT_IR_MMS_UV	TTHERM_00039240	HEL1.TTHERM_00039240	HEL1.TTHERM_00039240
HP_HU_IR_MMS	TTHERM_00048900	NA	NA
HP_HU_IR_UV	NA	NA	NA
HP_HU_MMS_UV	TTHERM_00575390	MAI63	GTT2.TTHERM_00575390
HP_IR_MMS_UV	TTHERM_00241880	YND1.TTHERM_00241880	YND1.TTHERM_00241880
HU_IR_MMS_UV	TTHERM_00569160	GST20	NA
CPT_HP_IR	TTHERM_00237520	NA	NA
CPT_HP_MMS	TTHERM_000549639	SMX3.TTHERM_000549639	SMX3.TTHERM_000549639
CPT_HP_UV	TTHERM_00035290	SEC3.TTHERM_00035290	SEC3.TTHERM_00035290
CPT_HU_IR	TTHERM_00343370	NA	NA
CPT_HU_MMS	TTHERM_00372410	ETR1.TTHERM_00372410	ETR1.TTHERM_00372410
CPT_HU_UV	TTHERM_001106135	NA	NA
CPT_IR_MMS	TTHERM_000284239	NA	NA
CPT_IR_UV	TTHERM_00043940	PEX12.TTHERM_00043940	PEX12.TTHERM_00043940
CPT_MMS_UV	TTHERM_000348879	NA	NA
HP_HU_IR	NA	NA	NA
HP_HU_MMS	TTHERM_00145330	NA	NA
HP_HU_UV	TTHERM_00765110	NA	NA
HP_IR_MMS	TTHERM_00473020	GRL2	NA
HP_IR_UV	TTHERM_00193890	YIP5.TTHERM_00193890	YIP5.TTHERM_00193890
HP_MMS_UV	TTHERM_00120880	NA	NA
HU_IR_MMS	TTHERM_00554190	TDH2	TDH1.TTHERM_00554190
HU_IR_UV	TTHERM_001474496	PET8.TTHERM_001474496	PET8.TTHERM_001474496
HU_MMS_UV	TTHERM_00558230	YOR1.TTHERM_00558230	YOR1.TTHERM_00558230
IR_MMS_UV	TTHERM_00155600	NA	NA
CPT_HP	TTHERM_00138340	NA	NA
CPT_HU	TTHERM_00046140	NA	NA
CPT_IR	TTHERM_00052040	NA	NA
CPT_MMS	TTHERM_000194439	NA	NA
CPT_UV	TTHERM_000092809	NA	NA
HP_HU	TTHERM_00732720	CRG1.TTHERM_00732720	CRG1.TTHERM_00732720
HP_IR	TTHERM_00374970	FAA2.TTHERM_00374970	FAA2.TTHERM_00374970
HP_MMS	TTHERM_000420919	NA	NA
HP_UV	TTHERM_00079780	HRR25.TTHERM_00079780	HRR25.TTHERM_00079780
HU_IR	TTHERM_00316940	ERC1.TTHERM_00316940	ERC1.TTHERM_00316940
HU_MMS	TTHERM_00077599	YCR102C.TTHERM_00077599	YCR102C.TTHERM_00077599
HU_UV	TTHERM_00312870	NA	NA
IR_MMS	TTHERM_00213630	NA	NA
IR_UV	TTHERM_00037210	RAD5	RAD5.TTHERM_00037210
MMS_UV	TTHERM_00125340	CSR1.TTHERM_00125340	CSR1.TTHERM_00125340
CPT	TTHERM_00004830	SSF2.TTHERM_00004830	SSF2.TTHERM_00004830
HP	TTHERM_000129647	NA	NA
HU	TTHERM_00052620	OLE2	OLE1.TTHERM_00052620
IR	TTHERM_00011710	CTH2	PEP4.TTHERM_00011710
MMS	TTHERM_00011880	NA	NA
UV	TTHERM_00001430	NA	NA
CPT_HP_HU_IR_MMS_UV	TTHERM_00144970	NA	NA
CPT_HP_HU_IR_MMS	NA	NA	NA
CPT_HP_HU_IR_UV	NA	NA	NA
CPT_HP_HU_MMS_UV	TTHERM_00131330	CUZ1.TTHERM_00131330	CUZ1.TTHERM_00131330
CPT_HP_IR_MMS_UV	TTHERM_00052480	NA	NA
CPT_HU_IR_MMS_UV	TTHERM_00151390	NA	NA
HP_HU_IR_MMS_UV	TTHERM_00695590	NA	NA
CPT_HP_HU_IR	NA	NA	NA
CPT_HP_HU_MMS	NA	NA	NA
CPT_HP_HU_UV	TTHERM_00423380	STE6.TTHERM_00423380	STE6.TTHERM_00423380
CPT_HP_IR_MMS	TTHERM_00283760	NA	NA
CPT_HP_IR_UV	TTHERM_00374900	FAA2.TTHERM_00374900	FAA2.TTHERM_00374900
CPT_HP_MMS_UV	TTHERM_00127110	MRNC29	NA
CPT_HU_IR_MMS	TTHERM_00250970	GSH1.TTHERM_00250970	GSH1.TTHERM_00250970
CPT_HU_IR_UV	TTHERM_000621589	NA	NA
CPT_HU_MMS_UV	TTHERM_00378660	NA	NA
CPT_IR_MMS_UV	TTHERM_000497639	NA	NA
HP_HU_IR_MMS	TTHERM_00148700	CYC1.TTHERM_00148700	CYC1.TTHERM_00148700
HP_HU_IR_UV	NA	NA	NA
HP_HU_MMS_UV	NA	NA	NA
HP_IR_MMS_UV	TTHERM_00389800	YKR035W.TTHERM_00389800	YKR035W.TTHERM_00389800
HU_IR_MMS_UV	TTHERM_00794600	APN2	APN2.TTHERM_00794600
CPT_HP_IR	TTHERM_00329770	NA	NA
CPT_HP_MMS	TTHERM_00122500	NA	NA
CPT_HP_UV	TTHERM_000446568	YPL183W.TTHERM_000446568	YPL183W.TTHERM_000446568
CPT_HU_IR	TTHERM_00391440	THI80.TTHERM_00391440	THI80.TTHERM_00391440
CPT_HU_MMS	TTHERM_00538900	PHS1.TTHERM_00538900	PHS1.TTHERM_00538900
CPT_HU_UV	TTHERM_001266113	GOT1.TTHERM_001266113	GOT1.TTHERM_001266113
CPT_IR_MMS	TTHERM_000312879	NA	NA
CPT_IR_UV	TTHERM_000711791	NA	NA
CPT_MMS_UV	TTHERM_000378989	POT1	NA
HP_HU_IR	NA	NA	NA
HP_HU_MMS	TTHERM_00334320	NA	NA
HP_HU_UV	NA	NA	NA
HP_IR_MMS	TTHERM_00494530	NA	NA
HP_IR_UV	NA	NA	NA
HP_MMS_UV	TTHERM_00133600	NA	NA
HU_IR_MMS	NA	NA	NA
HU_IR_UV	TTHERM_00194040	NA	NA
HU_MMS_UV	TTHERM_00569200	GST19	NA
IR_MMS_UV	TTHERM_00274620	GST22	NA
CPT_HP	TTHERM_00149570	NA	NA
CPT_HU	TTHERM_00139680	PKH2.TTHERM_00139680	PKH2.TTHERM_00139680
CPT_IR	TTHERM_000655859	NA	NA
CPT_MMS	TTHERM_000294698	NA	NA
CPT_UV	TTHERM_00013100	JAC1.TTHERM_00013100	JAC1.TTHERM_00013100
HP_HU	TTHERM_00992740	RPA43.TTHERM_00992740	RPA43.TTHERM_00992740
HP_IR	TTHERM_00494140	RPL18B.TTHERM_00494140	RPL18B.TTHERM_00494140
HP_MMS	TTHERM_00046480	ENO2	ENO1.TTHERM_00046480
HP_UV	TTHERM_00085050	NA	NA
HU_IR	TTHERM_00374930	YPR147C.TTHERM_00374930	YPR147C.TTHERM_00374930
HU_MMS	TTHERM_00078940	MRNC47	NA
HU_UV	TTHERM_00317120	NA	NA
IR_MMS	TTHERM_00353379	NA	NA
IR_UV	TTHERM_000442849	GAL83.TTHERM_000442849	GAL83.TTHERM_000442849
MMS_UV	TTHERM_00161740	RRM4	NA
CPT	TTHERM_00011449	NA	NA
HP	TTHERM_00016370	YNL035C.TTHERM_00016370	YNL035C.TTHERM_00016370
HU	TTHERM_000530016	NA	NA
IR	TTHERM_00016340	NA	NA
MMS	TTHERM_00013170	DIP2.TTHERM_00013170	DIP2.TTHERM_00013170
UV	TTHERM_00006230	DGA1.TTHERM_00006230	DGA1.TTHERM_00006230
CPT_HP_HU_IR_MMS_UV	TTHERM_00148760	SDO1.TTHERM_00148760	SDO1.TTHERM_00148760
CPT_HP_HU_IR_MMS	NA	NA	NA
CPT_HP_HU_IR_UV	NA	NA	NA
CPT_HP_HU_MMS_UV	TTHERM_00144960	NA	NA
CPT_HP_IR_MMS_UV	TTHERM_00066830	CBSB1	NA
CPT_HU_IR_MMS_UV	TTHERM_00196130	CYB2.TTHERM_00196130	CYB2.TTHERM_00196130
HP_HU_IR_MMS_UV	NA	NA	NA
CPT_HP_HU_IR	NA	NA	NA
CPT_HP_HU_MMS	NA	NA	NA
CPT_HP_HU_UV	TTHERM_00522380	YML096W.TTHERM_00522380	YML096W.TTHERM_00522380
CPT_HP_IR_MMS	TTHERM_00314860	IGR7	NA
CPT_HP_IR_UV	TTHERM_00444590	FCF2.TTHERM_00444590	FCF2.TTHERM_00444590
CPT_HP_MMS_UV	TTHERM_00138190	NA	NA
CPT_HU_IR_MMS	TTHERM_00349120	FAA2.TTHERM_00349120	FAA2.TTHERM_00349120
CPT_HU_IR_UV	TTHERM_00077420	NA	NA
CPT_HU_MMS_UV	TTHERM_00951730	BPT1.TTHERM_00951730	BPT1.TTHERM_00951730
CPT_IR_MMS_UV	TTHERM_00052680	NA	NA
HP_HU_IR_MMS	TTHERM_00346460	SAF2	NA
HP_HU_IR_UV	NA	NA	NA
HP_HU_MMS_UV	NA	NA	NA
HP_IR_MMS_UV	TTHERM_00495950	TCB1	CMD1.TTHERM_00495950
HU_IR_MMS_UV	NA	NA	NA
CPT_HP_IR	TTHERM_00329800	GUK1.TTHERM_00329800	GUK1.TTHERM_00329800
CPT_HP_MMS	TTHERM_00134910	CHS3	CHS1.TTHERM_00134910
CPT_HP_UV	TTHERM_00085440	NA	NA
CPT_HU_IR	TTHERM_00425780	NA	NA
CPT_HU_MMS	TTHERM_00572000	GST55	NA
CPT_HU_UV	TTHERM_00136180	NA	NA
CPT_IR_MMS	TTHERM_00134960	NA	NA
CPT_IR_UV	TTHERM_000780929	NA	NA
CPT_MMS_UV	TTHERM_00043780	POLN1	NA
HP_HU_IR	NA	NA	NA
HP_HU_MMS	TTHERM_00476410	NA	NA
HP_HU_UV	NA	NA	NA
HP_IR_MMS	NA	NA	NA
HP_IR_UV	NA	NA	NA
HP_MMS_UV	TTHERM_00185760	NA	NA
HU_IR_MMS	NA	NA	NA
HU_IR_UV	TTHERM_00245280	NA	NA
HU_MMS_UV	TTHERM_00713380	YOL075C.TTHERM_00713380	YOL075C.TTHERM_00713380
IR_MMS_UV	TTHERM_00419820	OTU2.TTHERM_00419820	OTU2.TTHERM_00419820
CPT_HP	TTHERM_00241790	PMR1.TTHERM_00241790	PMR1.TTHERM_00241790
CPT_HU	TTHERM_00171630	FMN1.TTHERM_00171630	FMN1.TTHERM_00171630
CPT_IR	TTHERM_000683404	NA	NA
CPT_MMS	TTHERM_00030350	NA	NA
CPT_UV	TTHERM_00013120	PAT1	NA
HP_HU	NA	NA	NA
HP_IR	TTHERM_00527180	GRL1	NA
HP_MMS	TTHERM_00046680	RIO1	RIO1.TTHERM_00046680
HP_UV	TTHERM_00107090	IRC24.TTHERM_00107090	IRC24.TTHERM_00107090
HU_IR	TTHERM_00374950	MPC1.TTHERM_00374950	MPC1.TTHERM_00374950
HU_MMS	TTHERM_00133500	CCP1.TTHERM_00133500	CCP1.TTHERM_00133500
HU_UV	TTHERM_00672020	NA	NA
IR_MMS	TTHERM_00683010	PLA1	NA
IR_UV	TTHERM_000522989	NA	NA
MMS_UV	TTHERM_00185560	NA	NA
CPT	TTHERM_00011540	SPS19.TTHERM_00011540	SPS19.TTHERM_00011540
HP	TTHERM_000218829	LYS9.TTHERM_000218829	LYS9.TTHERM_000218829
HU	TTHERM_00059110	NA	NA
IR	TTHERM_000295088	NA	NA
MMS	TTHERM_000142399	NA	NA
UV	TTHERM_000069389	NA	NA
CPT_HP_HU_IR_MMS_UV	TTHERM_00150000	MSH6L3	MSH6.TTHERM_00150000
CPT_HP_HU_IR_MMS	NA	NA	NA
CPT_HP_HU_IR_UV	NA	NA	NA
CPT_HP_HU_MMS_UV	TTHERM_00170170	NA	NA
CPT_HP_IR_MMS_UV	TTHERM_00106890	RFA1	RFA1.TTHERM_00106890
CPT_HU_IR_MMS_UV	TTHERM_00242070	PRP46.TTHERM_00242070	PRP46.TTHERM_00242070
HP_HU_IR_MMS_UV	NA	NA	NA
CPT_HP_HU_IR	NA	NA	NA
CPT_HP_HU_MMS	NA	NA	NA
CPT_HP_HU_UV	TTHERM_00686170	CTP1.TTHERM_00686170	CTP1.TTHERM_00686170
CPT_HP_IR_MMS	TTHERM_00321680	CTH3	PEP4.TTHERM_00321680
CPT_HP_IR_UV	TTHERM_00486690	NA	NA
CPT_HP_MMS_UV	TTHERM_00160680	PPN1.TTHERM_00160680	PPN1.TTHERM_00160680
CPT_HU_IR_MMS	TTHERM_00474780	QNS1.TTHERM_00474780	QNS1.TTHERM_00474780
CPT_HU_IR_UV	TTHERM_00181090	NA	NA
CPT_HU_MMS_UV	TTHERM_01016020	KSS1.TTHERM_01016020	KSS1.TTHERM_01016020
CPT_IR_MMS_UV	TTHERM_00070820	NA	NA
HP_HU_IR_MMS	TTHERM_00572010	GST57	NA
HP_HU_IR_UV	NA	NA	NA
HP_HU_MMS_UV	NA	NA	NA
HP_IR_MMS_UV	TTHERM_00599780	NA	NA
HU_IR_MMS_UV	NA	NA	NA
CPT_HP_IR	TTHERM_00400750	NIT3.TTHERM_00400750	NIT3.TTHERM_00400750
CPT_HP_MMS	TTHERM_00137740	ERG11.TTHERM_00137740	ERG11.TTHERM_00137740
CPT_HP_UV	TTHERM_00113120	NA	NA
CPT_HU_IR	TTHERM_00483600	NA	NA
CPT_HU_MMS	TTHERM_00711950	PCP1.TTHERM_00711950	PCP1.TTHERM_00711950
CPT_HU_UV	TTHERM_00241610	NA	NA
CPT_IR_MMS	TTHERM_00317400	ZEF1	FAP1.TTHERM_00317400
CPT_IR_UV	TTHERM_00086770	YSH1.TTHERM_00086770	YSH1.TTHERM_00086770
CPT_MMS_UV	TTHERM_00050540	NA	NA
HP_HU_IR	NA	NA	NA
HP_HU_MMS	TTHERM_00494500	RRM32	ECM2.TTHERM_00494500
HP_HU_UV	NA	NA	NA
HP_IR_MMS	NA	NA	NA
HP_IR_UV	NA	NA	NA
HP_MMS_UV	TTHERM_00242230	NA	NA
HU_IR_MMS	NA	NA	NA
HU_IR_UV	TTHERM_00418090	NA	NA
HU_MMS_UV	TTHERM_01044650	NA	NA
IR_MMS_UV	TTHERM_00433940	NA	NA
CPT_HP	TTHERM_00247100	NOB1.TTHERM_00247100	NOB1.TTHERM_00247100
CPT_HU	TTHERM_00196300	NA	NA
CPT_IR	TTHERM_000709619	NA	NA
CPT_MMS	TTHERM_00037460	ATG82	ATG8.TTHERM_00037460
CPT_UV	TTHERM_00013580	YJU2.TTHERM_00013580	YJU2.TTHERM_00013580
HP_HU	NA	NA	NA
HP_IR	TTHERM_00825650	DLD2.TTHERM_00825650	DLD2.TTHERM_00825650
HP_MMS	TTHERM_00046770	UTP13	UTP13.TTHERM_00046770
HP_UV	TTHERM_00129890	ERG5.TTHERM_00129890	ERG5.TTHERM_00129890
HU_IR	TTHERM_00388420	NA	NA
HU_MMS	TTHERM_00145060	ETR1.TTHERM_00145060	ETR1.TTHERM_00145060
HU_UV	TTHERM_00691090	NA	NA
IR_MMS	TTHERM_00763020	PGA3.TTHERM_00763020	PGA3.TTHERM_00763020
IR_UV	TTHERM_00130000	NA	NA
MMS_UV	TTHERM_00277570	NA	NA
CPT	TTHERM_00013480	CRM1.TTHERM_00013480	CRM1.TTHERM_00013480
HP	TTHERM_000311946	NA	NA
HU	TTHERM_000786968	AAP1.TTHERM_000786968	AAP1.TTHERM_000786968
IR	TTHERM_000300119	NA	NA
MMS	TTHERM_000145609	NA	NA
UV	TTHERM_00010970	TOM71.TTHERM_00010970	TOM71.TTHERM_00010970
CPT_HP_HU_IR_MMS_UV	TTHERM_00151380	NA	NA
CPT_HP_HU_IR_MMS	NA	NA	NA
CPT_HP_HU_IR_UV	NA	NA	NA
CPT_HP_HU_MMS_UV	TTHERM_00185430	NA	NA
CPT_HP_IR_MMS_UV	TTHERM_001113129	NA	NA
CPT_HU_IR_MMS_UV	TTHERM_00312320	NA	NA
HP_HU_IR_MMS_UV	NA	NA	NA
CPT_HP_HU_IR	NA	NA	NA
CPT_HP_HU_MMS	NA	NA	NA
CPT_HP_HU_UV	NA	NA	NA
CPT_HP_IR_MMS	TTHERM_00445920	CTH4	NA
CPT_HP_IR_UV	TTHERM_00497807	NA	NA
CPT_HP_MMS_UV	TTHERM_00190810	NA	NA
CPT_HU_IR_MMS	TTHERM_00630450	GST59	NA
CPT_HU_IR_UV	TTHERM_00194330	CEN7	CDC31.TTHERM_00194330
CPT_HU_MMS_UV	NA	NA	NA
CPT_IR_MMS_UV	TTHERM_000729209	NA	NA
HP_HU_IR_MMS	TTHERM_00640030	NA	NA
HP_HU_IR_UV	NA	NA	NA
HP_HU_MMS_UV	NA	NA	NA
HP_IR_MMS_UV	TTHERM_00979870	NA	NA
HU_IR_MMS_UV	NA	NA	NA
CPT_HP_IR	NA	NA	NA
CPT_HP_MMS	TTHERM_00185900	NA	NA
CPT_HP_UV	TTHERM_00194030	NA	NA
CPT_HU_IR	TTHERM_00499640	NA	NA
CPT_HU_MMS	TTHERM_01013150	CAJ1.TTHERM_01013150	CAJ1.TTHERM_01013150
CPT_HU_UV	TTHERM_00384970	NA	NA
CPT_IR_MMS	TTHERM_00339850	CYB5.TTHERM_00339850	CYB5.TTHERM_00339850
CPT_IR_UV	TTHERM_00088160	PPH21.TTHERM_00088160	PPH21.TTHERM_00088160
CPT_MMS_UV	TTHERM_00086920	NA	NA
HP_HU_IR	NA	NA	NA
HP_HU_MMS	TTHERM_00581990	NA	NA
HP_HU_UV	NA	NA	NA
HP_IR_MMS	NA	NA	NA
HP_IR_UV	NA	NA	NA
HP_MMS_UV	TTHERM_00554600	CPH3	BRN1.TTHERM_00554600
HU_IR_MMS	NA	NA	NA
HU_IR_UV	TTHERM_00455309	POLK1	REV1.TTHERM_00455309
HU_MMS_UV	NA	NA	NA
IR_MMS_UV	TTHERM_00442200	NA	NA
CPT_HP	TTHERM_00268280	NA	NA
CPT_HU	TTHERM_00196310	NA	NA
CPT_IR	TTHERM_00074260	NA	NA
CPT_MMS	TTHERM_00046740	NA	NA
CPT_UV	TTHERM_00016050	CUT1	NA
HP_HU	NA	NA	NA
HP_IR	TTHERM_01014620	GCN20.TTHERM_01014620	GCN20.TTHERM_01014620
HP_MMS	TTHERM_00049230	LPL1.TTHERM_00049230	LPL1.TTHERM_00049230
HP_UV	TTHERM_00140960	NA	NA
HU_IR	TTHERM_00455130	NA	NA
HU_MMS	TTHERM_00145070	ETR1.TTHERM_00145070	ETR1.TTHERM_00145070
HU_UV	TTHERM_01146060	NA	NA
IR_MMS	TTHERM_00785860	NA	NA
IR_UV	TTHERM_00133570	NA	NA
MMS_UV	TTHERM_00320020	ABC10	BPT1.TTHERM_00320020
CPT	TTHERM_00013750	NA	NA
HP	TTHERM_00036980	DRH6	RRP3.TTHERM_00036980
HU	TTHERM_001026361	NA	NA
IR	TTHERM_00031830	PDR5.TTHERM_00031830	PDR5.TTHERM_00031830
MMS	TTHERM_000145988	NA	NA
UV	TTHERM_00013360	HOS4.TTHERM_00013360	HOS4.TTHERM_00013360
CPT_HP_HU_IR_MMS_UV	TTHERM_00161090	NPT1.TTHERM_00161090	NPT1.TTHERM_00161090
CPT_HP_HU_IR_MMS	NA	NA	NA
CPT_HP_HU_IR_UV	NA	NA	NA
CPT_HP_HU_MMS_UV	TTHERM_00221110	PUF3	PUF3.TTHERM_00221110
CPT_HP_IR_MMS_UV	TTHERM_00134770	FMP41.TTHERM_00134770	FMP41.TTHERM_00134770
CPT_HU_IR_MMS_UV	TTHERM_00348890	NA	NA
HP_HU_IR_MMS_UV	NA	NA	NA
CPT_HP_HU_IR	NA	NA	NA
CPT_HP_HU_MMS	NA	NA	NA
CPT_HP_HU_UV	NA	NA	NA
CPT_HP_IR_MMS	TTHERM_00691410	SEC3.TTHERM_00691410	SEC3.TTHERM_00691410
CPT_HP_IR_UV	TTHERM_00688690	NA	NA
CPT_HP_MMS_UV	TTHERM_00283840	END5	NA
CPT_HU_IR_MMS	TTHERM_00637410	COX11.TTHERM_00637410	COX11.TTHERM_00637410
CPT_HU_IR_UV	TTHERM_00256980	NA	NA
CPT_HU_MMS_UV	NA	NA	NA
CPT_IR_MMS_UV	TTHERM_00077090	PCP4	FKS3.TTHERM_00077090
HP_HU_IR_MMS	TTHERM_00670640	AAP4	NTO1.TTHERM_00670640
HP_HU_IR_UV	NA	NA	NA
HP_HU_MMS_UV	NA	NA	NA
HP_IR_MMS_UV	TTHERM_01014550	MCF10	PET8.TTHERM_01014550
HU_IR_MMS_UV	NA	NA	NA
CPT_HP_IR	NA	NA	NA
CPT_HP_MMS	TTHERM_00190960	NA	NA
CPT_HP_UV	TTHERM_00263010	FRK1.TTHERM_00263010	FRK1.TTHERM_00263010
CPT_HU_IR	TTHERM_00649220	NA	NA
CPT_HU_MMS	TTHERM_01222600	GLR1.TTHERM_01222600	GLR1.TTHERM_01222600
CPT_HU_UV	TTHERM_00442570	NA	NA
CPT_IR_MMS	TTHERM_00420970	NA	NA
CPT_IR_UV	TTHERM_00101320	NA	NA
CPT_MMS_UV	TTHERM_00145750	PRP46.TTHERM_00145750	PRP46.TTHERM_00145750
HP_HU_IR	NA	NA	NA
HP_HU_MMS	NA	NA	NA
HP_HU_UV	NA	NA	NA
HP_IR_MMS	NA	NA	NA
HP_IR_UV	NA	NA	NA
HP_MMS_UV	TTHERM_00560110	NA	NA
HU_IR_MMS	NA	NA	NA
HU_IR_UV	TTHERM_00518500	NA	NA
HU_MMS_UV	NA	NA	NA
IR_MMS_UV	TTHERM_00532790	YOL075C.TTHERM_00532790	YOL075C.TTHERM_00532790
CPT_HP	TTHERM_00312730	POM121	NA
CPT_HU	TTHERM_00237500	MDH2	NA
CPT_IR	TTHERM_00088090	NA	NA
CPT_MMS	TTHERM_00048990	YEF1.TTHERM_00048990	YEF1.TTHERM_00048990
CPT_UV	TTHERM_000160559	XPF1	RAD1.TTHERM_000160559
HP_HU	NA	NA	NA
HP_IR	TTHERM_01078050	NA	NA
HP_MMS	TTHERM_00059210	CDS1.TTHERM_00059210	CDS1.TTHERM_00059210
HP_UV	TTHERM_00149350	NA	NA
HU_IR	TTHERM_00455350	NA	NA
HU_MMS	TTHERM_00151890	YBL036C.TTHERM_00151890	YBL036C.TTHERM_00151890
HU_UV	NA	NA	NA
IR_MMS	TTHERM_01014670	HEM1.TTHERM_01014670	HEM1.TTHERM_01014670
IR_UV	TTHERM_00137720	NA	NA
MMS_UV	TTHERM_00348140	NA	NA
CPT	TTHERM_000137809	NA	NA
HP	TTHERM_00038880	CCF9	NA
HU	TTHERM_00136069	NA	NA
IR	TTHERM_000331066	NA	NA
MMS	TTHERM_000161759	TIS11.TTHERM_000161759	TIS11.TTHERM_000161759
UV	TTHERM_000187168	NA	NA
CPT_HP_HU_IR_MMS_UV	TTHERM_00290980	HUL5.TTHERM_00290980	HUL5.TTHERM_00290980
CPT_HP_HU_IR_MMS	NA	NA	NA
CPT_HP_HU_IR_UV	NA	NA	NA
CPT_HP_HU_MMS_UV	TTHERM_00343560	NA	NA
CPT_HP_IR_MMS_UV	TTHERM_00191280	CTH48	NA
CPT_HU_IR_MMS_UV	TTHERM_00352210	TRZ1.TTHERM_00352210	TRZ1.TTHERM_00352210
HP_HU_IR_MMS_UV	NA	NA	NA
CPT_HP_HU_IR	NA	NA	NA
CPT_HP_HU_MMS	NA	NA	NA
CPT_HP_HU_UV	NA	NA	NA
CPT_HP_IR_MMS	TTHERM_00716250	LC10	DYN2.TTHERM_00716250
CPT_HP_IR_UV	TTHERM_00777280	NA	NA
CPT_HP_MMS_UV	TTHERM_00374870	NCE103.TTHERM_00374870	NCE103.TTHERM_00374870
CPT_HU_IR_MMS	TTHERM_00822020	NA	NA
CPT_HU_IR_UV	TTHERM_00277150	NA	NA
CPT_HU_MMS_UV	NA	NA	NA
CPT_IR_MMS_UV	TTHERM_000809379	NA	NA
HP_HU_IR_MMS	TTHERM_00890140	NA	NA
HP_HU_IR_UV	NA	NA	NA
HP_HU_MMS_UV	NA	NA	NA
HP_IR_MMS_UV	NA	NA	NA
HU_IR_MMS_UV	NA	NA	NA
CPT_HP_IR	NA	NA	NA
CPT_HP_MMS	TTHERM_00219180	DRH41	HCA4.TTHERM_00219180
CPT_HP_UV	TTHERM_00305480	NA	NA
CPT_HU_IR	TTHERM_00661650	GST34	NA
CPT_HU_MMS	NA	NA	NA
CPT_HU_UV	TTHERM_00471070	RAB11D	YPT31.TTHERM_00471070
CPT_IR_MMS	TTHERM_00463030	AZF1.TTHERM_00463030	AZF1.TTHERM_00463030
CPT_IR_UV	TTHERM_00106700	RAD53.TTHERM_00106700	RAD53.TTHERM_00106700
CPT_MMS_UV	TTHERM_00161180	RFC5	RFC5.TTHERM_00161180
HP_HU_IR	NA	NA	NA
HP_HU_MMS	NA	NA	NA
HP_HU_UV	NA	NA	NA
HP_IR_MMS	NA	NA	NA
HP_IR_UV	NA	NA	NA
HP_MMS_UV	TTHERM_00594300	NA	NA
HU_IR_MMS	NA	NA	NA
HU_IR_UV	TTHERM_00633350	NA	NA
HU_MMS_UV	NA	NA	NA
IR_MMS_UV	TTHERM_00582300	NA	NA
CPT_HP	TTHERM_00321600	NA	NA
CPT_HU	TTHERM_00285550	NA	NA
CPT_IR	TTHERM_00092840	UBA22	UBA2.TTHERM_00092840
CPT_MMS	TTHERM_00052420	ASN2.TTHERM_00052420	ASN2.TTHERM_00052420
CPT_UV	TTHERM_00016590	CTH89	NA
HP_HU	NA	NA	NA
HP_IR	NA	NA	NA
HP_MMS	TTHERM_00059250	NA	NA
HP_UV	TTHERM_00157800	HEM14.TTHERM_00157800	HEM14.TTHERM_00157800
HU_IR	TTHERM_00463290	POX1.TTHERM_00463290	POX1.TTHERM_00463290
HU_MMS	TTHERM_00160800	OYE3.TTHERM_00160800	OYE3.TTHERM_00160800
HU_UV	NA	NA	NA
IR_MMS	TTHERM_01197030	NA	NA
IR_UV	TTHERM_00145790	NA	NA
MMS_UV	TTHERM_00361720	RCL1	RCL1.TTHERM_00361720
CPT	TTHERM_000161459	NA	NA
HP	TTHERM_00043920	NA	NA
HU	TTHERM_00160810	OYE3.TTHERM_00160810	OYE3.TTHERM_00160810
IR	TTHERM_000471019	NA	NA
MMS	TTHERM_00037020	NA	NA
UV	TTHERM_00024320	NA	NA
CPT_HP_HU_IR_MMS_UV	TTHERM_00310640	DES7	NA
CPT_HP_HU_IR_MMS	NA	NA	NA
CPT_HP_HU_IR_UV	NA	NA	NA
CPT_HP_HU_MMS_UV	TTHERM_00616330	YVH1.TTHERM_00616330	YVH1.TTHERM_00616330
CPT_HP_IR_MMS_UV	TTHERM_00214740	EHD3.TTHERM_00214740	EHD3.TTHERM_00214740
CPT_HU_IR_MMS_UV	TTHERM_00390120	NA	NA
HP_HU_IR_MMS_UV	NA	NA	NA
CPT_HP_HU_IR	NA	NA	NA
CPT_HP_HU_MMS	NA	NA	NA
CPT_HP_HU_UV	NA	NA	NA
CPT_HP_IR_MMS	TTHERM_01052980	YCR087C.TTHERM_01052980	YCR087C.TTHERM_01052980
CPT_HP_IR_UV	TTHERM_00819580	PRP46.TTHERM_00819580	PRP46.TTHERM_00819580
CPT_HP_MMS_UV	TTHERM_00388160	YLR126C.TTHERM_00388160	YLR126C.TTHERM_00388160
CPT_HU_IR_MMS	TTHERM_00842700	TOM1.TTHERM_00842700	TOM1.TTHERM_00842700
CPT_HU_IR_UV	TTHERM_00290730	NA	NA
CPT_HU_MMS_UV	NA	NA	NA
CPT_IR_MMS_UV	TTHERM_00092870	NA	NA
HP_HU_IR_MMS	TTHERM_01227740	NA	NA
HP_HU_IR_UV	NA	NA	NA
HP_HU_MMS_UV	NA	NA	NA
HP_IR_MMS_UV	NA	NA	NA
HU_IR_MMS_UV	NA	NA	NA
CPT_HP_IR	NA	NA	NA
CPT_HP_MMS	TTHERM_00279710	NA	NA
CPT_HP_UV	TTHERM_00317160	EKI1.TTHERM_00317160	EKI1.TTHERM_00317160
CPT_HU_IR	TTHERM_00849280	NA	NA
CPT_HU_MMS	NA	NA	NA
CPT_HU_UV	TTHERM_00494660	MIS1.TTHERM_00494660	MIS1.TTHERM_00494660
CPT_IR_MMS	TTHERM_00481290	UBA13	UBA1.TTHERM_00481290
CPT_IR_UV	TTHERM_00121000	DAN4.TTHERM_00121000	DAN4.TTHERM_00121000
CPT_MMS_UV	TTHERM_00191680	HSL1.TTHERM_00191680	HSL1.TTHERM_00191680
HP_HU_IR	NA	NA	NA
HP_HU_MMS	NA	NA	NA
HP_HU_UV	NA	NA	NA
HP_IR_MMS	NA	NA	NA
HP_IR_UV	NA	NA	NA
HP_MMS_UV	TTHERM_00644640	NA	NA
HU_IR_MMS	NA	NA	NA
HU_IR_UV	TTHERM_00721640	DIC1.TTHERM_00721640	DIC1.TTHERM_00721640
HU_MMS_UV	NA	NA	NA
IR_MMS_UV	TTHERM_00787370	TRS20.TTHERM_00787370	TRS20.TTHERM_00787370
CPT_HP	TTHERM_00321640	NA	NA
CPT_HU	TTHERM_00316680	DRH28	SPB4.TTHERM_00316680
CPT_IR	TTHERM_00122260	NA	NA
CPT_MMS	TTHERM_00053800	DLD1.TTHERM_00053800	DLD1.TTHERM_00053800
CPT_UV	TTHERM_00019670	NA	NA
HP_HU	NA	NA	NA
HP_IR	NA	NA	NA
HP_MMS	TTHERM_000593080	IMP3.TTHERM_000593080	IMP3.TTHERM_000593080
HP_UV	TTHERM_00295670	CRG1.TTHERM_00295670	CRG1.TTHERM_00295670
HU_IR	TTHERM_00502439	CYC8.TTHERM_00502439	CYC8.TTHERM_00502439
HU_MMS	TTHERM_00249710	YBR139W.TTHERM_00249710	YBR139W.TTHERM_00249710
HU_UV	NA	NA	NA
IR_MMS	TTHERM_01250100	GLT1.TTHERM_01250100	GLT1.TTHERM_01250100
IR_UV	TTHERM_00161840	YAH1.TTHERM_00161840	YAH1.TTHERM_00161840
MMS_UV	TTHERM_00394500	ERG24.TTHERM_00394500	ERG24.TTHERM_00394500
CPT	TTHERM_00016170	HHT3	HHT2.TTHERM_00016170
HP	TTHERM_00047160	NSI1.TTHERM_00047160	NSI1.TTHERM_00047160
HU	TTHERM_00170260	SAP3	NA
IR	TTHERM_00047370	ALD4.TTHERM_00047370	ALD4.TTHERM_00047370
MMS	TTHERM_00043860	PSE1.TTHERM_00043860	PSE1.TTHERM_00043860
UV	TTHERM_000284109	NA	NA
CPT_HP_HU_IR_MMS_UV	TTHERM_00310900	NA	NA
CPT_HP_HU_IR_MMS	NA	NA	NA
CPT_HP_HU_IR_UV	NA	NA	NA
CPT_HP_HU_MMS_UV	TTHERM_00655520	SOD1.TTHERM_00655520	SOD1.TTHERM_00655520
CPT_HP_IR_MMS_UV	TTHERM_00285570	HXT11.TTHERM_00285570	HXT11.TTHERM_00285570
CPT_HU_IR_MMS_UV	TTHERM_00390130	NA	NA
HP_HU_IR_MMS_UV	NA	NA	NA
CPT_HP_HU_IR	NA	NA	NA
CPT_HP_HU_MMS	NA	NA	NA
CPT_HP_HU_UV	NA	NA	NA
CPT_HP_IR_MMS	TTHERM_01084110	GLN1.TTHERM_01084110	GLN1.TTHERM_01084110
CPT_HP_IR_UV	NA	NA	NA
CPT_HP_MMS_UV	TTHERM_00424700	POL1	POL1.TTHERM_00424700
CPT_HU_IR_MMS	NA	NA	NA
CPT_HU_IR_UV	TTHERM_00338210	RPL18	NA
CPT_HU_MMS_UV	NA	NA	NA
CPT_IR_MMS_UV	TTHERM_00093940	NA	NA
HP_HU_IR_MMS	NA	NA	NA
HP_HU_IR_UV	NA	NA	NA
HP_HU_MMS_UV	NA	NA	NA
HP_IR_MMS_UV	NA	NA	NA
HU_IR_MMS_UV	NA	NA	NA
CPT_HP_IR	NA	NA	NA
CPT_HP_MMS	TTHERM_00301900	KIP3.TTHERM_00301900	KIP3.TTHERM_00301900
CPT_HP_UV	TTHERM_00318700	CDK10	CDC28.TTHERM_00318700
CPT_HU_IR	TTHERM_00927250	YMR226C.TTHERM_00927250	YMR226C.TTHERM_00927250
CPT_HU_MMS	NA	NA	NA
CPT_HU_UV	TTHERM_00622680	PSR2.TTHERM_00622680	PSR2.TTHERM_00622680
CPT_IR_MMS	TTHERM_00486940	NA	NA
CPT_IR_UV	TTHERM_00122050	ALO1.TTHERM_00122050	ALO1.TTHERM_00122050
CPT_MMS_UV	TTHERM_00194400	NA	NA
HP_HU_IR	NA	NA	NA
HP_HU_MMS	NA	NA	NA
HP_HU_UV	NA	NA	NA
HP_IR_MMS	NA	NA	NA
HP_IR_UV	NA	NA	NA
HP_MMS_UV	TTHERM_00656070	NA	NA
HU_IR_MMS	NA	NA	NA
HU_IR_UV	TTHERM_00782100	NA	NA
HU_MMS_UV	NA	NA	NA
IR_MMS_UV	TTHERM_00809300	NA	NA
CPT_HP	TTHERM_00392680	TAF5.TTHERM_00392680	TAF5.TTHERM_00392680
CPT_HU	TTHERM_00328679	NA	NA
CPT_IR	TTHERM_001237410	NA	NA
CPT_MMS	TTHERM_00069440	SKY1.TTHERM_00069440	SKY1.TTHERM_00069440
CPT_UV	TTHERM_00030590	NA	NA
HP_HU	NA	NA	NA
HP_IR	NA	NA	NA
HP_MMS	TTHERM_00077110	EMW1.TTHERM_00077110	EMW1.TTHERM_00077110
HP_UV	TTHERM_00312020	NA	NA
HU_IR	TTHERM_00535990	NA	NA
HU_MMS	TTHERM_00444690	NA	NA
HU_UV	NA	NA	NA
IR_MMS	NA	NA	NA
IR_UV	TTHERM_00188950	NA	NA
MMS_UV	TTHERM_00411750	NA	NA
CPT	TTHERM_00016280	YML131W.TTHERM_00016280	YML131W.TTHERM_00016280
HP	TTHERM_00049120	ESF1.TTHERM_00049120	ESF1.TTHERM_00049120
HU	TTHERM_00196430	NA	NA
IR	TTHERM_00047450	NA	NA
MMS	TTHERM_000444489	CYC8.TTHERM_000444489	CYC8.TTHERM_000444489
UV	TTHERM_000295039	CDC48.TTHERM_000295039	CDC48.TTHERM_000295039
CPT_HP_HU_IR_MMS_UV	TTHERM_00352190	LIH1.TTHERM_00352190	LIH1.TTHERM_00352190
CPT_HP_HU_IR_MMS	NA	NA	NA
CPT_HP_HU_IR_UV	NA	NA	NA
CPT_HP_HU_MMS_UV	TTHERM_00819550	DYS1.TTHERM_00819550	DYS1.TTHERM_00819550
CPT_HP_IR_MMS_UV	TTHERM_00295920	MSH2	MSH2.TTHERM_00295920
CPT_HU_IR_MMS_UV	TTHERM_00526990	THD14	HST2.TTHERM_00526990
HP_HU_IR_MMS_UV	NA	NA	NA
CPT_HP_HU_IR	NA	NA	NA
CPT_HP_HU_MMS	NA	NA	NA
CPT_HP_HU_UV	NA	NA	NA
CPT_HP_IR_MMS	NA	NA	NA
CPT_HP_IR_UV	NA	NA	NA
CPT_HP_MMS_UV	TTHERM_00486970	NA	NA
CPT_HU_IR_MMS	NA	NA	NA
CPT_HU_IR_UV	TTHERM_00392850	NA	NA
CPT_HU_MMS_UV	NA	NA	NA
CPT_IR_MMS_UV	TTHERM_00112700	NA	NA
HP_HU_IR_MMS	NA	NA	NA
HP_HU_IR_UV	NA	NA	NA
HP_HU_MMS_UV	NA	NA	NA
HP_IR_MMS_UV	NA	NA	NA
HU_IR_MMS_UV	NA	NA	NA
CPT_HP_IR	NA	NA	NA
CPT_HP_MMS	TTHERM_00312160	NA	NA
CPT_HP_UV	TTHERM_00334520	RAB5B	VPS21.TTHERM_00334520
CPT_HU_IR	NA	NA	NA
CPT_HU_MMS	NA	NA	NA
CPT_HU_UV	TTHERM_00770820	ATG20.TTHERM_00770820	ATG20.TTHERM_00770820
CPT_IR_MMS	TTHERM_00535700	SSM4.TTHERM_00535700	SSM4.TTHERM_00535700
CPT_IR_UV	TTHERM_00122280	NA	NA
CPT_MMS_UV	TTHERM_00213600	RFC3	RFC3.TTHERM_00213600
HP_HU_IR	NA	NA	NA
HP_HU_MMS	NA	NA	NA
HP_HU_UV	NA	NA	NA
HP_IR_MMS	NA	NA	NA
HP_IR_UV	NA	NA	NA
HP_MMS_UV	TTHERM_00727500	NCS2.TTHERM_00727500	NCS2.TTHERM_00727500
HU_IR_MMS	NA	NA	NA
HU_IR_UV	TTHERM_00794490	CHN1	NA
HU_MMS_UV	NA	NA	NA
IR_MMS_UV	TTHERM_00809310	NA	NA
CPT_HP	TTHERM_00418660	UTP6.TTHERM_00418660	UTP6.TTHERM_00418660
CPT_HU	TTHERM_00365450	PMR1.TTHERM_00365450	PMR1.TTHERM_00365450
CPT_IR	TTHERM_00145680	TOM71.TTHERM_00145680	TOM71.TTHERM_00145680
CPT_MMS	TTHERM_00079200	FOX2.TTHERM_00079200	FOX2.TTHERM_00079200
CPT_UV	TTHERM_000348809	NA	NA
HP_HU	NA	NA	NA
HP_IR	NA	NA	NA
HP_MMS	TTHERM_00083680	RRP1.TTHERM_00083680	RRP1.TTHERM_00083680
HP_UV	TTHERM_00313530	NA	NA
HU_IR	TTHERM_00585320	DNK1	NA
HU_MMS	TTHERM_00460610	NA	NA
HU_UV	NA	NA	NA
IR_MMS	NA	NA	NA
IR_UV	TTHERM_00268190	PMR1.TTHERM_00268190	PMR1.TTHERM_00268190
MMS_UV	TTHERM_00433450	NA	NA
CPT	TTHERM_000188369	SEC14.TTHERM_000188369	SEC14.TTHERM_000188369
HP	TTHERM_00052430	YER007C.TTHERM_00052430	YER007C.TTHERM_00052430
HU	TTHERM_00274520	GRE3.TTHERM_00274520	GRE3.TTHERM_00274520
IR	TTHERM_000476849	NA	NA
MMS	TTHERM_000446029	BrEt-3	GCN5.TTHERM_000446029
UV	TTHERM_00029960	NA	NA
CPT_HP_HU_IR_MMS_UV	TTHERM_00411810	CDK1	CDC28.TTHERM_00411810
CPT_HP_HU_IR_MMS	NA	NA	NA
CPT_HP_HU_IR_UV	NA	NA	NA
CPT_HP_HU_MMS_UV	TTHERM_01433580	CHN4	NA
CPT_HP_IR_MMS_UV	TTHERM_00348080	NA	NA
CPT_HU_IR_MMS_UV	TTHERM_00717640	YOL075C.TTHERM_00717640	YOL075C.TTHERM_00717640
HP_HU_IR_MMS_UV	NA	NA	NA
CPT_HP_HU_IR	NA	NA	NA
CPT_HP_HU_MMS	NA	NA	NA
CPT_HP_HU_UV	NA	NA	NA
CPT_HP_IR_MMS	NA	NA	NA
CPT_HP_IR_UV	NA	NA	NA
CPT_HP_MMS_UV	TTHERM_00498180	DCD1	DCD1.TTHERM_00498180
CPT_HU_IR_MMS	NA	NA	NA
CPT_HU_IR_UV	TTHERM_00420420	DRH2	PRP5.TTHERM_00420420
CPT_HU_MMS_UV	NA	NA	NA
CPT_IR_MMS_UV	TTHERM_00138530	NA	NA
HP_HU_IR_MMS	NA	NA	NA
HP_HU_IR_UV	NA	NA	NA
HP_HU_MMS_UV	NA	NA	NA
HP_IR_MMS_UV	NA	NA	NA
HU_IR_MMS_UV	NA	NA	NA
CPT_HP_IR	NA	NA	NA
CPT_HP_MMS	TTHERM_00336030	NA	NA
CPT_HP_UV	TTHERM_00550920	NA	NA
CPT_HU_IR	NA	NA	NA
CPT_HU_MMS	NA	NA	NA
CPT_HU_UV	TTHERM_00812750	NA	NA
CPT_IR_MMS	TTHERM_00684770	NA	NA
CPT_IR_UV	TTHERM_00137980	NA	NA
CPT_MMS_UV	TTHERM_00243780	NA	NA
HP_HU_IR	NA	NA	NA
HP_HU_MMS	NA	NA	NA
HP_HU_UV	NA	NA	NA
HP_IR_MMS	NA	NA	NA
HP_IR_UV	NA	NA	NA
HP_MMS_UV	TTHERM_01181990	NA	NA
HU_IR_MMS	NA	NA	NA
HU_IR_UV	TTHERM_00852990	FMP40.TTHERM_00852990	FMP40.TTHERM_00852990
HU_MMS_UV	NA	NA	NA
IR_MMS_UV	TTHERM_01054320	PPN1.TTHERM_01054320	PPN1.TTHERM_01054320
CPT_HP	TTHERM_00421090	NA	NA
CPT_HU	TTHERM_00446320	NA	NA
CPT_IR	TTHERM_00145940	NA	NA
CPT_MMS	TTHERM_00085290	YMR226C.TTHERM_00085290	YMR226C.TTHERM_00085290
CPT_UV	TTHERM_000405549	NA	NA
HP_HU	NA	NA	NA
HP_IR	NA	NA	NA
HP_MMS	TTHERM_00086890	NA	NA
HP_UV	TTHERM_00370900	IRS1	ISM1.TTHERM_00370900
HU_IR	TTHERM_00600090	NA	NA
HU_MMS	TTHERM_00518469	GST28	NA
HU_UV	NA	NA	NA
IR_MMS	NA	NA	NA
IR_UV	TTHERM_00299910	NA	NA
MMS_UV	TTHERM_00641210	IXR1	IXR1.TTHERM_00641210
CPT	TTHERM_00019700	USO1.TTHERM_00019700	USO1.TTHERM_00019700
HP	TTHERM_00059370	NA	NA
HU	TTHERM_00293330	NA	NA
IR	TTHERM_000497689	NA	NA
MMS	TTHERM_00046820	NA	NA
UV	TTHERM_00030370	NA	NA
CPT_HP_HU_IR_MMS_UV	TTHERM_00467690	JMJ3	RPH1.TTHERM_00467690
CPT_HP_HU_IR_MMS	NA	NA	NA
CPT_HP_HU_IR_UV	NA	NA	NA
CPT_HP_HU_MMS_UV	NA	NA	NA
CPT_HP_IR_MMS_UV	TTHERM_00382150	SQS1	ERG9.TTHERM_00382150
CPT_HU_IR_MMS_UV	TTHERM_00723550	DUS1.TTHERM_00723550	DUS1.TTHERM_00723550
HP_HU_IR_MMS_UV	NA	NA	NA
CPT_HP_HU_IR	NA	NA	NA
CPT_HP_HU_MMS	NA	NA	NA
CPT_HP_HU_UV	NA	NA	NA
CPT_HP_IR_MMS	NA	NA	NA
CPT_HP_IR_UV	NA	NA	NA
CPT_HP_MMS_UV	TTHERM_00538480	PPI4	CPR2.TTHERM_00538480
CPT_HU_IR_MMS	NA	NA	NA
CPT_HU_IR_UV	TTHERM_00425840	NA	NA
CPT_HU_MMS_UV	NA	NA	NA
CPT_IR_MMS_UV	TTHERM_00147470	NTP4	FUN26.TTHERM_00147470
HP_HU_IR_MMS	NA	NA	NA
HP_HU_IR_UV	NA	NA	NA
HP_HU_MMS_UV	NA	NA	NA
HP_IR_MMS_UV	NA	NA	NA
HU_IR_MMS_UV	NA	NA	NA
CPT_HP_IR	NA	NA	NA
CPT_HP_MMS	TTHERM_00338330	NA	NA
CPT_HP_UV	TTHERM_00694350	IGR3	NA
CPT_HU_IR	NA	NA	NA
CPT_HU_MMS	NA	NA	NA
CPT_HU_UV	TTHERM_01005150	AMT6	NA
CPT_IR_MMS	TTHERM_00782120	NA	NA
CPT_IR_UV	TTHERM_00141110	NA	NA
CPT_MMS_UV	TTHERM_00245150	RFC2	RFC2.TTHERM_00245150
HP_HU_IR	NA	NA	NA
HP_HU_MMS	NA	NA	NA
HP_HU_UV	NA	NA	NA
HP_IR_MMS	NA	NA	NA
HP_IR_UV	NA	NA	NA
HP_MMS_UV	NA	NA	NA
HU_IR_MMS	NA	NA	NA
HU_IR_UV	TTHERM_01054390	NA	NA
HU_MMS_UV	NA	NA	NA
IR_MMS_UV	NA	NA	NA
CPT_HP	TTHERM_00439360	NA	NA
CPT_HU	TTHERM_00475020	NA	NA
CPT_IR	TTHERM_00160560	NA	NA
CPT_MMS	TTHERM_001014659	RPT2.TTHERM_001014659	RPT2.TTHERM_001014659
CPT_UV	TTHERM_00044960	NA	NA
HP_HU	NA	NA	NA
HP_IR	NA	NA	NA
HP_MMS	TTHERM_000940350	NA	NA
HP_UV	TTHERM_00409098	NA	NA
HU_IR	TTHERM_00678400	NA	NA
HU_MMS	TTHERM_00550890	MDL2.TTHERM_00550890	MDL2.TTHERM_00550890
HU_UV	NA	NA	NA
IR_MMS	NA	NA	NA
IR_UV	TTHERM_00300290	NA	NA
MMS_UV	TTHERM_00656000	NA	NA
CPT	TTHERM_000220819	NA	NA
HP	TTHERM_00070730	MDN1.TTHERM_00070730	MDN1.TTHERM_00070730
HU	TTHERM_00329830	NA	NA
IR	TTHERM_00052360	BAS1.TTHERM_00052360	BAS1.TTHERM_00052360
MMS	TTHERM_000470563	CNB1.TTHERM_000470563	CNB1.TTHERM_000470563
UV	TTHERM_000325651	GRX5.TTHERM_000325651	GRX5.TTHERM_000325651
CPT_HP_HU_IR_MMS_UV	TTHERM_00486800	NA	NA
CPT_HP_HU_IR_MMS	NA	NA	NA
CPT_HP_HU_IR_UV	NA	NA	NA
CPT_HP_HU_MMS_UV	NA	NA	NA
CPT_HP_IR_MMS_UV	TTHERM_00389860	NA	NA
CPT_HU_IR_MMS_UV	TTHERM_00773550	NA	NA
HP_HU_IR_MMS_UV	NA	NA	NA
CPT_HP_HU_IR	NA	NA	NA
CPT_HP_HU_MMS	NA	NA	NA
CPT_HP_HU_UV	NA	NA	NA
CPT_HP_IR_MMS	NA	NA	NA
CPT_HP_IR_UV	NA	NA	NA
CPT_HP_MMS_UV	TTHERM_00575470	YPK9.TTHERM_00575470	YPK9.TTHERM_00575470
CPT_HU_IR_MMS	NA	NA	NA
CPT_HU_IR_UV	TTHERM_00459450	FAND1	NA
CPT_HU_MMS_UV	NA	NA	NA
CPT_IR_MMS_UV	TTHERM_00152050	TFB2	SSL1.TTHERM_00152050
HP_HU_IR_MMS	NA	NA	NA
HP_HU_IR_UV	NA	NA	NA
HP_HU_MMS_UV	NA	NA	NA
HP_IR_MMS_UV	NA	NA	NA
HU_IR_MMS_UV	NA	NA	NA
CPT_HP_IR	NA	NA	NA
CPT_HP_MMS	TTHERM_00392790	NA	NA
CPT_HP_UV	TTHERM_00865130	NA	NA
CPT_HU_IR	NA	NA	NA
CPT_HU_MMS	NA	NA	NA
CPT_HU_UV	TTHERM_01016030	MAC1	NA
CPT_IR_MMS	TTHERM_00824070	NA	NA
CPT_IR_UV	TTHERM_00220690	ROT2.TTHERM_00220690	ROT2.TTHERM_00220690
CPT_MMS_UV	TTHERM_00298220	RAD5L4	RAD5.TTHERM_00298220
HP_HU_IR	NA	NA	NA
HP_HU_MMS	NA	NA	NA
HP_HU_UV	NA	NA	NA
HP_IR_MMS	NA	NA	NA
HP_IR_UV	NA	NA	NA
HP_MMS_UV	NA	NA	NA
HU_IR_MMS	NA	NA	NA
HU_IR_UV	TTHERM_01142800	NA	NA
HU_MMS_UV	NA	NA	NA
IR_MMS_UV	NA	NA	NA
CPT_HP	TTHERM_00455430	SCH9.TTHERM_00455430	SCH9.TTHERM_00455430
CPT_HU	TTHERM_00494630	NA	NA
CPT_IR	TTHERM_00161130	CTH90	NA
CPT_MMS	TTHERM_00106960	SCL1	SCL1.TTHERM_00106960
CPT_UV	TTHERM_00046360	NA	NA
HP_HU	NA	NA	NA
HP_IR	NA	NA	NA
HP_MMS	TTHERM_000992819	CDC4.TTHERM_000992819	CDC4.TTHERM_000992819
HP_UV	TTHERM_00456710	TRM7.TTHERM_00456710	TRM7.TTHERM_00456710
HU_IR	TTHERM_00691670	NA	NA
HU_MMS	TTHERM_00569210	GST21	NA
HU_UV	NA	NA	NA
IR_MMS	NA	NA	NA
IR_UV	TTHERM_00312180	NA	NA
MMS_UV	TTHERM_00680670	NA	NA
CPT	TTHERM_00023990	RRM63	HSH49.TTHERM_00023990
HP	TTHERM_00075630	NA	NA
HU	TTHERM_00344360	NA	NA
IR	TTHERM_00069330	DOP1.TTHERM_00069330	DOP1.TTHERM_00069330
MMS	TTHERM_00047340	NA	NA
UV	TTHERM_00032870	YOL075C.TTHERM_00032870	YOL075C.TTHERM_00032870
CPT_HP_HU_IR_MMS_UV	TTHERM_00490690	NA	NA
CPT_HP_HU_IR_MMS	NA	NA	NA
CPT_HP_HU_IR_UV	NA	NA	NA
CPT_HP_HU_MMS_UV	NA	NA	NA
CPT_HP_IR_MMS_UV	TTHERM_00418110	NA	NA
CPT_HU_IR_MMS_UV	TTHERM_00823940	PGA3.TTHERM_00823940	PGA3.TTHERM_00823940
HP_HU_IR_MMS_UV	NA	NA	NA
CPT_HP_HU_IR	NA	NA	NA
CPT_HP_HU_MMS	NA	NA	NA
CPT_HP_HU_UV	NA	NA	NA
CPT_HP_IR_MMS	NA	NA	NA
CPT_HP_IR_UV	NA	NA	NA
CPT_HP_MMS_UV	TTHERM_00600120	YPK9.TTHERM_00600120	YPK9.TTHERM_00600120
CPT_HU_IR_MMS	NA	NA	NA
CPT_HU_IR_UV	TTHERM_00470620	PNC1.TTHERM_00470620	PNC1.TTHERM_00470620
CPT_HU_MMS_UV	NA	NA	NA
CPT_IR_MMS_UV	TTHERM_00170520	NA	NA
HP_HU_IR_MMS	NA	NA	NA
HP_HU_IR_UV	NA	NA	NA
HP_HU_MMS_UV	NA	NA	NA
HP_IR_MMS_UV	NA	NA	NA
HU_IR_MMS_UV	NA	NA	NA
CPT_HP_IR	NA	NA	NA
CPT_HP_MMS	TTHERM_00420640	PDR16.TTHERM_00420640	PDR16.TTHERM_00420640
CPT_HP_UV	NA	NA	NA
CPT_HU_IR	NA	NA	NA
CPT_HU_MMS	NA	NA	NA
CPT_HU_UV	TTHERM_01079130	NA	NA
CPT_IR_MMS	TTHERM_01080610	NA	NA
CPT_IR_UV	TTHERM_00222280	POP1	POP1.TTHERM_00222280
CPT_MMS_UV	TTHERM_00300520	GDI1.TTHERM_00300520	GDI1.TTHERM_00300520
HP_HU_IR	NA	NA	NA
HP_HU_MMS	NA	NA	NA
HP_HU_UV	NA	NA	NA
HP_IR_MMS	NA	NA	NA
HP_IR_UV	NA	NA	NA
HP_MMS_UV	NA	NA	NA
HU_IR_MMS	NA	NA	NA
HU_IR_UV	NA	NA	NA
HU_MMS_UV	NA	NA	NA
IR_MMS_UV	NA	NA	NA
CPT_HP	TTHERM_00474900	PUF6.TTHERM_00474900	PUF6.TTHERM_00474900
CPT_HU	TTHERM_00523030	CAB5.TTHERM_00523030	CAB5.TTHERM_00523030
CPT_IR	TTHERM_00189330	ICT1.TTHERM_00189330	ICT1.TTHERM_00189330
CPT_MMS	TTHERM_00112440	EBP2	BIM1.TTHERM_00112440
CPT_UV	TTHERM_00048940	CRM1.TTHERM_00048940	CRM1.TTHERM_00048940
HP_HU	NA	NA	NA
HP_IR	NA	NA	NA
HP_MMS	TTHERM_00105270	NA	NA
HP_UV	TTHERM_00470520	NTA1.TTHERM_00470520	NTA1.TTHERM_00470520
HU_IR	TTHERM_00713520	NA	NA
HU_MMS	TTHERM_00572020	GST58	NA
HU_UV	NA	NA	NA
IR_MMS	NA	NA	NA
IR_UV	TTHERM_00312800	NA	NA
MMS_UV	TTHERM_00688570	DSD1.TTHERM_00688570	DSD1.TTHERM_00688570
CPT	TTHERM_00024190	IFA38.TTHERM_00024190	IFA38.TTHERM_00024190
HP	TTHERM_00077080	MRS4.TTHERM_00077080	MRS4.TTHERM_00077080
HU	TTHERM_00344370	NA	NA
IR	TTHERM_00069370	NA	NA
MMS	TTHERM_000474969	NA	NA
UV	TTHERM_00035060	NA	NA
CPT_HP_HU_IR_MMS_UV	TTHERM_00503800	NA	NA
CPT_HP_HU_IR_MMS	NA	NA	NA
CPT_HP_HU_IR_UV	NA	NA	NA
CPT_HP_HU_MMS_UV	NA	NA	NA
CPT_HP_IR_MMS_UV	TTHERM_00418120	NA	NA
CPT_HU_IR_MMS_UV	TTHERM_00854280	TPT1	TPT1.TTHERM_00854280
HP_HU_IR_MMS_UV	NA	NA	NA
CPT_HP_HU_IR	NA	NA	NA
CPT_HP_HU_MMS	NA	NA	NA
CPT_HP_HU_UV	NA	NA	NA
CPT_HP_IR_MMS	NA	NA	NA
CPT_HP_IR_UV	NA	NA	NA
CPT_HP_MMS_UV	TTHERM_00626990	NA	NA
CPT_HU_IR_MMS	NA	NA	NA
CPT_HU_IR_UV	TTHERM_00487030	NA	NA
CPT_HU_MMS_UV	NA	NA	NA
CPT_IR_MMS_UV	TTHERM_00216140	TOP3.TTHERM_00216140	TOP3.TTHERM_00216140
HP_HU_IR_MMS	NA	NA	NA
HP_HU_IR_UV	NA	NA	NA
HP_HU_MMS_UV	NA	NA	NA
HP_IR_MMS_UV	NA	NA	NA
HU_IR_MMS_UV	NA	NA	NA
CPT_HP_IR	NA	NA	NA
CPT_HP_MMS	TTHERM_00455380	NA	NA
CPT_HP_UV	NA	NA	NA
CPT_HU_IR	NA	NA	NA
CPT_HU_MMS	NA	NA	NA
CPT_HU_UV	NA	NA	NA
CPT_IR_MMS	NA	NA	NA
CPT_IR_UV	TTHERM_00239190	NA	NA
CPT_MMS_UV	TTHERM_00304260	NA	NA
HP_HU_IR	NA	NA	NA
HP_HU_MMS	NA	NA	NA
HP_HU_UV	NA	NA	NA
HP_IR_MMS	NA	NA	NA
HP_IR_UV	NA	NA	NA
HP_MMS_UV	NA	NA	NA
HU_IR_MMS	NA	NA	NA
HU_IR_UV	NA	NA	NA
HU_MMS_UV	NA	NA	NA
IR_MMS_UV	NA	NA	NA
CPT_HP	TTHERM_00530130	UTP15	UTP15.TTHERM_00530130
CPT_HU	TTHERM_00526310	GRE3.TTHERM_00526310	GRE3.TTHERM_00526310
CPT_IR	TTHERM_00203010	DPK1	TOR2.TTHERM_00203010
CPT_MMS	TTHERM_001309072	NA	NA
CPT_UV	TTHERM_00049200	SEC27.TTHERM_00049200	SEC27.TTHERM_00049200
HP_HU	NA	NA	NA
HP_IR	NA	NA	NA
HP_MMS	TTHERM_001107329	NA	NA
HP_UV	TTHERM_00472010	NA	NA
HU_IR	TTHERM_00794130	NA	NA
HU_MMS	TTHERM_00623050	LC3B	TRX1.TTHERM_00623050
HU_UV	NA	NA	NA
IR_MMS	NA	NA	NA
IR_UV	TTHERM_00338180	UBP8.TTHERM_00338180	UBP8.TTHERM_00338180
MMS_UV	TTHERM_00825350	NA	NA
CPT	TTHERM_00024450	PML1.TTHERM_00024450	PML1.TTHERM_00024450
HP	TTHERM_001016149	YMR310C.TTHERM_001016149	YMR310C.TTHERM_001016149
HU	TTHERM_00351140	SSA4.TTHERM_00351140	SSA4.TTHERM_00351140
IR	TTHERM_00128810	PDP2	NA
MMS	TTHERM_00049010	NA	NA
UV	TTHERM_000388619	NA	NA
CPT_HP_HU_IR_MMS_UV	TTHERM_00516440	GST27	NA
CPT_HP_HU_IR_MMS	NA	NA	NA
CPT_HP_HU_IR_UV	NA	NA	NA
CPT_HP_HU_MMS_UV	NA	NA	NA
CPT_HP_IR_MMS_UV	TTHERM_00439320	NA	NA
CPT_HU_IR_MMS_UV	TTHERM_00896100	NA	NA
HP_HU_IR_MMS_UV	NA	NA	NA
CPT_HP_HU_IR	NA	NA	NA
CPT_HP_HU_MMS	NA	NA	NA
CPT_HP_HU_UV	NA	NA	NA
CPT_HP_IR_MMS	NA	NA	NA
CPT_HP_IR_UV	NA	NA	NA
CPT_HP_MMS_UV	TTHERM_00630539	NA	NA
CPT_HU_IR_MMS	NA	NA	NA
CPT_HU_IR_UV	TTHERM_00502440	NA	NA
CPT_HU_MMS_UV	NA	NA	NA
CPT_IR_MMS_UV	TTHERM_00218380	UBC45	UBC5.TTHERM_00218380
HP_HU_IR_MMS	NA	NA	NA
HP_HU_IR_UV	NA	NA	NA
HP_HU_MMS_UV	NA	NA	NA
HP_IR_MMS_UV	NA	NA	NA
HU_IR_MMS_UV	NA	NA	NA
CPT_HP_IR	NA	NA	NA
CPT_HP_MMS	TTHERM_00455460	NA	NA
CPT_HP_UV	NA	NA	NA
CPT_HU_IR	NA	NA	NA
CPT_HU_MMS	NA	NA	NA
CPT_HU_UV	NA	NA	NA
CPT_IR_MMS	NA	NA	NA
CPT_IR_UV	TTHERM_00245210	NA	NA
CPT_MMS_UV	TTHERM_00334270	NA	NA
HP_HU_IR	NA	NA	NA
HP_HU_MMS	NA	NA	NA
HP_HU_UV	NA	NA	NA
HP_IR_MMS	NA	NA	NA
HP_IR_UV	NA	NA	NA
HP_MMS_UV	NA	NA	NA
HU_IR_MMS	NA	NA	NA
HU_IR_UV	NA	NA	NA
HU_MMS_UV	NA	NA	NA
IR_MMS_UV	NA	NA	NA
CPT_HP	TTHERM_00530510	EHD3.TTHERM_00530510	EHD3.TTHERM_00530510
CPT_HU	TTHERM_00585280	NA	NA
CPT_IR	TTHERM_00218430	ATM1.TTHERM_00218430	ATM1.TTHERM_00218430
CPT_MMS	TTHERM_00136040	NA	NA
CPT_UV	TTHERM_00051890	NA	NA
HP_HU	NA	NA	NA
HP_IR	NA	NA	NA
HP_MMS	TTHERM_001232262	CMD1.TTHERM_001232262	CMD1.TTHERM_001232262
HP_UV	TTHERM_00691110	ARL1.TTHERM_00691110	ARL1.TTHERM_00691110
HU_IR	TTHERM_00826920	NA	NA
HU_MMS	TTHERM_00689990	GST46	NA
HU_UV	NA	NA	NA
IR_MMS	NA	NA	NA
IR_UV	TTHERM_00338250	NA	NA
MMS_UV	TTHERM_00853170	NA	NA
CPT	TTHERM_000245499	RPB9.TTHERM_000245499	RPB9.TTHERM_000245499
HP	TTHERM_001035531	NA	NA
HU	TTHERM_00390150	NA	NA
IR	TTHERM_00136430	RRM2	NA
MMS	TTHERM_00049190	NA	NA
UV	TTHERM_000402210	NA	NA
CPT_HP_HU_IR_MMS_UV	TTHERM_00540260	ITR2.TTHERM_00540260	ITR2.TTHERM_00540260
CPT_HP_HU_IR_MMS	NA	NA	NA
CPT_HP_HU_IR_UV	NA	NA	NA
CPT_HP_HU_MMS_UV	NA	NA	NA
CPT_HP_IR_MMS_UV	TTHERM_00445900	NA	NA
CPT_HU_IR_MMS_UV	TTHERM_00927240	YMR226C.TTHERM_00927240	YMR226C.TTHERM_00927240
HP_HU_IR_MMS_UV	NA	NA	NA
CPT_HP_HU_IR	NA	NA	NA
CPT_HP_HU_MMS	NA	NA	NA
CPT_HP_HU_UV	NA	NA	NA
CPT_HP_IR_MMS	NA	NA	NA
CPT_HP_IR_UV	NA	NA	NA
CPT_HP_MMS_UV	TTHERM_00802470	ERD2.TTHERM_00802470	ERD2.TTHERM_00802470
CPT_HU_IR_MMS	NA	NA	NA
CPT_HU_IR_UV	TTHERM_00525110	NRK36	NA
CPT_HU_MMS_UV	NA	NA	NA
CPT_IR_MMS_UV	TTHERM_00237490	RAD54	RAD54.TTHERM_00237490
HP_HU_IR_MMS	NA	NA	NA
HP_HU_IR_UV	NA	NA	NA
HP_HU_MMS_UV	NA	NA	NA
HP_IR_MMS_UV	NA	NA	NA
HU_IR_MMS_UV	NA	NA	NA
CPT_HP_IR	NA	NA	NA
CPT_HP_MMS	TTHERM_00476440	NA	NA
CPT_HP_UV	NA	NA	NA
CPT_HU_IR	NA	NA	NA
CPT_HU_MMS	NA	NA	NA
CPT_HU_UV	NA	NA	NA
CPT_IR_MMS	NA	NA	NA
CPT_IR_UV	TTHERM_00249700	YPK9.TTHERM_00249700	YPK9.TTHERM_00249700
CPT_MMS_UV	TTHERM_00354680	NA	NA
HP_HU_IR	NA	NA	NA
HP_HU_MMS	NA	NA	NA
HP_HU_UV	NA	NA	NA
HP_IR_MMS	NA	NA	NA
HP_IR_UV	NA	NA	NA
HP_MMS_UV	NA	NA	NA
HU_IR_MMS	NA	NA	NA
HU_IR_UV	NA	NA	NA
HU_MMS_UV	NA	NA	NA
IR_MMS_UV	NA	NA	NA
CPT_HP	TTHERM_00530680	AIP1	NA
CPT_HU	TTHERM_00637820	TLG2.TTHERM_00637820	TLG2.TTHERM_00637820
CPT_IR	TTHERM_00243960	NA	NA
CPT_MMS	TTHERM_00138280	RIM20.TTHERM_00138280	RIM20.TTHERM_00138280
CPT_UV	TTHERM_00052180	MITS1	NA
HP_HU	NA	NA	NA
HP_IR	NA	NA	NA
HP_MMS	TTHERM_00134930	NA	NA
HP_UV	TTHERM_00718010	NA	NA
HU_IR	TTHERM_01212890	NA	NA
HU_MMS	TTHERM_00787080	CDC50.TTHERM_00787080	CDC50.TTHERM_00787080
HU_UV	NA	NA	NA
IR_MMS	NA	NA	NA
IR_UV	TTHERM_00370740	NA	NA
MMS_UV	TTHERM_00941360	NA	NA
CPT	TTHERM_000285449	NA	NA
HP	TTHERM_00105060	DRH11	DBP1.TTHERM_00105060
HU	TTHERM_00425920	NA	NA
IR	TTHERM_00136490	NA	NA
MMS	TTHERM_00058260	NCP1.TTHERM_00058260	NCP1.TTHERM_00058260
UV	TTHERM_000457049	NA	NA
CPT_HP_HU_IR_MMS_UV	TTHERM_00543570	LSF10	NA
CPT_HP_HU_IR_MMS	NA	NA	NA
CPT_HP_HU_IR_UV	NA	NA	NA
CPT_HP_HU_MMS_UV	NA	NA	NA
CPT_HP_IR_MMS_UV	TTHERM_00448990	FMO1.TTHERM_00448990	FMO1.TTHERM_00448990
CPT_HU_IR_MMS_UV	TTHERM_01027520	UBC7.TTHERM_01027520	UBC7.TTHERM_01027520
HP_HU_IR_MMS_UV	NA	NA	NA
CPT_HP_HU_IR	NA	NA	NA
CPT_HP_HU_MMS	NA	NA	NA
CPT_HP_HU_UV	NA	NA	NA
CPT_HP_IR_MMS	NA	NA	NA
CPT_HP_IR_UV	NA	NA	NA
CPT_HP_MMS_UV	TTHERM_00856680	NA	NA
CPT_HU_IR_MMS	NA	NA	NA
CPT_HU_IR_UV	TTHERM_00532520	NA	NA
CPT_HU_MMS_UV	NA	NA	NA
CPT_IR_MMS_UV	TTHERM_00245250	NA	NA
HP_HU_IR_MMS	NA	NA	NA
HP_HU_IR_UV	NA	NA	NA
HP_HU_MMS_UV	NA	NA	NA
HP_IR_MMS_UV	NA	NA	NA
HU_IR_MMS_UV	NA	NA	NA
CPT_HP_IR	NA	NA	NA
CPT_HP_MMS	TTHERM_00486630	CTH105	NA
CPT_HP_UV	NA	NA	NA
CPT_HU_IR	NA	NA	NA
CPT_HU_MMS	NA	NA	NA
CPT_HU_UV	NA	NA	NA
CPT_IR_MMS	NA	NA	NA
CPT_IR_UV	TTHERM_00274500	GRE3.TTHERM_00274500	GRE3.TTHERM_00274500
CPT_MMS_UV	TTHERM_00411780	NA	NA
HP_HU_IR	NA	NA	NA
HP_HU_MMS	NA	NA	NA
HP_HU_UV	NA	NA	NA
HP_IR_MMS	NA	NA	NA
HP_IR_UV	NA	NA	NA
HP_MMS_UV	NA	NA	NA
HU_IR_MMS	NA	NA	NA
HU_IR_UV	NA	NA	NA
HU_MMS_UV	NA	NA	NA
IR_MMS_UV	NA	NA	NA
CPT_HP	TTHERM_00535830	ARL1.TTHERM_00535830	ARL1.TTHERM_00535830
CPT_HU	TTHERM_00689870	NA	NA
CPT_IR	TTHERM_00263220	BCK1.TTHERM_00263220	BCK1.TTHERM_00263220
CPT_MMS	TTHERM_00138370	ATG7	ATG7.TTHERM_00138370
CPT_UV	TTHERM_00053900	NA	NA
HP_HU	NA	NA	NA
HP_IR	NA	NA	NA
HP_MMS	TTHERM_00160670	ENP2.TTHERM_00160670	ENP2.TTHERM_00160670
HP_UV	TTHERM_00721700	TRZ1.TTHERM_00721700	TRZ1.TTHERM_00721700
HU_IR	NA	NA	NA
HU_MMS	TTHERM_00853100	NA	NA
HU_UV	NA	NA	NA
IR_MMS	NA	NA	NA
IR_UV	TTHERM_00379080	NA	NA
MMS_UV	TTHERM_00962090	YPL088W.TTHERM_00962090	YPL088W.TTHERM_00962090
CPT	TTHERM_00030440	PRE3	PRE3.TTHERM_00030440
HP	TTHERM_00106980	NA	NA
HU	TTHERM_00476710	NA	NA
IR	TTHERM_00138020	MRNN08	NA
MMS	TTHERM_000621609	HDA1.TTHERM_000621609	HDA1.TTHERM_000621609
UV	TTHERM_00048820	NA	NA
CPT_HP_HU_IR_MMS_UV	TTHERM_00569430	NA	NA
CPT_HP_HU_IR_MMS	NA	NA	NA
CPT_HP_HU_IR_UV	NA	NA	NA
CPT_HP_HU_MMS_UV	NA	NA	NA
CPT_HP_IR_MMS_UV	TTHERM_00463280	OLE1	OLE1.TTHERM_00463280
CPT_HU_IR_MMS_UV	TTHERM_01125320	TRZ1.TTHERM_01125320	TRZ1.TTHERM_01125320
HP_HU_IR_MMS_UV	NA	NA	NA
CPT_HP_HU_IR	NA	NA	NA
CPT_HP_HU_MMS	NA	NA	NA
CPT_HP_HU_UV	NA	NA	NA
CPT_HP_IR_MMS	NA	NA	NA
CPT_HP_IR_UV	NA	NA	NA
CPT_HP_MMS_UV	TTHERM_00857790	NA	NA
CPT_HU_IR_MMS	NA	NA	NA
CPT_HU_IR_UV	TTHERM_00585450	ERI2	NA
CPT_HU_MMS_UV	NA	NA	NA
CPT_IR_MMS_UV	TTHERM_00289300	NA	NA
HP_HU_IR_MMS	NA	NA	NA
HP_HU_IR_UV	NA	NA	NA
HP_HU_MMS_UV	NA	NA	NA
HP_IR_MMS_UV	NA	NA	NA
HU_IR_MMS_UV	NA	NA	NA
CPT_HP_IR	NA	NA	NA
CPT_HP_MMS	TTHERM_00494790	HLJ1.TTHERM_00494790	HLJ1.TTHERM_00494790
CPT_HP_UV	NA	NA	NA
CPT_HU_IR	NA	NA	NA
CPT_HU_MMS	NA	NA	NA
CPT_HU_UV	NA	NA	NA
CPT_IR_MMS	NA	NA	NA
CPT_IR_UV	TTHERM_00295590	NA	NA
CPT_MMS_UV	TTHERM_00425880	NA	NA
HP_HU_IR	NA	NA	NA
HP_HU_MMS	NA	NA	NA
HP_HU_UV	NA	NA	NA
HP_IR_MMS	NA	NA	NA
HP_IR_UV	NA	NA	NA
HP_MMS_UV	NA	NA	NA
HU_IR_MMS	NA	NA	NA
HU_IR_UV	NA	NA	NA
HU_MMS_UV	NA	NA	NA
IR_MMS_UV	NA	NA	NA
CPT_HP	TTHERM_00537470	AFG1.TTHERM_00537470	AFG1.TTHERM_00537470
CPT_HU	TTHERM_00853060	NA	NA
CPT_IR	TTHERM_00290660	EFT1.TTHERM_00290660	EFT1.TTHERM_00290660
CPT_MMS	TTHERM_00138600	NA	NA
CPT_UV	TTHERM_00059150	NA	NA
HP_HU	NA	NA	NA
HP_IR	NA	NA	NA
HP_MMS	TTHERM_00185310	NA	NA
HP_UV	TTHERM_00799200	NA	NA
HU_IR	NA	NA	NA
HU_MMS	TTHERM_00957620	NA	NA
HU_UV	NA	NA	NA
IR_MMS	NA	NA	NA
IR_UV	TTHERM_00391310	NA	NA
MMS_UV	TTHERM_01014440	NA	NA
CPT	TTHERM_000313079	DTX1	NA
HP	TTHERM_00112910	RIO2	RIO2.TTHERM_00112910
HU	TTHERM_00488360	IRC20.TTHERM_00488360	IRC20.TTHERM_00488360
IR	TTHERM_00140830	NA	NA
MMS	TTHERM_000627089	NA	NA
UV	TTHERM_00049160	HOS4.TTHERM_00049160	HOS4.TTHERM_00049160
CPT_HP_HU_IR_MMS_UV	TTHERM_00590090	CMB1	NA
CPT_HP_HU_IR_MMS	NA	NA	NA
CPT_HP_HU_IR_UV	NA	NA	NA
CPT_HP_HU_MMS_UV	NA	NA	NA
CPT_HP_IR_MMS_UV	TTHERM_00494070	ADA2.TTHERM_00494070	ADA2.TTHERM_00494070
CPT_HU_IR_MMS_UV	TTHERM_01169380	NA	NA
HP_HU_IR_MMS_UV	NA	NA	NA
CPT_HP_HU_IR	NA	NA	NA
CPT_HP_HU_MMS	NA	NA	NA
CPT_HP_HU_UV	NA	NA	NA
CPT_HP_IR_MMS	NA	NA	NA
CPT_HP_IR_UV	NA	NA	NA
CPT_HP_MMS_UV	TTHERM_00878160	DAL7.TTHERM_00878160	DAL7.TTHERM_00878160
CPT_HU_IR_MMS	NA	NA	NA
CPT_HU_IR_UV	TTHERM_00622960	NA	NA
CPT_HU_MMS_UV	NA	NA	NA
CPT_IR_MMS_UV	TTHERM_00313290	TFB2.TTHERM_00313290	TFB2.TTHERM_00313290
HP_HU_IR_MMS	NA	NA	NA
HP_HU_IR_UV	NA	NA	NA
HP_HU_MMS_UV	NA	NA	NA
HP_IR_MMS_UV	NA	NA	NA
HU_IR_MMS_UV	NA	NA	NA
CPT_HP_IR	NA	NA	NA
CPT_HP_MMS	TTHERM_00531850	NA	NA
CPT_HP_UV	NA	NA	NA
CPT_HU_IR	NA	NA	NA
CPT_HU_MMS	NA	NA	NA
CPT_HU_UV	NA	NA	NA
CPT_IR_MMS	NA	NA	NA
CPT_IR_UV	TTHERM_00295770	NA	NA
CPT_MMS_UV	TTHERM_00456750	TOP2B	TOP2.TTHERM_00456750
HP_HU_IR	NA	NA	NA
HP_HU_MMS	NA	NA	NA
HP_HU_UV	NA	NA	NA
HP_IR_MMS	NA	NA	NA
HP_IR_UV	NA	NA	NA
HP_MMS_UV	NA	NA	NA
HU_IR_MMS	NA	NA	NA
HU_IR_UV	NA	NA	NA
HU_MMS_UV	NA	NA	NA
IR_MMS_UV	NA	NA	NA
CPT_HP	TTHERM_00627190	MCF6	YMC1.TTHERM_00627190
CPT_HU	TTHERM_00856430	PMR1.TTHERM_00856430	PMR1.TTHERM_00856430
CPT_IR	TTHERM_00294750	NA	NA
CPT_MMS	TTHERM_00141170	GPX9	HYR1.TTHERM_00141170
CPT_UV	TTHERM_00059440	NA	NA
HP_HU	NA	NA	NA
HP_IR	NA	NA	NA
HP_MMS	TTHERM_00190620	UTP7	UTP7.TTHERM_00190620
HP_UV	TTHERM_00865240	CDC9.TTHERM_00865240	CDC9.TTHERM_00865240
HU_IR	NA	NA	NA
HU_MMS	TTHERM_01029920	NA	NA
HU_UV	NA	NA	NA
IR_MMS	NA	NA	NA
IR_UV	TTHERM_00411710	YVH1.TTHERM_00411710	YVH1.TTHERM_00411710
MMS_UV	NA	NA	NA
CPT	TTHERM_000339939	RPL40B.TTHERM_000339939	RPL40B.TTHERM_000339939
HP	TTHERM_00114370	SIT4.TTHERM_00114370	SIT4.TTHERM_00114370
HU	TTHERM_00492980	NA	NA
IR	TTHERM_00145350	MPC3.TTHERM_00145350	MPC3.TTHERM_00145350
MMS	TTHERM_00066900	GPI8.TTHERM_00066900	GPI8.TTHERM_00066900
UV	TTHERM_000516450	NA	NA
CPT_HP_HU_IR_MMS_UV	TTHERM_00636920	POLD1	POL3.TTHERM_00636920
CPT_HP_HU_IR_MMS	NA	NA	NA
CPT_HP_HU_IR_UV	NA	NA	NA
CPT_HP_HU_MMS_UV	NA	NA	NA
CPT_HP_IR_MMS_UV	TTHERM_00566790	OTU1.TTHERM_00566790	OTU1.TTHERM_00566790
CPT_HU_IR_MMS_UV	TTHERM_01190440	HOP3	HOP2.TTHERM_01190440
HP_HU_IR_MMS_UV	NA	NA	NA
CPT_HP_HU_IR	NA	NA	NA
CPT_HP_HU_MMS	NA	NA	NA
CPT_HP_HU_UV	NA	NA	NA
CPT_HP_IR_MMS	NA	NA	NA
CPT_HP_IR_UV	NA	NA	NA
CPT_HP_MMS_UV	TTHERM_00947480	NA	NA
CPT_HU_IR_MMS	NA	NA	NA
CPT_HU_IR_UV	TTHERM_00649470	NA	NA
CPT_HU_MMS_UV	NA	NA	NA
CPT_IR_MMS_UV	TTHERM_00316410	RAD3.TTHERM_00316410	RAD3.TTHERM_00316410
HP_HU_IR_MMS	NA	NA	NA
HP_HU_IR_UV	NA	NA	NA
HP_HU_MMS_UV	NA	NA	NA
HP_IR_MMS_UV	NA	NA	NA
HU_IR_MMS_UV	NA	NA	NA
CPT_HP_IR	NA	NA	NA
CPT_HP_MMS	TTHERM_00537220	AVT4.TTHERM_00537220	AVT4.TTHERM_00537220
CPT_HP_UV	NA	NA	NA
CPT_HU_IR	NA	NA	NA
CPT_HU_MMS	NA	NA	NA
CPT_HU_UV	NA	NA	NA
CPT_IR_MMS	NA	NA	NA
CPT_IR_UV	TTHERM_00307650	NA	NA
CPT_MMS_UV	TTHERM_00459380	NA	NA
HP_HU_IR	NA	NA	NA
HP_HU_MMS	NA	NA	NA
HP_HU_UV	NA	NA	NA
HP_IR_MMS	NA	NA	NA
HP_IR_UV	NA	NA	NA
HP_MMS_UV	NA	NA	NA
HU_IR_MMS	NA	NA	NA
HU_IR_UV	NA	NA	NA
HU_MMS_UV	NA	NA	NA
IR_MMS_UV	NA	NA	NA
CPT_HP	TTHERM_00649150	NA	NA
CPT_HU	TTHERM_00898250	RRM52	RNA15.TTHERM_00898250
CPT_IR	TTHERM_00301910	NA	NA
CPT_MMS	TTHERM_00142380	BroW-1	TIF34.TTHERM_00142380
CPT_UV	TTHERM_000653668	COQ2.TTHERM_000653668	COQ2.TTHERM_000653668
HP_HU	NA	NA	NA
HP_IR	NA	NA	NA
HP_MMS	TTHERM_00194770	NA	NA
HP_UV	TTHERM_00935460	NA	NA
HU_IR	NA	NA	NA
HU_MMS	TTHERM_01049360	GSH2.TTHERM_01049360	GSH2.TTHERM_01049360
HU_UV	NA	NA	NA
IR_MMS	NA	NA	NA
IR_UV	TTHERM_00414420	NA	NA
MMS_UV	NA	NA	NA
CPT	TTHERM_00035070	YKL021C.TTHERM_00035070	YKL021C.TTHERM_00035070
HP	TTHERM_00131240	DRH8	MAK5.TTHERM_00131240
HU	TTHERM_00497310	NA	NA
IR	TTHERM_00145900	NA	NA
MMS	TTHERM_000672289	NA	NA
UV	TTHERM_00051740	PPI12	CPR3.TTHERM_00051740
CPT_HP_HU_IR_MMS_UV	TTHERM_00654150	NA	NA
CPT_HP_HU_IR_MMS	NA	NA	NA
CPT_HP_HU_IR_UV	NA	NA	NA
CPT_HP_HU_MMS_UV	NA	NA	NA
CPT_HP_IR_MMS_UV	TTHERM_00624400	MAP2.TTHERM_00624400	MAP2.TTHERM_00624400
CPT_HU_IR_MMS_UV	TTHERM_01347930	YCT1.TTHERM_01347930	YCT1.TTHERM_01347930
HP_HU_IR_MMS_UV	NA	NA	NA
CPT_HP_HU_IR	NA	NA	NA
CPT_HP_HU_MMS	NA	NA	NA
CPT_HP_HU_UV	NA	NA	NA
CPT_HP_IR_MMS	NA	NA	NA
CPT_HP_IR_UV	NA	NA	NA
CPT_HP_MMS_UV	TTHERM_01141570	ICL1	ICL1.TTHERM_01141570
CPT_HU_IR_MMS	NA	NA	NA
CPT_HU_IR_UV	TTHERM_00859320	PSD1.TTHERM_00859320	PSD1.TTHERM_00859320
CPT_HU_MMS_UV	NA	NA	NA
CPT_IR_MMS_UV	TTHERM_00322860	YPK9.TTHERM_00322860	YPK9.TTHERM_00322860
HP_HU_IR_MMS	NA	NA	NA
HP_HU_IR_UV	NA	NA	NA
HP_HU_MMS_UV	NA	NA	NA
HP_IR_MMS_UV	NA	NA	NA
HU_IR_MMS_UV	NA	NA	NA
CPT_HP_IR	NA	NA	NA
CPT_HP_MMS	TTHERM_00554590	NA	NA
CPT_HP_UV	NA	NA	NA
CPT_HU_IR	NA	NA	NA
CPT_HU_MMS	NA	NA	NA
CPT_HU_UV	NA	NA	NA
CPT_IR_MMS	NA	NA	NA
CPT_IR_UV	TTHERM_00312770	PFS2.TTHERM_00312770	PFS2.TTHERM_00312770
CPT_MMS_UV	TTHERM_00470960	NA	NA
HP_HU_IR	NA	NA	NA
HP_HU_MMS	NA	NA	NA
HP_HU_UV	NA	NA	NA
HP_IR_MMS	NA	NA	NA
HP_IR_UV	NA	NA	NA
HP_MMS_UV	NA	NA	NA
HU_IR_MMS	NA	NA	NA
HU_IR_UV	NA	NA	NA
HU_MMS_UV	NA	NA	NA
IR_MMS_UV	NA	NA	NA
CPT_HP	TTHERM_00756370	IZH2.TTHERM_00756370	IZH2.TTHERM_00756370
CPT_HU	TTHERM_01084290	YHL018W.TTHERM_01084290	YHL018W.TTHERM_01084290
CPT_IR	TTHERM_00318750	NA	NA
CPT_MMS	TTHERM_00145210	ADH3.TTHERM_00145210	ADH3.TTHERM_00145210
CPT_UV	TTHERM_000686039	NA	NA
HP_HU	NA	NA	NA
HP_IR	NA	NA	NA
HP_MMS	TTHERM_00220990	SNF1.TTHERM_00220990	SNF1.TTHERM_00220990
HP_UV	TTHERM_00954270	NA	NA
HU_IR	NA	NA	NA
HU_MMS	TTHERM_01085680	YMR226C.TTHERM_01085680	YMR226C.TTHERM_01085680
HU_UV	NA	NA	NA
IR_MMS	NA	NA	NA
IR_UV	TTHERM_00467770	PCP3	NA
MMS_UV	NA	NA	NA
CPT	TTHERM_000355952	NA	NA
HP	TTHERM_00137920	REI1.TTHERM_00137920	REI1.TTHERM_00137920
HU	TTHERM_00497550	NA	NA
IR	TTHERM_00146070	NA	NA
MMS	TTHERM_00069180	PNS1.TTHERM_00069180	PNS1.TTHERM_00069180
UV	TTHERM_000522479	NA	NA
CPT_HP_HU_IR_MMS_UV	TTHERM_00656060	NA	NA
CPT_HP_HU_IR_MMS	NA	NA	NA
CPT_HP_HU_IR_UV	NA	NA	NA
CPT_HP_HU_MMS_UV	NA	NA	NA
CPT_HP_IR_MMS_UV	TTHERM_00628390	NA	NA
CPT_HU_IR_MMS_UV	NA	NA	NA
HP_HU_IR_MMS_UV	NA	NA	NA
CPT_HP_HU_IR	NA	NA	NA
CPT_HP_HU_MMS	NA	NA	NA
CPT_HP_HU_UV	NA	NA	NA
CPT_HP_IR_MMS	NA	NA	NA
CPT_HP_IR_UV	NA	NA	NA
CPT_HP_MMS_UV	NA	NA	NA
CPT_HU_IR_MMS	NA	NA	NA
CPT_HU_IR_UV	TTHERM_00923170	TPA9	YPK9.TTHERM_00923170
CPT_HU_MMS_UV	NA	NA	NA
CPT_IR_MMS_UV	TTHERM_00348900	NA	NA
HP_HU_IR_MMS	NA	NA	NA
HP_HU_IR_UV	NA	NA	NA
HP_HU_MMS_UV	NA	NA	NA
HP_IR_MMS_UV	NA	NA	NA
HU_IR_MMS_UV	NA	NA	NA
CPT_HP_IR	NA	NA	NA
CPT_HP_MMS	TTHERM_00564370	TOS3.TTHERM_00564370	TOS3.TTHERM_00564370
CPT_HP_UV	NA	NA	NA
CPT_HU_IR	NA	NA	NA
CPT_HU_MMS	NA	NA	NA
CPT_HU_UV	NA	NA	NA
CPT_IR_MMS	NA	NA	NA
CPT_IR_UV	TTHERM_00313340	YIR042C.TTHERM_00313340	YIR042C.TTHERM_00313340
CPT_MMS_UV	TTHERM_00471850	NA	NA
HP_HU_IR	NA	NA	NA
HP_HU_MMS	NA	NA	NA
HP_HU_UV	NA	NA	NA
HP_IR_MMS	NA	NA	NA
HP_IR_UV	NA	NA	NA
HP_MMS_UV	NA	NA	NA
HU_IR_MMS	NA	NA	NA
HU_IR_UV	NA	NA	NA
HU_MMS_UV	NA	NA	NA
IR_MMS_UV	NA	NA	NA
CPT_HP	TTHERM_00758950	ERG3.TTHERM_00758950	ERG3.TTHERM_00758950
CPT_HU	TTHERM_01216060	PDE2.TTHERM_01216060	PDE2.TTHERM_01216060
CPT_IR	TTHERM_00348290	KIP1.TTHERM_00348290	KIP1.TTHERM_00348290
CPT_MMS	TTHERM_00145230	ZTA1.TTHERM_00145230	ZTA1.TTHERM_00145230
CPT_UV	TTHERM_00069260	NA	NA
HP_HU	NA	NA	NA
HP_IR	NA	NA	NA
HP_MMS	TTHERM_00221130	GRT2	NA
HP_UV	TTHERM_00971960	NA	NA
HU_IR	NA	NA	NA
HU_MMS	TTHERM_01398470	ERG5.TTHERM_01398470	ERG5.TTHERM_01398470
HU_UV	NA	NA	NA
IR_MMS	NA	NA	NA
IR_UV	TTHERM_00471950	NA	NA
MMS_UV	NA	NA	NA
CPT	TTHERM_00037280	NA	NA
HP	TTHERM_00140860	NA	NA
HU	TTHERM_00515220	NA	NA
IR	TTHERM_00151530	NA	NA
MMS	TTHERM_00077370	UBP12.TTHERM_00077370	UBP12.TTHERM_00077370
UV	TTHERM_00052520	NA	NA
CPT_HP_HU_IR_MMS_UV	TTHERM_00661570	GST39	NA
CPT_HP_HU_IR_MMS	NA	NA	NA
CPT_HP_HU_IR_UV	NA	NA	NA
CPT_HP_HU_MMS_UV	NA	NA	NA
CPT_HP_IR_MMS_UV	TTHERM_00661740	NA	NA
CPT_HU_IR_MMS_UV	NA	NA	NA
HP_HU_IR_MMS_UV	NA	NA	NA
CPT_HP_HU_IR	NA	NA	NA
CPT_HP_HU_MMS	NA	NA	NA
CPT_HP_HU_UV	NA	NA	NA
CPT_HP_IR_MMS	NA	NA	NA
CPT_HP_IR_UV	NA	NA	NA
CPT_HP_MMS_UV	NA	NA	NA
CPT_HU_IR_MMS	NA	NA	NA
CPT_HU_IR_UV	TTHERM_01164050	NA	NA
CPT_HU_MMS_UV	NA	NA	NA
CPT_IR_MMS_UV	TTHERM_00361740	CDC15.TTHERM_00361740	CDC15.TTHERM_00361740
HP_HU_IR_MMS	NA	NA	NA
HP_HU_IR_UV	NA	NA	NA
HP_HU_MMS_UV	NA	NA	NA
HP_IR_MMS_UV	NA	NA	NA
HU_IR_MMS_UV	NA	NA	NA
CPT_HP_IR	NA	NA	NA
CPT_HP_MMS	TTHERM_00565580	NA	NA
CPT_HP_UV	NA	NA	NA
CPT_HU_IR	NA	NA	NA
CPT_HU_MMS	NA	NA	NA
CPT_HU_UV	NA	NA	NA
CPT_IR_MMS	NA	NA	NA
CPT_IR_UV	TTHERM_00317030	SLU7.TTHERM_00317030	SLU7.TTHERM_00317030
CPT_MMS_UV	TTHERM_00526780	NA	NA
HP_HU_IR	NA	NA	NA
HP_HU_MMS	NA	NA	NA
HP_HU_UV	NA	NA	NA
HP_IR_MMS	NA	NA	NA
HP_IR_UV	NA	NA	NA
HP_MMS_UV	NA	NA	NA
HU_IR_MMS	NA	NA	NA
HU_IR_UV	NA	NA	NA
HU_MMS_UV	NA	NA	NA
IR_MMS_UV	NA	NA	NA
CPT_HP	TTHERM_00773160	POX1.TTHERM_00773160	POX1.TTHERM_00773160
CPT_HU	NA	NA	NA
CPT_IR	TTHERM_00370830	RUD3.TTHERM_00370830	RUD3.TTHERM_00370830
CPT_MMS	TTHERM_00145260	GAL1.TTHERM_00145260	GAL1.TTHERM_00145260
CPT_UV	TTHERM_00069280	NA	NA
HP_HU	NA	NA	NA
HP_IR	NA	NA	NA
HP_MMS	TTHERM_00259420	RKM4.TTHERM_00259420	RKM4.TTHERM_00259420
HP_UV	TTHERM_00974260	ERS1	MSE1.TTHERM_00974260
HU_IR	NA	NA	NA
HU_MMS	NA	NA	NA
HU_UV	NA	NA	NA
IR_MMS	NA	NA	NA
IR_UV	TTHERM_00483520	NA	NA
MMS_UV	NA	NA	NA
CPT	TTHERM_00038820	DAK2.TTHERM_00038820	DAK2.TTHERM_00038820
HP	TTHERM_00143670	NA	NA
HU	TTHERM_00532170	NA	NA
IR	TTHERM_00161530	NA	NA
MMS	TTHERM_00077380	NA	NA
UV	TTHERM_000535459	NA	NA
CPT_HP_HU_IR_MMS_UV	TTHERM_00700900	TPA2	PMR1.TTHERM_00700900
CPT_HP_HU_IR_MMS	NA	NA	NA
CPT_HP_HU_IR_UV	NA	NA	NA
CPT_HP_HU_MMS_UV	NA	NA	NA
CPT_HP_IR_MMS_UV	TTHERM_00683060	CTH115	NA
CPT_HU_IR_MMS_UV	NA	NA	NA
HP_HU_IR_MMS_UV	NA	NA	NA
CPT_HP_HU_IR	NA	NA	NA
CPT_HP_HU_MMS	NA	NA	NA
CPT_HP_HU_UV	NA	NA	NA
CPT_HP_IR_MMS	NA	NA	NA
CPT_HP_IR_UV	NA	NA	NA
CPT_HP_MMS_UV	NA	NA	NA
CPT_HU_IR_MMS	NA	NA	NA
CPT_HU_IR_UV	TTHERM_01276440	NA	NA
CPT_HU_MMS_UV	NA	NA	NA
CPT_IR_MMS_UV	TTHERM_00382290	MNDP1	MND1.TTHERM_00382290
HP_HU_IR_MMS	NA	NA	NA
HP_HU_IR_UV	NA	NA	NA
HP_HU_MMS_UV	NA	NA	NA
HP_IR_MMS_UV	NA	NA	NA
HU_IR_MMS_UV	NA	NA	NA
CPT_HP_IR	NA	NA	NA
CPT_HP_MMS	TTHERM_00585170	CCF11	NA
CPT_HP_UV	NA	NA	NA
CPT_HU_IR	NA	NA	NA
CPT_HU_MMS	NA	NA	NA
CPT_HU_UV	NA	NA	NA
CPT_IR_MMS	NA	NA	NA
CPT_IR_UV	TTHERM_00371210	NA	NA
CPT_MMS_UV	TTHERM_00529570	NA	NA
HP_HU_IR	NA	NA	NA
HP_HU_MMS	NA	NA	NA
HP_HU_UV	NA	NA	NA
HP_IR_MMS	NA	NA	NA
HP_IR_UV	NA	NA	NA
HP_MMS_UV	NA	NA	NA
HU_IR_MMS	NA	NA	NA
HU_IR_UV	NA	NA	NA
HU_MMS_UV	NA	NA	NA
IR_MMS_UV	NA	NA	NA
CPT_HP	TTHERM_00784310	NA	NA
CPT_HU	NA	NA	NA
CPT_IR	TTHERM_00389900	NA	NA
CPT_MMS	TTHERM_00145990	PYK2	CDC19.TTHERM_00145990
CPT_UV	TTHERM_00069369	NA	NA
HP_HU	NA	NA	NA
HP_IR	NA	NA	NA
HP_MMS	TTHERM_00263290	NA	NA
HP_UV	NA	NA	NA
HU_IR	NA	NA	NA
HU_MMS	NA	NA	NA
HU_UV	NA	NA	NA
IR_MMS	NA	NA	NA
IR_UV	TTHERM_00497640	NA	NA
MMS_UV	NA	NA	NA
CPT	TTHERM_00038850	NA	NA
HP	TTHERM_00149620	NA	NA
HU	TTHERM_00548310	DUN1.TTHERM_00548310	DUN1.TTHERM_00548310
IR	TTHERM_00188440	ATM1.TTHERM_00188440	ATM1.TTHERM_00188440
MMS	TTHERM_000784679	IXR1.TTHERM_000784679	IXR1.TTHERM_000784679
UV	TTHERM_00056120	COQ11.TTHERM_00056120	COQ11.TTHERM_00056120
CPT_HP_HU_IR_MMS_UV	TTHERM_00862710	NA	NA
CPT_HP_HU_IR_MMS	NA	NA	NA
CPT_HP_HU_IR_UV	NA	NA	NA
CPT_HP_HU_MMS_UV	NA	NA	NA
CPT_HP_IR_MMS_UV	TTHERM_00685900	STE6.TTHERM_00685900	STE6.TTHERM_00685900
CPT_HU_IR_MMS_UV	NA	NA	NA
HP_HU_IR_MMS_UV	NA	NA	NA
CPT_HP_HU_IR	NA	NA	NA
CPT_HP_HU_MMS	NA	NA	NA
CPT_HP_HU_UV	NA	NA	NA
CPT_HP_IR_MMS	NA	NA	NA
CPT_HP_IR_UV	NA	NA	NA
CPT_HP_MMS_UV	NA	NA	NA
CPT_HU_IR_MMS	NA	NA	NA
CPT_HU_IR_UV	NA	NA	NA
CPT_HU_MMS_UV	NA	NA	NA
CPT_IR_MMS_UV	TTHERM_00392720	NA	NA
HP_HU_IR_MMS	NA	NA	NA
HP_HU_IR_UV	NA	NA	NA
HP_HU_MMS_UV	NA	NA	NA
HP_IR_MMS_UV	NA	NA	NA
HU_IR_MMS_UV	NA	NA	NA
CPT_HP_IR	NA	NA	NA
CPT_HP_MMS	TTHERM_00696900	NA	NA
CPT_HP_UV	NA	NA	NA
CPT_HU_IR	NA	NA	NA
CPT_HU_MMS	NA	NA	NA
CPT_HU_UV	NA	NA	NA
CPT_IR_MMS	NA	NA	NA
CPT_IR_UV	TTHERM_00373770	NA	NA
CPT_MMS_UV	TTHERM_00529800	NA	NA
HP_HU_IR	NA	NA	NA
HP_HU_MMS	NA	NA	NA
HP_HU_UV	NA	NA	NA
HP_IR_MMS	NA	NA	NA
HP_IR_UV	NA	NA	NA
HP_MMS_UV	NA	NA	NA
HU_IR_MMS	NA	NA	NA
HU_IR_UV	NA	NA	NA
HU_MMS_UV	NA	NA	NA
IR_MMS_UV	NA	NA	NA
CPT_HP	TTHERM_00835490	NA	NA
CPT_HU	NA	NA	NA
CPT_IR	TTHERM_00404270	NA	NA
CPT_MMS	TTHERM_00147560	PRE1	PRE1.TTHERM_00147560
CPT_UV	TTHERM_00078900	NA	NA
HP_HU	NA	NA	NA
HP_IR	NA	NA	NA
HP_MMS	TTHERM_00265100	YPK9.TTHERM_00265100	YPK9.TTHERM_00265100
HP_UV	NA	NA	NA
HU_IR	NA	NA	NA
HU_MMS	NA	NA	NA
HU_UV	NA	NA	NA
IR_MMS	NA	NA	NA
IR_UV	TTHERM_00547950	SFR6	MEX67.TTHERM_00547950
MMS_UV	NA	NA	NA
CPT	TTHERM_000420396	NA	NA
HP	TTHERM_00151360	NA	NA
HU	TTHERM_00554630	NA	NA
IR	TTHERM_00193880	UBP15.TTHERM_00193880	UBP15.TTHERM_00193880
MMS	TTHERM_00079720	VPS60.TTHERM_00079720	VPS60.TTHERM_00079720
UV	TTHERM_000564159	NA	NA
CPT_HP_HU_IR_MMS_UV	TTHERM_00863830	NA	NA
CPT_HP_HU_IR_MMS	NA	NA	NA
CPT_HP_HU_IR_UV	NA	NA	NA
CPT_HP_HU_MMS_UV	NA	NA	NA
CPT_HP_IR_MMS_UV	TTHERM_00951920	NA	NA
CPT_HU_IR_MMS_UV	NA	NA	NA
HP_HU_IR_MMS_UV	NA	NA	NA
CPT_HP_HU_IR	NA	NA	NA
CPT_HP_HU_MMS	NA	NA	NA
CPT_HP_HU_UV	NA	NA	NA
CPT_HP_IR_MMS	NA	NA	NA
CPT_HP_IR_UV	NA	NA	NA
CPT_HP_MMS_UV	NA	NA	NA
CPT_HU_IR_MMS	NA	NA	NA
CPT_HU_IR_UV	NA	NA	NA
CPT_HU_MMS_UV	NA	NA	NA
CPT_IR_MMS_UV	TTHERM_00420200	NA	NA
HP_HU_IR_MMS	NA	NA	NA
HP_HU_IR_UV	NA	NA	NA
HP_HU_MMS_UV	NA	NA	NA
HP_IR_MMS_UV	NA	NA	NA
HU_IR_MMS_UV	NA	NA	NA
CPT_HP_IR	NA	NA	NA
CPT_HP_MMS	TTHERM_00699780	YNR064C.TTHERM_00699780	YNR064C.TTHERM_00699780
CPT_HP_UV	NA	NA	NA
CPT_HU_IR	NA	NA	NA
CPT_HU_MMS	NA	NA	NA
CPT_HU_UV	NA	NA	NA
CPT_IR_MMS	NA	NA	NA
CPT_IR_UV	TTHERM_00378430	NA	NA
CPT_MMS_UV	TTHERM_00530640	NA	NA
HP_HU_IR	NA	NA	NA
HP_HU_MMS	NA	NA	NA
HP_HU_UV	NA	NA	NA
HP_IR_MMS	NA	NA	NA
HP_IR_UV	NA	NA	NA
HP_MMS_UV	NA	NA	NA
HU_IR_MMS	NA	NA	NA
HU_IR_UV	NA	NA	NA
HU_MMS_UV	NA	NA	NA
IR_MMS_UV	NA	NA	NA
CPT_HP	TTHERM_00854230	YLR118C.TTHERM_00854230	YLR118C.TTHERM_00854230
CPT_HU	NA	NA	NA
CPT_IR	TTHERM_00408840	NA	NA
CPT_MMS	TTHERM_00149900	PAP3	PAP1.TTHERM_00149900
CPT_UV	TTHERM_00079210	NA	NA
HP_HU	NA	NA	NA
HP_IR	NA	NA	NA
HP_MMS	TTHERM_00277380	NA	NA
HP_UV	NA	NA	NA
HU_IR	NA	NA	NA
HU_MMS	NA	NA	NA
HU_UV	NA	NA	NA
IR_MMS	NA	NA	NA
IR_UV	TTHERM_00564440	CTH35	NA
MMS_UV	NA	NA	NA
CPT	TTHERM_000431188	NA	NA
HP	TTHERM_00155480	PCP1.TTHERM_00155480	PCP1.TTHERM_00155480
HU	TTHERM_00554640	NA	NA
IR	TTHERM_00194420	CDC27.TTHERM_00194420	CDC27.TTHERM_00194420
MMS	TTHERM_000920819	NA	NA
UV	TTHERM_000577049	NA	NA
CPT_HP_HU_IR_MMS_UV	TTHERM_01169430	NA	NA
CPT_HP_HU_IR_MMS	NA	NA	NA
CPT_HP_HU_IR_UV	NA	NA	NA
CPT_HP_HU_MMS_UV	NA	NA	NA
CPT_HP_IR_MMS_UV	TTHERM_00989450	GLY1.TTHERM_00989450	GLY1.TTHERM_00989450
CPT_HU_IR_MMS_UV	NA	NA	NA
HP_HU_IR_MMS_UV	NA	NA	NA
CPT_HP_HU_IR	NA	NA	NA
CPT_HP_HU_MMS	NA	NA	NA
CPT_HP_HU_UV	NA	NA	NA
CPT_HP_IR_MMS	NA	NA	NA
CPT_HP_IR_UV	NA	NA	NA
CPT_HP_MMS_UV	NA	NA	NA
CPT_HU_IR_MMS	NA	NA	NA
CPT_HU_IR_UV	NA	NA	NA
CPT_HU_MMS_UV	NA	NA	NA
CPT_IR_MMS_UV	TTHERM_00426230	MSH3	MSH6.TTHERM_00426230
HP_HU_IR_MMS	NA	NA	NA
HP_HU_IR_UV	NA	NA	NA
HP_HU_MMS_UV	NA	NA	NA
HP_IR_MMS_UV	NA	NA	NA
HU_IR_MMS_UV	NA	NA	NA
CPT_HP_IR	NA	NA	NA
CPT_HP_MMS	TTHERM_00760200	CEG1	CEG1.TTHERM_00760200
CPT_HP_UV	NA	NA	NA
CPT_HU_IR	NA	NA	NA
CPT_HU_MMS	NA	NA	NA
CPT_HU_UV	NA	NA	NA
CPT_IR_MMS	NA	NA	NA
CPT_IR_UV	TTHERM_00388600	NA	NA
CPT_MMS_UV	TTHERM_00540350	PUS7.TTHERM_00540350	PUS7.TTHERM_00540350
HP_HU_IR	NA	NA	NA
HP_HU_MMS	NA	NA	NA
HP_HU_UV	NA	NA	NA
HP_IR_MMS	NA	NA	NA
HP_IR_UV	NA	NA	NA
HP_MMS_UV	NA	NA	NA
HU_IR_MMS	NA	NA	NA
HU_IR_UV	NA	NA	NA
HU_MMS_UV	NA	NA	NA
IR_MMS_UV	NA	NA	NA
CPT_HP	TTHERM_00942990	PRP45.TTHERM_00942990	PRP45.TTHERM_00942990
CPT_HU	NA	NA	NA
CPT_IR	TTHERM_00419760	PFS2.TTHERM_00419760	PFS2.TTHERM_00419760
CPT_MMS	TTHERM_00150030	NPT1.TTHERM_00150030	NPT1.TTHERM_00150030
CPT_UV	TTHERM_000836611	NA	NA
HP_HU	NA	NA	NA
HP_IR	NA	NA	NA
HP_MMS	TTHERM_00286770	CDK4	CDC28.TTHERM_00286770
HP_UV	NA	NA	NA
HU_IR	NA	NA	NA
HU_MMS	NA	NA	NA
HU_UV	NA	NA	NA
IR_MMS	NA	NA	NA
IR_UV	TTHERM_00569480	NA	NA
MMS_UV	NA	NA	NA
CPT	TTHERM_00043810	BCD1.TTHERM_00043810	BCD1.TTHERM_00043810
HP	TTHERM_00161750	NA	NA
HU	TTHERM_00590370	TCE1	YDL206W.TTHERM_00590370
IR	TTHERM_00197740	LEA1.TTHERM_00197740	LEA1.TTHERM_00197740
MMS	TTHERM_000922939	NA	NA
UV	TTHERM_00058550	SSC1.TTHERM_00058550	SSC1.TTHERM_00058550
CPT_HP_HU_IR_MMS_UV	TTHERM_01211770	GVT1	NA
CPT_HP_HU_IR_MMS	NA	NA	NA
CPT_HP_HU_IR_UV	NA	NA	NA
CPT_HP_HU_MMS_UV	NA	NA	NA
CPT_HP_IR_MMS_UV	TTHERM_01027470	NA	NA
CPT_HU_IR_MMS_UV	NA	NA	NA
HP_HU_IR_MMS_UV	NA	NA	NA
CPT_HP_HU_IR	NA	NA	NA
CPT_HP_HU_MMS	NA	NA	NA
CPT_HP_HU_UV	NA	NA	NA
CPT_HP_IR_MMS	NA	NA	NA
CPT_HP_IR_UV	NA	NA	NA
CPT_HP_MMS_UV	NA	NA	NA
CPT_HU_IR_MMS	NA	NA	NA
CPT_HU_IR_UV	NA	NA	NA
CPT_HU_MMS_UV	NA	NA	NA
CPT_IR_MMS_UV	TTHERM_00427560	NA	NA
HP_HU_IR_MMS	NA	NA	NA
HP_HU_IR_UV	NA	NA	NA
HP_HU_MMS_UV	NA	NA	NA
HP_IR_MMS_UV	NA	NA	NA
HU_IR_MMS_UV	NA	NA	NA
CPT_HP_IR	NA	NA	NA
CPT_HP_MMS	TTHERM_00784540	NA	NA
CPT_HP_UV	NA	NA	NA
CPT_HU_IR	NA	NA	NA
CPT_HU_MMS	NA	NA	NA
CPT_HU_UV	NA	NA	NA
CPT_IR_MMS	NA	NA	NA
CPT_IR_UV	TTHERM_00404210	NA	NA
CPT_MMS_UV	TTHERM_00571880	PRI1	PRI1.TTHERM_00571880
HP_HU_IR	NA	NA	NA
HP_HU_MMS	NA	NA	NA
HP_HU_UV	NA	NA	NA
HP_IR_MMS	NA	NA	NA
HP_IR_UV	NA	NA	NA
HP_MMS_UV	NA	NA	NA
HU_IR_MMS	NA	NA	NA
HU_IR_UV	NA	NA	NA
HU_MMS_UV	NA	NA	NA
IR_MMS_UV	NA	NA	NA
CPT_HP	TTHERM_00976490	NOC1	MAK21.TTHERM_00976490
CPT_HU	NA	NA	NA
CPT_IR	TTHERM_00446350	TSR4.TTHERM_00446350	TSR4.TTHERM_00446350
CPT_MMS	TTHERM_00151670	ADH3.TTHERM_00151670	ADH3.TTHERM_00151670
CPT_UV	TTHERM_00091770	NA	NA
HP_HU	NA	NA	NA
HP_IR	NA	NA	NA
HP_MMS	TTHERM_00310660	ATE1.TTHERM_00310660	ATE1.TTHERM_00310660
HP_UV	NA	NA	NA
HU_IR	NA	NA	NA
HU_MMS	NA	NA	NA
HU_UV	NA	NA	NA
IR_MMS	NA	NA	NA
IR_UV	TTHERM_00584670	NA	NA
MMS_UV	NA	NA	NA
CPT	TTHERM_00043880	PUP2	PUP2.TTHERM_00043880
HP	TTHERM_00162870	NA	NA
HU	TTHERM_00637810	YPK2	YPK2.TTHERM_00637810
IR	TTHERM_00218360	NA	NA
MMS	TTHERM_00092790	SAF1	NA
UV	TTHERM_00058820	AXE1	RRP6.TTHERM_00058820
CPT_HP_HU_IR_MMS_UV	TTHERM_01309080	IMO32.TTHERM_01309080	IMO32.TTHERM_01309080
CPT_HP_HU_IR_MMS	NA	NA	NA
CPT_HP_HU_IR_UV	NA	NA	NA
CPT_HP_HU_MMS_UV	NA	NA	NA
CPT_HP_IR_MMS_UV	TTHERM_01124100	FAA2.TTHERM_01124100	FAA2.TTHERM_01124100
CPT_HU_IR_MMS_UV	NA	NA	NA
HP_HU_IR_MMS_UV	NA	NA	NA
CPT_HP_HU_IR	NA	NA	NA
CPT_HP_HU_MMS	NA	NA	NA
CPT_HP_HU_UV	NA	NA	NA
CPT_HP_IR_MMS	NA	NA	NA
CPT_HP_IR_UV	NA	NA	NA
CPT_HP_MMS_UV	NA	NA	NA
CPT_HU_IR_MMS	NA	NA	NA
CPT_HU_IR_UV	NA	NA	NA
CPT_HU_MMS_UV	NA	NA	NA
CPT_IR_MMS_UV	TTHERM_00437590	NA	NA
HP_HU_IR_MMS	NA	NA	NA
HP_HU_IR_UV	NA	NA	NA
HP_HU_MMS_UV	NA	NA	NA
HP_IR_MMS_UV	NA	NA	NA
HU_IR_MMS_UV	NA	NA	NA
CPT_HP_IR	NA	NA	NA
CPT_HP_MMS	TTHERM_00824040	APC1	APC1.TTHERM_00824040
CPT_HP_UV	NA	NA	NA
CPT_HU_IR	NA	NA	NA
CPT_HU_MMS	NA	NA	NA
CPT_HU_UV	NA	NA	NA
CPT_IR_MMS	NA	NA	NA
CPT_IR_UV	TTHERM_00448660	NA	NA
CPT_MMS_UV	TTHERM_00575520	MPK4	FUS3.TTHERM_00575520
HP_HU_IR	NA	NA	NA
HP_HU_MMS	NA	NA	NA
HP_HU_UV	NA	NA	NA
HP_IR_MMS	NA	NA	NA
HP_IR_UV	NA	NA	NA
HP_MMS_UV	NA	NA	NA
HU_IR_MMS	NA	NA	NA
HU_IR_UV	NA	NA	NA
HU_MMS_UV	NA	NA	NA
IR_MMS_UV	NA	NA	NA
CPT_HP	TTHERM_00979770	TRA2	TRA1.TTHERM_00979770
CPT_HU	NA	NA	NA
CPT_IR	TTHERM_00490740	NA	NA
CPT_MMS	TTHERM_00188350	NA	NA
CPT_UV	TTHERM_001001498	NA	NA
HP_HU	NA	NA	NA
HP_IR	NA	NA	NA
HP_MMS	TTHERM_00339670	NA	NA
HP_UV	NA	NA	NA
HU_IR	NA	NA	NA
HU_MMS	NA	NA	NA
HU_UV	NA	NA	NA
IR_MMS	NA	NA	NA
IR_UV	TTHERM_00586800	NA	NA
MMS_UV	NA	NA	NA
CPT	TTHERM_00043900	GPI10.TTHERM_00043900	GPI10.TTHERM_00043900
HP	TTHERM_00185940	ARL1.TTHERM_00185940	ARL1.TTHERM_00185940
HU	TTHERM_00678470	NA	NA
IR	TTHERM_00219410	KNS1.TTHERM_00219410	KNS1.TTHERM_00219410
MMS	TTHERM_001008629	NA	NA
UV	TTHERM_00059030	NA	NA
CPT_HP_HU_IR_MMS_UV	NA	NA	NA
CPT_HP_HU_IR_MMS	NA	NA	NA
CPT_HP_HU_IR_UV	NA	NA	NA
CPT_HP_HU_MMS_UV	NA	NA	NA
CPT_HP_IR_MMS_UV	TTHERM_01251210	KAR2.TTHERM_01251210	KAR2.TTHERM_01251210
CPT_HU_IR_MMS_UV	NA	NA	NA
HP_HU_IR_MMS_UV	NA	NA	NA
CPT_HP_HU_IR	NA	NA	NA
CPT_HP_HU_MMS	NA	NA	NA
CPT_HP_HU_UV	NA	NA	NA
CPT_HP_IR_MMS	NA	NA	NA
CPT_HP_IR_UV	NA	NA	NA
CPT_HP_MMS_UV	NA	NA	NA
CPT_HU_IR_MMS	NA	NA	NA
CPT_HU_IR_UV	NA	NA	NA
[truncated: 32,845 more rows]

## Sheet: README
Supplemental Table S6. Overlapping dynamic proteins
