# Supplementary material for: A systems view on DNA damage response kinetics in Tetrahymena
Source: HighWire-hosted journal article supplement (doi:10.1101/gr.281000.125), 2026-01-28
Supplement: Supplemental_Table_S7.xlsx [file Supplemental_Table_S7.xlsx]

## Sheet: Supplemental_Table_S7_Proteins
Majority.protein.IDs	Gene.Name	treatment	H0	H1	H2	H3	H4	H6	H8	score	gini	IQR	max	min	big
TTHERM_000001243	NA	CPT	28.6978	28.8901	28.9951	29.0776	29.0972	29.1174	29.1487	log2.LFQ.int	0.0167246	0.164706	29.1487	28.6978	29.1487
TTHERM_000001243	NA	HP	28.8855	28.858	28.5917	28.7543	28.8306	28.9101	28.774	log2.LFQ.int	0.0111422	0.107563	28.9101	28.5917	28.9101
TTHERM_000001243	NA	HU	28.7407	28.7041	28.6963	28.6827	28.6078	28.7337	28.6834	log2.LFQ.int	0.00473854	0.0358483	28.7407	28.6078	28.7407
TTHERM_000001243	NA	IR	28.7626	28.8772	28.8808	28.8006	28.8284	28.6552	28.7411	log2.LFQ.int	0.0101338	0.100946	28.8808	28.6552	28.8808
TTHERM_000001243	NA	MMS	29.0562	28.8594	28.8248	28.7842	29.0131	29.2121	29.025	log2.LFQ.int	0.0174336	0.198516	29.2121	28.7842	29.2121
TTHERM_000001243	NA	NT1	28.5352	28.6196	28.5106	28.6363	28.7119	28.5348	28.5507	log2.LFQ.int	0.00792487	0.0929634	28.7119	28.5106	28.7119
TTHERM_000001243	NA	NT2	28.6071	28.5757	28.6713	28.7173	28.6674	28.6393	28.6279	log2.LFQ.int	0.00428577	0.0518705	28.7173	28.5757	28.7173
TTHERM_000001243	NA	NT3	28.6355	28.7363	28.6855	28.7021	28.684	28.6232	28.6706	log2.LFQ.int	0.00387146	0.0407822	28.7363	28.6232	28.7363
TTHERM_000001243	NA	UV	28.6095	28.7084	28.7893	28.8925	28.8863	28.8092	28.8068	log2.LFQ.int	0.0115878	0.0988846	28.8925	28.6095	28.8925
TTHERM_000005949	TPK2.TTHERM_000005949	CPT	29.8063	29.708	29.7087	29.7277	29.606	29.557	29.5089	log2.LFQ.int	0.0102616	0.136704	29.8063	29.5089	29.8063
TTHERM_000005949	TPK2.TTHERM_000005949	HP	30.1422	30.2121	29.9953	29.9585	30.0668	29.9975	29.8381	log2.LFQ.int	0.0106217	0.127595	30.2121	29.8381	30.2121
TTHERM_000005949	TPK2.TTHERM_000005949	HU	29.8595	29.8231	29.9274	29.8694	29.9075	29.9687	30.0951	log2.LFQ.int	0.00779567	0.0836013	30.0951	29.8231	30.0951
TTHERM_000005949	TPK2.TTHERM_000005949	IR	30.0815	29.8705	29.9146	29.8322	29.8438	29.8492	29.9651	log2.LFQ.int	0.00828305	0.0933826	30.0815	29.8322	30.0815
TTHERM_000005949	TPK2.TTHERM_000005949	MMS	30.1878	30.2566	30.1291	30.3815	30.2236	30.2143	30.2057	log2.LFQ.int	0.00649298	0.0433285	30.3815	30.1291	30.3815
TTHERM_000005949	TPK2.TTHERM_000005949	NT1	30.0225	30.089	30.0977	30.0214	30.03	30.2779	30.306	log2.LFQ.int	0.00954298	0.161571	30.306	30.0214	30.306
TTHERM_000005949	TPK2.TTHERM_000005949	NT2	29.812	29.9539	29.8696	29.9669	30.0374	30.0608	30.063	log2.LFQ.int	0.00714282	0.137318	30.063	29.812	30.063
TTHERM_000005949	TPK2.TTHERM_000005949	NT3	29.8798	29.7167	29.7636	29.8906	29.8201	29.8015	29.9178	log2.LFQ.int	0.00607473	0.102675	29.9178	29.7167	29.9178
TTHERM_000005949	TPK2.TTHERM_000005949	UV	29.7705	29.6742	29.4961	29.476	29.4234	29.535	29.5359	log2.LFQ.int	0.0118568	0.118965	29.7705	29.4234	29.7705
TTHERM_00001080	RAB4A	CPT	26.5127	26.0873	26.5554	26.4514	26.5131	26.8169	26.8928	log2.LFQ.int	0.059104	0.204058	26.8928	26.0873	26.8928
TTHERM_00001080	RAB4A	HP	25.8231	25.9441	25.5413	26.1802	25.9669	26.0316	25.9781	log2.LFQ.int	0.05111	0.121269	26.1802	25.5413	26.1802
TTHERM_00001080	RAB4A	HU	26.0362	26.6535	26.9499	26.575	26.9001	26.502	26.9892	log2.LFQ.int	0.0677779	0.386516	26.9892	26.0362	26.9892
TTHERM_00001080	RAB4A	IR	26.9655	26.7461	27.257	26.397	25.3715	26.8886	27.0097	log2.LFQ.int	0.148076	0.416027	27.257	25.3715	27.257
TTHERM_00001080	RAB4A	MMS	25.9047	26.0109	25.8467	26.3281	26.0312	26.1839	25.8112	log2.LFQ.int	0.0629219	0.231903	26.3281	25.8112	26.3281
TTHERM_00001080	RAB4A	NT1	25.8262	26.0398	25.7558	26.233	25.9181	25.9324	25.8885	log2.LFQ.int	0.0398906	0.128774	26.233	25.7558	26.233
TTHERM_00001080	RAB4A	NT2	26.2178	26.7785	26.6227	26.786	26.3295	27.092	26.9069	log2.LFQ.int	0.0437559	0.370315	27.092	26.2178	27.092
TTHERM_00001080	RAB4A	NT3	26.4214	25.6274	25.8078	26.4826	26.4062	26.3449	26.4412	log2.LFQ.int	0.0595272	0.354974	26.4826	25.6274	26.4826
TTHERM_00001080	RAB4A	UV	25.9701	25.9209	26.3811	26.2609	26.5109	26.4248	26.73	log2.LFQ.int	0.0814007	0.352316	26.73	25.9209	26.73
TTHERM_00001120	NA	CPT	30.9273	30.9543	30.9278	30.714	30.6495	30.5376	30.4633	log2.LFQ.int	0.0161538	0.333995	30.9543	30.4633	30.9543
TTHERM_00001120	NA	HP	30.3488	30.4314	30.5044	30.5189	30.4836	30.4644	30.3874	log2.LFQ.int	0.0050678	0.0845717	30.5189	30.3488	30.5189
TTHERM_00001120	NA	HU	30.8351	30.4534	30.3987	30.4749	30.2973	30.2562	30.2298	log2.LFQ.int	0.0158118	0.18738	30.8351	30.2298	30.8351
TTHERM_00001120	NA	IR	31.0145	30.706	30.5103	30.6658	30.5045	30.4854	30.4701	log2.LFQ.int	0.0154214	0.191001	31.0145	30.4701	31.0145
TTHERM_00001120	NA	MMS	30.4384	30.5403	30.3368	30.4661	30.3086	30.3223	30.321	log2.LFQ.int	0.00761899	0.130578	30.5403	30.3086	30.5403
TTHERM_00001120	NA	NT1	30.5124	30.2721	30.4199	30.3854	30.4066	30.4105	30.4576	log2.LFQ.int	0.00558976	0.0427073	30.5124	30.2721	30.5124
TTHERM_00001120	NA	NT2	30.7662	30.6798	30.6878	30.5561	30.5533	30.4795	30.6881	log2.LFQ.int	0.00674819	0.133308	30.7662	30.4795	30.7662
TTHERM_00001120	NA	NT3	30.8597	30.8041	30.7759	30.7897	30.8634	30.7197	30.8582	log2.LFQ.int	0.00374615	0.0761329	30.8634	30.7197	30.8634
TTHERM_00001120	NA	UV	31.0736	30.8506	30.7071	30.6318	30.4245	30.3019	30.3671	log2.LFQ.int	0.0236571	0.383031	31.0736	30.3019	31.0736
TTHERM_000011369	SRV2.TTHERM_000011369	CPT	28.3155	28.6407	28.852	28.8176	28.878	29.1225	29.2131	log2.LFQ.int	0.0337874	0.27108	29.2131	28.3155	29.2131
TTHERM_000011369	SRV2.TTHERM_000011369	HP	28.8252	28.756	28.927	28.9646	28.8209	28.8537	28.8425	log2.LFQ.int	0.00733234	0.0672985	28.9646	28.756	28.9646
TTHERM_000011369	SRV2.TTHERM_000011369	HU	27.2305	27.7338	27.6375	27.8072	27.4507	27.7793	27.7563	log2.LFQ.int	0.029854	0.223721	27.8072	27.2305	27.8072
TTHERM_000011369	SRV2.TTHERM_000011369	IR	27.8445	27.9079	27.5522	27.9886	27.9897	27.8595	27.6294	log2.LFQ.int	0.0274006	0.211345	27.9897	27.5522	27.9897
TTHERM_000011369	SRV2.TTHERM_000011369	MMS	28.6601	28.5338	28.6139	29.0175	28.8281	28.9793	28.9223	log2.LFQ.int	0.0231863	0.31376	29.0175	28.5338	29.0175
TTHERM_000011369	SRV2.TTHERM_000011369	NT1	28.5499	28.7863	28.5957	28.7302	28.7783	28.682	28.2356	log2.LFQ.int	0.0197888	0.181449	28.7863	28.2356	28.7863
TTHERM_000011369	SRV2.TTHERM_000011369	NT2	27.9679	27.9839	27.7852	27.895	27.8682	27.8452	27.8186	log2.LFQ.int	0.00790036	0.0995161	27.9839	27.7852	27.9839
TTHERM_000011369	SRV2.TTHERM_000011369	NT3	28.2249	28.0364	28.2054	28.4251	28.2622	28.1607	28.2911	log2.LFQ.int	0.0129116	0.0936464	28.4251	28.0364	28.4251
TTHERM_000011369	SRV2.TTHERM_000011369	UV	28.3864	28.6549	28.4348	28.8083	28.5762	28.597	28.4894	log2.LFQ.int	0.0180907	0.163849	28.8083	28.3864	28.8083
TTHERM_000011759	MCM7.TTHERM_000011759	CPT	30.9256	30.745	30.6829	30.8787	30.8919	30.9849	31.0874	log2.LFQ.int	0.0108566	0.143355	31.0874	30.6829	31.0874
TTHERM_000011759	MCM7.TTHERM_000011759	HP	30.9506	31.0301	30.9276	31.1399	31.0908	31.1947	31.1982	log2.LFQ.int	0.0081702	0.176974	31.1982	30.9276	31.1982
TTHERM_000011759	MCM7.TTHERM_000011759	HU	31.1745	30.9944	31.0339	30.9672	30.9505	30.9127	30.8919	log2.LFQ.int	0.00681885	0.0825748	31.1745	30.8919	31.1745
TTHERM_000011759	MCM7.TTHERM_000011759	IR	31.1895	31.2591	31.5986	31.6108	31.434	31.3281	31.1089	log2.LFQ.int	0.015323	0.291994	31.6108	31.1089	31.6108
TTHERM_000011759	MCM7.TTHERM_000011759	MMS	31.1007	30.8811	30.8227	30.8109	30.8002	30.7958	30.8424	log2.LFQ.int	0.00709549	0.0561851	31.1007	30.7958	31.1007
TTHERM_000011759	MCM7.TTHERM_000011759	NT1	30.8245	30.9779	30.8082	30.9315	30.7881	30.6724	30.7046	log2.LFQ.int	0.00841869	0.131598	30.9779	30.6724	30.9779
TTHERM_000011759	MCM7.TTHERM_000011759	NT2	31.1712	31.1108	31.0591	31.153	31.0096	30.8869	30.8526	log2.LFQ.int	0.00807238	0.183631	31.1712	30.8526	31.1712
TTHERM_000011759	MCM7.TTHERM_000011759	NT3	30.8078	30.9535	30.935	30.9668	30.8543	30.7229	30.6736	log2.LFQ.int	0.00820097	0.178864	30.9668	30.6736	30.9668
TTHERM_000011759	MCM7.TTHERM_000011759	UV	30.9269	31.0626	31.0373	31.304	31.3859	31.3924	31.2262	log2.LFQ.int	0.0141858	0.29497	31.3924	30.9269	31.3924
TTHERM_00001200	HXT7.TTHERM_00001200	CPT	25.6754	26.0254	26.049	25.8511	26.3029	26.301	26.4712	log2.LFQ.int	0.0830651	0.363682	26.4712	25.6754	26.4712
TTHERM_00001200	HXT7.TTHERM_00001200	HP	25.9777	26.1027	25.6152	26.1605	26.1851	26.0409	25.9169	log2.LFQ.int	0.0481817	0.184348	26.1851	25.6152	26.1851
TTHERM_00001200	HXT7.TTHERM_00001200	HU	25.4541	25.5855	26.1158	26.2539	25.689	26.0106	25.3962	log2.LFQ.int	0.111274	0.543454	26.2539	25.3962	26.2539
TTHERM_00001200	HXT7.TTHERM_00001200	IR	26.1882	26.2593	26.7995	26.3278	26.1688	26.342	25.9689	log2.LFQ.int	0.0765041	0.156408	26.7995	25.9689	26.7995
TTHERM_00001200	HXT7.TTHERM_00001200	MMS	25.9065	25.8309	25.8743	26.2091	25.8881	26.0847	26.044	log2.LFQ.int	0.0470232	0.183192	26.2091	25.8309	26.2091
TTHERM_00001200	HXT7.TTHERM_00001200	NT1	25.5642	25.834	25.9541	26.5366	26.0176	25.9576	26.2016	log2.LFQ.int	0.0753069	0.215547	26.5366	25.5642	26.5366
TTHERM_00001200	HXT7.TTHERM_00001200	NT2	25.8354	26.1303	26.1816	26.325	26.0117	25.9724	26.2528	log2.LFQ.int	0.0289503	0.225097	26.325	25.8354	26.325
TTHERM_00001200	HXT7.TTHERM_00001200	NT3	26.209	26.075	26.3218	25.8092	26.2002	26.2344	26.8638	log2.LFQ.int	0.0556777	0.140502	26.8638	25.8092	26.8638
TTHERM_00001200	HXT7.TTHERM_00001200	UV	25.2055	26.4441	26.3977	25.895	26.17	25.552	25.5652	log2.LFQ.int	0.173141	0.725311	26.4441	25.2055	26.4441
TTHERM_00001320	PNS1.TTHERM_00001320	CPT	25.1342	25.2102	25.3738	25.8486	25.2407	25.8648	25.6684	log2.LFQ.int	0.140339	0.533073	25.8648	25.1342	25.8648
TTHERM_00001320	PNS1.TTHERM_00001320	HP	25.8322	25.9006	25.8581	26.206	25.9995	25.8899	26.05	log2.LFQ.int	0.0341623	0.150776	26.206	25.8322	26.206
TTHERM_00001320	PNS1.TTHERM_00001320	HU	25.4635	25.449	25.5302	25.9224	25.4592	25.3977	25.4598	log2.LFQ.int	0.0536326	0.0427574	25.9224	25.3977	25.9224
TTHERM_00001320	PNS1.TTHERM_00001320	IR	25.4881	25.3739	25.6084	26.1024	25.5089	25.3322	25.504	log2.LFQ.int	0.133694	0.12766	26.1024	25.3322	26.1024
TTHERM_00001320	PNS1.TTHERM_00001320	MMS	25.7663	25.8266	25.8031	26.4134	25.9448	25.9167	25.8672	log2.LFQ.int	0.0654846	0.11589	26.4134	25.7663	26.4134
TTHERM_00001320	PNS1.TTHERM_00001320	NT1	25.8263	25.7433	25.8529	26.3628	25.8446	26.0537	26.1701	log2.LFQ.int	0.0566902	0.276513	26.3628	25.7433	26.3628
TTHERM_00001320	PNS1.TTHERM_00001320	NT2	25.4703	25.5442	25.6431	25.8597	25.539	25.5937	25.5474	log2.LFQ.int	0.0223968	0.076852	25.8597	25.4703	25.8597
TTHERM_00001320	PNS1.TTHERM_00001320	NT3	25.1839	25.2179	25.2442	25.8515	25.4447	25.288	25.2187	log2.LFQ.int	0.0569114	0.148011	25.8515	25.1839	25.8515
TTHERM_00001320	PNS1.TTHERM_00001320	UV	25.1711	25.3335	25.205	25.9213	25.2354	25.5178	25.2452	log2.LFQ.int	0.134438	0.205458	25.9213	25.1711	25.9213
TTHERM_00001430	NA	CPT	25.1513	25.3529	25.2965	25.7486	25.4088	25.3741	25.4018	log2.LFQ.int	0.0805578	0.0805792	25.7486	25.1513	25.7486
TTHERM_00001430	NA	HP	25.9038	25.9814	25.8293	26.4051	26.0424	26.049	26.2652	log2.LFQ.int	0.0504873	0.214441	26.4051	25.8293	26.4051
TTHERM_00001430	NA	HU	25.4628	25.5568	25.6681	26.0152	25.4549	25.6383	25.3789	log2.LFQ.int	0.0734419	0.194303	26.0152	25.3789	26.0152
TTHERM_00001430	NA	IR	25.4895	25.5288	25.6166	25.9484	25.428	25.3549	25.5553	log2.LFQ.int	0.1061	0.127201	25.9484	25.3549	25.9484
TTHERM_00001430	NA	MMS	25.9911	25.8646	25.8835	26.1117	25.9144	25.8898	26.1233	log2.LFQ.int	0.0368526	0.164762	26.1233	25.8646	26.1233
TTHERM_00001430	NA	NT1	25.8733	25.6263	25.7218	26.2306	25.9566	26.1122	26.0038	log2.LFQ.int	0.0574054	0.260433	26.2306	25.6263	26.2306
TTHERM_00001430	NA	NT2	25.453	25.4762	25.4619	26.0021	25.416	25.6343	25.5081	log2.LFQ.int	0.0344994	0.11376	26.0021	25.416	26.0021
TTHERM_00001430	NA	NT3	25.104	25.2432	25.3472	25.5636	25.2569	25.3232	25.3327	log2.LFQ.int	0.0383117	0.0899654	25.5636	25.104	25.5636
TTHERM_00001430	NA	UV	26.3073	25.3582	25.4585	25.9029	25.3169	25.491	25.3508	log2.LFQ.int	0.152623	0.342412	26.3073	25.3169	26.3073
TTHERM_00001420	SRVW1	CPT	25.1513	25.3529	25.2965	25.7486	25.4088	25.3741	25.4018	log2.LFQ.int	0.0805578	0.0805792	25.7486	25.1513	25.7486
TTHERM_00001420	SRVW1	HP	25.9038	25.9814	25.8293	26.4051	26.0424	26.049	26.2652	log2.LFQ.int	0.0504873	0.214441	26.4051	25.8293	26.4051
TTHERM_00001420	SRVW1	HU	25.4628	25.5568	25.6681	26.0152	25.4549	25.6383	25.3789	log2.LFQ.int	0.0734419	0.194303	26.0152	25.3789	26.0152
TTHERM_00001420	SRVW1	IR	25.4895	25.5288	25.6166	25.9484	25.428	25.3549	25.5553	log2.LFQ.int	0.1061	0.127201	25.9484	25.3549	25.9484
TTHERM_00001420	SRVW1	MMS	25.9911	25.8646	25.8835	26.1117	25.9144	25.8898	26.1233	log2.LFQ.int	0.0368526	0.164762	26.1233	25.8646	26.1233
TTHERM_00001420	SRVW1	NT1	25.8733	25.6263	25.7218	26.2306	25.9566	26.1122	26.0038	log2.LFQ.int	0.0574054	0.260433	26.2306	25.6263	26.2306
TTHERM_00001420	SRVW1	NT2	25.453	25.4762	25.4619	26.0021	25.416	25.6343	25.5081	log2.LFQ.int	0.0344994	0.11376	26.0021	25.416	26.0021
TTHERM_00001420	SRVW1	NT3	25.104	25.2432	25.3472	25.5636	25.2569	25.3232	25.3327	log2.LFQ.int	0.0383117	0.0899654	25.5636	25.104	25.5636
TTHERM_00001420	SRVW1	UV	26.3073	25.3582	25.4585	25.9029	25.3169	25.491	25.3508	log2.LFQ.int	0.152623	0.342412	26.3073	25.3169	26.3073
TTHERM_000014929	NA	CPT	29.1055	29.1741	29.5247	29.5584	29.7041	29.823	30.0048	log2.LFQ.int	0.0326928	0.414143	30.0048	29.1055	30.0048
TTHERM_000014929	NA	HP	28.3535	28.5495	28.6087	28.6813	27.6699	28.4311	28.8177	log2.LFQ.int	0.0395634	0.252695	28.8177	27.6699	28.8177
TTHERM_000014929	NA	HU	29.0182	29.0089	28.9979	28.967	29.2055	29.0384	29.175	log2.LFQ.int	0.00923712	0.103316	29.2055	28.967	29.2055
TTHERM_000014929	NA	IR	29.0187	29.0769	29.2077	28.9392	28.8653	28.8623	28.8438	log2.LFQ.int	0.0160112	0.184	29.2077	28.8438	29.2077
TTHERM_000014929	NA	MMS	28.2039	28.5087	27.8671	27.4319	28.4376	28.8758	28.7143	log2.LFQ.int	0.0680038	0.576034	28.8758	27.4319	28.8758
TTHERM_000014929	NA	NT1	28.5653	28.0326	28.3765	27.5965	28.2907	28.4022	28.0662	log2.LFQ.int	0.0384899	0.339904	28.5653	27.5965	28.5653
TTHERM_000014929	NA	NT2	28.8846	28.9122	28.9831	29.033	28.9233	28.8851	28.9194	log2.LFQ.int	0.0044862	0.0546001	29.033	28.8846	29.033
TTHERM_000014929	NA	NT3	28.9703	28.9015	28.9135	28.9961	28.8272	28.7986	28.865	log2.LFQ.int	0.00706424	0.095838	28.9961	28.7986	28.9961
TTHERM_000014929	NA	UV	28.8983	29.1069	29.2084	29.2143	28.9693	29.0679	29.0867	log2.LFQ.int	0.0129839	0.139048	29.2143	28.8983	29.2143
TTHERM_000024129	IFA38.TTHERM_000024129	CPT	30.956	31.0125	31.0834	31.0816	31.1281	31.0545	31.0201	log2.LFQ.int	0.00438007	0.0661563	31.1281	30.956	31.1281
TTHERM_000024129	IFA38.TTHERM_000024129	HP	31.7693	31.7133	31.7318	31.7385	31.8234	31.9381	31.8835	log2.LFQ.int	0.00558483	0.118293	31.9381	31.7133	31.9381
TTHERM_000024129	IFA38.TTHERM_000024129	HU	30.9726	31.1977	31.1703	31.2573	31.2669	31.1441	31.2249	log2.LFQ.int	0.00681065	0.083922	31.2669	30.9726	31.2669
TTHERM_000024129	IFA38.TTHERM_000024129	IR	30.9066	30.8691	30.984	30.9711	31.0852	31.2252	31.3807	log2.LFQ.int	0.014682	0.216372	31.3807	30.8691	31.3807
TTHERM_000024129	IFA38.TTHERM_000024129	MMS	31.7519	31.7926	31.8424	32.0944	32.155	32.1268	32.0473	log2.LFQ.int	0.0116171	0.293018	32.155	31.7519	32.155
TTHERM_000024129	IFA38.TTHERM_000024129	NT1	31.5709	31.6668	31.7641	31.8349	31.9588	31.9466	31.8845	log2.LFQ.int	0.00963757	0.20009	31.9588	31.5709	31.9588
TTHERM_000024129	IFA38.TTHERM_000024129	NT2	30.9596	31.1055	31.1294	31.1674	31.1825	31.1639	31.2959	log2.LFQ.int	0.00601935	0.0575125	31.2959	30.9596	31.2959
TTHERM_000024129	IFA38.TTHERM_000024129	NT3	30.957	30.9329	31.0195	31.2042	31.1038	31.1288	31.1812	log2.LFQ.int	0.00742836	0.16674	31.2042	30.9329	31.2042
TTHERM_000024129	IFA38.TTHERM_000024129	UV	30.8557	30.8547	30.8908	30.9121	31.1022	31.2581	31.2346	log2.LFQ.int	0.0135945	0.295125	31.2581	30.8547	31.2581
TTHERM_00002660	LIH1.TTHERM_00002660	CPT	25.2627	25.3346	25.2937	25.7663	26.2114	26.4963	26.2392	log2.LFQ.int	0.181274	0.911127	26.4963	25.2627	26.4963
TTHERM_00002660	LIH1.TTHERM_00002660	HP	25.9527	25.9515	25.6963	26.1956	25.9197	26.108	26.0666	log2.LFQ.int	0.0416064	0.151708	26.1956	25.6963	26.1956
TTHERM_00002660	LIH1.TTHERM_00002660	HU	25.4352	25.5647	25.7167	26.0798	25.6129	25.4465	25.4422	log2.LFQ.int	0.0765308	0.220457	26.0798	25.4352	26.0798
TTHERM_00002660	LIH1.TTHERM_00002660	IR	25.4967	25.7206	25.5441	25.9508	25.2587	25.4982	25.5682	log2.LFQ.int	0.121414	0.146944	25.9508	25.2587	25.9508
TTHERM_00002660	LIH1.TTHERM_00002660	MMS	25.7402	25.8161	25.8345	26.393	25.8791	26.1186	26.029	log2.LFQ.int	0.0759779	0.248517	26.393	25.7402	26.393
TTHERM_00002660	LIH1.TTHERM_00002660	NT1	25.8624	25.9555	25.989	26.4706	25.9937	25.945	26.0952	log2.LFQ.int	0.0430871	0.094186	26.4706	25.8624	26.4706
TTHERM_00002660	LIH1.TTHERM_00002660	NT2	25.5693	25.3817	25.5587	25.8805	25.4033	25.5534	25.5281	log2.LFQ.int	0.0297179	0.0982974	25.8805	25.3817	25.8805
TTHERM_00002660	LIH1.TTHERM_00002660	NT3	25.2968	25.3151	25.3821	25.6682	25.3631	25.4074	25.4671	log2.LFQ.int	0.031824	0.0981989	25.6682	25.2968	25.6682
TTHERM_00002660	LIH1.TTHERM_00002660	UV	25.3179	25.2562	25.477	25.737	25.2676	25.4566	25.5794	log2.LFQ.int	0.0937078	0.235403	25.737	25.2562	25.737
TTHERM_000028549	RNR1.TTHERM_000028549	CPT	32.6025	32.5922	32.8336	33.2184	33.3846	33.4941	33.5857	log2.LFQ.int	0.02477	0.721326	33.5857	32.5922	33.5857
TTHERM_000028549	RNR1.TTHERM_000028549	HP	32.767	32.7108	32.6434	32.7446	32.5702	32.7113	32.8286	log2.LFQ.int	0.00496836	0.0787062	32.8286	32.5702	32.8286
TTHERM_000028549	RNR1.TTHERM_000028549	HU	32.7454	32.5173	32.464	32.5129	32.4579	32.4996	32.4311	log2.LFQ.int	0.00544856	0.0540941	32.7454	32.4311	32.7454
TTHERM_000028549	RNR1.TTHERM_000028549	IR	32.799	32.9125	33.0243	33.1617	33.058	32.9351	32.7297	log2.LFQ.int	0.00953741	0.185411	33.1617	32.7297	33.1617
TTHERM_000028549	RNR1.TTHERM_000028549	MMS	32.7632	32.5088	32.5366	32.4967	32.4602	32.591	32.6432	log2.LFQ.int	0.00648755	0.114355	32.7632	32.4602	32.7632
TTHERM_000028549	RNR1.TTHERM_000028549	NT1	32.6603	32.5968	32.5797	32.6331	32.4937	32.33	32.1918	log2.LFQ.int	0.0101505	0.203073	32.6603	32.1918	32.6603
TTHERM_000028549	RNR1.TTHERM_000028549	NT2	32.7737	32.773	32.7096	32.6519	32.5548	32.4547	32.3137	log2.LFQ.int	0.00922835	0.23653	32.7737	32.3137	32.7737
TTHERM_000028549	RNR1.TTHERM_000028549	NT3	32.5601	32.5615	32.5749	32.527	32.4661	32.3661	32.2569	log2.LFQ.int	0.00657265	0.144687	32.5749	32.2569	32.5749
TTHERM_000028549	RNR1.TTHERM_000028549	UV	32.6356	33.1763	33.4188	33.5374	33.5613	33.5375	33.3479	log2.LFQ.int	0.0170259	0.275367	33.5613	32.6356	33.5613
TTHERM_000028908	NA	CPT	27.5797	27.4059	27.2268	27.1768	27.1756	26.9194	26.8552	log2.LFQ.int	0.045841	0.268844	27.5797	26.8552	27.5797
TTHERM_000028908	NA	HP	27.1574	27.8474	27.7295	27.8854	27.794	27.8848	27.9541	log2.LFQ.int	0.0306581	0.123296	27.9541	27.1574	27.9541
TTHERM_000028908	NA	HU	27.4985	27.3158	27.3072	27.2752	27.3327	27.1569	27.3446	log2.LFQ.int	0.0155657	0.0474555	27.4985	27.1569	27.4985
TTHERM_000028908	NA	IR	27.3623	27.2981	27.3938	27.4918	27.3908	27.3041	27.3251	log2.LFQ.int	0.0126714	0.077727	27.4918	27.2981	27.4918
TTHERM_000028908	NA	MMS	27.8004	27.4929	27.4211	27.374	27.4135	27.1663	27.4144	log2.LFQ.int	0.0297259	0.0632765	27.8004	27.1663	27.8004
TTHERM_000028908	NA	NT1	27.2111	27.7581	27.6892	26.9527	27.6425	27.4567	26.959	log2.LFQ.int	0.0519258	0.580752	27.7581	26.9527	27.7581
TTHERM_000028908	NA	NT2	27.5226	27.3867	27.3969	27.6358	27.3249	27.3702	27.3634	log2.LFQ.int	0.011776	0.0929488	27.6358	27.3249	27.6358
TTHERM_000028908	NA	NT3	27.3324	27.2393	27.3251	27.4982	27.4282	27.4297	27.3419	log2.LFQ.int	0.0115231	0.100269	27.4982	27.2393	27.4982
TTHERM_000028908	NA	UV	27.2997	27.1945	26.8414	27.2026	27.0818	27.1597	27.3508	log2.LFQ.int	0.0304598	0.130375	27.3508	26.8414	27.3508
TTHERM_000030229	NA	CPT	25.6577	26.329	26.5187	26.2094	26.4306	26.7063	26.9517	log2.LFQ.int	0.100542	0.343324	26.9517	25.6577	26.9517
TTHERM_000030229	NA	HP	26.0263	26.1788	25.6896	26.1016	25.7723	26.0023	25.9219	log2.LFQ.int	0.0473374	0.216827	26.1788	25.6896	26.1788
TTHERM_000030229	NA	HU	26.0073	25.4302	26.2508	26.152	25.8285	26.0946	26.2821	log2.LFQ.int	0.0801459	0.283498	26.2821	25.4302	26.2821
TTHERM_000030229	NA	IR	26.1866	26.278	26.4592	26.4806	26.361	26.1307	25.9528	log2.LFQ.int	0.0632095	0.251443	26.4806	25.9528	26.4806
TTHERM_000030229	NA	MMS	25.9557	25.9535	25.7612	26.3	25.9987	26.0756	26.229	log2.LFQ.int	0.0603111	0.197661	26.3	25.7612	26.3
TTHERM_000030229	NA	NT1	25.7494	26.0663	25.9828	26.4477	25.9323	26.0579	25.9721	log2.LFQ.int	0.0491254	0.109891	26.4477	25.7494	26.4477
TTHERM_000030229	NA	NT2	26.4339	26.2832	25.4587	26.0483	26.0046	26.1524	26.1024	log2.LFQ.int	0.0477082	0.191362	26.4339	25.4587	26.4339
TTHERM_000030229	NA	NT3	25.3093	25.1747	25.2604	25.6859	25.3749	25.234	25.3101	log2.LFQ.int	0.0423681	0.0953213	25.6859	25.1747	25.6859
TTHERM_000030229	NA	UV	26.0008	26.0945	26.5346	25.8476	26.2501	25.7342	25.4023	log2.LFQ.int	0.126548	0.381345	26.5346	25.4023	26.5346
TTHERM_000030359	NA	CPT	29.1151	29.2284	29.1372	29.2247	28.881	28.7509	28.7993	log2.LFQ.int	0.0221685	0.340751	29.2284	28.7509	29.2284
TTHERM_000030359	NA	HP	29.5222	29.6036	29.325	29.6139	29.3444	29.5456	29.5093	log2.LFQ.int	0.0106207	0.14772	29.6139	29.325	29.6139
TTHERM_000030359	NA	HU	28.9489	29.0585	28.7862	29.0011	28.6498	28.4732	28.4421	log2.LFQ.int	0.0286495	0.41349	29.0585	28.4421	29.0585
TTHERM_000030359	NA	IR	28.6469	28.8663	28.7557	28.9671	29.1151	29.2002	28.8732	log2.LFQ.int	0.0240201	0.230085	29.2002	28.6469	29.2002
TTHERM_000030359	NA	MMS	28.6092	29.683	29.118	28.6397	29.5706	28.6178	28.9171	log2.LFQ.int	0.0504935	0.715516	29.683	28.6092	29.683
TTHERM_000030359	NA	NT1	29.381	29.2731	29.4946	27.8988	29.3382	29.5693	29.1394	log2.LFQ.int	0.0461053	0.231555	29.5693	27.8988	29.5693
TTHERM_000030359	NA	NT2	29.3129	29.1079	29.1326	29.2814	29.1671	29.1435	29.1935	log2.LFQ.int	0.00634567	0.0994069	29.3129	29.1079	29.3129
TTHERM_000030359	NA	NT3	29.0208	28.1982	29.1191	27.4552	29.097	29.2236	29.1892	log2.LFQ.int	0.0577602	0.544614	29.2236	27.4552	29.2236
TTHERM_000030359	NA	UV	29.0537	29.1694	28.9214	28.4483	29.3725	29.311	29.5652	log2.LFQ.int	0.0396083	0.354188	29.5652	28.4483	29.5652
TTHERM_000032869	YOL075C.TTHERM_000032869	CPT	27.1533	27.1206	26.655	26.559	26.8888	26.4993	26.5592	log2.LFQ.int	0.057301	0.445619	27.1533	26.4993	27.1533
TTHERM_000032869	YOL075C.TTHERM_000032869	HP	28.542	28.0909	28.2907	27.985	28.5429	27.6027	27.7381	log2.LFQ.int	0.0473525	0.55481	28.5429	27.6027	28.5429
TTHERM_000032869	YOL075C.TTHERM_000032869	HU	27.0263	27.2276	27.3209	27.4145	27.4972	27.5627	27.4843	log2.LFQ.int	0.0298539	0.216494	27.5627	27.0263	27.5627
TTHERM_000032869	YOL075C.TTHERM_000032869	IR	26.4035	26.2452	26.2434	25.9748	26.5709	27.8935	28.9142	log2.LFQ.int	0.232199	0.987899	28.9142	25.9748	28.9142
TTHERM_000032869	YOL075C.TTHERM_000032869	MMS	28.7692	28.5168	28.2548	27.3139	26.857	26.0719	26.749	log2.LFQ.int	0.176429	1.58281	28.7692	26.0719	28.7692
TTHERM_000032869	YOL075C.TTHERM_000032869	NT1	28.7115	28.4119	28.3664	28.5248	28.5032	28.3032	27.736	log2.LFQ.int	0.0327531	0.179203	28.7115	27.736	28.7115
TTHERM_000032869	YOL075C.TTHERM_000032869	NT2	27.0228	27.4155	27.2714	27.7362	27.6587	28.2818	28.2861	log2.LFQ.int	0.0536225	0.665494	28.2861	27.0228	28.2861
TTHERM_000032869	YOL075C.TTHERM_000032869	NT3	27.287	27.0471	27.2128	27.5437	27.5942	27.8098	27.8549	log2.LFQ.int	0.0406558	0.452095	27.8549	27.0471	27.8549
TTHERM_000032869	YOL075C.TTHERM_000032869	UV	27.2623	27.2461	27.2647	27.4427	27.395	27.5785	27.8152	log2.LFQ.int	0.0347561	0.247103	27.8152	27.2461	27.8152
TTHERM_000043960	YJR149W.TTHERM_000043960	CPT	26.7582	25.7933	25.3193	25.8191	25.3333	25.2222	25.3378	log2.LFQ.int	0.188957	0.479965	26.7582	25.2222	26.7582
TTHERM_000043960	YJR149W.TTHERM_000043960	HP	25.9968	26.4716	25.6157	26.3325	25.933	26.6263	26.7575	log2.LFQ.int	0.0974217	0.58401	26.7575	25.6157	26.7575
TTHERM_000043960	YJR149W.TTHERM_000043960	HU	26.8185	27.1592	27.2007	27.3967	27.6561	27.422	27.8185	log2.LFQ.int	0.054585	0.359103	27.8185	26.8185	27.8185
TTHERM_000043960	YJR149W.TTHERM_000043960	IR	25.6488	25.9188	25.3939	26.0723	25.3013	26.5452	26.9515	log2.LFQ.int	0.24649	0.787358	26.9515	25.3013	26.9515
TTHERM_000043960	YJR149W.TTHERM_000043960	MMS	27.0906	26.6291	27.1187	27.2721	27.6817	27.8184	27.7745	log2.LFQ.int	0.0787686	0.623491	27.8184	26.6291	27.8184
TTHERM_000043960	YJR149W.TTHERM_000043960	NT1	26.9983	26.6626	27.2063	27.0383	27.3157	27.4594	27.3609	log2.LFQ.int	0.0439146	0.319959	27.4594	26.6626	27.4594
TTHERM_000043960	YJR149W.TTHERM_000043960	NT2	26.9029	26.9449	27.0546	26.711	27.1051	27.144	27.4094	log2.LFQ.int	0.0276704	0.200701	27.4094	26.711	27.4094
TTHERM_000043960	YJR149W.TTHERM_000043960	NT3	26.9056	26.925	26.78	26.8122	26.7803	27.1158	27.1846	log2.LFQ.int	0.0240486	0.224119	27.1846	26.78	27.1846
TTHERM_000043960	YJR149W.TTHERM_000043960	UV	27.5936	26.3106	26.4507	26.6943	27.1298	27.2984	27.2626	log2.LFQ.int	0.100191	0.708003	27.5936	26.3106	27.5936
TTHERM_000046129	YIP5.TTHERM_000046129	CPT	26.8865	26.9157	26.9024	26.6165	27.0717	26.9806	27.1569	log2.LFQ.int	0.032634	0.131737	27.1569	26.6165	27.1569
TTHERM_000046129	YIP5.TTHERM_000046129	HP	26.6581	25.8579	27.1395	27.0378	25.9843	26.0918	26.787	log2.LFQ.int	0.109608	0.87437	27.1395	25.8579	27.1395
TTHERM_000046129	YIP5.TTHERM_000046129	HU	26.738	26.9625	27.3467	27.2605	27.34	26.7834	27.5137	log2.LFQ.int	0.0533015	0.470388	27.5137	26.738	27.5137
TTHERM_000046129	YIP5.TTHERM_000046129	IR	26.6895	26.9881	27.1848	25.9935	26.8178	26.7235	26.4032	log2.LFQ.int	0.100385	0.356622	27.1848	25.9935	27.1848
TTHERM_000046129	YIP5.TTHERM_000046129	MMS	26.9775	27.1692	25.7926	26.3301	26.7172	26.8421	25.8751	log2.LFQ.int	0.137134	0.807174	27.1692	25.7926	27.1692
TTHERM_000046129	YIP5.TTHERM_000046129	NT1	26.6275	25.7882	25.7267	26.5534	26.0632	26.9494	26.724	log2.LFQ.int	0.105914	0.750035	26.9494	25.7267	26.9494
TTHERM_000046129	YIP5.TTHERM_000046129	NT2	26.8542	27.2643	27.2672	27.4308	26.7587	27.3835	27.341	log2.LFQ.int	0.0307363	0.30297	27.4308	26.7587	27.4308
TTHERM_000046129	YIP5.TTHERM_000046129	NT3	25.9988	25.8641	26.6421	26.9487	26.954	27.0841	27.1147	log2.LFQ.int	0.0815679	0.698529	27.1147	25.8641	27.1147
TTHERM_000046129	YIP5.TTHERM_000046129	UV	26.4185	26.805	26.8941	27.0405	26.6805	27.0347	27.2139	log2.LFQ.int	0.056805	0.294867	27.2139	26.4185	27.2139
TTHERM_000046378	APL5.TTHERM_000046378	CPT	27.7305	27.6635	27.5642	27.7151	27.6996	27.3962	27.4138	log2.LFQ.int	0.0218399	0.218318	27.7305	27.3962	27.7305
TTHERM_000046378	APL5.TTHERM_000046378	HP	26.8111	27.164	27.138	27.4324	27.5068	27.7363	27.7507	log2.LFQ.int	0.0534175	0.470547	27.7507	26.8111	27.7507
TTHERM_000046378	APL5.TTHERM_000046378	HU	27.0804	27.3744	27.3513	27.6257	27.5661	27.6265	27.5923	log2.LFQ.int	0.0301269	0.24615	27.6265	27.0804	27.6265
TTHERM_000046378	APL5.TTHERM_000046378	IR	27.8503	27.7864	27.6456	27.2505	27.2999	27.4929	27.6654	log2.LFQ.int	0.041948	0.329459	27.8503	27.2505	27.8503
TTHERM_000046378	APL5.TTHERM_000046378	MMS	27.4496	27.7072	27.5512	26.3062	27.1136	27.1873	27.0096	log2.LFQ.int	0.0850563	0.438789	27.7072	26.3062	27.7072
TTHERM_000046378	APL5.TTHERM_000046378	NT1	27.6228	27.6112	27.8977	27.3318	27.8603	28.0398	28.234	log2.LFQ.int	0.0411836	0.35177	28.234	27.3318	28.234
TTHERM_000046378	APL5.TTHERM_000046378	NT2	27.2085	27.2805	27.4275	27.4226	27.6629	27.673	27.6966	log2.LFQ.int	0.0226771	0.316404	27.6966	27.2085	27.6966
TTHERM_000046378	APL5.TTHERM_000046378	NT3	27.56	27.3972	27.4796	27.7762	27.5096	27.7362	27.7809	log2.LFQ.int	0.0197812	0.261646	27.7809	27.3972	27.7809
TTHERM_000046378	APL5.TTHERM_000046378	UV	27.5993	27.6544	27.6955	27.6482	27.6316	27.7678	27.6937	log2.LFQ.int	0.00866642	0.0546854	27.7678	27.5993	27.7678
TTHERM_000046389	PHO23.TTHERM_000046389	CPT	26.3834	26.8227	26.9571	27.1554	27.067	26.961	27.1742	log2.LFQ.int	0.0496527	0.221294	27.1742	26.3834	27.1742
TTHERM_000046389	PHO23.TTHERM_000046389	HP	25.9377	25.8706	25.9959	26.1608	25.8674	26.1106	26.1088	log2.LFQ.int	0.0316527	0.205538	26.1608	25.8674	26.1608
TTHERM_000046389	PHO23.TTHERM_000046389	HU	26.5153	26.5373	26.5267	25.8852	26.478	26.42	26.449	log2.LFQ.int	0.0414758	0.0864871	26.5373	25.8852	26.5373
TTHERM_000046389	PHO23.TTHERM_000046389	IR	26.7091	26.5865	26.2217	26.3308	26.3863	26.3542	26.1491	log2.LFQ.int	0.0596709	0.210225	26.7091	26.1491	26.7091
TTHERM_000046389	PHO23.TTHERM_000046389	MMS	25.9578	25.8488	25.8679	26.3022	25.7403	25.8762	25.9639	log2.LFQ.int	0.0566422	0.102468	26.3022	25.7403	26.3022
TTHERM_000046389	PHO23.TTHERM_000046389	NT1	25.8476	25.8509	26.052	26.5697	25.9606	26.1022	25.9597	log2.LFQ.int	0.0548769	0.171797	26.5697	25.8476	26.5697
TTHERM_000046389	PHO23.TTHERM_000046389	NT2	26.6623	26.4724	26.4604	26.3349	26.3162	26.4056	26.3044	log2.LFQ.int	0.018031	0.140862	26.6623	26.3044	26.6623
TTHERM_000046389	PHO23.TTHERM_000046389	NT3	26.2296	26.3689	26.391	26.3646	26.247	26.3842	26.2008	log2.LFQ.int	0.014743	0.13827	26.391	26.2008	26.391
TTHERM_000046389	PHO23.TTHERM_000046389	UV	26.6722	26.5813	26.4943	26.2485	26.4502	26.2375	26.0938	log2.LFQ.int	0.0566063	0.294817	26.6722	26.0938	26.6722
TTHERM_000047249	NA	CPT	25.2802	25.4268	25.1494	25.7972	25.3491	25.1446	25.4206	log2.LFQ.int	0.105865	0.208833	25.7972	25.1446	25.7972
TTHERM_000047249	NA	HP	25.8888	25.9756	25.5938	26.3713	26.0096	25.9449	25.869	log2.LFQ.int	0.0574742	0.113663	26.3713	25.5938	26.3713
TTHERM_000047249	NA	HU	26.2551	26.3526	26.4685	26.5119	25.9746	25.5892	25.98	log2.LFQ.int	0.0859471	0.433264	26.5119	25.5892	26.5119
TTHERM_000047249	NA	IR	25.8568	26.2024	26.262	26.5392	26.452	26.364	26.3194	log2.LFQ.int	0.0684073	0.175838	26.5392	25.8568	26.5392
TTHERM_000047249	NA	MMS	25.9607	25.6784	25.7859	26.3718	25.9228	25.9305	26.1357	log2.LFQ.int	0.0778078	0.19381	26.3718	25.6784	26.3718
TTHERM_000047249	NA	NT1	25.8969	25.9075	25.7373	26.5144	25.9475	25.9488	25.8843	log2.LFQ.int	0.0517257	0.0575246	26.5144	25.7373	26.5144
TTHERM_000047249	NA	NT2	26.1468	26.3176	26.5705	26.4223	26.5363	26.3252	26.3399	log2.LFQ.int	0.0218095	0.157951	26.5705	26.1468	26.5705
TTHERM_000047249	NA	NT3	25.2056	25.3957	25.3022	25.9075	25.3601	25.2784	25.2294	log2.LFQ.int	0.0557752	0.124039	25.9075	25.2056	25.9075
TTHERM_000047249	NA	UV	25.1118	25.0566	25.5074	25.6852	25.4125	25.3937	25.3947	log2.LFQ.int	0.123165	0.207197	25.6852	25.0566	25.6852
TTHERM_00004830	SSF2.TTHERM_00004830	CPT	28.4926	28.6262	28.8509	29.0801	29.0237	29.1555	29.3697	log2.LFQ.int	0.0347868	0.379273	29.3697	28.4926	29.3697
TTHERM_00004830	SSF2.TTHERM_00004830	HP	27.8963	28.4574	28.6494	28.9562	28.879	29.0207	28.8581	log2.LFQ.int	0.0404603	0.3642	29.0207	27.8963	29.0207
TTHERM_00004830	SSF2.TTHERM_00004830	HU	28.4537	28.5066	28.4434	27.823	28.3797	28.1737	28.3453	log2.LFQ.int	0.0269503	0.189065	28.5066	27.823	28.5066
TTHERM_00004830	SSF2.TTHERM_00004830	IR	28.7239	28.9108	29.1373	29.1919	29.0357	28.4693	28.1212	log2.LFQ.int	0.048453	0.489869	29.1919	28.1212	29.1919
TTHERM_00004830	SSF2.TTHERM_00004830	MMS	28.6663	28.5532	28.5523	28.3207	28.6474	28.774	28.8201	log2.LFQ.int	0.0203168	0.167396	28.8201	28.3207	28.8201
TTHERM_00004830	SSF2.TTHERM_00004830	NT1	28.7483	28.1937	28.0074	28.0361	28.4476	27.8792	27.6974	log2.LFQ.int	0.0440338	0.37737	28.7483	27.6974	28.7483
TTHERM_00004830	SSF2.TTHERM_00004830	NT2	28.4845	28.5498	28.6693	28.4518	28.2438	28.23	27.7154	log2.LFQ.int	0.0286296	0.280193	28.6693	27.7154	28.6693
TTHERM_00004830	SSF2.TTHERM_00004830	NT3	28.4078	28.3932	28.4052	28.4657	28.1763	28.0125	27.9914	log2.LFQ.int	0.0210933	0.312084	28.4657	27.9914	28.4657
TTHERM_00004830	SSF2.TTHERM_00004830	UV	28.3755	28.61	28.5863	28.8326	28.7305	28.5203	28.368	log2.LFQ.int	0.0218244	0.222383	28.8326	28.368	28.8326
TTHERM_000050608	TMA46.TTHERM_000050608	CPT	31.0042	31.0384	31.0081	30.9529	30.7774	30.4371	29.9937	log2.LFQ.int	0.0287142	0.398824	31.0384	29.9937	31.0384
TTHERM_000050608	TMA46.TTHERM_000050608	HP	30.4984	30.5561	30.4301	30.6238	30.6188	30.6032	30.6648	log2.LFQ.int	0.00635445	0.0940532	30.6648	30.4301	30.6648
TTHERM_000050608	TMA46.TTHERM_000050608	HU	31.4239	31.0786	30.9844	30.8862	30.895	30.6102	30.5669	log2.LFQ.int	0.0219033	0.283294	31.4239	30.5669	31.4239
TTHERM_000050608	TMA46.TTHERM_000050608	IR	31.2365	31.2647	31.2972	31.4121	31.2812	31.3044	31.049	log2.LFQ.int	0.00782571	0.0502025	31.4121	31.049	31.4121
TTHERM_000050608	TMA46.TTHERM_000050608	MMS	30.5897	30.5693	30.6243	30.6251	30.7383	30.6152	30.6776	log2.LFQ.int	0.00460177	0.0489313	30.7383	30.5693	30.7383
TTHERM_000050608	TMA46.TTHERM_000050608	NT1	30.6909	30.6219	30.5823	30.4473	30.5472	30.4295	30.4083	log2.LFQ.int	0.00853773	0.163664	30.6909	30.4083	30.6909
TTHERM_000050608	TMA46.TTHERM_000050608	NT2	31.2869	31.0836	31.0823	31.0771	30.9618	30.773	30.9273	log2.LFQ.int	0.0100411	0.13839	31.2869	30.773	31.2869
TTHERM_000050608	TMA46.TTHERM_000050608	NT3	31.1265	31.0604	31.046	31.0442	30.9928	30.9878	30.8776	log2.LFQ.int	0.00515652	0.0628677	31.1265	30.8776	31.1265
TTHERM_000050608	TMA46.TTHERM_000050608	UV	31.1108	31.1446	31.1994	31.2279	31.2046	31.1325	31.0995	log2.LFQ.int	0.00390353	0.0803368	31.2279	31.0995	31.2279
TTHERM_000051979	NA	CPT	26.8026	26.859	27.2465	26.6315	25.1866	27.1597	26.4293	log2.LFQ.int	0.141322	0.478941	27.2465	25.1866	27.2465
TTHERM_000051979	NA	HP	25.7436	25.8769	25.5461	26.4332	25.8613	25.8271	26.0195	log2.LFQ.int	0.0712744	0.162813	26.4332	25.5461	26.4332
TTHERM_000051979	NA	HU	25.4716	25.5013	27.4714	25.9935	27.4023	28.0794	27.3761	log2.LFQ.int	0.210397	1.68948	28.0794	25.4716	28.0794
TTHERM_000051979	NA	IR	27.3527	26.9457	28.315	26.0414	28.608	28.6231	27.7269	log2.LFQ.int	0.166241	1.3123	28.6231	26.0414	28.6231
TTHERM_000051979	NA	MMS	27.2735	28.8076	27.5232	26.3581	25.8397	25.9123	25.8901	log2.LFQ.int	0.239155	1.49719	28.8076	25.8397	28.8076
TTHERM_000051979	NA	NT1	28.5302	25.8903	26.0459	26.4163	25.9755	25.9192	27.919	log2.LFQ.int	0.188546	1.22025	28.5302	25.8903	28.5302
TTHERM_000051979	NA	NT2	25.5277	26.7851	25.5237	25.9765	25.4937	25.3039	25.3646	log2.LFQ.int	0.0858598	0.3229	26.7851	25.3039	26.7851
TTHERM_000051979	NA	NT3	25.1694	25.3908	25.3256	25.7321	25.2884	25.2638	25.2882	log2.LFQ.int	0.0445703	0.0821807	25.7321	25.1694	25.7321
TTHERM_000051979	NA	UV	27.9763	27.2602	27.419	25.8268	27.0326	25.4774	25.2972	log2.LFQ.int	0.25468	1.68755	27.9763	25.2972	27.9763
TTHERM_000052539	NA	CPT	30.5246	30.4825	30.333	30.2992	30.3427	30.2614	30.3293	log2.LFQ.int	0.00792762	0.098413	30.5246	30.2614	30.5246
TTHERM_000052539	NA	HP	30.5028	30.5765	30.4174	30.3995	30.5099	30.4853	30.3738	log2.LFQ.int	0.005799	0.0978427	30.5765	30.3738	30.5765
TTHERM_000052539	NA	HU	30.6797	30.5666	30.5355	30.4656	30.5648	30.4848	30.5365	log2.LFQ.int	0.00537332	0.0555778	30.6797	30.4656	30.6797
TTHERM_000052539	NA	IR	30.4952	30.3779	30.4396	30.6257	30.7042	30.763	30.7546	log2.LFQ.int	0.0138198	0.261923	30.763	30.3779	30.763
TTHERM_000052539	NA	MMS	30.4864	30.4115	30.3928	30.3517	30.2961	30.1316	30.0595	log2.LFQ.int	0.0136012	0.188261	30.4864	30.0595	30.4864
TTHERM_000052539	NA	NT1	30.5488	30.4616	30.4657	30.4433	30.4922	30.4853	30.4448	log2.LFQ.int	0.00273897	0.0355564	30.5488	30.4433	30.5488
TTHERM_000052539	NA	NT2	30.6044	30.576	30.5811	30.6155	30.5872	30.5199	30.5758	log2.LFQ.int	0.00191239	0.0198683	30.6155	30.5199	30.6155
TTHERM_000052539	NA	NT3	30.456	30.4257	30.3807	30.4275	30.3748	30.3379	30.3768	log2.LFQ.int	0.00302607	0.0507872	30.456	30.3379	30.456
TTHERM_000052539	NA	UV	30.4448	30.3187	30.4142	30.5363	30.6542	30.761	30.803	log2.LFQ.int	0.0157933	0.278145	30.803	30.3187	30.803
TTHERM_000058649	NA	CPT	25.3386	25.3665	25.0847	25.7473	25.2927	25.1446	25.3963	log2.LFQ.int	0.105267	0.162757	25.7473	25.0847	25.7473
TTHERM_000058649	NA	HP	25.9388	25.9481	25.9354	26.0872	25.8661	26.1233	26.0255	log2.LFQ.int	0.0242325	0.119202	26.1233	25.8661	26.1233
TTHERM_000058649	NA	HU	25.755	25.6549	25.9319	26.0288	25.7876	25.8401	25.3699	log2.LFQ.int	0.0681811	0.181008	26.0288	25.3699	26.0288
TTHERM_000058649	NA	IR	25.5765	25.4417	25.5684	26.0095	25.5895	25.3943	25.6459	log2.LFQ.int	0.103308	0.112658	26.0095	25.3943	26.0095
TTHERM_000058649	NA	MMS	26.047	26.1614	26.0844	26.2273	26.1052	25.8884	25.9303	log2.LFQ.int	0.0399125	0.144663	26.2273	25.8884	26.2273
TTHERM_000058649	NA	NT1	25.935	25.8265	26.0085	26.3881	25.8979	25.9515	25.8248	log2.LFQ.int	0.0434295	0.11779	26.3881	25.8248	26.3881
TTHERM_000058649	NA	NT2	25.5609	25.3762	25.445	26.0063	25.8497	25.5364	25.7543	log2.LFQ.int	0.0449996	0.311295	26.0063	25.3762	26.0063
TTHERM_000058649	NA	NT3	25.2195	25.1576	25.2899	25.7281	25.2573	25.2103	25.2741	log2.LFQ.int	0.0444802	0.0671094	25.7281	25.1576	25.7281
TTHERM_000058649	NA	UV	25.1204	25.2518	25.3458	25.8038	25.4468	25.4805	25.4644	log2.LFQ.int	0.113579	0.17359	25.8038	25.1204	25.8038
TTHERM_000058769	NA	CPT	29.374	29.2388	29.4071	29.5222	29.4516	29.6309	29.6572	log2.LFQ.int	0.0150064	0.186016	29.6572	29.2388	29.6572
TTHERM_000058769	NA	HP	30.1332	30.1414	30.1842	30.5169	30.5586	30.5433	30.3204	log2.LFQ.int	0.0156053	0.367265	30.5586	30.1332	30.5586
TTHERM_000058769	NA	HU	29.0988	29.3394	29.4446	29.675	29.6694	29.4678	29.7696	log2.LFQ.int	0.0224254	0.280192	29.7696	29.0988	29.7696
TTHERM_000058769	NA	IR	28.9167	28.9848	29.2083	29.1313	29.17	29.424	29.4064	log2.LFQ.int	0.0222875	0.249301	29.424	28.9167	29.424
TTHERM_000058769	NA	MMS	30.0383	30.2081	30.3222	30.4097	30.2385	30.3387	30.3999	log2.LFQ.int	0.0112686	0.145957	30.4097	30.0383	30.4097
TTHERM_000058769	NA	NT1	29.9593	30.1598	30.2813	30.3196	30.2781	30.2317	30.207	log2.LFQ.int	0.00916888	0.096348	30.3196	29.9593	30.3196
TTHERM_000058769	NA	NT2	29.1273	29.3095	29.2884	29.3947	29.4461	29.5261	29.7664	log2.LFQ.int	0.0161109	0.187156	29.7664	29.1273	29.7664
TTHERM_000058769	NA	NT3	29.2565	29.2258	29.1745	29.5386	29.619	29.6828	29.5132	log2.LFQ.int	0.0179656	0.337633	29.6828	29.1745	29.6828
TTHERM_000058769	NA	UV	29.1297	29.4212	29.3381	29.6535	29.9169	29.9195	30.3064	log2.LFQ.int	0.0407537	0.538555	30.3064	29.1297	30.3064
TTHERM_000058799	NA	CPT	26.4587	26.5685	26.4724	25.7111	26.1462	25.6093	25.7208	log2.LFQ.int	0.119557	0.749618	26.5685	25.6093	26.5685
TTHERM_000058799	NA	HP	25.9229	26.3374	26.8753	26.4666	26.6813	27.0924	26.8474	log2.LFQ.int	0.0788395	0.45936	27.0924	25.9229	27.0924
TTHERM_000058799	NA	HU	26.4808	26.32	26.5391	26.5995	26.4711	26.59	26.8043	log2.LFQ.int	0.0316958	0.118824	26.8043	26.32	26.8043
TTHERM_000058799	NA	IR	26.2638	26.2163	26.6118	26.3327	26.4824	26.525	26.3792	log2.LFQ.int	0.0447062	0.205451	26.6118	26.2163	26.6118
TTHERM_000058799	NA	MMS	26.9013	26.299	26.24	26.4013	25.923	25.9452	26.1415	log2.LFQ.int	0.0921826	0.306816	26.9013	25.923	26.9013
TTHERM_000058799	NA	NT1	26.1388	26.4289	25.8763	26.3574	26.538	26.4952	26.6449	log2.LFQ.int	0.0560916	0.268464	26.6449	25.8763	26.6449
TTHERM_000058799	NA	NT2	26.3499	26.7483	26.5411	26.1556	26.476	26.5603	26.6068	log2.LFQ.int	0.0277849	0.170592	26.7483	26.1556	26.7483
TTHERM_000058799	NA	NT3	26.5732	26.4039	26.4247	26.6997	26.5449	26.4849	26.4171	log2.LFQ.int	0.018146	0.13816	26.6997	26.4039	26.6997
TTHERM_000058799	NA	UV	26.6173	26.6468	26.4536	26.0048	26.1653	25.9889	26.1869	log2.LFQ.int	0.0781017	0.450395	26.6468	25.9889	26.6468
TTHERM_000059119	NA	CPT	27.1269	26.8699	26.7096	26.7141	26.6277	26.497	26.5347	log2.LFQ.int	0.0453564	0.210816	27.1269	26.497	27.1269
TTHERM_000059119	NA	HP	27.375	26.9727	27.1923	27.1711	27.7179	27.7279	27.2086	log2.LFQ.int	0.0437403	0.364736	27.7279	26.9727	27.7279
TTHERM_000059119	NA	HU	27.5518	27.2888	27.2705	27.1903	27.2668	27.16	26.9994	log2.LFQ.int	0.0267337	0.10455	27.5518	26.9994	27.5518
TTHERM_000059119	NA	IR	27.2318	27.2389	27.5548	27.5827	27.6939	27.629	27.7551	log2.LFQ.int	0.0369478	0.264596	27.7551	27.2318	27.7551
TTHERM_000059119	NA	MMS	27.6514	27.025	26.9031	27.1595	27.3508	26.8875	26.8383	log2.LFQ.int	0.0563203	0.3598	27.6514	26.8383	27.6514
TTHERM_000059119	NA	NT1	27.176	27.0983	27.6454	27.2373	27.1171	27.6757	26.8676	log2.LFQ.int	0.0454987	0.333659	27.6757	26.8676	27.6757
TTHERM_000059119	NA	NT2	27.5319	27.4735	27.5759	27.6606	27.5832	27.5064	27.5623	log2.LFQ.int	0.00679759	0.0604196	27.6606	27.4735	27.6606
TTHERM_000059119	NA	NT3	26.9506	26.9734	27.0404	26.7009	26.7645	26.7925	26.9114	log2.LFQ.int	0.0194976	0.183521	27.0404	26.7009	27.0404
TTHERM_000059119	NA	UV	26.9107	26.8649	26.9192	26.9822	26.9833	27.1634	27.2719	log2.LFQ.int	0.0287607	0.158417	27.2719	26.8649	27.2719
TTHERM_00006010	NA	CPT	28.937	29.2494	29.0296	29.0443	29.1393	29.1088	29.1532	log2.LFQ.int	0.0109921	0.109291	29.2494	28.937	29.2494
TTHERM_00006010	NA	HP	29.167	29.1315	29.2778	29.2813	29.2207	29.1114	29.2597	log2.LFQ.int	0.00705723	0.119433	29.2813	29.1114	29.2813
TTHERM_00006010	NA	HU	29.0038	29.0002	28.9109	29.1046	29.1476	29.0917	29.1884	log2.LFQ.int	0.0103084	0.124074	29.1884	28.9109	29.1884
TTHERM_00006010	NA	IR	29.1631	29.0221	28.8952	29.019	28.9355	29.0341	29.1045	log2.LFQ.int	0.0109287	0.0920273	29.1631	28.8952	29.1631
TTHERM_00006010	NA	MMS	29.0055	29.3768	29.4453	29.267	29.2297	29.5127	29.2993	log2.LFQ.int	0.0174881	0.162672	29.5127	29.0055	29.5127
TTHERM_00006010	NA	NT1	29.2876	29.0451	28.9927	28.9526	29.0964	29.2515	29.0924	log2.LFQ.int	0.0125778	0.155044	29.2876	28.9526	29.2876
TTHERM_00006010	NA	NT2	28.9949	28.8903	29.0552	29.0595	28.8985	29.0362	29.1308	log2.LFQ.int	0.00749896	0.110639	29.1308	28.8903	29.1308
TTHERM_00006010	NA	NT3	29.1563	29.1231	29.0354	29.0791	29.0099	28.828	29.0481	log2.LFQ.int	0.00931029	0.0784492	29.1563	28.828	29.1563
TTHERM_00006010	NA	UV	29.1648	29.143	29.1012	29.0795	29.0862	29.0647	29.134	log2.LFQ.int	0.00418242	0.0557102	29.1648	29.0647	29.1648
TTHERM_00006030	NA	CPT	25.1897	25.3318	25.4595	25.7756	25.4218	25.3219	25.2129	log2.LFQ.int	0.0919499	0.173231	25.7756	25.1897	25.7756
TTHERM_00006030	NA	HP	25.9084	26.0274	25.7801	26.3193	26.0813	26.0205	25.7987	log2.LFQ.int	0.0479775	0.200751	26.3193	25.7801	26.3193
TTHERM_00006030	NA	HU	25.2884	25.6475	25.4604	26.1845	25.3705	25.4211	25.5337	log2.LFQ.int	0.100916	0.194815	26.1845	25.2884	26.1845
TTHERM_00006030	NA	IR	25.3924	25.7129	26.3503	26.1738	26.2748	25.597	25.7246	log2.LFQ.int	0.161597	0.569344	26.3503	25.3924	26.3503
TTHERM_00006030	NA	MMS	25.9199	25.8263	26.1794	26.3294	25.805	26.0998	26.077	log2.LFQ.int	0.0650819	0.266536	26.3294	25.805	26.3294
TTHERM_00006030	NA	NT1	25.8019	26.0981	26.0103	26.5044	26.0417	26.0459	25.9424	log2.LFQ.int	0.0484378	0.0956712	26.5044	25.8019	26.5044
TTHERM_00006030	NA	NT2	25.5811	25.6013	25.4693	26.0595	25.5944	25.3764	25.6538	log2.LFQ.int	0.0380052	0.102368	26.0595	25.3764	26.0595
TTHERM_00006030	NA	NT3	25.1875	25.3006	25.3025	25.854	25.2715	25.4844	25.13	log2.LFQ.int	0.062621	0.163906	25.854	25.13	25.854
TTHERM_00006030	NA	UV	25.1444	25.1649	25.2352	25.8176	25.3597	25.3413	25.5695	log2.LFQ.int	0.133432	0.264576	25.8176	25.1444	25.8176
TTHERM_00006060	PARP7	CPT	27.3636	27.7793	28.061	28.4086	29.0439	29.7539	30.3638	log2.LFQ.int	0.131093	1.47872	30.3638	27.3636	30.3638
TTHERM_00006060	PARP7	HP	26.9614	26.7799	26.9239	27.2843	26.8901	26.9589	27.1384	log2.LFQ.int	0.0282445	0.142896	27.2843	26.7799	27.2843
TTHERM_00006060	PARP7	HU	26.922	27.371	27.6618	27.9491	27.9524	28.082	28.1168	log2.LFQ.int	0.0614043	0.500785	28.1168	26.922	28.1168
TTHERM_00006060	PARP7	IR	27.4377	27.301	27.4076	26.513	26.7972	26.9338	27.2777	log2.LFQ.int	0.0744732	0.488787	27.4377	26.513	27.4377
TTHERM_00006060	PARP7	MMS	26.2192	27.1678	27.6667	28.042	28.0587	28.315	28.2323	log2.LFQ.int	0.113045	0.728263	28.315	26.2192	28.315
TTHERM_00006060	PARP7	NT1	26.4926	26.3626	26.4588	26.3882	26.6802	27.3937	27.4204	log2.LFQ.int	0.0803234	0.61344	27.4204	26.3626	27.4204
TTHERM_00006060	PARP7	NT2	26.9781	27.205	27.0454	27.1594	27.3929	27.5325	27.6918	log2.LFQ.int	0.0318912	0.360304	27.6918	26.9781	27.6918
TTHERM_00006060	PARP7	NT3	27.142	27.1126	27.0202	26.9533	27.2527	27.2573	27.4798	log2.LFQ.int	0.024631	0.188583	27.4798	26.9533	27.4798
TTHERM_00006060	PARP7	UV	27.3317	27.7199	28.0999	27.9711	27.865	27.9996	28.0519	log2.LFQ.int	0.0373624	0.23332	28.0999	27.3317	28.0999
TTHERM_00006070	PARP8	CPT	27.7803	27.9327	28.3787	28.8165	29.1112	29.914	30.0111	log2.LFQ.int	0.103169	1.35694	30.0111	27.7803	30.0111
TTHERM_00006070	PARP8	HP	27.082	27.3636	27.1561	27.0429	26.066	27.1768	27.6816	log2.LFQ.int	0.0747475	0.207716	27.6816	26.066	27.6816
TTHERM_00006070	PARP8	HU	27.6323	27.9351	27.8418	27.9962	28.1986	28.5384	28.4893	log2.LFQ.int	0.0448862	0.455539	28.5384	27.6323	28.5384
TTHERM_00006070	PARP8	IR	27.8056	28.0246	27.8715	26.6991	27.6827	27.9454	27.7132	log2.LFQ.int	0.0639856	0.210481	28.0246	26.6991	28.0246
TTHERM_00006070	PARP8	MMS	27.5611	27.3752	27.6858	27.2745	27.7844	28.2485	28.2264	log2.LFQ.int	0.0609693	0.537263	28.2485	27.2745	28.2485
TTHERM_00006070	PARP8	NT1	27.0121	27.2958	26.743	26.4088	27.2891	27.3111	27.0741	log2.LFQ.int	0.0551975	0.414884	27.3111	26.4088	27.3111
TTHERM_00006070	PARP8	NT2	27.5888	27.4281	27.5985	27.2192	27.4314	27.5039	27.4436	log2.LFQ.int	0.0140239	0.116584	27.5985	27.2192	27.5985
TTHERM_00006070	PARP8	NT3	27.9753	27.761	27.8639	27.3014	27.7733	27.9802	28.1534	log2.LFQ.int	0.0304027	0.210593	28.1534	27.3014	28.1534
TTHERM_00006070	PARP8	UV	28.0493	28.1621	28.5648	28.4016	28.2345	28.4521	28.5517	log2.LFQ.int	0.0268066	0.303584	28.5648	28.0493	28.5648
TTHERM_00006090	NA	CPT	30.1203	30.1431	30.0394	29.9925	29.9134	29.797	29.7509	log2.LFQ.int	0.0141528	0.224641	30.1431	29.7509	30.1431
TTHERM_00006090	NA	HP	29.7939	29.9232	29.8822	30.004	29.9652	29.8429	29.8782	log2.LFQ.int	0.00640318	0.0836844	30.004	29.7939	30.004
TTHERM_00006090	NA	HU	30.306	30.1753	30.1628	30.2076	30.1627	30.2315	30.2637	log2.LFQ.int	0.00466763	0.0785318	30.306	30.1627	30.306
TTHERM_00006090	NA	IR	30.3289	30.0861	29.8986	29.9854	29.8993	30.0782	30.221	log2.LFQ.int	0.0154782	0.211157	30.3289	29.8986	30.3289
TTHERM_00006090	NA	MMS	29.6614	29.8281	29.7228	29.7785	29.8297	29.7452	29.5147	log2.LFQ.int	0.0104034	0.111249	29.8297	29.5147	29.8297
TTHERM_00006090	NA	NT1	29.9373	29.7647	29.7659	29.8275	29.7822	29.9128	29.6877	log2.LFQ.int	0.00776836	0.104895	29.9373	29.6877	29.9373
TTHERM_00006090	NA	NT2	30.2751	30.1585	30.235	30.2099	30.1873	30.3168	30.3517	log2.LFQ.int	0.00509125	0.0973548	30.3517	30.1585	30.3517
TTHERM_00006090	NA	NT3	30.0763	30.0953	30.1247	30.1378	30.0166	30.0999	30.204	log2.LFQ.int	0.0044379	0.0454042	30.204	30.0166	30.204
TTHERM_00006090	NA	UV	30.1106	30.0137	29.8772	29.829	29.7595	29.5556	29.7638	log2.LFQ.int	0.0173768	0.183797	30.1106	29.5556	30.1106
TTHERM_00006110	NA	CPT	26.1565	26.2055	26.1631	25.9142	25.8525	25.6692	25.7578	log2.LFQ.int	0.0688008	0.354647	26.2055	25.6692	26.2055
TTHERM_00006110	NA	HP	25.7885	25.9676	25.7982	26.2086	26.0591	25.8277	26.1561	log2.LFQ.int	0.0464514	0.294648	26.2086	25.7885	26.2086
TTHERM_00006110	NA	HU	25.9842	25.3977	25.8015	26.003	25.5208	25.4497	25.916	log2.LFQ.int	0.0878668	0.464823	26.003	25.3977	26.003
TTHERM_00006110	NA	IR	26.0096	25.8018	25.7694	26.0097	25.7245	25.7823	25.8425	log2.LFQ.int	0.0498217	0.150161	26.0097	25.7245	26.0097
TTHERM_00006110	NA	MMS	25.9948	25.9277	25.8071	26.2625	26.0512	25.8874	25.8358	log2.LFQ.int	0.0526931	0.161405	26.2625	25.8071	26.2625
TTHERM_00006110	NA	NT1	25.9214	25.9573	25.9394	26.502	25.9127	26.0287	26.1108	log2.LFQ.int	0.0443425	0.139304	26.502	25.9127	26.502
TTHERM_00006110	NA	NT2	25.7557	25.9303	25.8952	25.9964	25.8472	26.0391	25.865	log2.LFQ.int	0.0170666	0.10731	26.0391	25.7557	26.0391
TTHERM_00006110	NA	NT3	25.8781	25.8624	25.8772	25.9409	25.7881	25.7955	25.9817	log2.LFQ.int	0.0155021	0.0805442	25.9817	25.7881	25.9817
TTHERM_00006110	NA	UV	26.1194	25.9553	25.7125	25.8462	25.5749	25.5373	25.4364	log2.LFQ.int	0.101615	0.344645	26.1194	25.4364	26.1194
TTHERM_00006120	NA	CPT	32.1461	32.1771	32.2394	32.3675	32.3074	32.2538	32.2957	log2.LFQ.int	0.00506117	0.0932874	32.3675	32.1461	32.3675
TTHERM_00006120	NA	HP	32.1897	31.9456	32.0488	32.2921	32.2856	32.3102	32.3335	log2.LFQ.int	0.00893884	0.181901	32.3335	31.9456	32.3335
TTHERM_00006120	NA	HU	32.1945	32.3715	32.3043	32.3729	32.3655	32.329	32.333	log2.LFQ.int	0.00354829	0.0518298	32.3729	32.1945	32.3729
TTHERM_00006120	NA	IR	32.3318	32.4119	32.4677	32.4379	32.5958	32.3829	32.3012	log2.LFQ.int	0.00640659	0.0955117	32.5958	32.3012	32.5958
TTHERM_00006120	NA	MMS	32.1694	31.9654	32.0394	32.2041	32.3069	32.4563	32.4312	log2.LFQ.int	0.0126327	0.264654	32.4563	31.9654	32.4563
TTHERM_00006120	NA	NT1	31.9957	32.2566	32.003	32.2148	31.9777	32.0873	32.0285	log2.LFQ.int	0.00686228	0.15172	32.2566	31.9777	32.2566
TTHERM_00006120	NA	NT2	32.1845	32.2984	32.2408	32.2283	32.2121	32.1268	32.0949	log2.LFQ.int	0.00391501	0.0789016	32.2984	32.0949	32.2984
TTHERM_00006120	NA	NT3	32.0447	32.0737	32.0321	32.1566	31.9125	31.7236	31.7389	log2.LFQ.int	0.0101873	0.23345	32.1566	31.7236	32.1566
TTHERM_00006120	NA	UV	32.0084	32.0058	31.9084	31.8419	31.7669	31.6326	31.5617	log2.LFQ.int	0.0123808	0.25737	32.0084	31.5617	32.0084
TTHERM_00006140	NA	CPT	26.8165	26.7434	26.5576	26.7315	26.4857	26.6098	26.299	log2.LFQ.int	0.0404517	0.215831	26.8165	26.299	26.8165
TTHERM_00006140	NA	HP	27.0742	27.0882	26.9095	26.8391	26.9049	27.083	26.9769	log2.LFQ.int	0.0175515	0.171347	27.0882	26.8391	27.0882
TTHERM_00006140	NA	HU	27.0227	27.1117	27.081	26.8493	26.951	27.0767	27.0378	log2.LFQ.int	0.0159548	0.0920013	27.1117	26.8493	27.1117
TTHERM_00006140	NA	IR	26.5731	26.8867	26.9976	27.2437	27.3005	27.1457	27.1665	log2.LFQ.int	0.0534609	0.26289	27.3005	26.5731	27.3005
TTHERM_00006140	NA	MMS	26.6	26.1027	26.7364	26.4628	25.8226	25.949	26.104	log2.LFQ.int	0.101968	0.505536	26.7364	25.8226	26.7364
TTHERM_00006140	NA	NT1	27.1101	27.0543	27.3035	27.3784	26.9089	27.0812	26.7933	log2.LFQ.int	0.0342978	0.225216	27.3784	26.7933	27.3784
TTHERM_00006140	NA	NT2	27.1762	27.185	27.2155	27.2612	27.1597	27.2298	26.9833	log2.LFQ.int	0.00991107	0.0547105	27.2612	26.9833	27.2612
TTHERM_00006140	NA	NT3	27.2323	27.2025	27.2402	27.3459	27.3146	27.3546	27.4149	log2.LFQ.int	0.0107143	0.114028	27.4149	27.2025	27.4149
TTHERM_00006140	NA	UV	27.2102	27.1394	27.1667	27.1644	27.4506	27.4806	27.5529	log2.LFQ.int	0.0310344	0.300048	27.5529	27.1394	27.5529
TTHERM_00006150	OXP1.TTHERM_00006150	CPT	28.6372	28.5115	28.4958	28.1906	28.3609	28.3943	28.3492	log2.LFQ.int	0.0180175	0.14855	28.6372	28.1906	28.6372
TTHERM_00006150	OXP1.TTHERM_00006150	HP	28.3447	28.4725	28.3326	28.4783	27.8132	27.9969	28.386	log2.LFQ.int	0.0289632	0.264549	28.4783	27.8132	28.4783
TTHERM_00006150	OXP1.TTHERM_00006150	HU	28.8253	29.2941	29.495	29.4783	29.5237	29.454	29.3432	log2.LFQ.int	0.0208877	0.168001	29.5237	28.8253	29.5237
TTHERM_00006150	OXP1.TTHERM_00006150	IR	28.3536	28.4787	28.5316	28.7446	28.9212	29.0189	29.2114	log2.LFQ.int	0.0407821	0.464903	29.2114	28.3536	29.2114
TTHERM_00006150	OXP1.TTHERM_00006150	MMS	28.7329	29.0784	29.0669	28.8951	29.0217	29.1407	29.0329	log2.LFQ.int	0.0148192	0.114302	29.1407	28.7329	29.1407
TTHERM_00006150	OXP1.TTHERM_00006150	NT1	28.5911	28.3682	28.7051	28.4684	28.9447	28.9074	28.6791	log2.LFQ.int	0.0237822	0.276479	28.9447	28.3682	28.9447
TTHERM_00006150	OXP1.TTHERM_00006150	NT2	28.5998	28.7885	28.8356	28.9396	28.9042	29.149	29.2044	log2.LFQ.int	0.0182036	0.232291	29.2044	28.5998	29.2044
TTHERM_00006150	OXP1.TTHERM_00006150	NT3	28.6421	28.618	28.6387	28.9646	29.0298	28.9619	29.022	log2.LFQ.int	0.0178974	0.352861	29.0298	28.618	29.0298
TTHERM_00006150	OXP1.TTHERM_00006150	UV	28.7084	28.571	28.9273	29.0926	29.2416	29.3649	29.4269	log2.LFQ.int	0.0374281	0.485379	29.4269	28.571	29.4269
TTHERM_00006180	NA	CPT	25.1515	25.3621	25.053	25.8028	25.2932	25.1699	25.243	log2.LFQ.int	0.119721	0.166901	25.8028	25.053	25.8028
TTHERM_00006180	NA	HP	25.8846	25.9292	26.3451	26.3984	25.9711	25.9835	26.0389	log2.LFQ.int	0.0486968	0.241825	26.3984	25.8846	26.3984
TTHERM_00006180	NA	HU	25.4029	25.4764	25.4667	26.0554	25.409	25.5389	25.4397	log2.LFQ.int	0.0686445	0.0833111	26.0554	25.4029	26.0554
TTHERM_00006180	NA	IR	25.6056	25.7089	25.5534	25.8929	25.8312	25.5662	25.4483	log2.LFQ.int	0.0870137	0.21028	25.8929	25.4483	25.8929
TTHERM_00006180	NA	MMS	26.0449	25.9354	26.029	26.5143	25.8499	25.8989	25.9865	log2.LFQ.int	0.0628205	0.119789	26.5143	25.8499	26.5143
TTHERM_00006180	NA	NT1	25.9426	26.0115	25.8131	26.3421	26.1038	26.0875	26.045	log2.LFQ.int	0.0394513	0.118627	26.3421	25.8131	26.3421
TTHERM_00006180	NA	NT2	25.4411	25.3977	25.4593	25.9316	25.3573	25.4604	25.4381	log2.LFQ.int	0.0305522	0.0419301	25.9316	25.3573	25.9316
TTHERM_00006180	NA	NT3	25.2738	25.2751	25.2324	25.7826	25.351	25.3536	25.1761	log2.LFQ.int	0.0482265	0.099262	25.7826	25.1761	25.7826
TTHERM_00006180	NA	UV	25.3054	25.2249	25.3604	25.7136	25.4679	25.4039	25.2203	log2.LFQ.int	0.0923284	0.17076	25.7136	25.2203	25.7136
TTHERM_00006190	NA	CPT	27.3359	27.3105	27.4428	27.3248	27.5265	27.4169	27.4457	log2.LFQ.int	0.0133113	0.11393	27.5265	27.3105	27.5265
TTHERM_00006190	NA	HP	26.8877	26.5023	26.2969	27.0074	27.4193	27.5052	27.242	log2.LFQ.int	0.0805035	0.635598	27.5052	26.2969	27.5052
TTHERM_00006190	NA	HU	27.1272	26.9553	27.2002	27.4433	27.0765	27.0971	27.2569	log2.LFQ.int	0.0265475	0.141778	27.4433	26.9553	27.4433
TTHERM_00006190	NA	IR	27.2524	27.1873	27.3026	27.3752	27.192	27.1034	27.072	log2.LFQ.int	0.0223513	0.132103	27.3752	27.072	27.3752
TTHERM_00006190	NA	MMS	27.0575	27.4923	27.4085	27.1354	27.2682	27.42	27.4611	log2.LFQ.int	0.0304092	0.23877	27.4923	27.0575	27.4923
TTHERM_00006190	NA	NT1	27.4384	27.2429	27.4355	27.5635	27.2532	27.2828	27.3256	log2.LFQ.int	0.0179956	0.168967	27.5635	27.2429	27.5635
TTHERM_00006190	NA	NT2	27.1103	27.1209	27.0659	26.867	27.0465	26.8911	26.9386	log2.LFQ.int	0.0135253	0.173245	27.1209	26.867	27.1209
TTHERM_00006190	NA	NT3	27.1712	27.3591	27.3384	27.3186	27.2417	27.1248	27.0203	log2.LFQ.int	0.017615	0.180549	27.3591	27.0203	27.3591
TTHERM_00006190	NA	UV	27.3419	27.5686	27.6294	27.6726	27.624	27.5771	27.3847	log2.LFQ.int	0.0204331	0.150066	27.6726	27.3419	27.6726
TTHERM_00006200	NA	CPT	25.2376	25.2927	25.2919	25.7903	25.4282	25.7374	25.8964	log2.LFQ.int	0.118129	0.471523	25.8964	25.2376	25.8964
TTHERM_00006200	NA	HP	26.0099	25.9191	25.6609	26.2891	26.0091	25.881	26.2963	log2.LFQ.int	0.0580872	0.24948	26.2963	25.6609	26.2963
TTHERM_00006200	NA	HU	25.5386	25.6649	25.5079	26.0819	25.8664	25.82	25.7861	log2.LFQ.int	0.0666376	0.241388	26.0819	25.5079	26.0819
TTHERM_00006200	NA	IR	25.5241	25.4176	25.478	25.9787	25.3684	25.4209	25.5035	log2.LFQ.int	0.105513	0.0945224	25.9787	25.3684	25.9787
TTHERM_00006200	NA	MMS	25.8823	26.1233	25.9403	26.3217	25.7727	25.9613	25.9582	log2.LFQ.int	0.0583873	0.130979	26.3217	25.7727	26.3217
TTHERM_00006200	NA	NT1	25.932	25.9393	25.7909	26.4133	26.1396	26.2193	26.0305	log2.LFQ.int	0.0520624	0.243762	26.4133	25.7909	26.4133
TTHERM_00006200	NA	NT2	25.4792	25.3165	25.4513	25.9357	25.4254	25.59	25.7989	log2.LFQ.int	0.0435614	0.256115	25.9357	25.3165	25.9357
TTHERM_00006200	NA	NT3	25.3784	25.1769	25.4439	25.8469	25.3332	25.2316	25.3508	log2.LFQ.int	0.0545388	0.128742	25.8469	25.1769	25.8469
TTHERM_00006200	NA	UV	25.3741	25.3148	25.3361	25.7488	25.5847	25.3893	25.3301	log2.LFQ.int	0.0786878	0.153878	25.7488	25.3148	25.7488
TTHERM_00006210	NA	CPT	28.59	28.4063	28.3973	28.4741	28.5105	28.3309	28.1631	log2.LFQ.int	0.0172323	0.128194	28.59	28.1631	28.59
TTHERM_00006210	NA	HP	28.3138	27.4842	28.3057	28.2737	28.3041	28.3275	27.8575	log2.LFQ.int	0.0346674	0.244155	28.3275	27.4842	28.3275
TTHERM_00006210	NA	HU	27.915	27.6425	27.8742	27.3629	27.7705	27.5035	27.8177	log2.LFQ.int	0.0300326	0.272987	27.915	27.3629	27.915
TTHERM_00006210	NA	IR	27.9768	27.7463	27.5245	27.8731	27.7518	27.4508	27.9854	log2.LFQ.int	0.0352249	0.289568	27.9854	27.4508	27.9854
TTHERM_00006210	NA	MMS	28.2717	28.1162	28.0036	28.036	27.4946	27.7071	27.6073	log2.LFQ.int	0.044158	0.418936	28.2717	27.4946	28.2717
TTHERM_00006210	NA	NT1	28.1242	28.2629	28.4067	27.688	28.0619	27.7386	27.826	log2.LFQ.int	0.0355629	0.411211	28.4067	27.688	28.4067
TTHERM_00006210	NA	NT2	27.8584	27.9146	27.8166	28.0069	27.8705	27.7638	28.0656	log2.LFQ.int	0.0111829	0.123255	28.0656	27.7638	28.0656
TTHERM_00006210	NA	NT3	28.4915	28.2932	28.4477	28.4448	28.3869	28.3737	28.1895	log2.LFQ.int	0.0108533	0.112747	28.4915	28.1895	28.4915
TTHERM_00006210	NA	UV	28.3324	28.3945	28.2871	28.3313	28.1066	28.2255	28.1283	log2.LFQ.int	0.0148545	0.154993	28.3945	28.1066	28.3945
TTHERM_00006220	YOP1.TTHERM_00006220	CPT	30.4997	30.5256	30.7049	30.7456	30.621	30.7397	30.8515	log2.LFQ.int	0.010417	0.16938	30.8515	30.4997	30.8515
TTHERM_00006220	YOP1.TTHERM_00006220	HP	29.9622	29.9076	30.1115	29.9884	29.7982	29.8622	30.1005	log2.LFQ.int	0.0103079	0.159527	30.1115	29.7982	30.1115
TTHERM_00006220	YOP1.TTHERM_00006220	HU	30.2963	30.3686	30.5029	30.5238	30.4362	30.3348	30.5288	log2.LFQ.int	0.00792868	0.161651	30.5288	30.2963	30.5288
TTHERM_00006220	YOP1.TTHERM_00006220	IR	30.7227	30.6797	30.31	30.2654	30.3145	30.3117	30.3034	log2.LFQ.int	0.0152164	0.190357	30.7227	30.2654	30.7227
TTHERM_00006220	YOP1.TTHERM_00006220	MMS	29.8648	30.1491	30.08	29.8874	29.8481	29.6215	29.5268	log2.LFQ.int	0.0214881	0.248903	30.1491	29.5268	30.1491
TTHERM_00006220	YOP1.TTHERM_00006220	NT1	30.0965	30.161	30.2138	30.1927	30.1904	30.2874	30.3709	log2.LFQ.int	0.00721415	0.0749355	30.3709	30.0965	30.3709
TTHERM_00006220	YOP1.TTHERM_00006220	NT2	30.1697	30.3169	30.3053	30.4638	30.4674	30.6003	30.6298	log2.LFQ.int	0.0116638	0.222749	30.6298	30.1697	30.6298
TTHERM_00006220	YOP1.TTHERM_00006220	NT3	30.5502	30.6816	30.6649	30.9329	30.9733	31.1276	30.9311	log2.LFQ.int	0.0145415	0.279861	31.1276	30.5502	31.1276
TTHERM_00006220	YOP1.TTHERM_00006220	UV	30.8847	30.8164	30.866	30.7294	30.6572	30.6488	30.6121	log2.LFQ.int	0.00918471	0.188247	30.8847	30.6121	30.8847
TTHERM_00006230	DGA1.TTHERM_00006230	CPT	25.9777	26.0149	25.8104	25.8692	26.085	26.181	26.1273	log2.LFQ.int	0.0425357	0.182761	26.181	25.8104	26.181
TTHERM_00006230	DGA1.TTHERM_00006230	HP	26.0883	26.5113	26.1372	26.5094	26.2554	26.3848	26.3224	log2.LFQ.int	0.0383157	0.250805	26.5113	26.0883	26.5113
TTHERM_00006230	DGA1.TTHERM_00006230	HU	26.5998	26.1319	26.2292	26.2875	25.9815	26.2225	25.9546	log2.LFQ.int	0.0539761	0.201639	26.5998	25.9546	26.5998
TTHERM_00006230	DGA1.TTHERM_00006230	IR	25.8321	26.5351	26.2504	26.4099	26.3491	26.3261	26.2846	log2.LFQ.int	0.0644274	0.112025	26.5351	25.8321	26.5351
TTHERM_00006230	DGA1.TTHERM_00006230	MMS	25.7692	26.1063	26.0395	26.3474	26.0513	26.0936	26.2746	log2.LFQ.int	0.0574242	0.145021	26.3474	25.7692	26.3474
TTHERM_00006230	DGA1.TTHERM_00006230	NT1	26.0013	26.3477	26.3181	26.4017	26.491	26.4597	26.4803	log2.LFQ.int	0.0329323	0.137137	26.491	26.0013	26.491
TTHERM_00006230	DGA1.TTHERM_00006230	NT2	26.0872	26.2456	26.2268	26.0926	26.3502	26.3857	26.5513	log2.LFQ.int	0.026182	0.208237	26.5513	26.0872	26.5513
TTHERM_00006230	DGA1.TTHERM_00006230	NT3	26.2411	26.1399	26.2828	26.2148	26.3609	26.1108	25.2318	log2.LFQ.int	0.061476	0.136551	26.3609	25.2318	26.3609
TTHERM_00006230	DGA1.TTHERM_00006230	UV	25.7794	26.0946	25.997	25.8662	26.402	26.5002	26.3799	log2.LFQ.int	0.0882422	0.45938	26.5002	25.7794	26.5002
TTHERM_00006320	TTNA	CPT	33.7243	33.7532	33.7439	33.6961	33.6521	33.5101	33.435	log2.LFQ.int	0.00655778	0.152988	33.7532	33.435	33.7532
TTHERM_00006320	TTNA	HP	33.4019	33.3716	33.5126	33.6103	33.5783	33.5476	33.4765	log2.LFQ.int	0.00491479	0.123764	33.6103	33.3716	33.6103
TTHERM_00006320	TTNA	HU	33.5432	33.5163	33.3848	33.4232	33.4247	33.466	33.4622	log2.LFQ.int	0.00309838	0.0671962	33.5432	33.3848	33.5432
TTHERM_00006320	TTNA	IR	33.5991	33.5025	33.1559	33.4099	33.3491	33.4206	33.4706	log2.LFQ.int	0.00795247	0.107068	33.5991	33.1559	33.5991
TTHERM_00006320	TTNA	MMS	33.3967	33.5374	33.5005	33.4758	33.446	33.3812	33.4537	log2.LFQ.int	0.00321328	0.0667812	33.5374	33.3812	33.5374
TTHERM_00006320	TTNA	NT1	33.5398	33.4618	33.4772	33.424	33.4296	33.3998	33.3161	log2.LFQ.int	0.00373524	0.0576019	33.5398	33.3161	33.5398
TTHERM_00006320	TTNA	NT2	33.5465	33.4622	33.5063	33.5726	33.5244	33.5725	33.5724	log2.LFQ.int	0.00198108	0.057057	33.5726	33.4622	33.5726
TTHERM_00006320	TTNA	NT3	33.6945	33.7076	33.7162	33.5913	33.6155	33.6541	33.6961	log2.LFQ.int	0.00242099	0.0670889	33.7162	33.5913	33.7162
TTHERM_00006320	TTNA	UV	33.7114	33.528	33.396	33.2769	33.1715	33.0606	33.0855	log2.LFQ.int	0.0141274	0.333496	33.7114	33.0606	33.7114
TTHERM_00006350	SPC110.TTHERM_00006350	CPT	30.8864	30.7506	30.7201	30.6827	30.5703	30.3914	30.2018	log2.LFQ.int	0.0190644	0.254508	30.8864	30.2018	30.8864
TTHERM_00006350	SPC110.TTHERM_00006350	HP	30.1509	30.0678	30.1578	30.2323	29.9396	29.8831	29.868	log2.LFQ.int	0.0125905	0.243051	30.2323	29.868	30.2323
TTHERM_00006350	SPC110.TTHERM_00006350	HU	30.5268	30.3672	30.2541	30.3572	30.0956	29.9504	29.9468	log2.LFQ.int	0.0192443	0.339205	30.5268	29.9468	30.5268
TTHERM_00006350	SPC110.TTHERM_00006350	IR	29.946	29.9501	29.81	29.9872	30.1657	30.0472	30.0853	log2.LFQ.int	0.0111236	0.118176	30.1657	29.81	30.1657
TTHERM_00006350	SPC110.TTHERM_00006350	MMS	30.0465	30.3436	30.377	30.1762	29.9598	29.8727	29.6904	log2.LFQ.int	0.0235586	0.343689	30.377	29.6904	30.377
TTHERM_00006350	SPC110.TTHERM_00006350	NT1	30.3504	30.1311	30.0605	30.0133	29.9669	29.7922	30.0833	log2.LFQ.int	0.0139606	0.117112	30.3504	29.7922	30.3504
TTHERM_00006350	SPC110.TTHERM_00006350	NT2	30.6753	30.4488	30.3875	30.4484	30.3694	30.2506	30.1435	log2.LFQ.int	0.011441	0.138613	30.6753	30.1435	30.6753
TTHERM_00006350	SPC110.TTHERM_00006350	NT3	30.965	30.7724	30.5098	30.4947	30.4312	30.4296	30.2796	log2.LFQ.int	0.0164081	0.210711	30.965	30.2796	30.965
TTHERM_00006350	SPC110.TTHERM_00006350	UV	30.5251	30.2766	30.2303	30.2576	30.0829	30.0929	30.2788	log2.LFQ.int	0.0123272	0.1161	30.5251	30.0829	30.5251
TTHERM_00006380	NA	CPT	26.8284	26.9044	26.8964	27.1803	26.8554	26.5256	26.4474	log2.LFQ.int	0.050153	0.22342	27.1803	26.4474	27.1803
TTHERM_00006380	NA	HP	26.4812	26.3633	26.6394	26.1941	26.8428	27.1034	26.7294	log2.LFQ.int	0.0620342	0.36387	27.1034	26.1941	27.1034
TTHERM_00006380	NA	HU	26.6224	26.7272	26.4697	26.3624	26.5902	26.6763	26.75	log2.LFQ.int	0.0300119	0.171767	26.75	26.3624	26.75
TTHERM_00006380	NA	IR	26.7945	26.6194	26.7936	26.2813	26.5797	26.3036	26.2813	log2.LFQ.int	0.0646897	0.414029	26.7945	26.2813	26.7945
TTHERM_00006380	NA	MMS	27.0318	26.7866	27.1058	27.1093	27.0761	27.3	27.3205	log2.LFQ.int	0.033915	0.150665	27.3205	26.7866	27.3205
TTHERM_00006380	NA	NT1	25.8157	26.5669	26.629	26.5394	26.4092	26.0243	27.0329	log2.LFQ.int	0.0840942	0.381212	27.0329	25.8157	27.0329
TTHERM_00006380	NA	NT2	26.5394	26.704	26.7492	26.7314	26.6863	26.8674	26.5662	log2.LFQ.int	0.0154249	0.114047	26.8674	26.5394	26.8674
TTHERM_00006380	NA	NT3	26.7781	26.7453	26.8	26.723	26.6675	27.1035	26.733	log2.LFQ.int	0.0189027	0.0610534	27.1035	26.6675	27.1035
TTHERM_00006380	NA	UV	26.2404	26.1991	26.2034	25.7739	26.5776	26.6036	26.8621	log2.LFQ.int	0.0966224	0.389358	26.8621	25.7739	26.8621
TTHERM_00006420	NA	CPT	27.9619	28.2438	28.1222	28.086	28.0415	27.9971	28.0832	log2.LFQ.int	0.0124687	0.0847373	28.2438	27.9619	28.2438
TTHERM_00006420	NA	HP	27.4155	27.9178	27.7618	27.5627	27.7857	27.989	28.0012	log2.LFQ.int	0.0301539	0.291182	28.0012	27.4155	28.0012
TTHERM_00006420	NA	HU	27.7943	27.6047	27.7359	27.8144	27.6865	27.6433	27.7823	log2.LFQ.int	0.0118977	0.123379	27.8144	27.6047	27.8144
TTHERM_00006420	NA	IR	28.011	27.8217	27.9124	27.8358	27.8263	27.8409	27.8235	log2.LFQ.int	0.00981286	0.0517289	28.011	27.8217	28.011
TTHERM_00006420	NA	MMS	27.9496	27.8842	28.0666	27.9868	28.1416	28.2425	28.1923	log2.LFQ.int	0.0195846	0.198765	28.2425	27.8842	28.2425
TTHERM_00006420	NA	NT1	27.6805	27.8079	27.3592	27.1906	26.7228	27.7462	27.3525	log2.LFQ.int	0.0561382	0.441791	27.8079	26.7228	27.8079
TTHERM_00006420	NA	NT2	27.8692	27.6841	27.6059	27.698	27.6593	27.6597	27.4571	log2.LFQ.int	0.0126562	0.0584656	27.8692	27.4571	27.8692
TTHERM_00006420	NA	NT3	27.8718	27.9061	27.7923	27.9087	27.8371	27.7944	27.7515	log2.LFQ.int	0.00737193	0.0956064	27.9087	27.7515	27.9087
TTHERM_00006420	NA	UV	28.0017	27.9804	27.9795	28.0254	27.8612	27.7466	27.7287	log2.LFQ.int	0.0180781	0.187156	28.0254	27.7287	28.0254
TTHERM_00006460	NA	CPT	25.2925	25.3134	25.2423	25.7272	25.2864	25.0198	25.218	log2.LFQ.int	0.100919	0.072829	25.7272	25.0198	25.7272
TTHERM_00006460	NA	HP	26.0079	25.857	25.7159	26.311	25.9956	26.2035	26.0694	log2.LFQ.int	0.0523424	0.210143	26.311	25.7159	26.311
TTHERM_00006460	NA	HU	25.5636	25.479	25.5428	25.9646	25.4672	25.3875	25.5006	log2.LFQ.int	0.0598106	0.080164	25.9646	25.3875	25.9646
TTHERM_00006460	NA	IR	25.5618	25.5329	25.3677	26.0204	25.4307	25.6448	25.4103	log2.LFQ.int	0.121104	0.182778	26.0204	25.3677	26.0204
TTHERM_00006460	NA	MMS	25.9545	25.8811	25.8613	26.394	25.907	25.991	25.9846	log2.LFQ.int	0.0514139	0.0937369	26.394	25.8613	26.394
TTHERM_00006460	NA	NT1	25.9675	25.9889	26.0108	26.4568	26.0693	25.988	25.9459	log2.LFQ.int	0.0347576	0.0622813	26.4568	25.9459	26.4568
TTHERM_00006460	NA	NT2	25.5102	25.3978	25.5023	25.9699	25.523	25.5518	25.7305	log2.LFQ.int	0.034794	0.134879	25.9699	25.3978	25.9699
TTHERM_00006460	NA	NT3	25.2687	25.1245	25.1726	25.8488	25.1685	25.335	25.1988	log2.LFQ.int	0.0602201	0.131348	25.8488	25.1245	25.8488
TTHERM_00006460	NA	UV	25.3169	25.7568	25.236	25.8875	25.5275	25.4312	25.612	log2.LFQ.int	0.115487	0.310338	25.8875	25.236	25.8875
TTHERM_000069389	NA	CPT	26.6622	26.6824	26.1328	26.1463	25.6487	25.5721	25.4959	log2.LFQ.int	0.14935	0.793832	26.6824	25.4959	26.6824
TTHERM_000069389	NA	HP	25.9643	26.3995	26.117	26.1329	26.4673	26.1428	26.0608	log2.LFQ.int	0.0419794	0.182223	26.4673	25.9643	26.4673
TTHERM_000069389	NA	HU	26.6486	26.8034	26.5155	26.0734	26.4075	26.194	26.114	log2.LFQ.int	0.0666523	0.428034	26.8034	26.0734	26.8034
TTHERM_000069389	NA	IR	26.5675	26.6073	26.5122	26.4324	26.8317	26.5845	26.8864	log2.LFQ.int	0.0432267	0.179633	26.8864	26.4324	26.8864
TTHERM_000069389	NA	MMS	26.1065	25.9307	25.8427	26.5253	25.9959	25.7804	25.8903	log2.LFQ.int	0.0770608	0.184659	26.5253	25.7804	26.5253
TTHERM_000069389	NA	NT1	26.1428	25.9429	26.008	26.4406	26.1178	26.06	25.9752	log2.LFQ.int	0.0376171	0.138723	26.4406	25.9429	26.4406
TTHERM_000069389	NA	NT2	26.8943	26.4865	26.6859	26.5341	26.6419	26.5516	26.8372	log2.LFQ.int	0.0218951	0.218725	26.8943	26.4865	26.8943
TTHERM_000069389	NA	NT3	26.247	26.5268	26.406	26.0608	26.1754	26.3027	26.4595	log2.LFQ.int	0.0312838	0.221511	26.5268	26.0608	26.5268
TTHERM_000069389	NA	UV	25.9079	25.2866	25.427	25.9208	25.6554	25.3627	25.5134	log2.LFQ.int	0.118531	0.386827	25.9208	25.2866	25.9208
TTHERM_000070849	SSK22.TTHERM_000070849	CPT	25.2503	25.338	25.3583	25.8545	25.4077	25.28	25.1458	log2.LFQ.int	0.099606	0.117829	25.8545	25.1458	25.8545
TTHERM_000070849	SSK22.TTHERM_000070849	HP	25.7635	25.7714	25.7161	26.1942	25.9061	25.9413	25.9867	log2.LFQ.int	0.0448933	0.19652	26.1942	25.7161	26.1942
TTHERM_000070849	SSK22.TTHERM_000070849	HU	25.4453	25.2878	25.4925	25.9595	25.4076	25.6335	25.3597	log2.LFQ.int	0.0824203	0.179392	25.9595	25.2878	25.9595
TTHERM_000070849	SSK22.TTHERM_000070849	IR	25.5375	25.5276	25.5378	26.0322	25.3087	25.2409	25.4341	log2.LFQ.int	0.147524	0.166232	26.0322	25.2409	26.0322
TTHERM_000070849	SSK22.TTHERM_000070849	MMS	25.8618	25.81	25.8811	26.2761	25.9084	26.0456	25.8626	log2.LFQ.int	0.0507086	0.114746	26.2761	25.81	26.2761
TTHERM_000070849	SSK22.TTHERM_000070849	NT1	25.9623	26.0297	25.871	26.3913	25.778	26.0153	25.9133	log2.LFQ.int	0.046127	0.130346	26.3913	25.778	26.3913
TTHERM_000070849	SSK22.TTHERM_000070849	NT2	25.3586	25.4662	25.6077	25.9147	25.3553	25.462	25.3586	log2.LFQ.int	0.0372473	0.178314	25.9147	25.3553	25.9147
TTHERM_000070849	SSK22.TTHERM_000070849	NT3	25.1718	25.2801	25.3614	25.8576	25.2543	25.2392	25.3943	log2.LFQ.int	0.0552859	0.131087	25.8576	25.1718	25.8576
TTHERM_000070849	SSK22.TTHERM_000070849	UV	25.1575	25.2404	25.3319	25.7555	25.4994	25.5217	25.3838	log2.LFQ.int	0.109573	0.224386	25.7555	25.1575	25.7555
TTHERM_000074329	NA	CPT	29.1265	29.0901	28.9966	29.0087	29.1073	29.2877	29.3854	log2.LFQ.int	0.0149768	0.157729	29.3854	28.9966	29.3854
TTHERM_000074329	NA	HP	28.9916	29.0646	29.1355	28.8732	29.0916	28.9126	29.1123	log2.LFQ.int	0.0105146	0.149892	29.1355	28.8732	29.1355
TTHERM_000074329	NA	HU	29.1741	28.984	29.0562	28.9234	29.0227	29.028	28.9853	log2.LFQ.int	0.00794856	0.0574462	29.1741	28.9234	29.1741
TTHERM_000074329	NA	IR	29.1326	28.9314	29.1967	29.1693	29.2014	29.1495	28.9777	log2.LFQ.int	0.0119093	0.127874	29.2014	28.9314	29.2014
TTHERM_000074329	NA	MMS	28.9391	29.2367	28.8762	28.7794	28.9374	28.8687	28.5988	log2.LFQ.int	0.0213563	0.11421	29.2367	28.5988	29.2367
TTHERM_000074329	NA	NT1	29.3011	29.0989	29.1777	28.9801	28.914	28.9968	28.7735	log2.LFQ.int	0.0180518	0.191219	29.3011	28.7735	29.3011
TTHERM_000074329	NA	NT2	29.1687	29.1215	29.1634	29.0222	29.0949	29.1815	29.1227	log2.LFQ.int	0.00444727	0.0578485	29.1815	29.0222	29.1815
TTHERM_000074329	NA	NT3	29.0814	29.0396	29.0327	29.0569	29.0298	28.9609	29.0044	log2.LFQ.int	0.00354228	0.0311668	29.0814	28.9609	29.0814
TTHERM_000074329	NA	UV	29.0653	29.0293	29.0458	29.2651	29.2027	29.1007	29.1533	log2.LFQ.int	0.00973513	0.122477	29.2651	29.0293	29.2651
TTHERM_000077749	VPS33B	CPT	28.9893	28.9469	29.1584	29.2126	29.3536	29.5395	29.5831	log2.LFQ.int	0.0266319	0.37275	29.5831	28.9469	29.5831
TTHERM_000077749	VPS33B	HP	29.3094	29.3235	29.1607	29.2804	29.2012	29.1833	29.0638	log2.LFQ.int	0.00923875	0.122916	29.3235	29.0638	29.3235
TTHERM_000077749	VPS33B	HU	28.6767	28.9282	28.9526	29.1612	29.0949	29.1601	29.1568	log2.LFQ.int	0.0179721	0.218061	29.1612	28.6767	29.1612
TTHERM_000077749	VPS33B	IR	28.682	28.6541	28.7188	28.728	28.7027	28.7733	28.8962	log2.LFQ.int	0.00945611	0.0583035	28.8962	28.6541	28.8962
TTHERM_000077749	VPS33B	MMS	29.0838	29.0376	29.2615	29.1966	29.2532	29.276	29.473	log2.LFQ.int	0.0151361	0.128578	29.473	29.0376	29.473
TTHERM_000077749	VPS33B	NT1	29.0714	29.1535	29.045	29.2231	29.1958	29.2371	29.2314	log2.LFQ.int	0.00762621	0.114785	29.2371	29.045	29.2371
TTHERM_000077749	VPS33B	NT2	28.4393	28.7307	28.6467	28.6851	28.7816	28.8695	29.0067	log2.LFQ.int	0.0159675	0.159675	29.0067	28.4393	29.0067
TTHERM_000077749	VPS33B	NT3	29.1131	29.0721	28.9364	29.2121	29.1189	29.1476	29.148	log2.LFQ.int	0.00742799	0.0551969	29.2121	28.9364	29.2121
TTHERM_000077749	VPS33B	UV	29.0909	29.0031	29.102	29.1551	28.9363	28.9095	29.2826	log2.LFQ.int	0.0147032	0.158802	29.2826	28.9095	29.2826
TTHERM_000079459	NA	CPT	32.3764	32.8785	33.5022	34.0782	34.2228	34.1229	33.6832	log2.LFQ.int	0.0381394	0.91021	34.2228	32.3764	34.2228
TTHERM_000079459	NA	HP	32.074	31.7756	31.5543	31.8111	31.8389	31.9725	32.5448	log2.LFQ.int	0.0192549	0.229888	32.5448	31.5543	32.5448
TTHERM_000079459	NA	HU	32.7354	32.6776	32.6741	32.7235	32.7213	32.5702	32.4825	log2.LFQ.int	0.00537241	0.10026	32.7354	32.4825	32.7354
TTHERM_000079459	NA	IR	32.7773	33.2646	33.1588	33.0743	32.8121	32.7787	32.7783	log2.LFQ.int	0.0124688	0.338049	33.2646	32.7773	33.2646
TTHERM_000079459	NA	MMS	32.2595	32.5993	33.3845	33.6283	33.5737	33.5413	33.6518	log2.LFQ.int	0.0299909	0.609046	33.6518	32.2595	33.6518
TTHERM_000079459	NA	NT1	32.1092	32.213	32.2117	32.2405	32.1601	32.3814	32.8229	log2.LFQ.int	0.012832	0.125097	32.8229	32.1092	32.8229
TTHERM_000079459	NA	NT2	32.7061	32.6919	32.5806	32.6045	32.4541	32.4164	32.4327	log2.LFQ.int	0.00656823	0.20477	32.7061	32.4164	32.7061
TTHERM_000079459	NA	NT3	32.3725	32.5304	32.4106	32.3619	32.3084	32.2756	32.2121	log2.LFQ.int	0.00596955	0.0995406	32.5304	32.2121	32.5304
TTHERM_000079459	NA	UV	32.277	32.5266	32.7929	32.83	32.8893	32.9642	33.0648	log2.LFQ.int	0.0164185	0.267023	33.0648	32.277	33.0648
TTHERM_000084988	NA	CPT	25.2318	25.2523	25.2576	25.8221	25.2214	25.4183	25.4534	log2.LFQ.int	0.0950405	0.193828	25.8221	25.2214	25.8221
TTHERM_000084988	NA	HP	25.8672	25.863	25.6109	26.261	25.9235	25.9563	25.8417	log2.LFQ.int	0.0488755	0.0875608	26.261	25.6109	26.261
TTHERM_000084988	NA	HU	25.3863	25.4573	25.5144	26.0342	25.4572	25.4346	25.4383	log2.LFQ.int	0.0650914	0.0493734	26.0342	25.3863	26.0342
TTHERM_000084988	NA	IR	25.4796	25.4425	25.5881	25.9508	25.4219	25.612	25.4571	log2.LFQ.int	0.0976388	0.150273	25.9508	25.4219	25.9508
TTHERM_000084988	NA	MMS	25.9017	25.9309	25.7849	26.4701	25.8584	26.1169	25.9799	log2.LFQ.int	0.0714305	0.168427	26.4701	25.7849	26.4701
TTHERM_000084988	NA	NT1	25.9552	25.9424	25.8511	26.3059	26.0523	25.9878	26.0589	log2.LFQ.int	0.0341252	0.106765	26.3059	25.8511	26.3059
TTHERM_000084988	NA	NT2	25.333	25.5488	25.4919	26.0613	25.4298	25.5664	25.4487	log2.LFQ.int	0.0408818	0.118306	26.0613	25.333	26.0613
TTHERM_000084988	NA	NT3	25.408	25.2021	25.2231	25.7637	25.2106	25.5291	25.791	log2.LFQ.int	0.0679927	0.429556	25.791	25.2021	25.791
TTHERM_000084988	NA	UV	25.0936	25.5264	25.4203	25.676	25.3726	25.4818	25.3815	log2.LFQ.int	0.0926896	0.127122	25.676	25.0936	25.676
TTHERM_000085179	NA	CPT	25.8029	26.0563	25.891	25.8649	25.9771	26.2361	26.2637	log2.LFQ.int	0.0559952	0.268235	26.2637	25.8029	26.2637
TTHERM_000085179	NA	HP	25.9769	25.8372	26.1687	26.0895	26.067	26.0446	26.0606	log2.LFQ.int	0.0253141	0.0675063	26.1687	25.8372	26.1687
TTHERM_000085179	NA	HU	26.0488	26.219	25.945	26.1813	26.2007	26.6573	26.0921	log2.LFQ.int	0.0530183	0.139392	26.6573	25.945	26.6573
TTHERM_000085179	NA	IR	25.4674	25.3574	25.4885	26.084	25.6823	26.1295	25.4366	log2.LFQ.int	0.162861	0.431101	26.1295	25.3574	26.1295
TTHERM_000085179	NA	MMS	26.0618	26.1607	25.8092	26.4559	26.1529	25.9433	26.0268	log2.LFQ.int	0.06396	0.171715	26.4559	25.8092	26.4559
TTHERM_000085179	NA	NT1	26.0128	26.0601	25.8673	26.5256	25.9637	26.3722	26.2929	log2.LFQ.int	0.0580195	0.344308	26.5256	25.8673	26.5256
TTHERM_000085179	NA	NT2	26.1675	26.1277	25.8859	25.867	26.4548	26.2342	26.4827	log2.LFQ.int	0.0397588	0.337716	26.4827	25.867	26.4827
TTHERM_000085179	NA	NT3	25.3447	25.0874	25.1983	25.8207	25.266	25.2882	25.8998	log2.LFQ.int	0.0818038	0.35053	25.8998	25.0874	25.8998
TTHERM_000085179	NA	UV	25.342	25.3204	25.3957	26	25.7996	25.8901	25.9522	log2.LFQ.int	0.127799	0.55232	26	25.3204	26
TTHERM_00008590	NA	CPT	25.1183	25.0518	24.9189	25.6845	25.2069	25.1357	25.1627	log2.LFQ.int	0.129049	0.0997678	25.6845	24.9189	25.6845
TTHERM_00008590	NA	HP	25.7623	25.9372	25.7496	26.127	25.9728	25.9086	25.8483	log2.LFQ.int	0.0358753	0.149681	26.127	25.7496	26.127
TTHERM_00008590	NA	HU	25.5437	25.4801	25.5233	25.9887	25.5754	25.386	25.4249	log2.LFQ.int	0.0652497	0.107058	25.9887	25.386	25.9887
TTHERM_00008590	NA	IR	25.4309	25.602	25.3209	25.9939	25.5642	25.4842	25.4877	log2.LFQ.int	0.117218	0.125557	25.9939	25.3209	25.9939
TTHERM_00008590	NA	MMS	25.9277	26.0019	25.9044	26.2849	26.0197	25.8216	25.9452	log2.LFQ.int	0.0462597	0.0947165	26.2849	25.8216	26.2849
TTHERM_00008590	NA	NT1	25.8791	26.0194	25.9106	26.683	26.0049	25.8988	26.0087	log2.LFQ.int	0.0544388	0.109346	26.683	25.8791	26.683
TTHERM_00008590	NA	NT2	25.4634	25.6639	25.5506	25.8687	25.4268	25.4254	25.5452	log2.LFQ.int	0.0301225	0.16222	25.8687	25.4254	25.8687
TTHERM_00008590	NA	NT3	25.1132	25.179	25.2917	25.636	25.2902	25.3488	25.5239	log2.LFQ.int	0.0524802	0.201761	25.636	25.1132	25.636
TTHERM_00008590	NA	UV	25.323	25.3177	25.3927	26.0084	25.4953	25.5096	25.3436	log2.LFQ.int	0.10477	0.169132	26.0084	25.3177	26.0084
TTHERM_00008690	NA	CPT	25.4625	25.8355	26.2537	26.2985	26.6657	26.7619	26.9954	log2.LFQ.int	0.141432	0.669151	26.9954	25.4625	26.9954
TTHERM_00008690	NA	HP	26.0417	25.8801	25.699	26.1654	25.9164	25.9897	26.0291	log2.LFQ.int	0.0388656	0.13718	26.1654	25.699	26.1654
TTHERM_00008690	NA	HU	25.523	25.9485	25.9418	25.9388	26.0579	26.3869	26.1345	log2.LFQ.int	0.0707032	0.1559	26.3869	25.523	26.3869
TTHERM_00008690	NA	IR	27.2619	26.7879	26.7349	26.3511	26.042	25.8448	25.6295	log2.LFQ.int	0.182276	0.81799	27.2619	25.6295	27.2619
TTHERM_00008690	NA	MMS	25.7795	26.0477	25.8412	26.5949	26.5618	27.2256	27.0119	log2.LFQ.int	0.151556	0.858907	27.2256	25.7795	27.2256
TTHERM_00008690	NA	NT1	25.7526	25.7851	25.7381	26.2811	25.9569	25.7938	25.9615	log2.LFQ.int	0.0476541	0.190405	26.2811	25.7381	26.2811
TTHERM_00008690	NA	NT2	25.4539	25.7025	25.5337	25.8285	25.4258	25.4689	25.5435	log2.LFQ.int	0.0283194	0.16156	25.8285	25.4258	25.8285
TTHERM_00008690	NA	NT3	25.4315	25.1602	25.3796	25.9864	25.2136	25.1236	25.4538	log2.LFQ.int	0.0747099	0.255822	25.9864	25.1236	25.9864
TTHERM_00008690	NA	UV	26.4891	27.2602	26.9702	26.7255	26.4887	26.2835	25.8591	log2.LFQ.int	0.112472	0.46175	27.2602	25.8591	27.2602
TTHERM_000086966	NA	CPT	26.433	26.0808	25.7802	25.8288	25.3776	25.2186	25.3309	log2.LFQ.int	0.16578	0.600559	26.433	25.2186	26.433
TTHERM_000086966	NA	HP	25.7208	25.9805	25.7176	26.1776	26.0472	25.8925	25.9173	log2.LFQ.int	0.0458179	0.207164	26.1776	25.7176	26.1776
TTHERM_000086966	NA	HU	26.6834	26.0742	26.2972	25.9553	26.3228	26.1162	25.911	log2.LFQ.int	0.067072	0.295218	26.6834	25.911	26.6834
TTHERM_000086966	NA	IR	26.0492	26.528	26.0753	26.5193	26.2841	26.4773	26.4314	log2.LFQ.int	0.0629277	0.318643	26.528	26.0492	26.528
TTHERM_000086966	NA	MMS	26.0524	26.023	25.9978	26.4134	25.717	25.9447	26.0238	log2.LFQ.int	0.0620452	0.0668475	26.4134	25.717	26.4134
TTHERM_000086966	NA	NT1	25.8464	25.8837	25.9221	26.565	25.7348	26.0206	26.027	log2.LFQ.int	0.06085	0.158769	26.565	25.7348	26.565
TTHERM_000086966	NA	NT2	26.5322	26.539	26.7191	26.5758	26.4998	26.5946	26.5575	log2.LFQ.int	0.00936213	0.0496217	26.7191	26.4998	26.7191
TTHERM_000086966	NA	NT3	26.7765	26.9994	27.0381	26.9018	26.9637	27.0143	26.8756	log2.LFQ.int	0.0139224	0.118129	27.0381	26.7765	27.0381
TTHERM_000086966	NA	UV	26.7188	26.5736	26.067	26.1716	25.8883	25.2946	25.3382	log2.LFQ.int	0.186854	0.759343	26.7188	25.2946	26.7188
TTHERM_000088159	PPH21.TTHERM_000088159	CPT	32.8139	32.8525	32.8596	32.8481	32.8331	32.9113	32.9294	log2.LFQ.int	0.00246365	0.0448032	32.9294	32.8139	32.9294
TTHERM_000088159	PPH21.TTHERM_000088159	HP	32.8575	32.8268	32.9471	32.8396	32.8166	32.7654	32.8172	log2.LFQ.int	0.00300868	0.0316337	32.9471	32.7654	32.9471
TTHERM_000088159	PPH21.TTHERM_000088159	HU	33.1064	33.0951	33.0282	33.0325	33.0387	33.0452	33.1053	log2.LFQ.int	0.00201113	0.0646154	33.1064	33.0282	33.1064
TTHERM_000088159	PPH21.TTHERM_000088159	IR	33.1576	33.11	33.103	33.0616	33.1007	33.0388	33.0874	log2.LFQ.int	0.00228137	0.0320245	33.1576	33.0388	33.1576
TTHERM_000088159	PPH21.TTHERM_000088159	MMS	32.7523	32.7768	32.6907	32.8141	32.7828	32.8021	32.6954	log2.LFQ.int	0.00303227	0.0686065	32.8141	32.6907	32.8141
TTHERM_000088159	PPH21.TTHERM_000088159	NT1	32.9542	32.8949	32.8454	32.8934	32.8711	32.9438	32.7448	log2.LFQ.int	0.00390052	0.0611109	32.9542	32.7448	32.9542
TTHERM_000088159	PPH21.TTHERM_000088159	NT2	33.1397	33.1395	33.2027	33.1272	33.0716	33.1995	33.0648	log2.LFQ.int	0.0027467	0.0702372	33.2027	33.0648	33.2027
TTHERM_000088159	PPH21.TTHERM_000088159	NT3	32.7723	32.7874	32.7734	32.8202	32.8029	32.8649	32.8465	log2.LFQ.int	0.00201028	0.0529327	32.8649	32.7723	32.8649
TTHERM_000088159	PPH21.TTHERM_000088159	UV	32.8339	32.8523	32.7373	32.7203	32.7224	32.6163	32.6721	log2.LFQ.int	0.00517897	0.0893842	32.8523	32.6163	32.8523
TTHERM_000091579	ERG10.TTHERM_000091579	CPT	28.199	27.9655	27.918	27.9227	27.814	27.61	27.694	log2.LFQ.int	0.0279615	0.190091	28.199	27.61	28.199
TTHERM_000091579	ERG10.TTHERM_000091579	HP	28.697	28.6969	28.5126	28.2611	28.8148	29.0152	28.7139	log2.LFQ.int	0.0253644	0.159536	29.0152	28.2611	29.0152
TTHERM_000091579	ERG10.TTHERM_000091579	HU	28.2337	28.1964	28.2183	28.3525	28.2333	28.1636	28.1301	log2.LFQ.int	0.00857972	0.0534848	28.3525	28.1301	28.3525
TTHERM_000091579	ERG10.TTHERM_000091579	IR	28.0642	28.0296	28.2865	28.3915	28.2589	28.2931	28.3366	log2.LFQ.int	0.019237	0.15331	28.3915	28.0296	28.3915
TTHERM_000091579	ERG10.TTHERM_000091579	MMS	28.9032	28.2271	28.307	28.5627	28.6803	28.522	28.3859	log2.LFQ.int	0.029958	0.275052	28.9032	28.2271	28.9032
TTHERM_000091579	ERG10.TTHERM_000091579	NT1	28.2824	28.4816	28.5035	28.6294	28.4565	28.4753	28.5178	log2.LFQ.int	0.0108533	0.0448093	28.6294	28.2824	28.6294
TTHERM_000091579	ERG10.TTHERM_000091579	NT2	28.0651	28.1937	28.1382	28.159	28.1272	28.1097	28.0535	log2.LFQ.int	0.00507634	0.061221	28.1937	28.0535	28.1937
TTHERM_000091579	ERG10.TTHERM_000091579	NT3	27.9291	27.6148	27.7778	28.0382	27.7692	27.7007	27.9738	log2.LFQ.int	0.0188004	0.216556	28.0382	27.6148	28.0382
TTHERM_000091579	ERG10.TTHERM_000091579	UV	27.9269	27.9286	27.9421	28.1051	28.2804	28.5081	28.4325	log2.LFQ.int	0.0341952	0.421088	28.5081	27.9269	28.5081
TTHERM_000092809	NA	CPT	25.385	25.397	26.0123	25.8558	25.9952	24.9446	25.323	log2.LFQ.int	0.168597	0.57149	26.0123	24.9446	26.0123
TTHERM_000092809	NA	HP	25.9506	26.1297	25.7445	26.3398	25.9755	25.9148	25.984	log2.LFQ.int	0.0465337	0.124166	26.3398	25.7445	26.3398
TTHERM_000092809	NA	HU	26.0853	26.3568	26.3531	26.6189	26.7338	26.7199	27.1328	log2.LFQ.int	0.0734681	0.371862	27.1328	26.0853	27.1328
TTHERM_000092809	NA	IR	26.2562	26.712	26.6486	26.5041	26.7841	26.6537	26.9781	log2.LFQ.int	0.0585845	0.171762	26.9781	26.2562	26.9781
TTHERM_000092809	NA	MMS	25.8204	25.8118	26.0133	26.3611	25.9255	26.0216	26.0196	log2.LFQ.int	0.0581574	0.147651	26.3611	25.8118	26.3611
TTHERM_000092809	NA	NT1	25.6807	25.7811	25.8906	26.2165	26.1023	26.3997	27.1616	log2.LFQ.int	0.112407	0.472252	27.1616	25.6807	27.1616
TTHERM_000092809	NA	NT2	25.5247	26.4759	26.1811	26.6462	26.3508	27.0892	26.6672	log2.LFQ.int	0.0711694	0.390748	27.0892	25.5247	27.0892
TTHERM_000092809	NA	NT3	27.4373	27.3018	27.1308	27.0998	27.4108	27.4862	27.4861	log2.LFQ.int	0.0215534	0.24541	27.4862	27.0998	27.4862
TTHERM_000092809	NA	UV	25.0185	25.2326	27.0232	26.8954	27.3553	27.6802	27.5777	log2.LFQ.int	0.242518	1.4025	27.6802	25.0185	27.6802
TTHERM_000094109	PAB1.TTHERM_000094109	CPT	29.2978	29.1607	29.0416	29.199	29.1291	29.0866	29.1149	log2.LFQ.int	0.00883255	0.0790799	29.2978	29.0416	29.2978
TTHERM_000094109	PAB1.TTHERM_000094109	HP	28.8714	28.812	28.9065	28.7616	28.8926	28.874	28.9546	log2.LFQ.int	0.00666212	0.0578731	28.9546	28.7616	28.9546
TTHERM_000094109	PAB1.TTHERM_000094109	HU	29.1955	28.971	28.8245	28.9558	28.8456	29.014	28.9193	log2.LFQ.int	0.0128761	0.110049	29.1955	28.8245	29.1955
TTHERM_000094109	PAB1.TTHERM_000094109	IR	29.0922	29.0385	29.0316	29.225	29.1197	28.8996	28.9679	log2.LFQ.int	0.0125805	0.106194	29.225	28.8996	29.225
TTHERM_000094109	PAB1.TTHERM_000094109	MMS	28.7656	28.7298	28.6301	28.7804	28.69	28.607	28.5565	log2.LFQ.int	0.0106059	0.12913	28.7804	28.5565	28.7804
TTHERM_000094109	PAB1.TTHERM_000094109	NT1	28.7781	28.7798	28.821	28.8915	28.7487	28.6479	28.6561	log2.LFQ.int	0.00934852	0.0979461	28.8915	28.6479	28.8915
TTHERM_000094109	PAB1.TTHERM_000094109	NT2	29.136	29.0981	29.0238	29.0952	29.0399	29.0059	29.1021	log2.LFQ.int	0.00406823	0.0682616	29.136	29.0059	29.136
TTHERM_000094109	PAB1.TTHERM_000094109	NT3	29.1397	29.2675	29.2943	29.2225	29.0894	29.1092	29.2212	log2.LFQ.int	0.00732132	0.12054	29.2943	29.0894	29.2943
TTHERM_000094109	PAB1.TTHERM_000094109	UV	29.3077	29.1681	29.109	28.9655	28.9706	29.146	29.1433	log2.LFQ.int	0.0128202	0.117269	29.3077	28.9655	29.3077
TTHERM_000105239	NA	CPT	25.2464	25.4956	25.7057	25.6365	25.542	25.765	25.7285	log2.LFQ.int	0.0716811	0.198284	25.765	25.2464	25.765
TTHERM_000105239	NA	HP	25.7373	25.6862	25.7568	26.1919	26.0721	26.1752	26.03	log2.LFQ.int	0.0576589	0.376633	26.1919	25.6862	26.1919
TTHERM_000105239	NA	HU	25.5901	25.3593	25.365	26.0204	25.3908	25.4779	25.4627	log2.LFQ.int	0.077791	0.156101	26.0204	25.3593	26.0204
TTHERM_000105239	NA	IR	25.3946	25.4439	25.4751	25.9859	25.4455	25.3783	25.2406	log2.LFQ.int	0.130499	0.0738034	25.9859	25.2406	25.9859
TTHERM_000105239	NA	MMS	25.574	25.9712	25.9931	26.4197	25.8036	26.1027	25.829	log2.LFQ.int	0.0919283	0.231592	26.4197	25.574	26.4197
TTHERM_000105239	NA	NT1	25.7412	25.926	25.8526	26.541	25.8536	25.8499	26.0125	log2.LFQ.int	0.0578835	0.117962	26.541	25.7412	26.541
TTHERM_000105239	NA	NT2	25.557	25.3777	25.4285	25.8812	25.5669	25.5473	25.5763	log2.LFQ.int	0.0290952	0.083729	25.8812	25.3777	25.8812
TTHERM_000105239	NA	NT3	25.2441	25.2994	25.298	25.7858	25.135	25.2395	25.2624	log2.LFQ.int	0.048613	0.0568843	25.7858	25.135	25.7858
TTHERM_000105239	NA	UV	25.4489	25.3746	25.2445	25.8672	25.3026	25.49	25.3518	log2.LFQ.int	0.0987393	0.142262	25.8672	25.2445	25.8672
TTHERM_00010970	TOM71.TTHERM_00010970	CPT	29.3521	29.2691	29.193	29.1759	29.0667	29.0662	29.0713	log2.LFQ.int	0.0117067	0.162089	29.3521	29.0662	29.3521
TTHERM_00010970	TOM71.TTHERM_00010970	HP	29.2805	29.2101	29.4129	29.5995	29.607	29.8605	30.1072	log2.LFQ.int	0.0297533	0.387086	30.1072	29.2101	30.1072
TTHERM_00010970	TOM71.TTHERM_00010970	HU	29.22	29.038	29.19	28.98	28.9383	29.1115	29.1964	log2.LFQ.int	0.0119238	0.184203	29.22	28.9383	29.22
TTHERM_00010970	TOM71.TTHERM_00010970	IR	28.9082	29.097	29.3289	29.3143	29.3918	29.5222	29.4805	log2.LFQ.int	0.0239055	0.230553	29.5222	28.9082	29.5222
TTHERM_00010970	TOM71.TTHERM_00010970	MMS	29.3743	29.3581	29.3945	29.0655	29.1818	28.9323	28.9952	log2.LFQ.int	0.02119	0.335825	29.3945	28.9323	29.3945
TTHERM_00010970	TOM71.TTHERM_00010970	NT1	29.4368	29.3504	29.2722	29.3574	29.3258	29.1711	29.3956	log2.LFQ.int	0.00822961	0.0775108	29.4368	29.1711	29.4368
TTHERM_00010970	TOM71.TTHERM_00010970	NT2	29.276	29.1119	29.229	29.328	29.4434	29.376	29.2331	log2.LFQ.int	0.00898681	0.120982	29.4434	29.1119	29.4434
TTHERM_00010970	TOM71.TTHERM_00010970	NT3	29.2197	29.2839	29.2489	29.0779	29.2029	29.3918	29.3069	log2.LFQ.int	0.00867916	0.0841261	29.3918	29.0779	29.3918
TTHERM_00010970	TOM71.TTHERM_00010970	UV	29.114	29.3086	29.8899	30.2434	30.4012	30.6879	30.8773	log2.LFQ.int	0.0623663	0.94529	30.8773	29.114	30.8773
TTHERM_00011020	ATG4.TTHERM_00011020	CPT	25.4664	25.648	25.9611	25.9086	26.2216	26.5544	26.3339	log2.LFQ.int	0.121004	0.499479	26.5544	25.4664	26.5544
TTHERM_00011020	ATG4.TTHERM_00011020	HP	25.8109	26.0425	25.6817	26.4733	25.8615	25.9129	26.0775	log2.LFQ.int	0.0647512	0.223829	26.4733	25.6817	26.4733
TTHERM_00011020	ATG4.TTHERM_00011020	HU	26.221	26.2282	26.7046	26.8245	26.803	26.6931	26.8131	log2.LFQ.int	0.052307	0.347427	26.8245	26.221	26.8245
TTHERM_00011020	ATG4.TTHERM_00011020	IR	26.0165	26.1709	25.5668	26.0156	25.2696	25.4257	25.3248	log2.LFQ.int	0.194911	0.640875	26.1709	25.2696	26.1709
TTHERM_00011020	ATG4.TTHERM_00011020	MMS	26.7931	25.9201	26.2195	26.5085	26.3205	25.9148	25.9896	log2.LFQ.int	0.0967968	0.459661	26.7931	25.9148	26.7931
TTHERM_00011020	ATG4.TTHERM_00011020	NT1	26.6057	26.5613	26.1508	26.3745	26.7982	26.4769	26.7085	log2.LFQ.int	0.0441918	0.231416	26.7982	26.1508	26.7982
TTHERM_00011020	ATG4.TTHERM_00011020	NT2	25.7751	25.8777	26.1436	26.3264	26.0604	25.9922	26.3829	log2.LFQ.int	0.0380694	0.300048	26.3829	25.7751	26.3829
TTHERM_00011020	ATG4.TTHERM_00011020	NT3	25.9679	25.8298	26.2983	25.9587	26.3508	26.4605	26.4688	log2.LFQ.int	0.050839	0.442365	26.4688	25.8298	26.4688
TTHERM_00011020	ATG4.TTHERM_00011020	UV	26.1027	26.0111	26.1089	26.3259	26.3527	26.4694	25.9323	log2.LFQ.int	0.0599703	0.282431	26.4694	25.9323	26.4694
TTHERM_00011030	NA	CPT	25.3741	25.8822	25.1746	25.8436	25.2355	25.2018	25.2799	log2.LFQ.int	0.133575	0.390247	25.8822	25.1746	25.8822
TTHERM_00011030	NA	HP	26.9284	25.9386	27.8217	27.4989	27.4726	28.1836	27.7233	log2.LFQ.int	0.107393	0.571985	28.1836	25.9386	28.1836
TTHERM_00011030	NA	HU	25.3733	26.4164	25.4419	26.1415	25.5676	25.5062	25.5051	log2.LFQ.int	0.124399	0.381073	26.4164	25.3733	26.4164
TTHERM_00011030	NA	IR	25.4804	25.5746	25.5208	26.1477	25.4321	25.655	25.5979	log2.LFQ.int	0.113533	0.125827	26.1477	25.4321	26.1477
TTHERM_00011030	NA	MMS	27.3193	26.6852	27.4561	26.8171	26.7097	26.993	26.9229	log2.LFQ.int	0.0606598	0.392752	27.4561	26.6852	27.4561
TTHERM_00011030	NA	NT1	26.6559	27.5423	27.1829	27.4011	25.9117	26.837	26.8064	log2.LFQ.int	0.0947968	0.560856	27.5423	25.9117	27.5423
TTHERM_00011030	NA	NT2	25.5172	25.4382	25.3734	25.9547	26.3477	25.3922	25.7094	log2.LFQ.int	0.0658896	0.416873	26.3477	25.3734	26.3477
TTHERM_00011030	NA	NT3	25.3958	25.3034	25.2614	25.8119	25.1663	25.3751	25.3078	log2.LFQ.int	0.0506248	0.103009	25.8119	25.1663	25.8119
TTHERM_00011030	NA	UV	25.0886	25.2454	25.3263	25.907	26.5768	25.3498	26.7719	log2.LFQ.int	0.26453	0.95605	26.7719	25.0886	26.7719
TTHERM_00011120	APE4.TTHERM_00011120	CPT	28.9836	28.9399	28.8921	28.992	29.0074	28.8048	28.6887	log2.LFQ.int	0.0127359	0.139382	29.0074	28.6887	29.0074
TTHERM_00011120	APE4.TTHERM_00011120	HP	28.9922	28.9466	29.1196	29.1911	28.8997	29.1301	29.0394	log2.LFQ.int	0.0111429	0.155466	29.1911	28.8997	29.1911
TTHERM_00011120	APE4.TTHERM_00011120	HU	29.1415	29.0989	29.219	29.1533	29.0856	29.1724	29.1738	log2.LFQ.int	0.00479194	0.0529019	29.219	29.0856	29.219
TTHERM_00011120	APE4.TTHERM_00011120	IR	28.9	28.8381	28.9595	29.0829	29.0229	29.0995	29.1042	log2.LFQ.int	0.0125497	0.161471	29.1042	28.8381	29.1042
TTHERM_00011120	APE4.TTHERM_00011120	MMS	28.9494	28.9781	29.063	29.1739	29.2681	29.1222	28.9902	log2.LFQ.int	0.0131672	0.163868	29.2681	28.9494	29.2681
TTHERM_00011120	APE4.TTHERM_00011120	NT1	29.2056	29.2025	29.0622	29.2827	29.3198	29.2321	29.1082	log2.LFQ.int	0.00902686	0.102092	29.3198	29.0622	29.3198
TTHERM_00011120	APE4.TTHERM_00011120	NT2	29.0631	29.0934	29.1529	29.1721	29.09	29.2966	29.3024	log2.LFQ.int	0.00800823	0.142658	29.3024	29.0631	29.3024
TTHERM_00011120	APE4.TTHERM_00011120	NT3	29.0327	29.014	29.0613	29.1599	29.016	29.0318	29.0859	log2.LFQ.int	0.00449041	0.0496826	29.1599	29.014	29.1599
TTHERM_00011120	APE4.TTHERM_00011120	UV	28.8742	28.9283	29.0405	29.2729	29.308	29.532	29.6545	log2.LFQ.int	0.0327371	0.435573	29.6545	28.8742	29.6545
TTHERM_00011170	CYC8.TTHERM_00011170	CPT	28.3401	28.3287	28.2177	28.1515	28.045	28.2143	28.2537	log2.LFQ.int	0.013463	0.108303	28.3401	28.045	28.3401
TTHERM_00011170	CYC8.TTHERM_00011170	HP	28.6383	28.7811	28.8891	28.5503	28.8736	28.9614	28.8909	log2.LFQ.int	0.0158136	0.180255	28.9614	28.5503	28.9614
TTHERM_00011170	CYC8.TTHERM_00011170	HU	28.2601	28.3992	28.2138	28.5512	28.2977	28.1187	28.0643	log2.LFQ.int	0.0211122	0.182212	28.5512	28.0643	28.5512
TTHERM_00011170	CYC8.TTHERM_00011170	IR	28.0314	28.4589	28.6685	28.3803	28.5396	28.4406	28.4056	log2.LFQ.int	0.0250964	0.106289	28.6685	28.0314	28.6685
TTHERM_00011170	CYC8.TTHERM_00011170	MMS	28.703	28.7546	28.5968	28.8293	28.5944	28.4914	28.222	log2.LFQ.int	0.0244141	0.185853	28.8293	28.222	28.8293
TTHERM_00011170	CYC8.TTHERM_00011170	NT1	28.5679	28.8498	28.6896	28.8796	28.7316	28.6025	28.6635	log2.LFQ.int	0.012963	0.157737	28.8796	28.5679	28.8796
TTHERM_00011170	CYC8.TTHERM_00011170	NT2	28.4304	28.4072	28.3108	28.3332	28.2475	28.2031	28.1723	log2.LFQ.int	0.00976732	0.144919	28.4304	28.1723	28.4304
TTHERM_00011170	CYC8.TTHERM_00011170	NT3	28.3917	28.2863	28.3433	28.3505	28.3527	28.1514	28.1277	log2.LFQ.int	0.0108218	0.132748	28.3917	28.1277	28.3917
TTHERM_00011170	CYC8.TTHERM_00011170	UV	28.2712	28.3395	28.5404	28.5456	28.6801	28.4711	28.6122	log2.LFQ.int	0.0187409	0.173564	28.6801	28.2712	28.6801
TTHERM_00011180	APRT1	CPT	31.0815	31.0515	30.9914	31.1001	31.1084	31.0345	31.0909	log2.LFQ.int	0.00316818	0.0525023	31.1084	30.9914	31.1084
TTHERM_00011180	APRT1	HP	31.22	31.2631	31.2947	31.2551	31.2381	31.2014	31.1883	log2.LFQ.int	0.00270487	0.0483674	31.2947	31.1883	31.2947
TTHERM_00011180	APRT1	HU	30.9126	31.0352	31.0005	31.0754	31.0919	31.0231	31.1179	log2.LFQ.int	0.00507982	0.0718586	31.1179	30.9126	31.1179
TTHERM_00011180	APRT1	IR	30.9016	30.9015	30.9168	30.8856	30.883	30.8656	31.0082	log2.LFQ.int	0.00336522	0.0249095	31.0082	30.8656	31.0082
TTHERM_00011180	APRT1	MMS	31.1815	31.2379	31.0334	31.0659	31.0822	31.0084	31.0174	log2.LFQ.int	0.00659123	0.106449	31.2379	31.0084	31.2379
TTHERM_00011180	APRT1	NT1	31.3004	31.2701	31.2032	31.333	31.2166	31.1837	31.0788	log2.LFQ.int	0.00599955	0.0918316	31.333	31.0788	31.333
TTHERM_00011180	APRT1	NT2	30.9862	31.0753	31.0331	31.1116	31.0288	31.114	31.1358	log2.LFQ.int	0.00352958	0.0818563	31.1358	30.9862	31.1358
TTHERM_00011180	APRT1	NT3	31.0038	30.941	30.9678	31.1454	30.9543	30.9898	30.9984	log2.LFQ.int	0.00406267	0.0400288	31.1454	30.941	31.1454
TTHERM_00011180	APRT1	UV	30.9736	30.9951	31.011	31.0006	30.9964	31.0246	31.0474	log2.LFQ.int	0.00184386	0.0220708	31.0474	30.9736	31.0474
TTHERM_00011190	NA	CPT	27.2345	27.1975	27.1615	26.5266	26.8975	26.9007	27.1376	log2.LFQ.int	0.0457294	0.280411	27.2345	26.5266	27.2345
TTHERM_00011190	NA	HP	26.9749	26.9768	26.7714	26.7767	25.911	27.0764	26.9389	log2.LFQ.int	0.0610957	0.201779	27.0764	25.911	27.0764
TTHERM_00011190	NA	HU	27.2398	27.4015	27.1773	26.8699	27.228	27.2004	27.1882	log2.LFQ.int	0.0240561	0.0511191	27.4015	26.8699	27.4015
TTHERM_00011190	NA	IR	27.2464	27.2993	27.2269	27.3092	27.1704	27.0846	27.1933	log2.LFQ.int	0.0159847	0.0909899	27.3092	27.0846	27.3092
TTHERM_00011190	NA	MMS	27.2994	26.5329	26.3341	26.6412	26.449	25.92	26.5197	log2.LFQ.int	0.0969127	0.19549	27.2994	25.92	27.2994
TTHERM_00011190	NA	NT1	27.4633	27.2853	27.0513	27.4224	27.3485	27.2005	27.0402	log2.LFQ.int	0.0270061	0.259526	27.4633	27.0402	27.4633
TTHERM_00011190	NA	NT2	27.3853	27.2513	27.4249	27.4102	27.1847	27.3017	27.2886	log2.LFQ.int	0.0107212	0.127793	27.4249	27.1847	27.4249
TTHERM_00011190	NA	NT3	27.3012	27.2983	27.2937	27.0455	27.3972	27.4981	27.234	log2.LFQ.int	0.0183788	0.0853597	27.4981	27.0455	27.4981
TTHERM_00011190	NA	UV	27.3069	27.9648	28.0672	28.2305	28.4607	28.3374	28.2058	log2.LFQ.int	0.0494173	0.26794	28.4607	27.3069	28.4607
TTHERM_00011210	RET3.TTHERM_00011210	CPT	27.8143	27.8484	27.8572	27.8532	27.8862	28.0969	28.2013	log2.LFQ.int	0.01921	0.140755	28.2013	27.8143	28.2013
TTHERM_00011210	RET3.TTHERM_00011210	HP	28.4661	28.5769	28.3747	28.1738	28.5028	28.6363	28.761	log2.LFQ.int	0.0218936	0.186196	28.761	28.1738	28.761
TTHERM_00011210	RET3.TTHERM_00011210	HU	27.7863	27.7175	27.6136	27.9345	27.7192	27.7858	27.8394	log2.LFQ.int	0.0145649	0.0945429	27.9345	27.6136	27.9345
TTHERM_00011210	RET3.TTHERM_00011210	IR	27.6716	27.6054	27.6509	27.8841	27.6314	27.7182	27.9028	log2.LFQ.int	0.0198097	0.160007	27.9028	27.6054	27.9028
TTHERM_00011210	RET3.TTHERM_00011210	MMS	28.4803	28.2416	28.2473	28.6157	28.4546	28.4798	27.9744	log2.LFQ.int	0.0278126	0.23556	28.6157	27.9744	28.6157
TTHERM_00011210	RET3.TTHERM_00011210	NT1	28.2185	28.3474	28.2004	28.5132	28.4748	28.4338	28.2018	log2.LFQ.int	0.0159663	0.244173	28.5132	28.2004	28.5132
TTHERM_00011210	RET3.TTHERM_00011210	NT2	27.867	27.7763	27.6468	27.8874	27.7924	27.9149	27.8914	log2.LFQ.int	0.00955612	0.105054	27.9149	27.6468	27.9149
TTHERM_00011210	RET3.TTHERM_00011210	NT3	27.9739	27.8034	27.8994	27.9399	27.9838	27.9754	27.871	log2.LFQ.int	0.00767975	0.089401	27.9838	27.8034	27.9838
TTHERM_00011210	RET3.TTHERM_00011210	UV	27.9471	27.711	27.7864	26.7682	27.8929	27.8725	28.2307	log2.LFQ.int	0.0619576	0.171294	28.2307	26.7682	28.2307
TTHERM_00011220	CMK2.TTHERM_00011220	CPT	31.0698	31.0369	30.9357	30.8902	30.6927	30.6907	30.5523	log2.LFQ.int	0.0156362	0.294557	31.0698	30.5523	31.0698
TTHERM_00011220	CMK2.TTHERM_00011220	HP	31.3048	31.3036	31.5236	31.3528	31.2756	31.132	31.298	log2.LFQ.int	0.00749143	0.0420579	31.5236	31.132	31.5236
TTHERM_00011220	CMK2.TTHERM_00011220	HU	31.1268	31.2466	31.369	31.4828	31.4332	31.54	31.625	log2.LFQ.int	0.0124414	0.203597	31.625	31.1268	31.625
TTHERM_00011220	CMK2.TTHERM_00011220	IR	31.0976	31.0766	30.9653	31.0343	30.9883	31.1303	31.2446	log2.LFQ.int	0.00759125	0.102656	31.2446	30.9653	31.2446
TTHERM_00011220	CMK2.TTHERM_00011220	MMS	31.3594	31.4548	31.4828	31.6253	31.5732	31.564	31.5063	log2.LFQ.int	0.0064875	0.0997823	31.6253	31.3594	31.6253
TTHERM_00011220	CMK2.TTHERM_00011220	NT1	31.4431	31.4054	31.4257	31.4915	31.5666	31.5081	31.4032	log2.LFQ.int	0.00416177	0.0842265	31.5666	31.4032	31.5666
TTHERM_00011220	CMK2.TTHERM_00011220	NT2	31.1242	31.136	31.237	31.3014	31.2486	31.3505	31.4181	log2.LFQ.int	0.00679573	0.139446	31.4181	31.1242	31.4181
TTHERM_00011220	CMK2.TTHERM_00011220	NT3	31.1562	31.0949	31.0763	31.1602	31.2945	31.3734	31.3968	log2.LFQ.int	0.00880135	0.208407	31.3968	31.0763	31.3968
TTHERM_00011220	CMK2.TTHERM_00011220	UV	31.1517	31.0547	30.9784	30.8293	30.9233	30.9208	31.0105	log2.LFQ.int	0.00829138	0.110533	31.1517	30.8293	31.1517
TTHERM_00011270	NA	CPT	25.1311	25.4976	25.241	25.8727	25.526	25.1568	25.3684	log2.LFQ.int	0.124564	0.312942	25.8727	25.1311	25.8727
TTHERM_00011270	NA	HP	25.8555	25.9445	25.5013	26.3533	25.926	26.0952	26.2183	log2.LFQ.int	0.0721525	0.265968	26.3533	25.5013	26.3533
TTHERM_00011270	NA	HU	25.9904	25.5457	25.5616	26.0212	25.5304	25.6092	25.6359	log2.LFQ.int	0.0663726	0.259474	26.0212	25.5304	26.0212
TTHERM_00011270	NA	IR	25.5546	25.6011	25.5837	25.907	25.9402	25.507	25.8516	log2.LFQ.int	0.0925968	0.310186	25.9402	25.507	25.9402
TTHERM_00011270	NA	MMS	25.8779	25.7927	25.7085	26.6432	25.9758	26.053	25.8987	log2.LFQ.int	0.093033	0.17913	26.6432	25.7085	26.6432
TTHERM_00011270	NA	NT1	25.968	25.9384	26.1187	26.5841	25.9503	25.8554	26.0689	log2.LFQ.int	0.0524524	0.149447	26.5841	25.8554	26.5841
TTHERM_00011270	NA	NT2	25.8938	25.8859	25.5112	26.0017	25.8958	25.6746	25.6814	log2.LFQ.int	0.0310879	0.216778	26.0017	25.5112	26.0017
TTHERM_00011270	NA	NT3	25.0835	25.233	25.2742	25.7387	25.2356	25.1921	25.3956	log2.LFQ.int	0.0556998	0.122358	25.7387	25.0835	25.7387
TTHERM_00011270	NA	UV	25.3389	25.2518	25.5637	25.9324	25.4133	25.5387	25.3681	log2.LFQ.int	0.10715	0.197703	25.9324	25.2518	25.9324
TTHERM_00011280	DAP1.TTHERM_00011280	CPT	28.0434	28.059	28.0176	27.9481	27.9531	27.9451	27.9747	log2.LFQ.int	0.00667748	0.0798907	28.059	27.9451	28.059
TTHERM_00011280	DAP1.TTHERM_00011280	HP	28.034	28.0119	28.2696	28.1521	27.9918	28.2187	28.2892	log2.LFQ.int	0.0158279	0.221176	28.2892	27.9918	28.2892
TTHERM_00011280	DAP1.TTHERM_00011280	HU	28.199	28.4367	28.4751	28.5369	28.4012	28.2791	28.5563	log2.LFQ.int	0.016105	0.165894	28.5563	28.199	28.5563
TTHERM_00011280	DAP1.TTHERM_00011280	IR	28.2489	28.2946	28.4158	28.4264	28.4423	28.4363	28.3521	log2.LFQ.int	0.0104354	0.107993	28.4423	28.2489	28.4423
TTHERM_00011280	DAP1.TTHERM_00011280	MMS	28.1394	28.2727	28.3618	28.347	28.437	28.4075	28.2332	log2.LFQ.int	0.0142056	0.131655	28.437	28.1394	28.437
TTHERM_00011280	DAP1.TTHERM_00011280	NT1	28.3043	28.2534	28.2003	28.407	28.2557	28.3332	28.0719	log2.LFQ.int	0.0126519	0.0919264	28.407	28.0719	28.407
TTHERM_00011280	DAP1.TTHERM_00011280	NT2	28.1955	28.3914	28.333	28.2618	28.1998	28.2787	28.3406	log2.LFQ.int	0.00726269	0.106036	28.3914	28.1955	28.3914
TTHERM_00011280	DAP1.TTHERM_00011280	NT3	28.2005	28.1988	28.1841	28.3159	28.2313	28.1349	28.2409	log2.LFQ.int	0.00601573	0.0446664	28.3159	28.1349	28.3159
TTHERM_00011280	DAP1.TTHERM_00011280	UV	28.0276	28.0024	28.0109	27.3684	28.0503	28.0039	28.0723	log2.LFQ.int	0.0263113	0.0358007	28.0723	27.3684	28.0723
TTHERM_00011310	NA	CPT	25.211	25.3021	25.2963	25.6015	25.4607	25.7857	25.6819	log2.LFQ.int	0.100691	0.34252	25.7857	25.211	25.7857
TTHERM_00011310	NA	HP	25.9362	25.962	25.9515	26.2255	25.9985	26.0747	25.9007	log2.LFQ.int	0.0268439	0.0927872	26.2255	25.9007	26.2255
TTHERM_00011310	NA	HU	25.421	25.4788	25.4649	25.959	25.6692	25.4587	25.4748	log2.LFQ.int	0.061503	0.1122	25.959	25.421	25.959
TTHERM_00011310	NA	IR	25.3926	25.2468	25.5263	25.9209	25.4992	25.4526	25.5351	log2.LFQ.int	0.12062	0.108126	25.9209	25.2468	25.9209
TTHERM_00011310	NA	MMS	25.8165	25.9632	25.6605	26.2533	26.0167	25.9171	25.9338	log2.LFQ.int	0.0628049	0.123188	26.2533	25.6605	26.2533
TTHERM_00011310	NA	NT1	25.7279	25.9034	25.9434	26.3259	25.8168	26.0801	26.0146	log2.LFQ.int	0.0501901	0.187267	26.3259	25.7279	26.3259
TTHERM_00011310	NA	NT2	25.4753	25.5326	25.5516	26.0502	25.5523	25.52	25.5147	log2.LFQ.int	0.0287623	0.0345603	26.0502	25.4753	26.0502
TTHERM_00011310	NA	NT3	25.148	25.2997	25.2798	25.6688	25.2226	25.2514	25.5095	log2.LFQ.int	0.049497	0.167599	25.6688	25.148	25.6688
TTHERM_00011310	NA	UV	25.0467	25.2214	25.4676	25.7192	25.2147	25.5819	25.477	log2.LFQ.int	0.133843	0.311381	25.7192	25.0467	25.7192
TTHERM_000113219	CAP1.TTHERM_000113219	CPT	31.1858	31.1614	31.3131	31.2731	31.3272	31.2349	31.3356	log2.LFQ.int	0.00521415	0.109767	31.3356	31.1614	31.3356
TTHERM_000113219	CAP1.TTHERM_000113219	HP	31.2946	31.1606	31.2184	30.8764	31.0248	30.9677	31.0474	log2.LFQ.int	0.0109507	0.193214	31.2946	30.8764	31.2946
TTHERM_000113219	CAP1.TTHERM_000113219	HU	31.2524	31.4011	31.3881	31.4462	31.4304	31.3443	31.3862	log2.LFQ.int	0.00437143	0.0504994	31.4462	31.2524	31.4462
TTHERM_000113219	CAP1.TTHERM_000113219	IR	31.3341	31.2671	31.2792	31.3241	31.4126	31.3718	31.5218	log2.LFQ.int	0.00661525	0.09049	31.5218	31.2671	31.5218
TTHERM_000113219	CAP1.TTHERM_000113219	MMS	31.1214	31.246	31.1852	31.297	31.3223	31.4133	31.355	log2.LFQ.int	0.00776647	0.123015	31.4133	31.1214	31.4133
TTHERM_000113219	CAP1.TTHERM_000113219	NT1	31.3315	31.2471	31.2663	31.275	31.2093	31.3044	31.2063	log2.LFQ.int	0.00333529	0.061488	31.3315	31.2063	31.3315
TTHERM_000113219	CAP1.TTHERM_000113219	NT2	31.3168	31.4285	31.3735	31.4733	31.4859	31.4761	31.4686	log2.LFQ.int	0.00366571	0.073691	31.4859	31.3168	31.4859
TTHERM_000113219	CAP1.TTHERM_000113219	NT3	31.1056	31.1943	31.0429	31.2506	31.1816	31.2382	31.1653	log2.LFQ.int	0.00490548	0.0807601	31.2506	31.0429	31.2506
TTHERM_000113219	CAP1.TTHERM_000113219	UV	31.0537	31.029	31.0745	31.0254	31.0526	31.1542	31.1439	log2.LFQ.int	0.00394454	0.068406	31.1542	31.0254	31.1542
TTHERM_00011370	NA	CPT	29.2781	29.1668	29.2574	29.4092	29.1748	29.2932	29.3497	log2.LFQ.int	0.0092108	0.105384	29.4092	29.1668	29.4092
TTHERM_00011370	NA	HP	30.067	30.2257	30.2573	30.0962	30.4209	30.579	30.5091	log2.LFQ.int	0.0166318	0.30398	30.579	30.067	30.579
TTHERM_00011370	NA	HU	28.7551	28.9002	28.8645	28.1067	29.0556	28.8534	28.953	log2.LFQ.int	0.0292947	0.122373	29.0556	28.1067	29.0556
TTHERM_00011370	NA	IR	29.1865	29.2475	29.4495	29.5788	29.569	29.3845	29.4652	log2.LFQ.int	0.0164835	0.201174	29.5788	29.1865	29.5788
TTHERM_00011370	NA	MMS	30.0339	30.1134	30.1434	30.4621	30.1138	30.1016	30.0981	log2.LFQ.int	0.0100034	0.0287248	30.4621	30.0339	30.4621
TTHERM_00011370	NA	NT1	29.7787	30.1347	30.0614	30.0176	30.2161	30.2358	30.103	log2.LFQ.int	0.0123578	0.135939	30.2358	29.7787	30.2358
TTHERM_00011370	NA	NT2	29.0076	28.9158	28.8901	28.2568	29.0048	29.0247	28.9469	log2.LFQ.int	0.0182917	0.103234	29.0247	28.2568	29.0247
TTHERM_00011370	NA	NT3	29.3556	29.1416	29.0681	27.7455	29.2875	29.2266	29.2912	log2.LFQ.int	0.0404026	0.184503	29.3556	27.7455	29.3556
TTHERM_00011370	NA	UV	29.0664	29.1371	29.3569	29.3643	29.4879	29.4792	29.5984	log2.LFQ.int	0.0202274	0.236518	29.5984	29.0664	29.5984
TTHERM_00011390	NA	CPT	26.5573	26.7198	26.412	25.8987	25.4324	25.3677	25.296	log2.LFQ.int	0.19334	1.08457	26.7198	25.296	26.7198
TTHERM_00011390	NA	HP	25.9365	26.0293	25.4716	26.2936	25.4972	25.6624	25.4724	log2.LFQ.int	0.094634	0.498099	26.2936	25.4716	26.2936
TTHERM_00011390	NA	HU	25.3777	25.5308	25.2584	26.1356	25.411	25.4076	25.3998	log2.LFQ.int	0.0924574	0.0821732	26.1356	25.2584	26.1356
TTHERM_00011390	NA	IR	26.0914	25.5967	25.4324	26.1109	25.4086	25.408	25.4417	log2.LFQ.int	0.158556	0.423515	26.1109	25.408	26.1109
TTHERM_00011390	NA	MMS	26.0918	25.6431	25.7668	26.1221	25.9144	25.5489	25.3292	log2.LFQ.int	0.118896	0.407088	26.1221	25.3292	26.1221
TTHERM_00011390	NA	NT1	25.6462	25.5633	25.6194	26.5534	25.4977	25.5688	25.6553	log2.LFQ.int	0.0807117	0.0847305	26.5534	25.4977	26.5534
TTHERM_00011390	NA	NT2	25.4747	25.5078	25.6617	26.0519	25.4705	25.375	25.5448	log2.LFQ.int	0.0392332	0.130642	26.0519	25.375	26.0519
TTHERM_00011390	NA	NT3	26.9349	26.6481	26.3237	26.063	26.6004	26.3444	26.397	log2.LFQ.int	0.0489703	0.290186	26.9349	26.063	26.9349
TTHERM_00011390	NA	UV	27.36	26.5891	26.7593	26.6169	26.5407	25.4115	25.3731	log2.LFQ.int	0.186993	0.712016	27.36	25.3731	27.36
TTHERM_00011400	BAS1.TTHERM_00011400	CPT	27.4959	27.1752	27.098	26.8222	26.99	26.5057	26.0914	log2.LFQ.int	0.093709	0.472654	27.4959	26.0914	27.4959
TTHERM_00011400	BAS1.TTHERM_00011400	HP	28.0084	27.7527	27.3696	27.4983	27.0326	27.2725	27.7197	log2.LFQ.int	0.0495756	0.41517	28.0084	27.0326	28.0084
TTHERM_00011400	BAS1.TTHERM_00011400	HU	27.5421	27.1126	27.5629	27.5347	27.5437	27.5053	27.3356	log2.LFQ.int	0.0226742	0.12247	27.5629	27.1126	27.5629
TTHERM_00011400	BAS1.TTHERM_00011400	IR	27.3304	27.378	27.41	27.1109	27.0179	27.5637	27.5143	log2.LFQ.int	0.0392062	0.241501	27.5637	27.0179	27.5637
TTHERM_00011400	BAS1.TTHERM_00011400	MMS	27.2162	27.8336	27.6082	27.4082	27.8395	27.8268	27.8156	log2.LFQ.int	0.0379837	0.321998	27.8395	27.2162	27.8395
TTHERM_00011400	BAS1.TTHERM_00011400	NT1	27.5514	27.5642	27.375	26.3479	27.3738	27.1311	27.0098	log2.LFQ.int	0.0635078	0.392754	27.5642	26.3479	27.5642
TTHERM_00011400	BAS1.TTHERM_00011400	NT2	27.5683	27.5628	27.411	27.414	27.4883	27.4585	27.5095	log2.LFQ.int	0.00746591	0.0999203	27.5683	27.411	27.5683
TTHERM_00011400	BAS1.TTHERM_00011400	NT3	27.5736	27.5003	27.4538	27.4594	27.2727	27.373	27.5277	log2.LFQ.int	0.0131263	0.100559	27.5736	27.2727	27.5736
TTHERM_00011400	BAS1.TTHERM_00011400	UV	27.2334	27.2702	27.5047	27.2862	27.436	27.4554	27.4284	log2.LFQ.int	0.0187682	0.1675	27.5047	27.2334	27.5047
TTHERM_00011440	YOL057W.TTHERM_00011440	CPT	34.3686	34.3157	34.2906	34.2559	34.263	34.3282	34.3772	log2.LFQ.int	0.00250815	0.0716066	34.3772	34.2559	34.3772
TTHERM_00011440	YOL057W.TTHERM_00011440	HP	34.1513	34.0556	34.1646	34.1597	33.9359	33.9669	33.9839	log2.LFQ.int	0.0050445	0.180096	34.1646	33.9359	34.1646
TTHERM_00011440	YOL057W.TTHERM_00011440	HU	34.4042	34.4773	34.452	34.4723	34.4207	34.426	34.4009	log2.LFQ.int	0.00158231	0.0496954	34.4773	34.4009	34.4773
TTHERM_00011440	YOL057W.TTHERM_00011440	IR	34.7049	34.7797	34.8888	34.8104	34.7564	34.6412	34.5127	log2.LFQ.int	0.00627749	0.121952	34.8888	34.5127	34.8888
TTHERM_00011440	YOL057W.TTHERM_00011440	MMS	34.1564	34.1449	34.046	34.0241	34.0912	34.0822	34.1095	log2.LFQ.int	0.0026418	0.0630236	34.1564	34.0241	34.1564
TTHERM_00011440	YOL057W.TTHERM_00011440	NT1	34.1925	34.1152	34.0683	34.0745	34.0598	34.0785	34.0089	log2.LFQ.int	0.00271814	0.0328153	34.1925	34.0089	34.1925
TTHERM_00011440	YOL057W.TTHERM_00011440	NT2	34.4139	34.4247	34.3555	34.3057	34.2726	34.2443	34.0911	log2.LFQ.int	0.0051385	0.126221	34.4247	34.0911	34.4247
TTHERM_00011440	YOL057W.TTHERM_00011440	NT3	34.4102	34.3587	34.2526	34.2548	34.1836	34.11	33.9748	log2.LFQ.int	0.00716379	0.159957	34.4102	33.9748	34.4102
TTHERM_00011440	YOL057W.TTHERM_00011440	UV	34.3957	34.4266	34.7053	34.7109	34.7112	34.6548	34.5414	log2.LFQ.int	0.00677138	0.224096	34.7112	34.3957	34.7112
TTHERM_00011449	NA	CPT	26.2682	26.0968	27.1422	27.7812	28.262	29.1086	29.9055	log2.LFQ.int	0.215581	1.98012	29.9055	26.0968	29.9055
TTHERM_00011449	NA	HP	25.9594	25.7562	25.8373	26.3746	26.1413	26.0127	26.0151	log2.LFQ.int	0.0518986	0.179848	26.3746	25.7562	26.3746
TTHERM_00011449	NA	HU	25.5616	25.5611	25.5464	26.0031	25.4526	25.412	25.3753	log2.LFQ.int	0.0688693	0.129019	26.0031	25.3753	26.0031
TTHERM_00011449	NA	IR	25.45	25.4617	25.5334	25.9557	25.5637	25.4655	25.3983	log2.LFQ.int	0.0955593	0.0927256	25.9557	25.3983	25.9557
TTHERM_00011449	NA	MMS	25.8453	25.9471	25.6424	26.2713	25.6796	25.9788	25.8993	log2.LFQ.int	0.0752331	0.20054	26.2713	25.6424	26.2713
TTHERM_00011449	NA	NT1	25.9228	25.7509	25.8814	26.3675	25.9798	25.8349	25.9354	log2.LFQ.int	0.0457285	0.0994526	26.3675	25.7509	26.3675
TTHERM_00011449	NA	NT2	25.5	25.5427	25.6133	25.9465	25.5637	25.3563	25.4615	log2.LFQ.int	0.0339699	0.107731	25.9465	25.3563	25.9465
TTHERM_00011449	NA	NT3	26.3591	26.6207	25.5799	25.6455	26.2683	25.7362	26.7477	log2.LFQ.int	0.0954643	0.799065	26.7477	25.5799	26.7477
TTHERM_00011449	NA	UV	25.6074	26.0557	26.4482	26.4679	26.5601	26.5805	26.3713	log2.LFQ.int	0.0899596	0.300475	26.5805	25.6074	26.5805
TTHERM_00011450	PUS1	CPT	29.8849	30.0745	30.198	30.2447	30.2172	29.9987	29.7989	log2.LFQ.int	0.0157214	0.265802	30.2447	29.7989	30.2447
TTHERM_00011450	PUS1	HP	30.0642	30.0777	30.021	30.2645	30.1574	30.1398	30.0849	log2.LFQ.int	0.00656884	0.0776675	30.2645	30.021	30.2645
TTHERM_00011450	PUS1	HU	29.8732	29.7866	29.8452	29.7754	29.9434	29.6464	29.6248	log2.LFQ.int	0.0108113	0.148317	29.9434	29.6248	29.9434
TTHERM_00011450	PUS1	IR	29.938	30.418	30.4716	30.3512	30.2452	29.8195	29.7806	log2.LFQ.int	0.027625	0.505803	30.4716	29.7806	30.4716
TTHERM_00011450	PUS1	MMS	30.1204	29.9405	30.099	30.0331	30.0535	29.8853	29.819	log2.LFQ.int	0.0107182	0.163355	30.1204	29.819	30.1204
TTHERM_00011450	PUS1	NT1	29.9832	29.8378	29.8613	29.8784	29.7217	29.852	29.6082	log2.LFQ.int	0.010244	0.0901217	29.9832	29.6082	29.9832
TTHERM_00011450	PUS1	NT2	29.9712	29.8587	29.8974	29.8652	29.7657	29.7647	29.5354	log2.LFQ.int	0.0100252	0.116088	29.9712	29.5354	29.9712
TTHERM_00011450	PUS1	NT3	29.9333	29.913	30.0474	30.051	29.8641	29.7642	29.7967	log2.LFQ.int	0.00916763	0.160007	30.051	29.7642	30.051
TTHERM_00011450	PUS1	UV	30.0337	30.5258	29.8986	29.8888	29.6665	29.4711	29.4931	log2.LFQ.int	0.0339599	0.386388	30.5258	29.4711	30.5258
TTHERM_00011540	SPS19.TTHERM_00011540	CPT	31.7656	31.7538	31.5339	31.3556	31.0075	30.7943	30.6579	log2.LFQ.int	0.03401	0.742927	31.7656	30.6579	31.7656
TTHERM_00011540	SPS19.TTHERM_00011540	HP	32.1544	32.0505	32.0628	31.9806	31.9026	31.7783	31.7848	log2.LFQ.int	0.00943484	0.212962	32.1544	31.7783	32.1544
TTHERM_00011540	SPS19.TTHERM_00011540	HU	31.4047	31.6114	31.562	31.8188	31.8222	31.7596	31.7035	log2.LFQ.int	0.0104618	0.202501	31.8222	31.4047	31.8222
TTHERM_00011540	SPS19.TTHERM_00011540	IR	31.4396	31.2763	31.2205	31.2855	31.3067	31.5002	31.7176	log2.LFQ.int	0.0127758	0.189003	31.7176	31.2205	31.7176
TTHERM_00011540	SPS19.TTHERM_00011540	MMS	32.0077	31.948	31.6558	31.7607	31.508	31.4658	31.6193	log2.LFQ.int	0.0149699	0.290718	32.0077	31.4658	32.0077
TTHERM_00011540	SPS19.TTHERM_00011540	NT1	32.0562	32.1368	32.1659	32.056	32.2396	32.3644	32.3933	log2.LFQ.int	0.00861054	0.205497	32.3933	32.056	32.3933
TTHERM_00011540	SPS19.TTHERM_00011540	NT2	31.519	31.5594	31.6017	31.6781	31.7341	31.7128	31.7843	log2.LFQ.int	0.00592548	0.142923	31.7843	31.519	31.7843
TTHERM_00011540	SPS19.TTHERM_00011540	NT3	31.752	31.8007	31.868	31.8933	31.9346	31.9822	31.9591	log2.LFQ.int	0.00525279	0.112561	31.9822	31.752	31.9822
TTHERM_00011540	SPS19.TTHERM_00011540	UV	31.7526	31.6805	31.661	31.6637	31.597	31.813	31.9777	log2.LFQ.int	0.0086278	0.12047	31.9777	31.597	31.9777
TTHERM_00011610	NA	CPT	25.112	25.3642	26.1897	25.8266	25.2905	26.0044	26.0555	log2.LFQ.int	0.163635	0.70259	26.1897	25.112	26.1897
TTHERM_00011610	NA	HP	26.2555	26.2897	25.8035	26.1989	25.985	26.5302	26.1084	log2.LFQ.int	0.0561495	0.225892	26.5302	25.8035	26.5302
TTHERM_00011610	NA	HU	25.5453	25.3108	25.3477	26.12	25.4408	25.3605	25.6642	log2.LFQ.int	0.0988322	0.250632	26.12	25.3108	26.12
TTHERM_00011610	NA	IR	25.4032	25.454	25.5454	26.1718	25.4137	25.7585	25.3813	log2.LFQ.int	0.148226	0.243467	26.1718	25.3813	26.1718
TTHERM_00011610	NA	MMS	25.9534	25.8818	26.2009	26.3587	26.2083	25.9877	25.9202	log2.LFQ.int	0.0581712	0.267748	26.3587	25.8818	26.3587
TTHERM_00011610	NA	NT1	26.0182	25.9142	25.9149	26.3746	26.0584	26.0062	26.026	log2.LFQ.int	0.033622	0.0816272	26.3746	25.9142	26.3746
TTHERM_00011610	NA	NT2	25.4501	25.5194	25.5672	25.9401	25.5315	25.5524	25.511	log2.LFQ.int	0.0255456	0.0446205	25.9401	25.4501	25.9401
TTHERM_00011610	NA	NT3	26.1412	25.5554	25.9618	25.6965	25.8416	26.1922	26.0017	log2.LFQ.int	0.0508836	0.302432	26.1922	25.5554	26.1922
TTHERM_00011610	NA	UV	25.7728	26.1768	26.0066	25.9707	26.1229	26.6854	26.3533	log2.LFQ.int	0.0890938	0.276432	26.6854	25.7728	26.6854
TTHERM_00011670	CDK3	CPT	27.1028	27.5895	27.538	27.4802	27.0855	27.3984	27.3614	log2.LFQ.int	0.0337938	0.277047	27.5895	27.0855	27.5895
TTHERM_00011670	CDK3	HP	26.0575	25.63	25.9181	26.2044	26.062	25.9759	25.8557	log2.LFQ.int	0.0482418	0.172828	26.2044	25.63	26.2044
TTHERM_00011670	CDK3	HU	27.1441	26.4811	26.8683	26.7507	26.5603	26.8098	26.8272	log2.LFQ.int	0.0424845	0.192237	27.1441	26.4811	27.1441
TTHERM_00011670	CDK3	IR	26.9625	26.9112	26.3281	26.4043	26.9831	26.5844	26.1638	log2.LFQ.int	0.0902374	0.57066	26.9831	26.1638	26.9831
TTHERM_00011670	CDK3	MMS	25.9841	25.9012	26.4558	26.23	26.6792	26.8447	26.7662	log2.LFQ.int	0.10311	0.615598	26.8447	25.9012	26.8447
TTHERM_00011670	CDK3	NT1	25.8771	25.9914	25.8418	26.4732	25.9348	26.0415	26.1727	log2.LFQ.int	0.0515511	0.201135	26.4732	25.8418	26.4732
TTHERM_00011670	CDK3	NT2	25.5986	26.2409	26.4344	26.0916	25.5516	25.6157	26.2701	log2.LFQ.int	0.0634203	0.648387	26.4344	25.5516	26.4344
TTHERM_00011670	CDK3	NT3	26.2175	26.3753	26.797	25.9645	26.4309	25.2685	26.7309	log2.LFQ.int	0.0951396	0.489868	26.797	25.2685	26.797
TTHERM_00011670	CDK3	UV	27.2036	27.122	26.6299	27.1057	26.6987	26.8559	27.1861	log2.LFQ.int	0.048375	0.376733	27.2036	26.6299	27.2036
TTHERM_00011710	CTH2	CPT	26.2468	26.0681	26.8825	26.6916	26.8232	26.1038	26.2058	log2.LFQ.int	0.0853991	0.602654	26.8825	26.0681	26.8825
TTHERM_00011710	CTH2	HP	25.9604	25.9239	25.7924	26.2172	25.9761	26.0792	26.1027	log2.LFQ.int	0.0361876	0.14879	26.2172	25.7924	26.2172
TTHERM_00011710	CTH2	HU	26.6701	26.8339	27.0152	26.2327	27.0127	27.0113	27.1438	log2.LFQ.int	0.0555963	0.26194	27.1438	26.2327	27.1438
TTHERM_00011710	CTH2	IR	27.3799	27.1823	26.9111	26.3791	26.07	26.3951	26.8849	log2.LFQ.int	0.121183	0.659566	27.3799	26.07	27.3799
TTHERM_00011710	CTH2	MMS	25.7708	25.9114	25.7223	26.4338	25.9696	25.9936	25.8854	log2.LFQ.int	0.0742876	0.153511	26.4338	25.7223	26.4338
TTHERM_00011710	CTH2	NT1	25.5785	25.9924	25.8127	26.4617	25.9407	25.9861	25.9822	log2.LFQ.int	0.0632937	0.112574	26.4617	25.5785	26.4617
TTHERM_00011710	CTH2	NT2	26.7368	27.0406	27.1293	26.8164	27.3463	27.5369	27.467	log2.LFQ.int	0.0393838	0.478149	27.5369	26.7368	27.5369
TTHERM_00011710	CTH2	NT3	26.7606	26.7292	26.8609	26.9558	26.7291	27.0849	27.1857	log2.LFQ.int	0.0276372	0.275491	27.1857	26.7291	27.1857
TTHERM_00011710	CTH2	UV	26.2756	26.7819	26.3626	26.6036	25.9695	26.3202	26.6475	log2.LFQ.int	0.0724965	0.327653	26.7819	25.9695	26.7819
TTHERM_00011730	MRF1.TTHERM_00011730	CPT	27.1931	27.0354	26.5297	25.7395	26.574	26.0988	26.7386	log2.LFQ.int	0.118759	0.572757	27.1931	25.7395	27.1931
TTHERM_00011730	MRF1.TTHERM_00011730	HP	26.9174	26.9863	25.8214	26.0944	26.024	26.0756	26.2219	log2.LFQ.int	0.0974602	0.519876	26.9863	25.8214	26.9863
TTHERM_00011730	MRF1.TTHERM_00011730	HU	27.8895	27.6235	27.5481	27.2947	27.363	27.2692	27.2385	log2.LFQ.int	0.0364966	0.303842	27.8895	27.2385	27.8895
TTHERM_00011730	MRF1.TTHERM_00011730	IR	27.5738	27.7112	27.905	28.0496	28.0749	27.7898	27.6968	log2.LFQ.int	0.0313938	0.273271	28.0749	27.5738	28.0749
TTHERM_00011730	MRF1.TTHERM_00011730	MMS	25.9373	25.951	27.0531	26.3433	26.6458	26.6544	26.0774	log2.LFQ.int	0.115004	0.635875	27.0531	25.9373	27.0531
TTHERM_00011730	MRF1.TTHERM_00011730	NT1	25.8535	26.3414	25.912	26.3628	25.8987	25.858	26.0532	log2.LFQ.int	0.0528839	0.318953	26.3628	25.8535	26.3628
TTHERM_00011730	MRF1.TTHERM_00011730	NT2	27.84	27.6076	27.7405	27.3513	27.583	27.3747	27.3809	log2.LFQ.int	0.0217337	0.296315	27.84	27.3513	27.84
TTHERM_00011730	MRF1.TTHERM_00011730	NT3	27.3435	27.2229	27.3158	27.1572	27.128	27.1727	26.9228	log2.LFQ.int	0.0190945	0.126799	27.3435	26.9228	27.3435
TTHERM_00011730	MRF1.TTHERM_00011730	UV	27.076	27.2353	27.5112	27.7372	27.81	27.9446	27.9809	log2.LFQ.int	0.057591	0.504038	27.9809	27.076	27.9809
TTHERM_00011760	RPC19	CPT	27.0489	27.4098	27.3944	27.4322	27.3308	27.335	27.3308	log2.LFQ.int	0.018773	0.071272	27.4322	27.0489	27.4322
TTHERM_00011760	RPC19	HP	27.3215	27.1576	27.3744	27.313	27.3518	27.2198	27.5782	log2.LFQ.int	0.0199182	0.0966643	27.5782	27.1576	27.5782
TTHERM_00011760	RPC19	HU	28.213	28.0229	27.8856	27.7868	27.6551	27.7267	27.5241	log2.LFQ.int	0.0333018	0.26337	28.213	27.5241	28.213
TTHERM_00011760	RPC19	IR	28.4179	28.4292	28.4208	28.6148	28.4791	28.1541	27.8375	log2.LFQ.int	0.0336458	0.168209	28.6148	27.8375	28.6148
TTHERM_00011760	RPC19	MMS	26.601	27.0506	27.0569	26.9181	27.0443	26.9206	26.6346	log2.LFQ.int	0.0395879	0.271077	27.0569	26.601	27.0569
TTHERM_00011760	RPC19	NT1	27.5233	27.1125	27.2378	26.8665	27.0911	26.9356	26.33	log2.LFQ.int	0.0608406	0.274124	27.5233	26.33	27.5233
TTHERM_00011760	RPC19	NT2	28.2393	28.1137	28.1843	28.1377	27.9632	27.865	27.7829	log2.LFQ.int	0.0176747	0.246928	28.2393	27.7829	28.2393
TTHERM_00011760	RPC19	NT3	27.462	27.712	27.8318	27.5727	27.5426	27.5808	27.4626	log2.LFQ.int	0.0165693	0.143839	27.8318	27.462	27.8318
TTHERM_00011760	RPC19	UV	27.7784	27.7542	27.7685	27.9576	27.7633	27.4666	26.7861	log2.LFQ.int	0.0540087	0.163037	27.9576	26.7861	27.9576
TTHERM_00011770	NA	CPT	25.1517	25.3778	25.5331	25.8383	25.8884	25.9405	25.9403	log2.LFQ.int	0.118663	0.458876	25.9405	25.1517	25.9405
TTHERM_00011770	NA	HP	26.0858	25.7937	25.7347	26.5173	25.9947	26.087	25.9183	log2.LFQ.int	0.0637465	0.230369	26.5173	25.7347	26.5173
TTHERM_00011770	NA	HU	25.6643	25.5616	25.3896	26.0664	25.7441	25.4977	25.5487	log2.LFQ.int	0.0749059	0.180996	26.0664	25.3896	26.0664
TTHERM_00011770	NA	IR	25.6373	25.7802	25.633	26.1265	25.7219	25.3553	25.7045	log2.LFQ.int	0.109505	0.115833	26.1265	25.3553	26.1265
TTHERM_00011770	NA	MMS	26.0729	26.0106	25.8628	26.4175	25.969	25.9721	26.1179	log2.LFQ.int	0.0536572	0.12489	26.4175	25.8628	26.4175
TTHERM_00011770	NA	NT1	25.9128	25.9813	25.8166	26.2478	25.9765	25.9273	25.9405	log2.LFQ.int	0.0305606	0.0588792	26.2478	25.8166	26.2478
TTHERM_00011770	NA	NT2	25.5577	25.4622	25.4689	26.0427	25.5916	25.4344	25.4528	log2.LFQ.int	0.0348752	0.117119	26.0427	25.4344	26.0427
TTHERM_00011770	NA	NT3	25.1121	25.1729	25.3726	25.8173	25.078	25.4397	25.3246	log2.LFQ.int	0.0699749	0.263654	25.8173	25.078	25.8173
TTHERM_00011770	NA	UV	25.225	25.2208	25.2785	25.8431	25.4265	25.3054	25.4704	log2.LFQ.int	0.110802	0.196673	25.8431	25.2208	25.8431
TTHERM_00011880	NA	CPT	27.4599	27.3333	26.9609	26.4112	26.7059	26.9787	26.9828	log2.LFQ.int	0.0685909	0.324699	27.4599	26.4112	27.4599
TTHERM_00011880	NA	HP	27.5722	27.5045	27.7195	27.4713	27.4325	27.5143	27.1396	log2.LFQ.int	0.0244219	0.0913674	27.7195	27.1396	27.7195
TTHERM_00011880	NA	HU	27.632	27.2566	26.5508	26.7484	26.5921	26.7332	26.5308	log2.LFQ.int	0.0746836	0.430998	27.632	26.5308	27.632
TTHERM_00011880	NA	IR	25.2926	26.5826	26.6215	27.1838	27.211	27.1604	27.8431	log2.LFQ.int	0.180853	0.595365	27.8431	25.2926	27.8431
TTHERM_00011880	NA	MMS	27.291	25.865	26.1322	26.4553	26.2293	25.8624	26.0631	log2.LFQ.int	0.129169	0.378259	27.291	25.8624	27.291
TTHERM_00011880	NA	NT1	26.9532	27.1113	27.4554	27.0032	26.8587	27.2038	26.9638	log2.LFQ.int	0.032285	0.19909	27.4554	26.8587	27.4554
TTHERM_00011880	NA	NT2	26.483	27.1142	27.8379	27.4255	26.693	27.0059	26.7226	log2.LFQ.int	0.0598243	0.562038	27.8379	26.483	27.8379
TTHERM_00011880	NA	NT3	27.3869	27.5346	26.9139	26.9531	27.3651	27.3989	27.5191	log2.LFQ.int	0.0328924	0.299889	27.5346	26.9139	27.5346
TTHERM_00011880	NA	UV	27.2586	27.3534	26.8653	26.3422	26.714	27.2324	27.3356	log2.LFQ.int	0.0749888	0.507443	27.3534	26.3422	27.3534
TTHERM_000128319	GDB1.TTHERM_000128319	CPT	33.8298	33.7859	33.7267	33.6879	33.5911	33.4825	33.3446	log2.LFQ.int	0.00965594	0.219504	33.8298	33.3446	33.8298
TTHERM_000128319	GDB1.TTHERM_000128319	HP	33.9559	34.0246	33.9938	34.1158	33.8196	33.7815	33.7151	log2.LFQ.int	0.00769145	0.208656	34.1158	33.7151	34.1158
TTHERM_000128319	GDB1.TTHERM_000128319	HU	33.7712	33.8279	33.9275	33.9772	33.969	34.0424	34.103	log2.LFQ.int	0.0061747	0.132099	34.103	33.7712	34.103
TTHERM_000128319	GDB1.TTHERM_000128319	IR	33.5423	33.4807	33.4377	33.386	33.4278	33.5499	33.6771	log2.LFQ.int	0.00567103	0.113315	33.6771	33.386	33.6771
TTHERM_000128319	GDB1.TTHERM_000128319	MMS	33.9499	34.1315	34.1901	34.2517	34.1234	34.1913	34.1735	log2.LFQ.int	0.00464994	0.063266	34.2517	33.9499	34.2517
TTHERM_000128319	GDB1.TTHERM_000128319	NT1	33.9816	34.0381	34.0558	34.0401	34.0953	34.1712	34.2857	log2.LFQ.int	0.00498557	0.0941551	34.2857	33.9816	34.2857
TTHERM_000128319	GDB1.TTHERM_000128319	NT2	33.7479	33.8342	33.8252	33.8833	33.9028	33.9612	34.0269	log2.LFQ.int	0.0044164	0.102278	34.0269	33.7479	34.0269
TTHERM_000128319	GDB1.TTHERM_000128319	NT3	33.9279	33.8679	33.8145	33.8786	33.8335	33.9116	33.9994	log2.LFQ.int	0.00310318	0.0690882	33.9994	33.8145	33.9994
TTHERM_000128319	GDB1.TTHERM_000128319	UV	33.7394	33.6361	33.5884	33.602	33.6425	33.7519	33.7774	log2.LFQ.int	0.00430136	0.12658	33.7774	33.5884	33.7774
TTHERM_000128859	NA	CPT	29.188	29.3316	29.3235	29.3834	29.3241	29.3272	29.3289	log2.LFQ.int	0.00498564	0.00646532	29.3834	29.188	29.3834
TTHERM_000128859	NA	HP	29.4105	29.4496	29.3016	29.4577	29.4094	29.3129	29.2957	log2.LFQ.int	0.00671909	0.122829	29.4577	29.2957	29.4577
TTHERM_000128859	NA	HU	29.3161	29.3624	29.1819	29.3203	29.2177	29.2539	29.2887	log2.LFQ.int	0.00650666	0.082446	29.3624	29.1819	29.3624
TTHERM_000128859	NA	IR	29.3576	29.2156	29.1383	29.3359	29.3084	29.232	29.2858	log2.LFQ.int	0.00872106	0.0983621	29.3576	29.1383	29.3576
TTHERM_000128859	NA	MMS	29.6159	29.7123	29.6934	29.6007	29.8319	29.782	29.7883	log2.LFQ.int	0.00880116	0.130482	29.8319	29.6007	29.8319
TTHERM_000128859	NA	NT1	29.4801	29.3941	29.453	29.4545	29.4218	29.4489	29.4473	log2.LFQ.int	0.00246636	0.0192007	29.4801	29.3941	29.4801
TTHERM_000128859	NA	NT2	29.3305	29.1802	29.1908	29.4172	29.2389	29.3276	29.3302	log2.LFQ.int	0.00702167	0.115486	29.4172	29.1802	29.4172
TTHERM_000128859	NA	NT3	29.3138	29.3117	29.2315	29.3095	29.2819	29.2247	29.2853	log2.LFQ.int	0.00323513	0.0538723	29.3138	29.2247	29.3138
TTHERM_000128859	NA	UV	29.2199	29.2005	29.1018	29.1241	29.1621	29.2145	29.2051	log2.LFQ.int	0.00501949	0.066727	29.2199	29.1018	29.2199
TTHERM_000129647	NA	CPT	28.4722	28.6713	28.715	28.4837	28.6718	28.6368	28.7204	log2.LFQ.int	0.0118464	0.133142	28.7204	28.4722	28.7204
TTHERM_000129647	NA	HP	26.7238	27.6849	28.3675	27.5999	27.7465	28.2548	28.0906	log2.LFQ.int	0.0723729	0.53027	28.3675	26.7238	28.3675
TTHERM_000129647	NA	HU	29.0878	29.0591	29.0146	28.979	28.8182	28.9242	29.1184	log2.LFQ.int	0.0111246	0.121859	29.1184	28.8182	29.1184
TTHERM_000129647	NA	IR	28.9636	29.1596	29.2308	29.4154	29.4972	29.2607	29.0324	log2.LFQ.int	0.0222929	0.242002	29.4972	28.9636	29.4972
TTHERM_000129647	NA	MMS	27.6264	27.6318	27.5826	27.3884	27.6955	28.2712	27.7602	log2.LFQ.int	0.0389879	0.123391	28.2712	27.3884	28.2712
TTHERM_000129647	NA	NT1	27.6314	27.6159	27.6752	26.3919	27.3613	27.5503	27.1414	log2.LFQ.int	0.0620796	0.372274	27.6752	26.3919	27.6752
TTHERM_000129647	NA	NT2	28.9795	29.2569	29.1197	29.3204	29.1679	28.8785	28.7299	log2.LFQ.int	0.0182856	0.283393	29.3204	28.7299	29.3204
TTHERM_000129647	NA	NT3	28.5355	28.3876	28.4334	28.598	28.471	28.3074	28.0484	log2.LFQ.int	0.0183861	0.155773	28.598	28.0484	28.598
TTHERM_000129647	NA	UV	28.3698	28.2155	28.2672	28.0402	28.1941	28.0468	27.8739	log2.LFQ.int	0.0234619	0.197849	28.3698	27.8739	28.3698
TTHERM_00012980	ATG10	CPT	29.2517	29.5795	29.8382	29.909	29.8047	29.7488	29.9352	log2.LFQ.int	0.0212342	0.209466	29.9352	29.2517	29.9352
TTHERM_00012980	ATG10	HP	29.8228	29.9111	30.0397	29.8448	30.1639	30.2232	30.0443	log2.LFQ.int	0.0134777	0.226191	30.2232	29.8228	30.2232
TTHERM_00012980	ATG10	HU	29.0154	29.2243	29.2724	29.4294	29.3438	29.4573	29.4867	log2.LFQ.int	0.0162495	0.19503	29.4867	29.0154	29.4867
TTHERM_00012980	ATG10	IR	29.0795	29.1923	29.1165	28.9863	29.0787	29.2194	29.1678	log2.LFQ.int	0.00938033	0.100988	29.2194	28.9863	29.2194
TTHERM_00012980	ATG10	MMS	29.8573	29.8751	29.7133	30.092	30.0313	30.2779	30.1238	log2.LFQ.int	0.0181199	0.241673	30.2779	29.7133	30.2779
TTHERM_00012980	ATG10	NT1	29.665	29.9409	29.8093	29.9476	29.9259	29.661	29.7829	log2.LFQ.int	0.010895	0.209459	29.9476	29.661	29.9476
TTHERM_00012980	ATG10	NT2	28.9537	29.0904	29.2025	29.2252	29.244	29.2903	29.2167	log2.LFQ.int	0.00885812	0.0882392	29.2903	28.9537	29.2903
TTHERM_00012980	ATG10	NT3	29.2607	29.0183	29.1474	29.1245	29.2466	29.3254	29.2939	log2.LFQ.int	0.00989856	0.141377	29.3254	29.0183	29.3254
TTHERM_00012980	ATG10	UV	29.5106	29.4888	29.3985	29.4722	29.4376	29.5673	29.346	log2.LFQ.int	0.00768614	0.0816785	29.5673	29.346	29.5673
TTHERM_00013070	NA	CPT	32.6206	32.5909	32.6246	32.6217	32.5708	32.539	32.4612	log2.LFQ.int	0.00349763	0.0662717	32.6246	32.4612	32.6246
TTHERM_00013070	NA	HP	32.7078	32.7579	32.7152	32.8197	32.7377	32.7825	32.8428	log2.LFQ.int	0.00308042	0.0747222	32.8428	32.7078	32.8428
TTHERM_00013070	NA	HU	32.84	32.7532	32.6815	32.6695	32.5429	32.493	32.4393	log2.LFQ.int	0.00901028	0.1994	32.84	32.4393	32.84
TTHERM_00013070	NA	IR	32.7405	32.8002	32.8881	33.0658	33.077	32.8925	32.7369	log2.LFQ.int	0.0087982	0.208836	33.077	32.7369	33.077
TTHERM_00013070	NA	MMS	32.7167	32.6989	32.7421	32.6843	32.7666	32.7683	32.714	log2.LFQ.int	0.0020591	0.0479023	32.7683	32.6843	32.7683
TTHERM_00013070	NA	NT1	32.7298	32.7163	32.6915	32.6652	32.6548	32.6152	32.4975	log2.LFQ.int	0.00441207	0.0689366	32.7298	32.4975	32.7298
TTHERM_00013070	NA	NT2	32.7758	32.7488	32.7575	32.7167	32.6174	32.5494	32.5406	log2.LFQ.int	0.00528865	0.169774	32.7758	32.5406	32.7758
TTHERM_00013070	NA	NT3	32.7108	32.6613	32.626	32.7319	32.583	32.5308	32.4893	log2.LFQ.int	0.00524271	0.129168	32.7319	32.4893	32.7319
TTHERM_00013070	NA	UV	32.6516	32.6494	32.7028	32.7847	32.7501	32.5937	32.4874	log2.LFQ.int	0.0062703	0.104837	32.7847	32.4874	32.7847
TTHERM_00013100	JAC1.TTHERM_00013100	CPT	25.3412	25.2993	25.3513	25.8465	25.2199	25.2433	25.1826	log2.LFQ.int	0.0949875	0.114628	25.8465	25.1826	25.8465
TTHERM_00013100	JAC1.TTHERM_00013100	HP	25.9079	26.1219	26.1932	25.8994	26.0236	26.1416	26.2401	log2.LFQ.int	0.0341773	0.201626	26.2401	25.8994	26.2401
TTHERM_00013100	JAC1.TTHERM_00013100	HU	25.3738	25.5274	25.4083	26.0274	25.5018	25.4794	25.4577	log2.LFQ.int	0.0684123	0.0816423	26.0274	25.3738	26.0274
TTHERM_00013100	JAC1.TTHERM_00013100	IR	25.4256	25.4131	25.6282	25.9976	25.5553	25.4973	25.4134	log2.LFQ.int	0.110181	0.172175	25.9976	25.4131	25.9976
TTHERM_00013100	JAC1.TTHERM_00013100	MMS	26.0678	26.1129	26.2963	25.7989	25.8289	25.7739	26.1194	log2.LFQ.int	0.0674348	0.302204	26.2963	25.7739	26.2963
TTHERM_00013100	JAC1.TTHERM_00013100	NT1	26.4875	26.4672	26.6698	26.2094	26.231	26.8304	26.5397	log2.LFQ.int	0.0460109	0.255625	26.8304	26.2094	26.8304
TTHERM_00013100	JAC1.TTHERM_00013100	NT2	25.5602	25.5675	25.4874	25.9624	25.4826	25.4233	25.4004	log2.LFQ.int	0.0327895	0.110914	25.9624	25.4004	25.9624
TTHERM_00013100	JAC1.TTHERM_00013100	NT3	25.214	27.1722	27.3596	25.8586	26.9373	27.1367	26.8788	log2.LFQ.int	0.122247	0.785785	27.3596	25.214	27.3596
TTHERM_00013100	JAC1.TTHERM_00013100	UV	25.3022	25.4202	25.5379	25.9917	25.4331	25.4141	25.5147	log2.LFQ.int	0.0942717	0.109131	25.9917	25.3022	25.9917
TTHERM_00013110	KAP95.TTHERM_00013110	CPT	32.2647	32.4658	32.6115	32.7546	32.8695	32.9679	33.0747	log2.LFQ.int	0.0180011	0.380021	33.0747	32.2647	33.0747
TTHERM_00013110	KAP95.TTHERM_00013110	HP	32.3785	32.3556	32.3388	32.471	32.2413	32.2792	32.433	log2.LFQ.int	0.00508281	0.0967518	32.471	32.2413	32.471
TTHERM_00013110	KAP95.TTHERM_00013110	HU	32.6313	32.505	32.4461	32.5056	32.4568	32.48	32.4817	log2.LFQ.int	0.00333507	0.0369147	32.6313	32.4461	32.6313
TTHERM_00013110	KAP95.TTHERM_00013110	IR	32.5862	32.8176	32.7988	32.8777	32.7478	32.6407	32.5568	log2.LFQ.int	0.00806537	0.194706	32.8777	32.5568	32.8777
TTHERM_00013110	KAP95.TTHERM_00013110	MMS	32.2975	32.3231	32.2884	32.3554	32.358	32.3895	32.4374	log2.LFQ.int	0.00346001	0.0634915	32.4374	32.2884	32.4374
TTHERM_00013110	KAP95.TTHERM_00013110	NT1	32.4439	32.3158	32.3617	32.3192	32.3937	32.2963	32.2414	log2.LFQ.int	0.00414788	0.0716072	32.4439	32.2414	32.4439
TTHERM_00013110	KAP95.TTHERM_00013110	NT2	32.6143	32.5474	32.6066	32.6557	32.5623	32.4858	32.4545	log2.LFQ.int	0.00392745	0.0938732	32.6557	32.4545	32.6557
TTHERM_00013110	KAP95.TTHERM_00013110	NT3	32.327	32.3354	32.4111	32.4604	32.3989	32.3608	32.3064	log2.LFQ.int	0.00320499	0.0737643	32.4604	32.3064	32.4604
TTHERM_00013110	KAP95.TTHERM_00013110	UV	32.3431	32.4836	32.6324	32.6393	32.5622	32.5317	32.4617	log2.LFQ.int	0.00663522	0.124651	32.6393	32.3431	32.6393
TTHERM_00013120	PAT1	CPT	26.9734	26.8635	26.9057	26.691	27.1821	27.2871	27.6841	log2.LFQ.int	0.0611228	0.349993	27.6841	26.691	27.6841
TTHERM_00013120	PAT1	HP	26.0611	26.5869	26.0916	26.3173	25.8411	26.0785	26.3192	log2.LFQ.int	0.0567426	0.248441	26.5869	25.8411	26.5869
TTHERM_00013120	PAT1	HU	27.0602	26.0432	26.3408	26.4442	26.9413	27.065	26.8004	log2.LFQ.int	0.0826601	0.608261	27.065	26.0432	27.065
TTHERM_00013120	PAT1	IR	26.9773	27.0153	27.0146	26.9702	27.0043	26.99	26.6753	log2.LFQ.int	0.0206491	0.0357046	27.0153	26.6753	27.0153
TTHERM_00013120	PAT1	MMS	25.8267	26.0525	26.4128	26.7122	26.1162	26.558	26.6965	log2.LFQ.int	0.0968804	0.542862	26.7122	25.8267	26.7122
TTHERM_00013120	PAT1	NT1	25.8479	26.1049	25.8703	26.546	25.884	26.251	26.2369	log2.LFQ.int	0.0620545	0.366791	26.546	25.8479	26.546
TTHERM_00013120	PAT1	NT2	27.0898	26.3266	26.7781	26.3546	26.8164	26.4523	26.8998	log2.LFQ.int	0.0416017	0.454673	27.0898	26.3266	27.0898
TTHERM_00013120	PAT1	NT3	26.2869	26.4941	26.6617	26.6532	26.8989	26.0758	26.0939	log2.LFQ.int	0.055635	0.467071	26.8989	26.0758	26.8989
TTHERM_00013120	PAT1	UV	26.1718	27.2556	27.3466	27.5468	27.2869	27.5573	27.4583	log2.LFQ.int	0.072631	0.231295	27.5573	26.1718	27.5573
TTHERM_000131239	PMT2.TTHERM_000131239	CPT	30.023	30.2584	30.2657	30.2267	30.2939	30.2277	30.1147	log2.LFQ.int	0.00799065	0.091388	30.2939	30.023	30.2939
TTHERM_000131239	PMT2.TTHERM_000131239	HP	30.2006	30.1177	30.0747	30.045	30.1666	30.2256	30.045	log2.LFQ.int	0.00632966	0.123743	30.2256	30.045	30.2256
TTHERM_000131239	PMT2.TTHERM_000131239	HU	29.813	29.9217	29.6856	30.0122	30.0964	30.0745	30.2118	log2.LFQ.int	0.0162508	0.218134	30.2118	29.6856	30.2118
TTHERM_000131239	PMT2.TTHERM_000131239	IR	29.7584	29.6357	29.785	29.755	29.6997	29.89	29.9199	log2.LFQ.int	0.0101641	0.110108	29.9199	29.6357	29.9199
TTHERM_000131239	PMT2.TTHERM_000131239	MMS	30.1952	30.0702	30.1808	30.3965	30.1439	30.1526	30.091	log2.LFQ.int	0.00879089	0.0705748	30.3965	30.0702	30.3965
TTHERM_000131239	PMT2.TTHERM_000131239	NT1	29.845	29.8372	30.065	30.2286	30.0973	30.033	30.1591	log2.LFQ.int	0.0126095	0.189161	30.2286	29.8372	30.2286
TTHERM_000131239	PMT2.TTHERM_000131239	NT2	30.0633	29.9579	29.9214	29.9048	29.9023	29.9561	30.0401	log2.LFQ.int	0.00463004	0.0858716	30.0633	29.9023	30.0633
TTHERM_000131239	PMT2.TTHERM_000131239	NT3	30.0104	30.0718	30.1332	30.1969	30.1971	30.3677	30.0919	log2.LFQ.int	0.0088096	0.115155	30.3677	30.0104	30.3677
TTHERM_000131239	PMT2.TTHERM_000131239	UV	29.9741	29.9253	30.0383	30.0333	30.2386	30.1621	30.1691	log2.LFQ.int	0.0106222	0.161916	30.2386	29.9253	30.2386
TTHERM_000131339	SLC1.TTHERM_000131339	CPT	28.8801	29.1132	29.1611	29.2382	29.2268	29.1841	29.1766	log2.LFQ.int	0.0112737	0.0683734	29.2382	28.8801	29.2382
TTHERM_000131339	SLC1.TTHERM_000131339	HP	29.6354	29.6624	29.7545	29.7165	29.7727	29.7198	29.7028	log2.LFQ.int	0.00440632	0.0544974	29.7727	29.6354	29.7727
TTHERM_000131339	SLC1.TTHERM_000131339	HU	28.9284	29.0905	29.1509	29.1717	29.1658	29.2118	29.2759	log2.LFQ.int	0.0107874	0.0710189	29.2759	28.9284	29.2759
TTHERM_000131339	SLC1.TTHERM_000131339	IR	28.964	29.0892	29.0293	29.1854	29.223	29.2953	29.3355	log2.LFQ.int	0.016308	0.19988	29.3355	28.964	29.3355
TTHERM_000131339	SLC1.TTHERM_000131339	MMS	29.5196	29.5314	29.4309	29.5526	29.4499	29.5	29.3389	log2.LFQ.int	0.00747016	0.0851184	29.5526	29.3389	29.5526
TTHERM_000131339	SLC1.TTHERM_000131339	NT1	29.544	29.5549	29.5655	29.6252	29.679	29.7379	29.7851	log2.LFQ.int	0.00869363	0.148247	29.7851	29.544	29.7851
TTHERM_000131339	SLC1.TTHERM_000131339	NT2	29.0304	29.1642	29.0614	29.292	29.2266	29.2307	29.2579	log2.LFQ.int	0.00821896	0.13149	29.292	29.0304	29.292
TTHERM_000131339	SLC1.TTHERM_000131339	NT3	29.0472	29.156	29.038	29.1627	29.131	29.0625	29.1588	log2.LFQ.int	0.00506447	0.102576	29.1627	29.038	29.1627
TTHERM_000131339	SLC1.TTHERM_000131339	UV	28.9172	28.9284	28.9104	29.1113	29.2379	29.3039	29.2544	log2.LFQ.int	0.0191125	0.323287	29.3039	28.9104	29.3039
TTHERM_00013140	CYC8.TTHERM_00013140	CPT	25.2801	25.2477	25.2934	25.8698	25.2635	25.8245	26.4509	log2.LFQ.int	0.173816	0.57534	26.4509	25.2477	26.4509
TTHERM_00013140	CYC8.TTHERM_00013140	HP	26.5083	26.5114	25.8771	26.2821	27.1731	27.3332	26.9915	log2.LFQ.int	0.102736	0.6871	27.3332	25.8771	27.3332
TTHERM_00013140	CYC8.TTHERM_00013140	HU	25.5674	25.3375	25.356	26.0642	25.4663	25.4631	25.4567	log2.LFQ.int	0.0802294	0.110456	26.0642	25.3375	26.0642
TTHERM_00013140	CYC8.TTHERM_00013140	IR	25.4883	25.511	25.5943	26.0453	25.4017	25.2997	25.4369	log2.LFQ.int	0.131822	0.133357	26.0453	25.2997	26.0453
TTHERM_00013140	CYC8.TTHERM_00013140	MMS	25.9802	25.8828	25.792	26.2177	25.9551	25.9668	25.9435	log2.LFQ.int	0.0414741	0.0603382	26.2177	25.792	26.2177
TTHERM_00013140	CYC8.TTHERM_00013140	NT1	26.0249	25.8918	25.8892	26.5394	25.8882	25.9242	25.9608	log2.LFQ.int	0.046316	0.102355	26.5394	25.8882	26.5394
TTHERM_00013140	CYC8.TTHERM_00013140	NT2	25.476	25.4836	25.4116	25.7795	25.4381	25.4814	26.1178	log2.LFQ.int	0.0441386	0.174566	26.1178	25.4116	26.1178
TTHERM_00013140	CYC8.TTHERM_00013140	NT3	25.2231	25.1253	25.3128	25.7351	25.3252	25.2368	25.3966	log2.LFQ.int	0.0514223	0.130993	25.7351	25.1253	25.7351
TTHERM_00013140	CYC8.TTHERM_00013140	UV	26.228	26.2382	26.7816	26.7356	27.3596	27.953	28.165	log2.LFQ.int	0.15526	1.1694	28.165	26.228	28.165
TTHERM_00013170	DIP2.TTHERM_00013170	CPT	28.0301	27.2673	27.767	27.2115	27.6391	27.5554	27.548	log2.LFQ.int	0.0448162	0.295432	28.0301	27.2115	28.0301
TTHERM_00013170	DIP2.TTHERM_00013170	HP	27.2895	26.4876	26.9687	26.7254	27.0205	26.8296	26.5439	log2.LFQ.int	0.0524131	0.359944	27.2895	26.4876	27.2895
TTHERM_00013170	DIP2.TTHERM_00013170	HU	26.9647	26.7157	27.046	26.9668	27.0245	27.011	27.0213	log2.LFQ.int	0.017205	0.0571156	27.046	26.7157	27.046
TTHERM_00013170	DIP2.TTHERM_00013170	IR	26.8745	26.5511	26.8068	26.6621	26.9415	26.9485	26.1491	log2.LFQ.int	0.0692066	0.301368	26.9485	26.1491	26.9485
TTHERM_00013170	DIP2.TTHERM_00013170	MMS	26.3438	27.2109	26.5872	26.5494	26.3976	26.4699	26.14	log2.LFQ.int	0.0771625	0.197587	27.2109	26.14	27.2109
TTHERM_00013170	DIP2.TTHERM_00013170	NT1	27.152	26.5835	26.9827	26.9005	27.1758	27.4073	27.4237	log2.LFQ.int	0.0491741	0.34998	27.4237	26.5835	27.4237
TTHERM_00013170	DIP2.TTHERM_00013170	NT2	26.8238	27.0688	26.9655	27.1127	26.6698	26.6913	26.9831	log2.LFQ.int	0.0234664	0.268442	27.1127	26.6698	27.1127
TTHERM_00013170	DIP2.TTHERM_00013170	NT3	28.0998	27.752	27.959	27.7667	27.9256	28.0941	27.9875	log2.LFQ.int	0.0163183	0.19465	28.0998	27.752	28.0998
TTHERM_00013170	DIP2.TTHERM_00013170	UV	28.066	27.2429	27.9069	27.4743	27.5429	27.7699	27.9609	log2.LFQ.int	0.0480056	0.425308	28.066	27.2429	28.066
TTHERM_00013230	NA	CPT	25.2693	25.4605	25.3097	25.746	25.3252	25.365	25.3549	log2.LFQ.int	0.06819	0.0953401	25.746	25.2693	25.746
TTHERM_00013230	NA	HP	26.0123	25.8371	25.7113	26.3971	25.8874	25.9777	26.1117	log2.LFQ.int	0.0569381	0.199738	26.3971	25.7113	26.3971
TTHERM_00013230	NA	HU	25.4702	25.5435	25.6055	26.104	25.3234	25.5217	25.3488	log2.LFQ.int	0.0879945	0.165015	26.104	25.3234	26.104
TTHERM_00013230	NA	IR	25.8507	25.7848	25.9886	25.8464	25.8227	25.8627	25.4079	log2.LFQ.int	0.0721054	0.0529426	25.9886	25.4079	25.9886
TTHERM_00013230	NA	MMS	25.8852	25.8417	25.8324	26.3111	25.902	25.8915	26.1084	log2.LFQ.int	0.0549133	0.141694	26.3111	25.8324	26.3111
TTHERM_00013230	NA	NT1	25.7931	25.928	25.8549	26.2553	25.867	25.9621	25.9951	log2.LFQ.int	0.0367746	0.117598	26.2553	25.7931	26.2553
TTHERM_00013230	NA	NT2	25.3874	25.5491	25.4612	25.8996	25.4	25.5336	25.5246	log2.LFQ.int	0.0306976	0.110744	25.8996	25.3874	25.8996
TTHERM_00013230	NA	NT3	25.2008	25.1894	25.3017	25.9146	25.1289	25.2479	25.4095	log2.LFQ.int	0.0655957	0.16048	25.9146	25.1289	25.9146
TTHERM_00013230	NA	UV	25.0469	25.4272	25.1548	25.7944	25.332	25.2969	25.5561	log2.LFQ.int	0.143993	0.265794	25.7944	25.0469	25.7944
TTHERM_00013290	RAD23	CPT	31.0754	31.4273	31.5092	31.5513	31.6383	31.6734	31.7373	log2.LFQ.int	0.0148367	0.187606	31.7373	31.0754	31.7373
TTHERM_00013290	RAD23	HP	31.1877	31.3532	31.6274	31.5604	31.4943	31.2513	31.2522	log2.LFQ.int	0.0120914	0.275591	31.6274	31.1877	31.6274
TTHERM_00013290	RAD23	HU	30.753	30.7286	30.6582	30.5725	30.4908	30.495	30.5194	log2.LFQ.int	0.00887883	0.186226	30.753	30.4908	30.753
TTHERM_00013290	RAD23	IR	30.9512	30.6591	30.7672	30.8069	30.6514	30.5204	30.4591	log2.LFQ.int	0.0147704	0.201147	30.9512	30.4591	30.9512
TTHERM_00013290	RAD23	MMS	31.2098	31.6809	31.688	31.8156	31.841	32.0615	32.0945	log2.LFQ.int	0.0200099	0.266803	32.0945	31.2098	32.0945
TTHERM_00013290	RAD23	NT1	31.4007	31.415	31.3476	31.4501	31.5997	31.6086	31.3311	log2.LFQ.int	0.00758986	0.150764	31.6086	31.3311	31.6086
TTHERM_00013290	RAD23	NT2	30.8407	30.7211	30.6333	30.784	30.7062	30.666	30.4989	log2.LFQ.int	0.00733227	0.102913	30.8407	30.4989	30.8407
TTHERM_00013290	RAD23	NT3	30.5896	30.5143	30.2566	30.4182	30.3682	30.3979	30.4563	log2.LFQ.int	0.00799419	0.102209	30.5896	30.2566	30.5896
TTHERM_00013290	RAD23	UV	30.8284	30.7993	30.9302	30.8358	30.8108	30.7108	30.4272	log2.LFQ.int	0.0116026	0.0770534	30.9302	30.4272	30.9302
TTHERM_00013360	HOS4.TTHERM_00013360	CPT	26.5839	26.1496	26.0214	25.9068	25.874	26.0366	26.6135	log2.LFQ.int	0.082763	0.402701	26.6135	25.874	26.6135
TTHERM_00013360	HOS4.TTHERM_00013360	HP	25.8066	25.7618	25.7085	26.3052	26.0654	25.9684	26.1842	log2.LFQ.int	0.0609236	0.340598	26.3052	25.7085	26.3052
TTHERM_00013360	HOS4.TTHERM_00013360	HU	26.8187	26.1171	26.4893	26.6697	26.9774	26.9906	26.5462	log2.LFQ.int	0.0642687	0.38029	26.9906	26.1171	26.9906
TTHERM_00013360	HOS4.TTHERM_00013360	IR	26.8103	26.8919	26.5026	26.6033	26.4928	26.5483	26.5062	log2.LFQ.int	0.0406555	0.20244	26.8919	26.4928	26.8919
TTHERM_00013360	HOS4.TTHERM_00013360	MMS	26.0137	26.0251	25.7994	26.6277	25.8561	25.9774	25.9353	log2.LFQ.int	0.0767853	0.123722	26.6277	25.7994	26.6277
TTHERM_00013360	HOS4.TTHERM_00013360	NT1	25.7897	26.0189	25.6232	26.4682	25.8345	26.0552	26.0278	log2.LFQ.int	0.0672351	0.2294	26.4682	25.6232	26.4682
TTHERM_00013360	HOS4.TTHERM_00013360	NT2	26.758	26.963	26.4742	26.8754	27.0156	26.9619	26.9694	log2.LFQ.int	0.0225773	0.149493	27.0156	26.4742	27.0156
TTHERM_00013360	HOS4.TTHERM_00013360	NT3	25.9155	26.9852	26.5036	26.4582	26.5998	26.5382	26.8139	log2.LFQ.int	0.0545375	0.225965	26.9852	25.9155	26.9852
TTHERM_00013360	HOS4.TTHERM_00013360	UV	27.0682	26.7192	26.4765	26.052	25.9999	26.5499	25.9166	log2.LFQ.int	0.11432	0.608616	27.0682	25.9166	27.0682
TTHERM_000133669	COQ5.TTHERM_000133669	CPT	31.7429	31.7152	31.6815	31.5991	31.5384	31.5309	31.4826	log2.LFQ.int	0.00725854	0.163696	31.7429	31.4826	31.7429
TTHERM_000133669	COQ5.TTHERM_000133669	HP	32.0777	32.1285	32.1563	32.1493	32.3226	32.2032	32.2644	log2.LFQ.int	0.0053084	0.0949002	32.3226	32.0777	32.3226
TTHERM_000133669	COQ5.TTHERM_000133669	HU	31.8211	31.7617	31.7246	31.677	31.5885	31.5907	31.5666	log2.LFQ.int	0.00679211	0.153553	31.8211	31.5666	31.8211
TTHERM_000133669	COQ5.TTHERM_000133669	IR	31.4879	31.5946	31.7169	31.8458	31.9526	31.9782	32.022	log2.LFQ.int	0.0149883	0.309647	32.022	31.4879	32.022
TTHERM_000133669	COQ5.TTHERM_000133669	MMS	32.0964	31.9319	31.9317	32.1131	32	31.9689	31.9158	log2.LFQ.int	0.00538281	0.116448	32.1131	31.9158	32.1131
TTHERM_000133669	COQ5.TTHERM_000133669	NT1	32.1235	32.119	32.1296	32.1003	32.0858	32.0816	31.966	log2.LFQ.int	0.00306632	0.0375526	32.1296	31.966	32.1296
TTHERM_000133669	COQ5.TTHERM_000133669	NT2	31.8501	31.8004	31.7962	31.8934	31.8483	31.8523	31.866	log2.LFQ.int	0.00196988	0.0348002	31.8934	31.7962	31.8934
TTHERM_000133669	COQ5.TTHERM_000133669	NT3	31.6183	31.5922	31.6619	31.6877	31.6368	31.6976	31.7159	log2.LFQ.int	0.00291881	0.0651077	31.7159	31.5922	31.7159
TTHERM_000133669	COQ5.TTHERM_000133669	UV	31.5677	31.598	31.8753	31.9788	32.2217	32.4019	32.488	log2.LFQ.int	0.0255048	0.57518	32.488	31.5677	32.488
TTHERM_00013410	CDA12	CPT	25.3774	25.3059	25.285	25.8303	25.4118	25.1795	25.3415	log2.LFQ.int	0.088867	0.0991871	25.8303	25.1795	25.8303
TTHERM_00013410	CDA12	HP	25.8205	25.752	25.9167	26.3274	25.9758	25.854	26.039	log2.LFQ.int	0.0485174	0.170188	26.3274	25.752	26.3274
TTHERM_00013410	CDA12	HU	25.5345	25.4086	25.5836	26.0679	26.2576	26.0979	26.2506	log2.LFQ.int	0.10886	0.615201	26.2576	25.4086	26.2576
TTHERM_00013410	CDA12	IR	25.5756	25.5284	25.3855	26.0307	25.5855	25.5672	25.4488	log2.LFQ.int	0.104183	0.0919694	26.0307	25.3855	26.0307
TTHERM_00013410	CDA12	MMS	25.9191	25.7559	26.0225	26.276	25.9065	25.9814	26.1304	log2.LFQ.int	0.0571658	0.163627	26.276	25.7559	26.276
TTHERM_00013410	CDA12	NT1	25.8444	25.9782	25.9351	26.4092	26.0195	26.0595	25.9651	log2.LFQ.int	0.0400656	0.0893886	26.4092	25.8444	26.4092
TTHERM_00013410	CDA12	NT2	25.5267	25.5552	25.4889	25.96	25.4958	25.4055	25.5259	log2.LFQ.int	0.0290742	0.048585	25.96	25.4055	25.96
TTHERM_00013410	CDA12	NT3	25.193	25.2993	25.3826	25.7522	25.1288	25.4225	25.4341	log2.LFQ.int	0.0550756	0.182092	25.7522	25.1288	25.7522
TTHERM_00013410	CDA12	UV	25.1902	25.2961	25.3761	25.6884	25.4483	25.371	25.4704	log2.LFQ.int	0.0840048	0.125823	25.6884	25.1902	25.6884
TTHERM_00013470	YEF1.TTHERM_00013470	CPT	26.3991	26.3627	25.8966	25.6268	25.7057	25.7765	25.4052	log2.LFQ.int	0.123276	0.463443	26.3991	25.4052	26.3991
TTHERM_00013470	YEF1.TTHERM_00013470	HP	25.8433	25.883	25.9024	26.4451	26.0133	26.0102	26.0379	log2.LFQ.int	0.0457366	0.132897	26.4451	25.8433	26.4451
TTHERM_00013470	YEF1.TTHERM_00013470	HU	26.8398	26.838	26.1377	26.0588	26.6454	26.5002	26.2089	log2.LFQ.int	0.075487	0.568374	26.8398	26.0588	26.8398
TTHERM_00013470	YEF1.TTHERM_00013470	IR	26.4415	26.4049	25.8086	25.8927	26.388	26.0289	26.1514	log2.LFQ.int	0.0921004	0.435708	26.4415	25.8086	26.4415
TTHERM_00013470	YEF1.TTHERM_00013470	MMS	25.8375	25.9443	26.0191	26.2247	26.0137	26.0024	25.9387	log2.LFQ.int	0.0377179	0.0748642	26.2247	25.8375	26.2247
TTHERM_00013470	YEF1.TTHERM_00013470	NT1	25.6565	26.2178	25.8298	26.3904	26.0464	25.9516	26.1146	log2.LFQ.int	0.0630155	0.27554	26.3904	25.6565	26.3904
TTHERM_00013470	YEF1.TTHERM_00013470	NT2	26.8927	26.5476	26.6158	26.124	26.9286	26.6574	26.5366	log2.LFQ.int	0.0365388	0.232914	26.9286	26.124	26.9286
TTHERM_00013470	YEF1.TTHERM_00013470	NT3	26.3524	26.5797	26.6803	26.1044	26.3717	26.1474	26.1501	log2.LFQ.int	0.0409847	0.326968	26.6803	26.1044	26.6803
TTHERM_00013470	YEF1.TTHERM_00013470	UV	26.1243	26.3737	26.3815	25.7568	25.8437	25.4581	25.8502	log2.LFQ.int	0.116814	0.448761	26.3815	25.4581	26.3815
TTHERM_00013480	CRM1.TTHERM_00013480	CPT	31.5474	31.854	32.0863	32.3225	32.4587	32.6061	32.7503	log2.LFQ.int	0.0283833	0.562234	32.7503	31.5474	32.7503
TTHERM_00013480	CRM1.TTHERM_00013480	HP	31.6031	31.665	31.5375	31.6773	31.473	31.6604	31.6901	log2.LFQ.int	0.00534571	0.100914	31.6901	31.473	31.6901
TTHERM_00013480	CRM1.TTHERM_00013480	HU	31.81	31.7848	31.8058	31.8969	31.8224	31.7606	31.7335	log2.LFQ.int	0.00343158	0.0435251	31.8969	31.7335	31.8969
TTHERM_00013480	CRM1.TTHERM_00013480	IR	31.8712	32.0458	32.0884	32.0569	32.0041	31.8552	31.7561	log2.LFQ.int	0.00886767	0.188125	32.0884	31.7561	32.0884
TTHERM_00013480	CRM1.TTHERM_00013480	MMS	31.6258	31.5818	31.587	31.7137	31.649	31.6907	31.7344	log2.LFQ.int	0.00442046	0.095776	31.7344	31.5818	31.7344
TTHERM_00013480	CRM1.TTHERM_00013480	NT1	31.577	31.4946	31.5022	31.6317	31.5512	31.3974	31.4894	log2.LFQ.int	0.00507096	0.0721223	31.6317	31.3974	31.6317
TTHERM_00013480	CRM1.TTHERM_00013480	NT2	31.8372	31.8089	31.7821	31.8105	31.7487	31.6774	31.6936	log2.LFQ.int	0.00360092	0.088552	31.8372	31.6774	31.8372
TTHERM_00013480	CRM1.TTHERM_00013480	NT3	31.622	31.5642	31.598	31.7118	31.6091	31.5519	31.5158	log2.LFQ.int	0.00391627	0.0575386	31.7118	31.5158	31.7118
TTHERM_00013480	CRM1.TTHERM_00013480	UV	31.6584	31.8256	31.9467	31.9511	31.9731	31.8625	31.8418	log2.LFQ.int	0.00717787	0.115247	31.9731	31.6584	31.9731
TTHERM_00013530	NA	CPT	30.1174	30.0029	29.9754	29.9515	29.9032	29.7547	29.7557	log2.LFQ.int	0.012106	0.15969	30.1174	29.7547	30.1174
TTHERM_00013530	NA	HP	29.9707	30.1394	30.1312	30.1014	30.2009	30.1563	30.0783	log2.LFQ.int	0.00593914	0.0580313	30.2009	29.9707	30.2009
TTHERM_00013530	NA	HU	30.2338	30.1401	30.1765	30.1789	30.1156	30.1626	30.2326	log2.LFQ.int	0.00379635	0.0543714	30.2338	30.1156	30.2338
TTHERM_00013530	NA	IR	30.156	30.0624	30.1141	30.1057	30.0953	30.1671	30.1662	log2.LFQ.int	0.00381214	0.0605941	30.1671	30.0624	30.1671
TTHERM_00013530	NA	MMS	29.9447	30.1489	30.1397	30.0723	30.0071	30.0901	30.0073	log2.LFQ.int	0.00704221	0.107739	30.1489	29.9447	30.1489
TTHERM_00013530	NA	NT1	30.0835	30.0454	30.14	30.0109	30.0858	30.004	29.9365	log2.LFQ.int	0.0057149	0.0771997	30.14	29.9365	30.14
TTHERM_00013530	NA	NT2	30.1702	30.1626	30.2659	30.253	30.1916	30.1896	30.1763	log2.LFQ.int	0.00278195	0.0490446	30.2659	30.1626	30.2659
TTHERM_00013530	NA	NT3	30.0322	29.9854	30.0494	30.0552	30.0264	30.0049	29.9955	log2.LFQ.int	0.00216757	0.0405933	30.0552	29.9854	30.0552
TTHERM_00013530	NA	UV	29.9994	29.9093	29.8708	29.7065	29.6304	29.6759	29.765	log2.LFQ.int	0.0133317	0.198821	29.9994	29.6304	29.9994
TTHERM_00013550	STI1.TTHERM_00013550	CPT	34.3787	34.3869	34.4758	34.4513	34.4066	34.3584	34.3552	log2.LFQ.int	0.00233657	0.0604251	34.4758	34.3552	34.4758
TTHERM_00013550	STI1.TTHERM_00013550	HP	33.9369	33.9288	33.9825	34.0929	33.9229	33.7782	33.8406	log2.LFQ.int	0.00512247	0.0779642	34.0929	33.7782	34.0929
TTHERM_00013550	STI1.TTHERM_00013550	HU	34.4252	34.3036	34.2749	34.2469	34.2133	34.213	34.1339	log2.LFQ.int	0.00453226	0.0761255	34.4252	34.1339	34.4252
TTHERM_00013550	STI1.TTHERM_00013550	IR	34.3466	34.2265	34.2299	34.2741	34.2557	34.3416	34.2166	log2.LFQ.int	0.0028341	0.0796485	34.3466	34.2166	34.3466
TTHERM_00013550	STI1.TTHERM_00013550	MMS	33.8156	34.0571	33.9272	33.9178	33.9542	33.9065	33.853	log2.LFQ.int	0.00410219	0.0609705	34.0571	33.8156	34.0571
TTHERM_00013550	STI1.TTHERM_00013550	NT1	34.0847	33.9225	33.9605	33.8748	33.9265	33.9738	33.8003	log2.LFQ.int	0.00447296	0.0685141	34.0847	33.8003	34.0847
TTHERM_00013550	STI1.TTHERM_00013550	NT2	34.3673	34.2591	34.2671	34.2734	34.2429	34.188	34.179	log2.LFQ.int	0.00275662	0.0548035	34.3673	34.179	34.3673
TTHERM_00013550	STI1.TTHERM_00013550	NT3	34.3592	34.3195	34.3124	34.3371	34.3245	34.2698	34.1945	log2.LFQ.int	0.00243077	0.0396917	34.3592	34.1945	34.3592
TTHERM_00013550	STI1.TTHERM_00013550	UV	34.328	34.4436	34.4598	34.4401	34.3015	34.2146	34.2076	log2.LFQ.int	0.0055961	0.183853	34.4598	34.2076	34.4598
TTHERM_00013580	YJU2.TTHERM_00013580	CPT	26.0021	25.7474	26.3276	26.3241	26.7542	26.8382	26.9893	log2.LFQ.int	0.114254	0.633142	26.9893	25.7474	26.9893
TTHERM_00013580	YJU2.TTHERM_00013580	HP	25.9215	25.7697	25.8804	26.258	25.8996	26.0871	26.0621	log2.LFQ.int	0.0427192	0.184569	26.258	25.7697	26.258
TTHERM_00013580	YJU2.TTHERM_00013580	HU	25.3518	25.4286	25.4148	26.025	25.4979	25.3101	25.4647	log2.LFQ.int	0.0782098	0.0980271	26.025	25.3101	26.025
TTHERM_00013580	YJU2.TTHERM_00013580	IR	26.0814	26.1652	25.5554	26.0248	25.7737	25.4676	25.8491	log2.LFQ.int	0.121535	0.38856	26.1652	25.4676	26.1652
TTHERM_00013580	YJU2.TTHERM_00013580	MMS	25.9967	25.8171	25.9349	26.2408	25.9238	25.8402	25.9953	log2.LFQ.int	0.0458845	0.114018	26.2408	25.8171	26.2408
TTHERM_00013580	YJU2.TTHERM_00013580	NT1	25.9345	25.9342	25.7475	26.3715	25.8613	25.9461	26.2804	log2.LFQ.int	0.0551229	0.21547	26.3715	25.7475	26.3715
TTHERM_00013580	YJU2.TTHERM_00013580	NT2	25.4657	25.4596	25.3531	25.7867	25.5424	25.3968	25.4427	log2.LFQ.int	0.0264513	0.0842592	25.7867	25.3531	25.7867
TTHERM_00013580	YJU2.TTHERM_00013580	NT3	25.2802	25.189	25.3904	25.7166	25.0626	25.191	25.3133	log2.LFQ.int	0.0574321	0.161863	25.7166	25.0626	25.7166
TTHERM_00013580	YJU2.TTHERM_00013580	UV	26.1777	27.0476	26.9241	26.341	26.3189	25.9434	25.4348	log2.LFQ.int	0.154474	0.572035	27.0476	25.4348	27.0476
TTHERM_00013710	NA	CPT	25.2984	25.3437	25.36	25.8461	26.1234	25.2923	25.2751	log2.LFQ.int	0.130511	0.3077	26.1234	25.2751	26.1234
TTHERM_00013710	NA	HP	26.4744	27.1787	25.8223	26.9263	26.1451	26.1483	26.1463	log2.LFQ.int	0.102498	0.554683	27.1787	25.8223	27.1787
TTHERM_00013710	NA	HU	25.6405	25.4715	25.6229	26.1648	25.5047	25.7425	25.5664	log2.LFQ.int	0.0729009	0.155932	26.1648	25.4715	26.1648
TTHERM_00013710	NA	IR	25.5321	25.5639	25.4118	25.8923	25.4157	25.543	25.568	log2.LFQ.int	0.0847519	0.0920315	25.8923	25.4118	25.8923
TTHERM_00013710	NA	MMS	27.2733	26.8042	26.8564	26.5536	26.9228	26.7758	27.0171	log2.LFQ.int	0.0470453	0.179923	27.2733	26.5536	27.2733
TTHERM_00013710	NA	NT1	25.9721	26.5078	27.2132	26.8992	27.2433	26.6059	27.0499	log2.LFQ.int	0.0829463	0.574668	27.2433	25.9721	27.2433
TTHERM_00013710	NA	NT2	25.5371	25.4315	25.4543	25.9653	25.4157	25.4885	25.4608	log2.LFQ.int	0.0304905	0.069905	25.9653	25.4157	25.9653
TTHERM_00013710	NA	NT3	25.342	25.3984	25.1287	25.9789	25.3408	25.2012	25.1887	log2.LFQ.int	0.069398	0.175289	25.9789	25.1287	25.9789
TTHERM_00013710	NA	UV	25.3895	25.3632	25.3685	25.8454	25.4394	25.4355	25.2612	log2.LFQ.int	0.0829219	0.0716203	25.8454	25.2612	25.8454
TTHERM_00013750	NA	CPT	29.5354	29.9258	30.0135	30.0895	30.1284	30.2377	30.3314	log2.LFQ.int	0.0224159	0.213383	30.3314	29.5354	30.3314
TTHERM_00013750	NA	HP	29.4126	29.2689	29.4225	29.5385	29.5193	29.5215	29.6412	log2.LFQ.int	0.0110068	0.112457	29.6412	29.2689	29.6412
TTHERM_00013750	NA	HU	29.5587	29.6177	29.5427	29.6387	29.5753	29.4494	29.4207	log2.LFQ.int	0.00781735	0.100409	29.6387	29.4207	29.6387
TTHERM_00013750	NA	IR	29.8385	29.8784	29.7851	29.7679	29.6628	29.5561	29.4777	log2.LFQ.int	0.0154075	0.202334	29.8784	29.4777	29.8784
TTHERM_00013750	NA	MMS	29.5696	29.5453	29.6014	29.4963	29.7953	29.8409	29.8276	log2.LFQ.int	0.0143821	0.254012	29.8409	29.4963	29.8409
TTHERM_00013750	NA	NT1	29.5255	29.336	29.3947	29.1142	29.3271	29.3307	28.8356	log2.LFQ.int	0.0204397	0.144672	29.5255	28.8356	29.5255
TTHERM_00013750	NA	NT2	29.6142	29.5992	29.5421	29.4972	29.4671	29.4873	29.4005	log2.LFQ.int	0.00601461	0.0934422	29.6142	29.4005	29.6142
TTHERM_00013750	NA	NT3	29.5	29.4622	29.4399	29.3969	29.3327	29.3429	29.28	log2.LFQ.int	0.007082	0.11326	29.5	29.28	29.5
TTHERM_00013750	NA	UV	29.5214	30.0367	30.0442	29.9187	29.7376	29.5368	29.4463	log2.LFQ.int	0.0248017	0.448591	30.0442	29.4463	30.0442
TTHERM_00013760	NA	CPT	32.4424	32.4671	32.6215	32.6084	32.55	32.4329	32.4143	log2.LFQ.int	0.00540162	0.141516	32.6215	32.4143	32.6215
TTHERM_00013760	NA	HP	32.3041	32.341	32.4546	32.4845	32.2756	32.2873	32.3476	log2.LFQ.int	0.00492785	0.105393	32.4845	32.2756	32.4845
TTHERM_00013760	NA	HU	32.3995	32.3929	32.4258	32.4895	32.4889	32.5219	32.5917	log2.LFQ.int	0.00446548	0.0930493	32.5917	32.3929	32.5917
TTHERM_00013760	NA	IR	32.6635	32.6067	32.4186	32.4539	32.2857	32.3694	32.4122	log2.LFQ.int	0.0086834	0.13951	32.6635	32.2857	32.6635
TTHERM_00013760	NA	MMS	32.2667	32.4469	32.4654	32.4196	32.3975	32.3795	32.4471	log2.LFQ.int	0.00402785	0.0585164	32.4654	32.2667	32.4654
TTHERM_00013760	NA	NT1	32.375	32.3774	32.356	32.3877	32.3885	32.4684	32.4897	log2.LFQ.int	0.00290625	0.0522053	32.4897	32.356	32.4897
TTHERM_00013760	NA	NT2	32.3984	32.4546	32.4903	32.5005	32.4703	32.4844	32.577	log2.LFQ.int	0.00278694	0.0329396	32.577	32.3984	32.577
TTHERM_00013760	NA	NT3	32.4234	32.4424	32.4024	32.4208	32.4324	32.5103	32.4997	log2.LFQ.int	0.00229204	0.0489202	32.5103	32.4024	32.5103
TTHERM_00013760	NA	UV	32.5963	32.5109	32.3332	32.2485	32.0925	32.0527	32.0271	log2.LFQ.int	0.0150032	0.349416	32.5963	32.0271	32.5963
TTHERM_000137689	NA	CPT	26.653	26.57	26.7783	26.5109	26.6833	26.5475	26.8892	log2.LFQ.int	0.0301136	0.172092	26.8892	26.5109	26.8892
TTHERM_000137689	NA	HP	25.9781	26.3632	26.0594	26.1933	26.3689	26.0267	25.9686	log2.LFQ.int	0.0414657	0.275818	26.3689	25.9686	26.3689
TTHERM_000137689	NA	HU	26.622	26.7995	26.8272	26.7673	26.7368	26.8554	27.1456	log2.LFQ.int	0.0290917	0.0892337	27.1456	26.622	27.1456
TTHERM_000137689	NA	IR	27.0816	26.8509	27.0828	26.3966	26.6886	26.7085	26.7007	log2.LFQ.int	0.0587044	0.271646	27.0828	26.3966	27.0828
TTHERM_000137689	NA	MMS	25.9473	26.5734	26.1434	26.4254	26.1345	26.0934	25.8628	log2.LFQ.int	0.0763629	0.264025	26.5734	25.8628	26.5734
TTHERM_000137689	NA	NT1	26.507	25.9757	26.2547	26.594	26.2959	26.6016	26.0941	log2.LFQ.int	0.0546708	0.376063	26.6016	25.9757	26.6016
TTHERM_000137689	NA	NT2	26.7573	26.8126	26.5661	26.6098	26.5508	27.1648	27.0525	log2.LFQ.int	0.0325212	0.344583	27.1648	26.5508	27.1648
TTHERM_000137689	NA	NT3	26.1205	26.6081	26.6342	26.4573	26.6363	26.781	26.6423	log2.LFQ.int	0.0322056	0.106593	26.781	26.1205	26.781
TTHERM_000137689	NA	UV	26.5252	26.5592	26.552	26.4075	26.2733	26.7555	26.4829	log2.LFQ.int	0.0364752	0.110361	26.7555	26.2733	26.7555
TTHERM_000137808	NA	CPT	25.2383	25.1472	25.5422	25.7797	25.6394	25.6544	25.8128	log2.LFQ.int	0.10849	0.326776	25.8128	25.1472	25.8128
TTHERM_000137808	NA	HP	25.9477	25.7622	25.8054	26.4192	25.9619	25.8044	26.1613	log2.LFQ.int	0.059545	0.256691	26.4192	25.7622	26.4192
TTHERM_000137808	NA	HU	25.614	25.3222	25.566	25.9645	25.7064	25.5525	25.528	log2.LFQ.int	0.0680531	0.119993	25.9645	25.3222	25.9645
TTHERM_000137808	NA	IR	25.7631	25.7117	25.5072	26.0694	25.6134	25.7103	25.6603	log2.LFQ.int	0.081967	0.100597	26.0694	25.5072	26.0694
TTHERM_000137808	NA	MMS	25.8753	25.8046	26.007	26.2627	26.0374	25.8374	26.0478	log2.LFQ.int	0.0535928	0.186245	26.2627	25.8046	26.2627
TTHERM_000137808	NA	NT1	26.0688	25.7944	26.0833	26.455	25.9475	25.7409	26.0126	log2.LFQ.int	0.0574361	0.205086	26.455	25.7409	26.455
TTHERM_000137808	NA	NT2	25.4275	25.5562	25.5373	25.9028	25.4638	25.6042	25.4992	log2.LFQ.int	0.0280152	0.0986845	25.9028	25.4275	25.9028
TTHERM_000137808	NA	NT3	25.7949	25.4007	25.1306	25.6482	25.3401	25.6789	25.2754	log2.LFQ.int	0.0657825	0.35579	25.7949	25.1306	25.7949
TTHERM_000137808	NA	UV	25.4621	25.6105	25.3477	25.7718	25.6702	25.372	25.4357	log2.LFQ.int	0.0793096	0.236475	25.7718	25.3477	25.7718
TTHERM_000137809	NA	CPT	25.129	25.307	25.7993	26.0892	26.1948	26.3726	26.4625	log2.LFQ.int	0.170375	0.730502	26.4625	25.129	26.4625
TTHERM_000137809	NA	HP	25.888	25.8487	25.8228	26.2324	25.9925	26.0255	25.9971	log2.LFQ.int	0.0355958	0.142956	26.2324	25.8228	26.2324
TTHERM_000137809	NA	HU	25.4669	25.7219	25.5777	25.9889	25.8775	25.7701	25.7982	log2.LFQ.int	0.0593421	0.188061	25.9889	25.4669	25.9889
TTHERM_000137809	NA	IR	25.5762	25.7813	25.512	25.9339	25.6322	25.5921	25.3685	log2.LFQ.int	0.101268	0.162626	25.9339	25.3685	25.9339
TTHERM_000137809	NA	MMS	25.5773	26.0154	25.9154	26.5408	25.9022	26.0507	25.8219	log2.LFQ.int	0.0952325	0.170985	26.5408	25.5773	26.5408
TTHERM_000137809	NA	NT1	26.1167	25.8293	25.9913	26.4907	25.6655	25.9975	25.9421	log2.LFQ.int	0.0630879	0.17138	26.4907	25.6655	26.4907
TTHERM_000137809	NA	NT2	25.5464	25.3535	25.5468	25.9827	25.6174	25.6108	25.4388	log2.LFQ.int	0.0364617	0.121499	25.9827	25.3535	25.9827
TTHERM_000137809	NA	NT3	25.42	25.1627	25.4087	25.6176	25.1807	25.376	25.3661	log2.LFQ.int	0.042221	0.140943	25.6176	25.1627	25.6176
TTHERM_000137809	NA	UV	25.3679	25.2401	25.5489	25.7398	25.534	25.3702	25.3838	log2.LFQ.int	0.0841278	0.172395	25.7398	25.2401	25.7398
TTHERM_00013790	CUS1.TTHERM_00013790	CPT	29.3336	29.502	29.6281	29.7252	29.7949	29.9348	29.8819	log2.LFQ.int	0.0208638	0.273418	29.9348	29.3336	29.9348
TTHERM_00013790	CUS1.TTHERM_00013790	HP	29.1888	29.1335	29.2796	29.1788	29.1675	29.0173	29.1831	log2.LFQ.int	0.00726307	0.0354412	29.2796	29.0173	29.2796
TTHERM_00013790	CUS1.TTHERM_00013790	HU	29.4078	29.2818	29.3863	29.2414	29.2587	29.1945	29.1581	log2.LFQ.int	0.00943501	0.116087	29.4078	29.1581	29.4078
TTHERM_00013790	CUS1.TTHERM_00013790	IR	29.532	29.5432	29.5284	29.5224	29.3861	29.3436	29.2793	log2.LFQ.int	0.0112827	0.165387	29.5432	29.2793	29.5432
TTHERM_00013790	CUS1.TTHERM_00013790	MMS	28.9499	29.2582	29.3584	29.0465	29.3434	29.3359	29.4623	log2.LFQ.int	0.0192644	0.198527	29.4623	28.9499	29.4623
TTHERM_00013790	CUS1.TTHERM_00013790	NT1	29.3543	29.3044	29.1008	29.1537	29.0635	29.1183	28.8586	log2.LFQ.int	0.0160505	0.146883	29.3543	28.8586	29.3543
TTHERM_00013790	CUS1.TTHERM_00013790	NT2	29.4395	29.3523	29.3018	29.277	29.3803	29.3061	29.2703	log2.LFQ.int	0.00492988	0.0768864	29.4395	29.2703	29.4395
TTHERM_00013790	CUS1.TTHERM_00013790	NT3	29.2785	29.2019	29.0936	29.2895	29.2443	29.1893	29.1519	log2.LFQ.int	0.00645101	0.0908017	29.2895	29.0936	29.2895
TTHERM_00013790	CUS1.TTHERM_00013790	UV	29.3635	29.7567	29.5587	29.532	29.3169	29.118	29.2002	log2.LFQ.int	0.0235614	0.286837	29.7567	29.118	29.7567
TTHERM_000138049	NA	CPT	27.2847	27.0207	26.0271	26.8405	26.4414	26.7304	26.1758	log2.LFQ.int	0.103945	0.621966	27.2847	26.0271	27.2847
TTHERM_000138049	NA	HP	27.2775	26.7623	26.9667	26.8856	27.6898	27.4054	27.4208	log2.LFQ.int	0.0552856	0.486928	27.6898	26.7623	27.6898
TTHERM_000138049	NA	HU	26.8652	26.7892	27.1894	25.8997	27.0304	26.3921	26.1481	log2.LFQ.int	0.103205	0.677687	27.1894	25.8997	27.1894
TTHERM_000138049	NA	IR	26.1472	26.643	26.3605	26.017	26.9236	26.8267	26.9122	log2.LFQ.int	0.104477	0.615596	26.9236	26.017	26.9236
TTHERM_000138049	NA	MMS	27.2814	26.7033	27.3187	26.4245	26.6923	25.8264	26.4655	log2.LFQ.int	0.120256	0.54733	27.3187	25.8264	27.3187
TTHERM_000138049	NA	NT1	26.9487	27.1371	27.2348	26.978	27.1199	27.0157	26.8738	log2.LFQ.int	0.021442	0.165149	27.2348	26.8738	27.2348
TTHERM_000138049	NA	NT2	27.2041	26.6111	26.7631	27.1862	26.9005	26.732	26.8037	log2.LFQ.int	0.0296733	0.295794	27.2041	26.6111	27.2041
TTHERM_000138049	NA	NT3	26.7683	26.939	26.9864	26.4932	26.5876	27.1327	27.2414	log2.LFQ.int	0.0434201	0.381606	27.2414	26.4932	27.2414
TTHERM_000138049	NA	UV	27.0909	26.832	26.9864	26.5743	27.4899	27.3814	27.0515	log2.LFQ.int	0.0623585	0.326974	27.4899	26.5743	27.4899
TTHERM_000140858	NA	CPT	25.9327	25.9152	25.36	25.9961	25.6749	25.1029	25.2492	log2.LFQ.int	0.149023	0.619358	25.9961	25.1029	25.9961
TTHERM_000140858	NA	HP	25.9269	26.0285	25.9025	26.2866	26.1454	26.0256	26.1071	log2.LFQ.int	0.0336343	0.150002	26.2866	25.9025	26.2866
TTHERM_000140858	NA	HU	25.5114	25.4194	25.4932	25.9374	25.561	25.6505	25.4519	log2.LFQ.int	0.0599809	0.133212	25.9374	25.4194	25.9374
TTHERM_000140858	NA	IR	25.5054	25.3838	25.5668	26.0419	25.5014	25.6436	25.5561	log2.LFQ.int	0.1058	0.1018	26.0419	25.3838	26.0419
TTHERM_000140858	NA	MMS	26.0841	25.9628	25.7483	26.5352	26.0414	26.0215	25.9215	log2.LFQ.int	0.0726281	0.120562	26.5352	25.7483	26.5352
TTHERM_000140858	NA	NT1	25.8409	25.88	25.8492	26.3697	25.9567	25.9739	25.8944	log2.LFQ.int	0.0396055	0.100745	26.3697	25.8409	26.3697
TTHERM_000140858	NA	NT2	25.4634	25.3018	25.4011	25.8915	25.4467	25.4635	25.6052	log2.LFQ.int	0.035681	0.110465	25.8915	25.3018	25.8915
TTHERM_000140858	NA	NT3	25.2885	25.2034	25.3702	25.8857	25.1067	25.1177	25.2959	log2.LFQ.int	0.0670788	0.172483	25.8857	25.1067	25.8857
TTHERM_000140858	NA	UV	25.106	25.2388	25.3117	25.7404	25.6088	25.5417	25.2904	log2.LFQ.int	0.126648	0.310617	25.7404	25.106	25.7404
TTHERM_000142399	NA	CPT	25.197	25.2352	25.168	25.9385	25.2463	25.1563	25.2015	log2.LFQ.int	0.107823	0.0582752	25.9385	25.1563	25.9385
TTHERM_000142399	NA	HP	26.0582	25.8523	25.8205	26.259	26.0484	25.9403	26.0464	log2.LFQ.int	0.0380095	0.156987	26.259	25.8205	26.259
TTHERM_000142399	NA	HU	25.6723	25.4524	25.2802	25.9162	25.4556	25.4394	25.4741	log2.LFQ.int	0.0737207	0.127238	25.9162	25.2802	25.9162
TTHERM_000142399	NA	IR	25.3275	25.5172	25.4277	25.9668	25.4417	25.4767	25.4696	log2.LFQ.int	0.106986	0.0622236	25.9668	25.3275	25.9668
TTHERM_000142399	NA	MMS	27.1919	27.0166	27.1769	26.3801	27.6747	27.6331	27.7199	log2.LFQ.int	0.0855016	0.557178	27.7199	26.3801	27.7199
TTHERM_000142399	NA	NT1	25.7722	26.0011	25.806	26.6714	25.908	26.021	26.0918	log2.LFQ.int	0.0675573	0.199408	26.6714	25.7722	26.6714
TTHERM_000142399	NA	NT2	25.4043	25.5225	25.5184	26.0023	25.5307	25.474	25.6479	log2.LFQ.int	0.0340065	0.0930443	26.0023	25.4043	26.0023
TTHERM_000142399	NA	NT3	25.1847	25.2233	25.089	25.7558	25.2168	25.3415	25.2793	log2.LFQ.int	0.0551109	0.109621	25.7558	25.089	25.7558
TTHERM_000142399	NA	UV	25.2748	25.2966	25.226	25.8264	25.3107	25.4889	25.3767	log2.LFQ.int	0.101644	0.147154	25.8264	25.226	25.8264
TTHERM_000145059	ETR1.TTHERM_000145059	CPT	25.3665	25.2202	25.2485	25.8538	25.4532	25.1538	25.2129	log2.LFQ.int	0.109731	0.193284	25.8538	25.1538	25.8538
TTHERM_000145059	ETR1.TTHERM_000145059	HP	26.0932	25.8766	25.5913	26.3947	26.0424	25.9865	25.9734	log2.LFQ.int	0.0606136	0.1428	26.3947	25.5913	26.3947
TTHERM_000145059	ETR1.TTHERM_000145059	HU	25.5153	25.3734	25.4175	25.8863	25.9445	26.0773	26.1283	log2.LFQ.int	0.104863	0.544513	26.1283	25.3734	26.1283
TTHERM_000145059	ETR1.TTHERM_000145059	IR	25.561	25.4662	25.4687	26.0227	25.5566	25.5443	25.5329	log2.LFQ.int	0.0862601	0.0579746	26.0227	25.4662	26.0227
TTHERM_000145059	ETR1.TTHERM_000145059	MMS	26.0859	25.9108	25.8558	26.2916	25.8587	26.0171	25.8634	log2.LFQ.int	0.0524024	0.190426	26.2916	25.8558	26.2916
TTHERM_000145059	ETR1.TTHERM_000145059	NT1	25.9969	25.911	26.0315	26.4258	25.8996	26.0144	25.8792	log2.LFQ.int	0.0404137	0.117664	26.4258	25.8792	26.4258
TTHERM_000145059	ETR1.TTHERM_000145059	NT2	25.4733	25.3498	25.4653	25.965	25.5216	25.4576	25.503	log2.LFQ.int	0.0324068	0.0508691	25.965	25.3498	25.965
TTHERM_000145059	ETR1.TTHERM_000145059	NT3	25.114	25.1921	25.0204	25.8265	25.1706	25.2882	25.305	log2.LFQ.int	0.0686347	0.154324	25.8265	25.0204	25.8265
TTHERM_000145059	ETR1.TTHERM_000145059	UV	25.1498	25.3367	25.2989	25.9518	25.1863	25.3237	25.4918	log2.LFQ.int	0.135716	0.171681	25.9518	25.1498	25.9518
TTHERM_000145609	NA	CPT	25.9787	25.8469	26.507	25.8732	26.1499	26.6664	26.878	log2.LFQ.int	0.110289	0.660809	26.878	25.8469	26.878
TTHERM_000145609	NA	HP	26.8575	27.1959	27.9619	27.308	27.1631	27.1202	26.7587	log2.LFQ.int	0.0591998	0.263152	27.9619	26.7587	27.9619
TTHERM_000145609	NA	HU	27.2328	27.4322	27.3877	27.7387	27.5001	27.4084	27.7994	log2.LFQ.int	0.0308514	0.221357	27.7994	27.2328	27.7994
TTHERM_000145609	NA	IR	27.3026	26.7981	27.2778	27.3351	27.2101	27.1917	26.9235	log2.LFQ.int	0.0410091	0.232618	27.3351	26.7981	27.3351
TTHERM_000145609	NA	MMS	26.8657	26.888	27.0504	27.5649	27.5218	27.6999	27.1814	log2.LFQ.int	0.0639584	0.574178	27.6999	26.8657	27.6999
TTHERM_000145609	NA	NT1	27.3067	27.2056	27.3963	27.1566	26.8446	26.1273	27.174	log2.LFQ.int	0.0642898	0.255507	27.3963	26.1273	27.3963
TTHERM_000145609	NA	NT2	26.8589	27.4198	26.8287	27.1283	27.3273	26.9432	27.3997	log2.LFQ.int	0.0320194	0.46246	27.4198	26.8287	27.4198
TTHERM_000145609	NA	NT3	26.0958	26.6918	26.4751	25.7687	26.0337	26.5743	26.3516	log2.LFQ.int	0.0628733	0.459955	26.6918	25.7687	26.6918
TTHERM_000145609	NA	UV	26.4317	26.6714	26.2708	25.8312	27.2165	26.5576	26.9067	log2.LFQ.int	0.111076	0.437795	27.2165	25.8312	27.2165
TTHERM_000145639	NA	CPT	31.8354	31.7072	31.6555	31.5963	31.5214	31.3879	31.3047	log2.LFQ.int	0.0133532	0.226708	31.8354	31.3047	31.8354
TTHERM_000145639	NA	HP	32.0261	31.9647	32.0407	31.8696	32.0643	32.1539	32.2127	log2.LFQ.int	0.00736467	0.113713	32.2127	31.8696	32.2127
TTHERM_000145639	NA	HU	31.9694	31.8927	31.7634	31.7836	31.5931	31.4862	31.4423	log2.LFQ.int	0.0140603	0.298496	31.9694	31.4423	31.9694
TTHERM_000145639	NA	IR	31.8263	31.8413	32.0556	32.1627	32.2265	32.1294	31.9365	log2.LFQ.int	0.0113537	0.257158	32.2265	31.8263	32.2265
TTHERM_000145639	NA	MMS	31.8096	31.9886	31.7059	31.8907	31.8951	31.783	31.7004	log2.LFQ.int	0.00751918	0.148495	31.9886	31.7004	31.9886
TTHERM_000145639	NA	NT1	32.0538	31.9904	31.9691	32.0931	31.9417	31.9808	31.7941	log2.LFQ.int	0.00584358	0.0666598	32.0931	31.7941	32.0931
TTHERM_000145639	NA	NT2	32.0218	32.0401	31.9579	31.9942	31.8766	31.8275	31.7831	log2.LFQ.int	0.00583911	0.155986	32.0401	31.7831	32.0401
TTHERM_000145639	NA	NT3	31.8765	31.8394	31.9189	31.9349	31.802	31.7737	31.7479	log2.LFQ.int	0.00455024	0.109816	31.9349	31.7479	31.9349
TTHERM_000145639	NA	UV	31.885	31.8318	32.0578	32.3439	32.4931	32.5496	32.6073	log2.LFQ.int	0.0214625	0.549936	32.6073	31.8318	32.6073
TTHERM_000145988	NA	CPT	26.3588	26.2494	26.0626	26.0732	25.8049	25.807	25.9563	log2.LFQ.int	0.0639263	0.279669	26.3588	25.8049	26.3588
TTHERM_000145988	NA	HP	26.0267	25.9693	25.9134	26.3058	25.9965	26.0012	26.0542	log2.LFQ.int	0.0280295	0.0576029	26.3058	25.9134	26.3058
TTHERM_000145988	NA	HU	26.3476	26.4323	25.8279	26.0831	26.1665	26.373	26.1849	log2.LFQ.int	0.0524992	0.23546	26.4323	25.8279	26.4323
TTHERM_000145988	NA	IR	26.3766	26.7509	26.761	26.7001	26.8267	26.6078	26.5252	log2.LFQ.int	0.0412421	0.189498	26.8267	26.3766	26.8267
TTHERM_000145988	NA	MMS	26.7872	26.4241	25.7955	26.4323	26.5342	26.675	26.9816	log2.LFQ.int	0.0911473	0.302944	26.9816	25.7955	26.9816
TTHERM_000145988	NA	NT1	26.9975	26.6279	26.8226	26.3795	26.8131	26.6919	26.541	log2.LFQ.int	0.0393286	0.233409	26.9975	26.3795	26.9975
TTHERM_000145988	NA	NT2	26.5595	26.6579	26.6083	26.4741	26.2591	26.397	26.237	log2.LFQ.int	0.0250819	0.255837	26.6579	26.237	26.6579
TTHERM_000145988	NA	NT3	26.2214	26.1571	26.277	25.8147	26.3362	26.0078	26.2268	log2.LFQ.int	0.0339693	0.16943	26.3362	25.8147	26.3362
TTHERM_000145988	NA	UV	26.4031	26.4615	26.3375	26.5717	25.8398	26.293	25.9804	log2.LFQ.int	0.0742328	0.295593	26.5717	25.8398	26.5717
TTHERM_000148715	RPN8.TTHERM_000148715	CPT	31.6426	31.6147	31.6427	31.696	31.6728	31.6998	31.8302	log2.LFQ.int	0.00452656	0.055268	31.8302	31.6147	31.8302
TTHERM_000148715	RPN8.TTHERM_000148715	HP	31.767	31.8404	31.8086	31.6919	31.8752	31.7926	32.0115	log2.LFQ.int	0.00640556	0.0779931	32.0115	31.6919	32.0115
TTHERM_000148715	RPN8.TTHERM_000148715	HU	31.9228	31.7712	31.6899	31.6168	31.5778	31.4367	31.4303	log2.LFQ.int	0.0124016	0.223324	31.9228	31.4303	31.9228
TTHERM_000148715	RPN8.TTHERM_000148715	IR	31.9175	32.1266	32.1503	32.2188	32.1986	31.919	31.785	log2.LFQ.int	0.0116479	0.256141	32.2188	31.785	32.2188
TTHERM_000148715	RPN8.TTHERM_000148715	MMS	31.6251	31.793	31.6836	31.6909	31.7942	31.8028	31.6959	log2.LFQ.int	0.00483176	0.106393	31.8028	31.6251	31.8028
TTHERM_000148715	RPN8.TTHERM_000148715	NT1	31.6973	31.7004	31.5956	31.6848	31.637	31.6466	31.3987	log2.LFQ.int	0.00618679	0.074712	31.7004	31.3987	31.7004
TTHERM_000148715	RPN8.TTHERM_000148715	NT2	31.7945	31.9071	31.7973	31.8275	31.719	31.6149	31.5747	log2.LFQ.int	0.00700315	0.145483	31.9071	31.5747	31.9071
TTHERM_000148715	RPN8.TTHERM_000148715	NT3	31.5026	31.4758	31.5134	31.5844	31.4651	31.3071	31.2998	log2.LFQ.int	0.00672764	0.1219	31.5844	31.2998	31.5844
TTHERM_000148715	RPN8.TTHERM_000148715	UV	31.5627	31.7121	31.6791	31.637	31.6067	31.509	31.3654	log2.LFQ.int	0.00835108	0.122172	31.7121	31.3654	31.7121
TTHERM_000151707	NA	CPT	26.0715	26.0367	26.0931	25.7905	26.1713	26.0991	26.5012	log2.LFQ.int	0.0561675	0.0810673	26.5012	25.7905	26.5012
TTHERM_000151707	NA	HP	26.0622	25.8716	25.6487	26.3056	26.05	25.9182	26.0657	log2.LFQ.int	0.0522287	0.169092	26.3056	25.6487	26.3056
TTHERM_000151707	NA	HU	25.4067	25.4194	25.4129	26.0483	25.6047	25.4096	25.5035	log2.LFQ.int	0.0731366	0.142829	26.0483	25.4067	26.0483
TTHERM_000151707	NA	IR	25.762	25.6816	26.1972	26.1372	26.4568	25.8008	26.0333	log2.LFQ.int	0.110482	0.385801	26.4568	25.6816	26.4568
TTHERM_000151707	NA	MMS	25.9433	25.9364	25.6185	26.2834	25.7592	26.0015	25.8422	log2.LFQ.int	0.0741312	0.171695	26.2834	25.6185	26.2834
TTHERM_000151707	NA	NT1	25.7767	26.1333	26.027	26.348	25.8013	26.0766	26.0679	log2.LFQ.int	0.0486277	0.190816	26.348	25.7767	26.348
TTHERM_000151707	NA	NT2	25.5072	25.6264	25.5825	25.9932	25.3519	25.6302	25.5149	log2.LFQ.int	0.0358111	0.117248	25.9932	25.3519	25.9932
TTHERM_000151707	NA	NT3	26.0275	25.7462	25.9612	25.8837	26.0426	25.6816	26.0238	log2.LFQ.int	0.0307435	0.210727	26.0426	25.6816	26.0426
TTHERM_000151707	NA	UV	25.7752	25.8858	26.1053	26.1619	26.92	27.2119	26.9853	log2.LFQ.int	0.152323	0.957075	27.2119	25.7752	27.2119
TTHERM_000156719	NA	CPT	25.3658	25.3641	25.2203	25.7334	25.2715	25.064	25.1805	log2.LFQ.int	0.106136	0.164618	25.7334	25.064	25.7334
TTHERM_000156719	NA	HP	25.8519	25.7509	25.9788	26.4011	25.9115	26.0855	25.9292	log2.LFQ.int	0.0519026	0.150413	26.4011	25.7509	26.4011
TTHERM_000156719	NA	HU	25.7891	25.7579	25.8329	26.0829	26.0904	25.4258	25.5635	log2.LFQ.int	0.0797365	0.297204	26.0904	25.4258	26.0904
TTHERM_000156719	NA	IR	25.5663	26.0854	26.1157	26.349	25.9761	25.884	25.8719	log2.LFQ.int	0.0973416	0.222632	26.349	25.5663	26.349
TTHERM_000156719	NA	MMS	25.9457	25.7494	26.0257	26.3299	25.9742	25.8852	26.0455	log2.LFQ.int	0.0581965	0.120139	26.3299	25.7494	26.3299
TTHERM_000156719	NA	NT1	26.0098	25.9103	25.8902	26.4259	26.018	26.0437	25.8297	log2.LFQ.int	0.0444526	0.130613	26.4259	25.8297	26.4259
TTHERM_000156719	NA	NT2	25.761	25.6556	25.8057	25.9948	25.6271	25.5312	25.99	log2.LFQ.int	0.0334514	0.256484	25.9948	25.5312	25.9948
TTHERM_000156719	NA	NT3	25.2671	25.3431	25.1643	25.8495	25.7514	25.9298	25.2478	log2.LFQ.int	0.0825873	0.542925	25.9298	25.1643	25.9298
TTHERM_000156719	NA	UV	25.3324	25.3844	25.3596	25.7183	25.2959	25.5105	25.8384	log2.LFQ.int	0.102174	0.268389	25.8384	25.2959	25.8384
TTHERM_000157809	YBR241C.TTHERM_000157809	CPT	25.6476	25.3567	25.6565	25.7503	25.3325	25.1374	25.3048	log2.LFQ.int	0.104965	0.333426	25.7503	25.1374	25.7503
TTHERM_000157809	YBR241C.TTHERM_000157809	HP	25.9484	26.002	25.7216	26.2551	26.1056	26.0539	26.1451	log2.LFQ.int	0.0428021	0.150166	26.2551	25.7216	26.2551
TTHERM_000157809	YBR241C.TTHERM_000157809	HU	25.4412	25.5594	25.4387	25.9486	25.5572	25.4475	25.4992	log2.LFQ.int	0.056511	0.113944	25.9486	25.4387	25.9486
TTHERM_000157809	YBR241C.TTHERM_000157809	IR	25.5811	25.4385	25.5511	25.9016	25.4962	25.4833	25.447	log2.LFQ.int	0.0826337	0.100983	25.9016	25.4385	25.9016
TTHERM_000157809	YBR241C.TTHERM_000157809	MMS	25.8736	25.9107	26.0247	26.329	25.7668	26.0683	26.4349	log2.LFQ.int	0.0800347	0.306494	26.4349	25.7668	26.4349
TTHERM_000157809	YBR241C.TTHERM_000157809	NT1	25.6904	26.1002	25.8279	26.404	25.9239	26.1626	26.0463	log2.LFQ.int	0.0601389	0.255509	26.404	25.6904	26.404
TTHERM_000157809	YBR241C.TTHERM_000157809	NT2	25.4399	25.8037	25.5155	25.7397	25.4648	25.3899	25.4356	log2.LFQ.int	0.0309257	0.189836	25.8037	25.3899	25.8037
TTHERM_000157809	YBR241C.TTHERM_000157809	NT3	25.1789	25.4441	25.3462	25.8516	25.1837	25.4067	25.6296	log2.LFQ.int	0.0647541	0.271902	25.8516	25.1789	25.8516
TTHERM_000157809	YBR241C.TTHERM_000157809	UV	25.4744	25.233	25.7219	25.8945	25.9082	26.0507	25.9963	log2.LFQ.int	0.117304	0.354071	26.0507	25.233	26.0507
TTHERM_000157889	NA	CPT	31.5578	31.4797	31.3543	31.3301	31.1948	31.0265	30.9823	log2.LFQ.int	0.0164448	0.306369	31.5578	30.9823	31.5578
TTHERM_000157889	NA	HP	31.6898	31.7205	31.6457	31.6785	31.6824	31.737	31.7518	log2.LFQ.int	0.00251959	0.0482557	31.7518	31.6457	31.7518
TTHERM_000157889	NA	HU	31.5432	31.4719	31.4679	31.4194	31.4187	31.3959	31.3801	log2.LFQ.int	0.00389151	0.0626019	31.5432	31.3801	31.5432
TTHERM_000157889	NA	IR	31.3573	31.3696	31.4706	31.6487	31.68	31.723	31.7304	log2.LFQ.int	0.0121055	0.281378	31.7304	31.3573	31.7304
TTHERM_000157889	NA	MMS	31.6786	31.6457	31.5635	31.4608	31.4949	31.3731	31.3007	log2.LFQ.int	0.0103722	0.187641	31.6786	31.3007	31.6786
TTHERM_000157889	NA	NT1	31.6885	31.6594	31.6307	31.6792	31.6864	31.7123	31.6076	log2.LFQ.int	0.00243103	0.0424117	31.7123	31.6076	31.7123
TTHERM_000157889	NA	NT2	31.5729	31.6026	31.599	31.6513	31.6094	31.6218	31.6562	log2.LFQ.int	0.00176932	0.0357266	31.6562	31.5729	31.6562
TTHERM_000157889	NA	NT3	31.4151	31.4256	31.4393	31.5179	31.4494	31.4985	31.5096	log2.LFQ.int	0.0027574	0.0715566	31.5179	31.4151	31.5179
TTHERM_000157889	NA	UV	31.4357	31.3555	31.5047	31.6334	31.7866	31.9343	31.9685	log2.LFQ.int	0.0177074	0.39027	31.9685	31.3555	31.9685
TTHERM_000157929	SRP1.TTHERM_000157929	CPT	32.232	32.1701	32.1931	32.1854	32.0473	31.9859	31.9435	log2.LFQ.int	0.00745224	0.172595	32.232	31.9435	32.232
TTHERM_000157929	SRP1.TTHERM_000157929	HP	32.5341	32.5408	32.6241	32.4606	32.4802	32.3951	32.4252	log2.LFQ.int	0.00478427	0.0945736	32.6241	32.3951	32.6241
TTHERM_000157929	SRP1.TTHERM_000157929	HU	32.2618	32.252	32.1712	32.228	32.2665	32.3406	32.3527	log2.LFQ.int	0.0039674	0.0635457	32.3527	32.1712	32.3527
TTHERM_000157929	SRP1.TTHERM_000157929	IR	32.3328	32.1863	32.1381	32.2409	32.3228	32.2899	32.3602	log2.LFQ.int	0.00562073	0.114225	32.3602	32.1381	32.3602
TTHERM_000157929	SRP1.TTHERM_000157929	MMS	32.5017	32.4404	32.5187	32.3667	32.4263	32.3179	32.1795	log2.LFQ.int	0.00753669	0.128743	32.5187	32.1795	32.5187
TTHERM_000157929	SRP1.TTHERM_000157929	NT1	32.4731	32.4477	32.4234	32.4613	32.4767	32.3754	32.3202	log2.LFQ.int	0.00340244	0.0677574	32.4767	32.3202	32.4767
TTHERM_000157929	SRP1.TTHERM_000157929	NT2	32.3471	32.3657	32.3348	32.3582	32.3409	32.3278	32.3148	log2.LFQ.int	0.000985998	0.0213236	32.3657	32.3148	32.3657
TTHERM_000157929	SRP1.TTHERM_000157929	NT3	32.3708	32.3154	32.3028	32.316	32.2924	32.3366	32.2933	log2.LFQ.int	0.00155677	0.028211	32.3708	32.2924	32.3708
TTHERM_000157929	SRP1.TTHERM_000157929	UV	32.334	32.2215	32.1061	32.0039	31.9438	31.9019	31.9261	log2.LFQ.int	0.0110206	0.228831	32.334	31.9019	32.334
TTHERM_00015980	ECT1.TTHERM_00015980	CPT	31.3742	31.2009	31.289	31.212	31.1217	31.0419	31.0783	log2.LFQ.int	0.00899722	0.150445	31.3742	31.0419	31.3742
TTHERM_00015980	ECT1.TTHERM_00015980	HP	31.4211	31.4532	31.516	31.4351	31.3017	31.3949	31.5315	log2.LFQ.int	0.00531269	0.0765667	31.5315	31.3017	31.5315
TTHERM_00015980	ECT1.TTHERM_00015980	HU	31.366	31.3506	31.3577	31.4693	31.5106	31.4834	31.4594	log2.LFQ.int	0.00471473	0.114509	31.5106	31.3506	31.5106
TTHERM_00015980	ECT1.TTHERM_00015980	IR	31.5364	31.4456	31.3705	31.3663	31.27	31.2998	31.3551	log2.LFQ.int	0.00676559	0.0805622	31.5364	31.27	31.5364
TTHERM_00015980	ECT1.TTHERM_00015980	MMS	31.4594	31.5648	31.609	31.5254	31.653	31.6498	31.4935	log2.LFQ.int	0.00563761	0.119915	31.653	31.4594	31.653
TTHERM_00015980	ECT1.TTHERM_00015980	NT1	31.4925	31.3895	31.47	31.3862	31.5181	31.5733	31.2626	log2.LFQ.int	0.00712012	0.117466	31.5733	31.2626	31.5733
TTHERM_00015980	ECT1.TTHERM_00015980	NT2	31.2429	31.3464	31.3565	31.3826	31.4248	31.4239	31.4149	log2.LFQ.int	0.00370139	0.0678957	31.4248	31.2429	31.4248
TTHERM_00015980	ECT1.TTHERM_00015980	NT3	31.4652	31.4159	31.3773	31.4631	31.4141	31.4754	31.4032	log2.LFQ.int	0.00241618	0.0554838	31.4754	31.3773	31.4754
TTHERM_00015980	ECT1.TTHERM_00015980	UV	31.4407	31.6076	31.4477	31.5057	31.3791	31.3007	31.3237	log2.LFQ.int	0.0079396	0.125313	31.6076	31.3007	31.6076
TTHERM_00016020	YPK1.TTHERM_00016020	CPT	25.2685	25.1872	25.2286	25.8104	25.3901	25.4622	25.3269	log2.LFQ.int	0.0966766	0.177574	25.8104	25.1872	25.8104
TTHERM_00016020	YPK1.TTHERM_00016020	HP	26.0586	25.8408	25.5704	26.0899	26.1259	26.0365	25.9482	log2.LFQ.int	0.0483588	0.179746	26.1259	25.5704	26.1259
TTHERM_00016020	YPK1.TTHERM_00016020	HU	25.8033	25.8621	26.0626	26.1407	25.8218	25.4555	25.461	log2.LFQ.int	0.0846363	0.330194	26.1407	25.4555	26.1407
TTHERM_00016020	YPK1.TTHERM_00016020	IR	25.5819	25.4141	25.9022	26.0763	25.901	25.9506	25.5393	log2.LFQ.int	0.120314	0.36582	26.0763	25.4141	26.0763
TTHERM_00016020	YPK1.TTHERM_00016020	MMS	26.0934	25.8728	25.7396	26.4888	25.8912	25.92	25.9711	log2.LFQ.int	0.075073	0.15026	26.4888	25.7396	26.4888
TTHERM_00016020	YPK1.TTHERM_00016020	NT1	25.8461	25.7524	25.7663	26.2767	26.0379	26.0327	25.9523	log2.LFQ.int	0.0480339	0.229098	26.2767	25.7524	26.2767
TTHERM_00016020	YPK1.TTHERM_00016020	NT2	25.4137	25.4175	25.4067	26.0234	25.503	25.3533	25.7551	log2.LFQ.int	0.0447103	0.218862	26.0234	25.3533	26.0234
TTHERM_00016020	YPK1.TTHERM_00016020	NT3	25.1908	25.4521	25.2799	25.8258	25.2977	25.2581	25.4463	log2.LFQ.int	0.0541339	0.180181	25.8258	25.1908	25.8258
TTHERM_00016020	YPK1.TTHERM_00016020	UV	25.2194	25.4012	25.5611	25.8212	25.4259	25.4351	25.4717	log2.LFQ.int	0.0882624	0.102863	25.8212	25.2194	25.8212
TTHERM_00016050	CUT1	CPT	26.6386	26.4526	25.983	26.0334	25.376	25.1591	25.2294	log2.LFQ.int	0.205944	0.940315	26.6386	25.1591	26.6386
TTHERM_00016050	CUT1	HP	26.1884	25.9333	25.7106	26.3951	26.4529	26.0962	26.448	log2.LFQ.int	0.0677432	0.406843	26.4529	25.7106	26.4529
TTHERM_00016050	CUT1	HU	27.2992	27.006	27.0146	26.6552	26.9084	26.5666	26.16	log2.LFQ.int	0.0732158	0.39939	27.2992	26.16	27.2992
TTHERM_00016050	CUT1	IR	27.1689	27.1979	27.3476	27.4209	27.4622	27.4765	27.1417	log2.LFQ.int	0.0283487	0.258187	27.4765	27.1417	27.4765
TTHERM_00016050	CUT1	MMS	26.1219	25.7784	25.9125	26.465	25.9204	26.4934	26.0256	log2.LFQ.int	0.0874383	0.376994	26.4934	25.7784	26.4934
TTHERM_00016050	CUT1	NT1	25.7208	25.8718	25.7992	26.425	25.7692	26.0803	25.9283	log2.LFQ.int	0.060047	0.220137	26.425	25.7208	26.425
TTHERM_00016050	CUT1	NT2	27.1491	27.0692	27.0547	27.1291	26.8728	27.128	26.9025	log2.LFQ.int	0.013685	0.149989	27.1491	26.8728	27.1491
TTHERM_00016050	CUT1	NT3	26.6361	26.5437	26.5885	25.604	26.3551	26.7073	26.4763	log2.LFQ.int	0.056517	0.196581	26.7073	25.604	26.7073
TTHERM_00016050	CUT1	UV	26.4047	26.265	26.3632	26.39	25.9276	25.4252	25.3586	log2.LFQ.int	0.145239	0.700173	26.4047	25.3586	26.4047
TTHERM_000160559	XPF1	CPT	25.1707	25.0988	25.662	27.2185	27.9375	28.5103	28.9497	log2.LFQ.int	0.323024	2.80758	28.9497	25.0988	28.9497
TTHERM_000160559	XPF1	HP	25.946	26.1567	25.6845	26.2024	25.9392	26.0354	26.1663	log2.LFQ.int	0.045608	0.218975	26.2024	25.6845	26.2024
TTHERM_000160559	XPF1	HU	25.4366	25.5571	25.3942	25.9619	25.7022	25.6086	25.425	log2.LFQ.int	0.0717256	0.224587	25.9619	25.3942	25.9619
TTHERM_000160559	XPF1	IR	25.597	25.5407	25.4682	25.9908	25.4627	25.6703	25.2346	log2.LFQ.int	0.133253	0.168221	25.9908	25.2346	25.9908
TTHERM_000160559	XPF1	MMS	25.8441	25.798	25.875	26.2617	25.7921	26.5166	26.8966	log2.LFQ.int	0.127906	0.568096	26.8966	25.7921	26.8966
TTHERM_000160559	XPF1	NT1	25.7937	26.1453	25.8431	26.4358	25.9283	26.0059	26.0873	log2.LFQ.int	0.0538456	0.230613	26.4358	25.7937	26.4358
TTHERM_000160559	XPF1	NT2	25.4677	25.6828	25.5177	25.9481	25.5694	25.5214	25.5839	log2.LFQ.int	0.0286516	0.113818	25.9481	25.4677	25.9481
TTHERM_000160559	XPF1	NT3	25.4262	25.3042	25.2845	25.7895	25.2219	25.5367	25.3908	log2.LFQ.int	0.0504748	0.18706	25.7895	25.2219	25.7895
TTHERM_000160559	XPF1	UV	25.3777	26.8853	27.7005	27.6326	27.8527	27.5173	27.1192	log2.LFQ.int	0.145604	0.664359	27.8527	25.3777	27.8527
TTHERM_00016060	YMR226C.TTHERM_00016060	CPT	35.7065	35.3964	34.87	34.1375	33.8729	33.8069	33.9602	log2.LFQ.int	0.0386691	1.21666	35.7065	33.8069	35.7065
TTHERM_00016060	YMR226C.TTHERM_00016060	HP	35.9318	35.7755	35.7888	35.5726	35.642	35.4805	35.5124	log2.LFQ.int	0.00739757	0.239671	35.9318	35.4805	35.9318
TTHERM_00016060	YMR226C.TTHERM_00016060	HU	35.587	35.4955	35.3847	35.5116	35.5042	35.5646	35.5774	log2.LFQ.int	0.00299804	0.0711889	35.587	35.3847	35.587
TTHERM_00016060	YMR226C.TTHERM_00016060	IR	35.575	35.4085	35.4274	35.529	35.523	35.5827	35.6415	log2.LFQ.int	0.00400377	0.103651	35.6415	35.4085	35.6415
TTHERM_00016060	YMR226C.TTHERM_00016060	MMS	36.0108	35.5898	35.1744	34.8076	34.6087	34.3256	34.2412	log2.LFQ.int	0.0327457	0.914955	36.0108	34.2412	36.0108
TTHERM_00016060	YMR226C.TTHERM_00016060	NT1	35.9493	35.9378	35.9225	35.9274	35.8712	35.805	35.8952	log2.LFQ.int	0.00205092	0.0494128	35.9493	35.805	35.9493
TTHERM_00016060	YMR226C.TTHERM_00016060	NT2	35.7094	35.6855	35.6657	35.6148	35.6059	35.6284	35.5855	log2.LFQ.int	0.00187794	0.0652452	35.7094	35.5855	35.7094
TTHERM_00016060	YMR226C.TTHERM_00016060	NT3	35.5982	35.5565	35.632	35.6313	35.6192	35.5546	35.6217	log2.LFQ.int	0.00136995	0.04909	35.632	35.5546	35.632
TTHERM_00016060	YMR226C.TTHERM_00016060	UV	35.6902	35.4475	35.3047	35.2872	35.2088	35.1953	35.1485	log2.LFQ.int	0.00836827	0.174016	35.6902	35.1485	35.6902
TTHERM_00016070	NA	CPT	25.3415	25.2715	25.208	25.758	25.5332	25.8407	26.236	log2.LFQ.int	0.150938	0.492798	26.236	25.208	26.236
TTHERM_00016070	NA	HP	26.0113	25.8863	25.6889	26.2212	25.8988	26.0585	25.9575	log2.LFQ.int	0.0434899	0.142294	26.2212	25.6889	26.2212
TTHERM_00016070	NA	HU	25.4955	25.441	25.5437	26.1021	25.3987	25.5403	25.4579	log2.LFQ.int	0.0715798	0.0925301	26.1021	25.3987	26.1021
TTHERM_00016070	NA	IR	25.5436	25.5238	25.5361	25.7787	25.5461	25.5273	25.3501	log2.LFQ.int	0.065521	0.0192653	25.7787	25.3501	25.7787
TTHERM_00016070	NA	MMS	25.854	25.9167	25.8777	26.22	25.8649	25.9129	25.8768	log2.LFQ.int	0.035072	0.0439359	26.22	25.854	26.22
TTHERM_00016070	NA	NT1	26.1266	25.9932	25.962	26.5494	25.9554	25.9848	25.8828	log2.LFQ.int	0.0468014	0.101159	26.5494	25.8828	26.5494
TTHERM_00016070	NA	NT2	25.4186	25.4562	25.4843	25.873	25.3759	25.4465	25.6306	log2.LFQ.int	0.0315617	0.124941	25.873	25.3759	25.873
TTHERM_00016070	NA	NT3	25.8803	25.3775	25.3608	25.885	25.7174	25.7246	25.8655	log2.LFQ.int	0.0517899	0.325495	25.885	25.3608	25.885
TTHERM_00016070	NA	UV	25.686	25.5839	26.1232	25.8354	26.3348	25.9629	25.9889	log2.LFQ.int	0.0918215	0.295313	26.3348	25.5839	26.3348
TTHERM_000160869	NA	CPT	27.8528	27.9512	27.7739	27.929	27.8224	27.7484	27.7462	log2.LFQ.int	0.0123465	0.129776	27.9512	27.7462	27.9512
TTHERM_000160869	NA	HP	27.6935	27.4924	27.9362	28.0303	27.4715	27.8853	27.8949	log2.LFQ.int	0.0301879	0.322618	28.0303	27.4715	28.0303
TTHERM_000160869	NA	HU	28.5384	28.3865	28.3183	28.5087	28.4294	28.5186	28.5841	log2.LFQ.int	0.0113846	0.120549	28.5841	28.3183	28.5841
TTHERM_000160869	NA	IR	28.437	28.2562	27.9428	28.1172	27.9654	28.2313	28.4237	log2.LFQ.int	0.0296703	0.298629	28.437	27.9428	28.437
TTHERM_000160869	NA	MMS	27.1854	28.0657	27.4925	27.4478	27.7731	27.6692	26.979	log2.LFQ.int	0.0628382	0.404572	28.0657	26.979	28.0657
TTHERM_000160869	NA	NT1	27.6616	27.9063	28.0872	27.6949	27.786	27.8267	27.8576	log2.LFQ.int	0.0188447	0.141459	28.0872	27.6616	28.0872
TTHERM_000160869	NA	NT2	28.5153	28.4165	28.5477	28.4147	28.3992	28.4994	28.7248	log2.LFQ.int	0.00995297	0.115843	28.7248	28.3992	28.7248
TTHERM_000160869	NA	NT3	27.7988	27.9387	27.8073	27.7678	27.8738	28.0988	27.891	log2.LFQ.int	0.0127481	0.111827	28.0988	27.7678	28.0988
TTHERM_000160869	NA	UV	27.8042	27.9339	27.8415	27.6576	27.4466	27.3725	27.5604	log2.LFQ.int	0.0348092	0.319298	27.9339	27.3725	27.9339
TTHERM_000160999	YNK1.TTHERM_000160999	CPT	35.4263	35.5482	35.4992	35.5264	35.4744	35.5281	35.5306	log2.LFQ.int	0.00185391	0.042566	35.5482	35.4263	35.5482
TTHERM_000160999	YNK1.TTHERM_000160999	HP	35.6623	35.7766	35.7594	35.9002	35.7741	35.6148	35.7109	log2.LFQ.int	0.00400166	0.088785	35.9002	35.6148	35.9002
TTHERM_000160999	YNK1.TTHERM_000160999	HU	35.3726	35.292	35.2136	35.242	35.2124	35.2813	35.1879	log2.LFQ.int	0.00288327	0.0736661	35.3726	35.1879	35.3726
TTHERM_000160999	YNK1.TTHERM_000160999	IR	35.2257	35.2331	35.1949	35.2686	35.3127	35.3287	35.4775	log2.LFQ.int	0.00436932	0.0912968	35.4775	35.1949	35.4775
TTHERM_000160999	YNK1.TTHERM_000160999	MMS	35.6982	35.6465	35.5909	35.5727	35.481	35.3822	35.4779	log2.LFQ.int	0.00514869	0.139207	35.6982	35.3822	35.6982
TTHERM_000160999	YNK1.TTHERM_000160999	NT1	35.774	35.8008	35.7622	35.8403	35.7229	35.6912	35.8446	log2.LFQ.int	0.00254205	0.0779741	35.8446	35.6912	35.8446
TTHERM_000160999	YNK1.TTHERM_000160999	NT2	35.3879	35.2473	35.2976	35.3884	35.4505	35.4582	35.4582	log2.LFQ.int	0.00335068	0.111555	35.4582	35.2473	35.4582
TTHERM_000160999	YNK1.TTHERM_000160999	NT3	35.3534	35.3477	35.4547	35.4622	35.4592	35.4876	35.618	log2.LFQ.int	0.00372251	0.0708603	35.618	35.3477	35.618
TTHERM_000160999	YNK1.TTHERM_000160999	UV	35.4762	35.2825	35.3183	35.1988	35.2448	35.3481	35.3727	log2.LFQ.int	0.00434178	0.0967872	35.4762	35.1988	35.4762
TTHERM_00016120	NA	CPT	27.7045	27.2406	27.0529	26.7567	26.679	26.2189	26.0186	log2.LFQ.int	0.123718	0.697797	27.7045	26.0186	27.7045
TTHERM_00016120	NA	HP	25.962	25.6898	25.884	26.2424	25.9623	25.9957	26.029	log2.LFQ.int	0.0418187	0.0893416	26.2424	25.6898	26.2424
TTHERM_00016120	NA	HU	27.5859	27.3995	27.3546	27.3066	27.2679	26.8768	27.4307	log2.LFQ.int	0.0333442	0.127864	27.5859	26.8768	27.5859
TTHERM_00016120	NA	IR	26.9533	27.1126	27.0401	27.0927	27.1156	27.5861	27.5133	log2.LFQ.int	0.0468719	0.24804	27.5861	26.9533	27.5861
TTHERM_00016120	NA	MMS	25.8385	26.0543	25.6164	26.2921	25.8157	25.7824	26.1088	log2.LFQ.int	0.0828196	0.282539	26.2921	25.6164	26.2921
TTHERM_00016120	NA	NT1	26.0422	25.8552	26.8518	26.5048	25.8828	26.0016	25.8875	log2.LFQ.int	0.0832629	0.38834	26.8518	25.8552	26.8518
TTHERM_00016120	NA	NT2	27.5322	27.619	27.6434	27.5766	27.6195	27.4434	27.5191	log2.LFQ.int	0.00793653	0.0935967	27.6434	27.4434	27.6434
TTHERM_00016120	NA	NT3	27.6677	27.4903	27.64	26.723	27.5807	27.5475	27.1063	log2.LFQ.int	0.0422659	0.312042	27.6677	26.723	27.6677
TTHERM_00016120	NA	UV	27.2811	27.0593	26.281	25.7613	26.7241	27.0782	27.36	log2.LFQ.int	0.125823	0.67711	27.36	25.7613	27.36
TTHERM_000161459	NA	CPT	28.8389	28.5738	28.0258	27.6506	27.0933	28.1387	28.0633	log2.LFQ.int	0.0791515	0.518068	28.8389	27.0933	28.8389
TTHERM_000161459	NA	HP	29.6799	29.6201	29.513	29.3116	29.4257	29.7858	29.904	log2.LFQ.int	0.0195124	0.263529	29.904	29.3116	29.904
TTHERM_000161459	NA	HU	28.7246	29.0243	29.2719	29.3953	29.3663	29.3431	29.25	log2.LFQ.int	0.02279	0.217537	29.3953	28.7246	29.3953
TTHERM_000161459	NA	IR	28.8625	29.0041	29.0064	28.9976	29.1892	29.2714	29.3072	log2.LFQ.int	0.0192312	0.229496	29.3072	28.8625	29.3072
TTHERM_000161459	NA	MMS	29.4742	29.5655	29.3251	29.5044	29.4041	29.6855	29.908	log2.LFQ.int	0.0193776	0.186334	29.908	29.3251	29.908
TTHERM_000161459	NA	NT1	29.5609	29.8938	29.7263	29.7372	29.8286	29.9866	29.8856	log2.LFQ.int	0.0123759	0.157994	29.9866	29.5609	29.9866
TTHERM_000161459	NA	NT2	28.7439	28.9048	29.1293	29.2308	29.1345	29.2162	29.0769	log2.LFQ.int	0.0144177	0.184478	29.2308	28.7439	29.2308
TTHERM_000161459	NA	NT3	28.9577	28.8066	28.919	28.909	29.0101	28.8812	28.8872	log2.LFQ.int	0.00604207	0.0541334	29.0101	28.8066	29.0101
TTHERM_000161459	NA	UV	28.8059	28.7361	28.7609	28.8929	29.0592	29.4958	29.4087	log2.LFQ.int	0.0343399	0.45057	29.4958	28.7361	29.4958
TTHERM_000161539	NA	CPT	25.4606	25.3271	25.2094	25.8738	25.5	25.1681	25.1995	log2.LFQ.int	0.115729	0.275858	25.8738	25.1681	25.8738
TTHERM_000161539	NA	HP	25.9072	25.9749	25.8062	26.3252	25.7132	26.0005	25.9917	log2.LFQ.int	0.0489033	0.139393	26.3252	25.7132	26.3252
TTHERM_000161539	NA	HU	25.6892	25.4996	25.4045	25.9926	25.385	25.4449	25.6688	log2.LFQ.int	0.0772398	0.254289	25.9926	25.385	25.9926
TTHERM_000161539	NA	IR	25.3711	25.4092	25.8915	25.9805	25.5741	25.382	25.6388	log2.LFQ.int	0.139227	0.369516	25.9805	25.3711	25.9805
TTHERM_000161539	NA	MMS	25.8012	25.8204	25.7686	26.3655	25.9912	25.8722	26.1979	log2.LFQ.int	0.0758413	0.283744	26.3655	25.7686	26.3655
TTHERM_000161539	NA	NT1	25.825	25.9876	25.9075	26.306	26.0413	26.0901	25.9868	log2.LFQ.int	0.0375387	0.118551	26.306	25.825	26.306
TTHERM_000161539	NA	NT2	25.3314	25.7036	25.5242	25.924	25.8363	25.5557	25.3987	log2.LFQ.int	0.0442899	0.308456	25.924	25.3314	25.924
TTHERM_000161539	NA	NT3	25.239	25.1905	25.2851	25.6937	25.4106	25.4011	25.2627	log2.LFQ.int	0.0447527	0.154984	25.6937	25.1905	25.6937
TTHERM_000161539	NA	UV	25.7597	25.3459	26.0958	26.3315	25.8305	25.9175	26.257	log2.LFQ.int	0.117781	0.381331	26.3315	25.3459	26.3315
TTHERM_00016170	HHT3	CPT	26.8575	27.6822	28.0612	25.6793	28.1816	27.1055	27.2689	log2.LFQ.int	0.146733	0.89022	28.1816	25.6793	28.1816
TTHERM_00016170	HHT3	HP	26.8706	27.0909	26.5693	27.2425	26.9808	26.7994	26.0215	log2.LFQ.int	0.0721831	0.351525	27.2425	26.0215	27.2425
TTHERM_00016170	HHT3	HU	25.451	25.5746	25.4176	25.9217	25.5681	25.5835	25.6494	log2.LFQ.int	0.0563421	0.106871	25.9217	25.4176	25.9217
TTHERM_00016170	HHT3	IR	25.5955	25.6398	25.4962	26.0504	25.3968	25.2923	25.5514	log2.LFQ.int	0.134168	0.171143	26.0504	25.2923	26.0504
TTHERM_00016170	HHT3	MMS	25.6778	25.6294	26.0021	26.2501	25.8864	26.0614	25.8795	log2.LFQ.int	0.07904	0.253094	26.2501	25.6294	26.2501
TTHERM_00016170	HHT3	NT1	25.6423	26.0325	25.8214	26.3566	25.9901	26.1061	26.1229	log2.LFQ.int	0.0579706	0.20872	26.3566	25.6423	26.3566
TTHERM_00016170	HHT3	NT2	25.4763	25.2878	25.6077	26.0511	25.5472	25.4541	25.5654	log2.LFQ.int	0.0426738	0.121375	26.0511	25.2878	26.0511
TTHERM_00016170	HHT3	NT3	25.3388	25.2074	25.4381	25.7195	25.3887	25.2212	25.4014	log2.LFQ.int	0.0448699	0.139806	25.7195	25.2074	25.7195
TTHERM_00016170	HHT3	UV	25.136	25.3183	25.454	25.9972	25.3418	25.4757	25.4545	log2.LFQ.int	0.125237	0.135082	25.9972	25.136	25.9972
TTHERM_000161759	TIS11.TTHERM_000161759	CPT	28.4841	28.9233	28.8461	28.9364	28.9277	28.4434	28.1726	log2.LFQ.int	0.0348534	0.461768	28.9364	28.1726	28.9364
TTHERM_000161759	TIS11.TTHERM_000161759	HP	28.4406	27.8934	28.2954	28.7251	28.5532	28.8513	28.6415	log2.LFQ.int	0.0360591	0.315306	28.8513	27.8934	28.8513
TTHERM_000161759	TIS11.TTHERM_000161759	HU	28.5388	28.438	28.6008	28.5391	28.5124	28.3369	28.3877	log2.LFQ.int	0.0114046	0.126122	28.6008	28.3369	28.6008
TTHERM_000161759	TIS11.TTHERM_000161759	IR	28.9008	28.5633	29.1997	28.9211	28.8358	28.4833	28.4597	log2.LFQ.int	0.0345009	0.387642	29.1997	28.4597	29.1997
TTHERM_000161759	TIS11.TTHERM_000161759	MMS	28.287	28.2657	28.3912	28.7582	28.7876	29.1562	29.2937	log2.LFQ.int	0.0505482	0.632854	29.2937	28.2657	29.2937
TTHERM_000161759	TIS11.TTHERM_000161759	NT1	27.9858	28.1688	28.4164	27.1397	27.687	27.8715	27.7145	log2.LFQ.int	0.053565	0.376533	28.4164	27.1397	28.4164
TTHERM_000161759	TIS11.TTHERM_000161759	NT2	28.17	28.4598	28.3499	28.4862	28.25	28.0865	28.0811	log2.LFQ.int	0.0165918	0.276632	28.4862	28.0811	28.4862
TTHERM_000161759	TIS11.TTHERM_000161759	NT3	28.4913	28.6259	28.635	28.3523	28.3908	28.4203	28.4157	log2.LFQ.int	0.0115235	0.155335	28.635	28.3523	28.635
TTHERM_000161759	TIS11.TTHERM_000161759	UV	28.8533	28.8771	28.9025	29.2095	29.1864	29.3117	29.1643	log2.LFQ.int	0.0206209	0.308079	29.3117	28.8533	29.3117
TTHERM_00016270	MRPL51.TTHERM_00016270	CPT	30.2438	30.2605	30.3035	30.2483	30.1263	30.0617	29.9735	log2.LFQ.int	0.0105676	0.160432	30.3035	29.9735	30.3035
TTHERM_00016270	MRPL51.TTHERM_00016270	HP	30.7368	30.6788	30.7231	30.6505	30.9774	31.0211	31.0319	log2.LFQ.int	0.012506	0.298278	31.0319	30.6505	31.0319
TTHERM_00016270	MRPL51.TTHERM_00016270	HU	30.5412	30.566	30.5152	30.5125	30.3651	30.2713	30.1348	log2.LFQ.int	0.0130294	0.209991	30.566	30.1348	30.566
TTHERM_00016270	MRPL51.TTHERM_00016270	IR	30.5223	30.5735	30.6087	30.7886	30.904	30.7101	30.5887	log2.LFQ.int	0.0116073	0.168288	30.904	30.5223	30.904
TTHERM_00016270	MRPL51.TTHERM_00016270	MMS	30.5424	30.7443	30.7187	30.8041	30.6098	30.7643	30.7873	log2.LFQ.int	0.00778284	0.111543	30.8041	30.5424	30.8041
TTHERM_00016270	MRPL51.TTHERM_00016270	NT1	30.7868	30.761	30.8409	30.9413	30.767	30.6568	30.3866	log2.LFQ.int	0.012466	0.104967	30.9413	30.3866	30.9413
TTHERM_00016270	MRPL51.TTHERM_00016270	NT2	30.6169	30.5961	30.5324	30.6914	30.5299	30.3724	30.2827	log2.LFQ.int	0.00967288	0.155371	30.6914	30.2827	30.6914
TTHERM_00016270	MRPL51.TTHERM_00016270	NT3	30.2362	30.2024	30.2148	30.2477	30.1269	30.0565	30.0414	log2.LFQ.int	0.00657157	0.133842	30.2477	30.0414	30.2477
TTHERM_00016270	MRPL51.TTHERM_00016270	UV	30.2417	30.0822	30.1302	30.2913	30.2323	30.0949	30.0497	log2.LFQ.int	0.00847837	0.148489	30.2913	30.0497	30.2913
TTHERM_00016280	YML131W.TTHERM_00016280	CPT	31.2877	31.1936	30.5659	29.6779	29.5661	29.5334	29.5069	log2.LFQ.int	0.067461	1.32999	31.2877	29.5069	31.2877
TTHERM_00016280	YML131W.TTHERM_00016280	HP	31.5516	31.4112	31.2767	31.1283	31.2609	31.2713	31.3379	log2.LFQ.int	0.00916936	0.108442	31.5516	31.1283	31.5516
TTHERM_00016280	YML131W.TTHERM_00016280	HU	31.758	31.8528	31.8544	31.8905	31.9419	31.9801	31.9651	log2.LFQ.int	0.0051924	0.0999391	31.9801	31.758	31.9801
TTHERM_00016280	YML131W.TTHERM_00016280	IR	31.5441	31.4877	31.4981	31.5103	31.5386	31.7391	31.8582	log2.LFQ.int	0.00963659	0.137391	31.8582	31.4877	31.8582
TTHERM_00016280	YML131W.TTHERM_00016280	MMS	31.6572	31.2951	30.9907	30.9974	30.8236	30.8979	30.9685	log2.LFQ.int	0.0205602	0.213001	31.6572	30.8236	31.6572
TTHERM_00016280	YML131W.TTHERM_00016280	NT1	31.5551	31.4841	31.5094	31.6562	31.5956	31.7108	31.8622	log2.LFQ.int	0.00876208	0.151213	31.8622	31.4841	31.8622
TTHERM_00016280	YML131W.TTHERM_00016280	NT2	31.7698	31.8257	31.8318	31.9333	31.8987	31.8917	31.9353	log2.LFQ.int	0.00358339	0.0872631	31.9353	31.7698	31.9353
TTHERM_00016280	YML131W.TTHERM_00016280	NT3	31.4704	31.5062	31.4488	31.4533	31.5537	31.589	31.5709	log2.LFQ.int	0.00378248	0.10043	31.589	31.4488	31.589
TTHERM_00016280	YML131W.TTHERM_00016280	UV	31.4787	31.2803	31.2461	31.1544	31.2611	31.4059	31.396	log2.LFQ.int	0.00851062	0.147327	31.4787	31.1544	31.4787
TTHERM_00016340	NA	CPT	25.159	25.4003	25.305	25.7702	25.1781	25.2242	25.3671	log2.LFQ.int	0.0988812	0.182571	25.7702	25.159	25.7702
TTHERM_00016340	NA	HP	25.8612	26.7376	27.2747	26.1307	27.2619	26.7846	27.1341	log2.LFQ.int	0.103996	0.763853	27.2747	25.8612	27.2747
TTHERM_00016340	NA	HU	27.4798	27.5401	27.7156	26.0476	27.5473	27.282	26.9884	log2.LFQ.int	0.0860083	0.408497	27.7156	26.0476	27.7156
TTHERM_00016340	NA	IR	25.4092	25.5252	25.4145	25.9386	25.5818	25.4522	25.4968	log2.LFQ.int	0.0968852	0.120115	25.9386	25.4092	25.9386
TTHERM_00016340	NA	MMS	25.8217	27.4639	27.3639	27.1023	27.8774	27.321	25.9417	log2.LFQ.int	0.155084	0.891912	27.8774	25.8217	27.8774
TTHERM_00016340	NA	NT1	25.7179	25.9631	27.1925	26.5439	27.0892	26.0006	25.9057	log2.LFQ.int	0.128062	0.882152	27.1925	25.7179	27.1925
TTHERM_00016340	NA	NT2	26.7457	26.8835	26.3415	25.807	27.1868	27.4558	27.2907	log2.LFQ.int	0.0779434	0.695125	27.4558	25.807	27.4558
TTHERM_00016340	NA	NT3	25.2625	25.2649	25.3237	25.7987	25.2578	25.3974	25.2596	log2.LFQ.int	0.0437564	0.0994909	25.7987	25.2578	25.7987
TTHERM_00016340	NA	UV	25.0431	25.2208	25.3397	25.6291	25.402	25.4765	25.3318	log2.LFQ.int	0.108954	0.162945	25.6291	25.0431	25.6291
TTHERM_00016360	BBC53	CPT	33.6788	33.693	33.7391	33.8416	33.6943	33.6628	33.6196	log2.LFQ.int	0.00363717	0.045923	33.8416	33.6196	33.8416
TTHERM_00016360	BBC53	HP	33.5623	33.6113	33.5767	33.4904	33.5909	33.6384	33.5904	log2.LFQ.int	0.00237758	0.0316111	33.6384	33.4904	33.6384
TTHERM_00016360	BBC53	HU	33.7148	33.7287	33.686	33.7231	33.684	33.7811	33.6618	log2.LFQ.int	0.00207889	0.0408764	33.7811	33.6618	33.7811
TTHERM_00016360	BBC53	IR	33.7294	33.7269	33.766	33.7641	33.8039	33.6764	33.6356	log2.LFQ.int	0.00326231	0.0633665	33.8039	33.6356	33.8039
TTHERM_00016360	BBC53	MMS	33.6838	33.6353	33.5931	33.7973	33.7727	33.7453	33.7258	log2.LFQ.int	0.00420154	0.0994502	33.7973	33.5931	33.7973
TTHERM_00016360	BBC53	NT1	33.6093	33.7379	33.7079	33.7698	33.74	33.7777	33.774	log2.LFQ.int	0.00280644	0.0489763	33.7777	33.6093	33.7777
TTHERM_00016360	BBC53	NT2	33.7752	33.6878	33.734	33.7014	33.6333	33.5586	33.5609	log2.LFQ.int	0.00407334	0.120586	33.7752	33.5586	33.7752
TTHERM_00016360	BBC53	NT3	33.5913	33.572	33.5271	33.6345	33.5499	33.5716	33.4651	log2.LFQ.int	0.0026831	0.0431692	33.6345	33.4651	33.6345
TTHERM_00016360	BBC53	UV	33.5311	33.5272	33.4809	33.4194	33.3469	33.3075	33.1613	log2.LFQ.int	0.00769615	0.176792	33.5311	33.1613	33.5311
TTHERM_00016370	YNL035C.TTHERM_00016370	CPT	27.2677	27.3044	27.1341	26.8144	27.2487	27.0116	27.0918	log2.LFQ.int	0.0313988	0.206508	27.3044	26.8144	27.3044
TTHERM_00016370	YNL035C.TTHERM_00016370	HP	27.6498	27.6385	27.8041	26.9853	27.7439	27.8605	27.8761	log2.LFQ.int	0.0368927	0.188137	27.8761	26.9853	27.8761
TTHERM_00016370	YNL035C.TTHERM_00016370	HU	27.5238	27.3484	27.4069	26.8067	27.1077	26.9969	26.9103	log2.LFQ.int	0.0482693	0.424052	27.5238	26.8067	27.5238
TTHERM_00016370	YNL035C.TTHERM_00016370	IR	27.5018	27.8753	27.9512	27.9895	27.9099	27.5069	27.2116	log2.LFQ.int	0.0494372	0.426226	27.9895	27.2116	27.9895
TTHERM_00016370	YNL035C.TTHERM_00016370	MMS	27.6349	27.1672	26.5958	26.9258	27.4218	27.6723	27.385	log2.LFQ.int	0.0723373	0.48188	27.6723	26.5958	27.6723
TTHERM_00016370	YNL035C.TTHERM_00016370	NT1	27.1087	27.1262	27.1981	27.1101	27.1124	26.9932	26.5972	log2.LFQ.int	0.0278245	0.0683293	27.1981	26.5972	27.1981
TTHERM_00016370	YNL035C.TTHERM_00016370	NT2	27.6603	27.4645	27.5746	27.6387	27.3016	27.3169	27.0651	log2.LFQ.int	0.0250332	0.297402	27.6603	27.0651	27.6603
TTHERM_00016370	YNL035C.TTHERM_00016370	NT3	27.3162	27.478	27.4491	27.6281	27.4985	27.3182	26.905	log2.LFQ.int	0.0286923	0.171014	27.6281	26.905	27.6281
TTHERM_00016370	YNL035C.TTHERM_00016370	UV	27.3772	27.4852	27.445	27.4479	27.4378	27.4553	27.0355	log2.LFQ.int	0.0212533	0.0441405	27.4852	27.0355	27.4852
TTHERM_00016460	URA6.TTHERM_00016460	CPT	28.2914	28.2418	28.2507	27.9675	28.0723	28.0626	28.0325	log2.LFQ.int	0.0171095	0.198703	28.2914	27.9675	28.2914
TTHERM_00016460	URA6.TTHERM_00016460	HP	29.6007	29.2825	29.2756	29.1118	29.2568	29.3791	29.2383	log2.LFQ.int	0.0137301	0.0832382	29.6007	29.1118	29.6007
TTHERM_00016460	URA6.TTHERM_00016460	HU	28.1825	28.4168	28.4452	27.9862	28.5569	28.5463	28.6273	log2.LFQ.int	0.0272679	0.251981	28.6273	27.9862	28.6273
TTHERM_00016460	URA6.TTHERM_00016460	IR	28.0881	28.1106	28.3342	28.2644	28.4334	28.4944	28.567	log2.LFQ.int	0.0267405	0.276433	28.567	28.0881	28.567
TTHERM_00016460	URA6.TTHERM_00016460	MMS	29.3197	29.363	29.1716	29.1899	29.1671	29.1441	28.9326	log2.LFQ.int	0.0144834	0.0991874	29.363	28.9326	29.363
TTHERM_00016460	URA6.TTHERM_00016460	NT1	29.1294	29.0829	29.0207	29.1838	29.2596	29.0709	29.055	log2.LFQ.int	0.0082345	0.093655	29.2596	29.0207	29.2596
TTHERM_00016460	URA6.TTHERM_00016460	NT2	28.3983	28.5227	28.4683	28.5246	28.546	28.6427	28.7125	log2.LFQ.int	0.00967801	0.0988621	28.7125	28.3983	28.7125
TTHERM_00016460	URA6.TTHERM_00016460	NT3	28.5639	28.5705	28.5324	28.7436	28.5992	28.8161	28.6827	log2.LFQ.int	0.0105755	0.145959	28.8161	28.5324	28.8161
TTHERM_00016460	URA6.TTHERM_00016460	UV	28.5884	28.6155	28.3981	28.7422	28.6425	29.1408	29.3892	log2.LFQ.int	0.0397692	0.339518	29.3892	28.3981	29.3892
TTHERM_00016480	NA	CPT	25.1303	25.2347	25.3418	25.7901	25.4149	25.1965	25.2776	log2.LFQ.int	0.103324	0.162767	25.7901	25.1303	25.7901
TTHERM_00016480	NA	HP	26.0857	25.8425	25.6201	26.2811	26.0025	26.0899	25.8909	log2.LFQ.int	0.0562114	0.221146	26.2811	25.6201	26.2811
TTHERM_00016480	NA	HU	25.5339	25.5508	25.4297	26.0254	25.5801	25.519	25.6262	log2.LFQ.int	0.0593519	0.0766779	26.0254	25.4297	26.0254
TTHERM_00016480	NA	IR	25.4217	25.3907	25.5928	25.9503	25.6883	25.602	25.6388	log2.LFQ.int	0.101584	0.156313	25.9503	25.3907	25.9503
TTHERM_00016480	NA	MMS	25.7472	25.9154	25.8747	26.3252	25.8873	25.8971	26.0701	log2.LFQ.int	0.0598502	0.111775	26.3252	25.7472	26.3252
TTHERM_00016480	NA	NT1	26.0283	26.0092	26.0238	26.3723	25.929	25.8948	26.2012	log2.LFQ.int	0.0393498	0.145641	26.3723	25.8948	26.3723
TTHERM_00016480	NA	NT2	25.725	25.7379	25.6441	25.9925	25.5181	25.4831	25.5975	log2.LFQ.int	0.0320279	0.17366	25.9925	25.4831	25.9925
TTHERM_00016480	NA	NT3	25.1376	25.0634	25.2156	25.9867	25.4701	25.2548	25.4563	log2.LFQ.int	0.0819509	0.286595	25.9867	25.0634	25.9867
TTHERM_00016480	NA	UV	25.3107	25.3625	25.3283	25.7869	25.1826	25.221	25.2143	log2.LFQ.int	0.103847	0.127722	25.7869	25.1826	25.7869
TTHERM_00016490	SEC22.TTHERM_00016490	CPT	28.5611	28.5945	28.7199	28.878	29.06	29.3039	29.2871	log2.LFQ.int	0.0353065	0.516378	29.3039	28.5611	29.3039
TTHERM_00016490	SEC22.TTHERM_00016490	HP	28.692	28.8506	27.9093	28.7534	28.8633	28.8012	29.0056	log2.LFQ.int	0.0326342	0.134246	29.0056	27.9093	29.0056
TTHERM_00016490	SEC22.TTHERM_00016490	HU	28.6845	28.5744	28.587	28.5086	28.5166	28.6799	28.5534	log2.LFQ.int	0.00826437	0.0984325	28.6845	28.5086	28.6845
TTHERM_00016490	SEC22.TTHERM_00016490	IR	28.5607	28.6085	28.6827	28.4877	28.5253	28.5352	28.4874	log2.LFQ.int	0.00914696	0.0780867	28.6827	28.4874	28.6827
TTHERM_00016490	SEC22.TTHERM_00016490	MMS	28.644	28.5715	28.3184	28.82	28.7829	28.7961	29.0615	log2.LFQ.int	0.0278245	0.200297	29.0615	28.3184	29.0615
TTHERM_00016490	SEC22.TTHERM_00016490	NT1	28.5833	28.4868	28.6292	28.827	28.4551	28.7466	28.5318	log2.LFQ.int	0.015327	0.178575	28.827	28.4551	28.827
TTHERM_00016490	SEC22.TTHERM_00016490	NT2	28.5817	28.5297	28.6244	28.515	28.6884	28.5157	28.6051	log2.LFQ.int	0.00594764	0.0920661	28.6884	28.515	28.6884
TTHERM_00016490	SEC22.TTHERM_00016490	NT3	28.3869	28.4211	28.3037	28.5368	28.5247	28.3662	28.4322	log2.LFQ.int	0.00886709	0.101899	28.5368	28.3037	28.5368
TTHERM_00016490	SEC22.TTHERM_00016490	UV	28.7731	28.5279	28.3618	28.339	28.347	28.3433	28.2637	log2.LFQ.int	0.0198861	0.103677	28.7731	28.2637	28.7731
TTHERM_00016530	NA	CPT	28.0263	28.4023	28.7285	28.7324	28.8296	28.815	28.7858	log2.LFQ.int	0.0314519	0.235039	28.8296	28.0263	28.8296
TTHERM_00016530	NA	HP	27.9843	27.9942	27.9132	27.5197	27.8682	27.8564	27.7602	log2.LFQ.int	0.0206607	0.140418	27.9942	27.5197	27.9942
TTHERM_00016530	NA	HU	28.0964	27.7827	27.7853	27.7333	27.5189	27.5778	27.5478	log2.LFQ.int	0.0279808	0.221178	28.0964	27.5189	28.0964
TTHERM_00016530	NA	IR	28.0519	27.9542	28.1204	28.0362	28.0508	27.924	27.668	log2.LFQ.int	0.021357	0.112246	28.1204	27.668	28.1204
TTHERM_00016530	NA	MMS	27.7054	27.9835	27.7164	27.8708	27.9472	27.8228	27.9226	log2.LFQ.int	0.0169458	0.165289	27.9835	27.7054	27.9835
TTHERM_00016530	NA	NT1	27.948	27.7735	27.8136	27.8844	27.8676	27.1751	27.5436	log2.LFQ.int	0.0339538	0.217448	27.948	27.1751	27.948
TTHERM_00016530	NA	NT2	28.2398	27.9568	27.7826	27.9112	27.7177	27.4845	27.8479	log2.LFQ.int	0.0241877	0.183872	28.2398	27.4845	28.2398
TTHERM_00016530	NA	NT3	28.2903	28.2142	27.9765	27.4265	28.0075	28.1436	27.9081	log2.LFQ.int	0.0308728	0.236632	28.2903	27.4265	28.2903
TTHERM_00016530	NA	UV	27.9491	28.2579	28.4579	28.4809	28.3873	27.9734	28.1978	log2.LFQ.int	0.029804	0.33697	28.4809	27.9491	28.4809
TTHERM_00016590	CTH89	CPT	28.403	28.3963	29.1587	29.6112	30.0074	30.7944	31.1654	log2.LFQ.int	0.107264	1.62006	31.1654	28.3963	31.1654
TTHERM_00016590	CTH89	HP	27.995	27.1768	27.0248	26.9071	27.2712	27.1584	27.5429	log2.LFQ.int	0.055182	0.315436	27.995	26.9071	27.995
TTHERM_00016590	CTH89	HU	28.2523	28.4245	28.4717	28.7026	28.766	28.8287	28.8063	log2.LFQ.int	0.0258188	0.338048	28.8287	28.2523	28.8287
TTHERM_00016590	CTH89	IR	27.6112	27.6675	27.7764	27.8086	27.9596	28.1003	28.1486	log2.LFQ.int	0.0343405	0.307993	28.1486	27.6112	28.1486
TTHERM_00016590	CTH89	MMS	27.9622	27.2071	27.8151	27.194	27.8472	28.4905	28.8968	log2.LFQ.int	0.0932253	0.715234	28.8968	27.194	28.8968
TTHERM_00016590	CTH89	NT1	27.8428	27.4798	27.6837	27.0474	27.3052	27.3196	28.3557	log2.LFQ.int	0.0611404	0.450862	28.3557	27.0474	28.3557
TTHERM_00016590	CTH89	NT2	28.2234	28.2043	28.377	28.2891	28.339	28.3171	28.663	log2.LFQ.int	0.0132358	0.101713	28.663	28.2043	28.663
TTHERM_00016590	CTH89	NT3	28.4125	28.0908	28.2635	27.1147	28.4813	28.3944	28.4038	log2.LFQ.int	0.0430753	0.230959	28.4813	27.1147	28.4813
TTHERM_00016590	CTH89	UV	27.803	28.1437	28.7489	28.9416	29.0005	29.1616	29.4438	log2.LFQ.int	0.0688132	0.634777	29.4438	27.803	29.4438
TTHERM_00016600	MAP1.TTHERM_00016600	CPT	30.3878	30.4471	30.5383	30.6298	30.6067	30.7606	30.718	log2.LFQ.int	0.0114574	0.181228	30.7606	30.3878	30.7606
TTHERM_00016600	MAP1.TTHERM_00016600	HP	30.747	30.8466	30.7652	30.6348	30.8477	31.0855	31.0261	log2.LFQ.int	0.0119309	0.180802	31.0855	30.6348	31.0855
TTHERM_00016600	MAP1.TTHERM_00016600	HU	30.8532	30.9866	30.8604	30.8139	30.7731	30.7481	30.6557	log2.LFQ.int	0.00800802	0.0961464	30.9866	30.6557	30.9866
TTHERM_00016600	MAP1.TTHERM_00016600	IR	30.9505	31.1099	31.1928	31.2387	31.2204	31.0369	30.8613	log2.LFQ.int	0.0116908	0.212943	31.2387	30.8613	31.2387
TTHERM_00016600	MAP1.TTHERM_00016600	MMS	30.6925	30.656	30.4563	30.1828	30.3639	29.9903	29.8934	log2.LFQ.int	0.0280303	0.469622	30.6925	29.8934	30.6925
TTHERM_00016600	MAP1.TTHERM_00016600	NT1	30.8048	30.6455	30.6843	30.594	30.5358	30.449	30.4256	log2.LFQ.int	0.0106297	0.17248	30.8048	30.4256	30.8048
TTHERM_00016600	MAP1.TTHERM_00016600	NT2	30.8883	30.9556	30.8272	30.7623	30.6818	30.6914	30.5762	log2.LFQ.int	0.00886431	0.171195	30.9556	30.5762	30.9556
TTHERM_00016600	MAP1.TTHERM_00016600	NT3	30.7907	30.7333	30.719	30.7109	30.5127	30.6232	30.4908	log2.LFQ.int	0.00824002	0.1582	30.7907	30.4908	30.7907
TTHERM_00016600	MAP1.TTHERM_00016600	UV	30.7838	30.8964	31.1288	31.3004	31.283	31.306	31.2187	log2.LFQ.int	0.0155004	0.27906	31.306	30.7838	31.306
TTHERM_000181088	ROT2.TTHERM_000181088	CPT	27.4875	27.3411	27.1121	27.226	27.343	27.4247	27.655	log2.LFQ.int	0.0301521	0.172515	27.655	27.1121	27.655
TTHERM_000181088	ROT2.TTHERM_000181088	HP	27.8517	27.5016	26.7018	27.1963	27.3317	26.7281	26.7744	log2.LFQ.int	0.0726027	0.665392	27.8517	26.7018	27.8517
TTHERM_000181088	ROT2.TTHERM_000181088	HU	27.5114	27.3797	27.3686	27.5724	27.4298	27.5091	27.5527	log2.LFQ.int	0.0129535	0.127307	27.5724	27.3686	27.5724
TTHERM_000181088	ROT2.TTHERM_000181088	IR	27.5665	27.4532	27.4558	27.6656	27.3066	27.5065	27.578	log2.LFQ.int	0.0209522	0.117761	27.6656	27.3066	27.6656
TTHERM_000181088	ROT2.TTHERM_000181088	MMS	27.9379	27.7951	27.6645	27.3684	27.3052	26.7232	26.3726	log2.LFQ.int	0.10426	0.71559	27.9379	26.3726	27.9379
TTHERM_000181088	ROT2.TTHERM_000181088	NT1	27.6443	27.8167	27.7929	27.5901	27.7294	27.6461	27.6262	log2.LFQ.int	0.0121256	0.125871	27.8167	27.5901	27.8167
TTHERM_000181088	ROT2.TTHERM_000181088	NT2	27.4214	27.5874	27.4283	27.5574	27.6331	27.5973	27.6204	log2.LFQ.int	0.00950393	0.115961	27.6331	27.4214	27.6331
TTHERM_000181088	ROT2.TTHERM_000181088	NT3	27.3969	27.5224	27.3048	27.5481	27.4614	27.4797	27.5071	log2.LFQ.int	0.0106857	0.0855577	27.5481	27.3048	27.5481
TTHERM_000181088	ROT2.TTHERM_000181088	UV	27.2573	27.0965	27.0846	27.2383	27.4183	27.3709	27.3512	log2.LFQ.int	0.0243495	0.19362	27.4183	27.0846	27.4183
TTHERM_000186039	NA	CPT	29.6901	29.7052	29.6561	29.7839	29.6076	29.5969	29.5872	log2.LFQ.int	0.00682853	0.0954364	29.7839	29.5872	29.7839
TTHERM_000186039	NA	HP	30.3194	30.2603	30.4169	30.2797	30.0104	30.0313	30.2691	log2.LFQ.int	0.0119597	0.153747	30.4169	30.0104	30.4169
TTHERM_000186039	NA	HU	29.8333	29.8948	29.7433	29.8769	29.7827	29.7197	29.7049	log2.LFQ.int	0.00710845	0.12356	29.8948	29.7049	29.8948
TTHERM_000186039	NA	IR	29.6154	29.6575	29.6905	29.6858	29.7132	29.9142	30.0089	log2.LFQ.int	0.0139106	0.142029	30.0089	29.6154	30.0089
TTHERM_000186039	NA	MMS	30.1242	30.3375	30.3469	30.5673	30.4784	30.5523	30.4792	log2.LFQ.int	0.0130354	0.173496	30.5673	30.1242	30.5673
TTHERM_000186039	NA	NT1	30.2775	30.3958	30.3448	30.4467	30.3741	30.4258	30.2272	log2.LFQ.int	0.00645543	0.0996313	30.4467	30.2272	30.4467
TTHERM_000186039	NA	NT2	29.9065	29.8026	29.896	30.0094	30.0003	29.9384	29.9314	log2.LFQ.int	0.0050752	0.0681359	30.0094	29.8026	30.0094
TTHERM_000186039	NA	NT3	29.5642	29.6093	29.5963	29.5235	29.6091	29.6475	29.8399	log2.LFQ.int	0.0075649	0.0481055	29.8399	29.5235	29.8399
TTHERM_000186039	NA	UV	29.5711	29.441	29.5267	29.3156	29.5299	29.5663	29.5988	log2.LFQ.int	0.00931884	0.0848578	29.5988	29.3156	29.5988
TTHERM_000187168	NA	CPT	25.1783	25.443	25.3181	25.8259	25.4132	25.1153	25.3025	log2.LFQ.int	0.110189	0.187751	25.8259	25.1153	25.8259
TTHERM_000187168	NA	HP	25.797	25.8969	27.2461	26.9185	25.936	27.2322	26.7906	log2.LFQ.int	0.129961	1.15888	27.2461	25.797	27.2461
TTHERM_000187168	NA	HU	25.4486	25.5387	25.4729	26.1112	25.4735	25.5663	25.3731	log2.LFQ.int	0.0750526	0.0918127	26.1112	25.3731	26.1112
TTHERM_000187168	NA	IR	25.5319	25.6136	25.3826	26.0065	25.4991	25.3835	25.4818	log2.LFQ.int	0.114079	0.140036	26.0065	25.3826	26.0065
TTHERM_000187168	NA	MMS	26.0431	25.8233	25.8677	26.3097	25.9952	25.757	25.7093	log2.LFQ.int	0.072239	0.228987	26.3097	25.7093	26.3097
TTHERM_000187168	NA	NT1	25.6744	27.1371	27.0794	26.3073	27.3262	25.8102	25.8572	log2.LFQ.int	0.146492	1.27457	27.3262	25.6744	27.3262
TTHERM_000187168	NA	NT2	25.5002	25.576	25.6723	25.919	25.3814	25.522	25.5823	log2.LFQ.int	0.0317575	0.116211	25.919	25.3814	25.919
TTHERM_000187168	NA	NT3	25.2192	25.3542	25.4111	25.7492	27.8945	25.2628	27.0092	log2.LFQ.int	0.198709	1.0707	27.8945	25.2192	27.8945
TTHERM_000187168	NA	UV	28.0573	27.7445	25.408	25.6549	25.3962	25.44	25.4594	log2.LFQ.int	0.310283	1.27571	28.0573	25.3962	28.0573
TTHERM_000188369	SEC14.TTHERM_000188369	CPT	28.0352	27.9176	27.8893	27.5104	27.4203	27.1332	26.7923	log2.LFQ.int	0.0739149	0.626717	28.0352	26.7923	28.0352
TTHERM_000188369	SEC14.TTHERM_000188369	HP	28.0955	28.2869	27.9865	27.9445	28.1562	27.9901	28.0114	log2.LFQ.int	0.0148906	0.137537	28.2869	27.9445	28.2869
TTHERM_000188369	SEC14.TTHERM_000188369	HU	28.3384	28.3721	28.3976	28.2461	28.1167	28.1222	27.9866	log2.LFQ.int	0.0198797	0.235835	28.3976	27.9866	28.3976
TTHERM_000188369	SEC14.TTHERM_000188369	IR	28.2791	27.9714	28.1229	28.2531	28.2013	28.2439	28.1851	log2.LFQ.int	0.0145916	0.0944779	28.2791	27.9714	28.2791
TTHERM_000188369	SEC14.TTHERM_000188369	MMS	27.9921	28.3373	28.3289	28.4716	28.4501	28.4775	28.448	log2.LFQ.int	0.0195758	0.127757	28.4775	27.9921	28.4775
TTHERM_000188369	SEC14.TTHERM_000188369	NT1	28.2238	28.1261	27.5257	27.7817	27.6466	27.9683	27.6774	log2.LFQ.int	0.0354103	0.385218	28.2238	27.5257	28.2238
TTHERM_000188369	SEC14.TTHERM_000188369	NT2	28.3238	28.3306	28.2435	28.3019	28.2824	28.0345	27.9068	log2.LFQ.int	0.0149717	0.173848	28.3306	27.9068	28.3306
TTHERM_000188369	SEC14.TTHERM_000188369	NT3	28.0543	27.9891	27.9395	28.1042	27.9377	27.8686	27.892	log2.LFQ.int	0.00997461	0.106856	28.1042	27.8686	28.1042
TTHERM_000188369	SEC14.TTHERM_000188369	UV	28.0636	27.8905	27.9498	28.063	28.2778	28.3218	28.2264	log2.LFQ.int	0.0236903	0.245702	28.3218	27.8905	28.3218
TTHERM_000193899	NA	CPT	25.1964	26.1869	26.2294	25.7969	25.4041	26.0798	26.1917	log2.LFQ.int	0.135521	0.588815	26.2294	25.1964	26.2294
TTHERM_000193899	NA	HP	27.0169	26.9206	27.3478	26.9375	27.0457	27.3924	27.0344	log2.LFQ.int	0.030145	0.219588	27.3924	26.9206	27.3924
TTHERM_000193899	NA	HU	27.1539	27.3068	27.2627	26.9062	27.1828	26.8895	26.9362	log2.LFQ.int	0.0312305	0.301551	27.3068	26.8895	27.3068
TTHERM_000193899	NA	IR	27.0914	27.3734	27.3895	27.2397	27.4264	27.2486	27.0512	log2.LFQ.int	0.0296375	0.215885	27.4264	27.0512	27.4264
TTHERM_000193899	NA	MMS	26.9412	26.7631	26.6965	27.4769	25.8915	27.084	26.9726	log2.LFQ.int	0.100097	0.298499	27.4769	25.8915	27.4769
TTHERM_000193899	NA	NT1	26.8847	27.0577	26.5337	26.5016	26.46	26.0534	25.9218	log2.LFQ.int	0.0842437	0.452531	27.0577	25.9218	27.0577
TTHERM_000193899	NA	NT2	27.0075	27.1504	27.0986	27.2491	27.0297	27.1502	26.7442	log2.LFQ.int	0.0193089	0.131768	27.2491	26.7442	27.2491
TTHERM_000193899	NA	NT3	26.4005	26.1754	26.6741	25.9098	25.8612	25.2863	25.4024	log2.LFQ.int	0.109194	0.656116	26.6741	25.2863	26.6741
TTHERM_000193899	NA	UV	24.9787	26.0499	26.9597	26.8174	26.9084	26.6936	26.4983	log2.LFQ.int	0.167654	0.588788	26.9597	24.9787	26.9597
TTHERM_000194439	NA	CPT	27.3207	27.7146	28.0798	28.3408	28.4436	28.4317	28.4307	log2.LFQ.int	0.0558762	0.534014	28.4436	27.3207	28.4436
TTHERM_000194439	NA	HP	27.58	27.816	27.6162	27.5548	27.657	27.5503	27.5598	log2.LFQ.int	0.0120389	0.0793186	27.816	27.5503	27.816
TTHERM_000194439	NA	HU	27.4476	27.5379	27.3776	27.3311	27.4706	27.3834	27.2687	log2.LFQ.int	0.014747	0.104769	27.5379	27.2687	27.5379
TTHERM_000194439	NA	IR	27.6087	27.6247	27.5827	27.5437	27.3431	27.0375	27.3389	log2.LFQ.int	0.0379203	0.254731	27.6247	27.0375	27.6247
TTHERM_000194439	NA	MMS	27.6265	27.7093	27.7069	28.0049	27.899	28.0292	28.2598	log2.LFQ.int	0.0341002	0.308942	28.2598	27.6265	28.2598
TTHERM_000194439	NA	NT1	27.6643	27.3428	27.0864	27.4442	27.1181	27.2152	27.228	log2.LFQ.int	0.0310482	0.226859	27.6643	27.0864	27.6643
TTHERM_000194439	NA	NT2	27.3776	26.8826	27.4908	27.1089	27.5005	27.5158	27.382	log2.LFQ.int	0.0264036	0.252347	27.5158	26.8826	27.5158
TTHERM_000194439	NA	NT3	27.1859	27.2551	27.1294	27.0853	27.0898	27.0152	27.1584	log2.LFQ.int	0.0112398	0.0845801	27.2551	27.0152	27.2551
TTHERM_000194439	NA	UV	27.3227	27.6767	27.7072	27.1929	27.691	27.7315	27.6021	log2.LFQ.int	0.0327003	0.236736	27.7315	27.1929	27.7315
TTHERM_000196029	NA	CPT	29.8356	29.8775	29.8202	29.7834	29.5834	29.6672	29.4498	log2.LFQ.int	0.0147411	0.202575	29.8775	29.4498	29.8775
TTHERM_000196029	NA	HP	29.2613	29.16	29.2686	28.3156	29.177	29.1628	29.0937	log2.LFQ.int	0.0260567	0.0922673	29.2686	28.3156	29.2686
TTHERM_000196029	NA	HU	29.665	29.2858	29.4456	29.4225	29.3776	29.2631	29.2819	log2.LFQ.int	0.0131292	0.150183	29.665	29.2631	29.665
TTHERM_000196029	NA	IR	29.3908	29.3793	29.3174	29.5205	29.2412	29.4498	29.4823	log2.LFQ.int	0.0107715	0.117726	29.5205	29.2412	29.5205
TTHERM_000196029	NA	MMS	29.1283	29.1905	29.1346	29.1051	29.0802	29.0213	28.8709	log2.LFQ.int	0.0109813	0.080688	29.1905	28.8709	29.1905
TTHERM_000196029	NA	NT1	29.3305	29.2921	29.2315	29.0485	29.2327	29.2554	29.1262	log2.LFQ.int	0.00939408	0.0949004	29.3305	29.0485	29.3305
TTHERM_000196029	NA	NT2	29.5203	29.6061	29.7412	29.675	29.6413	29.4774	29.7042	log2.LFQ.int	0.00756867	0.126367	29.7412	29.4774	29.7412
TTHERM_000196029	NA	NT3	29.7452	29.9275	29.9341	29.6628	29.9088	29.9564	29.8623	log2.LFQ.int	0.00855291	0.127073	29.9564	29.6628	29.9564
TTHERM_000196029	NA	UV	29.9386	29.7615	29.3279	29.49	29.1847	29.1968	29.4449	log2.LFQ.int	0.0289757	0.363388	29.9386	29.1847	29.9386
TTHERM_00019660	HPM1.TTHERM_00019660	CPT	25.6749	25.3839	25.5191	25.7216	25.166	25.143	25.1617	log2.LFQ.int	0.120906	0.433147	25.7216	25.143	25.7216
TTHERM_00019660	HPM1.TTHERM_00019660	HP	26.129	25.9545	26.0839	25.9718	25.9837	26.3123	26.2663	log2.LFQ.int	0.0356897	0.219884	26.3123	25.9545	26.3123
TTHERM_00019660	HPM1.TTHERM_00019660	HU	25.5311	25.5512	25.6093	26.0683	25.4513	25.5949	25.5528	log2.LFQ.int	0.0588902	0.0609231	26.0683	25.4513	26.0683
TTHERM_00019660	HPM1.TTHERM_00019660	IR	25.6264	25.465	25.5405	25.9827	25.4363	25.5026	25.6027	log2.LFQ.int	0.0946784	0.130742	25.9827	25.4363	25.9827
TTHERM_00019660	HPM1.TTHERM_00019660	MMS	26.1158	25.9217	25.7956	26.3463	25.7994	26.1874	25.8595	log2.LFQ.int	0.0724554	0.322184	26.3463	25.7956	26.3463
TTHERM_00019660	HPM1.TTHERM_00019660	NT1	25.6495	25.8988	25.9753	26.4417	25.908	25.9486	25.939	log2.LFQ.int	0.0532361	0.0585233	26.4417	25.6495	26.4417
TTHERM_00019660	HPM1.TTHERM_00019660	NT2	25.8632	25.475	25.4825	26.1093	25.4623	25.4491	25.6396	log2.LFQ.int	0.045568	0.282751	26.1093	25.4491	26.1093
TTHERM_00019660	HPM1.TTHERM_00019660	NT3	25.7659	25.832	26.0016	25.7136	25.1137	25.3584	25.3335	log2.LFQ.int	0.0810069	0.452994	26.0016	25.1137	26.0016
TTHERM_00019660	HPM1.TTHERM_00019660	UV	26.1948	25.6762	25.4994	26.1058	25.3422	25.5018	25.2978	log2.LFQ.int	0.151103	0.470208	26.1948	25.2978	26.1948
TTHERM_00019670	NA	CPT	24.9741	25.1505	25.0168	25.8576	25.3533	25.4002	25.3026	log2.LFQ.int	0.155601	0.293068	25.8576	24.9741	25.8576
TTHERM_00019670	NA	HP	25.912	25.8	25.8653	26.4638	26.0099	25.8825	25.9728	log2.LFQ.int	0.0495306	0.117483	26.4638	25.8	26.4638
TTHERM_00019670	NA	HU	25.5193	25.5423	25.4153	25.9976	25.5601	25.4957	25.5124	log2.LFQ.int	0.0565087	0.0471041	25.9976	25.4153	25.9976
TTHERM_00019670	NA	IR	25.4773	25.3829	25.4874	25.9339	25.624	25.3546	25.4951	log2.LFQ.int	0.109831	0.129462	25.9339	25.3546	25.9339
TTHERM_00019670	NA	MMS	25.8539	25.9545	25.6947	26.3427	25.9381	25.8291	25.9922	log2.LFQ.int	0.066624	0.131806	26.3427	25.6947	26.3427
TTHERM_00019670	NA	NT1	25.9596	26.0153	25.8407	26.5702	25.8323	26.1446	26.0698	log2.LFQ.int	0.0579042	0.20705	26.5702	25.8323	26.5702
TTHERM_00019670	NA	NT2	25.52	25.4054	25.5252	25.9927	25.6468	25.5065	25.6287	log2.LFQ.int	0.0337281	0.124493	25.9927	25.4054	25.9927
TTHERM_00019670	NA	NT3	24.0846	25.0834	24.4444	25.726	24.7215	24.7196	23.9482	log2.LFQ.int	0.273163	0.637942	25.726	23.9482	25.726
TTHERM_00019670	NA	UV	25.2368	24.8559	24.6407	25.6736	25.2473	25.5593	25.2947	log2.LFQ.int	0.250716	0.380637	25.6736	24.6407	25.6736
TTHERM_00019680	NA	CPT	29.0683	29.21	29.4298	29.8475	29.9087	29.7971	29.8073	log2.LFQ.int	0.0325282	0.507543	29.9087	29.0683	29.9087
TTHERM_00019680	NA	HP	29.3096	29.3115	29.2395	29.2948	29.2628	29.3475	29.3655	log2.LFQ.int	0.00436744	0.05069	29.3655	29.2395	29.3655
TTHERM_00019680	NA	HU	29.1119	29.1138	29.1095	29.0779	29.1403	29.1527	29.0811	log2.LFQ.int	0.00288477	0.0317589	29.1527	29.0779	29.1527
TTHERM_00019680	NA	IR	29.2562	29.416	29.4486	29.5472	29.4521	29.4271	29.2896	log2.LFQ.int	0.0106879	0.0975719	29.5472	29.2562	29.5472
TTHERM_00019680	NA	MMS	29.4224	29.2141	29.1843	29.1694	29.1582	29.3908	29.4109	log2.LFQ.int	0.0126331	0.223943	29.4224	29.1582	29.4224
TTHERM_00019680	NA	NT1	29.1722	29.2271	29.2585	29.1831	29.2361	29.2229	29.2888	log2.LFQ.int	0.00400716	0.0442919	29.2888	29.1722	29.2888
TTHERM_00019680	NA	NT2	29.206	29.0964	29.1297	29.1879	29.1562	29.1348	29.2119	log2.LFQ.int	0.00365656	0.0646634	29.2119	29.0964	29.2119
TTHERM_00019680	NA	NT3	29.1285	28.9984	29.081	29.1304	29.1345	29.1214	29.0444	log2.LFQ.int	0.00461415	0.0667125	29.1345	28.9984	29.1345
TTHERM_00019680	NA	UV	28.9909	29.2472	29.7742	29.8261	29.7954	29.7513	29.6809	log2.LFQ.int	0.0295278	0.320782	29.8261	28.9909	29.8261
TTHERM_00019700	USO1.TTHERM_00019700	CPT	26.9484	26.8672	26.4372	25.8386	26.7498	26.6516	26.6513	log2.LFQ.int	0.0778548	0.264274	26.9484	25.8386	26.9484
TTHERM_00019700	USO1.TTHERM_00019700	HP	25.8435	25.9757	25.9283	26.2234	25.9343	25.9689	26.1607	log2.LFQ.int	0.0340578	0.136851	26.2234	25.8435	26.2234
TTHERM_00019700	USO1.TTHERM_00019700	HU	25.4646	25.6561	25.4458	26.0363	26.0095	26.4371	26.0392	log2.LFQ.int	0.110145	0.477404	26.4371	25.4458	26.4371
TTHERM_00019700	USO1.TTHERM_00019700	IR	25.6183	25.3458	25.4649	25.865	25.5167	25.3624	25.5479	log2.LFQ.int	0.106256	0.169427	25.865	25.3458	25.865
TTHERM_00019700	USO1.TTHERM_00019700	MMS	26.0274	25.8343	25.8482	26.4313	25.9951	25.9076	25.885	log2.LFQ.int	0.0615332	0.144614	26.4313	25.8343	26.4313
TTHERM_00019700	USO1.TTHERM_00019700	NT1	25.97	26.0898	25.7602	26.4989	26.1681	25.9669	26.0248	log2.LFQ.int	0.0539097	0.160521	26.4989	25.7602	26.4989
TTHERM_00019700	USO1.TTHERM_00019700	NT2	25.4123	25.3527	25.4997	26.0277	25.3523	25.7267	25.6339	log2.LFQ.int	0.0475517	0.297853	26.0277	25.3523	26.0277
TTHERM_00019700	USO1.TTHERM_00019700	NT3	25.3427	25.2385	25.228	25.9921	25.2917	25.2818	25.3694	log2.LFQ.int	0.0575855	0.0959118	25.9921	25.228	25.9921
TTHERM_00019700	USO1.TTHERM_00019700	UV	25.3079	25.3161	25.2845	25.7198	25.4278	25.3355	25.3879	log2.LFQ.int	0.0714058	0.0958166	25.7198	25.2845	25.7198
TTHERM_000202969	NA	CPT	29.862	29.824	29.8971	30.1484	30.0674	30.1641	30.3282	log2.LFQ.int	0.016965	0.276685	30.3282	29.824	30.3282
TTHERM_000202969	NA	HP	30.0536	30.1306	30.0412	29.8474	30.1966	30.0855	30.1456	log2.LFQ.int	0.00901141	0.0906874	30.1966	29.8474	30.1966
TTHERM_000202969	NA	HU	29.8821	30.011	30.0779	30.1401	30.1914	30.2285	30.2715	log2.LFQ.int	0.0118486	0.165533	30.2715	29.8821	30.2715
TTHERM_000202969	NA	IR	30.0666	30.0345	30.0357	30.0305	29.9613	29.9081	30.0685	log2.LFQ.int	0.00535641	0.0552374	30.0685	29.9081	30.0685
TTHERM_000202969	NA	MMS	30.1422	30.2507	30.1421	30.4356	30.5554	30.652	30.677	log2.LFQ.int	0.0202069	0.407276	30.677	30.1421	30.677
TTHERM_000202969	NA	NT1	29.9791	30.0258	29.9965	29.9823	30.0423	30.2902	30.1485	log2.LFQ.int	0.00881603	0.105954	30.2902	29.9791	30.2902
TTHERM_000202969	NA	NT2	29.8984	29.9533	30.0089	30.0365	30.018	30.0968	30.1948	log2.LFQ.int	0.00699143	0.085543	30.1948	29.8984	30.1948
TTHERM_000202969	NA	NT3	29.7702	29.7928	29.772	29.8712	29.9172	29.9675	30.0268	log2.LFQ.int	0.00827919	0.159964	30.0268	29.7702	30.0268
TTHERM_000202969	NA	UV	29.8564	30.2422	30.2183	30.2084	30.2066	30.2068	30.2525	log2.LFQ.int	0.00910351	0.0235114	30.2525	29.8564	30.2525
TTHERM_000215879	NA	CPT	25.5372	25.7518	25.6926	25.7387	25.6968	25.7944	25.8838	log2.LFQ.int	0.0382936	0.0783829	25.8838	25.5372	25.8838
TTHERM_000215879	NA	HP	26.0067	25.8679	25.7118	26.191	26.1156	25.9876	26.1421	log2.LFQ.int	0.0437877	0.201133	26.191	25.7118	26.191
TTHERM_000215879	NA	HU	25.5352	25.6032	25.5927	25.9058	25.3279	25.5521	25.3674	log2.LFQ.int	0.0682237	0.146636	25.9058	25.3279	25.9058
TTHERM_000215879	NA	IR	25.517	25.4606	25.6153	25.8636	25.6993	25.6108	25.521	log2.LFQ.int	0.0749916	0.138344	25.8636	25.4606	25.8636
TTHERM_000215879	NA	MMS	25.8632	25.8602	25.7908	26.4012	25.8592	25.901	25.9918	log2.LFQ.int	0.0596917	0.0866603	26.4012	25.7908	26.4012
TTHERM_000215879	NA	NT1	25.8927	26.0748	25.901	26.2474	25.8444	26.1594	26.0349	log2.LFQ.int	0.0385917	0.220242	26.2474	25.8444	26.2474
TTHERM_000215879	NA	NT2	25.6356	25.5786	25.4912	25.9153	25.5924	25.7106	25.652	log2.LFQ.int	0.0245508	0.0958034	25.9153	25.4912	25.9153
TTHERM_000215879	NA	NT3	25.8931	25.6903	25.2476	25.8295	25.6307	25.4215	25.722	log2.LFQ.int	0.0554072	0.249647	25.8931	25.2476	25.8931
TTHERM_000215879	NA	UV	25.1902	25.5909	25.3947	25.9439	25.7225	25.765	25.7158	log2.LFQ.int	0.111696	0.250924	25.9439	25.1902	25.9439
TTHERM_000218829	LYS9.TTHERM_000218829	CPT	30.7014	30.7309	30.7833	30.7768	30.8336	30.9714	31.1575	log2.LFQ.int	0.0119583	0.148658	31.1575	30.7014	31.1575
TTHERM_000218829	LYS9.TTHERM_000218829	HP	30.4573	30.5191	30.5363	30.1033	30.4337	30.3501	30.4552	log2.LFQ.int	0.0106316	0.0963231	30.5363	30.1033	30.5363
TTHERM_000218829	LYS9.TTHERM_000218829	HU	30.6098	31.1897	31.3483	31.2845	31.2623	31.1766	31.1397	log2.LFQ.int	0.0152284	0.115191	31.3483	30.6098	31.3483
TTHERM_000218829	LYS9.TTHERM_000218829	IR	31.4464	31.6117	31.5646	31.2019	31.1797	31.3926	31.4079	log2.LFQ.int	0.01265	0.208262	31.6117	31.1797	31.6117
TTHERM_000218829	LYS9.TTHERM_000218829	MMS	30.4729	30.5036	30.5534	30.426	30.9345	31.55	31.7837	log2.LFQ.int	0.042478	0.754033	31.7837	30.426	31.7837
TTHERM_000218829	LYS9.TTHERM_000218829	NT1	30.5785	30.1635	30.6701	30.2923	30.8587	31.1051	31.5588	log2.LFQ.int	0.0368289	0.546502	31.5588	30.1635	31.5588
TTHERM_000218829	LYS9.TTHERM_000218829	NT2	30.4813	30.7568	30.6732	30.8172	30.8514	30.8718	30.8568	log2.LFQ.int	0.00859388	0.139109	30.8718	30.4813	30.8718
TTHERM_000218829	LYS9.TTHERM_000218829	NT3	30.8953	30.9009	30.7976	30.9181	30.8037	30.8274	30.7731	log2.LFQ.int	0.00409563	0.097499	30.9181	30.7731	30.9181
TTHERM_000218829	LYS9.TTHERM_000218829	UV	30.871	31.0661	30.9576	30.8085	30.8186	30.9225	30.8401	log2.LFQ.int	0.00719792	0.110684	31.0661	30.8085	31.0661
TTHERM_000220819	NA	CPT	28.0243	28.048	28.4337	28.5115	28.7858	29.0834	29.1105	log2.LFQ.int	0.0548597	0.693716	29.1105	28.0243	29.1105
TTHERM_000220819	NA	HP	27.8732	27.7373	27.7745	27.8807	27.8539	27.9014	27.7206	log2.LFQ.int	0.00999995	0.121082	27.9014	27.7206	27.9014
TTHERM_000220819	NA	HU	27.2264	27.5614	27.8564	27.6489	27.6406	27.9525	27.794	log2.LFQ.int	0.0343903	0.224152	27.9525	27.2264	27.9525
TTHERM_000220819	NA	IR	26.8193	27.5317	27.1936	27.0046	27.5195	27.5495	27.2377	log2.LFQ.int	0.0569204	0.426524	27.5495	26.8193	27.5495
TTHERM_000220819	NA	MMS	27.6858	27.6585	27.7628	27.857	27.7511	27.7276	27.6955	log2.LFQ.int	0.0101344	0.0662712	27.857	27.6585	27.857
TTHERM_000220819	NA	NT1	27.4985	27.2582	27.3324	27.1744	27.7702	27.9135	27.6631	log2.LFQ.int	0.0414162	0.421374	27.9135	27.1744	27.9135
TTHERM_000220819	NA	NT2	27.3803	27.271	27.384	26.7874	27.3633	27.2107	27.5487	log2.LFQ.int	0.0261429	0.141332	27.5487	26.7874	27.5487
TTHERM_000220819	NA	NT3	28.0566	27.902	28.0111	28.0938	28.0717	28.0107	28.0341	log2.LFQ.int	0.00675495	0.0532319	28.0938	27.902	28.0938
TTHERM_000220819	NA	UV	27.9045	27.8879	27.9708	27.7364	27.8301	27.6718	27.8848	log2.LFQ.int	0.0156448	0.112975	27.9708	27.6718	27.9708
TTHERM_00022770	NA	CPT	25.2251	25.3044	25.4089	25.8	25.4652	25.1219	25.2292	log2.LFQ.int	0.107717	0.209927	25.8	25.1219	25.8
TTHERM_00022770	NA	HP	25.9928	25.8349	26.0129	26.1999	25.9574	26.1904	25.9801	log2.LFQ.int	0.0326656	0.132904	26.1999	25.8349	26.1999
TTHERM_00022770	NA	HU	25.4767	25.1724	25.4412	26.0219	25.534	25.4493	25.3908	log2.LFQ.int	0.090329	0.0893452	26.0219	25.1724	26.0219
TTHERM_00022770	NA	IR	25.4912	25.425	25.504	26.0279	25.3465	25.3946	25.4843	log2.LFQ.int	0.115937	0.0877906	26.0279	25.3465	26.0279
TTHERM_00022770	NA	MMS	25.6638	25.9642	25.8884	26.3053	25.9437	25.984	25.9247	log2.LFQ.int	0.0601653	0.0675494	26.3053	25.6638	26.3053
TTHERM_00022770	NA	NT1	26.0463	26.044	25.8101	26.5168	25.9018	25.9445	25.8722	log2.LFQ.int	0.0526358	0.158159	26.5168	25.8101	26.5168
TTHERM_00022770	NA	NT2	25.5303	25.3521	25.494	25.935	25.3975	25.296	25.2899	log2.LFQ.int	0.0420656	0.188098	25.935	25.2899	25.935
TTHERM_00022770	NA	NT3	25.268	25.2273	25.3207	25.7873	25.2632	25.4001	25.2088	log2.LFQ.int	0.0480931	0.115155	25.7873	25.2088	25.7873
TTHERM_00022770	NA	UV	25.1499	25.2674	25.392	25.7428	25.3559	25.5573	25.549	log2.LFQ.int	0.10871	0.241486	25.7428	25.1499	25.7428
TTHERM_00022810	ICL1.TTHERM_00022810	CPT	34.0157	33.9203	33.9998	33.9965	34.0258	34.1884	34.2379	log2.LFQ.int	0.00572719	0.108968	34.2379	33.9203	34.2379
TTHERM_00022810	ICL1.TTHERM_00022810	HP	34.2506	34.1607	34.267	34.0451	34.1541	34.1949	34.243	log2.LFQ.int	0.00378217	0.0893814	34.267	34.0451	34.267
TTHERM_00022810	ICL1.TTHERM_00022810	HU	34.1434	34.09	33.9782	34.0571	34.0259	33.999	33.972	log2.LFQ.int	0.00330149	0.0849304	34.1434	33.972	34.1434
TTHERM_00022810	ICL1.TTHERM_00022810	IR	34.1246	34.0434	33.9817	34.124	34.2299	34.1428	34.0938	log2.LFQ.int	0.00422952	0.0650705	34.2299	33.9817	34.2299
TTHERM_00022810	ICL1.TTHERM_00022810	MMS	34.22	34.2717	34.0839	34.152	34.0655	33.9275	33.7335	log2.LFQ.int	0.00974673	0.189522	34.2717	33.7335	34.2717
TTHERM_00022810	ICL1.TTHERM_00022810	NT1	34.3557	34.2393	34.2459	34.1923	34.1168	33.9893	33.8513	log2.LFQ.int	0.00864511	0.189578	34.3557	33.8513	34.3557
TTHERM_00022810	ICL1.TTHERM_00022810	NT2	34.1617	34.1766	34.1922	34.214	34.2016	34.1189	34.0792	log2.LFQ.int	0.00219464	0.0566193	34.214	34.0792	34.214
TTHERM_00022810	ICL1.TTHERM_00022810	NT3	33.9012	33.9805	33.9363	33.9307	33.9623	33.9877	33.9133	log2.LFQ.int	0.00166954	0.0494001	33.9877	33.9012	33.9877
TTHERM_00022810	ICL1.TTHERM_00022810	UV	33.9796	33.7922	33.6935	33.7687	33.8089	33.8367	33.7886	log2.LFQ.int	0.00443442	0.0441355	33.9796	33.6935	33.9796
TTHERM_00023920	RRM65	CPT	28.3587	28.2974	28.6046	28.8339	28.7872	28.7997	29.0761	log2.LFQ.int	0.0327745	0.33514	29.0761	28.2974	29.0761
TTHERM_00023920	RRM65	HP	27.3342	27.9952	27.4705	28.1298	27.7521	27.9073	27.8597	log2.LFQ.int	0.0391339	0.339902	28.1298	27.3342	28.1298
TTHERM_00023920	RRM65	HU	28.4681	28.3803	28.3806	28.3989	28.3564	28.2209	28.411	log2.LFQ.int	0.00850372	0.0365987	28.4681	28.2209	28.4681
TTHERM_00023920	RRM65	IR	28.5126	28.705	28.5928	28.4917	28.5789	28.5416	28.2294	log2.LFQ.int	0.018129	0.0836901	28.705	28.2294	28.705
TTHERM_00023920	RRM65	MMS	27.4803	28.1261	28.1212	28.2249	28.0601	28.2915	28.1419	log2.LFQ.int	0.0318074	0.0927643	28.2915	27.4803	28.2915
TTHERM_00023920	RRM65	NT1	28.0961	27.8405	27.8876	27.8732	27.8075	27.4093	27.8021	log2.LFQ.int	0.024533	0.0755598	28.0961	27.4093	28.0961
TTHERM_00023920	RRM65	NT2	28.2424	28.3297	28.2953	28.3069	28.2246	28.276	28.1811	log2.LFQ.int	0.00514355	0.0676324	28.3297	28.1811	28.3297
TTHERM_00023920	RRM65	NT3	28.1987	28.1964	28.322	28.3063	28.2053	28.1713	28.1773	log2.LFQ.int	0.00626253	0.0689617	28.322	28.1713	28.322
TTHERM_00023920	RRM65	UV	28.4169	28.6369	28.6041	28.4968	28.4993	28.2478	28.4372	log2.LFQ.int	0.0163458	0.124631	28.6369	28.2478	28.6369
TTHERM_00023950	DYN2.TTHERM_00023950	CPT	29.3423	29.3461	29.1847	29.0364	29.0524	28.9726	28.9705	log2.LFQ.int	0.0171812	0.259002	29.3461	28.9705	29.3461
TTHERM_00023950	DYN2.TTHERM_00023950	HP	29.482	29.4946	29.4537	29.3321	29.2857	29.0818	29.1614	log2.LFQ.int	0.0157863	0.244296	29.4946	29.0818	29.4946
TTHERM_00023950	DYN2.TTHERM_00023950	HU	29.4137	29.569	29.2595	29.5282	29.4871	29.4776	29.5566	log2.LFQ.int	0.00979705	0.0967097	29.569	29.2595	29.569
TTHERM_00023950	DYN2.TTHERM_00023950	IR	29.3348	29.393	29.3803	29.403	29.3843	29.4806	29.4019	log2.LFQ.int	0.00435458	0.0201667	29.4806	29.3348	29.4806
TTHERM_00023950	DYN2.TTHERM_00023950	MMS	29.325	29.3198	29.2953	29.3067	29.1282	29.1166	28.922	log2.LFQ.int	0.015543	0.190857	29.325	28.922	29.325
TTHERM_00023950	DYN2.TTHERM_00023950	NT1	29.3342	29.4828	29.3583	29.4238	29.3014	29.2461	29.1312	log2.LFQ.int	0.0112348	0.117277	29.4828	29.1312	29.4828
TTHERM_00023950	DYN2.TTHERM_00023950	NT2	29.4622	29.5561	29.5902	29.6057	29.5226	29.5346	29.6092	log2.LFQ.int	0.00412805	0.0693262	29.6092	29.4622	29.6092
TTHERM_00023950	DYN2.TTHERM_00023950	NT3	29.4936	29.604	29.5043	29.5709	29.6438	29.5932	29.5705	log2.LFQ.int	0.00455315	0.0611653	29.6438	29.4936	29.6438
TTHERM_00023950	DYN2.TTHERM_00023950	UV	29.6968	29.3811	29.1881	29.163	29.2977	29.2888	29.4615	log2.LFQ.int	0.0187371	0.182892	29.6968	29.163	29.6968
TTHERM_00023980	RAN1	CPT	34.4446	34.6703	34.7304	34.854	34.9139	34.9858	35.0661	log2.LFQ.int	0.0104485	0.249531	35.0661	34.4446	35.0661
TTHERM_00023980	RAN1	HP	34.3709	34.3917	34.467	34.3382	34.6595	34.639	34.7471	log2.LFQ.int	0.00798625	0.267954	34.7471	34.3382	34.7471
TTHERM_00023980	RAN1	HU	34.6189	34.5409	34.4343	34.4567	34.3388	34.3139	34.2875	log2.LFQ.int	0.00625121	0.172478	34.6189	34.2875	34.6189
TTHERM_00023980	RAN1	IR	34.5664	34.9253	34.9496	34.9026	34.8689	34.5733	34.4385	log2.LFQ.int	0.0104887	0.344129	34.9496	34.4385	34.9496
TTHERM_00023980	RAN1	MMS	34.3441	34.2293	34.156	34.2584	34.1166	34.2314	34.2911	log2.LFQ.int	0.00411409	0.0821027	34.3441	34.1166	34.3441
TTHERM_00023980	RAN1	NT1	34.2501	34.4182	34.3202	34.3342	34.3042	34.1622	34.0794	log2.LFQ.int	0.00568444	0.121015	34.4182	34.0794	34.4182
TTHERM_00023980	RAN1	NT2	34.6494	34.6653	34.5543	34.6153	34.56	34.4231	34.3656	log2.LFQ.int	0.00499347	0.143657	34.6653	34.3656	34.6653
TTHERM_00023980	RAN1	NT3	34.3881	34.3755	34.4428	34.4219	34.2966	34.2617	34.184	log2.LFQ.int	0.00449083	0.125861	34.4428	34.184	34.4428
TTHERM_00023980	RAN1	UV	34.3708	34.5885	34.6332	34.6702	34.6938	34.6044	34.5463	log2.LFQ.int	0.00508975	0.0842661	34.6938	34.3708	34.6938
TTHERM_00023990	RRM63	CPT	26.8298	27.5012	27.5928	27.3305	27.9687	27.9678	28.1138	log2.LFQ.int	0.0698224	0.55246	28.1138	26.8298	28.1138
TTHERM_00023990	RRM63	HP	26.1561	26.7932	25.7252	26.2601	26.1077	25.8509	25.9941	log2.LFQ.int	0.0815634	0.285617	26.7932	25.7252	26.7932
TTHERM_00023990	RRM63	HU	25.5912	25.4173	25.461	25.9965	25.313	25.3645	25.359	log2.LFQ.int	0.0820378	0.164394	25.9965	25.313	25.9965
TTHERM_00023990	RRM63	IR	26.6249	27.5043	25.4557	27.4819	27.2678	25.4193	25.458	log2.LFQ.int	0.281967	1.918	27.5043	25.4193	27.5043
TTHERM_00023990	RRM63	MMS	25.9072	26.0589	25.8928	26.1697	25.9805	25.8838	26.869	log2.LFQ.int	0.0923827	0.214328	26.869	25.8838	26.869
TTHERM_00023990	RRM63	NT1	25.8067	25.9419	25.9887	26.3859	26.0087	25.8291	26.0076	log2.LFQ.int	0.0441313	0.122678	26.3859	25.8067	26.3859
TTHERM_00023990	RRM63	NT2	25.4081	25.6136	26.5374	26.1043	26.6494	25.5518	26.6135	log2.LFQ.int	0.0900853	0.992696	26.6494	25.4081	26.6494
TTHERM_00023990	RRM63	NT3	25.0393	25.2314	25.4254	25.7443	26.1088	25.2774	25.3062	log2.LFQ.int	0.0936957	0.330439	26.1088	25.0393	26.1088
TTHERM_00023990	RRM63	UV	25.2409	26.4486	25.2562	25.829	25.3157	25.5191	25.3704	log2.LFQ.int	0.185176	0.388141	26.4486	25.2409	26.4486
TTHERM_00024050	ELP1	CPT	30.7816	30.794	30.8897	31.0353	31.0302	31.0088	30.981	log2.LFQ.int	0.00837987	0.177665	31.0353	30.7816	31.0353
TTHERM_00024050	ELP1	HP	30.7253	30.756	30.7476	30.8876	30.7155	30.9282	30.92	log2.LFQ.int	0.00702982	0.167334	30.9282	30.7155	30.9282
TTHERM_00024050	ELP1	HU	31.0419	30.9928	30.959	30.9408	30.7541	30.7472	30.7181	log2.LFQ.int	0.0101928	0.225258	31.0419	30.7181	31.0419
TTHERM_00024050	ELP1	IR	31.1405	31.2787	31.3689	31.4021	31.1922	31.112	30.8899	log2.LFQ.int	0.0137575	0.197554	31.4021	30.8899	31.4021
TTHERM_00024050	ELP1	MMS	30.6673	30.7505	30.829	30.9053	30.7714	30.949	31.0237	log2.LFQ.int	0.0102849	0.16622	31.0237	30.6673	31.0237
TTHERM_00024050	ELP1	NT1	30.5896	30.5084	30.5819	30.4026	30.6255	30.5273	30.477	log2.LFQ.int	0.00604124	0.0930263	30.6255	30.4026	30.6255
TTHERM_00024050	ELP1	NT2	30.952	30.9258	30.9184	30.9248	30.8328	30.8392	30.778	log2.LFQ.int	0.00411031	0.0893262	30.952	30.778	30.952
TTHERM_00024050	ELP1	NT3	30.8673	30.808	30.8333	30.8618	30.7434	30.6032	30.5762	log2.LFQ.int	0.00837136	0.174216	30.8673	30.5762	30.8673
TTHERM_00024050	ELP1	UV	30.8652	31.0513	31.1308	31.2014	31.1642	31.1674	31.1292	log2.LFQ.int	0.0078567	0.0755558	31.2014	30.8652	31.2014
TTHERM_00024130	IFA38.TTHERM_00024130	CPT	26.9692	26.7431	26.7461	26.7525	26.5416	26.2231	25.8667	log2.LFQ.int	0.0846137	0.366905	26.9692	25.8667	26.9692
TTHERM_00024130	IFA38.TTHERM_00024130	HP	25.8981	25.9649	25.5345	26.4199	26.0009	25.9561	26.063	log2.LFQ.int	0.0636324	0.104827	26.4199	25.5345	26.4199
TTHERM_00024130	IFA38.TTHERM_00024130	HU	27.0122	27.148	27.2869	27.2643	27.0371	27.0521	27.1435	log2.LFQ.int	0.0191228	0.161583	27.2869	27.0122	27.2869
TTHERM_00024130	IFA38.TTHERM_00024130	IR	26.7374	26.5703	26.5198	26.0409	26.7271	26.274	26.4561	log2.LFQ.int	0.071697	0.283624	26.7374	26.0409	26.7374
TTHERM_00024130	IFA38.TTHERM_00024130	MMS	25.8038	25.7862	25.9224	26.2459	25.8137	25.9171	25.9989	log2.LFQ.int	0.0534006	0.151928	26.2459	25.7862	26.2459
TTHERM_00024130	IFA38.TTHERM_00024130	NT1	25.7453	26.1337	26.0069	26.1997	25.9868	25.9073	25.9601	log2.LFQ.int	0.038095	0.136607	26.1997	25.7453	26.1997
TTHERM_00024130	IFA38.TTHERM_00024130	NT2	27.1863	27.1936	27.0849	26.9435	27.0389	26.9962	26.9135	log2.LFQ.int	0.0142545	0.165731	27.1936	26.9135	27.1936
TTHERM_00024130	IFA38.TTHERM_00024130	NT3	26.9939	26.9842	26.9262	26.7247	26.8216	26.809	26.5535	log2.LFQ.int	0.0242694	0.188382	26.9939	26.5535	26.9939
TTHERM_00024130	IFA38.TTHERM_00024130	UV	26.934	26.7697	26.8648	26.4991	26.7445	26.799	26.705	log2.LFQ.int	0.0299678	0.107205	26.934	26.4991	26.934
TTHERM_00024170	IFA38.TTHERM_00024170	CPT	28.1504	28.0551	27.9259	27.9057	27.9169	27.677	27.4858	log2.LFQ.int	0.0320314	0.199159	28.1504	27.4858	28.1504
TTHERM_00024170	IFA38.TTHERM_00024170	HP	28.4295	28.5508	28.4567	27.7728	28.3823	28.4412	28.3204	log2.LFQ.int	0.0252831	0.0976356	28.5508	27.7728	28.5508
TTHERM_00024170	IFA38.TTHERM_00024170	HU	28.134	28.3944	28.3664	28.429	28.518	28.4393	28.6109	log2.LFQ.int	0.0172357	0.0982383	28.6109	28.134	28.6109
TTHERM_00024170	IFA38.TTHERM_00024170	IR	27.9481	27.9252	28.0692	27.9095	28.1262	28.0494	28.3339	log2.LFQ.int	0.0219082	0.161032	28.3339	27.9095	28.3339
TTHERM_00024170	IFA38.TTHERM_00024170	MMS	28.4723	28.3788	28.3347	28.5252	28.6517	28.6194	27.9978	log2.LFQ.int	0.027775	0.215551	28.6517	27.9978	28.6517
TTHERM_00024170	IFA38.TTHERM_00024170	NT1	28.3832	28.2806	28.355	28.3107	28.4353	28.6079	28.5278	log2.LFQ.int	0.0138207	0.148689	28.6079	28.2806	28.6079
TTHERM_00024170	IFA38.TTHERM_00024170	NT2	28.0596	28.3034	28.1922	28.3788	28.0988	28.3138	28.383	log2.LFQ.int	0.012851	0.200813	28.383	28.0596	28.383
TTHERM_00024170	IFA38.TTHERM_00024170	NT3	28.1411	28.0147	28.18	28.3839	28.209	28.1924	28.2612	log2.LFQ.int	0.0120606	0.074509	28.3839	28.0147	28.3839
TTHERM_00024170	IFA38.TTHERM_00024170	UV	28.084	28.1339	28.2076	28.2251	28.3835	28.506	28.4138	log2.LFQ.int	0.021463	0.227869	28.506	28.084	28.506
TTHERM_00024180	IFA38.TTHERM_00024180	CPT	28.8076	28.5919	28.5531	28.644	28.4608	28.1379	28.0161	log2.LFQ.int	0.0348965	0.318575	28.8076	28.0161	28.8076
TTHERM_00024180	IFA38.TTHERM_00024180	HP	29.0615	28.9212	28.872	28.7603	28.9124	28.9768	28.8477	log2.LFQ.int	0.0101391	0.0891538	29.0615	28.7603	29.0615
TTHERM_00024180	IFA38.TTHERM_00024180	HU	29.2023	29.3037	29.2744	29.2893	29.2015	29.1176	29.3952	log2.LFQ.int	0.00908178	0.0946494	29.3952	29.1176	29.3952
TTHERM_00024180	IFA38.TTHERM_00024180	IR	28.2004	28.9184	29.1024	29.379	29.3376	29.4608	29.4498	log2.LFQ.int	0.0473238	0.403995	29.4608	28.2004	29.4608
TTHERM_00024180	IFA38.TTHERM_00024180	MMS	28.8315	28.779	28.6904	28.7292	28.6441	28.6166	28.4161	log2.LFQ.int	0.0161657	0.123722	28.8315	28.4161	28.8315
TTHERM_00024180	IFA38.TTHERM_00024180	NT1	28.6153	28.849	28.9855	28.942	29.0328	29.1011	28.9087	log2.LFQ.int	0.0157642	0.130232	29.1011	28.6153	29.1011
TTHERM_00024180	IFA38.TTHERM_00024180	NT2	29.0735	29.2717	29.4018	29.5334	29.2688	29.5001	29.4719	log2.LFQ.int	0.0131079	0.215742	29.5334	29.0735	29.5334
TTHERM_00024180	IFA38.TTHERM_00024180	NT3	28.7938	28.875	28.7861	29.1219	28.9766	28.8872	28.9945	log2.LFQ.int	0.0114584	0.151207	29.1219	28.7861	29.1219
TTHERM_00024180	IFA38.TTHERM_00024180	UV	28.6734	28.6979	28.6697	28.8497	28.9545	29.0591	29.0943	log2.LFQ.int	0.0214297	0.32115	29.0943	28.6697	29.0943
TTHERM_00024190	IFA38.TTHERM_00024190	CPT	28.4351	28.449	28.3526	27.1896	28.3234	28.0285	27.873	log2.LFQ.int	0.0569044	0.443098	28.449	27.1896	28.449
TTHERM_00024190	IFA38.TTHERM_00024190	HP	28.8998	29.1828	29.0105	28.7656	29.119	29.0645	28.8794	log2.LFQ.int	0.0156109	0.202143	29.1828	28.7656	29.1828
TTHERM_00024190	IFA38.TTHERM_00024190	HU	28.4558	28.7997	29.1107	29.2286	29.4568	29.4768	29.8169	log2.LFQ.int	0.047295	0.511546	29.8169	28.4558	29.8169
TTHERM_00024190	IFA38.TTHERM_00024190	IR	27.9522	27.7134	27.9709	27.8367	28.1125	28.3014	28.6805	log2.LFQ.int	0.0482452	0.312519	28.6805	27.7134	28.6805
TTHERM_00024190	IFA38.TTHERM_00024190	MMS	29.2512	29.1718	29.1088	29.5792	29.3835	29.6875	29.6665	log2.LFQ.int	0.0253541	0.411359	29.6875	29.1088	29.6875
TTHERM_00024190	IFA38.TTHERM_00024190	NT1	28.5331	28.9012	28.8368	29.0655	28.9799	29.1877	29.114	log2.LFQ.int	0.0221171	0.220777	29.1877	28.5331	29.1877
TTHERM_00024190	IFA38.TTHERM_00024190	NT2	28.529	28.5796	28.5512	28.6883	28.8957	28.9965	29.1909	log2.LFQ.int	0.022562	0.380665	29.1909	28.529	29.1909
TTHERM_00024190	IFA38.TTHERM_00024190	NT3	28.6335	28.5291	28.3725	28.7028	28.7202	28.8951	29.0141	log2.LFQ.int	0.0217127	0.226339	29.0141	28.3725	29.0141
TTHERM_00024190	IFA38.TTHERM_00024190	UV	28.403	28.4663	28.6534	28.0349	28.8025	29.1957	29.2508	log2.LFQ.int	0.053944	0.564416	29.2508	28.0349	29.2508
TTHERM_000242129	MAK3.TTHERM_000242129	CPT	28.3319	28.1376	28.205	28.1359	28.1729	28.1615	28.1468	log2.LFQ.int	0.00796007	0.0467264	28.3319	28.1359	28.3319
TTHERM_000242129	MAK3.TTHERM_000242129	HP	28.6054	28.4909	28.6687	28.0203	28.4945	28.4517	28.6193	log2.LFQ.int	0.0219845	0.14106	28.6687	28.0203	28.6687
TTHERM_000242129	MAK3.TTHERM_000242129	HU	28.6367	28.4129	28.3146	27.8275	28.4296	28.2283	28.3679	log2.LFQ.int	0.0290423	0.149764	28.6367	27.8275	28.6367
TTHERM_000242129	MAK3.TTHERM_000242129	IR	28.4842	28.5231	28.4354	28.6404	28.529	28.5089	28.5172	log2.LFQ.int	0.00768908	0.0294499	28.6404	28.4354	28.6404
TTHERM_000242129	MAK3.TTHERM_000242129	MMS	28.366	28.5684	28.4383	28.5614	28.5314	28.4787	28.4506	log2.LFQ.int	0.00954732	0.101902	28.5684	28.366	28.5684
TTHERM_000242129	MAK3.TTHERM_000242129	NT1	28.6353	28.4608	28.5189	27.9714	28.4314	28.284	28.0472	log2.LFQ.int	0.0292652	0.324301	28.6353	27.9714	28.6353
TTHERM_000242129	MAK3.TTHERM_000242129	NT2	28.5438	28.3989	28.3282	28.5781	28.4609	28.3975	28.4727	log2.LFQ.int	0.00835141	0.110012	28.5781	28.3282	28.5781
TTHERM_000242129	MAK3.TTHERM_000242129	NT3	28.4345	28.3839	28.3054	28.3499	28.3824	28.325	28.272	log2.LFQ.int	0.00595635	0.0679672	28.4345	28.272	28.4345
TTHERM_000242129	MAK3.TTHERM_000242129	UV	28.3044	28.4033	28.1945	28.2424	28.3819	28.3762	28.4008	log2.LFQ.int	0.0108031	0.117981	28.4033	28.1945	28.4033
TTHERM_00024220	NA	CPT	29.6333	29.6791	29.5435	29.6129	29.7296	29.7293	30.0987	log2.LFQ.int	0.0151523	0.10638	30.0987	29.5435	30.0987
TTHERM_00024220	NA	HP	29.8855	29.7126	29.8375	29.8572	29.7736	29.8824	29.9399	log2.LFQ.int	0.00668031	0.0784537	29.9399	29.7126	29.9399
TTHERM_00024220	NA	HU	29.4813	29.7382	29.6591	29.6742	29.7524	29.9341	29.818	log2.LFQ.int	0.0129684	0.118553	29.9341	29.4813	29.9341
TTHERM_00024220	NA	IR	29.5656	29.4976	29.2996	29.4271	29.5638	29.6241	29.8444	log2.LFQ.int	0.0176719	0.132481	29.8444	29.2996	29.8444
TTHERM_00024220	NA	MMS	29.9359	29.936	29.8689	29.9691	29.755	29.7654	29.8346	log2.LFQ.int	0.00823887	0.135962	29.9691	29.755	29.9691
TTHERM_00024220	NA	NT1	29.9741	29.934	30.09	30.2667	30.0641	30.2789	30.1935	log2.LFQ.int	0.0116675	0.211005	30.2789	29.934	30.2789
TTHERM_00024220	NA	NT2	29.7167	29.6381	29.7217	29.7533	29.7421	29.8749	29.9772	log2.LFQ.int	0.00822646	0.0949077	29.9772	29.6381	29.9772
TTHERM_00024220	NA	NT3	29.7438	29.7088	29.7484	29.836	29.834	29.883	29.875	log2.LFQ.int	0.0056828	0.109366	29.883	29.7088	29.883
TTHERM_00024220	NA	UV	29.6772	29.5349	29.5695	29.458	29.5189	29.5771	29.6703	log2.LFQ.int	0.00802371	0.0967715	29.6772	29.458	29.6772
TTHERM_00024240	HCH1.TTHERM_00024240	CPT	29.938	29.8697	29.8806	30.0934	30.021	29.8684	29.7005	log2.LFQ.int	0.0113813	0.110462	30.0934	29.7005	30.0934
TTHERM_00024240	HCH1.TTHERM_00024240	HP	29.5594	29.3689	29.4843	29.3644	29.4081	29.3193	29.5795	log2.LFQ.int	0.00970653	0.155222	29.5795	29.3193	29.5795
TTHERM_00024240	HCH1.TTHERM_00024240	HU	30.1371	29.8841	29.8014	29.816	29.678	29.7554	29.4827	log2.LFQ.int	0.0177794	0.133338	30.1371	29.4827	30.1371
TTHERM_00024240	HCH1.TTHERM_00024240	IR	30.0645	30.0166	29.889	30.0717	30.0754	30.0543	29.9907	log2.LFQ.int	0.00590397	0.0644385	30.0754	29.889	30.0754
TTHERM_00024240	HCH1.TTHERM_00024240	MMS	29.4758	29.5471	29.4338	29.5023	29.5354	29.5434	29.6487	log2.LFQ.int	0.00671452	0.0562498	29.6487	29.4338	29.6487
TTHERM_00024240	HCH1.TTHERM_00024240	NT1	29.7653	29.5688	29.5175	29.5175	29.5211	29.377	29.2603	log2.LFQ.int	0.0140967	0.0977133	29.7653	29.2603	29.7653
TTHERM_00024240	HCH1.TTHERM_00024240	NT2	30.1086	29.9426	29.9407	30.08	30.0111	29.8481	29.8873	log2.LFQ.int	0.00724015	0.131497	30.1086	29.8481	30.1086
TTHERM_00024240	HCH1.TTHERM_00024240	NT3	29.8419	29.8848	29.9085	29.7931	29.8616	29.8314	29.6844	log2.LFQ.int	0.00574672	0.0609357	29.9085	29.6844	29.9085
TTHERM_00024240	HCH1.TTHERM_00024240	UV	30.0904	29.9476	29.9618	29.843	29.7326	29.5873	29.5396	log2.LFQ.int	0.0199894	0.294764	30.0904	29.5396	30.0904
TTHERM_00024250	NA	CPT	25.6366	25.7802	26.1224	25.9171	25.3812	25.5546	25.6832	log2.LFQ.int	0.0913946	0.253103	26.1224	25.3812	26.1224
TTHERM_00024250	NA	HP	25.9964	25.703	25.7152	26.197	25.9638	26.0567	26.0208	log2.LFQ.int	0.047292	0.199251	26.197	25.703	26.197
TTHERM_00024250	NA	HU	26.0184	25.9724	25.8982	26.0293	25.7799	26.1291	26.1087	log2.LFQ.int	0.0347892	0.133764	26.1291	25.7799	26.1291
TTHERM_00024250	NA	IR	25.3941	25.5542	25.5591	26.104	25.5375	25.4324	25.4652	log2.LFQ.int	0.115547	0.107888	26.104	25.3941	26.104
TTHERM_00024250	NA	MMS	26.0496	25.6622	25.852	26.593	25.7864	25.9709	26.0416	log2.LFQ.int	0.0953107	0.226402	26.593	25.6622	26.593
TTHERM_00024250	NA	NT1	25.6964	25.9949	25.9858	26.3893	25.8608	25.9398	26.0174	log2.LFQ.int	0.0502366	0.105844	26.3893	25.6964	26.3893
TTHERM_00024250	NA	NT2	25.9134	25.4356	25.949	26.0561	25.7707	26.0799	26.3622	log2.LFQ.int	0.0491985	0.22597	26.3622	25.4356	26.3622
TTHERM_00024250	NA	NT3	25.6401	25.8512	25.7239	25.6296	25.7756	25.8682	26.0488	log2.LFQ.int	0.033364	0.177712	26.0488	25.6296	26.0488
TTHERM_00024250	NA	UV	25.7215	25.2966	25.4879	25.7971	25.4184	25.2785	25.3044	log2.LFQ.int	0.105747	0.304226	25.7971	25.2785	25.7971
TTHERM_00024260	OYE2.TTHERM_00024260	CPT	30.4414	30.3239	30.1826	30.175	29.9681	29.7842	29.5258	log2.LFQ.int	0.0288678	0.377089	30.4414	29.5258	30.4414
TTHERM_00024260	OYE2.TTHERM_00024260	HP	30.4458	30.4963	30.5256	30.4693	30.2901	30.1276	30.1865	log2.LFQ.int	0.0128493	0.244487	30.5256	30.1276	30.5256
TTHERM_00024260	OYE2.TTHERM_00024260	HU	30.4326	30.8478	30.849	30.7911	30.8689	30.8865	30.7884	log2.LFQ.int	0.00980567	0.0692401	30.8865	30.4326	30.8865
TTHERM_00024260	OYE2.TTHERM_00024260	IR	30.4793	30.4157	30.1968	30.2461	30.0983	30.2333	30.323	log2.LFQ.int	0.0122201	0.154332	30.4793	30.0983	30.4793
TTHERM_00024260	OYE2.TTHERM_00024260	MMS	30.3542	30.8403	30.9013	30.9222	30.8564	30.7661	30.5927	log2.LFQ.int	0.0157323	0.199411	30.9222	30.3542	30.9222
TTHERM_00024260	OYE2.TTHERM_00024260	NT1	30.5417	30.4685	30.4529	30.3469	30.5111	30.3947	30.398	log2.LFQ.int	0.00561952	0.0934822	30.5417	30.3469	30.5417
TTHERM_00024260	OYE2.TTHERM_00024260	NT2	30.4654	30.3692	30.3873	30.4892	30.4749	30.4735	30.5329	log2.LFQ.int	0.00385684	0.0556978	30.5329	30.3692	30.5329
TTHERM_00024260	OYE2.TTHERM_00024260	NT3	30.3859	30.3971	30.3037	30.3539	30.3701	30.3286	30.4021	log2.LFQ.int	0.00277532	0.0502326	30.4021	30.3037	30.4021
TTHERM_00024260	OYE2.TTHERM_00024260	UV	30.3625	30.3162	30.2992	30.0918	29.9391	29.8876	29.9247	log2.LFQ.int	0.0185667	0.375834	30.3625	29.8876	30.3625
TTHERM_00024320	NA	CPT	26.9221	26.9573	26.8453	26.6852	26.9004	26.5309	26.5908	log2.LFQ.int	0.0362028	0.273273	26.9573	26.5309	26.9573
TTHERM_00024320	NA	HP	25.7961	25.7035	25.6766	26.1881	25.8177	25.8832	25.98	log2.LFQ.int	0.0484817	0.181772	26.1881	25.6766	26.1881
TTHERM_00024320	NA	HU	25.5113	25.5541	25.4036	26.3891	26.1843	25.5411	25.3634	log2.LFQ.int	0.126905	0.411736	26.3891	25.3634	26.3891
TTHERM_00024320	NA	IR	25.5925	25.5957	25.4455	25.9815	25.6583	25.5628	25.4715	log2.LFQ.int	0.0903085	0.109852	25.9815	25.4455	25.9815
TTHERM_00024320	NA	MMS	25.8846	25.9631	25.8054	26.279	26.0226	26.0157	25.8594	log2.LFQ.int	0.0516448	0.147109	26.279	25.8054	26.279
TTHERM_00024320	NA	NT1	26.0784	25.7659	25.904	26.5366	26.0284	25.9186	26.1722	log2.LFQ.int	0.0595306	0.214004	26.5366	25.7659	26.5366
TTHERM_00024320	NA	NT2	25.4629	26.2059	25.5085	25.7859	26.1774	25.3941	26.0563	log2.LFQ.int	0.0643548	0.631099	26.2059	25.3941	26.2059
TTHERM_00024320	NA	NT3	26.9484	26.7947	26.9456	26.6073	26.7813	26.8377	26.8375	log2.LFQ.int	0.0173394	0.103596	26.9484	26.6073	26.9484
TTHERM_00024320	NA	UV	27.0821	26.8553	26.2283	26.3568	26.3668	26.1344	25.2752	log2.LFQ.int	0.153972	0.429687	27.0821	25.2752	27.0821
TTHERM_00024330	LSM4.TTHERM_00024330	CPT	26.478	26.7983	26.6003	26.8535	26.8356	26.9651	27.0984	log2.LFQ.int	0.0439003	0.209976	27.0984	26.478	27.0984
TTHERM_00024330	LSM4.TTHERM_00024330	HP	25.8064	26.4459	26.4418	26.4371	26.4663	26.6192	26.5983	log2.LFQ.int	0.0479831	0.0928469	26.6192	25.8064	26.6192
TTHERM_00024330	LSM4.TTHERM_00024330	HU	26.8655	26.4336	26.8088	25.9251	26.7393	26.6638	26.6849	log2.LFQ.int	0.062346	0.22536	26.8655	25.9251	26.8655
TTHERM_00024330	LSM4.TTHERM_00024330	IR	26.9801	26.5698	26.6025	26.6217	26.5293	26.7318	26.7033	log2.LFQ.int	0.0367814	0.131361	26.9801	26.5293	26.9801
TTHERM_00024330	LSM4.TTHERM_00024330	MMS	26.7376	25.8925	26.1805	26.2189	27.0377	27.1113	26.7362	log2.LFQ.int	0.116247	0.687958	27.1113	25.8925	27.1113
TTHERM_00024330	LSM4.TTHERM_00024330	NT1	26.6294	26.2846	26.2623	26.5129	26.2075	26.2098	25.8983	log2.LFQ.int	0.0512839	0.190082	26.6294	25.8983	26.6294
TTHERM_00024330	LSM4.TTHERM_00024330	NT2	26.8975	26.8418	26.9225	26.6592	26.8207	26.7057	26.7515	log2.LFQ.int	0.0135751	0.14105	26.9225	26.6592	26.9225
TTHERM_00024330	LSM4.TTHERM_00024330	NT3	26.3614	26.5419	26.2575	26.1901	25.7922	26.1098	26.2838	log2.LFQ.int	0.0433307	0.172641	26.5419	25.7922	26.5419
TTHERM_00024330	LSM4.TTHERM_00024330	UV	26.7689	27.0116	27.0638	26.8266	26.7743	26.5427	26.6695	log2.LFQ.int	0.0402836	0.199901	27.0638	26.5427	27.0638
TTHERM_00024410	NA	CPT	29.8418	29.631	28.9495	27.9105	28.7303	28.6052	28.2689	log2.LFQ.int	0.0803105	0.853176	29.8418	27.9105	29.8418
TTHERM_00024410	NA	HP	31.7965	31.7385	31.7385	31.6286	31.4421	31.0932	31.079	log2.LFQ.int	0.0204347	0.470852	31.7965	31.079	31.7965
TTHERM_00024410	NA	HU	29.5327	29.8666	30.1461	30.5162	30.7345	30.8945	31.2007	log2.LFQ.int	0.0502544	0.808125	31.2007	29.5327	31.2007
TTHERM_00024410	NA	IR	28.8935	28.8862	29.2479	29.643	30.016	30.5531	30.9925	log2.LFQ.int	0.0842295	1.21388	30.9925	28.8862	30.9925
TTHERM_00024410	NA	MMS	32.1498	31.3631	31.5071	31.4964	31.1597	31.0057	30.8349	log2.LFQ.int	0.0314034	0.419077	32.1498	30.8349	32.1498
TTHERM_00024410	NA	NT1	31.7819	31.9851	31.935	32.1884	32.3164	32.2802	32.5653	log2.LFQ.int	0.0170576	0.338286	32.5653	31.7819	32.5653
TTHERM_00024410	NA	NT2	29.6748	30.1582	30.0526	30.3809	30.5422	30.723	30.8282	log2.LFQ.int	0.0288454	0.527181	30.8282	29.6748	30.8282
TTHERM_00024410	NA	NT3	30.0608	30.3049	30.2427	30.5567	30.6325	30.8048	30.869	log2.LFQ.int	0.022741	0.444848	30.869	30.0608	30.869
TTHERM_00024410	NA	UV	29.3797	29.2776	28.9151	28.9573	29.0091	29.278	29.5749	log2.LFQ.int	0.026711	0.345621	29.5749	28.9151	29.5749
TTHERM_00024420	NA	CPT	25.4227	25.2406	25.3095	25.8064	25.4681	25.2825	25.2951	log2.LFQ.int	0.0846058	0.156628	25.8064	25.2406	25.8064
TTHERM_00024420	NA	HP	25.7427	25.9348	26.0271	26.4042	26.1803	25.906	26.0584	log2.LFQ.int	0.0541212	0.198976	26.4042	25.7427	26.4042
TTHERM_00024420	NA	HU	25.4493	25.5711	25.4732	25.9992	25.5119	25.4009	25.6819	log2.LFQ.int	0.0695966	0.165269	25.9992	25.4009	25.9992
TTHERM_00024420	NA	IR	25.4785	25.5086	25.7385	26.0079	25.658	25.4262	25.5312	log2.LFQ.int	0.107537	0.204717	26.0079	25.4262	26.0079
TTHERM_00024420	NA	MMS	26.1781	25.923	25.8044	26.2622	25.9641	25.9545	25.8677	log2.LFQ.int	0.0553085	0.175758	26.2622	25.8044	26.2622
TTHERM_00024420	NA	NT1	26.1145	25.8762	26.0023	26.5198	25.9584	25.8965	26.1622	log2.LFQ.int	0.0513716	0.210935	26.5198	25.8762	26.5198
TTHERM_00024420	NA	NT2	25.6301	25.4109	25.5546	25.9633	25.4689	25.5177	25.4913	log2.LFQ.int	0.0323637	0.112209	25.9633	25.4109	25.9633
TTHERM_00024420	NA	NT3	25.3152	25.3359	25.4577	25.695	25.3348	25.2257	25.4254	log2.LFQ.int	0.0391365	0.116563	25.695	25.2257	25.695
TTHERM_00024420	NA	UV	25.1467	25.245	25.459	25.5571	25.4832	25.4776	25.3754	log2.LFQ.int	0.0803324	0.170144	25.5571	25.1467	25.5571
TTHERM_00024440	FAS1.TTHERM_00024440	CPT	28.1306	28.3388	28.4726	28.5131	28.6551	28.6112	28.6873	log2.LFQ.int	0.0240519	0.227436	28.6873	28.1306	28.6873
TTHERM_00024440	FAS1.TTHERM_00024440	HP	28.114	28.3297	28.2865	28.2171	28.2097	28.0059	28.0031	log2.LFQ.int	0.0162327	0.19186	28.3297	28.0031	28.3297
TTHERM_00024440	FAS1.TTHERM_00024440	HU	28.1939	28.0904	28.1099	28.2645	28.2446	28.2527	28.241	log2.LFQ.int	0.00876602	0.096758	28.2645	28.0904	28.2645
TTHERM_00024440	FAS1.TTHERM_00024440	IR	27.8102	27.7025	27.7032	27.2771	27.8083	27.8307	28.0082	log2.LFQ.int	0.0344475	0.117595	28.0082	27.2771	28.0082
TTHERM_00024440	FAS1.TTHERM_00024440	MMS	28.1583	28.4493	28.4208	28.6951	28.592	28.5444	28.5068	log2.LFQ.int	0.0209525	0.133153	28.6951	28.1583	28.6951
TTHERM_00024440	FAS1.TTHERM_00024440	NT1	28.3045	28.3524	28.4413	28.4137	28.5244	28.5517	28.4636	log2.LFQ.int	0.0104356	0.110941	28.5517	28.3045	28.5517
TTHERM_00024440	FAS1.TTHERM_00024440	NT2	28.1145	28.2765	28.2202	27.5859	28.3056	28.1604	28.2927	log2.LFQ.int	0.0209115	0.147148	28.3056	27.5859	28.3056
TTHERM_00024440	FAS1.TTHERM_00024440	NT3	28.0228	28.2009	28.1071	28.2463	28.1926	28.2041	28.283	log2.LFQ.int	0.00941573	0.0753165	28.283	28.0228	28.283
TTHERM_00024440	FAS1.TTHERM_00024440	UV	27.7874	27.9802	28.1481	28.1129	27.9125	27.7099	27.8821	log2.LFQ.int	0.0243381	0.211775	28.1481	27.7099	28.1481
TTHERM_00024450	PML1.TTHERM_00024450	CPT	25.4163	26.3203	26.0477	25.8143	26.4136	26.7567	27.2839	log2.LFQ.int	0.164449	0.654174	27.2839	25.4163	27.2839
TTHERM_00024450	PML1.TTHERM_00024450	HP	26.0558	26.0493	25.8547	26.1669	26.1657	26.0843	26.0991	log2.LFQ.int	0.0243171	0.0798278	26.1669	25.8547	26.1669
TTHERM_00024450	PML1.TTHERM_00024450	HU	25.4837	25.3098	25.3668	25.9555	25.5612	25.4311	25.5187	log2.LFQ.int	0.0747907	0.141012	25.9555	25.3098	25.9555
TTHERM_00024450	PML1.TTHERM_00024450	IR	25.3797	25.3487	25.5291	25.9486	25.5273	25.5101	25.4424	log2.LFQ.int	0.10843	0.117154	25.9486	25.3487	25.9486
TTHERM_00024450	PML1.TTHERM_00024450	MMS	26.058	25.9934	25.7236	26.4033	25.8956	25.7859	25.9969	log2.LFQ.int	0.0736273	0.186725	26.4033	25.7236	26.4033
TTHERM_00024450	PML1.TTHERM_00024450	NT1	25.8476	25.9123	25.9527	26.5736	25.8773	25.9952	25.9413	log2.LFQ.int	0.0496158	0.0791506	26.5736	25.8476	26.5736
TTHERM_00024450	PML1.TTHERM_00024450	NT2	25.5047	25.5459	25.4292	25.9296	25.6505	25.4365	25.5338	log2.LFQ.int	0.031227	0.127579	25.9296	25.4292	25.9296
TTHERM_00024450	PML1.TTHERM_00024450	NT3	25.3696	25.2734	25.1176	25.8482	25.196	25.2939	25.1797	log2.LFQ.int	0.0609769	0.143942	25.8482	25.1176	25.8482
TTHERM_00024450	PML1.TTHERM_00024450	UV	25.1351	25.2854	25.9922	25.6482	25.9385	25.5152	25.4603	log2.LFQ.int	0.151509	0.420522	25.9922	25.1351	25.9922
TTHERM_00024460	NA	CPT	25.3747	25.3239	25.2352	25.8472	25.3313	25.2295	25.1792	log2.LFQ.int	0.0960356	0.120683	25.8472	25.1792	25.8472
TTHERM_00024460	NA	HP	25.7935	25.8192	25.9723	26.2538	25.9241	26.1243	26.228	log2.LFQ.int	0.0493536	0.304478	26.2538	25.7935	26.2538
TTHERM_00024460	NA	HU	25.4461	25.6619	25.4976	26.1165	25.3898	25.3829	25.5205	log2.LFQ.int	0.0838411	0.173209	26.1165	25.3829	26.1165
TTHERM_00024460	NA	IR	25.2917	25.3653	25.4997	26.0556	25.416	25.3688	25.3808	log2.LFQ.int	0.136847	0.0907979	26.0556	25.2917	26.0556
TTHERM_00024460	NA	MMS	25.9222	26.0268	25.7645	26.4224	25.8529	25.9957	25.9726	log2.LFQ.int	0.0650552	0.123669	26.4224	25.7645	26.4224
TTHERM_00024460	NA	NT1	25.9233	26.1167	26.0447	26.4923	26.0898	26.0279	25.979	log2.LFQ.int	0.0397163	0.0998249	26.4923	25.9233	26.4923
TTHERM_00024460	NA	NT2	25.4752	25.4871	25.4122	25.9399	25.4361	25.4166	25.4482	log2.LFQ.int	0.028606	0.0547747	25.9399	25.4122	25.9399
TTHERM_00024460	NA	NT3	25.0684	25.0857	25.1557	25.8548	25.249	25.3894	25.4901	log2.LFQ.int	0.0776136	0.31908	25.8548	25.0684	25.8548
TTHERM_00024460	NA	UV	25.195	25.1289	25.5478	25.7606	25.4055	25.5624	25.5034	log2.LFQ.int	0.116558	0.254866	25.7606	25.1289	25.7606
TTHERM_00024480	MVP1.TTHERM_00024480	CPT	30.0372	30.1723	30.0994	30.126	30.0624	30.0755	30.1925	log2.LFQ.int	0.00521039	0.0801654	30.1925	30.0372	30.1925
TTHERM_00024480	MVP1.TTHERM_00024480	HP	30.2947	30.2328	30.186	30.2595	29.9909	30.2208	30.074	log2.LFQ.int	0.00882763	0.116166	30.2947	29.9909	30.2947
TTHERM_00024480	MVP1.TTHERM_00024480	HU	30.1296	29.9194	29.938	29.9807	30.0875	30.0846	30.0128	log2.LFQ.int	0.00724837	0.126701	30.1296	29.9194	30.1296
TTHERM_00024480	MVP1.TTHERM_00024480	IR	29.934	29.9455	29.9873	29.9869	29.8502	30.0234	30.0091	log2.LFQ.int	0.00552662	0.0584589	30.0234	29.8502	30.0234
TTHERM_00024480	MVP1.TTHERM_00024480	MMS	30.0512	30.236	30.234	30.3566	30.2974	30.5284	30.3438	log2.LFQ.int	0.0125565	0.115187	30.5284	30.0512	30.5284
TTHERM_00024480	MVP1.TTHERM_00024480	NT1	30.1226	30.1063	30.1903	30.0882	30.3153	30.2601	30.2774	log2.LFQ.int	0.00764453	0.154302	30.3153	30.0882	30.3153
TTHERM_00024480	MVP1.TTHERM_00024480	NT2	30.0775	30.0137	29.9302	30.1299	30.0659	30.1536	30.1023	log2.LFQ.int	0.00542117	0.0762659	30.1536	29.9302	30.1536
TTHERM_00024480	MVP1.TTHERM_00024480	NT3	29.9847	30.0061	30.0214	30.141	30.0307	30.0954	30.0652	log2.LFQ.int	0.0043322	0.0665398	30.141	29.9847	30.141
TTHERM_00024480	MVP1.TTHERM_00024480	UV	29.9825	29.9976	30.0279	30.1035	29.9793	30.0333	29.9859	log2.LFQ.int	0.00380151	0.0464474	30.1035	29.9793	30.1035
TTHERM_000245449	PWP2.TTHERM_000245449	CPT	26.3972	26.2323	26.44	26.7365	27.0148	27.2284	27.3566	log2.LFQ.int	0.0942998	0.702989	27.3566	26.2323	27.3566
TTHERM_000245449	PWP2.TTHERM_000245449	HP	25.9081	25.8198	25.6693	26.2506	26.3713	26.7972	26.4479	log2.LFQ.int	0.0969791	0.545695	26.7972	25.6693	26.7972
TTHERM_000245449	PWP2.TTHERM_000245449	HU	26.3538	26.8563	26.0964	26.0894	26.5052	26.5614	25.8604	log2.LFQ.int	0.0831471	0.44036	26.8563	25.8604	26.8563
TTHERM_000245449	PWP2.TTHERM_000245449	IR	27.106	26.7656	27.1806	26.9391	26.3952	26.7904	25.5692	log2.LFQ.int	0.132995	0.442177	27.1806	25.5692	27.1806
TTHERM_000245449	PWP2.TTHERM_000245449	MMS	25.8859	26.0539	26.5182	26.4894	26.721	26.7721	27.0147	log2.LFQ.int	0.103034	0.474911	27.0147	25.8859	27.0147
TTHERM_000245449	PWP2.TTHERM_000245449	NT1	25.8293	25.8814	25.8689	26.5483	26.0629	25.9517	26.083	log2.LFQ.int	0.0554366	0.197803	26.5483	25.8293	26.5483
TTHERM_000245449	PWP2.TTHERM_000245449	NT2	26.1758	26.1729	26.1065	25.7178	25.866	25.3897	25.4175	log2.LFQ.int	0.0613098	0.572074	26.1758	25.3897	26.1758
TTHERM_000245449	PWP2.TTHERM_000245449	NT3	25.8308	25.6466	25.8619	25.8809	25.4712	25.3897	25.3605	log2.LFQ.int	0.0557928	0.41587	25.8809	25.3605	25.8809
TTHERM_000245449	PWP2.TTHERM_000245449	UV	26.3569	27.4899	27.8669	27.7809	27.6159	27.3806	27.2869	log2.LFQ.int	0.0803021	0.364672	27.8669	26.3569	27.8669
TTHERM_000245499	RPB9.TTHERM_000245499	CPT	27.3017	27.5818	27.8496	28.1698	28.1771	28.3638	28.6219	log2.LFQ.int	0.0651684	0.554759	28.6219	27.3017	28.6219
TTHERM_000245499	RPB9.TTHERM_000245499	HP	27.2228	27.0373	27.1545	27.0279	26.842	26.9604	27.0794	log2.LFQ.int	0.0214258	0.1228	27.2228	26.842	27.2228
TTHERM_000245499	RPB9.TTHERM_000245499	HU	27.241	27.2636	27.0637	26.6464	26.6632	27.0818	26.6764	log2.LFQ.int	0.0507079	0.491576	27.2636	26.6464	27.2636
TTHERM_000245499	RPB9.TTHERM_000245499	IR	27.3855	27.4041	27.1061	27.0287	27.2303	27.3125	27.3364	log2.LFQ.int	0.0286378	0.192747	27.4041	27.0287	27.4041
TTHERM_000245499	RPB9.TTHERM_000245499	MMS	26.9624	27.0379	26.9321	26.7682	27.1799	27.3661	27.4042	log2.LFQ.int	0.0469668	0.325795	27.4042	26.7682	27.4042
TTHERM_000245499	RPB9.TTHERM_000245499	NT1	26.9014	26.7875	27.2248	26.7742	27.0718	27.0371	26.7062	log2.LFQ.int	0.0334	0.273603	27.2248	26.7062	27.2248
TTHERM_000245499	RPB9.TTHERM_000245499	NT2	27.5355	27.3088	27.1695	27.1173	27.2021	27.0062	27.0681	log2.LFQ.int	0.0209292	0.162722	27.5355	27.0062	27.5355
TTHERM_000245499	RPB9.TTHERM_000245499	NT3	27.3339	27.4147	27.6106	27.061	27.3773	27.3594	27.4397	log2.LFQ.int	0.0204013	0.0805505	27.6106	27.061	27.6106
TTHERM_000245499	RPB9.TTHERM_000245499	UV	27.5281	27.8731	27.8299	27.7333	27.7815	27.5915	27.7214	log2.LFQ.int	0.0197386	0.149192	27.8731	27.5281	27.8731
TTHERM_000252299	NA	CPT	25.3983	25.4773	25.2493	25.858	25.3576	25.1302	25.3787	log2.LFQ.int	0.102909	0.134344	25.858	25.1302	25.858
TTHERM_000252299	NA	HP	25.9422	25.8506	25.8583	26.4001	26.0825	25.98	25.9487	log2.LFQ.int	0.044086	0.130975	26.4001	25.8506	26.4001
TTHERM_000252299	NA	HU	25.8966	26.6703	26.7453	26.642	26.8291	26.989	26.9892	log2.LFQ.int	0.0680116	0.252908	26.9892	25.8966	26.9892
TTHERM_000252299	NA	IR	25.4471	25.5701	25.4672	25.996	25.483	25.4349	25.3728	log2.LFQ.int	0.106496	0.0855651	25.996	25.3728	25.996
TTHERM_000252299	NA	MMS	25.7305	25.9777	25.7857	26.2491	26.0879	25.9284	25.7782	log2.LFQ.int	0.0669785	0.250873	26.2491	25.7305	26.2491
TTHERM_000252299	NA	NT1	25.7566	25.9851	26.0289	26.4514	26.0618	26.0411	26.0072	log2.LFQ.int	0.0451778	0.0552471	26.4514	25.7566	26.4514
TTHERM_000252299	NA	NT2	25.6142	25.6639	25.5169	25.822	25.4683	26.2111	26.1104	log2.LFQ.int	0.0533494	0.400584	26.2111	25.4683	26.2111
TTHERM_000252299	NA	NT3	25.1081	25.1522	25.2963	25.7875	26.1422	25.3544	25.323	log2.LFQ.int	0.0945249	0.346696	26.1422	25.1081	26.1422
TTHERM_000252299	NA	UV	25.3433	25.3274	25.4192	25.7667	25.4778	25.4283	25.575	log2.LFQ.int	0.0747844	0.145161	25.7667	25.3274	25.7667
TTHERM_000255619	NA	CPT	28.8063	28.9232	28.8121	28.7615	28.7745	28.7341	28.6329	log2.LFQ.int	0.00986657	0.0613869	28.9232	28.6329	28.9232
TTHERM_000255619	NA	HP	29.4044	29.4743	29.3123	29.5705	29.6942	29.5229	29.4055	log2.LFQ.int	0.0119449	0.14176	29.6942	29.3123	29.6942
TTHERM_000255619	NA	HU	28.8904	28.979	29.0531	29.1446	29.1587	29.2448	29.445	log2.LFQ.int	0.0190535	0.185706	29.445	28.8904	29.445
TTHERM_000255619	NA	IR	28.7644	28.7515	28.9335	28.9242	28.8658	28.9236	28.9271	log2.LFQ.int	0.0091151	0.110611	28.9335	28.7515	28.9335
TTHERM_000255619	NA	MMS	29.3867	29.1537	29.0918	29.0396	29.0992	28.7998	28.6632	log2.LFQ.int	0.0264005	0.206731	29.3867	28.6632	29.3867
TTHERM_000255619	NA	NT1	29.2382	29.4407	29.325	29.2901	29.3791	29.4546	29.5704	log2.LFQ.int	0.0109136	0.140096	29.5704	29.2382	29.5704
TTHERM_000255619	NA	NT2	28.9055	28.9228	28.9381	29.1141	29.0216	29.0906	29.2817	log2.LFQ.int	0.0112427	0.171862	29.2817	28.9055	29.2817
TTHERM_000255619	NA	NT3	28.6994	28.7205	28.8177	28.9301	28.829	28.9115	29.0661	log2.LFQ.int	0.0123884	0.151732	29.0661	28.6994	29.0661
TTHERM_000255619	NA	UV	28.692	28.7196	28.7095	28.7904	28.8712	28.8646	28.9262	log2.LFQ.int	0.0110556	0.153383	28.9262	28.692	28.9262
TTHERM_000255649	PBP1.TTHERM_000255649	CPT	28.1879	28.1165	27.9574	27.6814	27.8135	27.9261	27.4784	log2.LFQ.int	0.0362749	0.289475	28.1879	27.4784	28.1879
TTHERM_000255649	PBP1.TTHERM_000255649	HP	27.1962	27.955	27.3188	27.0637	27.5863	27.498	27.6696	log2.LFQ.int	0.0461761	0.370455	27.955	27.0637	27.955
TTHERM_000255649	PBP1.TTHERM_000255649	HU	28.1906	28.1366	27.987	27.9132	27.8692	28.0379	27.8259	log2.LFQ.int	0.0188692	0.19606	28.1906	27.8259	28.1906
TTHERM_000255649	PBP1.TTHERM_000255649	IR	27.9991	27.9444	28.1002	28.0379	27.8829	27.9275	27.3875	log2.LFQ.int	0.0322151	0.113271	28.1002	27.3875	28.1002
TTHERM_000255649	PBP1.TTHERM_000255649	MMS	27.6823	26.7879	27.6591	27.7026	26.912	26.6339	26.7707	log2.LFQ.int	0.0901073	0.891371	27.7026	26.6339	27.7026
TTHERM_000255649	PBP1.TTHERM_000255649	NT1	28.0148	27.7597	27.6071	27.7627	27.8321	27.753	27.8836	log2.LFQ.int	0.0166933	0.101506	28.0148	27.6071	28.0148
TTHERM_000255649	PBP1.TTHERM_000255649	NT2	27.9964	27.9962	27.9966	28.0938	28.1039	28.1179	28.0942	log2.LFQ.int	0.00547193	0.102539	28.1179	27.9962	28.1179
TTHERM_000255649	PBP1.TTHERM_000255649	NT3	28.0624	28.1664	28.2214	28.1319	28.1568	28.1202	28.1538	log2.LFQ.int	0.00526654	0.035577	28.2214	28.0624	28.2214
TTHERM_000255649	PBP1.TTHERM_000255649	UV	28.2781	28.0822	28.0362	28.3088	28.1856	28.0349	28.0795	log2.LFQ.int	0.0156947	0.173993	28.3088	28.0349	28.3088
TTHERM_000263389	MVP1.TTHERM_000263389	CPT	25.0769	25.764	25.7467	25.7831	25.9143	25.9307	26.0786	log2.LFQ.int	0.101837	0.167208	26.0786	25.0769	26.0786
TTHERM_000263389	MVP1.TTHERM_000263389	HP	25.9116	25.8414	25.515	26.2963	25.9785	26.0719	25.8783	log2.LFQ.int	0.0625755	0.165346	26.2963	25.515	26.2963
TTHERM_000263389	MVP1.TTHERM_000263389	HU	25.5238	25.3493	25.4727	26.0405	25.7187	25.5416	25.4848	log2.LFQ.int	0.0770506	0.151364	26.0405	25.3493	26.0405
TTHERM_000263389	MVP1.TTHERM_000263389	IR	25.4648	25.4754	25.341	25.8612	25.5196	25.4891	25.3387	log2.LFQ.int	0.100215	0.101454	25.8612	25.3387	25.8612
TTHERM_000263389	MVP1.TTHERM_000263389	MMS	25.7959	25.8388	25.8578	26.4604	25.8306	25.9211	26.203	log2.LFQ.int	0.0769803	0.227352	26.4604	25.7959	26.4604
TTHERM_000263389	MVP1.TTHERM_000263389	NT1	25.9292	25.9546	25.8875	26.5446	26.0384	25.9588	26.0623	log2.LFQ.int	0.046035	0.108454	26.5446	25.8875	26.5446
TTHERM_000263389	MVP1.TTHERM_000263389	NT2	25.523	25.5991	25.478	25.895	25.4296	25.5221	25.4845	log2.LFQ.int	0.0267228	0.0797604	25.895	25.4296	25.895
TTHERM_000263389	MVP1.TTHERM_000263389	NT3	25.1978	25.2117	25.2321	26.0147	25.2738	25.2039	25.2517	log2.LFQ.int	0.0595733	0.0549614	26.0147	25.1978	26.0147
TTHERM_000263389	MVP1.TTHERM_000263389	UV	25.1938	25.1004	25.2511	25.7351	25.6989	25.5425	25.5192	log2.LFQ.int	0.136026	0.398229	25.7351	25.1004	25.7351
TTHERM_000267919	MRD1.TTHERM_000267919	CPT	29.5156	29.5498	29.8781	30.0852	30.0111	30.3057	30.3609	log2.LFQ.int	0.030935	0.481525	30.3609	29.5156	30.3609
TTHERM_000267919	MRD1.TTHERM_000267919	HP	29.1102	29.2356	29.4321	29.4118	29.2487	29.2718	29.1256	log2.LFQ.int	0.012286	0.161174	29.4321	29.1102	29.4321
TTHERM_000267919	MRD1.TTHERM_000267919	HU	29.4975	29.4084	29.361	29.5002	29.4377	29.4	29.2567	log2.LFQ.int	0.00815907	0.0870803	29.5002	29.2567	29.5002
TTHERM_000267919	MRD1.TTHERM_000267919	IR	29.6532	29.6489	29.364	29.493	29.4001	29.2385	29.3521	log2.LFQ.int	0.0169183	0.212935	29.6532	29.2385	29.6532
TTHERM_000267919	MRD1.TTHERM_000267919	MMS	29.3812	29.461	29.5423	29.71	29.4079	29.6393	29.4993	log2.LFQ.int	0.0124233	0.15635	29.71	29.3812	29.71
TTHERM_000267919	MRD1.TTHERM_000267919	NT1	29.2852	28.9372	29.182	28.9663	29.1299	28.9172	28.9493	log2.LFQ.int	0.0143219	0.212718	29.2852	28.9172	29.2852
TTHERM_000267919	MRD1.TTHERM_000267919	NT2	29.4951	29.4657	29.4163	29.4622	29.543	29.4156	29.434	log2.LFQ.int	0.00361022	0.0552625	29.543	29.4156	29.543
TTHERM_000267919	MRD1.TTHERM_000267919	NT3	29.5023	29.4465	29.426	29.5155	29.469	29.4324	29.3829	log2.LFQ.int	0.00404861	0.0564274	29.5155	29.3829	29.5155
TTHERM_000267919	MRD1.TTHERM_000267919	UV	29.5012	29.7476	29.7338	29.8079	29.6331	29.487	29.4445	log2.LFQ.int	0.0146171	0.246619	29.8079	29.4445	29.8079
TTHERM_000268279	NA	CPT	30.8677	30.8945	30.6732	30.7895	30.5514	30.491	30.3434	log2.LFQ.int	0.0170954	0.307331	30.8945	30.3434	30.8945
TTHERM_000268279	NA	HP	31.4638	31.2552	31.8959	31.4836	31.3416	31.3478	31.1557	log2.LFQ.int	0.015467	0.175312	31.8959	31.1557	31.8959
TTHERM_000268279	NA	HU	30.8227	31.4301	31.4638	31.5878	31.5904	31.5457	31.5038	log2.LFQ.int	0.0152672	0.119804	31.5904	30.8227	31.5904
TTHERM_000268279	NA	IR	30.8536	30.6634	30.5728	30.5357	30.6843	30.7914	30.7514	log2.LFQ.int	0.0100796	0.153254	30.8536	30.5357	30.8536
TTHERM_000268279	NA	MMS	31.3455	31.7302	31.8653	32.0138	31.7644	31.7967	31.8139	log2.LFQ.int	0.0130521	0.0922772	32.0138	31.3455	32.0138
TTHERM_000268279	NA	NT1	31.3989	31.4102	31.4846	31.345	31.4153	31.3785	31.2401	log2.LFQ.int	0.0050063	0.0510217	31.4846	31.2401	31.4846
TTHERM_000268279	NA	NT2	30.833	30.8776	30.9365	30.8959	30.9049	30.8697	30.8555	log2.LFQ.int	0.00225453	0.0378173	30.9365	30.833	30.9365
TTHERM_000268279	NA	NT3	30.9075	30.8473	30.9545	30.9814	30.9437	31.0558	30.9326	log2.LFQ.int	0.00438079	0.0478662	31.0558	30.8473	31.0558
TTHERM_000268279	NA	UV	30.9383	30.7319	30.856	31.2009	31.4199	31.433	31.2698	log2.LFQ.int	0.0218701	0.447725	31.433	30.7319	31.433
TTHERM_000268319	YTA6.TTHERM_000268319	CPT	27.8682	26.9466	26.8509	27.0267	27.7353	27.5576	26.3526	log2.LFQ.int	0.0993023	0.747721	27.8682	26.3526	27.8682
TTHERM_000268319	YTA6.TTHERM_000268319	HP	26.7887	26.7352	26.0152	26.845	27.6788	27.0073	26.1972	log2.LFQ.int	0.100859	0.459912	27.6788	26.0152	27.6788
TTHERM_000268319	YTA6.TTHERM_000268319	HU	28.0459	27.678	27.8088	27.3584	27.2592	27.0678	27.687	log2.LFQ.int	0.0530415	0.439063	28.0459	27.0678	28.0459
TTHERM_000268319	YTA6.TTHERM_000268319	IR	27.6978	27.7539	27.9844	26.0403	27.1905	27.8934	27.4904	log2.LFQ.int	0.112113	0.483223	27.9844	26.0403	27.9844
TTHERM_000268319	YTA6.TTHERM_000268319	MMS	27.8492	28.3302	27.4148	26.211	27.3304	27.879	27.6259	log2.LFQ.int	0.106316	0.491504	28.3302	26.211	28.3302
TTHERM_000268319	YTA6.TTHERM_000268319	NT1	27.9398	26.0375	27.3329	26.5131	27.1187	27.3915	27.0201	log2.LFQ.int	0.103891	0.595612	27.9398	26.0375	27.9398
TTHERM_000268319	YTA6.TTHERM_000268319	NT2	27.6075	28.0837	27.814	27.7533	27.8279	27.7767	27.2838	log2.LFQ.int	0.0250108	0.140527	28.0837	27.2838	28.0837
TTHERM_000268319	YTA6.TTHERM_000268319	NT3	27.923	27.6696	27.6617	27.0231	27.7027	27.666	27.7606	log2.LFQ.int	0.0292756	0.0677853	27.923	27.0231	27.923
TTHERM_000268319	YTA6.TTHERM_000268319	UV	27.3872	27.2318	27.3025	26.9368	27.3077	27.2381	27.23	log2.LFQ.int	0.0233186	0.0742099	27.3872	26.9368	27.3872
TTHERM_000268328	CYC8.TTHERM_000268328	CPT	27.0941	26.9206	26.8486	26.5009	26.8639	26.6045	26.4335	log2.LFQ.int	0.052209	0.339525	27.0941	26.4335	27.0941
TTHERM_000268328	CYC8.TTHERM_000268328	HP	26.7483	25.6308	27.1647	27.0009	25.8097	26.5715	27.1828	log2.LFQ.int	0.12457	0.892212	27.1828	25.6308	27.1828
TTHERM_000268328	CYC8.TTHERM_000268328	HU	27.648	27.4711	27.376	27.4257	27.3166	27.3392	27.3496	log2.LFQ.int	0.0169247	0.103947	27.648	27.3166	27.648
TTHERM_000268328	CYC8.TTHERM_000268328	IR	27.3962	27.2339	27.2612	27.299	27.4722	27.3262	27.2853	log2.LFQ.int	0.015981	0.0879391	27.4722	27.2339	27.4722
TTHERM_000268328	CYC8.TTHERM_000268328	MMS	25.816	25.9005	26.0861	26.3373	25.9519	25.93	26.0333	log2.LFQ.int	0.0548652	0.14447	26.3373	25.816	26.3373
TTHERM_000268328	CYC8.TTHERM_000268328	NT1	25.8528	25.9017	26.5678	26.3289	25.9732	26.0235	26.0482	log2.LFQ.int	0.0596359	0.251097	26.5678	25.8528	26.5678
TTHERM_000268328	CYC8.TTHERM_000268328	NT2	27.4208	27.5177	27.4708	27.5569	27.5693	27.4537	27.4649	log2.LFQ.int	0.00640154	0.0780084	27.5693	27.4208	27.5693
TTHERM_000268328	CYC8.TTHERM_000268328	NT3	27.2091	27.0008	27.2686	27.3652	27.2031	27.2286	27.0617	log2.LFQ.int	0.0171226	0.116176	27.3652	27.0008	27.3652
TTHERM_000268328	CYC8.TTHERM_000268328	UV	27.0981	26.4569	26.7658	26.1777	26.0047	25.3677	26.4895	log2.LFQ.int	0.15378	0.536433	27.0981	25.3677	27.0981
TTHERM_000279829	HYR1.TTHERM_000279829	CPT	27.0219	26.8311	26.4332	26.0073	26.5894	25.1223	25.1526	log2.LFQ.int	0.215986	1.13032	27.0219	25.1223	27.0219
TTHERM_000279829	HYR1.TTHERM_000279829	HP	27.783	27.3026	27.0652	27.1144	28.3238	28.4935	27.8921	log2.LFQ.int	0.0809366	0.899421	28.4935	27.0652	28.4935
TTHERM_000279829	HYR1.TTHERM_000279829	HU	26.2031	26.4295	26.6793	26.8157	27.4084	27.2283	27.3521	log2.LFQ.int	0.0917864	0.735815	27.4084	26.2031	27.4084
TTHERM_000279829	HYR1.TTHERM_000279829	IR	25.4858	25.4548	25.421	25.892	26.29	26.495	26.363	log2.LFQ.int	0.197129	0.856166	26.495	25.421	26.495
TTHERM_000279829	HYR1.TTHERM_000279829	MMS	27.1649	26.8471	26.7825	26.4474	28.0385	27.99	27.462	log2.LFQ.int	0.115555	0.911126	28.0385	26.4474	28.0385
TTHERM_000279829	HYR1.TTHERM_000279829	NT1	27.755	28.084	28.0823	27.7133	28.1565	27.3781	27.4987	log2.LFQ.int	0.0414613	0.47717	28.1565	27.3781	28.1565
TTHERM_000279829	HYR1.TTHERM_000279829	NT2	26.727	26.9042	26.9504	27.0843	26.9992	27.3238	27.0999	log2.LFQ.int	0.0235567	0.164828	27.3238	26.727	27.3238
TTHERM_000279829	HYR1.TTHERM_000279829	NT3	26.4192	26.9246	27.2789	27.197	27.5859	27.5031	27.0431	log2.LFQ.int	0.0555156	0.407161	27.5859	26.4192	27.5859
TTHERM_000279829	HYR1.TTHERM_000279829	UV	25.1308	26.8607	25.387	27.036	26.5502	27.697	27.8683	log2.LFQ.int	0.249978	1.39788	27.8683	25.1308	27.8683
TTHERM_000283749	NA	CPT	28.8222	28.7139	28.7742	28.6661	28.6495	28.6473	28.4822	log2.LFQ.int	0.0125969	0.0955855	28.8222	28.4822	28.8222
TTHERM_000283749	NA	HP	28.2492	28.5946	28.7033	28.8391	28.9438	28.6516	28.6904	log2.LFQ.int	0.0231115	0.148036	28.9438	28.2492	28.9438
TTHERM_000283749	NA	HU	29.0953	29.045	29.1567	29.3031	29.194	29.1902	29.3035	log2.LFQ.int	0.0100649	0.122581	29.3035	29.045	29.3035
TTHERM_000283749	NA	IR	29.1474	29.0678	29.102	29.0244	29.1216	29.143	29.2122	log2.LFQ.int	0.00706382	0.0602597	29.2122	29.0244	29.2122
TTHERM_000283749	NA	MMS	28.4549	28.6232	28.6784	28.5431	28.9233	28.9518	28.9603	log2.LFQ.int	0.0253386	0.354433	28.9603	28.4549	28.9603
TTHERM_000283749	NA	NT1	28.8653	28.5999	28.4317	28.0998	27.9337	28.6897	28.263	log2.LFQ.int	0.039846	0.463443	28.8653	27.9337	28.8653
TTHERM_000283749	NA	NT2	29.1331	29.1888	29.1648	29.1587	29.1157	29.1633	29.1575	log2.LFQ.int	0.00191214	0.0187154	29.1888	29.1157	29.1888
TTHERM_000283749	NA	NT3	28.7839	28.7685	28.7397	28.8959	28.8773	28.8261	28.9368	log2.LFQ.int	0.00724428	0.110386	28.9368	28.7397	28.9368
TTHERM_000283749	NA	UV	28.8288	28.8173	28.8438	28.7067	28.5994	28.6372	28.6271	log2.LFQ.int	0.0126433	0.190883	28.8438	28.5994	28.8438
TTHERM_000284109	NA	CPT	25.3535	25.3002	25.3062	25.8367	25.3299	25.2638	25.3465	log2.LFQ.int	0.0727421	0.0468042	25.8367	25.2638	25.8367
TTHERM_000284109	NA	HP	26.6912	26.6951	26.7962	26.6287	26.516	26.8856	26.4775	log2.LFQ.int	0.0286502	0.173291	26.8856	26.4775	26.8856
TTHERM_000284109	NA	HU	25.4661	25.7364	25.4813	26.0124	25.5823	25.38	25.4471	log2.LFQ.int	0.0763665	0.202767	26.0124	25.38	26.0124
TTHERM_000284109	NA	IR	25.5413	25.5673	25.5902	26.1294	25.5022	26.0981	26.2501	log2.LFQ.int	0.145738	0.559493	26.2501	25.5022	26.2501
TTHERM_000284109	NA	MMS	26.5857	26.4936	26.8273	26.5308	26.0861	26.3689	25.875	log2.LFQ.int	0.0861323	0.330702	26.8273	25.875	26.8273
TTHERM_000284109	NA	NT1	26.6652	26.8647	26.4886	26.6004	26.659	26.3881	26.2069	log2.LFQ.int	0.043049	0.223779	26.8647	26.2069	26.8647
TTHERM_000284109	NA	NT2	25.6082	25.5995	25.4864	26.0877	25.6365	26.2729	25.661	log2.LFQ.int	0.0500354	0.27048	26.2729	25.4864	26.2729
TTHERM_000284109	NA	NT3	25.189	25.2761	25.248	25.8841	25.2625	25.3311	26.1509	log2.LFQ.int	0.0889797	0.352356	26.1509	25.189	26.1509
TTHERM_000284109	NA	UV	25.1285	25.3582	25.2933	25.8935	26.3526	26.5337	27.1527	log2.LFQ.int	0.262196	1.11741	27.1527	25.1285	27.1527
TTHERM_000284239	NA	CPT	26.1172	26.0121	25.7234	25.695	26.3334	26.1991	26.4236	log2.LFQ.int	0.0848686	0.398486	26.4236	25.695	26.4236
TTHERM_000284239	NA	HP	26.0307	25.9072	25.7769	26.2165	25.8221	25.9904	25.9357	log2.LFQ.int	0.0386441	0.145905	26.2165	25.7769	26.2165
TTHERM_000284239	NA	HU	26.1319	25.9774	26.0712	26.0179	26.1184	26.1452	26.0415	log2.LFQ.int	0.0176285	0.0954462	26.1452	25.9774	26.1452
TTHERM_000284239	NA	IR	26.3137	25.5265	25.9668	25.9737	25.4783	25.4559	25.3869	log2.LFQ.int	0.171554	0.5031	26.3137	25.3869	26.3137
TTHERM_000284239	NA	MMS	25.9744	26.0138	25.8568	26.5452	26.7779	27.1328	26.7647	log2.LFQ.int	0.129698	0.777206	27.1328	25.8568	27.1328
TTHERM_000284239	NA	NT1	25.9779	25.7841	25.8625	26.5158	25.8368	25.9531	25.9824	log2.LFQ.int	0.0533012	0.13051	26.5158	25.7841	26.5158
TTHERM_000284239	NA	NT2	25.4327	25.384	25.6328	26.0314	25.564	26.0254	26.4905	log2.LFQ.int	0.0727324	0.530094	26.4905	25.384	26.4905
TTHERM_000284239	NA	NT3	25.7328	25.1388	25.2859	25.9752	25.1778	25.2859	25.3376	log2.LFQ.int	0.0796789	0.303354	25.9752	25.1388	25.9752
TTHERM_000284239	NA	UV	25.8102	25.8682	25.9692	26.2528	26.0298	25.741	26.0846	log2.LFQ.int	0.061419	0.218022	26.2528	25.741	26.2528
TTHERM_00028470	NA	CPT	31.4324	31.4705	31.3197	31.261	31.1343	30.8832	30.8368	log2.LFQ.int	0.0189835	0.367262	31.4705	30.8368	31.4705
TTHERM_00028470	NA	HP	31.4515	31.4371	31.5881	31.5512	31.4954	31.4025	31.4299	log2.LFQ.int	0.00470367	0.0898547	31.5881	31.4025	31.5881
TTHERM_00028470	NA	HU	31.6752	31.4878	31.5713	31.6649	31.6396	31.73	31.7664	log2.LFQ.int	0.00651741	0.0971901	31.7664	31.4878	31.7664
TTHERM_00028470	NA	IR	31.5811	31.362	31.3223	31.262	31.2259	31.4163	31.5612	log2.LFQ.int	0.0107323	0.196557	31.5811	31.2259	31.5811
TTHERM_00028470	NA	MMS	31.4603	31.51	31.5352	31.5276	31.5845	31.3965	31.3092	log2.LFQ.int	0.00684246	0.103022	31.5845	31.3092	31.5845
TTHERM_00028470	NA	NT1	31.5096	31.432	31.4977	31.6549	31.4675	31.5269	31.3705	log2.LFQ.int	0.00590646	0.068483	31.6549	31.3705	31.6549
TTHERM_00028470	NA	NT2	31.574	31.5215	31.5374	31.6428	31.5682	31.665	31.6744	log2.LFQ.int	0.00374333	0.101111	31.6744	31.5215	31.6744
TTHERM_00028470	NA	NT3	31.3309	31.2828	31.2575	31.3681	31.3567	31.369	31.3952	log2.LFQ.int	0.00325902	0.0616937	31.3952	31.2575	31.3952
TTHERM_00028470	NA	UV	31.3475	31.2506	31.0953	30.9878	30.8821	30.9576	31.0403	log2.LFQ.int	0.0129095	0.200291	31.3475	30.8821	31.3475
TTHERM_00028510	NA	CPT	27.5666	28.4436	27.6713	27.755	27.4278	28.0607	27.89	log2.LFQ.int	0.0498024	0.356373	28.4436	27.4278	28.4436
TTHERM_00028510	NA	HP	27.7183	28.0217	27.7708	27.2901	28.3194	28.3998	28.0606	log2.LFQ.int	0.0503583	0.445414	28.3998	27.2901	28.3998
TTHERM_00028510	NA	HU	28.5661	27.587	27.8006	26.9002	27.1708	26.7985	26.6288	log2.LFQ.int	0.110207	0.844446	28.5661	26.6288	28.5661
TTHERM_00028510	NA	IR	28.3145	27.7556	28.1446	27.3122	27.7506	28.7777	28.2425	log2.LFQ.int	0.0735116	0.525421	28.7777	27.3122	28.7777
TTHERM_00028510	NA	MMS	27.1811	27.2426	28.0569	27.4903	27.7794	28.7437	28.2765	log2.LFQ.int	0.0896665	0.800218	28.7437	27.1811	28.7437
TTHERM_00028510	NA	NT1	27.583	27.7765	28.51	26.3249	28.5532	28.5171	27.5762	log2.LFQ.int	0.100934	0.933974	28.5532	26.3249	28.5532
TTHERM_00028510	NA	NT2	28.5286	28.2965	28.1865	28.2163	28.2029	27.7924	27.6587	log2.LFQ.int	0.0290469	0.266992	28.5286	27.6587	28.5286
TTHERM_00028510	NA	NT3	28.3033	28.0217	28.291	28.2589	28.268	27.9015	28.0322	log2.LFQ.int	0.017509	0.252561	28.3033	27.9015	28.3033
TTHERM_00028510	NA	UV	27.4391	27.4458	27.5717	27.9168	27.6129	27.7495	27.9822	log2.LFQ.int	0.0350529	0.324433	27.9822	27.4391	27.9822
TTHERM_00028530	ZTA1.TTHERM_00028530	CPT	32.3348	32.2535	32.2185	32.3714	32.4924	32.6531	32.7593	log2.LFQ.int	0.0130025	0.278605	32.7593	32.2185	32.7593
TTHERM_00028530	ZTA1.TTHERM_00028530	HP	32.7045	32.7816	32.8392	32.612	32.6169	32.5389	32.4475	log2.LFQ.int	0.00830437	0.167615	32.8392	32.4475	32.8392
TTHERM_00028530	ZTA1.TTHERM_00028530	HU	32.4749	33.1433	33.2573	33.3998	33.3931	33.4696	33.4461	log2.LFQ.int	0.0168792	0.222661	33.4696	32.4749	33.4696
TTHERM_00028530	ZTA1.TTHERM_00028530	IR	32.1613	32.2119	32.2378	32.088	32.1271	32.2844	32.3943	log2.LFQ.int	0.00711932	0.116861	32.3943	32.088	32.3943
TTHERM_00028530	ZTA1.TTHERM_00028530	MMS	32.7828	33.0535	33.1585	33.2638	33.1993	33.1702	33.2022	log2.LFQ.int	0.00842624	0.09471	33.2638	32.7828	33.2638
TTHERM_00028530	ZTA1.TTHERM_00028530	NT1	32.7396	32.7465	32.6798	32.7528	32.6974	32.6589	32.6602	log2.LFQ.int	0.00240859	0.0730335	32.7528	32.6589	32.7528
TTHERM_00028530	ZTA1.TTHERM_00028530	NT2	32.4384	32.4816	32.5176	32.6016	32.5566	32.6807	32.7355	log2.LFQ.int	0.00585592	0.141568	32.7355	32.4384	32.7355
TTHERM_00028530	ZTA1.TTHERM_00028530	NT3	32.4019	32.5031	32.3941	32.542	32.5547	32.6173	32.6274	log2.LFQ.int	0.0053725	0.133467	32.6274	32.3941	32.6274
TTHERM_00028530	ZTA1.TTHERM_00028530	UV	32.4677	32.4364	32.548	32.4862	32.5176	32.5191	32.5315	log2.LFQ.int	0.00251837	0.0483272	32.548	32.4364	32.548
TTHERM_000285449	NA	CPT	26.7629	26.7595	26.7986	26.343	26.7648	25.8737	25.6518	log2.LFQ.int	0.110827	0.655481	26.7986	25.6518	26.7986
TTHERM_000285449	NA	HP	27.0894	26.6859	27.0226	27.0498	26.7625	26.8856	27.1169	log2.LFQ.int	0.0295909	0.24552	27.1169	26.6859	27.1169
TTHERM_000285449	NA	HU	26.9545	26.9247	26.8736	26.6006	26.958	26.8115	27.0833	log2.LFQ.int	0.0276943	0.113731	27.0833	26.6006	27.0833
TTHERM_000285449	NA	IR	26.7941	26.8857	27.0375	26.432	26.8013	26.8388	26.6954	log2.LFQ.int	0.0440153	0.117533	27.0375	26.432	27.0375
TTHERM_000285449	NA	MMS	27.0057	26.7857	26.7639	26.4317	26.7623	26.6577	26.4317	log2.LFQ.int	0.0470573	0.230149	27.0057	26.4317	27.0057
TTHERM_000285449	NA	NT1	26.2485	26.6877	26.646	26.7335	26.564	26.4367	26.338	log2.LFQ.int	0.0381816	0.279484	26.7335	26.2485	26.7335
TTHERM_000285449	NA	NT2	27.0314	27.0332	27.0627	27.1598	27.0677	27.0241	26.9061	log2.LFQ.int	0.00888803	0.0374905	27.1598	26.9061	27.1598
TTHERM_000285449	NA	NT3	26.9305	26.9357	26.9387	27.1308	27.1645	26.9086	26.8462	log2.LFQ.int	0.0166953	0.115197	27.1645	26.8462	27.1645
TTHERM_000285449	NA	UV	26.7742	26.8931	26.5714	26.2715	26.7116	26.1443	25.931	log2.LFQ.int	0.0936698	0.535041	26.8931	25.931	26.8931
TTHERM_00028550	NA	CPT	26.0309	25.9815	25.9581	25.9631	25.9927	25.6315	25.7394	log2.LFQ.int	0.0453517	0.138372	26.0309	25.6315	26.0309
TTHERM_00028550	NA	HP	25.8905	25.8294	25.6594	26.2509	25.9604	26.0884	26.1572	log2.LFQ.int	0.0551812	0.262824	26.2509	25.6594	26.2509
TTHERM_00028550	NA	HU	25.9858	26.1684	26.1466	26.0158	26.0888	26.1917	26.1888	log2.LFQ.int	0.0222776	0.126309	26.1917	25.9858	26.1917
TTHERM_00028550	NA	IR	25.8655	25.9517	25.5722	26.0844	25.8758	25.8726	25.8737	log2.LFQ.int	0.0599306	0.0447179	26.0844	25.5722	26.0844
TTHERM_00028550	NA	MMS	25.7647	25.7545	25.9144	26.224	26.2514	26.0242	25.9366	log2.LFQ.int	0.0690041	0.284548	26.2514	25.7545	26.2514
TTHERM_00028550	NA	NT1	26.0129	25.8746	25.78	26.4405	25.8756	25.8516	26.1376	log2.LFQ.int	0.0549067	0.212125	26.4405	25.78	26.4405
TTHERM_00028550	NA	NT2	25.3031	26.2167	25.8402	26.0107	25.7673	26.2354	26.2486	log2.LFQ.int	0.0574957	0.422287	26.2486	25.3031	26.2486
TTHERM_00028550	NA	NT3	25.9111	25.9337	25.9105	25.9184	25.672	25.7791	25.8098	log2.LFQ.int	0.0205922	0.120318	25.9337	25.672	25.9337
TTHERM_00028550	NA	UV	25.7681	25.9649	26.1117	25.753	26.0912	25.863	26.0917	log2.LFQ.int	0.0539422	0.275845	26.1117	25.753	26.1117
TTHERM_00028580	SPT5	CPT	30.3201	30.6921	30.8825	30.9534	30.963	30.879	30.8013	log2.LFQ.int	0.0160493	0.171256	30.963	30.3201	30.963
TTHERM_00028580	SPT5	HP	30.3433	30.4212	30.3504	30.5102	30.4018	30.4792	30.4557	log2.LFQ.int	0.00518667	0.0913533	30.5102	30.3433	30.5102
TTHERM_00028580	SPT5	HU	30.5785	30.5879	30.5452	30.5912	30.5544	30.5825	30.5748	log2.LFQ.int	0.00136204	0.0205763	30.5912	30.5452	30.5912
TTHERM_00028580	SPT5	IR	30.7011	30.7094	30.6462	30.6572	30.5468	30.4845	30.4589	log2.LFQ.int	0.00896648	0.163515	30.7094	30.4589	30.7094
TTHERM_00028580	SPT5	MMS	30.2663	30.5358	30.468	30.5211	30.6439	30.7292	30.8373	log2.LFQ.int	0.01583	0.192006	30.8373	30.2663	30.8373
TTHERM_00028580	SPT5	NT1	30.2092	30.3283	30.2336	30.0612	30.2522	30.1426	30.2537	log2.LFQ.int	0.00700286	0.0770492	30.3283	30.0612	30.3283
TTHERM_00028580	SPT5	NT2	30.6327	30.5684	30.5008	30.6041	30.5488	30.5217	30.4952	log2.LFQ.int	0.00359816	0.0750173	30.6327	30.4952	30.6327
TTHERM_00028580	SPT5	NT3	30.3192	30.3293	30.2853	30.3411	30.289	30.3299	30.2532	log2.LFQ.int	0.00237217	0.0424644	30.3411	30.2532	30.3411
TTHERM_00028580	SPT5	UV	30.3993	30.7518	30.823	30.767	30.6502	30.5177	30.47	log2.LFQ.int	0.013925	0.265535	30.823	30.3993	30.823
TTHERM_00028590	NCL1.TTHERM_00028590	CPT	27.7252	27.7024	27.5935	27.7422	27.6811	27.3764	27.2679	log2.LFQ.int	0.0280844	0.228864	27.7422	27.2679	27.7422
TTHERM_00028590	NCL1.TTHERM_00028590	HP	28.0663	27.3977	27.767	27.8145	28.0023	28.0115	27.4982	log2.LFQ.int	0.0354574	0.37424	28.0663	27.3977	28.0663
TTHERM_00028590	NCL1.TTHERM_00028590	HU	27.9134	27.7795	27.6487	27.6444	27.5099	27.022	27.1837	log2.LFQ.int	0.0491208	0.367271	27.9134	27.022	27.9134
TTHERM_00028590	NCL1.TTHERM_00028590	IR	28.0496	28.3157	28.3089	28.3054	28.1604	27.8932	27.5597	log2.LFQ.int	0.0405188	0.335739	28.3157	27.5597	28.3157
TTHERM_00028590	NCL1.TTHERM_00028590	MMS	27.6822	27.6535	27.7961	27.3998	27.7194	27.7794	27.8808	log2.LFQ.int	0.0232092	0.119906	27.8808	27.3998	27.8808
TTHERM_00028590	NCL1.TTHERM_00028590	NT1	27.4388	26.9924	27.2601	26.8282	27.2819	27.2086	26.7065	log2.LFQ.int	0.0442955	0.360688	27.4388	26.7065	27.4388
TTHERM_00028590	NCL1.TTHERM_00028590	NT2	27.8872	27.7465	27.7527	27.4526	27.4133	27.3062	27.0823	log2.LFQ.int	0.0328826	0.389839	27.8872	27.0823	27.8872
TTHERM_00028590	NCL1.TTHERM_00028590	NT3	27.7197	27.6114	27.7267	27.7385	27.5533	27.37	27.3051	log2.LFQ.int	0.0220441	0.261546	27.7385	27.3051	27.7385
TTHERM_00028590	NCL1.TTHERM_00028590	UV	27.6106	27.996	27.8826	28.0867	28.0745	27.8811	27.6458	log2.LFQ.int	0.0287343	0.271775	28.0867	27.6106	28.0867
TTHERM_00028640	NA	CPT	27.3747	27.194	26.7627	25.6325	26.2362	26.7973	26.7496	log2.LFQ.int	0.125733	0.502756	27.3747	25.6325	27.3747
TTHERM_00028640	NA	HP	27.0315	25.7337	25.7847	26.409	27.1361	27.0907	27.5381	log2.LFQ.int	0.135911	1.01657	27.5381	25.7337	27.5381
TTHERM_00028640	NA	HU	26.432	25.1803	27.6006	26.0112	25.5829	25.548	25.3665	log2.LFQ.int	0.228662	0.764284	27.6006	25.1803	27.6006
TTHERM_00028640	NA	IR	26.4146	26.5475	27.6238	26.7018	26.7836	26.027	25.4038	log2.LFQ.int	0.192324	0.521898	27.6238	25.4038	27.6238
TTHERM_00028640	NA	MMS	27.7096	27.5254	26.6208	26.4657	27.0907	26.6256	25.8133	log2.LFQ.int	0.144117	0.764855	27.7096	25.8133	27.7096
TTHERM_00028640	NA	NT1	27.2172	25.6959	26.8967	26.5046	25.8765	27.4895	26.6868	log2.LFQ.int	0.131274	0.866378	27.4895	25.6959	27.4895
TTHERM_00028640	NA	NT2	26.576	26.8991	26.9698	25.7717	26.5307	25.3981	25.466	log2.LFQ.int	0.105974	1.1187	26.9698	25.3981	26.9698
TTHERM_00028640	NA	NT3	27.1127	27.0331	27.046	26.3367	26.9133	26.487	27.0344	log2.LFQ.int	0.0439442	0.340051	27.1127	26.3367	27.1127
TTHERM_00028640	NA	UV	26.9265	26.7035	27.5352	27.1895	27.6598	27.6634	27.7887	log2.LFQ.int	0.0737006	0.603583	27.7887	26.7035	27.7887
TTHERM_00028700	NA	CPT	29.5362	29.6279	29.5941	29.8029	29.845	30.0805	30.198	log2.LFQ.int	0.0237028	0.351772	30.198	29.5362	30.198
TTHERM_00028700	NA	HP	29.7294	29.6531	29.9289	29.8386	29.7787	29.6555	30.021	log2.LFQ.int	0.0124502	0.191264	30.021	29.6531	30.021
TTHERM_00028700	NA	HU	29.9881	30.0971	30.1246	30.2138	30.2104	30.2282	30.138	log2.LFQ.int	0.00713973	0.101245	30.2282	29.9881	30.2282
TTHERM_00028700	NA	IR	29.8279	29.9526	29.8536	29.9877	29.9586	29.9143	30.0172	log2.LFQ.int	0.00687638	0.0892159	30.0172	29.8279	30.0172
TTHERM_00028700	NA	MMS	29.7559	29.7471	29.8139	29.4999	29.6384	29.3383	29.6876	log2.LFQ.int	0.0162312	0.182314	29.8139	29.3383	29.8139
TTHERM_00028700	NA	NT1	29.8717	29.5934	29.8557	29.7299	29.7511	29.7755	29.9374	log2.LFQ.int	0.0100069	0.12318	29.9374	29.5934	29.9374
TTHERM_00028700	NA	NT2	29.9939	29.9885	30.0359	30.1488	30.062	30.1263	30.0825	log2.LFQ.int	0.00457877	0.0895012	30.1488	29.9885	30.1488
TTHERM_00028700	NA	NT3	29.6171	29.7015	29.734	29.7507	29.7659	29.8926	29.726	log2.LFQ.int	0.00644845	0.0445073	29.8926	29.6171	29.8926
TTHERM_00028700	NA	UV	29.5136	29.4197	29.4558	29.5416	29.4011	29.3979	29.5704	log2.LFQ.int	0.00728629	0.117203	29.5704	29.3979	29.5704
TTHERM_00028740	RPL12	CPT	35.5928	35.5902	35.583	35.5417	35.4502	35.4518	35.3572	log2.LFQ.int	0.00408611	0.135581	35.5928	35.3572	35.5928
TTHERM_00028740	RPL12	HP	35.7772	35.766	35.8311	35.7044	35.7348	35.7687	35.7778	log2.LFQ.int	0.00166	0.0271204	35.8311	35.7044	35.8311
TTHERM_00028740	RPL12	HU	35.3252	35.4547	35.2882	35.2614	35.2051	35.1639	35.093	log2.LFQ.int	0.00550535	0.122255	35.4547	35.093	35.4547
TTHERM_00028740	RPL12	IR	35.4577	35.5279	35.5262	35.5537	35.6527	35.5193	35.3602	log2.LFQ.int	0.00407163	0.0523308	35.6527	35.3602	35.6527
TTHERM_00028740	RPL12	MMS	35.7206	35.6635	35.5463	35.6899	35.5606	35.5873	35.6437	log2.LFQ.int	0.00314393	0.102811	35.7206	35.5463	35.7206
TTHERM_00028740	RPL12	NT1	35.7902	35.8301	35.7473	35.8608	35.6964	35.6738	35.5268	log2.LFQ.int	0.00489841	0.125093	35.8608	35.5268	35.8608
TTHERM_00028740	RPL12	NT2	35.4566	35.3716	35.3711	35.3844	35.319	35.311	35.1239	log2.LFQ.int	0.00396316	0.062963	35.4566	35.1239	35.4566
TTHERM_00028740	RPL12	NT3	35.6484	35.663	35.6184	35.5793	35.6198	35.5331	35.4114	log2.LFQ.int	0.00347713	0.077894	35.663	35.4114	35.663
TTHERM_00028740	RPL12	UV	35.6303	35.4923	35.4473	35.486	35.4853	35.4769	35.452	log2.LFQ.int	0.00236576	0.0246882	35.6303	35.4473	35.6303
TTHERM_00028780	NA	CPT	30.0178	29.9736	29.9819	29.9025	29.869	29.7998	29.7085	log2.LFQ.int	0.0102747	0.143362	30.0178	29.7085	30.0178
[truncated: 96,266 more rows]

## Sheet: README
Supplemental Table S7. Enrichment values per protein
