# Supplementary material for: A systems view on DNA damage response kinetics in Tetrahymena
Source: HighWire-hosted journal article supplement (doi:10.1101/gr.281000.125), 2026-01-28
Supplement: Supplemental_Table_S8.xlsx [file Supplemental_Table_S8.xlsx]

## Sheet: Supplemental_Table_S8
gene_name	treatment	score	H0	H1	H2	H3	H4	H6	H8	gini	max	min	big
TTHERM_02293890	MMS	L2FC_CPM	-0.72279	-0.0574715	0.526577	-0.141687	-0.114742	-0.158122	0.0215139	0.0188575	0.526577	-0.72279	-0.72279
TTHERM_02293890	HP	L2FC_CPM	-0.312714	0.491438	0.663585	-0.124782	-0.11628	-0.164647	-0.131881	0.0227264	0.663585	-0.312714	0.663585
TTHERM_02293890	HU	L2FC_CPM	0.770971	1.73629	1.46197	1.62903	-0.416527	-0.57107	-0.398206	0.0946264	1.73629	-0.57107	1.73629
TTHERM_02293890	IR	L2FC_CPM	-0.454792	0.964427	0.10518	0.48968	-0.783642	-0.697329	-0.170799	0.0537226	0.964427	-0.783642	0.964427
TTHERM_02293890	CPT	L2FC_CPM	-0.11644	1.59603	0.239195	0.023702	1.41832	1.54483	0.954677	0.033144	1.59603	-0.11644	1.59603
TTHERM_02293890	UV	L2FC_CPM	0.160363	1.06329	-0.388301	-1.13834	-0.459236	0.115833	-0.387906	0.0569969	1.06329	-1.13834	-1.13834
TTHERM_001287953	MMS	L2FC_CPM	0.375432	0.266586	0.412094	-0.0793769	0.159379	-0.295232	0.114067	0.013973	0.412094	-0.295232	0.412094
TTHERM_001287953	HP	L2FC_CPM	0.472723	0.225766	1.10278	-0.0833527	0.159379	-0.0553348	0.157046	0.0242453	1.10278	-0.0833527	1.10278
TTHERM_001287953	HU	L2FC_CPM	0.216102	-0.0102333	-0.610259	-0.8554	-0.305487	-0.081542	0.626418	0.0543063	0.626418	-0.8554	-0.8554
TTHERM_001287953	IR	L2FC_CPM	0.0966256	0.524905	0.519078	-0.323191	0.42465	0.394022	0.155103	0.022808	0.524905	-0.323191	0.524905
TTHERM_001287953	CPT	L2FC_CPM	0.306092	0	0.497535	-0.161104	0.701431	0.12165	-0.319926	0.0175845	0.701431	-0.319926	0.701431
TTHERM_001287953	UV	L2FC_CPM	0.745233	0	0.497535	0.685286	0.942664	-0.282293	0.0548463	0.0363738	0.942664	-0.282293	0.942664
TTHERM_02013450	MMS	L2FC_CPM	-0.21978	-0.0947043	-0.189702	-0.534549	-0.806171	0.0318394	-0.708586	0.0189447	0.0318394	-0.806171	-0.806171
TTHERM_02013450	HP	L2FC_CPM	0.334477	0.0128074	0.11202	-0.312633	-0.338499	0.477008	-0.21574	0.0218177	0.477008	-0.338499	0.477008
TTHERM_02013450	HU	L2FC_CPM	-0.277508	-0.720032	-0.0519639	0.919394	0.174116	-0.101784	-1.74034	0.0868906	0.919394	-1.74034	-1.74034
TTHERM_02013450	IR	L2FC_CPM	-1.27846	-0.269252	0.166049	0.48759	-1.4688	-1.12724	0.0750234	0.070049	0.48759	-1.4688	-1.4688
TTHERM_02013450	CPT	L2FC_CPM	0.544518	0.113215	-0.896466	-0.111601	0.257273	0.623966	-0.31304	0.0252366	0.623966	-0.896466	-0.896466
TTHERM_02013450	UV	L2FC_CPM	0.313027	0.499274	-0.316437	1.23549	-0.420673	0.553288	0.413129	0.0436182	1.23549	-0.420673	1.23549
TTHERM_02476160	MMS	L2FC_CPM	-0.451982	0.0322285	0.00248336	-0.349082	-0.165674	0.204768	-0.255277	0.0135261	0.204768	-0.451982	-0.451982
TTHERM_02476160	HP	L2FC_CPM	0.437621	0.238613	0.00248336	-0.156162	-0.405157	0.513563	-0.22397	0.0238418	0.513563	-0.405157	0.513563
TTHERM_02476160	HU	L2FC_CPM	0	-0.910501	-0.30544	0.117554	-0.774315	0.372615	0.973102	0.0700481	0.973102	-0.910501	0.973102
TTHERM_02476160	IR	L2FC_CPM	-0.381861	0	0.298587	0.112981	-0.758018	-0.479362	0.598971	0.0402704	0.598971	-0.758018	-0.758018
TTHERM_02476160	CPT	L2FC_CPM	0.154394	0.0123325	0.136406	-0.381902	-0.853647	0.158385	0.853572	0.0241379	0.853572	-0.853647	-0.853647
TTHERM_02476160	UV	L2FC_CPM	0.154394	0.410906	-0.490244	0	-0.680828	0.205945	1.04735	0.047211	1.04735	-0.680828	1.04735
TTHERM_002653356	MMS	L2FC_CPM	0.294678	-0.206384	0	-0.530803	-0.024863	-0.239897	0.149181	0.0155489	0.294678	-0.530803	-0.530803
TTHERM_002653356	HP	L2FC_CPM	0.132934	0	0	-0.0718149	0.224261	0.070818	-0.017911	0.00672687	0.224261	-0.0718149	0.224261
TTHERM_002653356	HU	L2FC_CPM	0.971609	0.528459	-0.250982	1.0994	-0.389489	0.643409	-0.945172	0.0767131	1.0994	-0.945172	1.0994
TTHERM_002653356	IR	L2FC_CPM	-0.104857	-0.402397	-0.213058	1.10352	0.0592774	0.18859	-0.867556	0.0480541	1.10352	-0.867556	1.10352
TTHERM_002653356	CPT	L2FC_CPM	0.436515	-0.397036	0.334085	0.35599	-0.17805	1.09595	0.00447707	0.0225819	1.09595	-0.397036	1.09595
TTHERM_002653356	UV	L2FC_CPM	-0.131201	0	0.497535	0.0373817	0.0110824	0.410776	-0.685128	0.0310091	0.497535	-0.685128	-0.685128
TTHERM_01299620	MMS	L2FC_CPM	-0.12238	1.50792	1.283	1.19987	1.27677	1.63249	1.61724	0.0249308	1.63249	-0.12238	1.63249
TTHERM_01299620	HP	L2FC_CPM	-0.37067	-0.681855	-0.856594	-0.238568	-0.718872	-0.487978	0.0738151	0.0232503	0.0738151	-0.856594	-0.856594
TTHERM_01299620	HU	L2FC_CPM	0.318258	0.0525154	0.0125458	0.281655	0.218387	-0.164578	0.0643819	0.0173538	0.318258	-0.164578	0.318258
TTHERM_01299620	IR	L2FC_CPM	-0.983005	-0.308263	-0.555505	-0.286486	-0.202856	-0.287825	-0.0515347	0.0243228	-0.0515347	-0.983005	-0.983005
TTHERM_01299620	CPT	L2FC_CPM	-0.661342	0.272229	-0.0203939	-0.00519362	-0.126271	-0.285967	-0.330163	0.0143757	0.272229	-0.661342	-0.661342
TTHERM_01299620	UV	L2FC_CPM	-0.591815	0.603093	0.126083	0.0231758	-0.113138	-0.0433472	-0.347271	0.0313511	0.603093	-0.591815	0.603093
TTHERM_02646280	MMS	L2FC_CPM	-0.366246	0	-0.121303	0	0	-0.0164669	0.157046	0.0081896	0.157046	-0.366246	-0.366246
TTHERM_02646280	HP	L2FC_CPM	-0.0260563	0.0885708	0.0604634	0	0	-0.0164669	0.157046	0.00438055	0.157046	-0.0260563	0.157046
TTHERM_02646280	HU	L2FC_CPM	0.273109	-0.682736	0.466967	1.01118	0.448374	-0.112386	-0.243137	0.0563371	1.01118	-0.682736	1.01118
TTHERM_02646280	IR	L2FC_CPM	-0.171496	-0.691387	0.377171	0.578951	0.198537	-0.312269	0.0109895	0.0360772	0.578951	-0.691387	-0.691387
TTHERM_02646280	CPT	L2FC_CPM	0.222887	-0.398573	-0.279509	0.121708	-0.648171	-0.0744251	-0.930143	0.0208251	0.222887	-0.930143	-0.930143
TTHERM_02646280	UV	L2FC_CPM	0.154324	-0.411657	0.497535	0.492456	0.0216145	0.846845	-0.868912	0.0487159	0.846845	-0.868912	-0.868912
TTHERM_02422110	MMS	L2FC_CPM	-0.62528	0.359599	0.280651	-0.582768	0	0.102787	0	0.0214625	0.359599	-0.62528	-0.62528
TTHERM_02422110	HP	L2FC_CPM	-0.115199	0.728153	0.460955	0.170623	-0.101928	-0.155882	0	0.0214931	0.728153	-0.155882	0.728153
TTHERM_02422110	HU	L2FC_CPM	0.0954497	-0.909374	0.0815991	-0.464854	1.16282	0.459574	-0.545508	0.0726927	1.16282	-0.909374	1.16282
TTHERM_02422110	IR	L2FC_CPM	0.460123	0.316656	0.329996	-0.432228	1.16282	-0.262256	-0.165006	0.0422736	1.16282	-0.432228	1.16282
TTHERM_02422110	CPT	L2FC_CPM	-0.332203	-0.568595	-1.03446	0.157773	-0.620958	-0.298638	0.163574	0.0213707	0.163574	-1.03446	-1.03446
TTHERM_02422110	UV	L2FC_CPM	0	-0.445702	-0.44909	0	-0.952232	-0.0480097	-0.000930096	0.0292757	0	-0.952232	-0.952232
TTHERM_002653520	MMS	L2FC_CPM	0	-0.126152	0	0	-0.0192538	-0.0287648	0	0.00203295	0	-0.126152	-0.126152
TTHERM_002653520	HP	L2FC_CPM	0	0.18736	0	-0.261538	-0.0192538	-0.0475376	0	0.00786594	0.18736	-0.261538	-0.261538
TTHERM_002653520	HU	L2FC_CPM	0.0646472	-0.476638	0	-0.172987	-0.387848	0.454874	-0.318845	0.0339471	0.454874	-0.476638	-0.476638
TTHERM_002653520	IR	L2FC_CPM	0.518389	0	0	0	-0.458689	0.454874	0.210033	0.0258551	0.518389	-0.458689	0.518389
TTHERM_002653520	CPT	L2FC_CPM	0.444763	-0.00233251	0	0	0.501538	0	-0.0624271	0.00973523	0.501538	-0.0624271	0.501538
TTHERM_002653520	UV	L2FC_CPM	0.444763	-0.404143	0	0	-0.437833	-0.45845	-0.0281352	0.0271401	0.444763	-0.45845	-0.45845
TTHERM_01164050	MMS	L2FC_CPM	-0.319292	-0.949207	-0.20534	-0.366592	-0.213524	0.0845665	-0.245575	0.0162813	0.0845665	-0.949207	-0.949207
TTHERM_01164050	HP	L2FC_CPM	-0.73531	-1.40681	-0.0873915	-0.58354	-0.182241	0.325135	-0.467817	0.039332	0.325135	-1.40681	-1.40681
TTHERM_01164050	HU	L2FC_CPM	-0.427483	-0.0425066	-0.301231	-0.250191	-0.231525	0.239071	0.0371458	0.024466	0.239071	-0.427483	-0.427483
TTHERM_01164050	IR	L2FC_CPM	-0.66183	0.991226	0.320163	0.324327	0.320729	0.431004	0.116074	0.0348287	0.991226	-0.66183	0.991226
TTHERM_01164050	CPT	L2FC_CPM	0.147961	-0.0161029	0.336524	0.806476	1.09419	0.93973	0.999915	0.0203071	1.09419	-0.0161029	1.09419
TTHERM_01164050	UV	L2FC_CPM	-1.67559	-1.42267	-0.302639	-0.166816	0.0729093	-0.0102946	0.158149	0.0634857	0.158149	-1.67559	-1.67559
TTHERM_002653334	MMS	L2FC_CPM	0.305104	0.391231	0.255676	0.0850206	-0.474062	0.0469175	-0.537244	0.0202519	0.391231	-0.537244	-0.537244
TTHERM_002653334	HP	L2FC_CPM	0.150237	-0.77474	0.00110729	-0.833127	-0.709684	-0.624766	-1.23198	0.0346498	0.150237	-1.23198	-1.23198
TTHERM_002653334	HU	L2FC_CPM	-0.589004	0.316857	0.577628	1.06235	1.32709	0.405592	1.03196	0.0579361	1.32709	-0.589004	1.32709
TTHERM_002653334	IR	L2FC_CPM	0.502413	1.32281	0.260896	1.60022	0.906091	0.511152	0.457175	0.0354414	1.60022	0.260896	1.60022
TTHERM_002653334	CPT	L2FC_CPM	0.584607	1.04644	1.60236	0.743515	0.842164	0.523997	-0.368404	0.0257698	1.60236	-0.368404	1.60236
TTHERM_002653334	UV	L2FC_CPM	-0.390698	0.672551	0.807142	-0.468354	-0.242969	0.426056	-0.507266	0.0465957	0.807142	-0.507266	0.807142
TTHERM_00722920	MMS	L2FC_CPM	-0.10534	0.125087	0.721404	0.554032	0.406806	0.53566	0.197012	0.015776	0.721404	-0.10534	0.721404
TTHERM_00722920	HP	L2FC_CPM	-0.127632	-0.803644	-0.549797	-0.799272	-0.933946	-0.308284	-0.676376	0.0213314	-0.127632	-0.933946	-0.933946
TTHERM_00722920	HU	L2FC_CPM	0.112607	0.0678404	0.15493	0.284068	0.146199	0.0617658	0.246562	0.00852933	0.284068	0.0617658	0.284068
TTHERM_00722920	IR	L2FC_CPM	0.737044	-0.27888	-1.08504	-0.704186	-0.501399	-0.0131163	-0.0116267	0.0497115	0.737044	-1.08504	-1.08504
TTHERM_00722920	CPT	L2FC_CPM	-1.12791	-3.31507	-3.03301	-3.31032	-3.22572	-2.96646	-2.3542	0.0448093	-1.12791	-3.31507	-3.31507
TTHERM_00722920	UV	L2FC_CPM	0.224776	-0.521074	0.264151	0.0197282	0.0739049	0.252993	0.192764	0.0195773	0.264151	-0.521074	-0.521074
TTHERM_01620830	MMS	L2FC_CPM	-0.169128	-0.629841	0.534081	-0.0846079	-0.0397821	0.0663679	-0.501565	0.0214612	0.534081	-0.629841	-0.629841
TTHERM_01620830	HP	L2FC_CPM	0.415125	0.157143	0.534081	0.0671172	0.294603	0.0766835	-0.0173524	0.0134056	0.534081	-0.0173524	0.534081
TTHERM_01620830	HU	L2FC_CPM	0.409172	-1.03225	-0.408691	-0.938434	-0.277723	-0.762748	-0.491274	0.0550215	0.409172	-1.03225	-1.03225
TTHERM_01620830	IR	L2FC_CPM	0.642931	-0.026418	0.330493	-0.176709	0.157419	-0.514694	0.924855	0.039759	0.924855	-0.514694	0.924855
TTHERM_01620830	CPT	L2FC_CPM	0.38356	-0.426297	-0.947091	-0.430929	-0.758328	0.247789	0.346318	0.0267693	0.38356	-0.947091	-0.947091
TTHERM_01620830	UV	L2FC_CPM	-0.919652	-0.993919	-0.891245	-0.473722	-0.802687	1.21959	1.09169	0.0770069	1.21959	-0.993919	1.21959
TTHERM_001257658	MMS	L2FC_CPM	-0.500344	1.36067	-1.06182	-0.518165	-0.99884	-0.703083	-0.453456	0.0399154	1.36067	-1.06182	1.36067
TTHERM_001257658	HP	L2FC_CPM	-0.520888	0.167105	-0.197181	-0.704133	-0.833481	-0.642412	-1.24545	0.0330411	0.167105	-1.24545	-1.24545
TTHERM_001257658	HU	L2FC_CPM	-0.620387	1.13821	1.10355	0.280954	0.593634	0.118678	-0.14504	0.0634728	1.13821	-0.620387	1.13821
TTHERM_001257658	IR	L2FC_CPM	1.22024	-0.592177	-0.397889	-1.72758	-0.753545	-0.0729275	-0.480878	0.0720506	1.22024	-1.72758	-1.72758
TTHERM_001257658	CPT	L2FC_CPM	0.206755	-0.314432	0.821606	0.482493	-0.290057	-0.93555	-0.293268	0.0281735	0.821606	-0.93555	-0.93555
TTHERM_001257658	UV	L2FC_CPM	-0.663696	-0.872545	0.148774	-0.125555	-0.688014	-0.25426	-0.398149	0.0328215	0.148774	-0.872545	-0.872545
TTHERM_00760190	MMS	L2FC_CPM	-0.256671	0.995135	0.757353	0.789158	0.516651	0.65871	0.538897	0.0189441	0.995135	-0.256671	0.995135
TTHERM_00760190	HP	L2FC_CPM	0.200209	1.15851	0.689685	0.718146	0.34023	-0.278034	-0.130388	0.0331983	1.15851	-0.278034	1.15851
TTHERM_00760190	HU	L2FC_CPM	0.122446	0.309412	0.00507975	0.0887585	-0.0155519	-0.0796616	-0.00824834	0.0125448	0.309412	-0.0796616	0.309412
TTHERM_00760190	IR	L2FC_CPM	0.1082	-0.211241	-0.381089	-0.193016	-0.463206	-0.338528	-0.341734	0.0150288	0.1082	-0.463206	-0.463206
TTHERM_00760190	CPT	L2FC_CPM	1.25591	1.1885	1.23614	1.34409	1.12777	1.03028	1.0994	0.00467454	1.34409	1.03028	1.34409
TTHERM_00760190	UV	L2FC_CPM	0.692988	0.620328	0.25056	0.319974	0.0181515	-0.0833037	0.087583	0.0240216	0.692988	-0.0833037	0.692988
TTHERM_01608700	MMS	L2FC_CPM	0.585747	-3.00665	-1.06258	0.0906646	0.322617	0.342008	0.69606	0.0674068	0.69606	-3.00665	-3.00665
TTHERM_01608700	HP	L2FC_CPM	0.470619	-1.10461	-0.470006	1.58841	1.99146	-0.0021329	1.1757	0.0732782	1.99146	-1.10461	1.99146
TTHERM_01608700	HU	L2FC_CPM	0.317471	-2.66703	-1.28345	-0.901613	-0.260872	0.36172	0.508206	0.130486	0.508206	-2.66703	-2.66703
TTHERM_01608700	IR	L2FC_CPM	0.000229287	0.0115272	1.07818	0.389059	0.233489	-0.170267	0.0755999	0.0296916	1.07818	-0.170267	1.07818
TTHERM_01608700	CPT	L2FC_CPM	0.828547	0.114307	0.556039	0.725959	0.502519	0.420895	0.472562	0.0103053	0.828547	0.114307	0.828547
TTHERM_01608700	UV	L2FC_CPM	0.782952	-0.589546	0.506095	0.812719	0.187625	-0.107842	-0.0241293	0.0419	0.812719	-0.589546	0.812719
TTHERM_000614679	MMS	L2FC_CPM	-0.0313704	0.364669	0.441561	0.639933	0.617141	0.233146	0.0749289	0.0142085	0.639933	-0.0313704	0.639933
TTHERM_000614679	HP	L2FC_CPM	0.227291	-0.346567	-0.608379	-0.252919	-0.0984618	0.162668	0.138405	0.0213437	0.227291	-0.608379	-0.608379
TTHERM_000614679	HU	L2FC_CPM	0.592282	-0.403574	-0.00908785	-0.153356	-0.320852	0.463781	0.0120337	0.0387274	0.592282	-0.403574	0.592282
TTHERM_000614679	IR	L2FC_CPM	0.604728	0.331576	1.0968	0.802258	0.518948	1.16628	0.388992	0.0245319	1.16628	0.331576	1.16628
TTHERM_000614679	CPT	L2FC_CPM	-0.000459724	-0.0821818	0.069342	0.185795	0.0239025	-0.166141	-0.451724	0.00953574	0.185795	-0.451724	-0.451724
TTHERM_000614679	UV	L2FC_CPM	0.0386045	-0.380286	-0.909516	-0.263085	-0.356604	-0.987396	-0.706844	0.0343079	0.0386045	-0.987396	-0.987396
TTHERM_00947320	MMS	L2FC_CPM	0.846301	0.144883	-0.317562	0.343838	-0.249124	0.130746	-0.292979	0.0227618	0.846301	-0.317562	0.846301
TTHERM_00947320	HP	L2FC_CPM	0.559978	0.287872	0.0240936	0.364081	0	-0.0484363	0	0.0149234	0.559978	-0.0484363	0.559978
TTHERM_00947320	HU	L2FC_CPM	0.300923	-0.246672	0.631624	0.239001	0.472001	-0.3329	0.00288895	0.0370214	0.631624	-0.3329	0.631624
TTHERM_00947320	IR	L2FC_CPM	-0.596775	0.678203	0.889402	-0.148447	0.466503	0.0222407	0.710275	0.0423764	0.889402	-0.596775	0.889402
TTHERM_00947320	CPT	L2FC_CPM	0.904947	0.728983	0.0438433	0.850209	-0.448465	0.120752	0.264622	0.0231621	0.904947	-0.448465	0.904947
TTHERM_00947320	UV	L2FC_CPM	0.0276207	-0.41908	-0.150072	0.628625	-0.457471	0.0645526	-0.0843181	0.0296072	0.628625	-0.457471	0.628625
TTHERM_01406900	MMS	L2FC_CPM	-0.562369	0	0.0562243	-0.0990823	-0.561944	-0.115719	-0.448136	0.0152357	0.0562243	-0.562369	-0.562369
TTHERM_01406900	HP	L2FC_CPM	-0.25791	-0.175445	0.429832	0.0823004	-0.320652	0.341878	-0.105328	0.0199166	0.429832	-0.320652	0.429832
TTHERM_01406900	HU	L2FC_CPM	-1.01164	0.653506	-0.656822	-0.688242	0.755244	-0.506875	-0.791217	0.0737968	0.755244	-1.01164	-1.01164
TTHERM_01406900	IR	L2FC_CPM	-0.730788	-0.355272	-0.945503	0.935816	0.207663	-0.475372	-0.631455	0.0529822	0.935816	-0.945503	-0.945503
TTHERM_01406900	CPT	L2FC_CPM	0.981639	0.471986	0.753862	1.05737	0.229362	1.35069	0.523367	0.0177469	1.35069	0.229362	1.35069
TTHERM_01406900	UV	L2FC_CPM	0.865107	0.217429	-0.471714	0.961242	-0.501952	0.591289	0.51874	0.0471542	0.961242	-0.501952	0.961242
TTHERM_00703280	MMS	L2FC_CPM	0.0180556	-0.152263	-0.224106	-0.302402	0.152731	0.211132	-0.0532871	0.0110364	0.211132	-0.302402	-0.302402
TTHERM_00703280	HP	L2FC_CPM	-0.357924	-0.0636924	-0.139748	-0.302402	0.568432	0.202462	-0.0371912	0.0209462	0.568432	-0.357924	0.568432
TTHERM_00703280	HU	L2FC_CPM	-0.67414	0.953966	0.267326	0.484399	0.365794	1.66581	0.881689	0.0659404	1.66581	-0.67414	1.66581
TTHERM_00703280	IR	L2FC_CPM	4.93665	3.47848	2.58219	2.79275	1.3111	2.13816	-0.00938677	0.0924571	4.93665	-0.00938677	4.93665
TTHERM_00703280	CPT	L2FC_CPM	-0.736389	0.701464	3.39173	3.59473	2.125	2.31333	2.39851	0.059995	3.59473	-0.736389	3.59473
TTHERM_00703280	UV	L2FC_CPM	4.91867	5.00496	4.93964	4.00402	2.65042	3.09766	3.0039	0.0516956	5.00496	2.65042	5.00496
TTHERM_01288990	MMS	L2FC_CPM	-0.317516	-0.167655	0.539183	-0.404824	-0.0434368	-0.338645	-1.22466	0.0284134	0.539183	-1.22466	-1.22466
TTHERM_01288990	HP	L2FC_CPM	0.134466	-0.0626396	0.720645	-0.249331	-0.11328	0.201479	-0.527006	0.0262183	0.720645	-0.527006	0.720645
TTHERM_01288990	HU	L2FC_CPM	-0.547818	0.118623	-0.0956289	-0.751487	0.29776	-0.350084	-0.0436739	0.0410913	0.29776	-0.751487	-0.751487
TTHERM_01288990	IR	L2FC_CPM	0.0703279	-0.564269	0.0178729	-0.334886	-0.518136	-1.26164	-0.161793	0.0381737	0.0703279	-1.26164	-1.26164
TTHERM_01288990	CPT	L2FC_CPM	0.570589	0.241414	1.02121	0.450507	-0.0160372	-0.00168738	-0.391829	0.021792	1.02121	-0.391829	1.02121
TTHERM_01288990	UV	L2FC_CPM	0.551474	-0.395181	1.26013	-0.0578549	0.305439	0.0358749	0.113229	0.0412582	1.26013	-0.395181	1.26013
TTHERM_00455090	MMS	L2FC_CPM	0.134214	0.533743	0.280485	-0.137937	-0.109388	-0.292413	-0.836164	0.0247828	0.533743	-0.836164	-0.836164
TTHERM_00455090	HP	L2FC_CPM	0.122838	-0.266699	-0.813372	-0.688843	-0.131453	0.309869	-0.353203	0.0289937	0.309869	-0.813372	-0.813372
TTHERM_00455090	HU	L2FC_CPM	-0.267228	-0.436249	-0.205774	-0.396813	-0.329156	-0.60053	-0.346014	0.0141627	-0.205774	-0.60053	-0.60053
TTHERM_00455090	IR	L2FC_CPM	-0.359383	0.284128	0.428109	0.286406	0.279414	-0.146309	-0.261649	0.0249403	0.428109	-0.359383	0.428109
TTHERM_00455090	CPT	L2FC_CPM	0.169557	0.179247	0.0285676	0.0944216	0.0213622	-0.111986	-0.225136	0.00702879	0.179247	-0.225136	-0.225136
TTHERM_00455090	UV	L2FC_CPM	-0.376907	-0.369144	-1.08189	-0.533469	-0.315101	-0.560748	-0.735957	0.023629	-0.315101	-1.08189	-1.08189
TTHERM_00823370	MMS	L2FC_CPM	-0.427299	-1.09839	-0.0424853	-1.52426	-0.500467	0.221292	-0.362928	0.0353999	0.221292	-1.52426	-1.52426
TTHERM_00823370	HP	L2FC_CPM	-0.785706	-0.40745	-0.225151	-0.263832	-0.73474	0.324994	0.0470279	0.0283562	0.324994	-0.785706	-0.785706
TTHERM_00823370	HU	L2FC_CPM	-0.135111	-1.24948	0.54221	-0.49393	-0.0795458	0.0734489	-0.483169	0.0601635	0.54221	-1.24948	-1.24948
TTHERM_00823370	IR	L2FC_CPM	1.31566	-1.83429	-0.525863	-0.144221	0.584907	-0.324772	-0.809515	0.0852368	1.31566	-1.83429	-1.83429
TTHERM_00823370	CPT	L2FC_CPM	-1.98738	-2.71878	-1.4239	-3.1227	-1.88941	-2.35407	-0.22213	0.0547962	-0.22213	-3.1227	-3.1227
TTHERM_00823370	UV	L2FC_CPM	-0.418863	-1.80968	-1.09013	-0.386741	-0.548272	-0.773909	1.43344	0.0835673	1.43344	-1.80968	-1.80968
TTHERM_01080330	MMS	L2FC_CPM	0.164365	3.31251	1.21495	1.33674	0.885252	0.232026	0.586822	0.0488146	3.31251	0.164365	3.31251
TTHERM_01080330	HP	L2FC_CPM	0.130499	1.62055	-0.767633	-0.0838196	-0.958652	-0.0683004	-0.350796	0.0531878	1.62055	-0.958652	1.62055
TTHERM_01080330	HU	L2FC_CPM	-0.231387	-0.886236	0.877772	0.139086	-0.379758	-0.714394	-0.340708	0.0616546	0.877772	-0.886236	-0.886236
TTHERM_01080330	IR	L2FC_CPM	-0.565117	0.548269	0.449993	1.52238	-0.323349	0.267801	-0.315733	0.054928	1.52238	-0.565117	1.52238
TTHERM_01080330	CPT	L2FC_CPM	-0.0259764	0	-0.373473	0.127496	0.48417	0.667227	0.0787394	0.0160576	0.667227	-0.373473	0.667227
TTHERM_01080330	UV	L2FC_CPM	-0.372089	-0.8158	-0.240595	0.224436	-0.0232233	0.906953	0.179247	0.0453304	0.906953	-0.8158	0.906953
TTHERM_00473010	MMS	L2FC_CPM	-0.417138	-0.00867116	0.255676	0.17837	-0.085002	0.585737	0.942784	0.0247607	0.942784	-0.417138	0.942784
TTHERM_00473010	HP	L2FC_CPM	-0.800429	-1.36727	-0.190149	-0.855455	0.0356334	-0.722026	-0.774231	0.0330697	0.0356334	-1.36727	-1.36727
TTHERM_00473010	HU	L2FC_CPM	0.268417	0.851318	1.37363	-1.12097	-0.401803	-0.529408	-0.187026	0.0893318	1.37363	-1.12097	1.37363
TTHERM_00473010	IR	L2FC_CPM	0.615541	1.57526	0.502832	-1.1038	-0.65251	-0.884032	-0.794581	0.0813834	1.57526	-1.1038	1.57526
TTHERM_00473010	CPT	L2FC_CPM	-0.426265	0.838427	0.937493	0.600398	1.11383	0.967415	0.974961	0.0196316	1.11383	-0.426265	1.11383
TTHERM_00473010	UV	L2FC_CPM	0.462172	0.827431	0.376645	-0.0887534	0.142678	0.251913	0.0872104	0.0237289	0.827431	-0.0887534	0.827431
TTHERM_01015860	MMS	L2FC_CPM	-0.0698165	-0.710244	-0.724358	-0.691205	-0.578507	-0.583139	-0.644417	0.0110916	-0.0698165	-0.724358	-0.724358
TTHERM_01015860	HP	L2FC_CPM	-0.643525	-1.54096	-1.13813	-1.23809	-0.604912	-0.0458027	-0.0245131	0.0444715	-0.0245131	-1.54096	-1.54096
TTHERM_01015860	HU	L2FC_CPM	-0.251982	-0.00656294	-0.183482	-0.291944	-0.317276	-0.0843852	0.183713	0.0189993	0.183713	-0.317276	-0.317276
TTHERM_01015860	IR	L2FC_CPM	-0.762077	-0.242561	-0.241668	-0.220216	0.0830245	0.155849	0.424492	0.0309329	0.424492	-0.762077	-0.762077
TTHERM_01015860	CPT	L2FC_CPM	-0.591533	-0.660269	-0.815545	-1.00082	-0.977129	-0.888916	-0.935549	0.00818788	-0.591533	-1.00082	-1.00082
TTHERM_01015860	UV	L2FC_CPM	-1.00278	-1.14382	-0.512798	-0.587211	-0.422083	-0.0325748	0.0332808	0.04107	0.0332808	-1.14382	-1.14382
TTHERM_001075589	MMS	L2FC_CPM	0.550646	0.100528	-0.825295	-1.37917	-1.27352	-2.4398	-1.77488	0.066415	0.550646	-2.4398	-2.4398
TTHERM_001075589	HP	L2FC_CPM	1.3258	1.78084	0.676221	-0.101895	-0.140204	-0.41256	-0.462518	0.0563663	1.78084	-0.462518	1.78084
TTHERM_001075589	HU	L2FC_CPM	1.62275	-0.17898	0.624272	0.050977	-0.43868	-0.342797	-0.971109	0.084035	1.62275	-0.971109	1.62275
TTHERM_001075589	IR	L2FC_CPM	2.0821	-0.918213	-0.00180611	-0.743633	-1.04604	-0.443516	-1.25043	0.0860207	2.0821	-1.25043	2.0821
TTHERM_001075589	CPT	L2FC_CPM	2.44502	2.27541	2.8535	2.44965	2.40293	2.12735	1.56935	0.0146295	2.8535	1.56935	2.8535
TTHERM_001075589	UV	L2FC_CPM	3.20184	0.29215	-0.873078	-0.320845	-0.759005	-1.22865	-0.917033	0.1099	3.20184	-1.22865	3.20184
TTHERM_000694549	MMS	L2FC_CPM	0.58759	0.0695994	-0.398035	-0.392841	-0.548084	0	-0.184519	0.0213768	0.58759	-0.548084	0.58759
TTHERM_000694549	HP	L2FC_CPM	0.135256	0.85104	0.307228	0.327748	-0.225603	0.0621483	0.139306	0.0205037	0.85104	-0.225603	0.85104
TTHERM_000694549	HU	L2FC_CPM	-0.154763	-0.275804	0.689388	0.903746	0.229714	0.453814	0.343688	0.0422678	0.903746	-0.275804	0.903746
TTHERM_000694549	IR	L2FC_CPM	-1.07024	0.268027	1.27772	0.378437	0.209764	-0.226693	0.847009	0.0584852	1.27772	-1.07024	1.27772
TTHERM_000694549	CPT	L2FC_CPM	-0.653363	0.234667	0.383739	0.231409	0.382437	-0.335945	0.0452723	0.0179745	0.383739	-0.653363	-0.653363
TTHERM_000694549	UV	L2FC_CPM	-0.955696	0.0400081	-0.0607628	0.396135	0.267486	0.440527	-0.175906	0.0377604	0.440527	-0.955696	-0.955696
TTHERM_00691090	MMS	L2FC_CPM	0.994718	1.22971	-0.221992	-0.0454726	-0.585893	-0.0212943	0.561429	0.0367043	1.22971	-0.585893	1.22971
TTHERM_00691090	HP	L2FC_CPM	0.798684	0.619987	-0.174757	0.640544	0.223473	-0.820006	-0.102354	0.0378658	0.798684	-0.820006	-0.820006
TTHERM_00691090	HU	L2FC_CPM	2.89427	0.660858	0.104747	0.509557	0.621788	0.324335	0.028477	0.0718358	2.89427	0.028477	2.89427
TTHERM_00691090	IR	L2FC_CPM	-1.58319	-1.16258	-0.947578	-1.09057	-0.711348	-0.844605	-0.974749	0.026407	-0.711348	-1.58319	-1.58319
TTHERM_00691090	CPT	L2FC_CPM	-1.72614	-0.25564	0.534892	0.266514	-0.196689	-1.02924	-1.39169	0.0438575	0.534892	-1.72614	-1.72614
TTHERM_00691090	UV	L2FC_CPM	1.52524	-0.0729376	-0.279112	-0.0877143	-0.453278	-0.708462	-0.565449	0.0544616	1.52524	-0.708462	1.52524
TTHERM_01043060	MMS	L2FC_CPM	0.0164281	0.0785273	-0.0505526	0.573627	0.702079	0.475594	0.984636	0.0212231	0.984636	-0.0505526	0.984636
TTHERM_01043060	HP	L2FC_CPM	0.173561	0.0610928	-0.0511881	0.567369	1.16629	0.383462	1.11054	0.0310089	1.16629	-0.0511881	1.16629
TTHERM_01043060	HU	L2FC_CPM	0.298674	-0.660204	-0.492195	-0.176942	-0.333891	-0.130818	0.199589	0.0382243	0.298674	-0.660204	-0.660204
TTHERM_01043060	IR	L2FC_CPM	0.500123	-0.342199	-0.396614	0.202096	0.0581748	0.163799	0.34751	0.0270081	0.500123	-0.396614	0.500123
TTHERM_01043060	CPT	L2FC_CPM	2.03405	2.72841	1.78363	1.62672	1.86946	1.77343	1.84253	0.0126052	2.72841	1.62672	2.72841
TTHERM_01043060	UV	L2FC_CPM	2.28788	1.75155	-0.0852276	-0.0126823	0.204317	-0.129776	-0.26394	0.0717293	2.28788	-0.26394	2.28788
TTHERM_01085410	MMS	L2FC_CPM	-0.426804	0.460124	1.07348	0.998823	0.401881	1.5514	1.04552	0.0324382	1.5514	-0.426804	1.5514
TTHERM_01085410	HP	L2FC_CPM	-1.27487	-1.56895	-0.0551593	0.465937	0.478433	0.916848	0.943268	0.0669902	0.943268	-1.56895	-1.56895
TTHERM_01085410	HU	L2FC_CPM	-0.702924	-0.521645	0.271405	0.277389	1.15909	1.0018	0.535515	0.0693064	1.15909	-0.702924	1.15909
TTHERM_01085410	IR	L2FC_CPM	2.03678	0.167223	0.369946	0.5315	0.861919	0.158276	-0.403114	0.0543818	2.03678	-0.403114	2.03678
TTHERM_01085410	CPT	L2FC_CPM	-1.66787	-0.328608	0.280092	0.201626	0.294433	-0.499069	0.276323	0.0312621	0.294433	-1.66787	-1.66787
TTHERM_01085410	UV	L2FC_CPM	-1.02021	-0.660659	0.0061953	0.399732	0.711888	-0.659721	0.579283	0.0590903	0.711888	-1.02021	-1.02021
TTHERM_00655270	MMS	L2FC_CPM	-0.0909716	0.296634	0.48506	0.128129	0.159406	0.654258	0.477829	0.0140906	0.654258	-0.0909716	0.654258
TTHERM_00655270	HP	L2FC_CPM	0.0475036	-0.562596	-0.0237766	-0.377627	-0.810111	-0.0528808	0.295719	0.027019	0.295719	-0.810111	-0.810111
TTHERM_00655270	HU	L2FC_CPM	-0.516182	0.278737	0.270288	0.398175	0.429444	0.654297	0.80421	0.0377068	0.80421	-0.516182	0.80421
TTHERM_00655270	IR	L2FC_CPM	0.21169	0.113472	-0.286782	-0.0801879	0.0825725	0.0493544	0.114987	0.012591	0.21169	-0.286782	-0.286782
TTHERM_00655270	CPT	L2FC_CPM	-1.1377	-0.726128	-0.36866	-0.256669	-0.725354	-0.299434	-0.528518	0.0155115	-0.256669	-1.1377	-1.1377
TTHERM_00655270	UV	L2FC_CPM	-0.622462	-1.03494	-0.0740272	-0.0707231	-0.220723	0.159261	-0.0703301	0.033749	0.159261	-1.03494	-1.03494
TTHERM_00444120	MMS	L2FC_CPM	-0.0361046	0.0825573	0.374499	0.31787	0.66449	1.12116	0.988171	0.0237703	1.12116	-0.0361046	1.12116
TTHERM_00444120	HP	L2FC_CPM	-1.2053	-1.11556	-0.703381	-0.159862	-0.042605	0.166727	-0.0780861	0.0392996	0.166727	-1.2053	-1.2053
TTHERM_00444120	HU	L2FC_CPM	-0.01675	0.124715	0.0331562	0.0587624	0.28601	0.208759	0.300914	0.0128918	0.300914	-0.01675	0.300914
TTHERM_00444120	IR	L2FC_CPM	1.00787	0.771896	0.432496	0.109284	0.504085	0.0353655	0.588072	0.0264613	1.00787	0.0353655	1.00787
TTHERM_00444120	CPT	L2FC_CPM	-0.388648	0.382265	0.493684	1.34127	1.29871	1.80685	1.73532	0.0354676	1.80685	-0.388648	1.80685
TTHERM_00444120	UV	L2FC_CPM	-0.00720522	-0.117868	0.529452	0.498622	0.253252	0.123807	0.402783	0.0207247	0.529452	-0.117868	0.529452
TTHERM_002653379	MMS	L2FC_CPM	0.551623	0.142488	-0.22659	-0.373029	0	-0.2177	-0.193773	0.0166933	0.551623	-0.373029	0.551623
TTHERM_002653379	HP	L2FC_CPM	0.27468	-0.112805	0	-0.180108	0	0.172657	-0.648056	0.0194386	0.27468	-0.648056	-0.648056
TTHERM_002653379	HU	L2FC_CPM	0	0.0909764	0.533017	0.0374322	0.539367	-0.0293708	-0.468415	0.0342523	0.539367	-0.468415	0.539367
TTHERM_002653379	IR	L2FC_CPM	-0.451483	1.00148	0.0699591	0.486386	0.292022	0.00957777	-0.634271	0.0450448	1.00148	-0.634271	1.00148
TTHERM_002653379	CPT	L2FC_CPM	0	0	-0.0577611	0.0216305	-0.63099	-0.993983	-1.0679	0.0232705	0.0216305	-1.0679	-1.0679
TTHERM_002653379	UV	L2FC_CPM	0	0	0.497535	-0.0113844	-0.72038	0	-0.00545841	0.02467	0.497535	-0.72038	-0.72038
TTHERM_002653354	MMS	L2FC_CPM	-0.560483	0.431141	-0.261035	0.590146	-0.459329	0.301257	-1.15478	0.0361605	0.590146	-1.15478	-1.15478
TTHERM_002653354	HP	L2FC_CPM	-0.523933	0.341314	-0.205949	0.838252	-0.1931	0.265483	-0.414152	0.0325217	0.838252	-0.523933	0.838252
TTHERM_002653354	HU	L2FC_CPM	0.734491	1.58988	0.16831	0.0231536	0.183849	-0.958962	-0.316127	0.0784602	1.58988	-0.958962	1.58988
TTHERM_002653354	IR	L2FC_CPM	-0.00629147	0.987704	-0.0479542	0.0280949	-0.610416	-0.60027	-1.52296	0.0635582	0.987704	-1.52296	-1.52296
TTHERM_002653354	CPT	L2FC_CPM	1.02412	-0.842504	0.183271	0.149379	-0.413816	-0.0303366	-0.557455	0.0293061	1.02412	-0.842504	1.02412
TTHERM_002653354	UV	L2FC_CPM	0.629905	-0.140923	0.430773	-0.375463	0.127275	1.04616	-0.697028	0.0508394	1.04616	-0.697028	1.04616
TTHERM_00584490	MMS	L2FC_CPM	-0.491854	0.0713746	-0.438726	0.270118	-0.602599	0.206332	-0.764822	0.0242013	0.270118	-0.764822	-0.764822
TTHERM_00584490	HP	L2FC_CPM	-1.11881	-0.0257068	0.372464	-0.0618682	0.399553	0.188691	0.287072	0.030779	0.399553	-1.11881	-1.11881
TTHERM_00584490	HU	L2FC_CPM	-1.68708	0.460584	0.523201	-0.404317	0.276181	0.223925	0.318924	0.0702937	0.523201	-1.68708	-1.68708
TTHERM_00584490	IR	L2FC_CPM	-1.48656	0.521194	0.399073	-0.127653	0.808583	-0.455471	-0.0195473	0.0612586	0.808583	-1.48656	-1.48656
TTHERM_00584490	CPT	L2FC_CPM	-1.03771	-0.96799	-2.03672	-0.70734	-0.997127	-1.29124	-1.36296	0.0217547	-0.70734	-2.03672	-2.03672
TTHERM_00584490	UV	L2FC_CPM	-1.25558	-0.721549	-2.2181	-0.81267	-0.390756	0.190723	0.514658	0.0861342	0.514658	-2.2181	-2.2181
TTHERM_00492300	MMS	L2FC_CPM	0.121592	0.569496	0.607533	0.34767	0.551535	0.108498	0.142196	0.0120212	0.607533	0.108498	0.607533
TTHERM_00492300	HP	L2FC_CPM	0.389868	1.21147	1.27042	0.9547	0.417782	-0.286287	-0.825634	0.0499424	1.27042	-0.825634	1.27042
TTHERM_00492300	HU	L2FC_CPM	0.223885	0.181592	0.404521	0.234679	0.0281698	-0.668652	-0.520236	0.0407386	0.404521	-0.668652	-0.668652
TTHERM_00492300	IR	L2FC_CPM	0.612553	0.455316	0.349089	-0.330878	0.24562	-0.204974	-0.0635835	0.0289076	0.612553	-0.330878	0.612553
TTHERM_00492300	CPT	L2FC_CPM	-0.0975678	2.28648	1.29509	1.0457	1.14251	0.76626	0.852936	0.0295039	2.28648	-0.0975678	2.28648
TTHERM_00492300	UV	L2FC_CPM	-0.0785519	1.95306	1.11017	0.550094	0.974542	0.324832	0.226164	0.0507307	1.95306	-0.0785519	1.95306
TTHERM_000773078	MMS	L2FC_CPM	-0.567078	0.367271	-0.0439956	-0.43376	-0.952052	-1.25264	-1.0779	0.0353419	0.367271	-1.25264	-1.25264
TTHERM_000773078	HP	L2FC_CPM	0.156638	-0.517376	-0.89346	-0.819986	-0.616467	-0.574522	-2.37e-05	0.02797	0.156638	-0.89346	-0.89346
TTHERM_000773078	HU	L2FC_CPM	-0.470157	0.02852	-0.0208985	-0.290137	0.014117	-0.183471	-0.297891	0.0204159	0.02852	-0.470157	-0.470157
TTHERM_000773078	IR	L2FC_CPM	-1.21817	0.171712	0.337287	0.122607	0.455689	-0.518976	-0.227591	0.0472179	0.455689	-1.21817	-1.21817
TTHERM_000773078	CPT	L2FC_CPM	0.0715521	-0.119736	0.250556	0.0816236	0.236791	0.112593	-1.17861	0.0193425	0.250556	-1.17861	-1.17861
TTHERM_000773078	UV	L2FC_CPM	-0.835246	-0.886323	-0.503991	-0.127103	-0.216031	-0.457726	-1.08147	0.0337573	-0.127103	-1.08147	-1.08147
TTHERM_01376880	MMS	L2FC_CPM	-0.09304	-0.573509	-1.65565	-0.652639	-0.415484	-0.0568419	-2.03262	0.0452361	-0.0568419	-2.03262	-2.03262
TTHERM_01376880	HP	L2FC_CPM	-0.00238753	-0.0028755	-0.239661	-0.170108	-1.05689	-0.368862	-0.538167	0.0249165	-0.00238753	-1.05689	-1.05689
TTHERM_01376880	HU	L2FC_CPM	0.27334	-0.100755	0.10446	0.308712	-0.379133	-0.714797	-0.303581	0.0403811	0.308712	-0.714797	-0.714797
TTHERM_01376880	IR	L2FC_CPM	-0.655074	-0.125909	0.511998	0.39826	-1.27541	-0.880581	-0.234891	0.0577794	0.511998	-1.27541	-1.27541
TTHERM_01376880	CPT	L2FC_CPM	0.412802	0.681124	2.02473	1.19037	0.935763	0.824646	0.796608	0.0209131	2.02473	0.412802	2.02473
TTHERM_01376880	UV	L2FC_CPM	-1.98202	-0.817115	-0.565243	-0.925561	-0.55489	-0.610889	-0.214402	0.0483412	-0.214402	-1.98202	-1.98202
TTHERM_01179750	MMS	L2FC_CPM	-0.038495	-0.0882152	-0.415449	2.09809	0.797627	1.21236	0.714211	0.0458327	2.09809	-0.415449	2.09809
TTHERM_01179750	HP	L2FC_CPM	-0.844083	-0.285199	-0.694901	0.485636	-0.519548	0.215828	0.00852654	0.0351143	0.485636	-0.844083	-0.844083
TTHERM_01179750	HU	L2FC_CPM	-0.201107	-0.203831	0.133122	0.348528	-0.0332864	-0.295372	0.0512071	0.0236979	0.348528	-0.295372	0.348528
TTHERM_01179750	IR	L2FC_CPM	-1.07157	-0.851889	0.607381	0.261063	-0.0867511	-0.467028	-0.392015	0.0519431	0.607381	-1.07157	-1.07157
TTHERM_01179750	CPT	L2FC_CPM	0.380393	-1.3509	-0.301531	-0.538406	-0.35944	-1.062	-0.363775	0.0275783	0.380393	-1.3509	-1.3509
TTHERM_01179750	UV	L2FC_CPM	-1.10138	-0.864981	-0.517255	-0.125643	0.176844	-0.705727	-0.602652	0.0401608	0.176844	-1.10138	-1.10138
TTHERM_00529470	MMS	L2FC_CPM	0.342844	0.590707	-0.163125	0.417629	-0.0738631	-1.67694	-0.404783	0.0404864	0.590707	-1.67694	-1.67694
TTHERM_00529470	HP	L2FC_CPM	0.268884	1.87877	2.56106	1.67847	2.02348	-0.771874	1.53088	0.0634636	2.56106	-0.771874	2.56106
TTHERM_00529470	HU	L2FC_CPM	1.26775	1.42346	1.22688	1.63071	2.49041	2.4214	1.1429	0.0419641	2.49041	1.1429	2.49041
TTHERM_00529470	IR	L2FC_CPM	0.487101	-0.742042	-1.58244	-1.25416	-0.319749	-0.777811	-1.14253	0.0625748	0.487101	-1.58244	-1.58244
TTHERM_00529470	CPT	L2FC_CPM	2.87944	-1.34013	0.794703	2.10944	2.25005	2.10249	2.56183	0.0540524	2.87944	-1.34013	2.87944
TTHERM_00529470	UV	L2FC_CPM	1.96717	-2.15776	-0.603244	0.445796	1.22099	1.62488	1.34123	0.108403	1.96717	-2.15776	-2.15776
TTHERM_01697320	MMS	L2FC_CPM	0.294192	-0.844641	-1.19264	-1.58791	-1.72913	-1.08187	-2.00095	0.0467274	0.294192	-2.00095	-2.00095
TTHERM_01697320	HP	L2FC_CPM	-0.798729	1.58048	0.334463	0.722147	-0.715364	0.0519901	-0.828594	0.0603842	1.58048	-0.828594	1.58048
TTHERM_01697320	HU	L2FC_CPM	0.751746	-0.238278	0.83481	0.341639	0.047588	-1.99802	-0.484829	0.0973241	0.83481	-1.99802	-1.99802
TTHERM_01697320	IR	L2FC_CPM	-1.77274	0.67791	-0.709167	-0.49037	-1.31614	-0.222425	-0.694657	0.0705585	0.67791	-1.77274	-1.77274
TTHERM_01697320	CPT	L2FC_CPM	1.47447	0.737418	1.00204	1.50952	0.806645	0.258888	0.690412	0.0195791	1.50952	0.258888	1.50952
TTHERM_01697320	UV	L2FC_CPM	1.09852	0.588284	-0.135775	1.09192	0.612513	0.733226	-0.216837	0.0400909	1.09852	-0.216837	1.09852
TTHERM_001661069	MMS	L2FC_CPM	-0.841438	-0.309163	-0.837222	-1.47568	-0.102705	-0.961238	-1.83591	0.037854	-0.102705	-1.83591	-1.83591
TTHERM_001661069	HP	L2FC_CPM	-0.935027	0.47052	0.114635	-1.50059	-0.372646	0.194617	-0.23073	0.048562	0.47052	-1.50059	-1.50059
TTHERM_001661069	HU	L2FC_CPM	-0.089917	-0.154274	-0.304932	-1.52908	-1.61837	-0.476553	-0.593392	0.0728692	-0.089917	-1.61837	-1.61837
TTHERM_001661069	IR	L2FC_CPM	0.452547	1.21091	1.81481	-0.313739	-0.208108	1.26742	0.932502	0.0586267	1.81481	-0.313739	1.81481
TTHERM_001661069	CPT	L2FC_CPM	0.369726	0.22169	1.84735	1.35783	1.4731	2.71233	2.69761	0.0420664	2.71233	0.22169	2.71233
TTHERM_001661069	UV	L2FC_CPM	-0.365739	0.313285	1.43924	0.738277	0.249889	1.69725	1.58027	0.0587249	1.69725	-0.365739	1.69725
TTHERM_001498868	MMS	L2FC_CPM	0.120833	-0.11182	-1.11384	-2.04426	-2.68069	-1.91907	-1.84778	0.068471	0.120833	-2.68069	-2.68069
TTHERM_001498868	HP	L2FC_CPM	0.11956	-0.100778	-0.247048	-1.33295	-1.42082	-0.213067	-0.41495	0.0419781	0.11956	-1.42082	-1.42082
TTHERM_001498868	HU	L2FC_CPM	0.0958649	0.866333	0.464935	-0.0631838	-0.295834	-0.58901	-0.739848	0.0607879	0.866333	-0.739848	0.866333
TTHERM_001498868	IR	L2FC_CPM	0.383277	-0.354227	-0.750244	-0.355256	-0.499339	-0.196183	-0.784619	0.0327618	0.383277	-0.784619	-0.784619
TTHERM_001498868	CPT	L2FC_CPM	-0.263253	-1.63175	-0.0926664	-0.0114479	0.398684	0.626387	0.995123	0.0386522	0.995123	-1.63175	-1.63175
TTHERM_001498868	UV	L2FC_CPM	-0.867899	-0.386987	0.470937	0.125471	0.288877	0.125619	0.352097	0.0376037	0.470937	-0.867899	-0.867899
TTHERM_00419660	MMS	L2FC_CPM	0.00392876	-0.000931303	0.366124	-0.61607	-0.059685	-1.06819	-1.00631	0.0320922	0.366124	-1.06819	-1.06819
TTHERM_00419660	HP	L2FC_CPM	0.412127	-0.306005	-0.269271	-0.987656	-1.35863	-0.520147	-1.33397	0.0475154	0.412127	-1.35863	-1.35863
TTHERM_00419660	HU	L2FC_CPM	-0.17006	0.278399	-0.186996	-0.0232312	-0.504514	-0.699335	-0.62785	0.0390883	0.278399	-0.699335	-0.699335
TTHERM_00419660	IR	L2FC_CPM	0.224174	-0.192682	-0.469498	-0.434003	-0.869672	-0.660994	-0.532648	0.0300045	0.224174	-0.869672	-0.869672
TTHERM_00419660	CPT	L2FC_CPM	-1.06821	0.325748	-0.201215	-0.243012	-0.231661	-0.659481	-0.699398	0.0221727	0.325748	-1.06821	-1.06821
TTHERM_00419660	UV	L2FC_CPM	-0.0260825	0.0584081	0.174208	-0.0349014	-0.135091	-0.159075	-0.335002	0.0139515	0.174208	-0.335002	-0.335002
TTHERM_001264988	MMS	L2FC_CPM	0	0	0	0	0	0.109602	0	0.00146185	0.109602	0	0.109602
TTHERM_001264988	HP	L2FC_CPM	0	0	0	0	0	0.109602	0.269436	0.0054783	0.269436	0	0.269436
TTHERM_001264988	HU	L2FC_CPM	0	0	0	0	0	0	0	0	0	0	0
TTHERM_001264988	IR	L2FC_CPM	0	0	0	0	0	0	0	0	0	0	0
TTHERM_001264988	CPT	L2FC_CPM	0	0	0	0	0	0.16044	0	0.0018293	0.16044	0	0.16044
TTHERM_001264988	UV	L2FC_CPM	0	0	-0.19909	0	0	0.16044	0	0.00719289	0.16044	-0.19909	-0.19909
TTHERM_01347890	MMS	L2FC_CPM	0.136567	-1.29998	0.280651	-0.648737	0.0842762	0.201479	-0.18628	0.0308169	0.280651	-1.29998	-1.29998
TTHERM_01347890	HP	L2FC_CPM	0.783921	-0.341446	0.287665	-0.455264	0.533623	0.657948	-0.0559455	0.0329858	0.783921	-0.455264	0.783921
TTHERM_01347890	HU	L2FC_CPM	0.583355	0.431379	0.632184	-0.284805	-0.391643	-1.0348	0.42417	0.0625582	0.632184	-1.0348	-1.0348
TTHERM_01347890	IR	L2FC_CPM	0.859861	0.187209	0.27611	-0.10622	-0.909947	-0.634825	0.098568	0.048419	0.859861	-0.909947	-0.909947
TTHERM_01347890	CPT	L2FC_CPM	-0.449744	0.914238	0.242551	0.820326	-0.427529	-0.149541	-0.143472	0.0263009	0.914238	-0.449744	0.914238
TTHERM_01347890	UV	L2FC_CPM	-0.515017	1.21344	0.765239	1.18589	0.0831312	0.969593	1.09762	0.0462784	1.21344	-0.515017	1.21344
TTHERM_01695310	MMS	L2FC_CPM	0.28122	-0.281381	-1.53694	-1.89863	-2.03772	-1.92754	-2.39813	0.0627686	0.28122	-2.39813	-2.39813
TTHERM_01695310	HP	L2FC_CPM	0.719952	-0.539679	-1.04137	-0.845218	-1.6292	-0.591987	-0.623428	0.0487599	0.719952	-1.6292	-1.6292
TTHERM_01695310	HU	L2FC_CPM	0.279219	0.0736056	0.0230545	0.0712427	-0.294084	-0.909462	-0.501856	0.0434769	0.279219	-0.909462	-0.909462
TTHERM_01695310	IR	L2FC_CPM	-0.403627	-0.650545	-0.595021	-0.682514	-0.417571	-0.23998	0.387027	0.0291038	0.387027	-0.682514	-0.682514
TTHERM_01695310	CPT	L2FC_CPM	-0.284971	-0.825051	-0.500694	-0.394427	-1.69292	-1.06707	-0.732575	0.0242216	-0.284971	-1.69292	-1.69292
TTHERM_01695310	UV	L2FC_CPM	-1.35297	-1.10784	-0.497477	-0.0277095	0.018522	0.0548894	0.436585	0.0580542	0.436585	-1.35297	-1.35297
TTHERM_00821780	MMS	L2FC_CPM	-0.0275598	-0.361646	0.434406	0.193752	0.432125	0.620802	0.707115	0.0204877	0.707115	-0.361646	0.707115
TTHERM_00821780	HP	L2FC_CPM	-0.334454	-0.560083	0.171218	-0.334354	0.103669	-0.404028	0.435341	0.0249988	0.435341	-0.560083	-0.560083
TTHERM_00821780	HU	L2FC_CPM	-0.560087	0.560448	-0.0810484	0.151109	0.684542	0.225602	0.285815	0.0409725	0.684542	-0.560087	0.684542
TTHERM_00821780	IR	L2FC_CPM	-0.314317	0.975632	0.140594	0.288957	0.50549	0.00438724	0.339957	0.0315116	0.975632	-0.314317	0.975632
TTHERM_00821780	CPT	L2FC_CPM	-1.1947	-0.0589414	-0.126487	0.113565	-0.299312	0.131947	-0.242692	0.0194377	0.131947	-1.1947	-1.1947
TTHERM_00821780	UV	L2FC_CPM	-1.05712	-1.09069	-0.562356	-0.491198	-0.238375	0.156254	0.14442	0.0464979	0.156254	-1.09069	-1.09069
TTHERM_00499260	MMS	L2FC_CPM	0.0318265	0.562506	0.928645	1.09249	0.449374	0.144997	-0.125931	0.0249281	1.09249	-0.125931	1.09249
TTHERM_00499260	HP	L2FC_CPM	-0.996004	0.103755	-0.694406	0.938132	-0.47341	0.16023	-0.75857	0.0468233	0.938132	-0.996004	-0.996004
TTHERM_00499260	HU	L2FC_CPM	-1.25284	0.737698	0.890933	0.190311	0.502085	-0.0688369	0.579613	0.0664977	0.890933	-1.25284	-1.25284
TTHERM_00499260	IR	L2FC_CPM	1.76163	1.04239	0.337795	0.443786	-0.111873	-0.867744	0.0018852	0.0651581	1.76163	-0.867744	1.76163
TTHERM_00499260	CPT	L2FC_CPM	-3.31792	-1.30875	-0.772812	-0.289224	-0.845085	-0.400801	-0.427898	0.047803	-0.289224	-3.31792	-3.31792
TTHERM_00499260	UV	L2FC_CPM	-2.00383	-0.870782	-0.0262135	-0.492926	-0.971971	-0.71038	0.830132	0.0796532	0.830132	-2.00383	-2.00383
TTHERM_000785819	MMS	L2FC_CPM	0.020728	-1.94888	-1.87463	-0.892395	-1.59889	-0.876703	-1.41203	0.0442733	0.020728	-1.94888	-1.94888
TTHERM_000785819	HP	L2FC_CPM	-0.0997631	-2.56894	-0.307792	-0.410607	0.322523	0.302367	0.812395	0.0681147	0.812395	-2.56894	-2.56894
TTHERM_000785819	HU	L2FC_CPM	-0.925744	-0.326007	-0.794507	-0.0680859	-0.495702	1.10883	0.727301	0.0807386	1.10883	-0.925744	1.10883
TTHERM_000785819	IR	L2FC_CPM	-3.32634	-0.13357	0.721187	0.523901	0.778562	0.616579	0.0514428	0.0963269	0.778562	-3.32634	-3.32634
TTHERM_000785819	CPT	L2FC_CPM	-2.30265	-4.38325	-3.17996	-4.12856	-3.76891	-3.01963	-3.2715	0.0507305	-2.30265	-4.38325	-4.38325
TTHERM_000785819	UV	L2FC_CPM	-2.27095	-2.08361	-0.585409	-1.19064	-0.733534	-0.120083	0.431519	0.0994052	0.431519	-2.27095	-2.27095
TTHERM_00563840	MMS	L2FC_CPM	-0.473765	-0.374161	0.634643	0.598993	0.0936474	0.9958	0.122014	0.0301205	0.9958	-0.473765	0.9958
TTHERM_00563840	HP	L2FC_CPM	-1.13311	-0.211538	0.503829	-0.167766	0.108917	0.0131705	-0.206749	0.0316415	0.503829	-1.13311	-1.13311
TTHERM_00563840	HU	L2FC_CPM	0.358685	-0.77282	0.359155	0.0981378	-0.209529	-0.0255707	0.215623	0.0393262	0.359155	-0.77282	-0.77282
TTHERM_00563840	IR	L2FC_CPM	0.785354	0.563616	0.573781	0.361223	0.252831	-0.265337	0.345311	0.0245693	0.785354	-0.265337	0.785354
TTHERM_00563840	CPT	L2FC_CPM	0.144015	1.47849	1.03252	0.717143	0.656016	0.983555	1.58257	0.021972	1.58257	0.144015	1.58257
TTHERM_00563840	UV	L2FC_CPM	0.170641	0.606759	0.462809	-0.252591	0.146948	0.311347	1.11209	0.0333616	1.11209	-0.252591	1.11209
TTHERM_01627910	MMS	L2FC_CPM	0.217412	0.622406	-0.237737	0	-1.00181	0.078778	-0.477598	0.02967	0.622406	-1.00181	-1.00181
TTHERM_01627910	HP	L2FC_CPM	0.333657	0.853766	-0.427273	0	-0.510519	-0.0183225	0.151778	0.0308401	0.853766	-0.510519	0.853766
TTHERM_01627910	HU	L2FC_CPM	0.304841	-0.18836	0.212666	0.0544301	0.0322399	-0.246075	1.05762	0.0404305	1.05762	-0.246075	1.05762
TTHERM_01627910	IR	L2FC_CPM	0.871762	0.171838	0.399073	0.345359	-0.0618672	0.14507	1.00534	0.029731	1.00534	-0.0618672	1.00534
TTHERM_01627910	CPT	L2FC_CPM	0.981639	0.379772	-0.309354	0.379004	0.991795	1.32491	1.28072	0.026122	1.32491	-0.309354	1.32491
TTHERM_01627910	UV	L2FC_CPM	0.112202	0.320864	-0.00496986	-0.86512	-0.282	0.302392	0.322649	0.0338972	0.322649	-0.86512	-0.86512
TTHERM_000931898	MMS	L2FC_CPM	0.231773	-1.34746	-0.780782	-0.487712	-0.150729	-0.365796	-0.139381	0.0297217	0.231773	-1.34746	-1.34746
TTHERM_000931898	HP	L2FC_CPM	-0.157154	0.424334	0.361873	0.642466	1.0833	0.682176	0.797113	0.0242905	1.0833	-0.157154	1.0833
TTHERM_000931898	HU	L2FC_CPM	0.256138	-0.542397	-0.72199	-0.540697	-0.558444	-0.290016	-0.282026	0.0334124	0.256138	-0.72199	-0.72199
TTHERM_000931898	IR	L2FC_CPM	-0.907748	0.616325	0.985391	0.857599	0.769074	0.870776	0.513009	0.0397115	0.985391	-0.907748	0.985391
TTHERM_000931898	CPT	L2FC_CPM	0.348851	-0.357069	-0.478433	-0.166275	-0.126246	-0.099813	-0.0952946	0.0118538	0.348851	-0.478433	-0.478433
TTHERM_000931898	UV	L2FC_CPM	-0.69184	0.34037	0.562773	0.867469	0.94677	0.924464	1.40903	0.0476407	1.40903	-0.69184	1.40903
TTHERM_01027460	MMS	L2FC_CPM	-0.153961	-0.455023	0.81095	0.0506366	0.25656	0.180568	-0.30477	0.0232643	0.81095	-0.455023	0.81095
TTHERM_01027460	HP	L2FC_CPM	-0.0644141	0.228042	0.853553	-0.0312254	-0.00144365	0.382167	0.131062	0.0198989	0.853553	-0.0644141	0.853553
TTHERM_01027460	HU	L2FC_CPM	0.210046	0.168061	-0.0245565	-0.152992	-0.237447	-0.500062	-0.101871	0.0257824	0.210046	-0.500062	-0.500062
TTHERM_01027460	IR	L2FC_CPM	-0.0675152	-0.678662	-0.958747	-0.43696	-0.36295	0.0772822	0.297309	0.0385133	0.297309	-0.958747	-0.958747
TTHERM_01027460	CPT	L2FC_CPM	0.654508	-0.55273	-0.562803	-1.02185	-1.16676	-0.804119	0.027178	0.0311827	0.654508	-1.16676	-1.16676
TTHERM_01027460	UV	L2FC_CPM	0.637723	-0.651062	-0.42998	-0.721942	-0.802025	-0.388416	-0.130046	0.0407792	0.637723	-0.802025	-0.802025
TTHERM_01638940	MMS	L2FC_CPM	-0.22279	0.329573	0.207515	0.0804158	-0.117763	-0.41431	-0.618084	0.0197832	0.329573	-0.618084	-0.618084
TTHERM_01638940	HP	L2FC_CPM	0.556584	0.964773	1.07516	0.413653	-0.449505	1.00173	-0.959087	0.0489201	1.07516	-0.959087	1.07516
TTHERM_01638940	HU	L2FC_CPM	-0.468466	0.534448	-0.288941	-0.290485	0.135086	0.0471013	0.0103325	0.0349145	0.534448	-0.468466	0.534448
TTHERM_01638940	IR	L2FC_CPM	-0.303977	1.27268	-0.846854	-0.563739	0.850942	0.74905	0.661738	0.0638009	1.27268	-0.846854	1.27268
TTHERM_01638940	CPT	L2FC_CPM	0.297398	1.56152	1.9947	1.76078	2.14651	1.93901	2.54457	0.0266702	2.54457	0.297398	2.54457
TTHERM_01638940	UV	L2FC_CPM	0.142415	1.36888	0.945855	0.804036	0.486922	0.518692	0.841691	0.029293	1.36888	0.142415	1.36888
TTHERM_002653478	MMS	L2FC_CPM	-0.509674	0.0685661	-0.00805761	0.278282	0.293346	0.40235	-0.239194	0.0181231	0.40235	-0.509674	-0.509674
TTHERM_002653478	HP	L2FC_CPM	-0.529048	0.194718	0.274158	0.0409625	0.274997	0.134737	-0.130145	0.0180314	0.274997	-0.529048	-0.529048
TTHERM_002653478	HU	L2FC_CPM	0.700703	-0.121891	-0.386175	-0.143651	-0.717459	0.20164	-0.0242081	0.046408	0.700703	-0.717459	-0.717459
TTHERM_002653478	IR	L2FC_CPM	0.679527	-0.976385	-0.304279	-0.419322	-0.777828	0.325133	-0.376721	0.0493577	0.679527	-0.976385	-0.976385
TTHERM_002653478	CPT	L2FC_CPM	0.515258	0.0982904	-0.0185985	0.460625	-0.23269	-0.133019	-0.321654	0.0156481	0.515258	-0.321654	0.515258
TTHERM_002653478	UV	L2FC_CPM	0.508443	-0.333452	0.411884	-0.442989	-0.921283	0.836598	0.186725	0.0524805	0.836598	-0.921283	-0.921283
TTHERM_001443819	MMS	L2FC_CPM	-0.502522	0.741674	0.0806382	-0.340985	0.198359	0.124178	-0.0614568	0.0221711	0.741674	-0.502522	0.741674
TTHERM_001443819	HP	L2FC_CPM	-0.546487	1.20459	0.675783	-0.352522	0.394177	-0.173317	-0.0810871	0.0414253	1.20459	-0.546487	1.20459
TTHERM_001443819	HU	L2FC_CPM	0.21577	0.339939	0.316425	0.614066	-0.960707	-0.294568	0.160386	0.0501294	0.614066	-0.960707	-0.960707
TTHERM_001443819	IR	L2FC_CPM	0.0442713	0.0957695	1.25283	-0.769346	-0.385794	-0.408496	0.75862	0.056864	1.25283	-0.769346	1.25283
TTHERM_001443819	CPT	L2FC_CPM	0.223437	-1.21717	-0.266894	-0.310066	0.654184	0.272985	-0.348022	0.0285217	0.654184	-1.21717	-1.21717
TTHERM_001443819	UV	L2FC_CPM	0.409239	-1.2615	-1.07086	-0.726372	0.649755	-0.140247	0.397506	0.0681848	0.649755	-1.2615	-1.2615
TTHERM_001230029	MMS	L2FC_CPM	-0.311765	0.647382	0.572317	0.281528	0.274092	-0.0287648	-0.697164	0.0269111	0.647382	-0.697164	-0.697164
TTHERM_001230029	HP	L2FC_CPM	-0.163128	0.544208	0.807228	0.189146	0.291721	0.211132	-0.135707	0.0227382	0.807228	-0.163128	0.807228
TTHERM_001230029	HU	L2FC_CPM	0.353665	0.171374	0.151858	0.0630448	-0.559653	0.934865	1.55757	0.0635041	1.55757	-0.559653	1.55757
TTHERM_001230029	IR	L2FC_CPM	0.0391721	-0.802256	0.563544	-0.960222	0.148853	0.697564	1.06925	0.0613072	1.06925	-0.960222	1.06925
TTHERM_001230029	CPT	L2FC_CPM	0.333205	0.409244	0.772261	-0.270691	0.457915	-0.633019	0.17411	0.0221357	0.772261	-0.633019	0.772261
TTHERM_001230029	UV	L2FC_CPM	0.590909	0.0278861	0.320931	-0.225796	0.462741	0.531872	0.678739	0.0255649	0.678739	-0.225796	0.678739
TTHERM_00721140	MMS	L2FC_CPM	-0.182335	0.599042	0.579908	0.530051	0.101526	-0.814418	-0.309393	0.0297446	0.599042	-0.814418	-0.814418
TTHERM_00721140	HP	L2FC_CPM	0.259797	1.43099	0.591	0.810518	0.596602	-0.256661	-0.56801	0.0431479	1.43099	-0.56801	1.43099
TTHERM_00721140	HU	L2FC_CPM	0.937642	0.519024	1.38538	0.664678	0.215397	0.616197	-0.12854	0.045076	1.38538	-0.12854	1.38538
TTHERM_00721140	IR	L2FC_CPM	1.40007	-0.338209	0.938268	-0.202976	-0.463701	0.00257605	-0.822812	0.0629297	1.40007	-0.822812	1.40007
TTHERM_00721140	CPT	L2FC_CPM	1.09655	0.991285	1.29611	0.89322	0.512028	0.0349568	-0.17078	0.0251148	1.29611	-0.17078	1.29611
TTHERM_00721140	UV	L2FC_CPM	0.853839	0.977524	0.351163	0.128192	-0.327677	-0.890699	-0.228994	0.0558284	0.977524	-0.890699	0.977524
TTHERM_01326800	MMS	L2FC_CPM	0	0	0	0	0	0.0707336	0	0.000944005	0.0707336	0	0.0707336
TTHERM_01326800	HP	L2FC_CPM	0	0.338571	0.0473049	0.0254157	0.432218	-0.166349	0	0.0133621	0.432218	-0.166349	0.432218
TTHERM_01326800	HU	L2FC_CPM	0.518389	-0.183863	-0.432606	0	0	0	-0.156498	0.0280477	0.518389	-0.432606	0.518389
TTHERM_01326800	IR	L2FC_CPM	0.0880107	0	0	0	0	0	0.21788	0.0053452	0.21788	0	0.21788
TTHERM_01326800	CPT	L2FC_CPM	0	0	-0.391846	0	0	0	0.437147	0.00946645	0.437147	-0.391846	0.437147
TTHERM_01326800	UV	L2FC_CPM	0	0	0	0	0	0	0.294517	0.00584674	0.294517	0	0.294517
TTHERM_002653469	MMS	L2FC_CPM	-0.62528	0.616023	-0.194593	0.513129	-0.0480552	0.284948	-0.168704	0.024763	0.616023	-0.62528	-0.62528
TTHERM_002653469	HP	L2FC_CPM	0	0.616023	0.907931	0.339395	0	0.669521	-0.380145	0.0300322	0.907931	-0.380145	0.907931
TTHERM_002653469	HU	L2FC_CPM	0.378829	-0.53762	1.17809	1.27238	0.0395786	-0.684797	1.22448	0.0802006	1.27238	-0.684797	1.27238
TTHERM_002653469	IR	L2FC_CPM	0.730794	-0.601863	0.233755	0.644027	0.0905711	-0.59925	1.89301	0.0658292	1.89301	-0.601863	1.89301
TTHERM_002653469	CPT	L2FC_CPM	0.424302	-0.38805	-0.388218	0.0897036	0.32195	-0.858134	-0.744738	0.0251156	0.424302	-0.858134	-0.858134
TTHERM_002653469	UV	L2FC_CPM	-0.408964	-0.29912	-0.939334	-1.04861	-0.670673	-0.469059	0.219697	0.0389071	0.219697	-1.04861	-1.04861
TTHERM_001285839	MMS	L2FC_CPM	0	0	-0.3505	0.169469	0.0870067	-0.248524	0.149181	0.0109099	0.169469	-0.3505	-0.3505
TTHERM_001285839	HP	L2FC_CPM	0.213677	-0.059558	-0.11559	-0.0600412	-0.35259	-0.106337	0.149181	0.012293	0.213677	-0.35259	-0.35259
TTHERM_001285839	HU	L2FC_CPM	-0.474808	-0.532126	0.453225	-0.202797	-0.258181	-0.0594151	0	0.0349191	0.453225	-0.532126	-0.532126
TTHERM_001285839	IR	L2FC_CPM	-0.551685	-0.994792	0.0466894	-0.224096	0	-0.144389	-1.07771	0.0401161	0.0466894	-1.07771	-1.07771
TTHERM_001285839	CPT	L2FC_CPM	0	0.0653466	0.641621	0	0.501538	-0.696156	0.364428	0.0202572	0.641621	-0.696156	-0.696156
TTHERM_001285839	UV	L2FC_CPM	-0.277276	-0.199275	0.157918	-0.450232	0.0216145	-0.200966	0.116413	0.0192586	0.157918	-0.450232	-0.450232
TTHERM_002653488	MMS	L2FC_CPM	0.211834	0.25142	-0.22659	0.307311	0.00087579	0.0322998	-0.182792	0.0118674	0.307311	-0.22659	0.307311
TTHERM_002653488	HP	L2FC_CPM	0.185778	0.25142	0.342792	-0.0641039	0	-0.336012	0.149181	0.0151699	0.342792	-0.336012	0.342792
TTHERM_002653488	HU	L2FC_CPM	-0.30363	0.799456	-0.7325	0.565331	0.46457	-0.418188	-0.171828	0.0600852	0.799456	-0.7325	0.799456
TTHERM_002653488	IR	L2FC_CPM	-0.667939	1.13658	-0.298057	0.582056	-0.704937	-0.892343	-0.369366	0.0602458	1.13658	-0.892343	1.13658
TTHERM_002653488	CPT	L2FC_CPM	0	0.0400274	-0.918891	0.303231	-0.444839	-0.0200249	0.282118	0.0199318	0.303231	-0.918891	-0.918891
TTHERM_002653488	UV	L2FC_CPM	0	0.0507251	0	0.260394	-0.962764	0.436405	0.351543	0.0342775	0.436405	-0.962764	-0.962764
TTHERM_00636850	MMS	L2FC_CPM	1.27006	1.12378	1.38262	0.547958	-0.0981189	0.722027	0.235266	0.0292054	1.38262	-0.0981189	1.38262
TTHERM_00636850	HP	L2FC_CPM	1.32432	1.12864	0.00644419	0.44475	-0.392928	0.0592766	-0.189855	0.042284	1.32432	-0.392928	1.32432
TTHERM_00636850	HU	L2FC_CPM	0.157683	0.763226	0.337647	0.129033	0.448331	-0.158051	0.739929	0.0329545	0.763226	-0.158051	0.763226
TTHERM_00636850	IR	L2FC_CPM	1.12235	1.0089	0.35293	-1.19591	-0.191329	-0.49429	0.213884	0.0669121	1.12235	-1.19591	-1.19591
TTHERM_00636850	CPT	L2FC_CPM	0.105802	1.38753	0.651186	1.39452	0.0665767	1.23019	1.20477	0.0251192	1.39452	0.0665767	1.39452
TTHERM_00636850	UV	L2FC_CPM	1.29741	1.35555	0.576926	0.383031	-0.324094	0.201995	-0.322442	0.05369	1.35555	-0.324094	1.35555
TTHERM_002653453	MMS	L2FC_CPM	0	0	0	0	0	0.109602	0	0.00146185	0.109602	0	0.109602
TTHERM_002653453	HP	L2FC_CPM	0	0.588571	0	0	0.285978	0.109602	-0.126804	0.0149427	0.588571	-0.126804	0.588571
TTHERM_002653453	HU	L2FC_CPM	0	0	0	0	0	0	0	0	0	0	0
TTHERM_002653453	IR	L2FC_CPM	0	0	0	0	0	0	0	0	0	0	0
TTHERM_002653453	CPT	L2FC_CPM	0	0	0	0	0	0	0	0	0	0	0
TTHERM_002653453	UV	L2FC_CPM	0	0	0	0	0	0	0	0	0	0	0
TTHERM_01000150	MMS	L2FC_CPM	-0.45981	-1.65974	-2.10369	-2.21917	-2.6543	-1.5365	-1.77306	0.0463385	-0.45981	-2.6543	-2.6543
TTHERM_01000150	HP	L2FC_CPM	-1.00285	-2.67886	-1.18437	-1.4486	-0.400215	0.12152	0.358009	0.0792836	0.358009	-2.67886	-2.67886
TTHERM_01000150	HU	L2FC_CPM	-0.929713	-0.354437	-0.708767	-0.260181	-0.339506	0.367355	0.459368	0.0557136	0.459368	-0.929713	-0.929713
TTHERM_01000150	IR	L2FC_CPM	-4.48904	0.0469607	0.330031	0.257053	0.607399	0.238784	0.220149	0.110069	0.607399	-4.48904	-4.48904
TTHERM_01000150	CPT	L2FC_CPM	-2.00887	-5.67392	-5.53446	-5.80438	-5.70321	-4.62415	-4.43986	0.103697	-2.00887	-5.80438	-5.80438
TTHERM_01000150	UV	L2FC_CPM	-2.5314	-1.87753	-1.0044	-0.898271	-1.21385	-0.215201	0.62009	0.104619	0.62009	-2.5314	-2.5314
TTHERM_01413110	MMS	L2FC_CPM	0.294678	-0.0113873	-0.22659	0	-0.231651	-0.540125	0.149181	0.0156931	0.294678	-0.540125	-0.540125
TTHERM_01413110	HP	L2FC_CPM	0.294678	-0.0113873	0	0.238462	-0.101928	0	0.149181	0.00976859	0.294678	-0.101928	0.294678
TTHERM_01413110	HU	L2FC_CPM	-0.905306	-0.46819	0	0.761179	-0.516133	0.204874	0	0.0585227	0.761179	-0.905306	-0.905306
TTHERM_01413110	IR	L2FC_CPM	0	0	0	0.761179	0	0.204874	-0.0639143	0.0183406	0.761179	-0.0639143	0.761179
TTHERM_01413110	CPT	L2FC_CPM	0.832802	0	0.476918	-0.528142	0	-1.20041	-0.754553	0.035174	0.832802	-1.20041	-1.20041
TTHERM_01413110	UV	L2FC_CPM	0.832802	0	0.868764	0	-0.459447	0	-0.416895	0.0423859	0.868764	-0.459447	0.868764
TTHERM_00774810	MMS	L2FC_CPM	-0.207469	-1.13123	-1.3806	-1.04532	-0.606378	-0.43063	-1.05927	0.0263372	-0.207469	-1.3806	-1.3806
TTHERM_00774810	HP	L2FC_CPM	0.0366496	-1.15768	-0.871374	-0.866928	-0.512017	0.177583	-0.352061	0.0364547	0.177583	-1.15768	-1.15768
TTHERM_00774810	HU	L2FC_CPM	-0.329737	-0.235348	0.0531754	-0.212174	-0.0596482	-0.220658	0.200466	0.0196534	0.200466	-0.329737	-0.329737
TTHERM_00774810	IR	L2FC_CPM	-0.0784773	-0.362353	-0.486215	-0.0863759	0.118897	0.232558	0.481934	0.0280073	0.481934	-0.486215	-0.486215
TTHERM_00774810	CPT	L2FC_CPM	-0.148615	0.52025	0.261536	-0.130681	-0.348613	-0.104961	-0.409458	0.0155115	0.52025	-0.409458	0.52025
TTHERM_00774810	UV	L2FC_CPM	-0.261503	-1.29619	-0.827602	-0.585675	-0.685405	-0.154933	-0.439101	0.0355168	-0.154933	-1.29619	-1.29619
TTHERM_00303110	MMS	L2FC_CPM	0.698777	0.526206	-0.179903	-0.461904	0.0612386	0.217486	-0.365016	0.0250216	0.698777	-0.461904	0.698777
TTHERM_00303110	HP	L2FC_CPM	0.763433	0.821161	0.423429	0.319613	-0.00967699	0.776545	0.281509	0.0198253	0.821161	-0.00967699	0.821161
TTHERM_00303110	HU	L2FC_CPM	0.0817579	-0.226638	1.28656	0.827986	-1.16305	-0.266202	-0.368311	0.0827658	1.28656	-1.16305	1.28656
TTHERM_00303110	IR	L2FC_CPM	-0.339741	-0.609327	0.850486	0.937988	-0.402438	-0.195111	0.218895	0.0494769	0.937988	-0.609327	0.937988
TTHERM_00303110	CPT	L2FC_CPM	1.03572	0.10856	0.650159	0.831353	-0.207045	0.730566	0.132496	0.0210622	1.03572	-0.207045	1.03572
TTHERM_00303110	UV	L2FC_CPM	0.746143	-0.125506	0.537511	-0.209968	0.442664	-0.158711	-0.048079	0.0313097	0.746143	-0.209968	0.746143
TTHERM_01514310	MMS	L2FC_CPM	0.188671	0.123784	0.211995	0.195401	0.715945	0.950928	1.2949	0.0234111	1.2949	0.123784	1.2949
TTHERM_01514310	HP	L2FC_CPM	-0.879128	1.01109	-0.00617929	-0.444323	0.989527	0.441362	0.998867	0.0493368	1.01109	-0.879128	1.01109
TTHERM_01514310	HU	L2FC_CPM	0.275124	0.514471	0.140815	-0.57687	-0.612014	-0.243217	-0.00974943	0.0457489	0.514471	-0.612014	-0.612014
TTHERM_01514310	IR	L2FC_CPM	0.211504	0.164329	-0.776495	-0.747936	-0.500901	-0.488423	-0.303522	0.0342438	0.211504	-0.776495	-0.776495
TTHERM_01514310	CPT	L2FC_CPM	1.23323	0.839247	0.438088	0.575168	0.814121	0.955949	-0.147372	0.0195015	1.23323	-0.147372	1.23323
TTHERM_01514310	UV	L2FC_CPM	0.49954	0.979458	0.903128	0.911508	0.900115	1.04843	0.353971	0.0180027	1.04843	0.353971	1.04843
TTHERM_000408698	MMS	L2FC_CPM	-0.264629	-1.00814	-1.6904	-1.02696	-1.7026	-1.04844	-0.694879	0.0319638	-0.264629	-1.7026	-1.7026
TTHERM_000408698	HP	L2FC_CPM	-0.415719	-0.858655	-0.694972	-0.603894	-0.737381	-0.0266053	0.5809	0.0340879	0.5809	-0.858655	-0.858655
TTHERM_000408698	HU	L2FC_CPM	-0.241148	-0.274059	-0.265099	-0.516914	-0.286299	-0.106265	-0.223635	0.0121304	-0.106265	-0.516914	-0.516914
TTHERM_000408698	IR	L2FC_CPM	-0.970296	-0.506002	-0.624931	0.0514088	0.214922	0.267557	0.219845	0.0409829	0.267557	-0.970296	-0.970296
TTHERM_000408698	CPT	L2FC_CPM	-0.531732	-0.930525	-1.02652	-1.00293	-0.872182	-0.614232	-0.280839	0.014318	-0.280839	-1.02652	-1.02652
TTHERM_000408698	UV	L2FC_CPM	-0.657542	-1.85856	-1.27538	-0.792217	-0.608324	-0.0719733	0.0818127	0.06375	0.0818127	-1.85856	-1.85856
TTHERM_01495760	MMS	L2FC_CPM	0	0	0	0	0	0	0	0	0	0	0
TTHERM_01495760	HP	L2FC_CPM	0	0	0	0	0	0	0	0	0	0	0
TTHERM_01495760	HU	L2FC_CPM	0.786823	-0.393436	0.577613	0.516694	-0.508181	0.524734	-0.00887828	0.0502687	0.786823	-0.508181	0.786823
TTHERM_01495760	IR	L2FC_CPM	0.715744	0.551392	0.30637	0.516694	-1.00802	0.454874	0.46788	0.0355116	0.715744	-1.00802	-1.00802
TTHERM_01495760	CPT	L2FC_CPM	0	0	0	0	0	-0.489726	0	0.00563243	0	-0.489726	-0.489726
TTHERM_01495760	UV	L2FC_CPM	-0.290439	0	-0.48813	0	0	-0.0635114	-0.416895	0.0177691	0	-0.48813	-0.48813
TTHERM_00470400	MMS	L2FC_CPM	-0.545072	0.913391	0.548691	0.392586	-0.262625	0.37541	0.965379	0.0302995	0.965379	-0.545072	0.965379
TTHERM_00470400	HP	L2FC_CPM	-1.45442	0.0147193	0.0521425	-1.57391	-0.669643	-1.09425	-1.30311	0.0511699	0.0521425	-1.57391	-1.57391
TTHERM_00470400	HU	L2FC_CPM	-0.273631	0.0799447	0.376504	0.172913	0.109493	0.535024	0.309817	0.025574	0.535024	-0.273631	0.535024
TTHERM_00470400	IR	L2FC_CPM	1.67146	-0.246954	-0.91463	-0.610874	-0.788095	-0.55923	-0.509387	0.060709	1.67146	-0.91463	1.67146
TTHERM_00470400	CPT	L2FC_CPM	-1.24431	-0.339982	-0.986488	-0.677654	-0.693013	-0.967377	-0.663781	0.0150096	-0.339982	-1.24431	-1.24431
TTHERM_00470400	UV	L2FC_CPM	-0.692976	-0.963846	-0.969487	-0.697812	-0.221059	-0.0465121	-0.155584	0.0354977	-0.0465121	-0.969487	-0.969487
TTHERM_01351030	MMS	L2FC_CPM	-0.409701	1.36635	1.06434	0.517244	0.157711	0.446032	0.198107	0.0315816	1.36635	-0.409701	1.36635
TTHERM_01351030	HP	L2FC_CPM	-0.64608	-0.569109	-0.179683	-1.11085	-0.173492	-0.157135	-0.165909	0.0239981	-0.157135	-1.11085	-1.11085
TTHERM_01351030	HU	L2FC_CPM	-1.00203	1.32133	-0.324479	-0.0797822	0.402589	0.313826	0.490844	0.0725323	1.32133	-1.00203	1.32133
TTHERM_01351030	IR	L2FC_CPM	1.04297	0.715104	-0.0431284	0.442498	0.733894	0.654943	0.985513	0.0260182	1.04297	-0.0431284	1.04297
TTHERM_01351030	CPT	L2FC_CPM	-1.95105	-3.52311	-3.28195	-2.38451	-1.69852	-2.24326	-2.90807	0.0440924	-1.69852	-3.52311	-3.52311
TTHERM_01351030	UV	L2FC_CPM	-1.24779	-0.408366	0.0139333	0.258998	0.263365	0.239855	0.0384246	0.0414165	0.263365	-1.24779	-1.24779
TTHERM_01625900	MMS	L2FC_CPM	0.644319	-0.14501	-0.305593	-0.0241209	-0.568445	-0.363145	-0.60421	0.0229905	0.644319	-0.60421	0.644319
TTHERM_01625900	HP	L2FC_CPM	0.34968	0.502557	0.183734	-0.515416	-0.177543	-0.130757	0.581793	0.0271529	0.581793	-0.515416	0.581793
TTHERM_01625900	HU	L2FC_CPM	0.455774	-0.228943	0.00696956	0.858599	0.729714	0.0150919	0.291047	0.0399909	0.858599	-0.228943	0.858599
TTHERM_01625900	IR	L2FC_CPM	0.909516	0.808942	0.253962	0.539734	0.780485	-0.0579114	-0.904068	0.0474483	0.909516	-0.904068	0.909516
TTHERM_01625900	CPT	L2FC_CPM	0.340909	0.742698	-0.552591	-0.888175	1.31851	-0.0739864	-0.981111	0.0421545	1.31851	-0.981111	1.31851
TTHERM_01625900	UV	L2FC_CPM	0.05047	0.867129	-0.0554118	-0.809714	2.15418	0.0500747	-0.0237414	0.0684659	2.15418	-0.809714	2.15418
TTHERM_01370770	MMS	L2FC_CPM	0.304802	0.166022	-0.160668	-0.159553	-0.379498	0.409164	-0.60715	0.0212702	0.409164	-0.60715	-0.60715
TTHERM_01370770	HP	L2FC_CPM	0.212819	0.240961	0.279647	0.377959	-0.594183	0.71045	-0.0526426	0.0254374	0.71045	-0.594183	0.71045
TTHERM_01370770	HU	L2FC_CPM	-0.48237	0.285138	0.105177	0.14215	1.20644	0.165813	-0.383034	0.0517328	1.20644	-0.48237	1.20644
TTHERM_01370770	IR	L2FC_CPM	-0.506913	1.17055	0.909368	-0.279524	1.60244	0.230826	0.057931	0.0609809	1.60244	-0.506913	1.60244
TTHERM_01370770	CPT	L2FC_CPM	-0.235252	0.606024	0.737214	0.68088	-0.239532	0.523197	-0.112335	0.0203434	0.737214	-0.239532	0.737214
TTHERM_01370770	UV	L2FC_CPM	-0.284085	0.424135	-0.673642	0.295737	-0.50427	0.518278	-0.263581	0.0405198	0.518278	-0.673642	-0.673642
TTHERM_000664068	MMS	L2FC_CPM	0.138577	-0.877478	-0.872345	-1.01233	-0.80069	-0.921868	-1.13881	0.0209648	0.138577	-1.13881	-1.13881
TTHERM_000664068	HP	L2FC_CPM	0.158023	-0.206908	-0.0433272	-0.0511574	0.0206908	0.489819	0.424873	0.0171613	0.489819	-0.206908	0.489819
TTHERM_000664068	HU	L2FC_CPM	0.225425	-0.836459	-0.773294	-0.607515	-0.83262	-0.139223	-0.605426	0.0435656	0.225425	-0.836459	-0.836459
TTHERM_000664068	IR	L2FC_CPM	-0.436212	0.514515	0.957142	0.606383	0.392973	1.05974	0.695186	0.0346268	1.05974	-0.436212	1.05974
TTHERM_000664068	CPT	L2FC_CPM	-0.036961	-0.852262	-0.645255	-0.580616	-0.506046	-0.775928	-0.150872	0.0153324	-0.036961	-0.852262	-0.852262
TTHERM_000664068	UV	L2FC_CPM	-0.832379	-0.906897	-0.088489	0.264218	-0.523273	-0.573173	0.0108649	0.0403685	0.264218	-0.906897	-0.906897
TTHERM_001006349	MMS	L2FC_CPM	0.176461	0.32452	-0.23623	0.558118	0.0239124	-0.958058	-0.537275	0.0300751	0.558118	-0.958058	-0.958058
TTHERM_001006349	HP	L2FC_CPM	0.705835	0.841789	0.253843	-0.403043	-0.0255948	0.0617385	0.519902	0.0292919	0.841789	-0.403043	0.841789
TTHERM_001006349	HU	L2FC_CPM	-0.675985	1.34165	0.0189325	1.02079	-0.656366	-0.451463	-0.764551	0.0860488	1.34165	-0.764551	1.34165
TTHERM_001006349	IR	L2FC_CPM	0.751621	1.69314	-0.521383	0.22648	-0.159947	0.144664	0.534206	0.0541712	1.69314	-0.521383	1.69314
TTHERM_001006349	CPT	L2FC_CPM	0.057275	-0.197712	0.765677	1.04425	1.06008	1.07502	0.631362	0.0224274	1.07502	-0.197712	1.07502
TTHERM_001006349	UV	L2FC_CPM	-0.124778	-0.239945	-0.437412	-0.190838	0.426844	0.174948	0.987113	0.0392509	0.987113	-0.437412	0.987113
TTHERM_01184150	MMS	L2FC_CPM	0.0545768	0.418884	0	-0.0284431	0.576251	0	-0.0456936	0.0123492	0.576251	-0.0456936	0.576251
TTHERM_01184150	HP	L2FC_CPM	0.232095	0.388615	0	-0.102616	0.325589	0.137571	-0.370675	0.017871	0.388615	-0.370675	0.388615
TTHERM_01184150	HU	L2FC_CPM	-0.240316	0.567081	0.847606	-0.99143	-0.0042532	-0.0937343	0.223035	0.0608659	0.847606	-0.99143	-0.99143
TTHERM_01184150	IR	L2FC_CPM	0.899153	0.445253	1.00418	-0.631274	0.0284098	-0.763822	0.469534	0.0553052	1.00418	-0.763822	1.00418
TTHERM_01184150	CPT	L2FC_CPM	0.202963	0.0425076	1.24154	0.927742	-0.656724	0.398772	0.245882	0.0282732	1.24154	-0.656724	1.24154
TTHERM_01184150	UV	L2FC_CPM	-0.0830489	0.2854	0.369377	-0.22748	-1.37356	-0.540474	-0.146748	0.0487577	0.369377	-1.37356	-1.37356
TTHERM_01456070	MMS	L2FC_CPM	0.156139	-0.181434	0	0.170623	0	-0.332321	0.103487	0.0102006	0.170623	-0.332321	-0.332321
TTHERM_01456070	HP	L2FC_CPM	0.333657	-0.055282	0.297305	-0.0833527	0.148072	-0.575928	0.295445	0.020485	0.333657	-0.575928	-0.575928
TTHERM_01456070	HU	L2FC_CPM	-0.00306753	0.0209972	-0.257777	1.036	-0.415547	-0.327667	0.3788	0.0492327	1.036	-0.415547	1.036
TTHERM_01456070	IR	L2FC_CPM	-0.0171737	0.0353713	-0.22049	0.617136	0	-0.283394	0.30582	0.0244531	0.617136	-0.283394	0.617136
TTHERM_01456070	CPT	L2FC_CPM	-0.442616	-0.000794876	-0.024624	-0.00651188	-0.00208853	0.348296	-0.364158	0.0119693	0.348296	-0.442616	-0.442616
TTHERM_01456070	UV	L2FC_CPM	0	-0.445702	0	-0.461616	1.12013	0.586598	-0.462859	0.0482007	1.12013	-0.462859	1.12013
TTHERM_000996429	MMS	L2FC_CPM	0	0.0186401	0.0306509	-0.192921	-0.0380012	-0.111292	0.0205163	0.00443216	0.0306509	-0.192921	-0.192921
TTHERM_000996429	HP	L2FC_CPM	0	-0.0626396	0.0911142	0	0.131639	0.133789	-0.167092	0.00740482	0.133789	-0.167092	-0.167092
TTHERM_000996429	HU	L2FC_CPM	-0.163388	-0.46819	1.07737	-0.4757	-0.301626	0.209574	-0.102446	0.0515614	1.07737	-0.4757	1.07737
TTHERM_000996429	IR	L2FC_CPM	0.491918	-0.932191	0.144739	-0.432228	0.143071	-0.649128	0.6259	0.0495556	0.6259	-0.932191	-0.932191
TTHERM_000996429	CPT	L2FC_CPM	0.444763	-0.61528	-0.638218	-1.15275	0.42747	0.0178194	-0.0500028	0.0293962	0.444763	-1.15275	-1.15275
TTHERM_000996429	UV	L2FC_CPM	0.167487	-1.0225	-0.939334	-0.401083	-0.542909	1.19134	-0.605489	0.0635517	1.19134	-1.0225	1.19134
TTHERM_00460450	MMS	L2FC_CPM	0.369168	-0.996921	-1.34208	-1.56784	-1.22369	-0.847111	-1.34253	0.0356973	0.369168	-1.56784	-1.56784
TTHERM_00460450	HP	L2FC_CPM	1.2277	0.147931	0.753038	0.157381	0.639393	-0.0349908	-0.0298293	0.0297854	1.2277	-0.0349908	1.2277
TTHERM_00460450	HU	L2FC_CPM	1.18035	0.572449	0.462666	-1.24393	-0.454527	-0.940848	-2.12138	0.13294	1.18035	-2.12138	-2.12138
TTHERM_00460450	IR	L2FC_CPM	-0.621495	0.157155	1.68345	0.378968	1.10835	0.784579	0.316615	0.0554432	1.68345	-0.621495	1.68345
TTHERM_00460450	CPT	L2FC_CPM	-0.163573	-1.50445	-1.5348	-2.51749	-1.58861	-1.69594	-2.12473	0.0378504	-0.163573	-2.51749	-2.51749
TTHERM_00460450	UV	L2FC_CPM	-0.161547	-0.0653578	0.295346	0.454333	1.00782	0.442654	1.31221	0.0416285	1.31221	-0.161547	1.31221
TTHERM_00998800	MMS	L2FC_CPM	0.538026	-0.703062	-0.335545	-0.927519	-1.05856	-0.778458	-0.964377	0.0299036	0.538026	-1.05856	-1.05856
TTHERM_00998800	HP	L2FC_CPM	-0.326381	-0.602618	-0.212631	0.0447398	0.0398123	0.12999	-0.101886	0.0174805	0.12999	-0.602618	-0.602618
TTHERM_00998800	HU	L2FC_CPM	-0.13625	0.463844	0.801545	0.857642	1.09675	0.874492	1.09853	0.0362816	1.09853	-0.13625	1.09853
TTHERM_00998800	IR	L2FC_CPM	-0.850035	0.12276	-0.645701	-0.631236	-0.385663	-0.595118	-0.271061	0.0274134	0.12276	-0.850035	-0.850035
TTHERM_00998800	CPT	L2FC_CPM	-0.746411	1.68199	2.68006	2.40858	2.13687	1.81091	0.920395	0.0455989	2.68006	-0.746411	2.68006
TTHERM_00998800	UV	L2FC_CPM	-0.631477	-1.5208	-0.584993	-0.0422252	-0.105068	0.105305	0.0624156	0.0484346	0.105305	-1.5208	-1.5208
TTHERM_00341250	MMS	L2FC_CPM	-0.377055	0.443824	-0.724008	-0.452485	-0.873432	-1.85689	-0.561411	0.0390485	0.443824	-1.85689	-1.85689
TTHERM_00341250	HP	L2FC_CPM	-0.323738	-0.349677	-1.41984	-1.06281	-0.789598	-0.357367	0.52621	0.0448296	0.52621	-1.41984	-1.41984
TTHERM_00341250	HU	L2FC_CPM	1.53713	-0.51596	0.837647	-0.137572	-0.302636	0.00291309	-0.985589	0.0861453	1.53713	-0.985589	1.53713
TTHERM_00341250	IR	L2FC_CPM	0.646308	0.0954744	1.44155	0.124946	-0.459075	0.662405	-1.02291	0.0639272	1.44155	-1.02291	1.44155
TTHERM_00341250	CPT	L2FC_CPM	-1.00107	-1.65048	-1.64762	-2.04016	-1.86503	-3.30978	-2.17157	0.0389632	-1.00107	-3.30978	-3.30978
TTHERM_00341250	UV	L2FC_CPM	-0.97811	0.820722	-1.73637	0.526921	0.301477	-1.31877	0.0344862	0.0891152	0.820722	-1.73637	-1.73637
TTHERM_00277070	MMS	L2FC_CPM	-0.795116	0.524679	0.615582	0.695228	1.26294	0.731978	-0.602653	0.0386776	1.26294	-0.795116	1.26294
TTHERM_00277070	HP	L2FC_CPM	-0.436866	-1.52166	-1.49034	-1.39713	-0.709684	0.121374	-1.49747	0.0483474	0.121374	-1.52166	-1.52166
TTHERM_00277070	HU	L2FC_CPM	-0.788624	-0.265888	-0.26162	-0.341971	0.0402072	-0.678355	-0.631345	0.0331859	0.0402072	-0.788624	-0.788624
TTHERM_00277070	IR	L2FC_CPM	-0.0805868	-0.205187	0.0986621	0.708168	0.601864	0.445785	0.976429	0.0345013	0.976429	-0.205187	0.976429
TTHERM_00277070	CPT	L2FC_CPM	-0.719869	-1.65955	-1.40551	-1.265	-1.3676	-1.31715	-0.814588	0.0176391	-0.719869	-1.65955	-1.65955
TTHERM_00277070	UV	L2FC_CPM	-1.64639	-0.220091	0.0269827	-0.149672	0.213539	0.350374	0.320179	0.0508415	0.350374	-1.64639	-1.64639
TTHERM_00953980	MMS	L2FC_CPM	-0.787676	-0.676134	0.0363901	-1.15388	-1.69435	0.323396	0.165695	0.0450404	0.323396	-1.69435	-1.69435
TTHERM_00953980	HP	L2FC_CPM	0.279699	-0.261921	0.438223	-1.2744	-1.55044	-0.0945007	-0.344944	0.0528592	0.438223	-1.55044	-1.55044
TTHERM_00953980	HU	L2FC_CPM	0.326558	0.724281	0.707414	0.205161	-0.371625	-0.51416	-0.12405	0.050739	0.724281	-0.51416	0.724281
TTHERM_00953980	IR	L2FC_CPM	0.852331	1.1041	0.550325	-0.222946	-0.354485	0.0137249	0.549234	0.0433658	1.1041	-0.354485	1.1041
TTHERM_00953980	CPT	L2FC_CPM	0.533088	0.334802	1.27998	1.06392	0.787801	0.514487	0.678038	0.0149222	1.27998	0.334802	1.27998
TTHERM_00953980	UV	L2FC_CPM	-1.34344	-0.805197	-0.404857	0.130829	0.076746	-0.0820825	-0.235773	0.0462436	0.130829	-1.34344	-1.34344
TTHERM_02641280	MMS	L2FC_CPM	-0.168176	0.219039	-0.471261	-0.444611	-0.732799	-1.16373	-1.18072	0.0307416	0.219039	-1.18072	-1.18072
TTHERM_02641280	HP	L2FC_CPM	0.759188	0.843685	0.190321	0.0922705	0.430061	-0.785607	-0.688955	0.042933	0.843685	-0.785607	0.843685
TTHERM_02641280	HU	L2FC_CPM	0.194915	0.116093	0.336245	0.00735833	0.0510157	-0.196568	0.063853	0.0165331	0.336245	-0.196568	0.336245
TTHERM_02641280	IR	L2FC_CPM	0.012634	0.035837	0.2336	-0.188485	-0.485206	-0.728191	-0.615773	0.0316499	0.2336	-0.728191	-0.728191
TTHERM_02641280	CPT	L2FC_CPM	0.466718	0.391149	0.47336	-0.0291791	-0.0347057	-0.413545	-0.770991	0.0225205	0.47336	-0.770991	-0.770991
TTHERM_02641280	UV	L2FC_CPM	0.299296	-0.0363225	-0.155603	-0.491098	-0.359052	-0.236941	-0.290865	0.0216416	0.299296	-0.491098	-0.491098
TTHERM_00333210	MMS	L2FC_CPM	0.0710277	0.0205848	-0.378098	-0.548376	-0.453529	-1.23181	-0.978343	0.0286236	0.0710277	-1.23181	-1.23181
TTHERM_00333210	HP	L2FC_CPM	0.545472	0.472797	0.0895503	0.159941	0.387679	-0.0433747	0.0564646	0.0150845	0.545472	-0.0433747	0.545472
TTHERM_00333210	HU	L2FC_CPM	0.47554	0.0888887	0.293992	0.0761195	-0.0663842	0.0863661	-0.121584	0.0203267	0.47554	-0.121584	0.47554
TTHERM_00333210	IR	L2FC_CPM	0.372984	0.523063	1.1391	0.729309	0.360187	0.197196	-0.218617	0.0321215	1.1391	-0.218617	1.1391
TTHERM_00333210	CPT	L2FC_CPM	0.762561	0.139331	0.264732	0.00631517	-0.0349424	-0.195393	-0.48205	0.0182775	0.762561	-0.48205	0.762561
TTHERM_00333210	UV	L2FC_CPM	0.7818	0.10472	-0.14074	0.303593	0.116445	-0.394093	-0.299128	0.0328868	0.7818	-0.394093	0.7818
TTHERM_002653364	MMS	L2FC_CPM	-0.852738	2.36067	2.16096	0.454359	0.934202	0.258917	-0.354708	0.0634413	2.36067	-0.852738	2.36067
TTHERM_002653364	HP	L2FC_CPM	-0.336263	1.87864	1.38088	-0.746206	-0.735402	-0.630446	-1.09377	0.0732572	1.87864	-1.09377	1.87864
TTHERM_002653364	HU	L2FC_CPM	-1.39329	1.01117	0.420936	-0.0172076	0.588096	-0.697864	0.14185	0.0841516	1.01117	-1.39329	-1.39329
TTHERM_002653364	IR	L2FC_CPM	-0.916102	0.0990813	0.0131276	0.143493	-0.818563	-0.337157	-0.211226	0.0364799	0.143493	-0.916102	-0.916102
TTHERM_002653364	CPT	L2FC_CPM	0.0573367	-0.0137816	0.702849	-0.361601	-1.20681	-0.401704	0.012965	0.027182	0.702849	-1.20681	-1.20681
TTHERM_002653364	UV	L2FC_CPM	0.169481	-0.180581	0.417209	0.102047	-1.41676	0.607118	-0.110148	0.0507701	0.607118	-1.41676	-1.41676
TTHERM_01472400	MMS	L2FC_CPM	-0.376027	0	0.304744	-0.0823708	0.192745	-0.322424	0.149181	0.0147462	0.304744	-0.376027	-0.376027
TTHERM_01472400	HP	L2FC_CPM	0.044678	0	0.304744	-0.0823708	0.0456285	0	-0.175801	0.0093315	0.304744	-0.175801	0.304744
TTHERM_01472400	HU	L2FC_CPM	0.791498	0.272675	0.100411	-0.111115	0.442457	-0.224911	1.02599	0.045616	1.02599	-0.224911	1.02599
TTHERM_01472400	IR	L2FC_CPM	0.239813	0.068052	0.533017	0.165125	-0.0308696	-1.15936	1.20693	0.053247	1.20693	-1.15936	1.20693
TTHERM_01472400	CPT	L2FC_CPM	0.444763	-0.767966	-0.420865	-0.458395	-0.167352	-1.01509	0.264272	0.0263981	0.444763	-1.01509	-1.01509
TTHERM_01472400	UV	L2FC_CPM	0.167487	-0.746837	-0.44909	0.0702147	-1.17983	-0.248976	-1.07776	0.0495484	0.167487	-1.17983	-1.17983
TTHERM_00826730	MMS	L2FC_CPM	-0.480023	0.148605	0.827178	0.648522	-0.0295681	0.281419	-0.898403	0.0342264	0.827178	-0.898403	-0.898403
TTHERM_00826730	HP	L2FC_CPM	-1.17041	0.163986	-0.397969	0.972812	-0.432835	0.580908	-0.539878	0.0505479	0.972812	-1.17041	-1.17041
TTHERM_00826730	HU	L2FC_CPM	1.4045	-0.0693113	1.77274	-0.186726	0.837459	0.861359	0.720725	0.0640507	1.77274	-0.186726	1.77274
TTHERM_00826730	IR	L2FC_CPM	4.05734	-1.0958	0.714832	-1.6311	-0.728958	-0.795258	-1.27859	0.141385	4.05734	-1.6311	4.05734
TTHERM_00826730	CPT	L2FC_CPM	-1.09776	-0.587202	0.0835814	-0.126325	0.125836	-1.68645	0.726654	0.0408426	0.726654	-1.68645	-1.68645
TTHERM_00826730	UV	L2FC_CPM	0.45472	-1.21698	-0.0374855	-0.450445	-0.643478	-0.901137	-0.731418	0.050988	0.45472	-1.21698	-1.21698
TTHERM_01251190	MMS	L2FC_CPM	0.106814	-2.31588	-2.65632	-2.3297	-2.80354	-1.99269	-2.85725	0.0628981	0.106814	-2.85725	-2.85725
TTHERM_01251190	HP	L2FC_CPM	-0.451678	-0.0287	-1.59513	-0.573499	-0.732083	0.482607	-0.95031	0.0483716	0.482607	-1.59513	-1.59513
TTHERM_01251190	HU	L2FC_CPM	-0.624566	-1.79891	-0.613831	-1.93376	-0.455556	-0.144934	-0.678177	0.0816437	-0.144934	-1.93376	-1.93376
TTHERM_01251190	IR	L2FC_CPM	1.15842	-0.959721	-0.846882	-1.39238	-0.567459	0.662049	1.04352	0.0872116	1.15842	-1.39238	-1.39238
TTHERM_01251190	CPT	L2FC_CPM	-0.516623	-2.60207	-1.55897	-0.884061	-1.07255	0.500363	0.751604	0.0604615	0.751604	-2.60207	-2.60207
TTHERM_01251190	UV	L2FC_CPM	2.96623	0.0461464	-0.211657	-0.401554	-0.948498	0.97703	0.595676	0.0952806	2.96623	-0.948498	2.96623
TTHERM_00648539	MMS	L2FC_CPM	0.320436	-0.977547	0.426864	0.558118	-0.188761	-0.137324	0.0822941	0.0280028	0.558118	-0.977547	-0.977547
TTHERM_00648539	HP	L2FC_CPM	0.0595943	-0.343518	0.0467978	-0.337284	0.160839	0.30199	0.12222	0.0161495	0.30199	-0.343518	-0.343518
TTHERM_00648539	HU	L2FC_CPM	0.0916121	0.363324	-0.128915	-0.280361	0.309258	-0.136829	-0.900632	0.0437261	0.363324	-0.900632	-0.900632
TTHERM_00648539	IR	L2FC_CPM	-0.553854	-0.858507	-0.192508	-0.639778	-0.336083	-0.775673	-0.357466	0.0223844	-0.192508	-0.858507	-0.858507
TTHERM_00648539	CPT	L2FC_CPM	0.426041	1.01802	1.33625	0.795009	0.66708	0.553301	0.819589	0.0135096	1.33625	0.426041	1.33625
TTHERM_00648539	UV	L2FC_CPM	-0.470388	0.503119	-0.0237001	-0.0774814	-0.65297	0.0763452	0.123641	0.0324434	0.503119	-0.65297	-0.65297
TTHERM_00976420	MMS	L2FC_CPM	0.320601	0.0545087	-0.306125	0.0315277	0.0138183	-0.317463	0.149181	0.0127723	0.320601	-0.317463	0.320601
TTHERM_00976420	HP	L2FC_CPM	0.811365	-0.310291	-0.0725211	-0.00464461	0.708385	0.134311	0.142961	0.0265442	0.811365	-0.310291	0.811365
TTHERM_00976420	HU	L2FC_CPM	0.172094	-0.449711	1.10891	1.29	-0.830314	0.975663	0.66969	0.078142	1.29	-0.830314	1.29
TTHERM_00976420	IR	L2FC_CPM	-0.464941	0.0459586	1.59075	1.29002	-0.664377	0.818433	-0.579626	0.0730941	1.59075	-0.664377	1.59075
TTHERM_00976420	CPT	L2FC_CPM	2.47514	-0.822537	1.01238	-0.21536	1.12378	1.83559	1.81721	0.0514151	2.47514	-0.822537	2.47514
TTHERM_00976420	UV	L2FC_CPM	-0.309424	-1.91344	0.194917	-0.846685	-0.541774	0.569279	0.316657	0.0744278	0.569279	-1.91344	-1.91344
TTHERM_000073129	MMS	L2FC_CPM	-0.0954051	0.483804	-0.244324	-0.370768	0.325467	0.298762	-0.463974	0.0213051	0.483804	-0.463974	0.483804
TTHERM_000073129	HP	L2FC_CPM	0.782049	-0.541817	-0.151751	-0.205476	-0.531732	0.520103	-1.14272	0.0455382	0.782049	-1.14272	-1.14272
TTHERM_000073129	HU	L2FC_CPM	-0.14682	0.608451	0.668663	0.251612	-0.0829926	-0.768255	0.013615	0.0499645	0.668663	-0.768255	-0.768255
TTHERM_000073129	IR	L2FC_CPM	0.398489	0.467601	0.223776	-1.29219	-0.955446	-0.419961	0.216696	0.0577779	0.467601	-1.29219	-1.29219
TTHERM_000073129	CPT	L2FC_CPM	0.614492	1.13726	2.18875	1.70027	0.837732	1.83235	0.988105	0.0251579	2.18875	0.614492	2.18875
TTHERM_000073129	UV	L2FC_CPM	-0.867954	0.345932	0.4308	-0.120471	-0.017919	0.396606	0.133468	0.0350291	0.4308	-0.867954	-0.867954
TTHERM_00503730	MMS	L2FC_CPM	0.337248	1.82532	2.17389	1.74133	1.95673	1.7124	-0.258069	0.0413102	2.17389	-0.258069	2.17389
TTHERM_00503730	HP	L2FC_CPM	-1.53602	-2.53309	-2.98229	-3.81426	-4.39318	-0.647779	-3.51512	0.141849	-0.647779	-4.39318	-4.39318
TTHERM_00503730	HU	L2FC_CPM	1.65522	0.836537	0.780752	-0.0619894	-0.775785	0.279255	-0.426338	0.0824509	1.65522	-0.775785	1.65522
TTHERM_00503730	IR	L2FC_CPM	4.86874	0.680017	1.54655	0.210677	-0.390219	1.52142	0.0474015	0.109257	4.86874	-0.390219	4.86874
TTHERM_00503730	CPT	L2FC_CPM	-3.55549	-6.08075	-6.04089	-6.17044	-6.52211	-7.47153	-6.06164	0.11061	-3.55549	-7.47153	-7.47153
TTHERM_00503730	UV	L2FC_CPM	1.50796	1.42096	1.56295	0.750088	0.825153	-0.276982	-0.0422509	0.0545875	1.56295	-0.276982	1.56295
TTHERM_01028740	MMS	L2FC_CPM	-0.366246	0	0	0	0	-0.0388679	-0.416141	0.00911183	0	-0.416141	-0.416141
TTHERM_01028740	HP	L2FC_CPM	0	0	-0.0534487	0	0	-0.0388679	-0.112854	0.00261071	0	-0.112854	-0.112854
TTHERM_01028740	HU	L2FC_CPM	0	0	0	0	0	0	0	0	0	0	0
TTHERM_01028740	IR	L2FC_CPM	0	0	0	0	0	0	0	0	0	0	0
TTHERM_01028740	CPT	L2FC_CPM	0	-0.205249	-1.17086	-0.950851	-0.774581	0.370719	-0.557229	0.0282646	0.370719	-1.17086	-1.17086
TTHERM_01028740	UV	L2FC_CPM	-0.567715	0.0301293	-0.240244	-0.465468	0	-0.00279931	-0.143053	0.0203953	0.0301293	-0.567715	-0.567715
TTHERM_00043740	MMS	L2FC_CPM	0.160775	0.089519	-0.428435	-0.450486	-0.465783	-0.606591	-0.517871	0.016396	0.160775	-0.606591	-0.606591
TTHERM_00043740	HP	L2FC_CPM	-0.188608	-0.164397	-0.671267	-0.98952	-0.659041	-0.761473	-0.919731	0.0236267	-0.164397	-0.98952	-0.98952
TTHERM_00043740	HU	L2FC_CPM	0.0511326	0.344457	-0.326953	0.258403	-0.636674	-0.589651	-0.505529	0.0446468	0.344457	-0.636674	-0.636674
TTHERM_00043740	IR	L2FC_CPM	-0.112874	-0.363145	-0.436245	-0.664367	-1.06825	-0.777322	-0.660834	0.0280477	-0.112874	-1.06825	-1.06825
TTHERM_00043740	CPT	L2FC_CPM	-0.791091	-0.278447	-0.939354	-1.01713	-0.754651	-0.907699	-1.10113	0.0129647	-0.278447	-1.10113	-1.10113
TTHERM_00043740	UV	L2FC_CPM	0.0101602	-0.628915	-0.357411	-0.243972	-0.373014	-0.305021	-0.505597	0.0177059	0.0101602	-0.628915	-0.628915
TTHERM_000222205	MMS	L2FC_CPM	0.444462	0.331488	0.274094	-0.505354	0.230746	-0.00169076	0.157046	0.0159477	0.444462	-0.505354	-0.505354
TTHERM_000222205	HP	L2FC_CPM	0.446666	0.537872	0.274094	-0.332371	0.230746	-0.194461	0.157046	0.0210885	0.537872	-0.332371	0.537872
TTHERM_000222205	HU	L2FC_CPM	0.049192	0.249313	-0.132593	-0.242393	-0.850375	-0.284681	0.52793	0.0462079	0.52793	-0.850375	-0.850375
TTHERM_000222205	IR	L2FC_CPM	-0.571995	0.431552	-1.03281	0.432711	-0.484639	-0.444254	0.278614	0.0480106	0.432711	-1.03281	-1.03281
TTHERM_000222205	CPT	L2FC_CPM	0.582802	0.0129772	0.0126076	-0.379273	0.67403	-0.0282429	0.424977	0.0179493	0.67403	-0.379273	0.67403
TTHERM_000222205	UV	L2FC_CPM	0.582802	0	0.426058	0.0491409	1.37013	-0.731762	0.261748	0.0500073	1.37013	-0.731762	1.37013
TTHERM_000654259	MMS	L2FC_CPM	-0.34304	-1.55692	-2.00703	-1.42021	-1.21813	-1.80116	-1.44382	0.0330825	-0.34304	-2.00703	-2.00703
TTHERM_000654259	HP	L2FC_CPM	-0.606147	-1.5855	-1.49615	-2.28556	-2.07766	-0.0242236	-0.169122	0.0735833	-0.0242236	-2.28556	-2.28556
TTHERM_000654259	HU	L2FC_CPM	-1.43582	0.00487454	-0.778203	-0.305852	-0.40888	0.0551525	-0.0869281	0.0573294	0.0551525	-1.43582	-1.43582
TTHERM_000654259	IR	L2FC_CPM	0.169145	0.178587	-0.728544	-0.339267	-0.249946	0.647771	0.554317	0.0409444	0.647771	-0.728544	-0.728544
TTHERM_000654259	CPT	L2FC_CPM	-1.51967	1.09695	0.505138	-1.00934	-0.50058	-1.94492	-1.27126	0.0566207	1.09695	-1.94492	-1.94492
TTHERM_000654259	UV	L2FC_CPM	0.0301948	0.310858	0.280203	-0.540983	-0.346925	-0.610312	-0.0859677	0.0326001	0.310858	-0.610312	-0.610312
TTHERM_001581379	MMS	L2FC_CPM	-0.366246	0.282317	0.00248336	0.343838	-0.146449	0.293199	-0.292979	0.0165878	0.343838	-0.366246	-0.366246
TTHERM_001581379	HP	L2FC_CPM	-0.161744	0.513677	0.345275	0.381935	0.164093	0.117323	-0.287191	0.0195689	0.513677	-0.287191	0.513677
TTHERM_001581379	HU	L2FC_CPM	-0.362306	0.19023	-0.663674	0.54525	0.784136	0.26099	0.422811	0.0509572	0.784136	-0.663674	0.784136
TTHERM_001581379	IR	L2FC_CPM	0.575461	-0.5073	-0.694298	1.04149	0.00770075	-0.122934	-0.110324	0.0484693	1.04149	-0.694298	1.04149
TTHERM_001581379	CPT	L2FC_CPM	0.995445	0.102964	-0.0785269	-0.708395	-0.174581	-0.700413	-0.288153	0.0266893	0.995445	-0.708395	0.995445
TTHERM_001581379	UV	L2FC_CPM	0.705869	-0.583973	0	-0.499013	-1.16014	0	0.044517	0.0507653	0.705869	-1.16014	-1.16014
TTHERM_00297199	MMS	L2FC_CPM	-0.275165	-1.00963	-0.707866	-0.179014	-0.468057	-0.273793	-0.432602	0.0166937	-0.179014	-1.00963	-1.00963
TTHERM_00297199	HP	L2FC_CPM	-0.642472	-1.41545	-0.847489	-0.819357	0.00818241	0.339346	0.283725	0.0476285	0.339346	-1.41545	-1.41545
TTHERM_00297199	HU	L2FC_CPM	-0.253312	-0.73457	-0.364511	-0.66384	-0.21579	0.407162	0.0912651	0.0441205	0.407162	-0.73457	-0.73457
TTHERM_00297199	IR	L2FC_CPM	-0.829193	0.250811	0.314176	0.596594	0.515115	0.548283	0.347901	0.0316586	0.596594	-0.829193	-0.829193
TTHERM_00297199	CPT	L2FC_CPM	-0.626847	-0.436025	-0.396641	-0.0835209	0.0899456	0.0957464	0.287134	0.0165838	0.287134	-0.626847	-0.626847
TTHERM_00297199	UV	L2FC_CPM	-0.581627	-0.617768	-0.679946	0.121081	-0.0252108	0.0864525	0.114982	0.0313846	0.121081	-0.679946	-0.679946
TTHERM_00900600	MMS	L2FC_CPM	-1.10586	0.102346	-0.00816461	0.223096	0.102124	-0.896701	-0.441887	0.0300248	0.223096	-1.10586	-1.10586
TTHERM_00900600	HP	L2FC_CPM	-0.68523	-0.0104593	0.226746	0.274306	0.387226	-0.337642	-0.512374	0.0291145	0.387226	-0.68523	-0.68523
TTHERM_00900600	HU	L2FC_CPM	-0.600077	-0.395053	1.01902	-0.451449	-0.499823	0.161333	1.56025	0.0816524	1.56025	-0.600077	1.56025
TTHERM_00900600	IR	L2FC_CPM	0.257514	-0.274755	0.23985	-1.33862	-0.175775	-0.713576	1.42749	0.0707002	1.42749	-1.33862	1.42749
TTHERM_00900600	CPT	L2FC_CPM	0.131325	0.181811	0.702849	0.364743	0.577653	0.113575	-0.014233	0.0122807	0.702849	-0.014233	0.702849
TTHERM_00900600	UV	L2FC_CPM	-0.0752995	-0.480017	1.22416	0.840494	0.538321	1.00852	0.0973709	0.0497955	1.22416	-0.480017	1.22416
TTHERM_01499890	MMS	L2FC_CPM	-0.391462	0.313515	-0.363164	-0.442803	-0.697006	-1.98155	-1.48626	0.0456178	0.313515	-1.98155	-1.98155
TTHERM_01499890	HP	L2FC_CPM	2.77133	6.17965	5.60446	3.96257	3.38199	1.10072	1.18319	0.0932915	6.17965	1.10072	6.17965
TTHERM_01499890	HU	L2FC_CPM	0.216102	-0.476663	-0.941366	1.04668	-0.0280744	-0.592769	-0.949814	0.076949	1.04668	-0.949814	1.04668
TTHERM_01499890	IR	L2FC_CPM	5.49047	-0.27212	-0.923253	0.576745	0.911787	-0.414216	-0.870868	0.140075	5.49047	-0.923253	5.49047
TTHERM_01499890	CPT	L2FC_CPM	0.79896	0	0.192706	0.20399	0.163725	-0.396699	-1.86732	0.0362116	0.79896	-1.86732	-1.86732
TTHERM_01499890	UV	L2FC_CPM	3.71878	-0.404143	-0.229005	-0.71171	-0.03161	-0.119443	-0.565124	0.0939331	3.71878	-0.71171	3.71878
TTHERM_01640980	MMS	L2FC_CPM	-0.384818	0.322731	0.444407	-1.50954	-0.559716	-1.20815	-0.596041	0.0430236	0.444407	-1.50954	-1.50954
TTHERM_01640980	HP	L2FC_CPM	0.521594	0.367434	1.13429	-1.61405	-0.705151	-1.04526	0.0972676	0.0684588	1.13429	-1.61405	-1.61405
TTHERM_01640980	HU	L2FC_CPM	0.181226	0.697467	1.6265	0.288391	-0.329509	0.890929	0.0177693	0.061084	1.6265	-0.329509	1.6265
TTHERM_01640980	IR	L2FC_CPM	0.972752	0.144038	0.41219	-0.775738	-0.326591	1.86489	0.643472	0.0670243	1.86489	-0.775738	1.86489
TTHERM_01640980	CPT	L2FC_CPM	0.0935037	1.03825	1.51309	0.735659	0.443202	1.38506	0.819589	0.0227214	1.51309	0.0935037	1.51309
TTHERM_01640980	UV	L2FC_CPM	-0.374364	-0.76559	0.0181126	-1.0338	-0.934353	-0.00552339	-0.0403158	0.0412521	0.0181126	-1.0338	-1.0338
TTHERM_01606700	MMS	L2FC_CPM	0.333657	-0.218552	-0.0680858	0.0457711	-0.824739	-0.656865	-0.908899	0.0279793	0.333657	-0.908899	-0.908899
TTHERM_01606700	HP	L2FC_CPM	2.73993	1.0095	0.914662	1.47455	0.686423	-0.992878	-0.515377	0.0756745	2.73993	-0.992878	2.73993
TTHERM_01606700	HU	L2FC_CPM	0	-0.281835	1.05209	0.49759	0	-0.49764	-0.171759	0.0517023	1.05209	-0.49764	1.05209
TTHERM_01606700	IR	L2FC_CPM	-0.194605	-0.356016	0.591899	0.00680064	-0.981355	0.189537	0.504125	0.0445133	0.591899	-0.981355	-0.981355
TTHERM_01606700	CPT	L2FC_CPM	3.35008	4.15377	3.65199	1.96376	1.89242	0.799642	-0.190583	0.0636617	4.15377	-0.190583	4.15377
TTHERM_01606700	UV	L2FC_CPM	0.326143	0.651925	0.75436	-0.290958	-1.00628	-1.53227	-2.5531	0.113779	0.75436	-2.5531	-2.5531
TTHERM_001031039	MMS	L2FC_CPM	-0.0443624	-0.322591	-0.0449687	-0.191882	0.00247188	-0.621995	-0.46435	0.0136804	0.00247188	-0.621995	-0.621995
TTHERM_001031039	HP	L2FC_CPM	0.431801	0.19279	-0.0541801	-0.160605	-0.000662094	-1.01691	-0.452868	0.0317627	0.431801	-1.01691	-1.01691
TTHERM_001031039	HU	L2FC_CPM	0.343758	-0.567875	-0.193188	0.142648	0.405305	0.469599	-0.0204319	0.0378951	0.469599	-0.567875	-0.567875
TTHERM_001031039	IR	L2FC_CPM	0.243555	-0.645497	0.324924	-0.289677	-1.0142	0.0887107	-0.225707	0.0414819	0.324924	-1.0142	-1.0142
TTHERM_001031039	CPT	L2FC_CPM	0.432566	-0.119393	-0.566729	-0.259227	-0.624164	-0.421729	0.226654	0.0196177	0.432566	-0.624164	-0.624164
TTHERM_001031039	UV	L2FC_CPM	-0.370583	0.431615	0.526104	-0.161614	0.242602	0.78087	-0.108455	0.0346936	0.78087	-0.370583	0.78087
TTHERM_00687260	MMS	L2FC_CPM	-0.366395	-0.943193	-1.15774	-2.10871	-1.69993	-2.36179	-2.10256	0.049543	-0.366395	-2.36179	-2.36179
TTHERM_00687260	HP	L2FC_CPM	-0.446122	-0.435555	0.301333	-0.584017	-1.15703	0.260829	-0.890741	0.038809	0.301333	-1.15703	-1.15703
TTHERM_00687260	HU	L2FC_CPM	-0.227468	-0.957811	-0.269554	-0.647476	-0.545135	-0.275922	-0.241744	0.0297405	-0.227468	-0.957811	-0.957811
TTHERM_00687260	IR	L2FC_CPM	-0.156246	-1.14185	-1.05181	-0.603855	-0.444997	0.300739	0.124584	0.0495913	0.300739	-1.14185	-1.14185
TTHERM_00687260	CPT	L2FC_CPM	-0.826768	-0.987906	-1.54948	-2.12447	-1.79457	-1.09013	-0.643408	0.0300451	-0.643408	-2.12447	-2.12447
TTHERM_00687260	UV	L2FC_CPM	-1.25869	-1.10082	-0.627633	-0.845637	-0.521322	-0.284721	-0.0282234	0.0422264	-0.0282234	-1.25869	-1.25869
TTHERM_00982970	MMS	L2FC_CPM	0.853979	-0.797108	0.263059	-0.34938	-0.722064	0.434136	-0.189492	0.0353649	0.853979	-0.797108	0.853979
TTHERM_00982970	HP	L2FC_CPM	2.66406	1.97327	0.756395	1.12237	0.285633	0.665413	0.321796	0.0510324	2.66406	0.285633	2.66406
TTHERM_00982970	HU	L2FC_CPM	2.46103	-0.0737917	0.528424	0.222632	-0.107386	0.817734	-0.071753	0.0749964	2.46103	-0.107386	2.46103
TTHERM_00982970	IR	L2FC_CPM	-0.0236188	-1.09169	-0.796044	-1.2224	-2.19145	-0.178532	-0.513867	0.0688968	-0.0236188	-2.19145	-2.19145
TTHERM_00982970	CPT	L2FC_CPM	-0.110522	0.206827	-0.928164	-1.35189	-1.41929	-1.6773	-1.78994	0.0404313	0.206827	-1.78994	-1.78994
TTHERM_00982970	UV	L2FC_CPM	0.364244	-0.0806556	-0.805733	-1.11083	-0.190033	-0.331442	-0.822147	0.0467096	0.364244	-1.11083	-1.11083
TTHERM_00397050	MMS	L2FC_CPM	0.000914317	0.120986	0.274094	0.14218	-0.185147	0.0740226	0	0.00788441	0.274094	-0.185147	0.274094
TTHERM_00397050	HP	L2FC_CPM	0.132934	0.292788	0.274094	-0.0909147	-0.284518	0.313919	0	0.0150519	0.313919	-0.284518	0.313919
TTHERM_00397050	HU	L2FC_CPM	-0.453742	-0.21819	0	0	0	-0.643345	0.455989	0.0373959	0.455989	-0.643345	-0.643345
TTHERM_00397050	IR	L2FC_CPM	0	0	-0.156536	0	0	-0.458717	0.281872	0.0165699	0.281872	-0.458717	-0.458717
TTHERM_00397050	CPT	L2FC_CPM	0	0.584035	-0.918891	-0.135764	-0.204871	0.436405	-0.654141	0.0265765	0.584035	-0.918891	-0.918891
TTHERM_00397050	UV	L2FC_CPM	-0.0360124	0.528637	-0.170384	0.238616	-0.911679	0.519134	-0.334835	0.0430614	0.528637	-0.911679	-0.911679
TTHERM_002653496	MMS	L2FC_CPM	0.339788	0	0	-0.278443	-0.250029	0.109602	0	0.0114774	0.339788	-0.278443	0.339788
TTHERM_002653496	HP	L2FC_CPM	0.730865	0.127802	-0.0223906	0	0.230746	0.109602	0.123196	0.014359	0.730865	-0.0223906	0.730865
TTHERM_002653496	HU	L2FC_CPM	-0.731387	0.505097	0.228264	-0.469491	-0.508181	0.279434	0	0.0503303	0.505097	-0.731387	-0.731387
TTHERM_002653496	IR	L2FC_CPM	-0.620512	-0.60744	-0.673511	-1.34188	0	-0.234239	-0.634271	0.0352835	0	-1.34188	-1.34188
TTHERM_002653496	CPT	L2FC_CPM	-0.00770409	-1.2034	0.426058	0.47466	-0.472239	-0.48737	-0.942993	0.0323845	0.47466	-1.2034	-1.2034
TTHERM_002653496	UV	L2FC_CPM	-0.286012	0	-0.0230319	0.47466	-0.0629857	0.000335761	-0.483111	0.0235887	0.47466	-0.483111	-0.483111
TTHERM_01491730	MMS	L2FC_CPM	-0.109927	-0.685464	0.436188	-0.671532	-0.45711	0.043862	-0.0475834	0.0237337	0.436188	-0.685464	-0.685464
TTHERM_01491730	HP	L2FC_CPM	0.582808	-0.542475	1.63088	-0.469906	0.282804	-0.725386	0.330378	0.0532485	1.63088	-0.725386	1.63088
TTHERM_01491730	HU	L2FC_CPM	1.14834	0.334259	0.189388	1.302	-0.979411	-0.233463	0.267805	0.0759548	1.302	-0.979411	1.302
TTHERM_01491730	IR	L2FC_CPM	0.220431	1.47139	0.59361	1.33596	-0.137401	-0.60208	-0.698109	0.0687043	1.47139	-0.698109	1.47139
TTHERM_01491730	CPT	L2FC_CPM	1.55397	0.396257	2.35038	1.85324	1.46053	0.308979	1.05992	0.0324226	2.35038	0.308979	2.35038
TTHERM_01491730	UV	L2FC_CPM	0.901423	-0.194642	1.10059	0.314279	0.131958	-0.411925	-0.478631	0.0508417	1.10059	-0.478631	1.10059
TTHERM_01689280	MMS	L2FC_CPM	-0.0381659	-0.0406434	0	0	0	-0.185109	0.193373	0.00559489	0.193373	-0.185109	0.193373
TTHERM_01689280	HP	L2FC_CPM	-0.0381659	0.042788	0	0.00756196	0.0359778	-0.521121	-0.26091	0.0126928	0.042788	-0.521121	-0.521121
TTHERM_01689280	HU	L2FC_CPM	-0.18056	0.198179	0.258496	-0.372319	1.5222	-0.372793	-0.0861905	0.0587507	1.5222	-0.372793	1.5222
TTHERM_01689280	IR	L2FC_CPM	-0.0729684	-0.0216258	0.539309	0.291488	0.334373	-1.2285	0.230897	0.0416529	0.539309	-1.2285	-1.2285
TTHERM_01689280	CPT	L2FC_CPM	0.0643388	-0.42985	-0.136676	0.185112	0.252889	-0.425573	-1.05712	0.0219717	0.252889	-1.05712	-1.05712
TTHERM_01689280	UV	L2FC_CPM	-0.273339	-0.0947971	0.380633	0.0940231	0.393494	-0.52201	-0.604223	0.0349286	0.393494	-0.604223	-0.604223
TTHERM_000834899	MMS	L2FC_CPM	0.954467	1.10925	-0.0258344	-0.145202	0.939776	0.268403	0.564242	0.0269426	1.10925	-0.145202	1.10925
TTHERM_000834899	HP	L2FC_CPM	0.263433	0.377411	-0.43958	0.261052	0.815414	0.451058	-0.727136	0.0343907	0.815414	-0.727136	0.815414
TTHERM_000834899	HU	L2FC_CPM	-0.556401	-0.499191	0.633136	0.077193	0.265444	-0.441814	-0.164121	0.0472403	0.633136	-0.556401	0.633136
TTHERM_000834899	IR	L2FC_CPM	-0.363472	0.0637704	1.60653	0.603522	0.216712	0.358146	-0.137379	0.0473395	1.60653	-0.363472	1.60653
TTHERM_000834899	CPT	L2FC_CPM	-0.263219	0.410906	-0.311435	-0.643102	0.344016	-0.180622	0.502719	0.0209467	0.502719	-0.643102	-0.643102
TTHERM_000834899	UV	L2FC_CPM	0.154324	-0.204356	-0.018548	-0.0180202	-0.543083	0.393441	0.344647	0.0271185	0.393441	-0.543083	-0.543083
TTHERM_001302815	MMS	L2FC_CPM	-0.361925	-0.506334	-0.22659	0	0.230746	0.211132	0.0671605	0.0164102	0.230746	-0.506334	-0.506334
TTHERM_001302815	HP	L2FC_CPM	-0.184407	-0.299832	0	0.421656	0.230746	0.211132	0.0671605	0.0170712	0.421656	-0.299832	0.421656
TTHERM_001302815	HU	L2FC_CPM	0.183569	0.0106737	-0.544143	0	0.456269	0	-0.449126	0.0356142	0.456269	-0.544143	-0.544143
TTHERM_001302815	IR	L2FC_CPM	-0.267794	-0.49737	0	-0.432228	0.456269	0	-0.44344	0.0278669	0.456269	-0.49737	-0.49737
TTHERM_001302815	CPT	L2FC_CPM	0.628418	-0.42156	0.497535	0.0806708	-0.379452	-0.0163286	-0.0355559	0.0190305	0.628418	-0.42156	0.628418
TTHERM_001302815	UV	L2FC_CPM	0.849158	0	0.497535	-0.45735	0.501538	0.00781948	0.308964	0.03468	0.849158	-0.45735	0.849158
TTHERM_002653318	MMS	L2FC_CPM	-0.366246	-0.142989	0.00248336	0.216133	0.211123	0.240347	0	0.0122128	0.240347	-0.366246	-0.366246
TTHERM_002653318	HP	L2FC_CPM	0	0.0745551	0.299788	0.216133	0.211123	0.163005	0	0.00774325	0.299788	0	0.299788
TTHERM_002653318	HU	L2FC_CPM	-0.428768	0.160407	0.606385	0	0.342242	-0.0626164	-0.171225	0.0354494	0.606385	-0.428768	0.606385
TTHERM_002653318	IR	L2FC_CPM	0	0.240804	0.606385	-0.455339	0.246831	0.129843	0.313793	0.0248823	0.606385	-0.455339	0.606385
TTHERM_002653318	CPT	L2FC_CPM	0.396287	-0.34005	0.0648846	0.112502	0	-0.20643	0.394548	0.0133448	0.396287	-0.34005	0.396287
TTHERM_002653318	UV	L2FC_CPM	0.396287	0.441786	-0.191302	0.492456	-0.459447	0	0.338771	0.0294051	0.492456	-0.459447	0.492456
TTHERM_001663099	MMS	L2FC_CPM	0.978434	-0.862867	-0.396432	-1.19666	-1.61089	-1.76827	-3.47498	0.0862524	0.978434	-3.47498	-3.47498
TTHERM_001663099	HP	L2FC_CPM	0.712977	-0.0323249	0.713107	-1.77575	-0.215364	-0.57941	-1.30404	0.0678548	0.713107	-1.77575	-1.77575
TTHERM_001663099	HU	L2FC_CPM	-0.759485	1.1818	0.678327	-1.1929	-1.14658	-0.343704	-2.01549	0.130048	1.1818	-2.01549	-2.01549
TTHERM_001663099	IR	L2FC_CPM	-0.763102	0.932977	-0.835086	-0.600837	-0.83534	0.10794	0.117735	0.0547609	0.932977	-0.83534	0.932977
TTHERM_001663099	CPT	L2FC_CPM	0.077293	-0.978939	-1.2457	-0.448582	0.499689	1.58819	2.02586	0.059347	2.02586	-1.2457	2.02586
TTHERM_001663099	UV	L2FC_CPM	-1.80292	-1.77609	-1.36132	-0.982765	-0.274995	0.703602	0.691301	0.101598	0.703602	-1.80292	-1.80292
TTHERM_002653382	MMS	L2FC_CPM	-0.32397	0.0014201	0.0932444	0.19123	0.640125	-0.119254	-0.522463	0.0210812	0.640125	-0.522463	0.640125
TTHERM_002653382	HP	L2FC_CPM	-0.610293	0.0014201	0.735049	-0.248857	0.640125	-0.307106	-0.204283	0.0331844	0.735049	-0.610293	0.735049
TTHERM_002653382	HU	L2FC_CPM	0.5595	-0.412866	0.47784	0.548637	-0.138452	-0.440808	-0.375028	0.0473251	0.5595	-0.440808	0.5595
TTHERM_002653382	IR	L2FC_CPM	0.334554	-0.498104	0.487225	0.74759	0.0343643	-0.484239	0.0933864	0.0381762	0.74759	-0.498104	0.74759
TTHERM_002653382	CPT	L2FC_CPM	-0.505557	-0.0465868	-0.418891	-0.622432	-0.398171	0.178142	-0.117504	0.0141559	0.178142	-0.622432	-0.622432
TTHERM_002653382	UV	L2FC_CPM	0.0485228	-0.525083	-0.921711	0.00265044	-0.928289	0.153776	-0.107605	0.0402095	0.153776	-0.928289	-0.928289
TTHERM_00705040	MMS	L2FC_CPM	0.197475	-0.184711	-0.117064	-0.305869	-0.392961	-0.517123	-0.473186	0.0140394	0.197475	-0.517123	-0.517123
TTHERM_00705040	HP	L2FC_CPM	0.545677	0.817325	0.812942	0.148813	0.179071	-0.130938	-0.266912	0.0286012	0.817325	-0.266912	0.817325
TTHERM_00705040	HU	L2FC_CPM	0.291458	-0.0129077	-0.343041	-0.375867	-0.553112	-0.677297	-0.440205	0.0358508	0.291458	-0.677297	-0.677297
TTHERM_00705040	IR	L2FC_CPM	-0.678642	-0.250394	-0.825495	-0.449856	-0.871663	-0.62739	-0.555267	0.0196672	-0.250394	-0.871663	-0.871663
TTHERM_00705040	CPT	L2FC_CPM	0.878249	2.8551	2.0008	1.15983	1.11624	1.06833	0.395818	0.0328505	2.8551	0.395818	2.8551
TTHERM_00705040	UV	L2FC_CPM	0.561799	0.662239	-0.111796	-0.24791	0.138302	-0.127709	-0.442464	0.0342974	0.662239	-0.442464	0.662239
TTHERM_00577410	MMS	L2FC_CPM	0.812541	-0.164152	-1.05038	0.596119	0.859294	-0.0281121	-0.261109	0.0380107	0.859294	-1.05038	-1.05038
TTHERM_00577410	HP	L2FC_CPM	0.216353	0.520399	-0.755323	0.872373	1.45332	-0.305857	-1.09921	0.0619841	1.45332	-1.09921	1.45332
TTHERM_00577410	HU	L2FC_CPM	0.433604	0.50669	-0.193735	-0.127351	1.00542	-0.515472	-0.107039	0.0522761	1.00542	-0.515472	1.00542
TTHERM_00577410	IR	L2FC_CPM	-1.99431	-0.304844	0.544819	-0.809962	1.03621	-0.292452	-0.899947	0.0864214	1.03621	-1.99431	-1.99431
TTHERM_00577410	CPT	L2FC_CPM	0.542917	-1.50315	-0.755215	-0.473676	-0.239928	-0.162832	0.440412	0.0346643	0.542917	-1.50315	-1.50315
TTHERM_00577410	UV	L2FC_CPM	-0.400066	-1.19781	0.275399	-0.147894	0.146129	-0.555652	0.775932	0.0555965	0.775932	-1.19781	-1.19781
TTHERM_00601840	MMS	L2FC_CPM	0.211834	0.352346	0.252483	-0.00236029	-0.231651	-0.120945	0	0.0119963	0.352346	-0.231651	0.352346
TTHERM_00601840	HP	L2FC_CPM	0.211834	0.352346	0.252483	0.170623	0.104566	0.201479	-0.126804	0.00932391	0.352346	-0.126804	0.352346
TTHERM_00601840	HU	L2FC_CPM	-0.474808	-0.382075	-0.188952	0.328945	-0.258181	-0.687177	0.328172	0.0415622	0.328945	-0.687177	-0.687177
TTHERM_00601840	IR	L2FC_CPM	-0.801685	0.24675	0.0506398	0.24339	-0.758018	-0.246102	0.45255	0.0413857	0.45255	-0.801685	-0.801685
TTHERM_00601840	CPT	L2FC_CPM	-0.270461	0.0432131	0.426058	0.460625	-0.165814	-0.254257	-0.517403	0.0176792	0.460625	-0.517403	-0.517403
TTHERM_00601840	UV	L2FC_CPM	-0.290439	0.0119569	-0.327787	-0.498587	-0.0525171	-1.45372	-0.542637	0.0401686	0.0119569	-1.45372	-1.45372
TTHERM_01482630	MMS	L2FC_CPM	0.338024	0.340959	0.0475039	0.141188	-0.231651	-0.190334	-0.173257	0.0136988	0.340959	-0.231651	0.340959
TTHERM_01482630	HP	L2FC_CPM	0.513136	0.340959	0.274094	0.577018	0.285978	0.133789	0.0562271	0.0123173	0.577018	0.0562271	0.577018
TTHERM_01482630	HU	L2FC_CPM	0.0153219	-0.173593	0.107301	-0.501666	0.456555	-0.320822	-0.586713	0.0397654	0.456555	-0.586713	-0.586713
TTHERM_01482630	IR	L2FC_CPM	-0.800623	0.378596	-0.142726	-0.665586	-0.2748	0.198911	0.256191	0.0389108	0.378596	-0.800623	-0.800623
TTHERM_01482630	CPT	L2FC_CPM	0.174364	-0.820928	0.0306727	-0.26797	-0.522176	-0.553614	0.213577	0.0199353	0.213577	-0.820928	-0.820928
TTHERM_01482630	UV	L2FC_CPM	0	-0.161657	-0.921711	-0.805024	-0.427422	-0.0632596	0.90657	0.0514652	0.90657	-0.921711	-0.921711
TTHERM_01050360	MMS	L2FC_CPM	0.975335	0.604399	1.36559	0.0567816	0.171448	0.170486	0.953405	0.0263713	1.36559	0.0567816	1.36559
TTHERM_01050360	HP	L2FC_CPM	0.505169	0.311093	2.31286	0.605831	0.309787	0.138997	-0.250865	0.0441013	2.31286	-0.250865	2.31286
TTHERM_01050360	HU	L2FC_CPM	0.456352	0.708016	0.962666	1.552	0.772195	0.189497	0.67417	0.0371557	1.552	0.189497	1.552
TTHERM_01050360	IR	L2FC_CPM	1.39006	1.16223	0.502832	1.54129	-0.415627	0.193232	0.799377	0.0518067	1.54129	-0.415627	1.54129
TTHERM_01050360	CPT	L2FC_CPM	0.50054	-0.676297	0.842865	1.41113	1.7868	2.86256	2.10044	0.0502984	2.86256	-0.676297	2.86256
TTHERM_01050360	UV	L2FC_CPM	1.45978	-0.517197	0.000515285	0.854609	1.67483	-0.0952345	-0.297117	0.0686257	1.67483	-0.517197	1.67483
TTHERM_00559700	MMS	L2FC_CPM	0.0727012	1.70853	0.883058	1.04911	1.47698	1.22169	1.77393	0.028368	1.77393	0.0727012	1.77393
TTHERM_00559700	HP	L2FC_CPM	-0.417128	1.23667	0.86391	-0.14235	-0.156713	-0.69801	-0.720569	0.0498099	1.23667	-0.720569	1.23667
TTHERM_00559700	HU	L2FC_CPM	1.06891	1.27129	1.15121	0.547555	0.625592	1.13705	0.358722	0.0311943	1.27129	0.358722	1.27129
TTHERM_00559700	IR	L2FC_CPM	1.44684	-0.317058	-0.253861	-1.0149	-1.16902	-0.596344	-0.820355	0.0682734	1.44684	-1.16902	1.44684
TTHERM_00559700	CPT	L2FC_CPM	-1.49418	1.8565	2.27299	1.61211	1.85511	1.15899	0.928855	0.0475681	2.27299	-1.49418	2.27299
TTHERM_00559700	UV	L2FC_CPM	1.05464	1.27622	1.28804	0.149541	1.25053	0.0535428	-0.0631909	0.0453409	1.28804	-0.0631909	1.28804
TTHERM_002653519	MMS	L2FC_CPM	-0.907197	-0.367033	-0.573136	0.0961844	-1.1246	0.0477846	0.0694239	0.0290225	0.0961844	-1.1246	-1.1246
TTHERM_002653519	HP	L2FC_CPM	-0.406478	-0.347892	-0.050019	-0.911656	-1.55755	0.27958	-0.155877	0.0427218	0.27958	-1.55755	-1.55755
TTHERM_002653519	HU	L2FC_CPM	-0.27612	0.116342	0.914505	-0.0643427	0.363593	-0.135341	0.286484	0.039202	0.914505	-0.27612	0.914505
TTHERM_002653519	IR	L2FC_CPM	1.22628	1.55826	0.933698	0.439772	0.669005	0.456314	0.803354	0.0294107	1.55826	0.439772	1.55826
TTHERM_002653519	CPT	L2FC_CPM	-0.74257	-2.02572	-1.8468	-1.87575	-0.501559	0.734435	1.65434	0.0714393	1.65434	-2.02572	-2.02572
TTHERM_002653519	UV	L2FC_CPM	-0.125475	0.703549	1.34564	0.695471	1.239	1.54365	1.45086	0.0411337	1.54365	-0.125475	1.54365
TTHERM_001504069	MMS	L2FC_CPM	-0.766646	0.340959	0.259667	0.665269	-0.567344	-0.60422	-0.569497	0.0318595	0.665269	-0.766646	-0.766646
TTHERM_001504069	HP	L2FC_CPM	-0.752464	0.165514	0.481039	0.608495	-0.818006	-0.456239	-0.992474	0.0462013	0.608495	-0.992474	-0.992474
TTHERM_001504069	HU	L2FC_CPM	-0.662868	0.534448	0.810745	-1.13856	-1.39258	-1.29295	-0.198793	0.102223	0.810745	-1.39258	-1.39258
TTHERM_001504069	IR	L2FC_CPM	-0.51738	0.712939	0.27326	-0.695256	-0.797053	-1.31564	0.571095	0.0661715	0.712939	-1.31564	-1.31564
TTHERM_001504069	CPT	L2FC_CPM	-0.815688	-1.05781	-0.029314	-0.742745	0.165444	2.38451	1.78454	0.0612201	2.38451	-1.05781	2.38451
TTHERM_001504069	UV	L2FC_CPM	-1.48345	-1.47129	-1.51051	-0.984821	0.0803709	1.56928	0.281612	0.103948	1.56928	-1.51051	1.56928
TTHERM_001246669	MMS	L2FC_CPM	0.044678	0.238613	0.226853	0	0	-0.161569	0	0.00752537	0.238613	-0.161569	0.238613
TTHERM_001246669	HP	L2FC_CPM	0.044678	0.238613	0.226853	0	0.285978	0	0	0.00826372	0.285978	0	0.285978
TTHERM_001246669	HU	L2FC_CPM	-0.115851	-0.67354	0.533017	-0.469491	0.205518	0.10194	-0.377487	0.0459783	0.533017	-0.67354	-0.67354
TTHERM_001246669	IR	L2FC_CPM	0.268389	0	-0.0865767	-0.85109	0.205518	0.140888	-0.812632	0.0374386	0.268389	-0.85109	-0.85109
TTHERM_001246669	CPT	L2FC_CPM	0.19481	0	-0.365568	0.47466	-0.426119	0.436405	-0.0355559	0.0172148	0.47466	-0.426119	0.47466
TTHERM_001246669	UV	L2FC_CPM	0.19481	0	0	0.47466	0	0.436405	0.451594	0.0177677	0.47466	0	0.47466
TTHERM_00963210	MMS	L2FC_CPM	-0.317957	0.403445	-0.557506	-0.606658	-1.27668	-1.28356	-2.13217	0.0501965	0.403445	-2.13217	-2.13217
TTHERM_00963210	HP	L2FC_CPM	-0.282113	-0.224655	0.132327	-0.749922	-0.698526	-0.853382	-1.42668	0.0372499	0.132327	-1.42668	-1.42668
TTHERM_00963210	HU	L2FC_CPM	-0.111203	0.0087454	-0.781654	0.294651	-0.521893	-1.59689	-1.27957	0.083114	0.294651	-1.59689	-1.59689
TTHERM_00963210	IR	L2FC_CPM	-0.92694	-0.683239	-1.1786	-1.07702	-0.576591	-1.61075	-0.862416	0.0331521	-0.576591	-1.61075	-1.61075
TTHERM_00963210	CPT	L2FC_CPM	-0.018361	0.618517	0.451893	-0.898626	-0.558405	-0.0356488	-0.087021	0.0254715	0.618517	-0.898626	-0.898626
TTHERM_00963210	UV	L2FC_CPM	0.620713	1.14377	0.65942	0.503001	2.03508	0.609941	0.819316	0.033994	2.03508	0.503001	2.03508
TTHERM_00162860	MMS	L2FC_CPM	1.11651	0.862081	-0.107907	-0.000747291	0.190737	-0.0738132	0.57194	0.0262005	1.11651	-0.107907	1.11651
TTHERM_00162860	HP	L2FC_CPM	0.687213	0.791482	-0.14563	0.517945	-0.283642	-0.516908	-0.39952	0.0366036	0.791482	-0.516908	0.791482
TTHERM_00162860	HU	L2FC_CPM	-1.2369	0.265448	0.0828774	1.06109	0.125955	-0.907915	-0.118311	0.0798711	1.06109	-1.2369	-1.2369
TTHERM_00162860	IR	L2FC_CPM	-0.113472	-0.736754	0.303752	-0.0391873	0.147857	-0.244266	-1.07515	0.0412918	0.303752	-1.07515	-1.07515
TTHERM_00162860	CPT	L2FC_CPM	0.535227	0.798103	0.802023	0.223784	1.2371	1.64963	1.59064	0.0238315	1.64963	0.223784	1.64963
TTHERM_00162860	UV	L2FC_CPM	0.987126	0.0565232	-0.7196	-0.101366	-0.630293	-0.3594	0.553137	0.0529196	0.987126	-0.7196	0.987126
TTHERM_01138230	MMS	L2FC_CPM	0.665189	-0.451903	-1.17118	-0.243921	-1.07495	-1.06597	-1.04343	0.0372163	0.665189	-1.17118	-1.17118
TTHERM_01138230	HP	L2FC_CPM	0.742724	-0.546614	-0.188814	-0.465671	-1.08116	0.481523	-0.400248	0.0430894	0.742724	-1.08116	-1.08116
TTHERM_01138230	HU	L2FC_CPM	0.210095	0.875299	0.284399	0.588158	-0.497009	-0.0999394	-0.991274	0.0665151	0.875299	-0.991274	-0.991274
TTHERM_01138230	IR	L2FC_CPM	0.073998	-0.380846	-0.533622	-1.20998	-0.79427	0.566814	0.392743	0.0563346	0.566814	-1.20998	-1.20998
TTHERM_01138230	CPT	L2FC_CPM	0.113156	-1.04765	-0.926253	-0.0912801	-0.618657	-0.0774615	-0.411119	0.0226619	0.113156	-1.04765	-1.04765
TTHERM_01138230	UV	L2FC_CPM	-0.0525509	-0.784794	-0.416129	-1.70788	-1.15762	-0.363763	-0.18495	0.0548211	-0.0525509	-1.70788	-1.70788
TTHERM_01344670	MMS	L2FC_CPM	0.865182	-0.589153	0.528049	-0.301603	-1.18876	-1.15432	-2.19711	0.0640336	0.865182	-2.19711	-2.19711
TTHERM_01344670	HP	L2FC_CPM	0.838958	-0.609182	0.381548	-0.170108	-0.0808264	0.36125	-1.1296	0.0455532	0.838958	-1.1296	-1.1296
TTHERM_01344670	HU	L2FC_CPM	-0.392253	-0.170548	-0.103093	-0.293936	-0.882299	-0.344408	-0.915594	0.0358495	-0.103093	-0.915594	-0.915594
TTHERM_01344670	IR	L2FC_CPM	0.409553	-0.0905563	0.573154	-0.621851	-0.872119	0.0488567	-0.0301205	0.0429838	0.573154	-0.872119	-0.872119
TTHERM_01344670	CPT	L2FC_CPM	0.928997	1.40785	1.56335	2.16208	1.53347	1.21904	1.51185	0.0151105	2.16208	0.928997	2.16208
TTHERM_01344670	UV	L2FC_CPM	0.458174	0.173663	0.214084	0.388786	0.23546	-0.52657	-0.0119805	0.0248947	0.458174	-0.52657	-0.52657
TTHERM_001395377	MMS	L2FC_CPM	0	-0.0113873	0	0.216133	-0.249124	0	0	0.00632193	0.216133	-0.249124	-0.249124
TTHERM_001395377	HP	L2FC_CPM	0	-0.0113873	0.390097	0.216133	0	0	0	0.00869134	0.390097	-0.0113873	0.390097
TTHERM_001395377	HU	L2FC_CPM	-0.456941	0.0566501	1.17048	1.55269	0.0244347	0.454874	-0.714991	0.0815542	1.55269	-0.714991	1.55269
TTHERM_001395377	IR	L2FC_CPM	-0.403374	-0.5073	0.702833	0.665125	0.532616	-0.221929	-0.223126	0.0418009	0.702833	-0.5073	0.702833
TTHERM_001395377	CPT	L2FC_CPM	0	-0.148573	-0.16345	-0.407394	-0.454871	0.00235641	-0.552959	0.0110499	0.00235641	-0.552959	-0.552959
TTHERM_001395377	UV	L2FC_CPM	0	-0.429829	-0.472621	0	0	-0.48046	0.034699	0.0200906	0.034699	-0.48046	-0.48046
TTHERM_01670170	MMS	L2FC_CPM	-0.37802	-0.478688	0.485573	-0.249768	-0.00543556	-0.72389	0.0293798	0.0228136	0.485573	-0.72389	-0.72389
TTHERM_01670170	HP	L2FC_CPM	0.0410459	-0.0326052	0.229336	0.0705989	0.291721	0.131046	0.0741616	0.00745828	0.291721	-0.0326052	0.291721
TTHERM_01670170	HU	L2FC_CPM	-0.0837392	0.203966	-0.264057	0.259643	0.329502	-0.339834	-0.22207	0.0287979	0.329502	-0.339834	-0.339834
TTHERM_01670170	IR	L2FC_CPM	-0.133714	0.497797	0.445628	0.830239	-0.644624	-0.453416	1.03766	0.0516406	1.03766	-0.644624	1.03766
TTHERM_01670170	CPT	L2FC_CPM	0.32769	0.802778	-0.134657	0.234788	-0.0103341	-0.308218	-0.789713	0.0244072	0.802778	-0.789713	0.802778
TTHERM_01670170	UV	L2FC_CPM	0.205657	-0.0470669	-0.633062	-0.0557467	-0.524995	0.297911	-0.0892488	0.0292025	0.297911	-0.633062	-0.633062
TTHERM_002653390	MMS	L2FC_CPM	0.156139	-0.0947043	0.226853	-0.472218	0.601248	0.0484246	0	0.0177727	0.601248	-0.472218	0.601248
TTHERM_002653390	HP	L2FC_CPM	0.307601	-0.0498322	0.226853	0.0882524	0.350586	0.0484246	-0.40246	0.016748	0.350586	-0.40246	-0.40246
TTHERM_002653390	HU	L2FC_CPM	0.283776	1.07972	0.441474	0.186961	-0.950977	-0.518926	1.4731	0.0835965	1.4731	-0.950977	1.4731
TTHERM_002653390	IR	L2FC_CPM	0.350302	0.495322	0.0529835	0.656452	-0.0637289	-0.933379	1.09502	0.0498208	1.09502	-0.933379	1.09502
TTHERM_002653390	CPT	L2FC_CPM	0.575098	0.267222	-0.695512	0.042886	-0.00962327	-0.0821694	-0.157953	0.0182478	0.575098	-0.695512	-0.695512
TTHERM_002653390	UV	L2FC_CPM	0.269513	0.1873	-0.297538	-0.0264247	-0.121516	-0.610366	-0.120477	0.0251028	0.269513	-0.610366	-0.610366
TTHERM_00418660	MMS	L2FC_CPM	-0.215044	-2.74684	-0.540576	0.64194	1.44387	0.880516	1.51954	0.0783552	1.51954	-2.74684	-2.74684
TTHERM_00418660	HP	L2FC_CPM	-0.445742	-1.78271	0.282144	2.32683	2.52883	0.271843	1.60188	0.0975974	2.52883	-1.78271	2.52883
TTHERM_00418660	HU	L2FC_CPM	0.501341	-2.93048	-1.96479	-0.861513	-0.116903	0.173652	0.146413	0.150363	0.501341	-2.93048	-2.93048
TTHERM_00418660	IR	L2FC_CPM	0.533413	0.348633	1.36823	1.14489	0.849269	0.00490951	0.0336566	0.0402816	1.36823	0.00490951	1.36823
TTHERM_00418660	CPT	L2FC_CPM	0.270129	0.420442	0.79058	0.935153	1.23236	1.48365	1.72646	0.0242083	1.72646	0.270129	1.72646
TTHERM_00418660	UV	L2FC_CPM	0.778857	-0.487832	0.421803	1.17286	0.404289	0.368857	0.169507	0.039089	1.17286	-0.487832	1.17286
TTHERM_000549648	MMS	L2FC_CPM	0	-0.154377	0.711318	0.420855	-0.280831	0.0158329	-0.145625	0.0189311	0.711318	-0.280831	0.711318
TTHERM_000549648	HP	L2FC_CPM	0	-0.0113873	0.526577	0.343838	0.211123	0.233533	-0.354927	0.0189312	0.526577	-0.354927	0.526577
TTHERM_000549648	HU	L2FC_CPM	-0.476145	-1.25234	-0.0111263	-0.270591	-0.399064	-0.907742	0.756067	0.071428	0.756067	-1.25234	-1.25234
TTHERM_000549648	IR	L2FC_CPM	0.342105	-0.123653	0.0060045	0.35135	-0.329162	0.209574	0.856325	0.0305064	0.856325	-0.329162	0.856325
TTHERM_000549648	CPT	L2FC_CPM	0.17441	0	-0.286456	-0.302826	-0.0622247	-0.0662437	-0.700089	0.0133746	0.17441	-0.700089	-0.700089
TTHERM_000549648	UV	L2FC_CPM	0.32274	-1.44133	0.204575	-0.726572	0.2067	-1.07767	0.00295863	0.0622196	0.32274	-1.44133	-1.44133
TTHERM_002653385	MMS	L2FC_CPM	0	0	0.00248336	0	0	0	0	3.31779851509557e-05	0.00248336	0	0.00248336
TTHERM_002653385	HP	L2FC_CPM	0	0	0.00248336	0.421656	0	0	0	0.00676511	0.421656	0	0.421656
TTHERM_002653385	HU	L2FC_CPM	0	0	0	0.486386	0	0	0	0.0118628	0.486386	0	0.486386
TTHERM_002653385	IR	L2FC_CPM	0	0	0	0.486386	0	0	0	0.0093627	0.486386	0	0.486386
TTHERM_002653385	CPT	L2FC_CPM	0	0	0	0	0	0	0	0	0	0	0
TTHERM_002653385	UV	L2FC_CPM	0	0	0	0	0	0	0	0	0	0	0
TTHERM_02141639	MMS	L2FC_CPM	-0.287789	0.476351	0.129181	0.010216	0.175533	-0.443489	-0.73021	0.0237391	0.476351	-0.73021	-0.73021
TTHERM_02141639	HP	L2FC_CPM	0.729831	1.0903	0.847061	0.432568	0.583778	-0.284399	-0.3575	0.035065	1.0903	-0.3575	1.0903
TTHERM_02141639	HU	L2FC_CPM	0.346434	0.417954	0.643661	0.292046	0.000954714	-0.0484397	0.0589615	0.0251218	0.643661	-0.0484397	0.643661
TTHERM_02141639	IR	L2FC_CPM	0.422668	0.360752	0.510798	0.0611776	-0.269259	0.111455	-0.076189	0.0230117	0.510798	-0.269259	0.510798
TTHERM_02141639	CPT	L2FC_CPM	0.518063	0.0155743	0.299833	0.0984402	-0.0938447	-0.373539	-0.550725	0.0180946	0.518063	-0.550725	-0.550725
TTHERM_02141639	UV	L2FC_CPM	0.533425	-0.00910765	0.0198957	-0.0906115	-0.139916	-0.17879	-0.0791467	0.0168866	0.533425	-0.17879	0.533425
TTHERM_02094560	MMS	L2FC_CPM	0	0	0.0306509	0.173215	0	-0.511153	-0.194827	0.0112399	0.173215	-0.511153	-0.511153
TTHERM_02094560	HP	L2FC_CPM	0	0	0.0306509	0.173215	0	-0.530536	0.137146	0.0130204	0.173215	-0.530536	-0.530536
TTHERM_02094560	HU	L2FC_CPM	0	0	0.483548	-0.469491	0	0.0414557	0.523947	0.0323434	0.523947	-0.469491	0.523947
TTHERM_02094560	IR	L2FC_CPM	0	0	0.483548	0	0	0.560445	0.523947	0.020126	0.560445	0	0.560445
TTHERM_02094560	CPT	L2FC_CPM	0.175547	0	0	0.47466	0.17747	0	-0.485095	0.0129277	0.47466	-0.485095	-0.485095
TTHERM_02094560	UV	L2FC_CPM	0.396287	0	0	0.00691646	-0.984209	-0.230795	0	0.031355	0.396287	-0.984209	-0.984209
TTHERM_02105570	MMS	L2FC_CPM	0.163665	0.0128074	0	0.0533335	-0.0981109	0.0583213	-0.100819	0.00515738	0.163665	-0.100819	0.163665
TTHERM_02105570	HP	L2FC_CPM	0.352925	0.0128074	-0.259232	0.756147	-0.0395391	0.268317	-0.100819	0.0224642	0.756147	-0.259232	0.756147
TTHERM_02105570	HU	L2FC_CPM	-0.257335	0.520997	0	-0.233105	0.778856	-0.966548	0.277371	0.0600006	0.778856	-0.966548	-0.966548
TTHERM_02105570	IR	L2FC_CPM	-0.396087	-0.315913	-0.923253	-0.855494	0.609288	-0.0248824	0.476497	0.0511785	0.609288	-0.923253	-0.923253
TTHERM_02105570	CPT	L2FC_CPM	0.765212	-0.241809	0.836325	0.309979	0.19837	0.487259	0.431728	0.0166918	0.836325	-0.241809	0.836325
TTHERM_02105570	UV	L2FC_CPM	0.785673	-0.144977	0.566028	-0.198382	-0.47038	0.359669	-0.4599	0.0420662	0.785673	-0.47038	0.785673
TTHERM_01981390	MMS	L2FC_CPM	-0.19371	0.484421	-0.0163611	-0.773685	-0.275739	-0.909085	-0.0429792	0.0271307	0.484421	-0.909085	-0.909085
TTHERM_01981390	HP	L2FC_CPM	0.401988	0.901454	-0.0493738	-1.011	-0.275739	-0.306812	-0.167092	0.0400157	0.901454	-1.011	-1.011
TTHERM_01981390	HU	L2FC_CPM	-0.331403	-0.173217	0.276883	-0.396261	0.645261	0.589879	-1.2424	0.0692206	0.645261	-1.2424	-1.2424
TTHERM_01981390	IR	L2FC_CPM	0.195706	0.53432	1.50741	-0.107496	0.644005	-0.331041	-0.503258	0.0535865	1.50741	-0.503258	1.50741
TTHERM_01981390	CPT	L2FC_CPM	0.648434	0.678005	-0.424699	1.64802	-0.243407	-0.425088	-0.955045	0.0417177	1.64802	-0.955045	1.64802
TTHERM_01981390	UV	L2FC_CPM	0.273335	0.40699	-0.853106	0.276278	-0.153479	0.0154392	-0.459671	0.038279	0.40699	-0.853106	-0.853106
TTHERM_000495899	MMS	L2FC_CPM	-0.894987	0.335907	-0.462136	-0.335762	0.0715415	-0.952928	-0.00388895	0.0288788	0.335907	-0.952928	-0.952928
TTHERM_000495899	HP	L2FC_CPM	0.0595943	0.817853	-0.127536	0.340429	0.167342	0.0236421	0.505524	0.0212001	0.817853	-0.127536	0.817853
TTHERM_000495899	HU	L2FC_CPM	-0.541239	0.658014	2.05027	0.291688	-0.267462	0.0865373	-0.997911	0.0962172	2.05027	-0.997911	2.05027
TTHERM_000495899	IR	L2FC_CPM	-0.451844	0.131579	1.21589	-0.3307	0.0092763	0.0895277	-0.0474764	0.0388015	1.21589	-0.451844	1.21589
TTHERM_000495899	CPT	L2FC_CPM	0.848619	-0.247425	0.1856	0.122113	-0.800687	0.421502	-0.0630399	0.0247337	0.848619	-0.800687	0.848619
TTHERM_000495899	UV	L2FC_CPM	0.324668	-0.870956	0.245786	-0.29846	-0.0926292	0.58546	0.532483	0.0425415	0.58546	-0.870956	-0.870956
TTHERM_002653407	MMS	L2FC_CPM	-0.00811976	0.45036	0.0456833	-0.0284431	0.237186	-0.382013	-0.122059	0.0146071	0.45036	-0.382013	0.45036
TTHERM_002653407	HP	L2FC_CPM	0.258355	0.179055	0.697498	0	-0.00068002	-0.563032	0.0260298	0.0237819	0.697498	-0.563032	0.697498
TTHERM_002653407	HU	L2FC_CPM	0.212543	-0.361793	0.326025	0.364066	0.843339	0.295082	0.431246	0.0320295	0.843339	-0.361793	0.843339
TTHERM_002653407	IR	L2FC_CPM	-0.0800764	0.481143	-0.338809	0.126895	-0.0446119	-0.037138	0.312901	0.0219599	0.481143	-0.338809	0.481143
TTHERM_002653407	CPT	L2FC_CPM	1.00311	-0.510628	0.326671	0.827121	-0.338801	-0.555222	-0.540976	0.0313278	1.00311	-0.555222	1.00311
TTHERM_002653407	UV	L2FC_CPM	0.891717	-0.533519	-0.0279349	1.15972	-0.211226	-0.245022	-0.386067	0.0515401	1.15972	-0.533519	1.15972
TTHERM_001008626	MMS	L2FC_CPM	0	0.123848	0	0.139348	0.663944	-0.780021	-0.329531	0.0240887	0.663944	-0.780021	-0.780021
TTHERM_001008626	HP	L2FC_CPM	0	0.0885708	0	0.139348	0.359195	-0.0773426	-0.555102	0.0175458	0.359195	-0.555102	-0.555102
TTHERM_001008626	HU	L2FC_CPM	0	0	0.0820233	0	-0.508181	0.459574	-0.468415	0.0334297	0.459574	-0.508181	-0.508181
TTHERM_001008626	IR	L2FC_CPM	0	0	0.51463	0	-1.40858	0.459574	-0.424116	0.0498675	0.51463	-1.40858	-1.40858
TTHERM_001008626	CPT	L2FC_CPM	0	0.441786	0	0	-0.444839	0.383493	-1.0025	0.023003	0.441786	-1.0025	-1.0025
TTHERM_001008626	UV	L2FC_CPM	-0.286012	0.0301293	-0.921711	0	-0.209447	0.858608	0	0.0417078	0.858608	-0.921711	-0.921711
TTHERM_02472150	MMS	L2FC_CPM	0	0.0250646	0	0.144772	0.663068	-0.457597	-0.0819731	0.0170262	0.663068	-0.457597	0.663068
TTHERM_02472150	HP	L2FC_CPM	-0.171124	0.0250646	0	0.173215	-0.119023	-0.752277	-0.167092	0.0182597	0.173215	-0.752277	-0.752277
TTHERM_02472150	HU	L2FC_CPM	-0.456418	0	-1.14865	-0.663807	0.706555	-0.18014	0.45255	0.0706829	0.706555	-1.14865	-1.14865
TTHERM_02472150	IR	L2FC_CPM	-0.0818133	-0.688389	-0.0270125	-0.49079	0.706555	-0.503744	-0.00760513	0.0375257	0.706555	-0.688389	0.706555
TTHERM_02472150	CPT	L2FC_CPM	0.396287	0.401925	0.442706	-0.379955	-0.0137448	-0.896878	-0.171165	0.0234925	0.442706	-0.896878	-0.896878
TTHERM_02472150	UV	L2FC_CPM	0.396287	0.401925	-0.123919	-0.491469	0.191126	-0.483595	-0.890611	0.0431679	0.401925	-0.890611	-0.890611
TTHERM_01467270	MMS	L2FC_CPM	-0.666427	-2.5806	-2.25516	-2.22868	-1.76751	-0.654274	-1.23509	0.0538762	-0.654274	-2.5806	-2.5806
TTHERM_01467270	HP	L2FC_CPM	-1.06551	-1.77015	-0.456169	-0.248984	0.665145	0.397822	1.73495	0.0807617	1.73495	-1.77015	-1.77015
TTHERM_01467270	HU	L2FC_CPM	-1.64878	-1.15158	-0.9399	-0.440308	-0.799799	0.558865	0.188916	0.0920636	0.558865	-1.64878	-1.64878
TTHERM_01467270	IR	L2FC_CPM	-4.16585	-0.546427	1.03462	0.800008	0.991631	0.575454	0.803875	0.124077	1.03462	-4.16585	-4.16585
TTHERM_01467270	CPT	L2FC_CPM	-1.2351	-3.60994	-3.71183	-2.94355	-2.6835	-2.75269	-2.44048	0.0515009	-1.2351	-3.71183	-3.71183
TTHERM_01467270	UV	L2FC_CPM	-1.55673	-1.82788	-0.875615	-0.730864	-0.586742	0.0426266	0.346098	0.0758723	0.346098	-1.82788	-1.82788
TTHERM_02119600	MMS	L2FC_CPM	0.0308596	-0.142989	1.41278	0.184105	0.134382	0.0322998	-0.218503	0.0246195	1.41278	-0.218503	1.41278
TTHERM_02119600	HP	L2FC_CPM	0.532718	0.43736	0.891849	-0.275162	0.750842	-0.0286934	-0.65246	0.0377352	0.891849	-0.65246	0.891849
TTHERM_02119600	HU	L2FC_CPM	-0.779342	0.228195	0.336471	-0.954936	0.336662	0.201532	0.353499	0.0522926	0.353499	-0.954936	-0.954936
TTHERM_02119600	IR	L2FC_CPM	-0.200994	0.0851817	0.883713	-0.45508	0.2252	0.569206	0.321343	0.0364003	0.883713	-0.45508	0.883713
TTHERM_02119600	CPT	L2FC_CPM	0.705721	0	0.697909	0.477799	0.271843	-0.0928819	0.757368	0.0161085	0.757368	-0.0928819	0.757368
TTHERM_02119600	UV	L2FC_CPM	0.523405	-0.875531	0.437834	-1.4268	0.820364	0.167854	0.0785644	0.066377	0.820364	-1.4268	-1.4268
TTHERM_02525180	MMS	L2FC_CPM	0.12716	0.351966	0.414903	0.383362	0.090945	0.0803762	-0.521864	0.0161438	0.414903	-0.521864	-0.521864
TTHERM_02525180	HP	L2FC_CPM	0.336537	-0.0686622	-0.30094	-0.602427	0.375523	-0.0317456	-1.28965	0.0395277	0.375523	-1.28965	-1.28965
TTHERM_02525180	HU	L2FC_CPM	1.21205	0.899479	1.58711	1.60213	0.00584789	-0.189553	1.08543	0.0618851	1.60213	-0.189553	1.60213
TTHERM_02525180	IR	L2FC_CPM	1.63063	1.43204	1.60101	0.918814	-0.671813	0.303871	0.0858187	0.0640768	1.63063	-0.671813	1.63063
TTHERM_02525180	CPT	L2FC_CPM	-0.0889656	-0.82098	-0.241246	-0.588976	-0.18689	0.492109	0.398959	0.0234326	0.492109	-0.82098	-0.82098
TTHERM_02525180	UV	L2FC_CPM	0.222897	-0.789206	0.945855	0.849473	0.719325	1.42304	-0.00638851	0.0566385	1.42304	-0.789206	1.42304
TTHERM_002653400	MMS	L2FC_CPM	0	0	0	0	0	0	-0.24706	0.00331364	0	-0.24706	-0.24706
TTHERM_002653400	HP	L2FC_CPM	0	0	0	0	0	0	-0.24706	0.0039984	0	-0.24706	-0.24706
TTHERM_002653400	HU	L2FC_CPM	0	0	0	0	0	0	0	0	0	0	0
TTHERM_002653400	IR	L2FC_CPM	0	0	0	0	0	-0.424257	0	0.00833726	0	-0.424257	-0.424257
TTHERM_002653400	CPT	L2FC_CPM	0	0	0	0.460625	0	0	0	0.00523103	0.460625	0	0.460625
TTHERM_002653400	UV	L2FC_CPM	0	0	0	0.460625	0	0	0	0.00910928	0.460625	0	0.460625
TTHERM_01444870	MMS	L2FC_CPM	0.597771	-0.825626	-1.56756	-0.679177	-0.892196	-1.52576	-2.81053	0.064287	0.597771	-2.81053	-2.81053
TTHERM_01444870	HP	L2FC_CPM	0.231246	-0.732717	-1.60426	-0.226363	-0.72341	0.677208	-1.4352	0.0617957	0.677208	-1.60426	-1.60426
TTHERM_01444870	HU	L2FC_CPM	1.30294	0.395494	-0.0123	0.45129	-0.361867	-0.574157	-1.47301	0.092531	1.30294	-1.47301	-1.47301
TTHERM_01444870	IR	L2FC_CPM	-1.06393	0.6857	-0.824198	-1.09524	-0.4132	-0.446129	-0.763199	0.0500079	0.6857	-1.09524	-1.09524
TTHERM_01444870	CPT	L2FC_CPM	-0.974099	-1.76392	-1.08415	-2.33581	-2.52422	-2.36772	-2.83503	0.042376	-0.974099	-2.83503	-2.83503
TTHERM_01444870	UV	L2FC_CPM	0.776021	0.00798192	0.226588	-1.09985	-1.09007	-1.14592	-1.38845	0.0754706	0.776021	-1.38845	-1.38845
TTHERM_02548190	MMS	L2FC_CPM	0.49664	0.25142	-0.442509	-0.405726	0.0502686	0.194665	-0.495221	0.0222281	0.49664	-0.495221	0.49664
TTHERM_02548190	HP	L2FC_CPM	0.764916	0.25142	-0.285615	-0.405726	0.144818	0.371571	0.287215	0.0261257	0.764916	-0.405726	0.764916
TTHERM_02548190	HU	L2FC_CPM	-0.11732	0.0259152	0.674665	-0.566413	0.566677	-0.367858	-0.366896	0.0495575	0.674665	-0.566413	0.674665
TTHERM_02548190	IR	L2FC_CPM	0.292072	-0.0826847	-0.181409	-0.327206	-0.211787	0.625255	-0.301868	0.0271966	0.625255	-0.327206	0.625255
TTHERM_02548190	CPT	L2FC_CPM	-0.0634812	-0.197242	-0.318099	0.00975559	-0.296974	0.883869	1.05992	0.0251672	1.05992	-0.318099	1.05992
TTHERM_02548190	UV	L2FC_CPM	-0.00855414	-0.387253	0.0446482	-0.603972	-0.521288	0.87831	0.432333	0.045389	0.87831	-0.603972	0.87831
TTHERM_01915150	MMS	L2FC_CPM	-0.451982	0.0686804	0.479336	-0.330845	-0.366523	0.341878	-0.185291	0.0206754	0.479336	-0.451982	0.479336
TTHERM_01915150	HP	L2FC_CPM	-0.161744	0.215507	0.479336	-0.0524024	0.0792942	0.162696	-0.0307889	0.0140602	0.479336	-0.161744	0.479336
TTHERM_01915150	HU	L2FC_CPM	0.324211	0.263479	0.161724	0.422852	0.427867	-0.167049	0.538334	0.0219017	0.538334	-0.167049	0.538334
TTHERM_01915150	IR	L2FC_CPM	-0.224118	0.373677	1.24991	0.582056	-0.0692819	-1.01164	0.386972	0.055803	1.24991	-1.01164	1.24991
TTHERM_01915150	CPT	L2FC_CPM	0.527969	0.230365	0.442706	-0.479072	1.08755	1.00257	-0.438531	0.0290909	1.08755	-0.479072	1.08755
TTHERM_01915150	UV	L2FC_CPM	0.599856	-0.205434	-0.518046	-0.479128	0.142883	0.612562	-0.210425	0.039384	0.612562	-0.518046	0.612562
TTHERM_00669060	MMS	L2FC_CPM	0.239044	0.76665	0.815189	0.416484	1.20923	1.22738	2.36191	0.0338447	2.36191	0.239044	2.36191
TTHERM_00669060	HP	L2FC_CPM	0.778936	0.503218	0.67408	0.437093	0.238285	0.645895	0.537008	0.0112163	0.778936	0.238285	0.778936
TTHERM_00669060	HU	L2FC_CPM	-0.766004	0.213162	-0.178779	-0.219046	0.701247	0.56246	-0.380724	0.0555107	0.701247	-0.766004	-0.766004
TTHERM_00669060	IR	L2FC_CPM	-0.558551	2.72458	1.90569	0.9261	-0.313432	0.589472	0.0463796	0.0877913	2.72458	-0.558551	2.72458
TTHERM_00669060	CPT	L2FC_CPM	-0.691004	-1.59675	1.34286	1.55202	2.43429	3.24828	1.81493	0.0730701	3.24828	-1.59675	3.24828
TTHERM_00669060	UV	L2FC_CPM	0.104414	0.0602673	1.10153	1.46845	1.21587	1.5824	0.743611	0.0451407	1.5824	0.0602673	1.5824
TTHERM_01362500	MMS	L2FC_CPM	0.0116831	1.25123	1.65309	1.61608	1.48667	1.55677	1.31065	0.0230794	1.65309	0.0116831	1.65309
TTHERM_01362500	HP	L2FC_CPM	-0.0308501	0.425898	0.394702	0.0988684	0.0568521	0.0697564	-0.280181	0.0159494	0.425898	-0.280181	0.425898
TTHERM_01362500	HU	L2FC_CPM	0.260041	0.887263	0.435349	0.266506	0.397716	0.404051	0.57456	0.0191222	0.887263	0.260041	0.887263
TTHERM_01362500	IR	L2FC_CPM	1.87728	0.391764	-0.178715	-0.479653	-0.45707	0.145519	0.107043	0.0571626	1.87728	-0.479653	1.87728
TTHERM_01362500	CPT	L2FC_CPM	-0.366402	2.60669	2.73597	2.42167	2.20136	2.10035	1.67322	0.0371583	2.73597	-0.366402	2.73597
TTHERM_01362500	UV	L2FC_CPM	0.678779	2.83831	1.96725	1.35297	1.22956	0.773077	0.392728	0.05753	2.83831	0.392728	2.83831
TTHERM_02495170	MMS	L2FC_CPM	0.211834	-0.126152	0.283134	0	0	-0.401466	0	0.0121634	0.283134	-0.401466	-0.401466
TTHERM_02495170	HP	L2FC_CPM	0.0966349	0	0.283134	0	0	0	0	0.00555905	0.283134	0	0.283134
TTHERM_02495170	HU	L2FC_CPM	0.241454	0.278223	0.112349	0.631443	0.522195	-0.199129	-1.07404	0.0546327	0.631443	-1.07404	-1.07404
TTHERM_02495170	IR	L2FC_CPM	0.198942	0.00263025	-0.0501511	0.11847	0.658618	0	-1.04748	0.0373055	0.658618	-1.04748	-1.04748
TTHERM_02495170	CPT	L2FC_CPM	0.373574	-0.0652433	-0.353917	0.337162	1.37013	0	-0.9753	0.0335663	1.37013	-0.9753	1.37013
TTHERM_02495170	UV	L2FC_CPM	0.840839	-0.439561	-1.23141	0.266885	1.37968	0	0	0.0697044	1.37968	-1.23141	1.37968
TTHERM_01901130	MMS	L2FC_CPM	0.11716	-0.0603335	-0.00805761	0.173215	-0.0183781	0.130746	-0.025793	0.00509379	0.173215	-0.0603335	0.173215
TTHERM_01901130	HP	L2FC_CPM	0.044678	0.127411	0.226853	0.173215	0.151262	0.0534031	-0.025793	0.00589249	0.226853	-0.025793	0.226853
TTHERM_01901130	HU	L2FC_CPM	0.69582	0.0484952	0.158194	0.131139	0.285312	-1.20594	-0.529275	0.0621157	0.69582	-1.20594	-1.20594
TTHERM_01901130	IR	L2FC_CPM	0.672237	-0.0490468	-0.347654	0.79774	0.113394	-1.01543	-0.304639	0.0513886	0.79774	-1.01543	-1.01543
TTHERM_01901130	CPT	L2FC_CPM	0.194669	-0.488682	0.426058	0.556841	0.723894	0.857558	0.988265	0.0220996	0.988265	-0.488682	0.988265
TTHERM_01901130	UV	L2FC_CPM	0.194669	0.0661414	-0.0230319	0.487613	0.264447	-0.0326545	0.588259	0.0198225	0.588259	-0.0326545	0.588259
TTHERM_000790459	MMS	L2FC_CPM	0.295491	-0.104539	0.170364	0.364445	0.0970607	-0.326851	0.114067	0.0130021	0.364445	-0.326851	0.364445
TTHERM_000790459	HP	L2FC_CPM	0.186568	0.385781	0.107946	-0.050226	-0.391467	-0.196597	-0.0100451	0.0174742	0.385781	-0.391467	-0.391467
TTHERM_000790459	HU	L2FC_CPM	-0.161657	-0.112233	0.22577	-0.635122	-0.174332	0.459574	0.199346	0.0368582	0.459574	-0.635122	-0.635122
TTHERM_000790459	IR	L2FC_CPM	0.0958314	0.322966	-0.22951	0.12112	0.0109851	0.233846	-0.852049	0.0297955	0.322966	-0.852049	-0.852049
TTHERM_000790459	CPT	L2FC_CPM	0.159044	0.904168	-0.0843388	0.47466	-1.56706	-0.964841	-0.961591	0.0446851	0.904168	-1.56706	-1.56706
TTHERM_000790459	UV	L2FC_CPM	-0.180165	-0.375506	-0.496628	-0.0688527	-0.472308	-0.20845	-0.768619	0.0212351	-0.0688527	-0.768619	-0.768619
TTHERM_02650290	MMS	L2FC_CPM	0.541987	0.129464	0.144921	-0.305933	-0.441233	-1.1543	-0.565832	0.0323687	0.541987	-1.1543	-1.1543
TTHERM_02650290	HP	L2FC_CPM	0.27888	0.939917	0.934148	0.305995	0.0726364	-0.143945	-0.655877	0.0373225	0.939917	-0.655877	0.939917
TTHERM_02650290	HU	L2FC_CPM	-0.412868	0.794817	0.597139	-0.192883	0.0878277	-0.777563	-0.240486	0.0584907	0.794817	-0.777563	0.794817
TTHERM_02650290	IR	L2FC_CPM	-0.384459	0.147663	-0.0702128	-0.670031	-0.296463	-0.335925	-0.127577	0.0222193	0.147663	-0.670031	-0.670031
TTHERM_02650290	CPT	L2FC_CPM	0.312036	-1.16251	0.219901	-1.55694	0.616007	1.82262	1.65952	0.06009	1.82262	-1.55694	1.82262
TTHERM_02650290	UV	L2FC_CPM	-0.288287	-1.98013	0.129159	0.0196599	-0.0970404	0.959703	0.828421	0.0759088	0.959703	-1.98013	-1.98013
TTHERM_000525059	MMS	L2FC_CPM	0.313712	0.108152	0.153453	0.175734	0.20301	-0.387828	0.477763	0.0133985	0.477763	-0.387828	0.477763
TTHERM_000525059	HP	L2FC_CPM	0.221338	1.1739	0.0104443	-0.0280008	0.829294	-0.0841767	0.561751	0.0308753	1.1739	-0.0841767	1.1739
TTHERM_000525059	HU	L2FC_CPM	-0.0233385	0.364114	0.524013	0.463022	0.321714	-1.12095	0.343241	0.0478481	0.524013	-1.12095	-1.12095
TTHERM_000525059	IR	L2FC_CPM	0.316432	1.14824	0.576489	0.561136	-0.00608448	-0.408496	0.539223	0.0371439	1.14824	-0.408496	1.14824
TTHERM_000525059	CPT	L2FC_CPM	0.507104	-0.433842	0.366142	0.772516	-1.18992	-1.36082	-0.34677	0.041277	0.772516	-1.36082	-1.36082
TTHERM_000525059	UV	L2FC_CPM	0.737126	-1.60522	0.780087	-0.0218833	-0.406446	-0.680565	-0.506389	0.0726851	0.780087	-1.60522	-1.60522
TTHERM_01035490	MMS	L2FC_CPM	-0.175777	-1.67254	-0.350787	-0.362395	-0.9812	-0.119739	-0.336495	0.0298994	-0.119739	-1.67254	-1.67254
TTHERM_01035490	HP	L2FC_CPM	0.141565	-1.6178	-0.317946	-0.623482	-0.335004	-0.0336994	0.355591	0.0436152	0.355591	-1.6178	-1.6178
TTHERM_01035490	HU	L2FC_CPM	-0.434182	-0.731472	-0.31209	-0.0714552	-0.266321	0.232772	0.465452	0.0440013	0.465452	-0.731472	-0.731472
TTHERM_01035490	IR	L2FC_CPM	-2.85499	-2.37274	0.31515	-0.0593741	0.115222	-0.239697	-0.0113867	0.107983	0.31515	-2.85499	-2.85499
TTHERM_01035490	CPT	L2FC_CPM	-0.248233	-3.26706	-1.30129	-1.40777	-1.09071	-0.66254	-1.08171	0.0466388	-0.248233	-3.26706	-3.26706
TTHERM_01035490	UV	L2FC_CPM	-0.40609	-1.36891	-0.702191	-0.897001	-0.75511	0.0557375	0.177594	0.0505233	0.177594	-1.36891	-1.36891
TTHERM_01717400	MMS	L2FC_CPM	-0.0381659	0	0.0240936	0.216133	0	0	0	0.00360085	0.216133	-0.0381659	0.216133
TTHERM_01717400	HP	L2FC_CPM	-0.0381659	0	0.0240936	0.473695	0	0	0	0.00843136	0.473695	-0.0381659	0.473695
TTHERM_01717400	HU	L2FC_CPM	-0.200769	0.510674	-0.905	-0.748083	-0.673728	-0.0851545	0.394376	0.0617438	0.510674	-0.905	-0.905
TTHERM_01717400	IR	L2FC_CPM	0.114221	0.0353713	-0.217651	-0.734444	-0.209724	0.433835	0.46788	0.0340396	0.46788	-0.734444	-0.734444
TTHERM_01717400	CPT	L2FC_CPM	0.131931	0.410906	0.430542	0.106692	0.073881	-0.239726	-1.30131	0.025095	0.430542	-1.30131	-1.30131
TTHERM_01717400	UV	L2FC_CPM	0.59105	-0.626283	-0.53021	0.481072	-0.479924	-0.480795	-0.538887	0.0397264	0.59105	-0.626283	-0.626283
TTHERM_01496780	MMS	L2FC_CPM	-0.0325883	0.00725276	0.500946	-0.192921	0	-0.401466	-0.596266	0.0193751	0.500946	-0.596266	-0.596266
TTHERM_01496780	HP	L2FC_CPM	0.307601	0.572214	0.500946	0	0	0.172657	-0.198177	0.0189586	0.572214	-0.198177	0.572214
TTHERM_01496780	HU	L2FC_CPM	-0.145579	0.250785	-0.459478	-0.913807	-0.524315	0.296156	0.0566263	0.0489945	0.296156	-0.913807	-0.913807
TTHERM_01496780	IR	L2FC_CPM	0.887702	0.334005	0.662282	0	-0.299871	-0.543556	0.582136	0.0425479	0.887702	-0.543556	0.887702
TTHERM_01496780	CPT	L2FC_CPM	0.396287	-0.333227	0.383941	0.47466	0.487793	-0.278848	1.30112	0.024079	1.30112	-0.333227	1.30112
TTHERM_01496780	UV	L2FC_CPM	0.119011	-0.217447	-1.00631	0.256916	-0.00723854	0.906953	1.51985	0.0648596	1.51985	-1.00631	1.51985
TTHERM_001415159	MMS	L2FC_CPM	-0.543764	0.384574	0.798748	-0.301733	-0.269254	-0.556591	-0.413201	0.027403	0.798748	-0.556591	0.798748
TTHERM_001415159	HP	L2FC_CPM	-0.161744	0.531401	0.230093	-0.050226	-0.269254	-0.516467	-0.595282	0.0277771	0.531401	-0.595282	-0.595282
TTHERM_001415159	HU	L2FC_CPM	-0.257427	-0.368017	-0.707818	-0.159551	-0.0526631	-0.0378824	1.10197	0.0526218	1.10197	-0.707818	1.10197
TTHERM_001415159	IR	L2FC_CPM	0.469978	-0.177715	-0.447161	0.0925659	-0.129596	-0.0895397	0.784686	0.0334372	0.784686	-0.447161	0.784686
TTHERM_001415159	CPT	L2FC_CPM	0.264344	0.518662	0.715918	1.23724	1.24191	0.580588	0.563162	0.0161244	1.24191	0.264344	1.24191
TTHERM_001415159	UV	L2FC_CPM	0.485084	-0.789406	-0.159465	1.35188	1.05628	-0.176578	0.00656377	0.0609997	1.35188	-0.789406	1.35188
TTHERM_01055410	MMS	L2FC_CPM	0.102392	0.151015	-0.218024	0.0573121	-0.0671561	0.0551712	0.291861	0.00891418	0.291861	-0.218024	0.291861
TTHERM_01055410	HP	L2FC_CPM	-0.0222403	-0.24711	-0.47894	-0.324693	-0.329457	-0.104158	-0.656984	0.0153147	-0.0222403	-0.656984	-0.656984
TTHERM_01055410	HU	L2FC_CPM	0.251976	0.522119	0.457036	0.606188	0.742036	0.487922	0.223611	0.0175336	0.742036	0.223611	0.742036
TTHERM_01055410	IR	L2FC_CPM	0.0854263	-0.499673	-0.61058	-0.315824	-0.291856	-0.31914	-0.548578	0.0191569	0.0854263	-0.61058	-0.61058
TTHERM_01055410	CPT	L2FC_CPM	-0.803307	1.08212	1.06245	0.867955	1.06151	0.849653	0.596062	0.0243705	1.08212	-0.803307	1.08212
TTHERM_01055410	UV	L2FC_CPM	0.671199	0.817621	0.660997	0.575343	0.702423	0.0606355	-0.18572	0.0271547	0.817621	-0.18572	0.817621
TTHERM_00645780	MMS	L2FC_CPM	0.181248	0.342875	0.66294	0.577561	0.604705	0.476396	0.508588	0.00876036	0.66294	0.181248	0.66294
TTHERM_00645780	HP	L2FC_CPM	-0.146321	0.110433	-0.307831	-0.472709	-0.286911	0.0256981	0.0234022	0.0149377	0.110433	-0.472709	-0.472709
TTHERM_00645780	HU	L2FC_CPM	0.208948	0.0322741	-0.407967	-0.420836	-0.263362	-0.194859	-0.471647	0.0272535	0.208948	-0.471647	-0.471647
TTHERM_00645780	IR	L2FC_CPM	-0.456603	-0.763441	-0.981741	-0.562262	-0.388471	-0.271527	-0.617527	0.0217251	-0.271527	-0.981741	-0.981741
TTHERM_00645780	CPT	L2FC_CPM	1.12348	1.49704	0.951058	0.822337	0.772422	0.734099	0.547815	0.0133453	1.49704	0.547815	1.49704
TTHERM_00645780	UV	L2FC_CPM	0.289926	0.611987	-0.0348801	-0.206628	-0.0825419	-0.336886	-0.259057	0.0274378	0.611987	-0.336886	0.611987
TTHERM_000680599	MMS	L2FC_CPM	-0.0719913	-0.721782	0.232279	-0.263512	-0.440877	-0.261847	-0.611995	0.0189873	0.232279	-0.721782	-0.721782
TTHERM_000680599	HP	L2FC_CPM	0.105467	-0.939086	1.17012	0.00509463	0.39885	-0.0668532	0.0090271	0.0390164	1.17012	-0.939086	1.17012
TTHERM_000680599	HU	L2FC_CPM	-0.618855	-0.669365	-0.258846	-0.383511	0.331302	0.309628	0.966623	0.0624234	0.966623	-0.669365	0.966623
TTHERM_000680599	IR	L2FC_CPM	-0.398828	-0.45198	-0.34116	-0.0680817	0.87921	0.637262	0.786349	0.0465309	0.87921	-0.45198	0.87921
TTHERM_000680599	CPT	L2FC_CPM	-2.72199	0.033083	-0.175134	-0.914075	-0.752458	-0.118472	0.136082	0.0449929	0.136082	-2.72199	-2.72199
TTHERM_000680599	UV	L2FC_CPM	-0.389149	-1.36516	-0.904857	-0.813948	-0.919721	0.164635	0.0736235	0.0523199	0.164635	-1.36516	-1.36516
TTHERM_00841180	MMS	L2FC_CPM	-0.300992	0.556715	0.318638	-0.109842	0.523349	-0.0299815	-0.0179865	0.0183827	0.556715	-0.300992	0.556715
TTHERM_00841180	HP	L2FC_CPM	0.127669	1.65718	0.821793	0.150975	0.392636	-0.108189	-0.544143	0.044769	1.65718	-0.544143	1.65718
TTHERM_00841180	HU	L2FC_CPM	0.70767	0.180689	0.077507	0.011928	0.212935	-0.0690368	-0.835696	0.043849	0.70767	-0.835696	-0.835696
TTHERM_00841180	IR	L2FC_CPM	2.84336	0.315286	-0.0350659	-0.870232	-0.192355	-0.169151	-0.688878	0.0840285	2.84336	-0.870232	2.84336
TTHERM_00841180	CPT	L2FC_CPM	1.31697	1.20189	1.33247	1.25773	0.911966	0.602209	0.581553	0.0139973	1.33247	0.581553	1.33247
TTHERM_00841180	UV	L2FC_CPM	1.78882	0.757184	0.627097	0.530108	-0.080415	-0.54438	-0.440871	0.063415	1.78882	-0.54438	1.78882
TTHERM_01324740	MMS	L2FC_CPM	0.0746233	0	0.0150896	0	-0.038877	-0.2177	-0.154107	0.0056139	0.0746233	-0.2177	-0.2177
TTHERM_01324740	HP	L2FC_CPM	0.333657	0	0.196551	0	-0.038877	-0.179182	0.149181	0.0114909	0.333657	-0.179182	0.333657
TTHERM_01324740	HU	L2FC_CPM	-0.203742	-0.239676	0	0	-0.266133	0	0.479936	0.0242438	0.479936	-0.266133	0.479936
TTHERM_01324740	IR	L2FC_CPM	-1.30169	-0.424148	-0.463058	0	0	0	0.479936	0.0451872	0.479936	-1.30169	-1.30169
TTHERM_01324740	CPT	L2FC_CPM	0.396287	-0.398573	0	0	-0.491233	0.21129	-0.0321746	0.0149718	0.396287	-0.491233	-0.491233
TTHERM_01324740	UV	L2FC_CPM	0.396287	-0.445702	0	-0.450232	0	-0.0145618	0.0380803	0.0237276	0.396287	-0.450232	-0.450232
TTHERM_002653480	MMS	L2FC_CPM	0.842844	0.262807	-0.202496	-0.471364	0.274997	-0.451243	-0.525793	0.0282327	0.842844	-0.525793	0.842844
TTHERM_002653480	HP	L2FC_CPM	0.80638	0.262807	0.131862	-0.253976	0.420576	-0.00325974	-0.296644	0.025921	0.80638	-0.296644	0.80638
TTHERM_002653480	HU	L2FC_CPM	-0.416476	0.490804	-0.4825	0.881633	0.304046	0.0880676	0.286967	0.0488528	0.881633	-0.4825	0.881633
TTHERM_002653480	IR	L2FC_CPM	0.417598	-0.66669	-0.439705	0.449405	0.0621613	-0.374135	-0.472926	0.0374016	0.449405	-0.66669	-0.66669
TTHERM_002653480	CPT	L2FC_CPM	-0.0226048	-0.804823	-0.77265	-0.0635283	-0.484749	-0.078682	-1.11706	0.0217655	-0.0226048	-1.11706	-1.11706
TTHERM_002653480	UV	L2FC_CPM	0.150502	-0.849845	0	0.25285	-0.0632065	0.0823673	-0.650006	0.0345461	0.25285	-0.849845	-0.849845
TTHERM_01446960	MMS	L2FC_CPM	0.247478	0.238613	0.546687	0.0653951	-0.261859	-0.430523	0.157046	0.0182046	0.546687	-0.430523	0.546687
TTHERM_01446960	HP	L2FC_CPM	0.506512	0.723424	0.478148	0.343838	-0.261859	-0.306663	-0.208222	0.0278629	0.723424	-0.306663	0.723424
TTHERM_01446960	HU	L2FC_CPM	-0.178768	0.539073	0.961812	0	-0.923728	-1.08335	0.423868	0.0802725	0.961812	-1.08335	-1.08335
TTHERM_01446960	IR	L2FC_CPM	-0.180379	0.539073	0.324924	0	0	0.247168	-0.0641622	0.0202553	0.539073	-0.180379	0.539073
TTHERM_01446960	CPT	L2FC_CPM	0.383021	0.410906	-0.324898	-0.379955	0.0754193	-0.881106	0.184226	0.0226746	0.410906	-0.881106	-0.881106
TTHERM_01446960	UV	L2FC_CPM	0.444763	0.410906	0.430542	-0.291237	0.501538	0.040164	0.642123	0.0238197	0.642123	-0.291237	0.642123
TTHERM_01345750	MMS	L2FC_CPM	0.0681404	-1.82222	-1.31376	-1.02895	-0.925626	-0.939815	-1.12192	0.0331894	0.0681404	-1.82222	-1.82222
TTHERM_01345750	HP	L2FC_CPM	-0.0340505	-1.98078	-0.881321	-0.744004	-0.555582	0.576965	0.591166	0.0645784	0.591166	-1.98078	-1.98078
TTHERM_01345750	HU	L2FC_CPM	-0.591562	-0.803775	-0.142058	-0.0467519	-0.0754435	0.241492	0.57254	0.0497744	0.57254	-0.803775	-0.803775
TTHERM_01345750	IR	L2FC_CPM	-0.612696	0.29748	0.233972	0.442226	0.748837	0.740722	1.06475	0.0395822	1.06475	-0.612696	1.06475
TTHERM_01345750	CPT	L2FC_CPM	-1.68628	-1.21878	-1.32987	-1.5039	-1.38356	-0.805376	-0.385827	0.023401	-0.385827	-1.68628	-1.68628
TTHERM_01345750	UV	L2FC_CPM	-1.21477	-1.53545	-0.982619	-0.696106	-0.637283	-0.0555774	0.269338	0.06069	0.269338	-1.53545	-1.53545
TTHERM_01520330	MMS	L2FC_CPM	-0.147523	0.0437047	-0.209017	0.134096	0	0.277074	0.42091	0.0126926	0.42091	-0.209017	0.42091
TTHERM_01520330	HP	L2FC_CPM	-0.161744	0.0996197	0.0629467	0	0.0353157	-0.437852	0.156182	0.0127729	0.156182	-0.437852	-0.437852
TTHERM_01520330	HU	L2FC_CPM	0.427431	-0.489676	0.783707	-0.422987	0	0.454874	0.0471895	0.0483738	0.783707	-0.489676	0.783707
TTHERM_01520330	IR	L2FC_CPM	-0.00294791	-0.475302	0.783707	-0.418862	-0.984097	0.454874	0.523947	0.0531818	0.783707	-0.984097	-0.984097
TTHERM_01520330	CPT	L2FC_CPM	1.02868	-0.446263	-0.244806	-0.354636	-0.567476	0.617393	-0.315848	0.0268597	1.02868	-0.567476	1.02868
TTHERM_01520330	UV	L2FC_CPM	0.186515	0.062682	-0.0230319	0.0204464	-0.56123	0.016741	0.394548	0.0221529	0.394548	-0.56123	-0.56123
TTHERM_001276319	MMS	L2FC_CPM	-0.23397	0.0186401	-0.224106	-0.365904	-0.231651	-0.780021	-0.550347	0.0147175	0.0186401	-0.780021	-0.780021
TTHERM_001276319	HP	L2FC_CPM	-0.0825085	0	0.00248336	0	-0.0794843	0	-0.414152	0.0081118	0.00248336	-0.414152	-0.414152
TTHERM_001276319	HU	L2FC_CPM	0	0	0	-0.469491	0.472751	-0.418188	0.523947	0.0391364	0.523947	-0.469491	0.523947
TTHERM_001276319	IR	L2FC_CPM	0	-0.576586	0	0	0.738885	0	0.523947	0.0319029	0.738885	-0.576586	0.738885
TTHERM_001276319	CPT	L2FC_CPM	0	-0.148573	-0.237392	-0.370748	-0.454871	0	0.831695	0.0185225	0.831695	-0.454871	0.831695
TTHERM_001276319	UV	L2FC_CPM	0	0	0.0820549	-0.200232	-0.229924	0	0.439065	0.0170973	0.439065	-0.229924	0.439065
TTHERM_00865440	MMS	L2FC_CPM	0.0534973	0.0570729	0.502989	1.53981	0.990751	1.79486	1.21887	0.0361874	1.79486	0.0534973	1.79486
TTHERM_00865440	HP	L2FC_CPM	-0.0267798	1.11142	1.25659	2.25754	1.20334	0.933473	0.175405	0.0441264	2.25754	-0.0267798	2.25754
TTHERM_00865440	HU	L2FC_CPM	-0.429927	0.184465	0.0790704	0.472605	-0.410627	0.183629	0.526175	0.038407	0.526175	-0.429927	0.526175
TTHERM_00865440	IR	L2FC_CPM	-0.29501	0.409887	0.178343	0.661954	0.43182	0.234514	-0.0898688	0.0259916	0.661954	-0.29501	0.661954
TTHERM_00865440	CPT	L2FC_CPM	-0.71785	-0.967343	0.0236377	0.0336672	0.450384	0.545561	0.709933	0.0303824	0.709933	-0.967343	-0.967343
TTHERM_00865440	UV	L2FC_CPM	0.594759	0.249263	0.220833	0.82152	1.04525	0.863092	0.726525	0.0236733	1.04525	0.220833	1.04525
TTHERM_01310150	MMS	L2FC_CPM	0.103883	-0.270583	-1.08953	-0.449987	-1.66548	0.443158	-0.250949	0.0417586	0.443158	-1.66548	-1.66548
TTHERM_01310150	HP	L2FC_CPM	0.117579	0.350456	-1.65219	0.0164754	-0.332849	1.05199	-0.914971	0.0611359	1.05199	-1.65219	-1.65219
TTHERM_01310150	HU	L2FC_CPM	1.23797	1.28193	0.709648	1.17734	1.30847	0.713974	0.900893	0.022248	1.30847	0.709648	1.30847
TTHERM_01310150	IR	L2FC_CPM	1.64786	-1.0022	-1.54872	-1.86001	-1.17467	-1.26917	-0.994663	0.0898422	1.64786	-1.86001	-1.86001
TTHERM_01310150	CPT	L2FC_CPM	-0.202602	-0.530056	-0.341377	0.326302	1.05348	1.33892	0.591603	0.0339919	1.33892	-0.530056	1.33892
TTHERM_01310150	UV	L2FC_CPM	0.490494	0.727123	0.471558	-0.52932	0.146129	0.665601	-0.236773	0.0379	0.727123	-0.52932	0.727123
TTHERM_001128529	MMS	L2FC_CPM	0.503318	-0.224295	-0.445344	-0.907758	-1.26367	-1.08187	-2.33591	0.0549569	0.503318	-2.33591	-2.33591
TTHERM_001128529	HP	L2FC_CPM	0.955835	0.336158	0.865846	0.128053	0.02091	0.0519901	-0.768731	0.0372668	0.955835	-0.768731	0.955835
TTHERM_001128529	HU	L2FC_CPM	0.126645	0.469405	1.85891	-0.701449	-0.170957	1.07334	-0.271529	0.0849327	1.85891	-0.701449	1.85891
TTHERM_001128529	IR	L2FC_CPM	-0.12431	0.0351814	1.00283	-0.404382	0.399735	0.59645	-0.420636	0.043029	1.00283	-0.420636	1.00283
TTHERM_001128529	CPT	L2FC_CPM	0.115245	0.00794457	1.17335	-0.4552	-0.0685654	-0.31797	0.397172	0.0244775	1.17335	-0.4552	1.17335
TTHERM_001128529	UV	L2FC_CPM	1.0685	-0.252473	-0.669003	-0.38308	-0.0629958	-0.199925	0.702001	0.0502138	1.0685	-0.669003	1.0685
TTHERM_000944079	MMS	L2FC_CPM	0	0	0	0.0431492	0	0	-0.292979	0.00450844	0.0431492	-0.292979	-0.292979
TTHERM_000944079	HP	L2FC_CPM	0	0	0	-0.417427	0	0	0	0.00677741	0	-0.417427	-0.417427
TTHERM_000944079	HU	L2FC_CPM	-0.430498	0	0	0.114964	0	0.183835	0	0.0171544	0.183835	-0.430498	-0.430498
TTHERM_000944079	IR	L2FC_CPM	0	0	0	0.114964	0	0.183835	-0.424116	0.0133617	0.183835	-0.424116	-0.424116
TTHERM_000944079	CPT	L2FC_CPM	0	0	-0.113594	0	0	-0.45643	-0.722246	0.0123751	0	-0.722246	-0.722246
TTHERM_000944079	UV	L2FC_CPM	0	0	0	0	0	-0.20845	0	0.00418692	0	-0.20845	-0.20845
TTHERM_00325570	MMS	L2FC_CPM	0.00466484	-0.307277	0.15747	-0.171529	-0.131314	-0.454779	-0.317877	0.0120662	0.15747	-0.454779	-0.454779
TTHERM_00325570	HP	L2FC_CPM	0.0736682	0.517655	0.628214	0.0548704	-0.139103	-0.421488	-0.85418	0.0352005	0.628214	-0.85418	-0.85418
TTHERM_00325570	HU	L2FC_CPM	0.056304	1.02083	0.925164	0.602229	0.562867	0.190331	0.187938	0.0357483	1.02083	0.056304	1.02083
TTHERM_00325570	IR	L2FC_CPM	0.149681	0.135318	-0.7848	-0.811891	-0.750055	-0.677812	-0.523029	0.0346956	0.149681	-0.811891	-0.811891
TTHERM_00325570	CPT	L2FC_CPM	-1.19535	-0.800796	-0.404761	-0.684963	-0.69631	-0.671762	-0.623067	0.0112415	-0.404761	-1.19535	-1.19535
TTHERM_00325570	UV	L2FC_CPM	-0.10552	-0.221053	0.240816	-0.162758	-0.0206533	-0.0356878	-0.273785	0.0139919	0.240816	-0.273785	-0.273785
TTHERM_002653476	MMS	L2FC_CPM	0	0	0.00623697	0	0	0	0	8.332175562964e-05	0.00623697	0	0.00623697
TTHERM_002653476	HP	L2FC_CPM	0	0	0	0	0	0	0	0	0	0	0
TTHERM_002653476	HU	L2FC_CPM	0.268389	-0.466711	-0.432606	0.516694	0	0	0.0716391	0.036515	0.516694	-0.466711	0.516694
TTHERM_002653476	IR	L2FC_CPM	0.268389	0.282681	0	0.516694	0	0	-0.102477	0.0170848	0.516694	-0.102477	0.516694
TTHERM_002653476	CPT	L2FC_CPM	0	0	0	0.492456	0.441126	0	0	0.00887662	0.492456	0	0.492456
TTHERM_002653476	UV	L2FC_CPM	0.213988	0	-0.0763804	0.492456	0.441126	0	-0.416895	0.0261	0.492456	-0.416895	0.492456
TTHERM_01123830	MMS	L2FC_CPM	0.0259618	0.0079166	-0.272486	-0.0494326	-0.141594	-0.518332	-0.140406	0.0103558	0.0259618	-0.518332	-0.518332
TTHERM_01123830	HP	L2FC_CPM	0.252887	0.540607	0.15762	0.0607468	-0.235493	-0.396546	-0.177034	0.0220541	0.540607	-0.396546	0.540607
TTHERM_01123830	HU	L2FC_CPM	0.372903	0.274343	0.283872	0.144333	0.0532784	-0.0913576	-0.693841	0.0340544	0.372903	-0.693841	-0.693841
TTHERM_01123830	IR	L2FC_CPM	-0.398469	0.0157149	-0.132396	-0.322411	-0.418571	-0.450536	-0.535021	0.0162998	0.0157149	-0.535021	-0.535021
TTHERM_01123830	CPT	L2FC_CPM	1.59523	0.881748	0.902894	1.251	1.27636	1.28121	0.961221	0.0110355	1.59523	0.881748	1.59523
TTHERM_01123830	UV	L2FC_CPM	0.242706	0.308734	-0.557206	-0.164905	-0.349831	-0.598896	-0.357831	0.0311601	0.308734	-0.598896	-0.598896
TTHERM_00781040	MMS	L2FC_CPM	-0.564526	-0.818519	-0.345985	-0.406259	-0.469128	-0.32658	-0.736147	0.0114046	-0.32658	-0.818519	-0.818519
TTHERM_00781040	HP	L2FC_CPM	-1.31051	-2.08802	-0.942986	-0.842543	-1.02201	0.0856824	0.32163	0.0614734	0.32163	-2.08802	-2.08802
TTHERM_00781040	HU	L2FC_CPM	-0.822346	0.0532305	-0.129775	0.133167	0.415665	0.378528	0.236324	0.0402016	0.415665	-0.822346	-0.822346
TTHERM_00781040	IR	L2FC_CPM	-1.36835	0.371763	0.0204243	0.164806	0.501727	0.387633	0.304538	0.0421367	0.501727	-1.36835	-1.36835
TTHERM_00781040	CPT	L2FC_CPM	-1.77775	-1.46925	-1.5924	-1.35843	-1.45427	-1.15747	-0.915968	0.015605	-0.915968	-1.77775	-1.77775
TTHERM_00781040	UV	L2FC_CPM	-1.95899	-1.58416	-1.06788	-0.7391	-0.330682	-0.0713734	0.185019	0.0780597	0.185019	-1.95899	-1.95899
TTHERM_01143830	MMS	L2FC_CPM	-0.334811	-1.57237	-0.444406	1.9201	0.936864	0.314515	1.59713	0.0679493	1.9201	-1.57237	1.9201
TTHERM_01143830	HP	L2FC_CPM	-0.403516	-0.949282	-0.996019	0.274294	0.124669	-0.336814	0.700705	0.044639	0.700705	-0.996019	-0.996019
TTHERM_01143830	HU	L2FC_CPM	0.0695343	-0.479583	0.877915	0.257676	-0.491417	0.50382	0.660558	0.0540636	0.877915	-0.491417	0.877915
TTHERM_01143830	IR	L2FC_CPM	1.10602	0.477567	0.744939	0.0606107	-0.241229	0.518653	0.264829	0.0344529	1.10602	-0.241229	1.10602
TTHERM_01143830	CPT	L2FC_CPM	-1.4107	-2.1318	0.588384	0.938317	0.418318	0.150413	0.196092	0.0521981	0.938317	-2.1318	-2.1318
TTHERM_01143830	UV	L2FC_CPM	1.0458	0.795303	0.670153	0.597629	0.195344	-0.257427	0.340367	0.0335883	1.0458	-0.257427	1.0458
TTHERM_00968570	MMS	L2FC_CPM	0.860867	0.598081	-0.587923	0.346119	1.10519	0.919545	-0.0990283	0.0323989	1.10519	-0.587923	1.10519
TTHERM_00968570	HP	L2FC_CPM	-0.15224	-0.206323	0.0112678	0.38549	-0.247357	-0.586481	0.0294305	0.0200874	0.38549	-0.586481	-0.586481
TTHERM_00968570	HU	L2FC_CPM	-1.07861	0.372072	0.320411	0.973944	0.0945719	1.17878	0.301207	0.0667483	1.17878	-1.07861	1.17878
TTHERM_00968570	IR	L2FC_CPM	-0.810361	0.154198	0.623074	0.145386	0.220454	-0.0603435	-0.0336022	0.0325826	0.623074	-0.810361	-0.810361
TTHERM_00968570	CPT	L2FC_CPM	0.797398	0.0803212	0.00646542	0.272549	0.035194	0.18203	0.348458	0.0118828	0.797398	0.00646542	0.797398
TTHERM_00968570	UV	L2FC_CPM	-1.00139	-1.84768	-0.807223	0.172519	-0.651944	-0.837034	-0.614628	0.0537738	0.172519	-1.84768	-1.84768
TTHERM_01394310	MMS	L2FC_CPM	-0.0735394	0.15327	0.975058	0.661878	0.600116	-0.246925	0.262373	0.0239947	0.975058	-0.246925	0.975058
TTHERM_01394310	HP	L2FC_CPM	-0.378026	1.63005	0.791982	1.95286	-0.0496222	0.055812	-0.335891	0.0591058	1.95286	-0.378026	1.95286
TTHERM_01394310	HU	L2FC_CPM	-0.266628	1.90741	1.08037	0.949445	0.827793	0.282689	1.16401	0.0600763	1.90741	-0.266628	1.90741
TTHERM_01394310	IR	L2FC_CPM	1.64786	2.48562	0.0780553	-0.0329348	1.01861	0.707548	0.514535	0.0634118	2.48562	-0.0329348	2.48562
TTHERM_01394310	CPT	L2FC_CPM	0.52412	1.02267	1.85701	1.35496	0.939812	1.31449	0.940945	0.0179152	1.85701	0.52412	1.85701
TTHERM_01394310	UV	L2FC_CPM	1.84873	0.90167	1.22724	0.478117	0.531694	0.512074	0.493611	0.0348917	1.84873	0.478117	1.84873
TTHERM_01298440	MMS	L2FC_CPM	-1.25778	0.623784	0.242902	0.188621	0.207479	0.193158	-0.000948969	0.0273109	0.623784	-1.25778	-1.25778
TTHERM_01298440	HP	L2FC_CPM	-0.321648	0.0780692	0.095823	0.568152	-0.610943	0.257976	-0.00400731	0.0257238	0.568152	-0.610943	-0.610943
TTHERM_01298440	HU	L2FC_CPM	0.549131	1.37509	0.693869	0.124553	0.570357	0.12152	0.0467267	0.0417695	1.37509	0.0467267	1.37509
TTHERM_01298440	IR	L2FC_CPM	0.605381	0.949636	0.643393	0.401216	0.566776	0.851977	0.212855	0.0188718	0.949636	0.212855	0.949636
TTHERM_01298440	CPT	L2FC_CPM	-0.914602	1.34142	0.504946	0.462263	1.04696	1.22862	1.45204	0.0341623	1.45204	-0.914602	1.45204
TTHERM_01298440	UV	L2FC_CPM	0.0942538	0.813285	-0.360681	-0.0747946	-0.0205146	-0.161925	0.820469	0.0367786	0.820469	-0.360681	0.820469
TTHERM_001232199	MMS	L2FC_CPM	0.0897884	0.395461	0.0691508	-0.483454	-0.1018	0.597453	-0.228712	0.0207451	0.597453	-0.483454	0.597453
TTHERM_001232199	HP	L2FC_CPM	0.0637321	0.352346	0.0911142	0	-0.0912833	0	-0.331087	0.0132891	0.352346	-0.331087	0.352346
TTHERM_001232199	HU	L2FC_CPM	0.292841	1.22854	-0.957818	0.768611	-0.503502	0.00731541	-1.06955	0.0924901	1.22854	-1.06955	1.22854
TTHERM_001232199	IR	L2FC_CPM	-0.12844	0.28351	-0.234103	0.915662	-0.745213	-0.938079	-0.857955	0.0570992	0.915662	-0.938079	-0.938079
TTHERM_001232199	CPT	L2FC_CPM	0.0281233	0.530994	0.618297	0.0148913	-0.367392	-0.240019	-0.311347	0.0186324	0.618297	-0.367392	0.618297
TTHERM_001232199	UV	L2FC_CPM	0	1.09822	0.806233	0.15277	0.483705	0.395275	0.322176	0.0294945	1.09822	0	1.09822
TTHERM_01261780	MMS	L2FC_CPM	-0.112667	-1.39679	-1.62358	-0.936202	0.00553439	-0.805704	-0.444853	0.0385885	0.00553439	-1.62358	-1.62358
TTHERM_01261780	HP	L2FC_CPM	-0.374647	-1.27428	-0.677454	-0.604881	0.0654143	-0.58409	-0.561212	0.0271109	0.0654143	-1.27428	-1.27428
TTHERM_01261780	HU	L2FC_CPM	0.0854989	-1.009	-0.335093	-1.28296	0.420815	0.345934	0.00304588	0.0716058	0.420815	-1.28296	-1.28296
TTHERM_01261780	IR	L2FC_CPM	-0.906324	0.110082	0.190928	0.13935	0.543982	0.343629	0.852628	0.0400298	0.852628	-0.906324	-0.906324
TTHERM_01261780	CPT	L2FC_CPM	-1.15257	-0.498554	-1.53449	-1.42709	-1.92614	-1.13484	-0.962274	0.0246176	-0.498554	-1.92614	-1.92614
TTHERM_01261780	UV	L2FC_CPM	-1.80954	-1.36593	-0.00750471	-1.0338	-0.51121	0.133714	0.411743	0.0789186	0.411743	-1.80954	-1.80954
TTHERM_01110990	MMS	L2FC_CPM	1.0903	0.671945	1.96311	0.79073	1.72508	0.910837	1.44711	0.0246565	1.96311	0.671945	1.96311
TTHERM_01110990	HP	L2FC_CPM	0.733593	2.212	2.21803	1.72045	2.15337	-0.0293108	0.883102	0.0496669	2.21803	-0.0293108	2.21803
TTHERM_01110990	HU	L2FC_CPM	0.498096	1.167	1.27274	0.359829	0.694862	1.18341	0.156454	0.0404743	1.27274	0.156454	1.27274
TTHERM_01110990	IR	L2FC_CPM	1.45346	0.723338	0.537208	0.189135	-0.219224	-0.849656	-0.206782	0.0596745	1.45346	-0.849656	1.45346
TTHERM_01110990	CPT	L2FC_CPM	1.73509	0.654185	0.645011	1.74413	1.61638	2.40706	1.74562	0.0253671	2.40706	0.645011	2.40706
TTHERM_01110990	UV	L2FC_CPM	1.02088	1.28049	1.06788	1.7684	1.75083	2.21456	1.06496	0.0305416	2.21456	1.02088	2.21456
TTHERM_01390270	MMS	L2FC_CPM	-0.253321	0.00810739	-0.0612551	-0.612338	-0.514889	-1.04267	-0.106315	0.0216383	0.00810739	-1.04267	-1.04267
TTHERM_01390270	HP	L2FC_CPM	-0.612959	0.165033	-0.17119	-1.27732	-0.920076	-0.529492	-0.808338	0.0355498	0.165033	-1.27732	-1.27732
TTHERM_01390270	HU	L2FC_CPM	-0.271041	0.364604	-0.11386	-0.235763	0.0925807	-0.163156	-0.081562	0.022067	0.364604	-0.271041	0.364604
TTHERM_01390270	IR	L2FC_CPM	0.120022	0.432512	-0.779309	-0.348885	-0.484755	0.197512	-0.00933058	0.0361957	0.432512	-0.779309	-0.779309
TTHERM_01390270	CPT	L2FC_CPM	0.062121	0.55996	1.04339	0.664509	0.644539	0.443632	0.419785	0.0131677	1.04339	0.062121	1.04339
TTHERM_01390270	UV	L2FC_CPM	-0.698118	-0.760215	-0.453744	-0.168512	-0.05854	-0.00423296	0.197409	0.0324954	0.197409	-0.760215	-0.760215
TTHERM_01260670	MMS	L2FC_CPM	0.0897884	-0.23136	0	0	0	0	0	0.00430023	0.0897884	-0.23136	-0.23136
TTHERM_01260670	HP	L2FC_CPM	0.0897884	0.190442	0	0	0	-0.25867	0	0.00819557	0.190442	-0.25867	-0.25867
TTHERM_01260670	HU	L2FC_CPM	0	-0.433863	-0.432606	0	-0.217459	0	0.21788	0.0256863	0.21788	-0.433863	-0.433863
TTHERM_01260670	IR	L2FC_CPM	-0.451483	-0.475302	0	0	0.456269	0	-0.685715	0.0321658	0.456269	-0.685715	-0.685715
TTHERM_01260670	CPT	L2FC_CPM	0	0	0	0.296595	-0.268634	-0.446156	-0.910875	0.018547	0.296595	-0.910875	-0.910875
TTHERM_01260670	UV	L2FC_CPM	-0.290439	0	0	0.45399	-0.511901	0	1.03667	0.0402275	1.03667	-0.511901	1.03667
TTHERM_01511190	MMS	L2FC_CPM	0	-0.126152	-0.22659	0	0	0	-0.229484	0.00569783	0	-0.229484	-0.229484
TTHERM_01511190	HP	L2FC_CPM	0	0	0.297305	0.257562	0	0	0	0.00747725	0.297305	0	0.297305
TTHERM_01511190	HU	L2FC_CPM	0	0	-0.257777	0	-0.448767	0	0	0.0156685	0	-0.448767	-0.448767
TTHERM_01511190	IR	L2FC_CPM	-0.430379	0	0	0	0	0	-0.460155	0.0148397	0	-0.460155	-0.460155
TTHERM_01511190	CPT	L2FC_CPM	0	0	0	0	0	0	-0.517403	0.00595296	0	-0.517403	-0.517403
TTHERM_01511190	UV	L2FC_CPM	0	0	0	0	0	-0.480795	-0.483111	0.0164328	0	-0.483111	-0.483111
TTHERM_01732490	MMS	L2FC_CPM	0	0.727614	0.754274	-0.226788	0.274997	-0.540125	0	0.026609	0.754274	-0.540125	0.754274
TTHERM_01732490	HP	L2FC_CPM	0	0.603766	0.479336	-0.0338674	0.420576	0	0	0.0172023	0.603766	-0.0338674	0.603766
TTHERM_01732490	HU	L2FC_CPM	-0.430498	0.539073	0.544317	-0.448953	0.282616	0.36687	0.0563092	0.0420093	0.544317	-0.448953	0.544317
TTHERM_01732490	IR	L2FC_CPM	-0.451483	0.539073	1.05209	0	0.282616	0.433835	0.0563092	0.0370955	1.05209	-0.451483	1.05209
TTHERM_01732490	CPT	L2FC_CPM	-0.0226048	0.0585229	0.531747	-0.431927	0.258543	-0.109584	0.892123	0.0207592	0.892123	-0.431927	0.892123
TTHERM_01732490	UV	L2FC_CPM	0.436515	-0.415573	0.923594	-0.375794	-1.16367	-0.38395	0.690106	0.062341	0.923594	-1.16367	-1.16367
TTHERM_01002570	MMS	L2FC_CPM	0.0746233	0.238613	-0.308709	0	0.0955048	-0.734886	-0.303287	0.0185614	0.238613	-0.734886	-0.734886
TTHERM_01002570	HP	L2FC_CPM	0.171914	1.17266	0.654958	0.0380967	0.493912	-0.431844	-0.15246	0.0356602	1.17266	-0.431844	1.17266
TTHERM_01002570	HU	L2FC_CPM	0.0435817	-0.331435	0.386988	0.478948	-0.0280912	-0.426519	-0.22043	0.036518	0.478948	-0.426519	0.478948
TTHERM_01002570	IR	L2FC_CPM	0.193427	-0.119758	1.64458	0.787109	-0.875962	-0.00384339	0.499752	0.0611381	1.64458	-0.875962	1.64458
TTHERM_01002570	CPT	L2FC_CPM	0.242878	0.311875	0.456525	0.560682	0.14239	-0.151143	-0.68431	0.019274	0.560682	-0.68431	-0.68431
TTHERM_01002570	UV	L2FC_CPM	0.416832	0.379103	0.610002	0.294331	0.611701	0.13377	0.227958	0.0145528	0.611701	0.13377	0.611701
TTHERM_001220318	MMS	L2FC_CPM	-0.282588	0.00592332	-0.195415	-0.0602389	-0.0150124	0.146752	-0.298209	0.0094208	0.146752	-0.298209	-0.298209
TTHERM_001220318	HP	L2FC_CPM	0.542098	0.215507	-0.259232	-0.050226	0.56931	-0.127924	-0.14195	0.0222247	0.56931	-0.259232	0.56931
TTHERM_001220318	HU	L2FC_CPM	-0.277508	-0.0788916	-0.239869	1.25102	0.887687	-0.268926	-0.366671	0.0592371	1.25102	-0.366671	1.25102
TTHERM_001220318	IR	L2FC_CPM	-0.437618	-1.26797	0.30706	1.15367	0.066694	0.865393	0.317473	0.064199	1.15367	-1.26797	-1.26797
TTHERM_001220318	CPT	L2FC_CPM	0.737196	0.378849	0.311003	-0.0621544	0.00491154	0.609211	-0.811494	0.0238624	0.737196	-0.811494	-0.811494
TTHERM_001220318	UV	L2FC_CPM	0.279709	0.0543232	0.840829	0.242456	-0.291544	0.0255302	-0.488741	0.0350913	0.840829	-0.488741	0.840829
TTHERM_002653331	MMS	L2FC_CPM	0	0	0	0	0	0	0.157046	0.00209312	0.157046	0	0.157046
TTHERM_002653331	HP	L2FC_CPM	0.223944	0	0	0	0	0	0.157046	0.00525637	0.223944	0	0.223944
TTHERM_002653331	HU	L2FC_CPM	0	0	0.51463	0	-0.415547	0	0	0.0229395	0.51463	-0.415547	0.51463
TTHERM_002653331	IR	L2FC_CPM	-0.881861	0	0.108094	-0.455339	0	-0.468086	0	0.0294279	0.108094	-0.881861	-0.881861
TTHERM_002653331	CPT	L2FC_CPM	0	0	-0.41345	0	0.441126	-0.489726	-0.48715	0.0161256	0.441126	-0.489726	-0.489726
TTHERM_002653331	UV	L2FC_CPM	0	0	0	0	0.441126	0	0	0.00872759	0.441126	0	0.441126
TTHERM_01078010	MMS	L2FC_CPM	-0.543764	0	0.128697	0.0839301	-0.231651	0	-0.596266	0.0166086	0.128697	-0.596266	-0.596266
TTHERM_01078010	HP	L2FC_CPM	0	-0.172363	0	-0.00845168	0.432218	0	-0.287191	0.0134943	0.432218	-0.287191	0.432218
TTHERM_01078010	HU	L2FC_CPM	-0.108064	0.819266	1.01656	0.0411945	-0.564	-0.662335	0.00737734	0.0645361	1.01656	-0.662335	1.01656
TTHERM_01078010	IR	L2FC_CPM	0.0956779	-0.0985516	0.17932	0.0675234	-1.51835	0	-0.369366	0.0417082	0.17932	-1.51835	-1.51835
TTHERM_01078010	CPT	L2FC_CPM	0.383933	0.263229	0.394575	0.264995	0.625601	-0.0434595	0.41942	0.0090496	0.625601	-0.0434595	0.625601
TTHERM_01078010	UV	L2FC_CPM	0.0779428	-0.344129	0.210729	-0.0829817	0.186231	0.426158	0.743285	0.0285932	0.743285	-0.344129	0.743285
TTHERM_01049360	MMS	L2FC_CPM	1.77692	2.02517	0.406694	0.448587	-0.233644	0.0713793	0.978093	0.0441489	2.02517	-0.233644	2.02517
TTHERM_01049360	HP	L2FC_CPM	1.80299	2.32876	0.419136	0.843898	0.137219	-0.668357	0.223923	0.0634328	2.32876	-0.668357	2.32876
TTHERM_01049360	HU	L2FC_CPM	3.74276	0.110211	-0.470515	0.0261746	-0.00885722	-0.32107	-0.276591	0.105296	3.74276	-0.470515	3.74276
TTHERM_01049360	IR	L2FC_CPM	-0.025487	-0.577301	-0.972186	-0.0192624	-0.134524	-0.467036	-0.316492	0.0295483	-0.0192624	-0.972186	-0.972186
TTHERM_01049360	CPT	L2FC_CPM	-1.09972	-0.112816	0.351103	-0.029569	-0.591933	-1.02403	-1.2533	0.0315351	0.351103	-1.2533	-1.2533
TTHERM_01049360	UV	L2FC_CPM	-0.63552	-0.428809	-0.355672	-0.460222	-0.814471	-1.30311	-0.973879	0.032307	-0.355672	-1.30311	-1.30311
TTHERM_001363578	MMS	L2FC_CPM	-0.304459	0.452664	-0.243763	0	-0.269652	-0.28335	0.177737	0.0155375	0.452664	-0.304459	0.452664
TTHERM_001363578	HP	L2FC_CPM	0	0.400002	0	-0.237319	-0.0395391	-0.293453	0	0.0139764	0.400002	-0.293453	0.400002
TTHERM_001363578	HU	L2FC_CPM	0.0360728	-0.788264	0	-0.340938	1.14352	-0.309415	0.487314	0.0638605	1.14352	-0.788264	1.14352
TTHERM_001363578	IR	L2FC_CPM	-0.385206	-0.89945	-1.33724	0.128553	1.16282	0.209574	1.18249	0.0795443	1.18249	-1.33724	-1.33724
TTHERM_001363578	CPT	L2FC_CPM	0.133933	0	-0.612591	0.636473	-0.620958	-0.0934856	-0.788153	0.0248061	0.636473	-0.788153	-0.788153
TTHERM_001363578	UV	L2FC_CPM	0.113955	-1.19133	-0.088518	0.464383	-0.952232	-0.849033	-0.99798	0.0584375	0.464383	-1.19133	-1.19133
TTHERM_00710780	MMS	L2FC_CPM	0.0933167	-1.64337	-0.971101	-1.58434	-1.71449	-2.01151	-2.1569	0.0472707	0.0933167	-2.1569	-2.1569
TTHERM_00710780	HP	L2FC_CPM	-0.15963	-1.74698	-1.37883	0.0531631	-0.58733	-0.564886	0.142233	0.0522757	0.142233	-1.74698	-1.74698
TTHERM_00710780	HU	L2FC_CPM	0.649843	-0.917391	-0.578492	-0.467525	0.325546	1.51895	-0.635908	0.0891778	1.51895	-0.917391	1.51895
TTHERM_00710780	IR	L2FC_CPM	-1.63974	-3.00314	0.776166	0.529031	0.91194	1.37644	-0.544581	0.131677	1.37644	-3.00314	-3.00314
TTHERM_00710780	CPT	L2FC_CPM	-1.53466	-3.62715	-2.5378	-2.48604	-2.0497	-3.33943	-3.46554	0.0508512	-1.53466	-3.62715	-3.62715
TTHERM_00710780	UV	L2FC_CPM	-1.47169	-2.96327	-1.79197	-1.2662	-0.939798	-0.309662	-0.0945176	0.101569	-0.0945176	-2.96327	-2.96327
TTHERM_01692290	MMS	L2FC_CPM	-0.00659418	-0.01741	0.226853	0.268797	0.191869	-0.595459	-0.228271	0.0165743	0.268797	-0.595459	-0.595459
TTHERM_01692290	HP	L2FC_CPM	1.0232	0.258521	0.0373161	0.276359	0.191869	0.179471	0.396537	0.0178724	1.0232	0.0373161	1.0232
TTHERM_01692290	HU	L2FC_CPM	-1.36324	0.11493	0.505147	-0.322806	-0.997009	-0.919149	-0.176927	0.0777483	0.505147	-1.36324	-1.36324
TTHERM_01692290	IR	L2FC_CPM	-1.37711	1.03012	-0.181409	0.111292	-0.204767	-0.721682	0.342961	0.0641717	1.03012	-1.37711	-1.37711
TTHERM_01692290	CPT	L2FC_CPM	-0.999735	-0.212551	-0.217943	-0.562129	-0.793681	1.40307	-0.209281	0.0339586	1.40307	-0.999735	1.40307
TTHERM_01692290	UV	L2FC_CPM	-1.44517	0.162675	-0.79793	-1.14485	-0.0759644	1.34256	-0.142469	0.0819721	1.34256	-1.44517	-1.44517
TTHERM_01333140	MMS	L2FC_CPM	0.334572	-0.126152	0.426571	-0.398763	-0.0778866	0.0918778	-0.38526	0.0184484	0.426571	-0.398763	0.426571
TTHERM_01333140	HP	L2FC_CPM	0.101392	0	0.274094	-0.446193	0.355287	0.0918778	0.493781	0.0196149	0.493781	-0.446193	0.493781
TTHERM_01333140	HU	L2FC_CPM	-0.783157	-0.24705	0.350411	0.833201	0.911787	-0.482195	-0.476758	0.0702115	0.911787	-0.783157	0.911787
TTHERM_01333140	IR	L2FC_CPM	0.122149	0.243962	0.381818	0.437701	0.180432	-0.892343	-0.681471	0.0406635	0.437701	-0.892343	-0.892343
TTHERM_01333140	CPT	L2FC_CPM	-0.00610163	0.505595	0.0342119	-0.750703	-0.429831	-0.760312	0.20983	0.0239305	0.505595	-0.760312	-0.760312
TTHERM_01333140	UV	L2FC_CPM	0.396939	0.904168	0.187928	-0.450232	0.191126	-0.700631	-0.339777	0.0466971	0.904168	-0.700631	0.904168
TTHERM_01337330	MMS	L2FC_CPM	0.0158988	-0.213674	-0.246871	-0.645861	-0.983544	-0.635077	-0.569858	0.0199513	0.0158988	-0.983544	-0.983544
TTHERM_01337330	HP	L2FC_CPM	-0.394234	-0.432091	-0.230409	0.0188939	-0.679605	0.040108	-0.388523	0.018016	0.040108	-0.679605	-0.679605
TTHERM_01337330	HU	L2FC_CPM	-0.699354	-0.52969	-0.284004	-0.261261	-0.00890322	0.0807624	0.425739	0.0416948	0.425739	-0.699354	-0.699354
TTHERM_01337330	IR	L2FC_CPM	0.673262	-1.73381	-1.61188	0.200359	0.0962058	-0.294354	0.186761	0.0778724	0.673262	-1.73381	-1.73381
TTHERM_01337330	CPT	L2FC_CPM	-2.00091	-2.05039	-2.32673	-2.2684	-2.80087	-2.17828	-1.86864	0.0175989	-1.86864	-2.80087	-2.80087
TTHERM_01337330	UV	L2FC_CPM	-0.236537	-1.27281	-0.555937	-0.670239	-0.618809	-0.362879	0.390506	0.044157	0.390506	-1.27281	-1.27281
TTHERM_01546850	MMS	L2FC_CPM	0.799424	0.763815	0.971422	1.96908	0.724152	0.432998	2.04815	0.0299891	2.04815	0.432998	2.04815
TTHERM_01546850	HP	L2FC_CPM	0.945496	0.657103	-0.29787	0.114811	-0.622646	-0.460928	-0.320554	0.0395938	0.945496	-0.622646	0.945496
TTHERM_01546850	HU	L2FC_CPM	0.744663	1.35461	0.505147	0.0890618	-0.287883	-0.106659	-0.537829	0.0655415	1.35461	-0.537829	1.35461
TTHERM_01546850	IR	L2FC_CPM	0.92795	1.39156	-0.850927	-1.02483	-0.739318	-0.0424267	0.00533665	0.07551	1.39156	-1.02483	1.39156
TTHERM_01546850	CPT	L2FC_CPM	0.0853521	-1.28681	0.417312	0.450507	-0.586163	-0.0100542	-1.20322	0.0357697	0.450507	-1.28681	-1.28681
TTHERM_01546850	UV	L2FC_CPM	-0.503872	0.201981	0.256718	0.942145	-0.0482724	0.469663	-1.10447	0.0556358	0.942145	-1.10447	-1.10447
TTHERM_001093489	MMS	L2FC_CPM	-0.11178	0.611122	0.737673	0.767209	1.12263	0.947836	1.14522	0.0206094	1.14522	-0.11178	1.14522
TTHERM_001093489	HP	L2FC_CPM	-0.296943	0.242928	0.557705	1.08906	1.55877	-0.0498127	0.838365	0.0421965	1.55877	-0.296943	1.55877
TTHERM_001093489	HU	L2FC_CPM	0.893099	-0.038079	0.360318	0.177725	0.154419	0.0826349	-0.209435	0.0332572	0.893099	-0.209435	0.893099
TTHERM_001093489	IR	L2FC_CPM	1.3462	0.0362708	0.3851	0.277879	0.132425	0.122436	-0.078662	0.0316677	1.3462	-0.078662	1.3462
TTHERM_001093489	CPT	L2FC_CPM	1.98175	2.5636	1.78323	1.45884	1.54227	1.45531	1.53635	0.0151058	2.5636	1.45531	2.5636
TTHERM_001093489	UV	L2FC_CPM	3.11432	1.56708	0.160841	0.137868	0.252351	-0.215275	0.150196	0.077	3.11432	-0.215275	3.11432
TTHERM_001571179	MMS	L2FC_CPM	0	0.164304	-0.253803	-0.117727	-0.0172944	-0.459534	-0.431626	0.0134669	0.164304	-0.459534	-0.459534
TTHERM_001571179	HP	L2FC_CPM	-0.171124	0.263677	-0.0914321	-0.193601	-0.00677776	-0.0850644	-0.0557388	0.00938275	0.263677	-0.193601	0.263677
TTHERM_001571179	HU	L2FC_CPM	-0.211824	0.629854	-0.334981	0.392648	0.670675	-0.360976	0.0250762	0.0453458	0.670675	-0.360976	0.670675
TTHERM_001571179	IR	L2FC_CPM	0.152539	1.06278	0.79243	0.746263	0.0728917	-0.0786644	-0.310701	0.0401778	1.06278	-0.310701	1.06278
TTHERM_001571179	CPT	L2FC_CPM	0.307229	-0.408847	0.0285097	-0.370369	-0.398358	0.0537974	-1.06585	0.0213669	0.307229	-1.06585	-1.06585
TTHERM_001571179	UV	L2FC_CPM	0.455657	0.189543	-0.929929	-0.709213	-0.368977	0.411596	-0.981194	0.0550666	0.455657	-0.981194	-0.981194
TTHERM_000762849	MMS	L2FC_CPM	0.205541	0.603265	0.724795	-0.0527862	0.0817669	-0.206713	0.141878	0.0184105	0.724795	-0.206713	0.724795
TTHERM_000762849	HP	L2FC_CPM	0.259931	0.282081	0.807228	-0.189774	-0.00677776	-0.798954	0.234686	0.032019	0.807228	-0.798954	0.807228
TTHERM_000762849	HU	L2FC_CPM	0.82323	0.208016	0.896907	0.986262	1.56468	0.74142	-0.0617763	0.0472985	1.56468	-0.0617763	1.56468
TTHERM_000762849	IR	L2FC_CPM	0.174087	-0.409117	1.00283	0.718582	1.16486	-0.871914	-0.268611	0.0622293	1.16486	-0.871914	1.16486
TTHERM_000762849	CPT	L2FC_CPM	0.119017	-1.34581	-1.34861	-1.18349	-0.689922	-1.08269	-0.908427	0.0249555	0.119017	-1.34861	-1.34861
TTHERM_000762849	UV	L2FC_CPM	-0.213386	-0.887253	-0.867954	-0.307078	-0.521794	-0.530407	-0.860148	0.0257086	-0.213386	-0.887253	-0.887253
TTHERM_002653321	MMS	L2FC_CPM	-0.304459	0	0	0	0	-0.470881	0	0.00911324	0	-0.470881	-0.470881
TTHERM_002653321	HP	L2FC_CPM	0	0.588571	0.693545	0.507562	0.285978	-0.470881	0.665677	0.0264044	0.693545	-0.470881	0.693545
TTHERM_002653321	HU	L2FC_CPM	0	0.298269	1.05209	-0.422987	0.0600282	-0.18014	0	0.0438433	1.05209	-0.422987	1.05209
TTHERM_002653321	IR	L2FC_CPM	0	0.298269	1.05209	0	-0.862162	0	0	0.0406746	1.05209	-0.862162	1.05209
TTHERM_002653321	CPT	L2FC_CPM	0	0	0	0	0	0	0	0	0	0	0
TTHERM_002653321	UV	L2FC_CPM	0	0	-0.44909	0	0	0	0	0.00907156	0	-0.44909	-0.44909
TTHERM_00836560	MMS	L2FC_CPM	1.18145	2.8586	2.56965	2.17601	2.52249	2.54489	2.15136	0.0222306	2.8586	1.18145	2.8586
TTHERM_00836560	HP	L2FC_CPM	1.60868	1.57782	0.846613	0.516219	0.546989	0.607071	-0.317865	0.0399957	1.60868	-0.317865	1.60868
TTHERM_00836560	HU	L2FC_CPM	0.693964	0.88933	0.855184	0.905765	0.658814	0.225976	-0.258458	0.0370994	0.905765	-0.258458	0.905765
TTHERM_00836560	IR	L2FC_CPM	-0.404033	-0.620358	-0.58508	-0.364765	-0.501496	-0.630101	-1.25838	0.0234163	-0.364765	-1.25838	-1.25838
TTHERM_00836560	CPT	L2FC_CPM	3.7212	1.22276	1.11765	1.42204	1.64774	1.59798	1.97302	0.0310633	3.7212	1.11765	3.7212
TTHERM_00836560	UV	L2FC_CPM	1.05751	-0.0720062	-0.274886	-0.0880178	-0.305596	-0.808762	-0.990542	0.0540737	1.05751	-0.990542	1.05751
TTHERM_01193490	MMS	L2FC_CPM	0.245869	0.915481	0.469522	0.315643	0.288603	-0.0817474	-0.184282	0.0193214	0.915481	-0.184282	0.915481
TTHERM_01193490	HP	L2FC_CPM	0.55312	0.244232	0.0648588	-0.429816	-0.72827	-0.305935	-0.881898	0.0372553	0.55312	-0.881898	-0.881898
TTHERM_01193490	HU	L2FC_CPM	0.592683	0.431137	0.25531	0.269995	-0.0938145	-0.227658	-0.357638	0.0364497	0.592683	-0.357638	0.592683
TTHERM_01193490	IR	L2FC_CPM	0.730257	0.0290063	-0.0475987	-0.104838	-0.274755	0.0103614	-0.287449	0.0244648	0.730257	-0.287449	0.730257
TTHERM_01193490	CPT	L2FC_CPM	1.40078	1.56102	1.04679	0.735475	0.646923	0.554193	0.392679	0.0196603	1.56102	0.392679	1.56102
TTHERM_01193490	UV	L2FC_CPM	0.369846	0.226666	0.220359	0.14325	-0.0408448	0.053131	-0.414636	0.020098	0.369846	-0.414636	-0.414636
TTHERM_000684419	MMS	L2FC_CPM	0	0	0	0	0	0	0	0	0	0	0
TTHERM_000684419	HP	L2FC_CPM	0	0	0	0	0	0	0	0	0	0	0
TTHERM_000684419	HU	L2FC_CPM	0.122149	-0.788264	-0.2387	-0.422987	0.189385	0.180203	0	0.0381543	0.189385	-0.788264	-0.788264
TTHERM_000684419	IR	L2FC_CPM	-0.228054	-0.424148	-0.191118	-0.49079	-0.129596	-0.291036	-0.210155	0.0110718	-0.129596	-0.49079	-0.49079
TTHERM_000684419	CPT	L2FC_CPM	0	0	0	-0.120748	-0.71595	-0.633046	0.305179	0.0172169	0.305179	-0.71595	-0.71595
TTHERM_000684419	UV	L2FC_CPM	0	0	0	-0.467744	0	-0.909417	0.437147	0.0338914	0.437147	-0.909417	-0.909417
TTHERM_00755740	MMS	L2FC_CPM	0.598299	0.302127	-0.438726	0.776227	0.561239	0.691796	-1.27147	0.0380243	0.776227	-1.27147	-1.27147
TTHERM_00755740	HP	L2FC_CPM	0.0612	-0.158211	0.372464	-0.230496	-0.125331	0.13024	-1.37778	0.0340974	0.372464	-1.37778	-1.37778
TTHERM_00755740	HU	L2FC_CPM	-0.0166277	-0.893603	-0.391094	-0.449639	-2.05261	0.522914	0.542653	0.0989265	0.542653	-2.05261	-2.05261
TTHERM_00755740	IR	L2FC_CPM	-0.371342	0.0958767	0.111072	-0.405426	-0.990429	1.51803	1.69406	0.0774278	1.69406	-0.990429	1.69406
TTHERM_00755740	CPT	L2FC_CPM	0.536325	-0.888296	0.503829	-0.785409	-0.262681	-0.540435	-0.959281	0.0306636	0.536325	-0.959281	-0.959281
TTHERM_00755740	UV	L2FC_CPM	1.3161	-0.267155	-0.310763	-0.652283	-0.373074	0.257593	0.240989	0.0511725	1.3161	-0.652283	1.3161
TTHERM_00992640	MMS	L2FC_CPM	0.277205	0.357409	-0.209017	0	-0.0111787	0.211132	0.0672075	0.0109584	0.357409	-0.209017	0.357409
TTHERM_00992640	HP	L2FC_CPM	0.277205	0.275065	0.182788	0	0	0.211132	0.149181	0.00759569	0.277205	0	0.277205
TTHERM_00992640	HU	L2FC_CPM	0.221768	-0.000952948	-1.16511	0.591193	-0.311008	-0.0633782	0.315188	0.0567878	0.591193	-1.16511	-1.16511
TTHERM_00992640	IR	L2FC_CPM	0.0754615	2.38771	0.559071	0.750336	0.19433	-0.0700086	0.16409	0.0541574	2.38771	-0.0700086	2.38771
TTHERM_00992640	CPT	L2FC_CPM	-0.215237	0.982609	0.298395	0.559722	-0.549864	0.402696	0.856567	0.0258648	0.982609	-0.549864	0.982609
TTHERM_00992640	UV	L2FC_CPM	0.0680359	0.0389068	-0.313604	0.0273628	-0.479924	0.455987	0.8917	0.0373431	0.8917	-0.479924	0.8917
TTHERM_00464920	MMS	L2FC_CPM	0.105022	-0.0122961	-0.269208	-1.02684	-1.24959	-1.03356	-0.998894	0.0328671	0.105022	-1.24959	-1.24959
TTHERM_00464920	HP	L2FC_CPM	-0.0755477	-1.31582	-0.138323	0.164359	-0.677364	0.309427	-0.442812	0.0387781	0.309427	-1.31582	-1.31582
TTHERM_00464920	HU	L2FC_CPM	-1.19519	-0.223026	-0.194847	-0.0718385	-0.462455	0.0254896	-0.2426	0.0397348	0.0254896	-1.19519	-1.19519
TTHERM_00464920	IR	L2FC_CPM	0.488009	-0.532954	0.665347	0.0677162	-0.200505	-0.722916	-0.0606306	0.0422895	0.665347	-0.722916	-0.722916
TTHERM_00464920	CPT	L2FC_CPM	-1.14612	-1.80569	-2.16984	-3.42624	-2.94551	-1.72531	-1.66013	0.0468246	-1.14612	-3.42624	-3.42624
TTHERM_00464920	UV	L2FC_CPM	-0.681762	-0.766467	-1.30874	-0.991319	-1.42074	-0.471184	0.243611	0.0531841	0.243611	-1.42074	-1.42074
TTHERM_00237260	MMS	L2FC_CPM	1.17078	-1.24438	-0.444963	0.70959	0.23612	-0.164604	0.575689	0.0452574	1.17078	-1.24438	-1.24438
TTHERM_00237260	HP	L2FC_CPM	0.684943	-0.634638	0.664945	1.24676	1.06575	0.339135	0.880197	0.0363636	1.24676	-0.634638	1.24676
TTHERM_00237260	HU	L2FC_CPM	-1.74335	-0.706998	-0.655587	-0.299528	0.125955	0.300287	0.00304588	0.076255	0.300287	-1.74335	-1.74335
TTHERM_00237260	IR	L2FC_CPM	-0.652725	0.934913	0.00570631	0.188923	-0.311867	0.707548	1.54782	0.0602462	1.54782	-0.652725	1.54782
TTHERM_00237260	CPT	L2FC_CPM	0.766015	-0.0139211	-0.212733	1.57978	1.13488	2.34663	2.00728	0.0433435	2.34663	-0.212733	2.34663
TTHERM_00237260	UV	L2FC_CPM	-0.397628	0.747527	1.11227	0.936664	0.635883	1.37143	1.14647	0.0394821	1.37143	-0.397628	1.37143
TTHERM_01318420	MMS	L2FC_CPM	-0.214356	0	-0.20807	-0.391687	0.221359	-0.476205	-1.13902	0.024063	0.221359	-1.13902	-1.13902
TTHERM_01318420	HP	L2FC_CPM	0.132934	-0.112805	0.893526	-0.0878285	0.365128	-0.192605	-0.959845	0.0371378	0.893526	-0.959845	-0.959845
TTHERM_01318420	HU	L2FC_CPM	-0.0233385	0.397403	-0.18521	-0.187748	-0.0953574	-0.160631	0.389435	0.0249815	0.397403	-0.187748	0.397403
TTHERM_01318420	IR	L2FC_CPM	0.111119	-0.0688589	-0.117454	0.0412573	-0.679529	0.415199	0.401577	0.0291393	0.415199	-0.679529	-0.679529
TTHERM_01318420	CPT	L2FC_CPM	0.688662	-0.136391	1.86198	1.19049	0.959027	2.34681	2.16117	0.0383869	2.34681	-0.136391	2.34681
TTHERM_01318420	UV	L2FC_CPM	0.345733	-0.404143	-0.548463	-0.440838	-0.0743121	0.59308	0.493611	0.040299	0.59308	-0.548463	0.59308
TTHERM_00715640	MMS	L2FC_CPM	-0.193206	-0.0706471	-0.597443	-0.240337	-0.881509	-0.894284	-0.272144	0.0196922	-0.0706471	-0.894284	-0.894284
TTHERM_00715640	HP	L2FC_CPM	-0.240574	-0.595453	-0.316835	-0.458638	-0.633124	-0.881106	-0.282279	0.0166483	-0.240574	-0.881106	-0.881106
TTHERM_00715640	HU	L2FC_CPM	-0.361559	0.190137	0.105803	0.0110352	0.0638956	0.14835	0.1273	0.0162973	0.190137	-0.361559	-0.361559
TTHERM_00715640	IR	L2FC_CPM	-0.0509261	-0.403917	-0.254433	-0.486027	-0.277083	-0.409865	-0.342289	0.011909	-0.0509261	-0.486027	-0.486027
TTHERM_00715640	CPT	L2FC_CPM	-1.72262	-0.858404	-0.232682	-0.398329	-0.567559	-0.311813	-0.141073	0.0252351	-0.141073	-1.72262	-1.72262
TTHERM_00715640	UV	L2FC_CPM	-0.280912	-0.258762	-0.199807	-0.575973	-0.614032	-0.344598	-0.587868	0.0156774	-0.199807	-0.614032	-0.614032
TTHERM_00298220	MMS	L2FC_CPM	0.622961	4.04586	4.48124	5.09599	4.29496	4.14045	4.69352	0.0469957	5.09599	0.622961	5.09599
TTHERM_00298220	HP	L2FC_CPM	0.499728	4.15648	3.8467	3.58811	2.03244	-0.0146189	0.579349	0.0934849	4.15648	-0.0146189	4.15648
TTHERM_00298220	HU	L2FC_CPM	2.29296	2.01325	2.12241	2.35878	2.0099	2.04121	1.83955	0.0129318	2.35878	1.83955	2.35878
TTHERM_00298220	IR	L2FC_CPM	5.00884	3.75134	1.1624	0.715902	-0.0357653	0.139398	0.168889	0.12141	5.00884	-0.0357653	5.00884
TTHERM_00298220	CPT	L2FC_CPM	0.737752	3.85801	5.47746	5.80548	5.33606	5.1852	4.5604	0.0518113	5.80548	0.737752	5.80548
TTHERM_00298220	UV	L2FC_CPM	5.3911	5.51161	4.60775	4.61131	4.03539	2.77684	1.39382	0.0728541	5.51161	1.39382	5.51161
TTHERM_01266070	MMS	L2FC_CPM	0.0860928	0.666696	0.619325	0.518023	0.494235	0.444868	0.482541	0.00900433	0.666696	0.0860928	0.666696
TTHERM_01266070	HP	L2FC_CPM	-0.103559	0.193918	0.267623	0.0713687	0.0186738	0.032154	0.24402	0.00914348	0.267623	-0.103559	0.267623
TTHERM_01266070	HU	L2FC_CPM	-0.201948	0.346739	0.0935867	0.0343804	-0.051678	-0.178572	0.285691	0.0222121	0.346739	-0.201948	0.346739
TTHERM_01266070	IR	L2FC_CPM	-0.0795455	0.254224	-0.0256677	0.0894707	-0.0201888	-0.0557042	0.0443276	0.00879225	0.254224	-0.0795455	0.254224
TTHERM_01266070	CPT	L2FC_CPM	0.637137	1.17482	1.10441	0.612471	0.544198	0.196255	0.312377	0.0165571	1.17482	0.196255	1.17482
TTHERM_01266070	UV	L2FC_CPM	0.405612	0.514627	-0.0451672	-0.146637	0.21161	0.165446	0.158237	0.0190196	0.514627	-0.146637	0.514627
TTHERM_001388156	MMS	L2FC_CPM	-0.725469	0.651857	0.330638	-0.158014	-0.580293	-0.279225	-1.00156	0.0343209	0.651857	-1.00156	-1.00156
TTHERM_001388156	HP	L2FC_CPM	-0.565047	0.27371	1.30108	0.722845	-0.320652	-0.334028	-0.382832	0.0446156	1.30108	-0.565047	1.30108
TTHERM_001388156	HU	L2FC_CPM	-0.572226	1.32596	-0.632446	-1.09769	0.0981968	-0.6215	-0.118311	0.0798654	1.32596	-1.09769	1.32596
TTHERM_001388156	IR	L2FC_CPM	-0.200217	0.0496239	-0.922761	-1.61351	-0.399344	-0.720194	0.278614	0.0574134	0.278614	-1.61351	-1.61351
TTHERM_001388156	CPT	L2FC_CPM	-1.06344	-0.0330254	0.862514	-1.08795	1.17288	0.216406	0.0367341	0.0413958	1.17288	-1.08795	1.17288
TTHERM_001388156	UV	L2FC_CPM	-1.46639	-0.146967	-0.00924093	-0.302717	0.121246	0.720531	-0.66472	0.0585277	0.720531	-1.46639	-1.46639
TTHERM_001151438	MMS	L2FC_CPM	-0.0170042	-1.45248	-1.8157	-1.90334	-1.71119	-0.999258	-1.35538	0.0398007	-0.0170042	-1.90334	-1.90334
TTHERM_001151438	HP	L2FC_CPM	-0.246043	-1.71261	-1.09508	-1.29349	-1.01925	0.226672	-0.0958364	0.0539708	0.226672	-1.71261	-1.71261
TTHERM_001151438	HU	L2FC_CPM	-0.146918	-0.550212	-0.222566	-0.452669	-0.216338	-0.126052	0.0774984	0.0226011	0.0774984	-0.550212	-0.550212
TTHERM_001151438	IR	L2FC_CPM	-0.301056	-0.464449	-0.501106	-0.159675	0.111951	0.375998	0.664101	0.0364886	0.664101	-0.501106	0.664101
TTHERM_001151438	CPT	L2FC_CPM	-0.146016	-0.905648	-0.911597	-1.27208	-1.43415	-1.26114	-1.10581	0.0207911	-0.146016	-1.43415	-1.43415
TTHERM_001151438	UV	L2FC_CPM	-0.925099	-1.8304	-0.882403	-0.693892	-0.538868	-0.0819903	-0.0549582	0.0554919	-0.0549582	-1.8304	-1.8304
TTHERM_01575240	MMS	L2FC_CPM	-0.0907176	0.224222	0.492502	-0.654148	-0.140831	0.0211696	0.286493	0.0204845	0.492502	-0.654148	-0.654148
TTHERM_01575240	HP	L2FC_CPM	0.172672	0.130542	0.917281	0.227197	0.220147	0.664944	0.425757	0.0181244	0.917281	0.130542	0.917281
TTHERM_01575240	HU	L2FC_CPM	-0.033579	-0.242064	0.333078	0.0904524	-0.250631	-0.00812854	0.326188	0.0246748	0.333078	-0.250631	0.333078
TTHERM_01575240	IR	L2FC_CPM	0.268319	-0.619024	-0.197898	-0.159091	-0.14542	-0.131049	0.0270037	0.0208221	0.268319	-0.619024	-0.619024
TTHERM_01575240	CPT	L2FC_CPM	0.00405522	0.52576	-0.131147	-0.735508	-1.16276	-0.770102	-0.242921	0.0284448	0.52576	-1.16276	-1.16276
TTHERM_01575240	UV	L2FC_CPM	0.0257926	-0.235615	-0.209349	-0.581676	-0.450821	-0.0320504	0.631282	0.0326005	0.631282	-0.581676	0.631282
TTHERM_001108479	MMS	L2FC_CPM	0.122844	-0.0844231	0.0613599	0.158285	-0.000963799	-0.805919	-0.540992	0.0197805	0.158285	-0.805919	-0.805919
TTHERM_001108479	HP	L2FC_CPM	0.557515	0.242614	0.740416	0.932097	0.261826	-0.203708	0.011602	0.0265458	0.932097	-0.203708	0.932097
TTHERM_001108479	HU	L2FC_CPM	0.430243	-0.511777	0.100444	0.204361	-0.616044	0.2593	-0.335787	0.043634	0.430243	-0.616044	-0.616044
TTHERM_001108479	IR	L2FC_CPM	1.22398	0.355526	1.05583	0.422213	0.156232	0.368886	-0.308743	0.0390332	1.22398	-0.308743	1.22398
TTHERM_001108479	CPT	L2FC_CPM	0.411516	0.482928	1.0759	0.236329	0.237664	-0.529567	-0.386331	0.0251212	1.0759	-0.529567	1.0759
TTHERM_001108479	UV	L2FC_CPM	1.56595	-0.256625	0.311924	0.478314	0.065377	-0.816616	-0.43848	0.0623065	1.56595	-0.816616	1.56595
TTHERM_00657230	MMS	L2FC_CPM	0.253598	0.725107	0.459915	0.522526	0.811376	-0.101919	0.514205	0.0158919	0.811376	-0.101919	0.811376
TTHERM_00657230	HP	L2FC_CPM	0.654199	0.969983	0.30006	-0.181543	0.0273454	0.00639913	-0.0217001	0.0265108	0.969983	-0.181543	0.969983
TTHERM_00657230	HU	L2FC_CPM	0.577632	0.101895	0.257044	-0.144613	-0.0267967	-0.183682	-0.500191	0.0358715	0.577632	-0.500191	0.577632
TTHERM_00657230	IR	L2FC_CPM	-0.058776	-0.659926	0.0501329	-0.0621484	-0.0184887	-0.0980575	-0.45877	0.0203913	0.0501329	-0.659926	-0.659926
TTHERM_00657230	CPT	L2FC_CPM	2.21319	1.10581	1.27081	1.11506	1.24218	1.20112	0.931755	0.014614	2.21319	0.931755	2.21319
TTHERM_00657230	UV	L2FC_CPM	1.60857	1.24587	-0.0456756	0.1816	0.09598	-0.49241	-0.508388	0.0638852	1.60857	-0.508388	1.60857
TTHERM_002653489	MMS	L2FC_CPM	0	0.627411	-0.23491	-0.10782	0.116004	0.308321	0.0941667	0.0155497	0.627411	-0.23491	0.627411
TTHERM_002653489	HP	L2FC_CPM	-0.448067	0.627411	0	0.170623	0.365128	0.130746	-0.228123	0.0243294	0.627411	-0.448067	0.627411
TTHERM_002653489	HU	L2FC_CPM	0.107678	0.226543	-0.566941	0.337045	0.205518	0.32825	-0.374378	0.0346585	0.337045	-0.566941	-0.566941
TTHERM_002653489	IR	L2FC_CPM	0.45778	-0.593826	-0.846241	-0.432752	-0.0308696	0.782429	-0.471316	0.0494738	0.782429	-0.846241	-0.846241
TTHERM_002653489	CPT	L2FC_CPM	-0.0143563	0.0123325	0.284212	0.952306	0.460031	-0.426616	-1.06621	0.0308719	0.952306	-1.06621	-1.06621
TTHERM_002653489	UV	L2FC_CPM	0.444763	-0.618769	-0.774937	0.409191	-0.0698806	-0.521962	-0.416895	0.0426293	0.444763	-0.774937	-0.774937
TTHERM_01307920	MMS	L2FC_CPM	-0.174949	1.26697	0.589557	0.306076	0.55873	0.215605	0.222821	0.0230208	1.26697	-0.174949	1.26697
TTHERM_01307920	HP	L2FC_CPM	-0.382876	-0.721672	-1.63863	-2.05673	-2.67574	-0.987307	-1.73458	0.0683925	-0.382876	-2.67574	-2.67574
TTHERM_01307920	HU	L2FC_CPM	0.46201	0.856383	0.514796	0.37819	0.171254	0.0243744	-0.253485	0.0357131	0.856383	-0.253485	0.856383
TTHERM_01307920	IR	L2FC_CPM	-0.0760798	-0.503408	-0.408386	-0.81116	-1.0849	-0.456628	-0.458228	0.0275385	-0.0760798	-1.0849	-1.0849
TTHERM_01307920	CPT	L2FC_CPM	0.640614	-0.101941	0.36189	-0.626607	-1.26837	-1.04175	-1.75774	0.0457135	0.640614	-1.75774	-1.75774
TTHERM_01307920	UV	L2FC_CPM	1.23381	0.642419	-0.30824	-0.825746	-1.09858	-0.433227	-0.645083	0.0707975	1.23381	-1.09858	1.23381
TTHERM_01205230	MMS	L2FC_CPM	-0.058816	0.194338	0.964133	-0.0325241	0.408499	0.84017	1.81418	0.0345536	1.81418	-0.058816	1.81418
TTHERM_01205230	HP	L2FC_CPM	-0.982887	0.160022	0.678919	-0.0295475	1.09123	-0.401279	0.671103	0.0477093	1.09123	-0.982887	1.09123
TTHERM_01205230	HU	L2FC_CPM	-0.0747393	-0.185805	0.985643	0.429741	0.746705	0.849152	0.869462	0.0434583	0.985643	-0.185805	0.985643
TTHERM_01205230	IR	L2FC_CPM	1.07944	1.69377	1.63241	0.884931	0.881718	0.423533	1.18627	0.030948	1.69377	0.423533	1.69377
TTHERM_01205230	CPT	L2FC_CPM	-2.16003	-1.00222	1.47753	2.22361	1.4465	1.95398	1.57849	0.0681001	2.22361	-2.16003	2.22361
TTHERM_01205230	UV	L2FC_CPM	0.395572	1.80095	1.64571	1.94913	1.20556	1.07419	0.448781	0.0441147	1.94913	0.395572	1.94913
TTHERM_00730250	MMS	L2FC_CPM	0.598606	0.366023	0.0391832	0.415037	-0.524863	-0.153781	0.137146	0.0212419	0.598606	-0.524863	0.598606
TTHERM_00730250	HP	L2FC_CPM	0.104443	0.366023	0.0240936	0.203134	-0.355223	-0.192605	0.107882	0.0162395	0.366023	-0.355223	0.366023
TTHERM_00730250	HU	L2FC_CPM	-0.331824	0.307905	0.283408	-0.49354	0.270373	-0.290873	-0.428024	0.0372495	0.307905	-0.49354	-0.49354
TTHERM_00730250	IR	L2FC_CPM	0.175511	-0.131204	1.13078	0.00148936	1.41043	-0.183379	-0.611616	0.0561108	1.41043	-0.611616	1.41043
TTHERM_00730250	CPT	L2FC_CPM	-0.0839462	0.0278944	0.570119	0.58925	0.0893091	0.392717	0.405335	0.0126893	0.58925	-0.0839462	0.58925
TTHERM_00730250	UV	L2FC_CPM	-0.353061	-1.00929	-0.630877	-0.119963	-0.268158	0.630557	0.352	0.0490275	0.630557	-1.00929	-1.00929
TTHERM_01574220	MMS	L2FC_CPM	-0.493057	-1.20764	-0.188726	-1.7733	-0.708782	-1.14394	-0.97208	0.0327895	-0.188726	-1.7733	-1.7733
TTHERM_01574220	HP	L2FC_CPM	-0.447842	-0.17046	-0.424841	-1.34838	-1.7788	-0.14903	-0.459471	0.0429465	-0.14903	-1.7788	-1.7788
TTHERM_01574220	HU	L2FC_CPM	-0.24903	-0.40817	0.19205	-0.140171	0.552374	-0.0235155	8.95182191951172e-05	0.032256	0.552374	-0.40817	0.552374
TTHERM_01574220	IR	L2FC_CPM	-0.0156155	0.486928	-0.01292	-0.0943078	0.212114	0.474044	0.105011	0.0186363	0.486928	-0.0943078	0.486928
TTHERM_01574220	CPT	L2FC_CPM	0.301684	0.990454	1.8821	1.79248	0.891042	2.11987	1.36552	0.0279034	2.11987	0.301684	2.11987
TTHERM_01574220	UV	L2FC_CPM	-0.606958	0.565413	0.701727	0.674766	-0.0820216	0.396758	0.533248	0.0355567	0.701727	-0.606958	0.701727
TTHERM_002653347	MMS	L2FC_CPM	-1.09144	-0.124922	-0.0242845	-0.687683	-1.12547	-0.0684346	0.299896	0.0327476	0.299896	-1.12547	-1.12547
TTHERM_002653347	HP	L2FC_CPM	0.334177	-0.00932119	0.285758	0.438036	-1.52157	0.224181	-0.0526426	0.0375179	0.438036	-1.52157	-1.52157
TTHERM_002653347	HU	L2FC_CPM	0.0833886	0.888207	0.896907	-0.59769	0.337954	0.102928	-0.52117	0.0602317	0.896907	-0.59769	0.896907
TTHERM_002653347	IR	L2FC_CPM	0.719503	0.313556	0.0584305	0.155697	-0.0618672	0.630878	-0.922406	0.0417511	0.719503	-0.922406	-0.922406
TTHERM_002653347	CPT	L2FC_CPM	-0.745084	-0.0632599	-0.0300986	1.32264	1.71191	0.859388	2.02907	0.0471747	2.02907	-0.745084	2.02907
TTHERM_002653347	UV	L2FC_CPM	-0.371215	0.148376	-0.300395	0.728117	0.974133	-0.134167	0.889852	0.0464035	0.974133	-0.371215	0.974133
TTHERM_01451010	MMS	L2FC_CPM	1.59191	-0.371169	0.67634	-0.943714	0.251054	-0.805247	-0.538153	0.0506987	1.59191	-0.943714	1.59191
TTHERM_01451010	HP	L2FC_CPM	1.22412	-0.293533	0.495608	-0.221207	0.31181	-0.145876	0.174154	0.0336266	1.22412	-0.293533	1.22412
TTHERM_01451010	HU	L2FC_CPM	-0.549859	-0.942275	-0.264057	-0.267208	-0.831462	0.317734	0.17985	0.0538563	0.317734	-0.942275	-0.942275
TTHERM_01451010	IR	L2FC_CPM	0.128658	-0.196605	0.502832	0.297457	-0.78859	1.29819	-0.0502615	0.0505755	1.29819	-0.78859	1.29819
TTHERM_01451010	CPT	L2FC_CPM	-0.141324	1.63091	1.16972	0.517299	0.82133	1.30821	0.764654	0.0257345	1.63091	-0.141324	1.63091
TTHERM_01451010	UV	L2FC_CPM	-0.508719	1.04001	0.345846	0.180062	0.382497	-0.262471	0.283305	0.0393165	1.04001	-0.508719	1.04001
TTHERM_00535120	MMS	L2FC_CPM	0.516258	-0.104038	0.280651	0	-0.250905	0.0272804	0.0671605	0.0138595	0.516258	-0.250905	0.516258
TTHERM_00535120	HP	L2FC_CPM	0.335374	-0.0198516	0.327956	0.422799	0.311037	0.0272804	0.118983	0.0112395	0.422799	-0.0198516	0.422799
TTHERM_00535120	HU	L2FC_CPM	-0.289508	2.50444	1.25865	2.29	1.59457	1.45526	3.37762	0.0873805	3.37762	-0.289508	3.37762
TTHERM_00535120	IR	L2FC_CPM	2.74646	0.35499	0.573701	0.937988	-0.415159	-1.26533	0.202327	0.0915287	2.74646	-1.26533	2.74646
TTHERM_00535120	CPT	L2FC_CPM	-0.0535421	0.328077	0.417591	1.04708	1.08662	2.6802	2.61337	0.0461925	2.6802	-0.0535421	2.6802
TTHERM_00535120	UV	L2FC_CPM	-0.448424	0.696719	-0.0733598	-0.027003	0	-0.681426	-0.900429	0.0453282	0.696719	-0.900429	-0.900429
TTHERM_01435670	MMS	L2FC_CPM	-0.59894	-0.829657	-1.0286	-0.761153	-1.44763	-0.912241	-0.897479	0.0156708	-0.59894	-1.44763	-1.44763
TTHERM_01435670	HP	L2FC_CPM	-0.714238	-0.789055	-0.631152	-0.698327	-0.55506	-0.171223	-0.199975	0.0174794	-0.171223	-0.789055	-0.789055
TTHERM_01435670	HU	L2FC_CPM	-1.1812	-0.230101	-0.0740592	-0.149666	-0.0634739	-0.454744	-0.261957	0.0374562	-0.0634739	-1.1812	-1.1812
TTHERM_01435670	IR	L2FC_CPM	0.136085	-0.38989	-1.17201	-1.08891	-1.01051	-1.01719	-0.196899	0.0460577	0.136085	-1.17201	-1.17201
TTHERM_01435670	CPT	L2FC_CPM	-1.23357	-1.16584	-0.704581	0.00202433	-0.00456079	0.49503	0.301339	0.0346867	0.49503	-1.23357	-1.23357
TTHERM_01435670	UV	L2FC_CPM	-1.16576	-1.45167	-0.430648	-0.432141	-0.660013	-0.511426	-0.587144	0.0355128	-0.430648	-1.45167	-1.45167
TTHERM_00938730	MMS	L2FC_CPM	0.025394	0.487704	0.287997	1.21446	0.660347	-0.203083	-0.159072	0.0273118	1.21446	-0.203083	1.21446
TTHERM_00938730	HP	L2FC_CPM	1.27701	0.505676	0.314811	0.19343	-0.521571	-0.551769	-1.74911	0.0652461	1.27701	-1.74911	-1.74911
TTHERM_00938730	HU	L2FC_CPM	0.663955	1.06135	0.568939	0.666529	0.343007	-0.709266	-0.84371	0.0689621	1.06135	-0.84371	1.06135
TTHERM_00938730	IR	L2FC_CPM	0.874465	-0.0688993	-1.53343	-0.589652	-0.919439	-1.68093	-0.873913	0.0795276	0.874465	-1.68093	-1.68093
TTHERM_00938730	CPT	L2FC_CPM	2.02107	1.23243	1.01326	1.53012	0.474942	0.961006	0.437354	0.0246471	2.02107	0.437354	2.02107
TTHERM_00938730	UV	L2FC_CPM	1.93112	1.15626	1.23961	0.524954	0.377753	-0.0704632	-0.725556	0.0686492	1.93112	-0.725556	1.93112
TTHERM_000825069	MMS	L2FC_CPM	0.0671093	2.117	1.11385	0.74356	0.491335	0.533918	0.20656	0.033813	2.117	0.0671093	2.117
TTHERM_000825069	HP	L2FC_CPM	-0.252222	1.75044	0.860912	0.30809	-0.126943	0.12816	-1.30966	0.0620012	1.75044	-1.30966	1.75044
TTHERM_000825069	HU	L2FC_CPM	0.375714	1.04348	0.443377	0.147833	-0.0761738	-0.210645	-0.36158	0.0473962	1.04348	-0.36158	1.04348
TTHERM_000825069	IR	L2FC_CPM	-0.937833	-2.57322	-2.06793	-1.77066	-1.31564	-0.712469	-0.671392	0.077742	-0.671392	-2.57322	-2.57322
TTHERM_000825069	CPT	L2FC_CPM	-0.388276	1.11374	0.578975	0.144903	0.0932606	-0.666581	-0.351342	0.0293945	1.11374	-0.666581	1.11374
TTHERM_000825069	UV	L2FC_CPM	-0.0888217	1.26526	0.133368	0.195534	-0.0871345	-0.532649	-0.0141152	0.040375	1.26526	-0.532649	1.26526
TTHERM_001592569	MMS	L2FC_CPM	0.0545768	0.564935	-0.0470846	0.491255	-0.866637	-0.0282533	0.178335	0.0247081	0.564935	-0.866637	-0.866637
TTHERM_001592569	HP	L2FC_CPM	-0.350773	0.878831	0.126056	0.322575	-0.0395775	0.118295	0.202764	0.0235923	0.878831	-0.350773	0.878831
TTHERM_001592569	HU	L2FC_CPM	-0.20873	0.224179	0.987877	-0.0625649	1.10221	-0.816416	-1.06613	0.0865446	1.10221	-1.06613	1.10221
TTHERM_001592569	IR	L2FC_CPM	-0.424539	0.219423	0.0192846	-0.290391	0.188133	-0.096581	0.249234	0.0216414	0.249234	-0.424539	-0.424539
TTHERM_001592569	CPT	L2FC_CPM	-0.207983	0.511936	-0.0476169	-0.150646	-1.16228	1.40169	0.3407	0.0363195	1.40169	-1.16228	1.40169
TTHERM_001592569	UV	L2FC_CPM	-0.313289	0.11632	0.027917	-0.025564	-0.69136	0.0912888	-0.0819943	0.0227324	0.11632	-0.69136	-0.69136
TTHERM_000925319	MMS	L2FC_CPM	-0.639298	0.0200247	0.569379	-0.272364	-0.561725	-1.16221	-0.268546	0.0314481	0.569379	-1.16221	-1.16221
TTHERM_000925319	HP	L2FC_CPM	-0.0977448	1.22384	1.00193	-0.322967	-0.33733	-0.472894	0.44438	0.0446281	1.22384	-0.472894	1.22384
TTHERM_000925319	HU	L2FC_CPM	1.30325	1.65812	1.43767	0.834038	0.262035	-0.328146	0.140821	0.0685864	1.65812	-0.328146	1.65812
TTHERM_000925319	IR	L2FC_CPM	1.7724	-0.220531	-0.820363	-1.3607	-2.10435	-0.647818	-0.493637	0.101273	1.7724	-2.10435	-2.10435
TTHERM_000925319	CPT	L2FC_CPM	1.23826	2.06802	0.954271	1.16168	1.82342	2.08945	1.72702	0.0192629	2.08945	0.954271	2.08945
TTHERM_000925319	UV	L2FC_CPM	0.326656	1.13648	-0.0959575	0.146816	0.805487	0.173038	0.173372	0.0324196	1.13648	-0.0959575	1.13648
TTHERM_01248840	MMS	L2FC_CPM	-0.118827	-1.47509	-0.636728	0.0332345	-0.085002	0.457304	0.252218	0.0352781	0.457304	-1.47509	-1.47509
TTHERM_01248840	HP	L2FC_CPM	-0.658574	-1.59136	-0.0689197	-0.232993	-0.0677095	1.36869	0.294154	0.0598784	1.36869	-1.59136	-1.59136
TTHERM_01248840	HU	L2FC_CPM	-0.439164	-0.725624	-0.0118643	-0.448386	0.643552	-0.05004	0.289586	0.0506368	0.643552	-0.725624	-0.725624
TTHERM_01248840	IR	L2FC_CPM	-0.745717	-0.286757	0.0801794	-0.344246	0.822719	-0.406708	0.158504	0.0412889	0.822719	-0.745717	0.822719
TTHERM_01248840	CPT	L2FC_CPM	-1.55171	-1.52281	-1.22877	-1.36198	-0.582026	-0.608457	-0.966567	0.0218267	-0.582026	-1.55171	-1.55171
TTHERM_01248840	UV	L2FC_CPM	-0.806641	-0.884266	0.0211308	-1.37751	-0.197206	0.095118	0.014227	0.0506742	0.095118	-1.37751	-1.37751
TTHERM_002653421	MMS	L2FC_CPM	0.367473	0.126909	0.479336	0.448905	-0.0130042	0.341878	-0.20274	0.0139615	0.479336	-0.20274	0.479336
TTHERM_002653421	HP	L2FC_CPM	0.339788	0.377411	0.409641	0.448905	0.235458	0.341878	-0.332885	0.0141812	0.448905	-0.332885	0.448905
TTHERM_002653421	HU	L2FC_CPM	0.0351087	0.549396	1.05209	0.326634	1.01117	0.454874	0.908539	0.0357092	1.05209	0.0351087	1.05209
TTHERM_002653421	IR	L2FC_CPM	0.298043	0.034925	0.0574313	0.10926	0.579586	0.0306168	0.437223	0.0168721	0.579586	0.0306168	0.579586
TTHERM_002653421	CPT	L2FC_CPM	0.349708	0.441786	0.940241	0.159625	-0.296571	-0.741627	-0.515847	0.0288437	0.940241	-0.741627	0.940241
TTHERM_002653421	UV	L2FC_CPM	0.840909	-0.00391557	-0.0909825	0.628342	0.448131	0.027024	-0.143437	0.0310379	0.840909	-0.143437	0.840909
TTHERM_01106030	MMS	L2FC_CPM	0.398982	0.370986	0	0.494414	0.274997	-0.961492	-0.0336589	0.0247477	0.494414	-0.961492	-0.961492
TTHERM_01106030	HP	L2FC_CPM	0.502322	1.47636	1.60057	1.40493	1.68333	-1.02592	0.330891	0.0562	1.68333	-1.02592	1.68333
TTHERM_01106030	HU	L2FC_CPM	-0.0618645	-1.03684	0.963647	1.59507	0.257201	-0.156103	0.184543	0.0820522	1.59507	-1.03684	1.59507
TTHERM_01106030	IR	L2FC_CPM	0.0168222	-0.464161	1.18707	0.547955	0.0843734	-0.936267	-0.0748975	0.0550389	1.18707	-0.936267	1.18707
TTHERM_01106030	CPT	L2FC_CPM	0.48336	-1.13828	0.633391	-0.29683	-0.266453	-0.942022	0.498617	0.0346638	0.633391	-1.13828	-1.13828
TTHERM_01106030	UV	L2FC_CPM	0.705237	-2.00121	0.715368	-1.68454	-0.524995	0.0880755	1.77593	0.118229	1.77593	-2.00121	-2.00121
TTHERM_01014390	MMS	L2FC_CPM	-0.513377	0.91984	0.820453	0.715336	0.58039	0.272696	0.314726	0.0246183	0.91984	-0.513377	0.91984
TTHERM_01014390	HP	L2FC_CPM	-0.736623	-0.75652	-0.116769	0.0012406	-0.0416666	-0.331594	0.0539899	0.0233844	0.0539899	-0.75652	-0.75652
TTHERM_01014390	HU	L2FC_CPM	-0.956329	0.185706	-0.113138	0.0763693	0.160915	-0.0582006	0.459486	0.0420471	0.459486	-0.956329	-0.956329
TTHERM_01014390	IR	L2FC_CPM	-0.3133	-0.540158	-0.455336	-0.250032	-0.493595	0.029954	0.0141457	0.0199238	0.029954	-0.540158	-0.540158
TTHERM_01014390	CPT	L2FC_CPM	-1.80972	-0.839481	-0.668042	-0.852998	-0.588586	-0.755539	-0.838587	0.0171323	-0.588586	-1.80972	-1.80972
TTHERM_01014390	UV	L2FC_CPM	-0.721866	-0.150777	0.0142012	-0.192687	0.178672	-0.151519	0.171763	0.0244467	0.178672	-0.721866	-0.721866
TTHERM_00353560	MMS	L2FC_CPM	-0.192442	-0.167479	-0.152014	-0.570406	-0.665094	-0.862041	-1.9153	0.0342669	-0.152014	-1.9153	-1.9153
TTHERM_00353560	HP	L2FC_CPM	-0.661966	-1.31722	-1.04911	-1.59466	-1.67507	-0.426592	-1.98583	0.0465464	-0.426592	-1.98583	-1.98583
TTHERM_00353560	HU	L2FC_CPM	-0.337973	0.144622	-0.201639	-0.490185	-0.766965	-0.703624	-0.778378	0.0386592	0.144622	-0.778378	-0.778378
TTHERM_00353560	IR	L2FC_CPM	-0.144497	-0.480151	-0.776717	-1.01323	-1.26512	-0.512571	-0.744822	0.034283	-0.144497	-1.26512	-1.26512
TTHERM_00353560	CPT	L2FC_CPM	-1.03164	-0.431676	-0.46417	-0.543247	-0.798652	-0.707678	-0.853356	0.0115354	-0.431676	-1.03164	-1.03164
TTHERM_00353560	UV	L2FC_CPM	-0.419241	-0.111706	0.00606556	-0.243356	-0.263019	-0.130674	-0.228626	0.0116459	0.00606556	-0.419241	-0.419241
TTHERM_01084100	MMS	L2FC_CPM	-0.218446	-0.941265	-0.0857488	0.129716	-0.611062	-0.949557	-0.372847	0.0249755	0.129716	-0.949557	-0.949557
TTHERM_01084100	HP	L2FC_CPM	-0.339445	-0.46981	-0.349234	-0.0662089	0.0153503	0.164449	1.10071	0.0326865	1.10071	-0.46981	1.10071
TTHERM_01084100	HU	L2FC_CPM	-0.90671	-0.224716	-0.505103	-0.420502	-0.238326	-0.447707	-0.256039	0.02501	-0.224716	-0.90671	-0.90671
TTHERM_01084100	IR	L2FC_CPM	0.209195	0.744032	0.160354	0.301794	0.239565	-0.0953888	-0.025444	0.0203865	0.744032	-0.0953888	0.744032
TTHERM_01084100	CPT	L2FC_CPM	0.0833141	0.250978	-0.264266	-0.463172	-0.326177	-0.693087	-0.372716	0.0157373	0.250978	-0.693087	-0.693087
TTHERM_01084100	UV	L2FC_CPM	-0.932706	-0.0201236	0.300252	0.158752	0.217742	0.0690398	0.0162487	0.0288924	0.300252	-0.932706	-0.932706
TTHERM_001422369	MMS	L2FC_CPM	0.239039	0.633495	0	0.173215	0.409379	0	-0.0819731	0.013971	0.633495	-0.0819731	0.633495
TTHERM_001422369	HP	L2FC_CPM	0.212096	0.776485	0.342792	0.173215	0.158717	-0.0773426	0.0309719	0.0168766	0.776485	-0.0773426	0.776485
TTHERM_001422369	HU	L2FC_CPM	0.518389	-0.625271	0.541937	0	-0.0519123	-0.893345	-0.941749	0.0679736	0.541937	-0.941749	-0.941749
TTHERM_001422369	IR	L2FC_CPM	-0.7279	0.196985	-0.780185	-0.673017	-0.952309	-0.693813	0.0284335	0.0361737	0.196985	-0.952309	-0.952309
TTHERM_001422369	CPT	L2FC_CPM	-0.241201	0.904168	0.163197	0.0216305	0.218887	0.246665	-0.802998	0.0238118	0.904168	-0.802998	0.904168
TTHERM_001422369	UV	L2FC_CPM	-0.290439	0.458466	-0.221714	-0.944596	-0.81123	-0.010283	-0.54058	0.0432215	0.458466	-0.944596	-0.944596
TTHERM_00727490	MMS	L2FC_CPM	-0.354788	-0.605649	0.248431	-0.0926027	-0.142833	-0.193446	-0.329929	0.0149217	0.248431	-0.605649	-0.605649
TTHERM_00727490	HP	L2FC_CPM	-0.00796264	-2.12421	-0.892706	-1.22822	-0.499548	-0.142087	-0.0189455	0.056307	-0.00796264	-2.12421	-2.12421
TTHERM_00727490	HU	L2FC_CPM	-0.525072	-0.48967	-0.234477	-0.0928716	-0.180693	0.312711	0.271212	0.0353916	0.312711	-0.525072	-0.525072
TTHERM_00727490	IR	L2FC_CPM	-1.53247	-0.202184	0.428144	0.00868075	0.457806	0.365657	0.249937	0.0494814	0.457806	-1.53247	-1.53247
TTHERM_00727490	CPT	L2FC_CPM	-1.9092	-2.1416	-1.27532	-1.07604	-0.972147	-1.00684	-0.994739	0.0244004	-0.972147	-2.1416	-2.1416
TTHERM_00727490	UV	L2FC_CPM	-2.4487	-1.47653	-0.752946	-0.782019	-0.459925	0.0739632	0.300828	0.0893155	0.300828	-2.4487	-2.4487
TTHERM_01500960	MMS	L2FC_CPM	0.29873	0.507343	0.409291	0.469866	0.732342	-0.108099	-0.225772	0.0184459	0.732342	-0.225772	0.732342
TTHERM_01500960	HP	L2FC_CPM	0.384466	1.05992	0.250946	-0.223441	0.230084	0.100932	-0.336188	0.0290235	1.05992	-0.336188	1.05992
TTHERM_01500960	HU	L2FC_CPM	0.47969	-0.570074	-0.4321	-0.0713337	0.11006	-0.0934863	-1.20083	0.0587658	0.47969	-1.20083	-1.20083
TTHERM_01500960	IR	L2FC_CPM	-0.120359	-0.258043	-0.426374	0.194119	0.0659433	-0.712351	-0.52785	0.0284859	0.194119	-0.712351	-0.712351
TTHERM_01500960	CPT	L2FC_CPM	0.404394	0.901925	0	-0.128292	-0.523782	-0.345614	-0.0500028	0.0224147	0.901925	-0.523782	0.901925
TTHERM_01500960	UV	L2FC_CPM	0.113955	0.901925	-0.472621	-0.223012	-0.551252	0.138431	-0.664876	0.045215	0.901925	-0.664876	0.901925
TTHERM_01474480	MMS	L2FC_CPM	-0.546908	-0.428625	-1.76926	-0.234363	0.226255	-1.03842	-1.05424	0.0396765	0.226255	-1.76926	-1.76926
TTHERM_01474480	HP	L2FC_CPM	-0.494831	0.214556	-0.790902	-0.531429	0.249656	-0.0740747	0.493508	0.0334749	0.493508	-0.790902	-0.790902
TTHERM_01474480	HU	L2FC_CPM	-0.241744	1.01685	0.0320493	-0.542091	-0.664025	-0.714587	-0.33031	0.0592429	1.01685	-0.714587	1.01685
TTHERM_01474480	IR	L2FC_CPM	1.38504	0.876441	0.699165	-0.692382	0.325819	0.0334675	1.14429	0.0538076	1.38504	-0.692382	1.38504
TTHERM_01474480	CPT	L2FC_CPM	2.51072	-0.152961	1.33928	0.711701	1.54128	1.1659	0.621201	0.03611	2.51072	-0.152961	2.51072
TTHERM_01474480	UV	L2FC_CPM	0.975336	-0.267138	0.0466959	-0.716178	0.767486	-0.0473779	-0.54887	0.0531823	0.975336	-0.716178	0.975336
TTHERM_01115210	MMS	L2FC_CPM	0.292588	0.268731	0.0399474	0.0533335	-0.54918	0.159164	-0.252337	0.0164156	0.292588	-0.54918	-0.54918
TTHERM_01115210	HP	L2FC_CPM	0.551623	0.417563	0.575159	0.278282	-0.391467	0.234721	-0.0600443	0.0224444	0.575159	-0.391467	0.575159
TTHERM_01115210	HU	L2FC_CPM	0.678673	-0.258033	-0.254593	0.732792	-0.285832	-0.334402	0.479401	0.0473405	0.732792	-0.334402	0.732792
TTHERM_01115210	IR	L2FC_CPM	1.0326	0.538858	0.106984	-0.154382	-0.261188	0.473387	0.766345	0.037781	1.0326	-0.261188	1.0326
TTHERM_01115210	CPT	L2FC_CPM	-0.505557	-0.717168	-0.704002	-0.389492	0.447552	1.1598	-0.228077	0.0316707	1.1598	-0.717168	1.1598
TTHERM_01115210	UV	L2FC_CPM	0.593941	-1.03719	-0.386836	-0.583238	0.924036	0.631607	-0.0743954	0.0618268	0.924036	-1.03719	-1.03719
TTHERM_01742570	MMS	L2FC_CPM	0.448777	0.603265	0.479336	-0.618297	0.205687	-0.156865	-0.422034	0.026821	0.603265	-0.618297	-0.618297
TTHERM_01742570	HP	L2FC_CPM	1.24753	0.853766	0.479336	-0.0735888	0.114276	-0.22129	-0.414107	0.0397958	1.24753	-0.414107	1.24753
TTHERM_01742570	HU	L2FC_CPM	-0.120387	-0.105294	1.56075	0.941918	1.01203	0.56501	-0.588415	0.0735292	1.56075	-0.588415	1.56075
TTHERM_01742570	IR	L2FC_CPM	-0.377022	-0.159542	-0.785168	-1.04046	0.268615	0.231764	0.545393	0.04998	0.545393	-1.04046	-1.04046
TTHERM_01742570	CPT	L2FC_CPM	-0.0897116	0.904185	1.22151	0.218881	-0.0193038	0.0125125	0.941523	0.0246492	1.22151	-0.0897116	1.22151
TTHERM_01742570	UV	L2FC_CPM	-0.968978	-0.186715	-0.105993	-1.37157	-0.920135	0.0324774	0.522095	0.0608778	0.522095	-1.37157	-1.37157
TTHERM_002653475	MMS	L2FC_CPM	-0.563493	0.148913	0.226853	-0.180108	-0.249124	-0.0823211	0	0.0150713	0.226853	-0.563493	-0.563493
TTHERM_002653475	HP	L2FC_CPM	0	0.275065	0.226853	-0.180108	-0.101928	-0.340991	-0.287191	0.0165383	0.275065	-0.340991	-0.340991
TTHERM_002653475	HU	L2FC_CPM	-0.444418	0.548269	-0.156677	0.236386	0.661787	-0.18014	0.253178	0.0416439	0.661787	-0.444418	0.661787
TTHERM_002653475	IR	L2FC_CPM	0.518389	0.548269	0.783707	-0.254404	-0.872181	-0.297573	-0.599334	0.0526173	0.783707	-0.872181	-0.872181
TTHERM_002653475	CPT	L2FC_CPM	0.881278	0	0.442706	-0.0460104	0.3067	0.843358	-0.0335011	0.0183743	0.881278	-0.0460104	0.881278
TTHERM_002653475	UV	L2FC_CPM	0.881278	0	0.442706	-0.263754	-0.180217	0.384908	-0.626164	0.0426748	0.881278	-0.626164	0.881278
TTHERM_00857780	MMS	L2FC_CPM	0	0	0	0	0	0.109602	0	0.00146185	0.109602	0	0.109602
TTHERM_00857780	HP	L2FC_CPM	0	0	0	0.00756196	0.285978	0.109602	-0.126804	0.0078264	0.285978	-0.126804	0.285978
TTHERM_00857780	HU	L2FC_CPM	0	0	0	0	0	0	-0.449126	0.0112536	0	-0.449126	-0.449126
TTHERM_00857780	IR	L2FC_CPM	0	0	0	0	0	0	0	0	0	0	0
TTHERM_00857780	CPT	L2FC_CPM	0	0.462382	0	0	0	0	0	0.00525086	0.462382	0	0.462382
TTHERM_00857780	UV	L2FC_CPM	0	0.462382	0	0	0	-0.45845	0	0.0184042	0.462382	-0.45845	0.462382
TTHERM_01082840	MMS	L2FC_CPM	-0.556761	-1.6945	-1.33076	-0.592603	-1.03045	0.057078	-0.500949	0.0360799	0.057078	-1.6945	-1.6945
TTHERM_01082840	HP	L2FC_CPM	-0.788485	-0.26619	-0.924003	0.531731	-0.207868	-0.611848	0.415511	0.0399387	0.531731	-0.924003	-0.924003
TTHERM_01082840	HU	L2FC_CPM	-0.130842	0.196962	0.514639	0.0372802	0.0504211	0.0870082	0.281707	0.0205861	0.514639	-0.130842	0.514639
TTHERM_01082840	IR	L2FC_CPM	1.75963	1.64625	1.71919	0.426397	0.376855	0.964835	1.35721	0.0405161	1.75963	0.376855	1.75963
TTHERM_01082840	CPT	L2FC_CPM	-0.657951	-2.37671	-1.23986	-0.744349	0.14056	0.182395	1.12866	0.0569659	1.12866	-2.37671	-2.37671
TTHERM_01082840	UV	L2FC_CPM	-0.482452	-0.683236	0.287565	0.0614243	0.720519	0.121274	0.8649	0.0474958	0.8649	-0.683236	0.8649
TTHERM_01109760	MMS	L2FC_CPM	-0.460124	0.568186	0.368567	0.191384	0.51367	0.378191	-0.176966	0.0202851	0.568186	-0.460124	0.568186
TTHERM_01109760	HP	L2FC_CPM	-0.456128	1.19042	1.22022	0.724199	0.618171	-0.0349908	0.00615319	0.0414723	1.22022	-0.456128	1.22022
TTHERM_01109760	HU	L2FC_CPM	-0.582469	-0.365507	-0.921658	-0.47054	-0.53325	-0.401374	-0.0114873	0.0300215	-0.0114873	-0.921658	-0.921658
TTHERM_01109760	IR	L2FC_CPM	0.138344	-0.244454	-0.000585441	0.0664404	0.380025	-0.366316	-0.178905	0.0211826	0.380025	-0.366316	0.380025
TTHERM_01109760	CPT	L2FC_CPM	-0.219974	0.235544	-0.677788	0.11814	0.535829	0.201861	-0.256703	0.0192394	0.535829	-0.677788	-0.677788
TTHERM_01109760	UV	L2FC_CPM	-0.44607	1.66812	0.883425	0.84842	1.34441	0.84483	1.12139	0.0442681	1.66812	-0.44607	1.66812
TTHERM_002653473	MMS	L2FC_CPM	0	0	0	0.173215	0.134382	0	0.137146	0.00410585	0.173215	0	0.173215
TTHERM_002653473	HP	L2FC_CPM	0.223944	0	0.0473049	0.173215	0.134382	0	-0.317137	0.0112426	0.223944	-0.317137	-0.317137
TTHERM_002653473	HU	L2FC_CPM	-0.430498	0	0	0	0.423939	-0.518989	0.268754	0.0351099	0.423939	-0.518989	-0.518989
TTHERM_002653473	IR	L2FC_CPM	-0.600203	-0.508043	0	-0.455339	0.423939	0	0.46788	0.0363884	0.46788	-0.600203	-0.600203
TTHERM_002653473	CPT	L2FC_CPM	0.146287	-0.383263	0.0298175	-0.0111537	-0.444839	0	-0.517403	0.0128612	0.146287	-0.517403	-0.517403
TTHERM_002653473	UV	L2FC_CPM	0.146287	0	0.0298175	0	-0.479924	-0.931762	-0.14263	0.0302639	0.146287	-0.931762	-0.931762
TTHERM_01579310	MMS	L2FC_CPM	0.727909	0.0495106	0.694407	-0.094338	-0.485306	-0.0787882	-0.683516	0.0299454	0.727909	-0.683516	0.727909
TTHERM_01579310	HP	L2FC_CPM	0.463343	0.317604	0.75343	-0.00730854	0.0935848	-0.253549	-0.72397	0.0328456	0.75343	-0.72397	0.75343
TTHERM_01579310	HU	L2FC_CPM	0.575368	1.33304	0.0496812	-0.396913	-0.905411	0.504725	-0.823504	0.0850321	1.33304	-0.905411	1.33304
TTHERM_01579310	IR	L2FC_CPM	0.740043	1.54028	-0.995345	-0.878606	-0.487268	0.0615113	0	0.0739429	1.54028	-0.995345	1.54028
TTHERM_01579310	CPT	L2FC_CPM	0.911498	-0.0735434	0.681273	0.872286	0.383555	0.274758	0.315848	0.0164601	0.911498	-0.0735434	0.911498
TTHERM_01579310	UV	L2FC_CPM	1.01538	-0.239234	0.542997	0.00156558	0.854696	0.929868	0.688258	0.0363122	1.01538	-0.239234	1.01538
TTHERM_001228899	MMS	L2FC_CPM	0.390266	0.432944	-0.0799494	0.386594	-0.269652	-0.198247	-0.495221	0.0208293	0.432944	-0.495221	-0.495221
TTHERM_001228899	HP	L2FC_CPM	0.391313	0.0578786	-0.187053	0.653499	0.109195	0.264535	0.00612927	0.01834	0.653499	-0.187053	0.653499
TTHERM_001228899	HU	L2FC_CPM	1.04638	1.05625	0.065147	0.524794	0.0095587	-0.639897	-0.112615	0.0618281	1.05625	-0.639897	1.05625
TTHERM_001228899	IR	L2FC_CPM	0.899882	0.424831	0.129995	0.342566	-0.262825	-0.753882	-0.551893	0.0485339	0.899882	-0.753882	0.899882
TTHERM_001228899	CPT	L2FC_CPM	-0.325186	-0.0481245	-0.0928471	-0.520691	1.16979	-0.26083	-0.393506	0.0229758	1.16979	-0.520691	1.16979
TTHERM_001228899	UV	L2FC_CPM	-0.175621	-0.0612083	0.433025	0.0284704	0.893678	-0.988557	0.342377	0.0478949	0.893678	-0.988557	-0.988557
TTHERM_001180979	MMS	L2FC_CPM	0.20909	-0.500501	0.0547444	-0.278443	-0.0304326	-0.609064	0.0551728	0.0176671	0.20909	-0.609064	-0.609064
TTHERM_001180979	HP	L2FC_CPM	0.468124	0	0.0547444	0.0254157	0.230746	-0.286639	0.260342	0.0158327	0.468124	-0.286639	0.468124
TTHERM_001180979	HU	L2FC_CPM	0.240581	-0.900925	-0.569807	0.511205	0.447924	-0.43014	0.308953	0.0584597	0.511205	-0.900925	-0.900925
TTHERM_001180979	IR	L2FC_CPM	0.249679	0.333316	-1.1409	-0.0898854	0.0704713	-0.934445	0.956926	0.0602389	0.956926	-1.1409	-1.1409
TTHERM_001180979	CPT	L2FC_CPM	0.709679	-0.556263	0.526791	-1.13949	0.301535	-0.420679	-0.459281	0.0327293	0.709679	-1.13949	-1.13949
TTHERM_001180979	UV	L2FC_CPM	-0.0126073	0.410906	0.373617	-0.400027	0.868596	0.400157	1.00515	0.0377491	1.00515	-0.400027	1.00515
TTHERM_001346829	MMS	L2FC_CPM	0.688947	0.263677	-0.367097	-0.594106	0.101248	-0.177234	-0.353938	0.0249585	0.688947	-0.594106	0.688947
TTHERM_001346829	HP	L2FC_CPM	1.4039	0.352248	-0.0673386	-0.963269	0.307079	0.0254447	-0.768458	0.0518957	1.4039	-0.963269	1.4039
TTHERM_001346829	HU	L2FC_CPM	-0.68047	0.158017	-0.537334	0.109454	-0.683009	-0.337882	-0.262536	0.0385763	0.158017	-0.683009	-0.683009
TTHERM_001346829	IR	L2FC_CPM	-1.89445	1.26627	1.00283	-0.38229	-0.632017	-0.660528	0.435228	0.0918231	1.26627	-1.89445	-1.89445
TTHERM_001346829	CPT	L2FC_CPM	0.28022	0.140315	0.75961	-0.0646826	1.4403	-0.636783	-0.177468	0.0314545	1.4403	-0.636783	1.4403
TTHERM_001346829	UV	L2FC_CPM	0.511105	0.243866	0.107182	-0.676803	0.22325	-0.480738	-0.0427759	0.035267	0.511105	-0.676803	-0.676803
TTHERM_00485740	MMS	L2FC_CPM	-0.596081	0.519781	-0.0978925	-0.030134	0.0843261	0.00147637	-0.146241	0.017477	0.519781	-0.596081	-0.596081
TTHERM_00485740	HP	L2FC_CPM	0.136477	0.957334	0.234624	0.288097	0.527061	-0.365006	-0.122218	0.02821	0.957334	-0.365006	0.957334
TTHERM_00485740	HU	L2FC_CPM	-0.706343	0.445328	0.510131	0.205023	-0.333984	0.787576	-0.0377935	0.0535051	0.787576	-0.706343	0.787576
TTHERM_00485740	IR	L2FC_CPM	0.840657	-0.152339	0.323575	0.661377	-0.125566	-0.726286	0.245212	0.0429279	0.840657	-0.726286	0.840657
TTHERM_00485740	CPT	L2FC_CPM	-0.338904	1.19667	1.40862	0.0113622	-1.04368	-1.14845	0.0728135	0.0477503	1.40862	-1.14845	1.40862
TTHERM_00485740	UV	L2FC_CPM	1.48445	-0.252473	0.446674	0.228117	-0.232514	0.832395	1.03067	0.0513419	1.48445	-0.252473	1.48445
TTHERM_01054110	MMS	L2FC_CPM	-0.00811976	0	0.0391832	-0.767734	0.256619	-0.125822	-0.797583	0.0223207	0.256619	-0.797583	-0.797583
TTHERM_01054110	HP	L2FC_CPM	0.268622	0	0.274094	-0.485706	0.426259	0.0832081	-0.131017	0.0203173	0.426259	-0.485706	-0.485706
TTHERM_01054110	HU	L2FC_CPM	0.228353	-0.377563	0.40321	0.260711	0.310196	-0.857679	0.571941	0.0481562	0.571941	-0.857679	-0.857679
TTHERM_01054110	IR	L2FC_CPM	-0.0572041	0.302415	0.128841	-0.0416082	0.722101	-0.154848	-0.0598184	0.0225442	0.722101	-0.154848	0.722101
TTHERM_01054110	CPT	L2FC_CPM	-0.296438	0.0833298	1.09546	1.33077	1.66476	1.87933	0.565848	0.0367248	1.87933	-0.296438	1.87933
TTHERM_01054110	UV	L2FC_CPM	0.0232885	0.972096	-0.0757672	0.723859	1.06393	0.523051	0.184648	0.0361386	1.06393	-0.0757672	1.06393
TTHERM_00897120	MMS	L2FC_CPM	-0.304459	0.0314476	0	0	-0.249124	-0.114913	0	0.00729106	0.0314476	-0.304459	-0.304459
TTHERM_00897120	HP	L2FC_CPM	0.234497	0.450168	0	0	0	-0.155882	-0.198177	0.014546	0.450168	-0.198177	0.450168
TTHERM_00897120	HU	L2FC_CPM	0	-0.0719491	0	0	0.423939	0.914448	0	0.030279	0.914448	-0.0719491	0.914448
TTHERM_00897120	IR	L2FC_CPM	0	-0.508043	0	-0.418862	-0.0976917	0.914448	-0.460155	0.0368496	0.914448	-0.508043	0.914448
TTHERM_00897120	CPT	L2FC_CPM	0.404394	-0.148573	0	-0.407394	-0.426119	0	0.451594	0.0168067	0.451594	-0.426119	0.451594
TTHERM_00897120	UV	L2FC_CPM	-0.175621	-0.8158	0	0	0	0	0.451594	0.0280261	0.451594	-0.8158	-0.8158
TTHERM_00147470	MMS	L2FC_CPM	-0.886876	-0.837194	-1.48522	-1.41213	-3.026	-3.72321	-4.37149	0.105578	-0.837194	-4.37149	-4.37149
TTHERM_00147470	HP	L2FC_CPM	-1.3975	0.525198	0.907552	1.28482	0.998343	-0.548471	-0.536631	0.0660443	1.28482	-1.3975	-1.3975
TTHERM_00147470	HU	L2FC_CPM	-1.29606	0.651874	0.759583	0.974483	1.32426	0.898542	0.73437	0.0640043	1.32426	-1.29606	1.32426
TTHERM_00147470	IR	L2FC_CPM	3.36715	-2.35173	-0.729945	-0.918607	-1.12428	-1.54627	-0.888534	0.136407	3.36715	-2.35173	3.36715
TTHERM_00147470	CPT	L2FC_CPM	-3.07035	-1.27194	-0.735946	0.209557	-0.050611	-0.592436	-0.672773	0.0515788	0.209557	-3.07035	-3.07035
TTHERM_00147470	UV	L2FC_CPM	0.507221	-3.11222	-1.8417	-0.945117	-1.64666	-0.721865	-0.00746545	0.125724	0.507221	-3.11222	-3.11222
TTHERM_00314860	MMS	L2FC_CPM	-0.0525607	-0.840381	-2.80224	-2.87675	-3.43296	-2.31887	-2.88889	0.0863772	-0.0525607	-3.43296	-3.43296
TTHERM_00314860	HP	L2FC_CPM	-0.283862	-1.65202	-2.27135	-2.44595	-2.82098	-0.335982	-1.84705	0.0856101	-0.283862	-2.82098	-2.82098
TTHERM_00314860	HU	L2FC_CPM	-0.472436	0.796437	0.481524	0.275039	-0.105322	-0.175013	-0.11758	0.0445656	0.796437	-0.472436	0.796437
TTHERM_00314860	IR	L2FC_CPM	0.74544	-0.0192208	-0.862472	-2.13936	-1.97889	-0.62469	-0.202849	0.0970484	0.74544	-2.13936	-2.13936
TTHERM_00314860	CPT	L2FC_CPM	-0.224848	-0.105449	-0.614451	-1.76065	-2.36117	-3.02265	-3.35313	0.0767852	-0.105449	-3.35313	-3.35313
TTHERM_00314860	UV	L2FC_CPM	-0.106998	0.129669	0.121716	-0.625312	-0.82433	-0.570683	-0.543824	0.0340332	0.129669	-0.82433	-0.82433
TTHERM_01618810	MMS	L2FC_CPM	0.331167	0.0858483	-1.31742	-1.56484	-1.71206	-2.10835	-1.70385	0.0574878	0.331167	-2.10835	-2.10835
TTHERM_01618810	HP	L2FC_CPM	-0.808888	-0.556123	0.372464	-0.127627	-1.43479	-1.05625	-0.850279	0.0443864	0.372464	-1.43479	-1.43479
TTHERM_01618810	HU	L2FC_CPM	-0.02377	0.487477	0.965015	-0.00792771	-0.129208	-0.688223	-0.914943	0.0674865	0.965015	-0.914943	0.965015
TTHERM_01618810	IR	L2FC_CPM	0.426211	-0.338811	-0.269033	-1.13985	-0.823545	-0.629365	-0.526123	0.0427633	0.426211	-1.13985	-1.13985
TTHERM_01618810	CPT	L2FC_CPM	0.400667	-0.867681	-0.339655	0.600856	0.93373	0.934837	0.305069	0.030619	0.934837	-0.867681	0.934837
TTHERM_01618810	UV	L2FC_CPM	-1.26336	-2.13714	-0.899517	-0.97487	-0.52049	-0.0080368	-0.562152	0.0648297	-0.0080368	-2.13714	-2.13714
TTHERM_00956420	MMS	L2FC_CPM	-0.321617	0.383794	-0.455263	-0.164639	-0.249124	0	0.0671605	0.0159668	0.383794	-0.455263	-0.455263
TTHERM_00956420	HP	L2FC_CPM	-0.203839	0.365153	-0.00923206	0.0282815	-0.250662	0.0837357	0.0671605	0.0133982	0.365153	-0.250662	0.365153
TTHERM_00956420	HU	L2FC_CPM	-0.570126	0.61953	0.338913	1.28561	0.765444	-0.422824	0.303187	0.0638241	1.28561	-0.570126	1.28561
TTHERM_00956420	IR	L2FC_CPM	-0.346929	0.61953	1.28564	1.02637	0.46397	-0.441977	0.578697	0.0489129	1.28564	-0.441977	1.28564
TTHERM_00956420	CPT	L2FC_CPM	0.394082	0.631329	0.678077	0.202379	0.524195	0.198167	0.451594	0.00888191	0.678077	0.198167	0.678077
TTHERM_00956420	UV	L2FC_CPM	0.354048	0.219672	0.187834	0.487613	-0.204952	-1.25556	0.0551983	0.0435464	0.487613	-1.25556	-1.25556
TTHERM_01359430	MMS	L2FC_CPM	-0.333438	-0.346785	0.27684	-0.164407	-0.133996	-0.507174	-0.511257	0.0150697	0.27684	-0.511257	-0.511257
TTHERM_01359430	HP	L2FC_CPM	0.399121	0.0909586	0.307749	-0.0485034	-0.237462	-0.752926	0.384459	0.0270769	0.399121	-0.752926	-0.752926
TTHERM_01359430	HU	L2FC_CPM	0.629613	-0.90489	0.352285	-0.382172	-0.125203	0.1671	0.140567	0.0526572	0.629613	-0.90489	-0.90489
TTHERM_01359430	IR	L2FC_CPM	1.38047	-0.166109	0.352257	-0.145144	-0.350721	0.814139	0.353216	0.0472433	1.38047	-0.350721	1.38047
TTHERM_01359430	CPT	L2FC_CPM	0.294518	0.873288	0.639602	-0.0155656	0.0459748	0.91107	-0.21961	0.021235	0.91107	-0.21961	0.91107
TTHERM_01359430	UV	L2FC_CPM	0.49528	0.719144	0.512025	0.469817	-0.594696	-0.831604	-0.162958	0.0494305	0.719144	-0.831604	-0.831604
TTHERM_01609730	MMS	L2FC_CPM	0.572701	1.75346	2.05674	1.36532	2.06397	1.13454	1.85589	0.025953	2.06397	0.572701	2.06397
TTHERM_01609730	HP	L2FC_CPM	0.481891	-0.171524	0.816866	0.258453	1.21701	-1.27281	-0.268731	0.0541942	1.21701	-1.27281	-1.27281
TTHERM_01609730	HU	L2FC_CPM	0.825015	0.826717	-0.0398476	0.18703	2.2654	0.173548	0.906573	0.0647602	2.2654	-0.0398476	2.2654
TTHERM_01609730	IR	L2FC_CPM	1.84581	1.08255	0.52745	0.45856	1.2427	0.217709	1.07324	0.0396557	1.84581	0.217709	1.84581
TTHERM_01609730	CPT	L2FC_CPM	-1.87203	-0.186457	0.0215141	0.59738	0.115676	0.703331	0.61948	0.0377594	0.703331	-1.87203	-1.87203
TTHERM_01609730	UV	L2FC_CPM	0.902576	0.701421	0.607726	0.988277	0.0455367	0.586548	0.347371	0.0246091	0.988277	0.0455367	0.988277
TTHERM_001475519	MMS	L2FC_CPM	0.266889	-1.23902	0.733116	-0.436651	0.101248	-0.939116	-1.17801	0.0457725	0.733116	-1.23902	-1.23902
TTHERM_001475519	HP	L2FC_CPM	0.673446	-0.693563	0.367691	-0.197519	0.169174	-0.911371	-0.209845	0.0395578	0.673446	-0.911371	-0.911371
TTHERM_001475519	HU	L2FC_CPM	0.35288	0.825965	0.0577936	0.224393	-0.187081	0.139267	-0.788499	0.0493162	0.825965	-0.788499	0.825965
TTHERM_001475519	IR	L2FC_CPM	-1.08974	1.24231	0.107274	-0.0168145	-0.466673	0.365189	-0.137379	0.0577615	1.24231	-1.08974	1.24231
TTHERM_001475519	CPT	L2FC_CPM	0.0894031	-0.928872	0.428298	0.398167	0.279795	-0.00168738	0.249813	0.0191467	0.428298	-0.928872	-0.928872
TTHERM_001475519	UV	L2FC_CPM	-0.519193	-1.44133	0.768082	0.266885	0.303611	0.392391	-0.193536	0.0602163	0.768082	-1.44133	-1.44133
TTHERM_000215879	MMS	L2FC_CPM	0.0686397	-1.3924	1.1508	1.15172	1.2362	0.975513	1.36444	0.0448342	1.36444	-1.3924	-1.3924
TTHERM_000215879	HP	L2FC_CPM	-0.205129	1.01326	0.939161	1.49086	2.05613	0.422264	1.32507	0.0441336	2.05613	-0.205129	2.05613
TTHERM_000215879	HU	L2FC_CPM	0.28314	-0.419878	-1.76318	-0.381127	-0.531558	-0.517017	-0.0832664	0.0655791	0.28314	-1.76318	-1.76318
TTHERM_000215879	IR	L2FC_CPM	1.19763	0.618971	0.0599517	0.445304	0.36643	-0.00769018	0.68103	0.0308036	1.19763	-0.00769018	1.19763
TTHERM_000215879	CPT	L2FC_CPM	1.55574	0.248453	0.585874	1.29074	0.830915	1.09402	0.69056	0.0201517	1.55574	0.248453	1.55574
TTHERM_000215879	UV	L2FC_CPM	0.204423	0.333084	0.88213	1.04789	0.551561	1.27919	1.37591	0.0347344	1.37591	0.204423	1.37591
TTHERM_001656029	MMS	L2FC_CPM	0.274535	0.0436158	0.12064	-0.034029	-0.0693096	0.492971	-0.736127	0.020144	0.492971	-0.736127	-0.736127
TTHERM_001656029	HP	L2FC_CPM	0.480456	0.283435	0.226853	-0.0055859	-0.0587929	0.00681346	-0.631017	0.0226989	0.480456	-0.631017	-0.631017
TTHERM_001656029	HU	L2FC_CPM	0.251815	-0.61327	0.631624	0.0937066	0	0.459574	0.932601	0.0491714	0.932601	-0.61327	0.932601
TTHERM_001656029	IR	L2FC_CPM	0.455639	0.529795	0.671751	0.084466	-0.549871	-0.474871	-0.204973	0.0406241	0.671751	-0.549871	0.671751
TTHERM_001656029	CPT	L2FC_CPM	-0.492338	-0.737086	0.0840851	0.543867	0.449893	0.0390853	-1.0588	0.0300181	0.543867	-1.0588	-1.0588
TTHERM_001656029	UV	L2FC_CPM	-0.277276	0.408198	-0.414419	0.714383	-0.0387976	-0.917562	0.888742	0.055246	0.888742	-0.917562	-0.917562
TTHERM_01195950	MMS	L2FC_CPM	-0.416148	-2.1047	-1.05951	-0.633863	-1.21718	-1.21482	-1.14653	0.0323807	-0.416148	-2.1047	-2.1047
TTHERM_01195950	HP	L2FC_CPM	-0.779152	-2.16103	-0.391055	0.664302	0.731542	-0.0551713	0.971949	0.0737712	0.971949	-2.16103	-2.16103
TTHERM_01195950	HU	L2FC_CPM	-0.486362	-1.252	-0.479432	-0.575833	-0.291678	0.126025	0.0234392	0.0497843	0.126025	-1.252	-1.252
TTHERM_01195950	IR	L2FC_CPM	0.915795	0.748981	1.67018	1.28229	1.09787	1.07144	0.933175	0.0202097	1.67018	0.748981	1.67018
TTHERM_01195950	CPT	L2FC_CPM	5.62068	0.748207	0.120632	-0.322136	0.253771	1.03324	1.25566	0.0712457	5.62068	-0.322136	5.62068
TTHERM_01195950	UV	L2FC_CPM	-0.86307	-0.747557	-0.156271	-0.0210998	-0.141456	0.159492	0.402327	0.0395418	0.402327	-0.86307	-0.86307
TTHERM_00586520	MMS	L2FC_CPM	0.198326	-0.262296	0.580473	0.335208	1.27986	0.960755	2.17589	0.0415804	2.17589	-0.262296	2.17589
TTHERM_00586520	HP	L2FC_CPM	-0.359255	-0.942711	0.0912547	1.34474	1.47913	0.928939	2.1361	0.0699218	2.1361	-0.942711	2.1361
TTHERM_00586520	HU	L2FC_CPM	0.044477	-1.05048	-0.735721	-0.830092	0.21672	0.48819	-0.469781	0.0662101	0.48819	-1.05048	-1.05048
TTHERM_00586520	IR	L2FC_CPM	0.672063	0.679142	0.248847	0.879523	0.448293	0.447269	-1.2545	0.0463425	0.879523	-1.2545	-1.2545
TTHERM_00586520	CPT	L2FC_CPM	-1.69309	-0.0055746	0.00972083	0.528333	0.869127	0.996051	-0.02035	0.039178	0.996051	-1.69309	-1.69309
TTHERM_00586520	UV	L2FC_CPM	1.66792	0.473435	0.447459	0.763415	1.1998	0.462884	0.139069	0.0380176	1.66792	0.139069	1.66792
TTHERM_00628720	MMS	L2FC_CPM	0.0186587	0.00574231	-0.794957	-0.57186	-0.0768613	-0.147835	-0.618439	0.0192918	0.0186587	-0.794957	-0.794957
TTHERM_00628720	HP	L2FC_CPM	0.295179	0.114291	-0.653054	-0.542979	-0.128421	0.643808	0.630389	0.0355266	0.643808	-0.653054	-0.653054
TTHERM_00628720	HU	L2FC_CPM	0.299479	0.268488	-0.120598	-0.0764656	-0.134186	0.196716	0.0301208	0.0191368	0.299479	-0.134186	0.299479
TTHERM_00628720	IR	L2FC_CPM	-0.881595	0.104908	0.23538	0.338964	0.329442	0.483608	0.228802	0.0296935	0.483608	-0.881595	-0.881595
TTHERM_00628720	CPT	L2FC_CPM	0.719522	0.268214	-0.300127	-0.107862	-0.00588195	0.326121	0.636005	0.0182086	0.719522	-0.300127	0.719522
TTHERM_00628720	UV	L2FC_CPM	0.231087	-0.137877	-0.28421	0.0915344	0.324933	0.197788	0.289275	0.0184903	0.324933	-0.28421	0.324933
TTHERM_001101579	MMS	L2FC_CPM	-0.589569	-0.735049	-0.00803159	0.0213886	-0.379498	-0.131206	-1.64687	0.0325668	0.0213886	-1.64687	-1.64687
TTHERM_001101579	HP	L2FC_CPM	0.313227	-0.360699	-0.685758	0.187872	-0.63016	0.392992	-0.928702	0.0376215	0.392992	-0.928702	-0.928702
TTHERM_001101579	HU	L2FC_CPM	0.155924	0.100207	0.551796	-0.645796	-0.364001	-0.354721	-0.648366	0.0484112	0.551796	-0.648366	-0.648366
TTHERM_001101579	IR	L2FC_CPM	1.47074	0.245322	1.60101	-0.379498	0.226134	0.982024	0.19858	0.0545715	1.60101	-0.379498	1.60101
TTHERM_001101579	CPT	L2FC_CPM	-0.11392	0.543213	0.986265	0.93088	-0.839728	-0.182716	-0.356734	0.0330115	0.986265	-0.839728	0.986265
TTHERM_001101579	UV	L2FC_CPM	0.202917	-0.183745	0.135486	0.748288	-0.724665	-0.319397	0.242398	0.0394112	0.748288	-0.724665	0.748288
TTHERM_01709380	MMS	L2FC_CPM	0.267103	-1.05023	-0.332513	0.193852	-1.25713	-1.00703	-1.75487	0.0467345	0.267103	-1.75487	-1.75487
TTHERM_01709380	HP	L2FC_CPM	0.319755	-0.573965	-0.415609	0.252438	-0.167203	0.772871	-0.306732	0.0326683	0.772871	-0.573965	0.772871
TTHERM_01709380	HU	L2FC_CPM	-0.524733	1.67603	0.560919	-0.126559	0.0688354	-0.210024	0.792653	0.0719825	1.67603	-0.524733	1.67603
TTHERM_01709380	IR	L2FC_CPM	0.928786	0.764366	0.502832	0.057232	-0.186242	0.898932	0.255337	0.0334755	0.928786	-0.186242	0.928786
TTHERM_01709380	CPT	L2FC_CPM	-0.0608423	-2.20454	-1.35484	-1.81344	-0.882717	0.631639	1.29771	0.0675193	1.29771	-2.20454	-2.20454
TTHERM_01709380	UV	L2FC_CPM	-1.41479	-1.35055	0.290483	0.0840166	0.345455	0.151816	-0.0509249	0.0611769	0.345455	-1.41479	-1.41479
TTHERM_00849190	MMS	L2FC_CPM	0.352239	0.318186	0.465162	0.558118	0.473232	-0.0835707	-0.0353248	0.0133321	0.558118	-0.0835707	0.558118
TTHERM_00849190	HP	L2FC_CPM	0.550102	0.957515	0.0668659	0.257515	-0.361545	-0.5229	-0.580947	0.0393588	0.957515	-0.580947	0.957515
TTHERM_00849190	HU	L2FC_CPM	0.0100152	0.551587	0.8483	0.180392	0.366616	-0.57968	-0.0268528	0.0460015	0.8483	-0.57968	0.8483
TTHERM_00849190	IR	L2FC_CPM	0.0675458	-0.923327	-0.240643	-1.16939	-0.46077	-0.865409	-1.21184	0.0448417	0.0675458	-1.21184	-1.21184
TTHERM_00849190	CPT	L2FC_CPM	1.87262	2.60618	1.83751	1.2685	1.78414	2.20898	1.77357	0.0160768	2.60618	1.2685	2.60618
TTHERM_00849190	UV	L2FC_CPM	1.131	-0.00642936	-0.861978	-1.13483	-0.519059	-0.221584	-0.197772	0.0614252	1.131	-1.13483	-1.13483
TTHERM_00285240	MMS	L2FC_CPM	0.468942	1.76381	-0.226727	-0.295641	0.111098	0.389212	0.330031	0.0336192	1.76381	-0.295641	1.76381
TTHERM_00285240	HP	L2FC_CPM	0.786317	1.05146	-0.331868	-0.127627	-0.428205	-0.307611	-0.682121	0.0420968	1.05146	-0.682121	1.05146
TTHERM_00285240	HU	L2FC_CPM	0.636948	0.0435839	-0.803899	-0.985445	-1.11842	0.466812	0.724482	0.0853557	0.724482	-1.11842	-1.11842
TTHERM_00285240	IR	L2FC_CPM	0.921139	-0.294619	-0.0535371	0.39601	-0.0469327	-0.353892	0.238769	0.03503	0.921139	-0.353892	0.921139
TTHERM_00285240	CPT	L2FC_CPM	1.03572	0.984667	0.661088	0.102461	0.602559	1.13421	1.78919	0.0228291	1.78919	0.102461	1.78919
TTHERM_00285240	UV	L2FC_CPM	0.892415	1.11367	0.691702	0.174581	-0.750111	0.831128	0.240475	0.0472366	1.11367	-0.750111	1.11367
TTHERM_00751030	MMS	L2FC_CPM	-0.399032	0.545153	0.259033	-0.449975	-0.56282	-0.0393896	-0.374727	0.0230878	0.545153	-0.56282	-0.56282
TTHERM_00751030	HP	L2FC_CPM	0.301599	0.363635	0.1908	-0.477468	-0.253895	0.373165	-0.193749	0.0228636	0.373165	-0.477468	-0.477468
TTHERM_00751030	HU	L2FC_CPM	0.595455	0.964178	-0.698204	0.47903	-0.0650383	-0.00506353	0.0892079	0.0538814	0.964178	-0.698204	0.964178
TTHERM_00751030	IR	L2FC_CPM	0.708623	0.352291	0.357796	0.827734	0.332342	-0.122934	0.0301732	0.0260021	0.827734	-0.122934	0.827734
TTHERM_00751030	CPT	L2FC_CPM	0.597706	-0.109685	0.111782	0.53464	0.877875	0.296474	1.5943	0.0251446	1.5943	-0.109685	1.5943
TTHERM_00751030	UV	L2FC_CPM	0.737126	-0.314031	-0.831473	-0.647953	0.0536114	-0.748693	-0.256389	0.0468471	0.737126	-0.831473	-0.831473
TTHERM_01312310	MMS	L2FC_CPM	0.360702	0.651542	1.01311	-0.678765	-0.971958	-0.241083	-0.731973	0.0438835	1.01311	-0.971958	1.01311
TTHERM_01312310	HP	L2FC_CPM	0.455835	-0.0323249	1.36463	0.122373	-0.621482	0.253829	0.559912	0.0386184	1.36463	-0.621482	1.36463
TTHERM_01312310	HU	L2FC_CPM	-0.95535	1.49279	0.358473	0.774336	0.326872	0.618913	-0.616541	0.0812027	1.49279	-0.95535	1.49279
TTHERM_01312310	IR	L2FC_CPM	0.258239	-0.9753	-1.87455	-1.11933	-2.04258	-1.87422	-1.35253	0.0770555	0.258239	-2.04258	-2.04258
TTHERM_01312310	CPT	L2FC_CPM	-1.05314	-2.14796	-0.439716	-0.98361	-2.68851	-2.43934	-2.83602	0.0548514	-0.439716	-2.83602	-2.83602
TTHERM_01312310	UV	L2FC_CPM	0.19962	-2.62292	-0.353244	-0.66107	-2.10407	-1.1606	-0.270968	0.102968	0.19962	-2.62292	-2.62292
TTHERM_01045780	MMS	L2FC_CPM	0.350256	0.444338	1.01311	1.3886	0.591953	-0.141679	-0.212948	0.0310956	1.3886	-0.212948	1.3886
TTHERM_01045780	HP	L2FC_CPM	0.0195728	-0.488397	0.4714	0.454693	-1.70379	-0.874823	-1.01496	0.059109	0.4714	-1.70379	-1.70379
TTHERM_01045780	HU	L2FC_CPM	0.0308246	0.246447	0.191131	-1.07089	0.515153	0.0575732	0.77793	0.0540998	0.77793	-1.07089	-1.07089
TTHERM_01045780	IR	L2FC_CPM	1.82756	-0.27648	-0.746612	-0.490555	-0.642349	0.790904	2.66917	0.0997457	2.66917	-0.746612	2.66917
TTHERM_01045780	CPT	L2FC_CPM	-0.0403403	-0.136738	0.118386	-0.65338	-1.61049	0.146871	-0.564463	0.0290147	0.146871	-1.61049	-1.61049
TTHERM_01045780	UV	L2FC_CPM	0.0499098	-0.931034	-0.722008	-1.24674	-0.812052	1.30007	-0.658309	0.0699275	1.30007	-1.24674	1.30007
TTHERM_00440700	MMS	L2FC_CPM	0.0114231	-0.0309362	0.263113	0.497946	-0.398979	-0.325362	0.144047	0.0179592	0.497946	-0.398979	0.497946
TTHERM_00440700	HP	L2FC_CPM	-0.361602	-0.348083	0.122464	1.46292	1.26979	0.068457	0.514619	0.0467631	1.46292	-0.361602	1.46292
TTHERM_00440700	HU	L2FC_CPM	0.638863	0.799456	0.624705	0.00420274	-0.528074	-0.0484683	0.0061025	0.0472403	0.799456	-0.528074	0.799456
TTHERM_00440700	IR	L2FC_CPM	1.12262	1.15076	1.22112	0.903726	0.6703	-0.479362	0.740613	0.0372939	1.22112	-0.479362	1.22112
TTHERM_00440700	CPT	L2FC_CPM	0.181496	-0.0480395	1.25383	1.80783	0.21309	0.6857	0.400078	0.0294118	1.80783	-0.0480395	1.80783
TTHERM_00440700	UV	L2FC_CPM	0.103466	0.818295	1.61435	1.67811	1.35474	0.724871	-0.296932	0.0559793	1.67811	-0.296932	1.67811
TTHERM_00441700	MMS	L2FC_CPM	-0.272701	-0.569156	-0.607985	-0.629255	-0.476952	-0.183059	-0.729915	0.0116983	-0.183059	-0.729915	-0.729915
TTHERM_00441700	HP	L2FC_CPM	-0.457957	-1.47251	-1.32291	-1.80496	-1.30544	0.245137	-0.638376	0.0545191	0.245137	-1.80496	-1.80496
TTHERM_00441700	HU	L2FC_CPM	-0.276097	-0.0397211	-0.0292523	-0.235314	-0.230396	-0.224791	-0.167505	0.0102025	-0.0292523	-0.276097	-0.276097
TTHERM_00441700	IR	L2FC_CPM	-0.872997	0.188281	-0.235711	-0.278839	-0.286711	0.0445954	0.325627	0.03241	0.325627	-0.872997	-0.872997
TTHERM_00441700	CPT	L2FC_CPM	-0.908154	-0.946266	-0.811092	-0.773619	-0.642382	-0.784285	-0.975325	0.00606325	-0.642382	-0.975325	-0.975325
TTHERM_00441700	UV	L2FC_CPM	-1.66623	-1.50537	-0.228501	-0.15307	-0.128964	-0.205854	-0.261447	0.0543798	-0.128964	-1.66623	-1.66623
TTHERM_00476400	MMS	L2FC_CPM	0.767103	0.153305	-1.31742	0.0581184	-0.188761	0.130273	-0.873912	0.0391977	0.767103	-1.31742	-1.31742
TTHERM_00476400	HP	L2FC_CPM	1.75493	-0.348083	0.0611859	0.904694	0.944991	0.736231	1.24599	0.0433991	1.75493	-0.348083	1.75493
TTHERM_00476400	HU	L2FC_CPM	0.670488	-1.32473	-0.050451	0.048551	0.245847	-0.865301	-0.302552	0.0739271	0.670488	-1.32473	-1.32473
TTHERM_00476400	IR	L2FC_CPM	-0.951824	-0.590579	0.487202	1.04178	1.32059	0.40195	0.689578	0.0637967	1.32059	-0.951824	1.32059
TTHERM_00476400	CPT	L2FC_CPM	-0.7202	-0.454055	-0.0116825	0.272872	1.68143	1.41683	1.58619	0.0461056	1.68143	-0.7202	1.68143
TTHERM_00476400	UV	L2FC_CPM	-0.333168	0.237366	-0.516263	0.160752	1.03508	0.234316	0.351851	0.039568	1.03508	-0.516263	1.03508
TTHERM_000193169	MMS	L2FC_CPM	0.214627	0.904348	0.811274	0.325296	1.63604	-0.321565	0.771263	0.0322783	1.63604	-0.321565	1.63604
TTHERM_000193169	HP	L2FC_CPM	0.95152	0.658089	1.95295	1.05551	0.602054	-0.766908	0.703475	0.0458185	1.95295	-0.766908	1.95295
TTHERM_000193169	HU	L2FC_CPM	-0.10727	-0.800514	0.108906	-1.15973	-1.33463	-0.88525	1.14641	0.0971955	1.14641	-1.33463	-1.33463
TTHERM_000193169	IR	L2FC_CPM	-0.375822	1.43204	2.53138	1.3881	0.508382	0.0613078	0.834212	0.069941	2.53138	-0.375822	2.53138
TTHERM_000193169	CPT	L2FC_CPM	0.943638	-0.883816	-1.20418	0.473634	-0.612527	-1.11154	-1.17159	0.0409195	0.943638	-1.20418	-1.20418
TTHERM_000193169	UV	L2FC_CPM	2.91855	0.940234	0.591158	2.89755	1.22661	0.314798	0.640097	0.0709256	2.91855	0.314798	2.91855
TTHERM_01469310	MMS	L2FC_CPM	0.422378	-0.660324	0.749996	-1.45621	-0.931083	0.27364	-0.581431	0.0473007	0.749996	-1.45621	-1.45621
TTHERM_01469310	HP	L2FC_CPM	0.546477	0.114974	0.660936	-1.59428	0.190428	0.150069	0.773751	0.0454189	0.773751	-1.59428	-1.59428
TTHERM_01469310	HU	L2FC_CPM	0.91639	-0.473777	0.396907	0.104047	0.574721	0.668329	-1.45915	0.0797884	0.91639	-1.45915	-1.45915
TTHERM_01469310	IR	L2FC_CPM	0.81633	0.795171	0.999958	-0.519364	1.30949	1.59292	0.193363	0.0509213	1.59292	-0.519364	1.59292
TTHERM_01469310	CPT	L2FC_CPM	2.1426	1.08275	1.7947	1.50568	0.852559	1.89578	0.503785	0.0259953	2.1426	0.503785	2.1426
TTHERM_01469310	UV	L2FC_CPM	0.455704	0.74254	-0.103244	0.874357	0.619551	1.07496	0.0684998	0.0333014	1.07496	-0.103244	1.07496
TTHERM_01194630	MMS	L2FC_CPM	-0.0844281	-0.80527	-0.958948	-1.36492	-0.954052	-1.18097	-0.677638	0.0245852	-0.0844281	-1.36492	-1.36492
TTHERM_01194630	HP	L2FC_CPM	0.0181232	-1.67704	-1.39849	-1.4218	-1.44514	-0.111261	-0.14588	0.0548557	0.0181232	-1.67704	-1.67704
TTHERM_01194630	HU	L2FC_CPM	0.0433684	-0.102686	-0.00933668	-0.205976	-0.107213	-0.0128932	-0.38509	0.0149528	0.0433684	-0.38509	-0.38509
TTHERM_01194630	IR	L2FC_CPM	-0.137348	-0.646274	-0.702975	-0.592846	-0.314127	0.175451	0.524187	0.0389999	0.524187	-0.702975	-0.702975
TTHERM_01194630	CPT	L2FC_CPM	-1.08578	-1.67895	-1.16011	-1.24215	-1.1934	-0.771587	-1.11625	0.0133169	-0.771587	-1.67895	-1.67895
TTHERM_01194630	UV	L2FC_CPM	0.372631	-0.249988	-0.443761	-0.77863	-0.526078	-0.511187	-0.413998	0.0290676	0.372631	-0.77863	-0.77863
TTHERM_001531559	MMS	L2FC_CPM	0.604269	0.0131761	-0.436405	-0.0206728	-0.123003	-0.2871	-1.43058	0.0332487	0.604269	-1.43058	-1.43058
TTHERM_001531559	HP	L2FC_CPM	0.297004	0.533644	0.231519	0.834372	-0.47909	0.0779402	0.065556	0.0265816	0.834372	-0.47909	0.834372
TTHERM_001531559	HU	L2FC_CPM	-0.766628	0.509564	0.212666	0.101275	-0.000979904	-0.63525	0.424206	0.0510207	0.509564	-0.766628	-0.766628
TTHERM_001531559	IR	L2FC_CPM	0.555613	1.68585	1.75377	0.916969	1.37685	1.43826	1.67123	0.029013	1.75377	0.555613	1.75377
TTHERM_001531559	CPT	L2FC_CPM	0.939158	-0.592504	0.79384	1.85888	1.07861	1.55947	0.638799	0.0333198	1.85888	-0.592504	1.85888
TTHERM_001531559	UV	L2FC_CPM	0.0589963	0.012298	-1.56611	0.114304	0.562924	2.21552	1.33519	0.0907877	2.21552	-1.56611	2.21552
TTHERM_00757540	MMS	L2FC_CPM	0.111731	-2.28309	0.0657545	0.293395	-0.286841	-1.02811	-1.54742	0.0583229	0.293395	-2.28309	-2.28309
TTHERM_00757540	HP	L2FC_CPM	0.18162	-1.97039	-0.250842	-0.399912	-0.386424	-0.588798	0.376518	0.0497188	0.376518	-1.97039	-1.97039
TTHERM_00757540	HU	L2FC_CPM	-0.064789	-0.176908	0.966117	0.292871	0.168431	1.19472	0.318046	0.0483865	1.19472	-0.176908	1.19472
TTHERM_00757540	IR	L2FC_CPM	-0.457504	0.546261	1.6928	0.423082	0.411404	1.46563	0.200557	0.0538979	1.6928	-0.457504	1.6928
TTHERM_00757540	CPT	L2FC_CPM	-1.07708	-2.00163	-1.91973	-0.456229	-1.87788	-0.684846	-1.83623	0.0346684	-0.456229	-2.00163	-2.00163
TTHERM_00757540	UV	L2FC_CPM	-0.144768	-1.43967	-0.70449	-0.343234	-0.626736	-0.070536	0.171354	0.0473477	0.171354	-1.43967	-1.43967
TTHERM_01169350	MMS	L2FC_CPM	-0.895916	0.705961	1.50426	-0.0702419	0.548122	-0.193591	-0.855203	0.0487121	1.50426	-0.895916	1.50426
TTHERM_01169350	HP	L2FC_CPM	-1.18856	0.755142	0.774385	-0.222255	0.705151	-0.217214	-0.891694	0.0545785	0.774385	-1.18856	-1.18856
TTHERM_01169350	HU	L2FC_CPM	0.0286012	0.840949	0.29681	-0.30866	-0.743384	0.697344	0.294065	0.0561891	0.840949	-0.743384	0.840949
TTHERM_01169350	IR	L2FC_CPM	0.528124	-0.508586	-0.243506	-0.368743	-0.164634	0.333559	-0.406152	0.0316956	0.528124	-0.508586	0.528124
TTHERM_01169350	CPT	L2FC_CPM	0.8243	1.22208	0.974382	0.447659	0.192383	0.531385	0.722611	0.0158546	1.22208	0.192383	1.22208
TTHERM_01169350	UV	L2FC_CPM	0.323032	0.904076	-0.0550828	-0.304204	0.00194399	-0.297186	-0.121246	0.0328908	0.904076	-0.304204	0.904076
TTHERM_00978770	MMS	L2FC_CPM	-0.182682	-0.256902	-0.11333	-0.0883951	-0.398663	0.55981	0.352906	0.0186944	0.55981	-0.398663	0.55981
TTHERM_00978770	HP	L2FC_CPM	-0.419692	-0.57437	-0.489417	-0.515387	-0.620599	-0.136221	-0.540496	0.0103812	-0.136221	-0.620599	-0.620599
TTHERM_00978770	HU	L2FC_CPM	-0.13835	-0.116297	-0.322126	-0.200632	-0.177458	-0.129014	0.0263082	0.0107349	0.0263082	-0.322126	-0.322126
TTHERM_00978770	IR	L2FC_CPM	-0.495848	0.219738	-0.15075	-0.0569949	-0.0755554	-0.0262618	0.301189	0.020773	0.301189	-0.495848	-0.495848
TTHERM_00978770	CPT	L2FC_CPM	0.133568	0.386673	0.290086	0.939869	0.962825	0.771089	0.434387	0.0151002	0.962825	0.133568	0.962825
TTHERM_00978770	UV	L2FC_CPM	-1.18358	-0.887367	0.160059	0.0953995	-0.0187035	-0.0590005	-0.114582	0.0425856	0.160059	-1.18358	-1.18358
TTHERM_000488179	MMS	L2FC_CPM	0.36716	0.346012	-0.122147	-0.451427	-0.0414362	-0.359151	0.0150866	0.0178976	0.36716	-0.451427	-0.451427
TTHERM_000488179	HP	L2FC_CPM	0.179479	0.305595	-0.131379	0	0.255081	-0.127924	-0.253916	0.014751	0.305595	-0.253916	0.305595
TTHERM_000488179	HU	L2FC_CPM	0.0449207	-0.319749	0.575437	-0.947037	0.626193	0.32905	-0.374309	0.0600306	0.626193	-0.947037	-0.947037
TTHERM_000488179	IR	L2FC_CPM	-0.0240517	0.300899	0.820649	0.389758	0.501746	0.423782	0.108135	0.0211342	0.820649	-0.0240517	0.820649
TTHERM_000488179	CPT	L2FC_CPM	0.361329	0.0408223	0.923594	-0.376113	-0.640943	-1.00225	0.358125	0.0325817	0.923594	-1.00225	-1.00225
TTHERM_000488179	UV	L2FC_CPM	0.304897	0.428793	0.695219	-0.929454	-0.952232	0.134656	1.30112	0.0671117	1.30112	-0.952232	1.30112
TTHERM_00188280	MMS	L2FC_CPM	-0.727525	1.15722	0.853904	0.199879	0.284404	-0.06346	1.11502	0.0369664	1.15722	-0.727525	1.15722
TTHERM_00188280	HP	L2FC_CPM	-0.207184	-0.0323249	0.122464	0.456841	0.868989	-0.203517	0.754547	0.0292828	0.868989	-0.207184	0.868989
TTHERM_00188280	HU	L2FC_CPM	0.366496	0.309332	-0.683575	0.620508	1.32697	0.258474	-0.0804293	0.0585921	1.32697	-0.683575	1.32697
TTHERM_00188280	IR	L2FC_CPM	0.501621	-1.12915	-0.472952	0.57884	1.4781	-0.116435	-0.696621	0.073375	1.4781	-1.12915	1.4781
TTHERM_00188280	CPT	L2FC_CPM	-0.999352	1.15419	0.773481	0.812517	0.937027	0.732975	0.575095	0.0262706	1.15419	-0.999352	1.15419
TTHERM_00188280	UV	L2FC_CPM	-0.73321	0.445914	-0.805083	0.597629	1.22014	0.583422	-0.167353	0.0615781	1.22014	-0.805083	1.22014
TTHERM_00266190	MMS	L2FC_CPM	-0.256273	-2.49426	-0.647707	-0.909264	0.0447871	-0.430934	-0.702579	0.04471	0.0447871	-2.49426	-2.49426
TTHERM_00266190	HP	L2FC_CPM	-0.653343	0.219053	0.892104	0.873623	1.17056	0.773461	0.84573	0.0344764	1.17056	-0.653343	1.17056
TTHERM_00266190	HU	L2FC_CPM	-0.439115	-0.590352	-1.29793	-1.51493	-0.703925	-1.02302	-0.721363	0.0499751	-0.439115	-1.51493	-1.51493
TTHERM_00266190	IR	L2FC_CPM	-1.54182	0.512383	0.921924	0.476771	0.722119	0.273844	0.714282	0.0528132	0.921924	-1.54182	-1.54182
TTHERM_00266190	CPT	L2FC_CPM	0.448551	-1.17913	-0.801592	-0.385623	-0.156959	0.210001	-0.0955709	0.0281439	0.448551	-1.17913	-1.17913
TTHERM_00266190	UV	L2FC_CPM	-0.34807	0.623543	1.19951	1.25734	1.20141	1.91037	1.66111	0.050513	1.91037	-0.34807	1.91037
TTHERM_001397459	MMS	L2FC_CPM	0.552537	0.0250646	0.0240936	0.635602	-0.134872	0.233533	-0.166141	0.0174492	0.635602	-0.166141	0.635602
TTHERM_001397459	HP	L2FC_CPM	0.4085	-0.097133	-0.235138	0.417629	-0.134872	0.054351	-0.193941	0.0179271	0.417629	-0.235138	0.417629
TTHERM_001397459	HU	L2FC_CPM	-0.224052	-0.673858	0.594755	0.524794	-1.09783	0.785775	0.725962	0.0750396	0.785775	-1.09783	-1.09783
TTHERM_001397459	IR	L2FC_CPM	0.0258819	0.322966	0.690936	0.342566	-0.725403	0.745236	0.218866	0.0367023	0.745236	-0.725403	0.745236
TTHERM_001397459	CPT	L2FC_CPM	0.194763	-0.397036	-0.670865	0.432639	-0.217439	-0.510312	-0.0802553	0.0195108	0.432639	-0.670865	-0.670865
TTHERM_001397459	UV	L2FC_CPM	-0.0948127	-0.875531	-0.48813	0.384135	0.44202	0.458786	0.437147	0.0423495	0.458786	-0.875531	-0.875531
TTHERM_01327890	MMS	L2FC_CPM	0.732059	-1.25936	0.245515	-0.196362	-1.43319	-1.49097	-2.01567	0.0630079	0.732059	-2.01567	-2.01567
TTHERM_01327890	HP	L2FC_CPM	1.78632	-0.347618	0.314373	-0.372604	-0.58733	-0.349843	-2.30834	0.0785301	1.78632	-2.30834	-2.30834
TTHERM_01327890	HU	L2FC_CPM	-0.361833	0.596545	0.37931	0.362255	-0.156366	-0.272909	0.0871528	0.0380359	0.596545	-0.361833	0.596545
TTHERM_01327890	IR	L2FC_CPM	0.334799	0.845877	0.365042	-0.994356	0.802991	1.29281	0.42848	0.0504614	1.29281	-0.994356	1.29281
TTHERM_01327890	CPT	L2FC_CPM	0.930604	2.13091	1.98911	1.42704	2.28575	1.52912	1.43848	0.0198402	2.28575	0.930604	2.28575
TTHERM_01327890	UV	L2FC_CPM	0.778495	1.65487	1.14108	-0.412444	1.05997	0.303526	0.802871	0.0483504	1.65487	-0.412444	1.65487
TTHERM_001263929	MMS	L2FC_CPM	1.0212	0.428279	0.484773	-0.423483	-0.20066	-0.919373	-0.601543	0.0395265	1.0212	-0.919373	1.0212
TTHERM_001263929	HP	L2FC_CPM	0.609224	0.63102	0.0140619	-0.559711	-0.190357	-0.715903	-0.160167	0.0355971	0.63102	-0.715903	-0.715903
TTHERM_001263929	HU	L2FC_CPM	0.0732729	0.261086	0.706677	0.197646	0.344027	0.413758	-0.417801	0.0331225	0.706677	-0.417801	0.706677
TTHERM_001263929	IR	L2FC_CPM	0.276877	0.351557	0.606718	0.23968	0.992952	1.38426	0.623949	0.0302587	1.38426	0.23968	1.38426
TTHERM_001263929	CPT	L2FC_CPM	0.595512	-0.27683	-0.524624	0.374039	0.0956744	1.14455	0.381606	0.0261815	1.14455	-0.524624	1.14455
TTHERM_001263929	UV	L2FC_CPM	-0.170777	-0.40589	-0.927464	-0.226572	-0.243813	0.807836	1.01874	0.0557539	1.01874	-0.927464	1.01874
TTHERM_00520890	MMS	L2FC_CPM	0.0500437	1.71784	0.705533	0.403474	-0.59667	0.92638	0.712425	0.037796	1.71784	-0.59667	1.71784
TTHERM_00520890	HP	L2FC_CPM	0.381938	-0.867735	-0.305877	0.295895	-0.0912717	1.18598	1.04889	0.0486658	1.18598	-0.867735	1.18598
TTHERM_00520890	HU	L2FC_CPM	0.407047	-0.0424488	-0.183227	-0.324446	-0.125045	0.339894	0.365697	0.0305888	0.407047	-0.324446	0.407047
TTHERM_00520890	IR	L2FC_CPM	-0.865444	0.361543	-0.462974	0.199014	0.805955	0.715822	0.761794	0.0500503	0.805955	-0.865444	-0.865444
TTHERM_00520890	CPT	L2FC_CPM	1.18271	1.26856	1.00221	1.01867	0.86461	0.714731	0.801018	0.00900023	1.26856	0.714731	1.26856
TTHERM_00520890	UV	L2FC_CPM	-1.3862	-0.194184	0.0372505	0.458991	0.354351	0.296819	0.175945	0.0461981	0.458991	-1.3862	-1.3862
TTHERM_00398050	MMS	L2FC_CPM	0.456147	0.199718	0.152274	0.0984286	-0.278675	-0.206144	-0.344228	0.0165309	0.456147	-0.344228	0.456147
TTHERM_00398050	HP	L2FC_CPM	0.690931	1.179	0.562315	0.542588	-0.820924	-0.918085	-1.34368	0.0654769	1.179	-1.34368	-1.34368
TTHERM_00398050	HU	L2FC_CPM	0.365309	0.573813	0.348432	0.274192	-0.0169567	-0.272967	-0.400813	0.0367178	0.573813	-0.400813	0.573813
TTHERM_00398050	IR	L2FC_CPM	-1.17699	-1.61351	-1.48122	-1.11896	-1.77217	-1.21271	-1.2848	0.0257712	-1.11896	-1.77217	-1.77217
TTHERM_00398050	CPT	L2FC_CPM	0.597464	-0.28281	-0.669826	-0.827369	-0.98177	-0.690155	-1.15329	0.027392	0.597464	-1.15329	-1.15329
TTHERM_00398050	UV	L2FC_CPM	0.545549	-0.151277	-0.362623	-0.334676	-0.408631	-0.209459	-0.516763	0.0265748	0.545549	-0.516763	0.545549
TTHERM_00697600	MMS	L2FC_CPM	-0.314627	-0.0792614	-0.482277	0.284921	-0.1958	0.686169	1.14467	0.0322671	1.14467	-0.482277	1.14467
TTHERM_00697600	HP	L2FC_CPM	-0.539939	0.0961793	-0.0618154	0.338696	0.311339	-0.17806	0.193965	0.0207205	0.338696	-0.539939	-0.539939
TTHERM_00697600	HU	L2FC_CPM	-0.857795	-0.306636	0.223011	0.139165	0.472312	0.55564	0.780251	0.0558545	0.780251	-0.857795	-0.857795
TTHERM_00697600	IR	L2FC_CPM	0.383947	0.650144	0.637799	0.348169	0.2578	0.272621	0.504806	0.0125215	0.650144	0.2578	0.650144
TTHERM_00697600	CPT	L2FC_CPM	-0.681213	-0.633066	0.684641	0.813918	1.00289	1.09958	0.94078	0.0323912	1.09958	-0.681213	1.09958
TTHERM_00697600	UV	L2FC_CPM	0.495906	1.05019	0.530105	0.434484	0.604096	0.323903	0.213118	0.0194464	1.05019	0.213118	1.05019
TTHERM_00829290	MMS	L2FC_CPM	-0.366246	0	0.0265769	-0.282027	0.274997	-0.619166	-0.771193	0.021955	0.274997	-0.771193	-0.771193
TTHERM_00829290	HP	L2FC_CPM	0	0	0.223128	0.288097	0.274997	-0.179182	-0.0929535	0.0125556	0.288097	-0.179182	0.288097
TTHERM_00829290	HU	L2FC_CPM	0.0631506	-0.46819	0.0786936	-0.159551	0.363324	-0.585954	-0.327189	0.0368126	0.363324	-0.585954	-0.585954
TTHERM_00829290	IR	L2FC_CPM	0.0956779	0	0.519078	0.274794	0.416991	0	0.0998312	0.0161587	0.519078	0	0.519078
TTHERM_00829290	CPT	L2FC_CPM	0.262757	-0.398573	-0.391846	-0.407394	-1.12222	0.781683	-0.164012	0.0282954	0.781683	-1.12222	-1.12222
TTHERM_00829290	UV	L2FC_CPM	0	-0.0335887	-1.201	-0.922241	-0.305991	0.198167	0.272169	0.0486766	0.272169	-1.201	-1.201
TTHERM_01357370	MMS	L2FC_CPM	0.371071	0.897061	-0.944318	-1.03996	-0.833395	-1.05684	-0.976969	0.0416387	0.897061	-1.05684	-1.05684
TTHERM_01357370	HP	L2FC_CPM	2.57945	2.82664	0.670452	0.397257	0.828115	-0.683287	0.531946	0.0719032	2.82664	-0.683287	2.82664
TTHERM_01357370	HU	L2FC_CPM	0.661115	0.614201	0.00604989	0.685534	0.50668	-0.211377	0.474622	0.0316355	0.685534	-0.211377	0.685534
TTHERM_01357370	IR	L2FC_CPM	-1.46942	-1.53479	-3.02209	-0.9715	-2.05809	-0.734773	0.17123	0.10616	0.17123	-3.02209	-3.02209
TTHERM_01357370	CPT	L2FC_CPM	-1.94347	-2.70568	-2.73194	-1.87857	-2.5629	-2.09824	-2.1148	0.0220371	-1.87857	-2.73194	-2.73194
TTHERM_01357370	UV	L2FC_CPM	-1.55149	-2.36675	-2.12813	-1.45837	-1.09023	-0.764567	0.466472	0.0982502	0.466472	-2.36675	-2.36675
TTHERM_01329990	MMS	L2FC_CPM	-0.234194	-1.08652	-1.11124	-0.548694	-1.37382	-0.166193	-0.823292	0.0287354	-0.166193	-1.37382	-1.37382
TTHERM_01329990	HP	L2FC_CPM	0.241114	-0.774012	-0.759172	-0.515437	-1.84477	0.18154	-0.179117	0.0504372	0.241114	-1.84477	-1.84477
TTHERM_01329990	HU	L2FC_CPM	-0.015944	0.244511	0.0050868	-0.189719	-0.340718	-0.475382	0.41249	0.0335624	0.41249	-0.475382	-0.475382
TTHERM_01329990	IR	L2FC_CPM	0.266885	0.663315	0.383141	0.00013773	0.0531999	0.632987	0.798076	0.0242784	0.798076	0.00013773	0.798076
TTHERM_01329990	CPT	L2FC_CPM	0.552052	1.05992	1.51652	0.771358	1.17985	1.21278	1.29144	0.014135	1.51652	0.552052	1.51652
TTHERM_01329990	UV	L2FC_CPM	-0.00382559	0.415142	0.562691	0.626328	0.099786	0.593433	0.697267	0.0207695	0.697267	-0.00382559	0.697267
TTHERM_01365630	MMS	L2FC_CPM	0.416728	-0.215329	0.685925	0.419291	0.455687	-0.680523	0.233039	0.0245595	0.685925	-0.680523	0.685925
TTHERM_01365630	HP	L2FC_CPM	0.22497	-0.215329	0.947325	0.501976	-0.180037	-0.38615	0.10148	0.0307834	0.947325	-0.38615	0.947325
TTHERM_01365630	HU	L2FC_CPM	-0.465837	0.138207	1.19885	1.01223	0.326108	0.350054	0.859827	0.0545952	1.19885	-0.465837	1.19885
TTHERM_01365630	IR	L2FC_CPM	0.90904	0.790279	1.64838	1.53434	-0.369895	0.916266	0.189578	0.0510351	1.64838	-0.369895	1.64838
TTHERM_01365630	CPT	L2FC_CPM	1.74924	-0.595815	2.38535	1.23854	2.27199	2.06609	1.60068	0.0382446	2.38535	-0.595815	2.38535
TTHERM_01365630	UV	L2FC_CPM	1.95249	0.347372	0.396756	-0.0801318	0.744209	0.380557	-0.269624	0.0515563	1.95249	-0.269624	1.95249
TTHERM_01398470	MMS	L2FC_CPM	-0.296685	-0.156118	-0.754817	-1.40422	-1.86586	-1.23146	-2.10254	0.0488188	-0.156118	-2.10254	-2.10254
TTHERM_01398470	HP	L2FC_CPM	-0.914288	0.611298	-0.0946756	-1.13275	-1.49733	-0.268702	-1.72927	0.0633942	0.611298	-1.72927	-1.72927
TTHERM_01398470	HU	L2FC_CPM	0.165268	1.084	1.05504	0.854568	0.492882	0.099501	0.164642	0.0401731	1.084	0.099501	1.084
TTHERM_01398470	IR	L2FC_CPM	-0.767804	-0.745513	-0.799807	-1.30259	-1.22952	-0.926751	-0.967469	0.021158	-0.745513	-1.30259	-1.30259
TTHERM_01398470	CPT	L2FC_CPM	0.514759	-0.435682	-0.763504	-0.407765	-0.742376	-0.535844	-1.23058	0.0250214	0.514759	-1.23058	-1.23058
TTHERM_01398470	UV	L2FC_CPM	-0.492157	-0.0829551	0.130723	-0.193217	-0.291152	-0.324014	-0.162157	0.0170858	0.130723	-0.492157	-0.492157
TTHERM_00094330	MMS	L2FC_CPM	-0.390427	0.45003	-0.136665	0.0117711	-0.392121	-0.614047	0.119255	0.0208726	0.45003	-0.614047	-0.614047
TTHERM_00094330	HP	L2FC_CPM	-0.13003	-0.405779	-0.293388	-0.470139	-0.369651	0.150861	0.272021	0.0196807	0.272021	-0.470139	-0.470139
TTHERM_00094330	HU	L2FC_CPM	0.229353	0.069437	0.264279	-0.287597	-0.160655	0.351475	0.274645	0.0240743	0.351475	-0.287597	0.351475
TTHERM_00094330	IR	L2FC_CPM	2.96273	0.121994	0.494113	-0.326611	-0.0936476	0.351709	0.864909	0.0717417	2.96273	-0.326611	2.96273
TTHERM_00094330	CPT	L2FC_CPM	0.322922	0.98149	0.680151	0.0700253	-0.176052	0.0389975	0.287707	0.0185286	0.98149	-0.176052	0.98149
TTHERM_00094330	UV	L2FC_CPM	0.133838	-0.132843	0.137065	-0.49638	-0.6569	-0.480423	-0.00498705	0.0284306	0.137065	-0.6569	-0.6569
TTHERM_01583420	MMS	L2FC_CPM	-0.170705	-0.437744	-0.686535	-0.475779	0.024997	-1.17768	-0.766961	0.02386	0.024997	-1.17768	-1.17768
TTHERM_01583420	HP	L2FC_CPM	0.632415	0.475766	0.0612366	0.403389	0.709382	-0.776215	-0.463673	0.0371994	0.709382	-0.776215	-0.776215
TTHERM_01583420	HU	L2FC_CPM	-0.430498	-0.454024	0	0	0.879457	0.315145	-0.177891	0.0465627	0.879457	-0.454024	0.879457
TTHERM_01583420	IR	L2FC_CPM	0	-0.0172392	0	0	0.357826	0.315145	0.00479096	0.0112509	0.357826	-0.0172392	0.357826
TTHERM_01583420	CPT	L2FC_CPM	2.63839	2.90048	2.92624	2.18832	2.47951	1.12435	0.113377	0.0397659	2.92624	0.113377	2.92624
TTHERM_01583420	UV	L2FC_CPM	0.278414	0	0.294001	1.13173	1.12714	-0.740522	-1.05252	0.0688393	1.13173	-1.05252	1.13173
TTHERM_001051719	MMS	L2FC_CPM	0	0.80501	0	0	-0.279706	0	0	0.0143748	0.80501	-0.279706	0.80501
TTHERM_001051719	HP	L2FC_CPM	0	0.615153	0	0	0	0	0	0.00979611	0.615153	0	0.615153
TTHERM_001051719	HU	L2FC_CPM	-0.453742	0.152028	-0.432606	-0.0527127	0.455518	0	0.693672	0.0442467	0.693672	-0.453742	0.693672
TTHERM_001051719	IR	L2FC_CPM	0	-0.356016	-0.677846	0	0.455518	-0.218086	0.92043	0.0429292	0.92043	-0.677846	0.92043
TTHERM_001051719	CPT	L2FC_CPM	0	-0.42156	-0.41345	0	-0.491233	0	-0.752498	0.0143431	0	-0.752498	-0.752498
TTHERM_001051719	UV	L2FC_CPM	0.105801	0	0	0	-0.949903	0	0	0.0215255	0.105801	-0.949903	-0.949903
TTHERM_01503030	MMS	L2FC_CPM	-0.362676	0.55412	-0.121303	0.451497	0	-1.36712	0	0.033908	0.55412	-1.36712	-1.36712
TTHERM_01503030	HP	L2FC_CPM	0.577396	6.34877	6.26236	6.71255	6.39327	2.93806	4.28226	0.0902115	6.71255	0.577396	6.71255
TTHERM_01503030	HU	L2FC_CPM	0	0	-0.897222	-0.198953	-0.516133	-0.877698	0.647554	0.0601284	0.647554	-0.897222	-0.897222
TTHERM_01503030	IR	L2FC_CPM	3.39718	0	0	0	0	0.433835	0.801575	0.0717807	3.39718	0	3.39718
TTHERM_01503030	CPT	L2FC_CPM	0.840909	0	-0.211304	0	0	0	0.339164	0.01442	0.840909	-0.211304	0.840909
TTHERM_01503030	UV	L2FC_CPM	3.95482	-0.849845	0.180542	0	0	0	0.680432	0.0973078	3.95482	-0.849845	3.95482
TTHERM_01321540	MMS	L2FC_CPM	-0.0355059	-1.18987	-0.889288	-0.49872	-0.785958	-0.621832	-0.836686	0.0214857	-0.0355059	-1.18987	-1.18987
TTHERM_01321540	HP	L2FC_CPM	0.11206	-1.39073	-0.639514	-0.477023	-0.618357	-0.010772	-0.207582	0.0353107	0.11206	-1.39073	-1.39073
TTHERM_01321540	HU	L2FC_CPM	-0.621362	-0.362307	-0.494425	-0.303499	-0.202678	0.0254262	0.255749	0.033212	0.255749	-0.621362	-0.621362
TTHERM_01321540	IR	L2FC_CPM	-2.03728	-1.02512	-0.1342	-0.109499	0.280883	0.00169891	0.305116	0.0675864	0.305116	-2.03728	-2.03728
TTHERM_01321540	CPT	L2FC_CPM	-0.448759	-1.92309	-1.78184	-2.09791	-1.74062	-1.21309	-1.37419	0.030041	-0.448759	-2.09791	-2.09791
TTHERM_01321540	UV	L2FC_CPM	-0.849242	-1.78261	-1.01568	-1.08234	-0.655503	-0.0966385	0.0196093	0.0590844	0.0196093	-1.78261	-1.78261
TTHERM_001553979	MMS	L2FC_CPM	0	0.590959	0	0	0	0.102787	0	0.00871685	0.590959	0	0.590959
TTHERM_001553979	HP	L2FC_CPM	-0.161744	0.590959	0	0.0254157	0	0.102787	0	0.0132269	0.590959	-0.161744	0.590959
TTHERM_001553979	HU	L2FC_CPM	0	0.298269	-0.0427116	-0.422987	-0.7149	-0.00833179	-0.925884	0.0479971	0.298269	-0.925884	-0.925884
TTHERM_001553979	IR	L2FC_CPM	-0.600203	0.298269	0	-0.455339	0	0.454874	0	0.0305215	0.454874	-0.600203	-0.600203
TTHERM_001553979	CPT	L2FC_CPM	0.20752	0	0	0	0.42747	0.436405	0.596142	0.0115081	0.596142	0	0.596142
TTHERM_001553979	UV	L2FC_CPM	0.658751	0	-0.472621	0	0.42747	-0.0220455	0.596142	0.0327918	0.658751	-0.472621	0.658751
TTHERM_00592660	MMS	L2FC_CPM	0.102362	0.485598	0.492854	-0.00853761	0.0906624	0.445077	0.697897	0.0142165	0.697897	-0.00853761	0.697897
TTHERM_00592660	HP	L2FC_CPM	-0.726129	-0.177733	0.196833	-0.540756	-0.427329	0.16667	0.683281	0.0343471	0.683281	-0.726129	-0.726129
TTHERM_00592660	HU	L2FC_CPM	-0.543831	0.369782	-0.0468649	0.0566293	0.235762	0.0758059	-0.218745	0.0311649	0.369782	-0.543831	-0.543831
TTHERM_00592660	IR	L2FC_CPM	0.00108884	0.0942092	-0.908082	-0.272777	0.00647256	0.0473499	0.0605307	0.0246756	0.0942092	-0.908082	-0.908082
TTHERM_00592660	CPT	L2FC_CPM	0.604931	0.450146	-0.115889	0.0902072	0.463626	0.0475608	0.124832	0.0124989	0.604931	-0.115889	0.604931
TTHERM_00592660	UV	L2FC_CPM	-0.914442	0.339821	-0.0495405	-0.0964907	0.103325	0.0145809	-0.544654	0.0353923	0.339821	-0.914442	-0.914442
TTHERM_01821940	MMS	L2FC_CPM	-0.0625832	0.037872	0.280651	0.216133	0.370502	-0.185109	-0.478214	0.0166826	0.370502	-0.478214	-0.478214
TTHERM_01821940	HP	L2FC_CPM	-0.224327	0.037872	0.591114	0.216133	0.405817	-0.185109	0.119855	0.0200763	0.591114	-0.224327	0.591114
TTHERM_01821940	HU	L2FC_CPM	-0.240316	0.426206	0.837291	0.0353265	0.231473	-0.732195	0.105558	0.0504573	0.837291	-0.732195	0.837291
TTHERM_01821940	IR	L2FC_CPM	0.173934	-0.237444	-0.10894	0.0993665	-0.614521	0	0.432737	0.0272283	0.432737	-0.614521	-0.614521
TTHERM_01821940	CPT	L2FC_CPM	0.349204	-0.304789	0.0693685	-0.137498	0.187775	0	0.284173	0.0113321	0.349204	-0.304789	0.349204
TTHERM_01821940	UV	L2FC_CPM	0.349204	0.06539	-0.042079	0.0247124	-0.260362	-0.409417	0.619775	0.0291744	0.619775	-0.409417	0.619775
TTHERM_01643990	MMS	L2FC_CPM	0.444058	-0.114292	-0.769208	0.24236	-0.286947	-0.387324	-0.136808	0.0229482	0.444058	-0.769208	-0.769208
TTHERM_01643990	HP	L2FC_CPM	-0.689626	-0.248453	0.041982	1.33641	0.112677	-0.663149	-0.140654	0.0427297	1.33641	-0.689626	1.33641
TTHERM_01643990	HU	L2FC_CPM	0.532664	1.47221	-0.537334	0.770793	0.391945	-0.303623	-0.845033	0.0822561	1.47221	-0.845033	1.47221
TTHERM_01643990	IR	L2FC_CPM	0.43243	0.879956	-0.247168	0.845618	0.629729	-0.428532	-0.763867	0.0526026	0.879956	-0.763867	0.879956
TTHERM_01643990	CPT	L2FC_CPM	0.916699	2.14301	1.57357	1.55783	1.54128	1.05327	0.946944	0.0183289	2.14301	0.916699	2.14301
TTHERM_01643990	UV	L2FC_CPM	-0.406684	0.862385	0.440349	0.543875	0.121246	0.800075	-0.00638851	0.0369025	0.862385	-0.406684	0.862385
TTHERM_01565120	MMS	L2FC_CPM	-0.0443624	0.238613	0	-0.0284431	-0.133996	0.0583213	0.0671605	0.00634249	0.238613	-0.133996	0.238613
TTHERM_01565120	HP	L2FC_CPM	-0.1013	0.0921805	0	-0.248857	0.151106	-0.057106	0.17621	0.0103572	0.17621	-0.248857	-0.248857
TTHERM_01565120	HU	L2FC_CPM	0.127698	1.37185	1.14543	1.02527	-0.0389807	-0.810503	-0.97207	0.0939798	1.37185	-0.97207	1.37185
TTHERM_01565120	IR	L2FC_CPM	-0.555583	0.713846	0.710478	0.991859	-0.190511	-0.0011703	-0.570547	0.0514405	0.991859	-0.570547	0.991859
TTHERM_01565120	CPT	L2FC_CPM	-1.36357	0.237412	-0.468253	-0.2361	-0.439922	0.459223	1.46015	0.0421058	1.46015	-1.36357	1.46015
TTHERM_01565120	UV	L2FC_CPM	-1.53132	0.835529	-0.14601	1.40873	1.05301	0.912824	0.775932	0.0702369	1.40873	-1.53132	-1.53132
TTHERM_01094780	MMS	L2FC_CPM	0.607077	0.722821	0.948383	0.661878	1.34649	1.12377	0.499412	0.0157453	1.34649	0.499412	1.34649
TTHERM_01094780	HP	L2FC_CPM	-0.455129	0.68918	0.0353639	0.410374	1.24403	-0.132251	-0.765857	0.0466796	1.24403	-0.765857	1.24403
TTHERM_01094780	HU	L2FC_CPM	0.538015	-0.145934	-0.497278	-0.120879	-0.358997	0.1955	-0.566116	0.0418468	0.538015	-0.566116	-0.566116
TTHERM_01094780	IR	L2FC_CPM	0.4729	0.895478	0.141845	-0.689869	-0.257908	0.0443206	-0.20041	0.0421676	0.895478	-0.689869	0.895478
TTHERM_01094780	CPT	L2FC_CPM	0.945957	1.49317	0.910327	1.35526	1.34258	0.807599	0.986964	0.0115281	1.49317	0.807599	1.49317
TTHERM_01094780	UV	L2FC_CPM	1.5313	1.14025	-0.244431	0.713047	1.11747	0.0125488	-0.37303	0.0585562	1.5313	-0.37303	1.5313
TTHERM_000942629	MMS	L2FC_CPM	0	0.352346	-0.0231472	-0.192921	-0.249124	0	0	0.00987484	0.352346	-0.249124	0.352346
TTHERM_000942629	HP	L2FC_CPM	0	0.352346	0.420398	0	0	-0.179182	0	0.0132941	0.420398	-0.179182	0.420398
TTHERM_000942629	HU	L2FC_CPM	-0.430498	0.260674	0.533017	0	0	-0.418188	0	0.0350783	0.533017	-0.430498	0.533017
TTHERM_000942629	IR	L2FC_CPM	0	0.260674	-0.397692	0	0	-0.458717	0	0.0194236	0.260674	-0.458717	-0.458717
TTHERM_000942629	CPT	L2FC_CPM	-0.22074	0	0.426058	0	0	0	0	0.00737021	0.426058	-0.22074	0.426058
TTHERM_000942629	UV	L2FC_CPM	0	0	0.426058	0	0	0	0	0.0084324	0.426058	0	0.426058
TTHERM_01494740	MMS	L2FC_CPM	-0.498747	0.146881	-0.177975	-1.29339	-0.526644	-0.320839	-0.385707	0.0242985	0.146881	-1.29339	-1.29339
TTHERM_01494740	HP	L2FC_CPM	-0.953523	0.103766	-0.397694	-1.58779	-0.294993	-0.319662	0.12751	0.0421703	0.12751	-1.58779	-1.58779
TTHERM_01494740	HU	L2FC_CPM	-0.270404	1.4641	1.37363	-0.355126	0.516301	-0.953965	-0.698793	0.0981123	1.4641	-0.953965	1.4641
TTHERM_01494740	IR	L2FC_CPM	0.397862	-1.11597	-0.567354	-0.796172	-0.103831	-0.0731658	-0.655627	0.045429	0.397862	-1.11597	-1.11597
TTHERM_01494740	CPT	L2FC_CPM	-1.95119	0.196676	-0.539382	-0.192692	-0.880509	1.35146	1.81046	0.0629584	1.81046	-1.95119	-1.95119
TTHERM_01494740	UV	L2FC_CPM	-1.83089	0.189568	-1.02608	-0.425561	-0.611823	-0.780407	-0.336871	0.0585136	0.189568	-1.83089	-1.83089
TTHERM_01331050	MMS	L2FC_CPM	0.156139	0.207525	-0.0231472	0.196427	0.159379	0.102787	-0.272463	0.00855055	0.207525	-0.272463	-0.272463
TTHERM_01331050	HP	L2FC_CPM	0.145857	0.373733	-0.0231472	0.402029	-0.0912833	0.261946	-0.65246	0.0233286	0.402029	-0.65246	-0.65246
TTHERM_01331050	HU	L2FC_CPM	-0.200869	1.22928	0.670936	1.10762	0.51188	-0.0688504	1.23283	0.0546978	1.23283	-0.200869	1.23283
TTHERM_01331050	IR	L2FC_CPM	0.0352619	0.716415	1.69721	0.1381	1.13273	-0.211356	0.368295	0.0506752	1.69721	-0.211356	1.69721
TTHERM_01331050	CPT	L2FC_CPM	-0.137535	0.65498	-0.168159	-0.326724	-0.116445	0.360592	0.315848	0.0168408	0.65498	-0.326724	0.65498
TTHERM_01331050	UV	L2FC_CPM	-0.115715	0.76689	0.310217	-0.0467486	-0.282	0.446315	0.480739	0.0310688	0.76689	-0.282	0.76689
TTHERM_01428470	MMS	L2FC_CPM	-0.133274	0.970389	0.533134	0.0429875	0.0945997	-0.431576	-0.792754	0.0330184	0.970389	-0.792754	0.970389
TTHERM_01428470	HP	L2FC_CPM	0.0826405	1.04182	0.875926	-0.0171237	0.282744	-0.0461083	-0.761782	0.0394839	1.04182	-0.761782	1.04182
TTHERM_01428470	HU	L2FC_CPM	-0.889899	0.290476	-0.221576	-0.253593	1.37198	-0.456744	-0.632499	0.0748067	1.37198	-0.889899	1.37198
TTHERM_01428470	IR	L2FC_CPM	-0.232335	0.195409	-0.82765	0.63383	-0.0994007	0.273714	0.588492	0.0410186	0.63383	-0.82765	-0.82765
TTHERM_01428470	CPT	L2FC_CPM	0.968882	0.825067	0.325117	0.333068	-0.0782036	0.672585	0.68696	0.0163086	0.968882	-0.0782036	0.968882
TTHERM_01428470	UV	L2FC_CPM	1.35194	0.150365	0.664802	0.0781953	-0.650597	0.269178	0.55937	0.0478646	1.35194	-0.650597	1.35194
TTHERM_00375190	MMS	L2FC_CPM	0.193019	0.921945	0.492813	1.13748	0.83977	0.4351	0.262326	0.0190261	1.13748	0.193019	1.13748
TTHERM_00375190	HP	L2FC_CPM	0.141313	-0.0358482	0.290149	0.660898	-0.245325	0.432174	-0.425838	0.0261308	0.660898	-0.425838	0.660898
TTHERM_00375190	HU	L2FC_CPM	-0.175985	1.20109	-0.0798154	0.642648	0.802909	-0.0477928	0.0175688	0.0508412	1.20109	-0.175985	1.20109
TTHERM_00375190	IR	L2FC_CPM	0.769219	0.626441	-0.893408	-0.300125	0.0890056	-0.915415	-1.04303	0.0640743	0.769219	-1.04303	-1.04303
TTHERM_00375190	CPT	L2FC_CPM	0.489886	-1.07254	0.0781412	0.865122	0.754033	2.52258	2.67877	0.0580267	2.67877	-1.07254	2.67877
TTHERM_00375190	UV	L2FC_CPM	0.913419	0.393768	1.043	0.568759	0.790316	0.880557	0.786093	0.0161718	1.043	0.393768	1.043
TTHERM_001026159	MMS	L2FC_CPM	0.223543	0.51578	0.158504	0.494646	-0.513909	-0.158122	-0.635317	0.0260279	0.51578	-0.635317	-0.635317
TTHERM_001026159	HP	L2FC_CPM	0.339788	0.615153	0.218967	0.418772	-0.283796	-0.395204	-0.311031	0.027154	0.615153	-0.395204	0.615153
TTHERM_001026159	HU	L2FC_CPM	0.760308	-0.476638	0	-0.656093	-1.01681	0.0330548	0.459412	0.0683136	0.760308	-1.01681	-1.01681
TTHERM_001026159	IR	L2FC_CPM	0.139001	-0.351284	0	0.236386	0.456269	0.264463	0.484422	0.022374	0.484422	-0.351284	0.484422
TTHERM_001026159	CPT	L2FC_CPM	0.881278	-0.397036	0	-0.407394	-0.946104	-0.518574	-0.534673	0.0260841	0.881278	-0.946104	-0.946104
TTHERM_001026159	UV	L2FC_CPM	0.881278	-1.03719	0	-0.22201	-0.459447	0.455987	0.454976	0.0549618	0.881278	-1.03719	-1.03719
TTHERM_00843720	MMS	L2FC_CPM	-0.869031	0.807293	0.310981	0.0208518	-0.0972695	-0.0308235	-0.0148126	0.0262112	0.807293	-0.869031	-0.869031
TTHERM_00843720	HP	L2FC_CPM	-0.0946416	0.513677	0.365208	-0.112101	-0.11628	-0.125779	0.0832563	0.0163628	0.513677	-0.125779	0.513677
TTHERM_00843720	HU	L2FC_CPM	-0.842155	-0.716315	-1.315	0.371806	0.231144	-0.2854	0.831041	0.0851397	0.831041	-1.315	-1.315
TTHERM_00843720	IR	L2FC_CPM	-0.129388	0.0166542	-0.164957	0.457855	0.48482	-0.363876	0.472279	0.0281016	0.48482	-0.363876	0.48482
TTHERM_00843720	CPT	L2FC_CPM	0.494953	0.421836	0.124974	0.329532	0.7488	-0.931438	-0.00630305	0.0237728	0.7488	-0.931438	-0.931438
TTHERM_00843720	UV	L2FC_CPM	0.301474	-0.165573	0.366005	0.00156558	1.03292	-0.6267	0.082682	0.0412991	1.03292	-0.6267	1.03292
TTHERM_01445920	MMS	L2FC_CPM	1.02454	-2.30478	-1.18054	-0.795139	-1.18319	-1.30624	-1.58591	0.058805	1.02454	-2.30478	-2.30478
TTHERM_01445920	HP	L2FC_CPM	0.739328	-0.870122	-0.797804	0.497194	-0.0448486	0.728945	-1.28793	0.0579097	0.739328	-1.28793	-1.28793
TTHERM_01445920	HU	L2FC_CPM	-0.682369	0.43809	-0.26324	0.269767	-0.28569	1.10972	0.209449	0.0592884	1.10972	-0.682369	1.10972
TTHERM_01445920	IR	L2FC_CPM	0.74243	0.777065	0.594855	0.376273	0.108606	1.58655	0.88929	0.0328203	1.58655	0.108606	1.58655
TTHERM_01445920	CPT	L2FC_CPM	-0.716214	-2.42062	-2.91021	-2.01528	-0.927695	0.496556	-0.257355	0.0683222	0.496556	-2.91021	-2.91021
TTHERM_01445920	UV	L2FC_CPM	-1.99367	-0.324206	-0.113613	0.0605175	0.16163	-0.109283	0.53179	0.0606406	0.53179	-1.99367	-1.99367
TTHERM_01296380	MMS	L2FC_CPM	-0.0264572	0.00725276	0.226853	0	0	-0.130295	0	0.00506588	0.226853	-0.130295	0.226853
TTHERM_01296380	HP	L2FC_CPM	0.339788	0.179055	0.226853	0	0.0359778	-0.169092	-0.167092	0.0132784	0.339788	-0.169092	0.339788
TTHERM_01296380	HU	L2FC_CPM	0.0984227	0.376406	0.456795	0.201132	-1.14074	-0.350147	0.786808	0.0624956	0.786808	-1.14074	-1.14074
TTHERM_01296380	IR	L2FC_CPM	0.889949	0.574751	-0.105261	0.802829	-1.1354	-0.491064	-0.293025	0.0614962	0.889949	-1.1354	-1.1354
TTHERM_01296380	CPT	L2FC_CPM	1.68962	0.303553	-0.312735	0.473482	0.280609	1.28811	0.285039	0.0296854	1.68962	-0.312735	1.68962
TTHERM_01296380	UV	L2FC_CPM	1.39595	0.0632855	-0.414898	0.790428	0.265948	0.156151	0.139852	0.0442522	1.39595	-0.414898	1.39595
TTHERM_00000010	MMS	L2FC_CPM	-0.130099	1.71634	0.919514	0.985575	0.766654	0.604727	-0.554236	0.039053	1.71634	-0.554236	1.71634
TTHERM_00000010	HP	L2FC_CPM	-0.260984	0.336819	0.404159	0.322575	-0.653018	-0.508238	0.111414	0.029375	0.404159	-0.653018	-0.653018
TTHERM_00000010	HU	L2FC_CPM	1.20462	-0.577453	0.608906	1.47263	0.060196	1.72302	1.91039	0.0810869	1.91039	-0.577453	1.91039
TTHERM_00000010	IR	L2FC_CPM	2.42114	-1.7077	0.068591	0.833444	-0.127626	0.603789	-1.05187	0.107036	2.42114	-1.7077	2.42114
TTHERM_00000010	CPT	L2FC_CPM	-0.11914	0.197412	-0.176641	0.430501	-0.643972	0.527076	-0.641757	0.0231043	0.527076	-0.643972	-0.643972
TTHERM_00000010	UV	L2FC_CPM	0.945539	-0.644074	-0.701323	0.265023	-0.169307	-0.225681	-0.59516	0.0491592	0.945539	-0.701323	0.945539
TTHERM_00538470	MMS	L2FC_CPM	-0.382377	-0.00226578	0.504291	0.696789	1.10667	1.25569	1.25474	0.0334527	1.25569	-0.382377	1.25569
TTHERM_00538470	HP	L2FC_CPM	0.0580757	0.366946	0.90842	0.776676	0.766641	0.233631	0.773691	0.0202367	0.90842	0.0580757	0.90842
TTHERM_00538470	HU	L2FC_CPM	-0.305777	-0.196693	-0.059747	0.050006	0.416306	0.432658	0.207911	0.0301035	0.432658	-0.305777	0.432658
TTHERM_00538470	IR	L2FC_CPM	0.265229	0.84121	0.634138	0.851821	0.886513	0.563103	0.408736	0.0178416	0.886513	0.265229	0.886513
TTHERM_00538470	CPT	L2FC_CPM	-0.919424	-0.709056	-0.169292	0.171544	0.420401	0.744177	1.40615	0.0393921	1.40615	-0.919424	1.40615
TTHERM_00538470	UV	L2FC_CPM	0.0448628	0.143651	0.49135	0.706656	0.755228	0.322097	0.696465	0.0225349	0.755228	0.0448628	0.755228
TTHERM_01558020	MMS	L2FC_CPM	-0.866021	-1.21739	-1.92371	-1.25793	-0.794993	-0.871995	-1.74893	0.0285229	-0.794993	-1.92371	-1.92371
TTHERM_01558020	HP	L2FC_CPM	-0.392244	-0.578935	-1.31011	-0.533008	-0.715364	0.674285	-1.26511	0.0458714	0.674285	-1.31011	-1.31011
TTHERM_01558020	HU	L2FC_CPM	1.14071	1.17908	1.58961	0.0689545	-0.302607	-0.540506	-0.815286	0.0934721	1.58961	-0.815286	1.58961
TTHERM_01558020	IR	L2FC_CPM	1.72399	0.407155	0.338994	-0.650757	-0.263706	-0.022951	0.367621	0.0550791	1.72399	-0.650757	1.72399
TTHERM_01558020	CPT	L2FC_CPM	0.00491634	0.300426	-0.182019	0.00770047	0.0170627	0.576549	0.945426	0.0179519	0.945426	-0.182019	0.945426
TTHERM_01558020	UV	L2FC_CPM	-0.269848	-0.399825	-0.712595	-0.369963	-0.358524	-0.358257	0.10835	0.0192807	0.10835	-0.712595	-0.712595
TTHERM_00071130	MMS	L2FC_CPM	-0.0264572	0.102346	0.0238099	0.275921	0	-0.0724244	-0.225819	0.0084739	0.275921	-0.225819	0.275921
TTHERM_00071130	HP	L2FC_CPM	0.339788	-0.0104593	0.199035	-0.0626332	0	-0.437852	0.0671605	0.0157256	0.339788	-0.437852	-0.437852
TTHERM_00071130	HU	L2FC_CPM	0.842774	0.0443591	-0.613012	0.302399	0.222349	0.142321	0.214121	0.0395987	0.842774	-0.613012	0.842774
TTHERM_00071130	IR	L2FC_CPM	0.303475	0.114433	-0.751502	-0.344779	0.220167	0.807613	0.13265	0.0390136	0.807613	-0.751502	0.807613
TTHERM_00071130	CPT	L2FC_CPM	-0.0271133	0.548103	1.0827	0.438424	0.901157	-0.461893	-0.614253	0.031187	1.0827	-0.614253	1.0827
TTHERM_00071130	UV	L2FC_CPM	0.158751	0.663882	0.064701	0.542803	0.553001	0.135632	-0.175399	0.0248685	0.663882	-0.175399	0.663882
TTHERM_000698618	MMS	L2FC_CPM	0.377426	-0.206384	0.250946	-0.255231	0.371378	-0.153537	0	0.0153085	0.377426	-0.255231	0.377426
TTHERM_000698618	HP	L2FC_CPM	0.575719	-0.112805	0.250946	0.228814	0.541018	-0.255405	0	0.0212665	0.575719	-0.255405	0.575719
TTHERM_000698618	HU	L2FC_CPM	0.861	0.103157	0.154872	1.17798	0.238196	-1.28887	-0.711552	0.0867135	1.17798	-1.28887	-1.28887
TTHERM_000698618	IR	L2FC_CPM	0.691295	0.0802676	0.574149	1.15205	-0.275086	-0.0568229	-1.26952	0.0624891	1.15205	-1.26952	-1.26952
TTHERM_000698618	CPT	L2FC_CPM	1.03523	-0.14897	-0.334339	-0.0833593	0.418084	-0.214841	0.784173	0.0249345	1.03523	-0.334339	1.03523
TTHERM_000698618	UV	L2FC_CPM	1.02757	0.185627	0.442706	-0.479222	0.483217	-1.00276	0.0420172	0.0551778	1.02757	-1.00276	1.02757
TTHERM_01489720	MMS	L2FC_CPM	0.867973	0.0466771	0.252483	0.244414	0	-0.156865	-0.865416	0.0277256	0.867973	-0.865416	0.867973
TTHERM_01489720	HP	L2FC_CPM	0.680292	0.377411	0.299788	0.00709508	0	-0.156865	-0.167935	0.0206086	0.680292	-0.167935	0.680292
TTHERM_01489720	HU	L2FC_CPM	0.81123	-0.0431965	-1.01822	0.110601	0.344614	-0.396529	0.134035	0.0590249	0.81123	-1.01822	-1.01822
TTHERM_01489720	IR	L2FC_CPM	1.11502	-0.141878	0.0440053	-0.625277	-0.180706	-0.198186	-0.173936	0.0374008	1.11502	-0.625277	1.11502
TTHERM_01489720	CPT	L2FC_CPM	-0.242338	-0.237668	0.816904	-0.622432	-1.12594	-0.849871	0.483631	0.0346433	0.816904	-1.12594	-1.12594
TTHERM_01489720	UV	L2FC_CPM	0	-0.258654	-0.0347873	-0.462818	-0.258777	-0.376047	0.307255	0.0224636	0.307255	-0.462818	-0.462818
TTHERM_01058750	MMS	L2FC_CPM	-0.414812	1.18667	2.07799	1.00545	1.35697	0.220916	1.32847	0.0405854	2.07799	-0.414812	2.07799
TTHERM_01058750	HP	L2FC_CPM	-0.373041	-0.243367	0.585917	-0.576531	-0.161808	-0.240641	-0.727136	0.0272043	0.585917	-0.727136	-0.727136
TTHERM_01058750	HU	L2FC_CPM	-0.295497	-0.512514	-0.566203	-0.316975	-0.0839895	-0.906567	-0.584873	0.0299972	-0.0839895	-0.906567	-0.906567
TTHERM_01058750	IR	L2FC_CPM	1.37298	1.16442	0.476956	-0.815346	-0.320911	-1.78891	-1.04171	0.100723	1.37298	-1.78891	-1.78891
TTHERM_01058750	CPT	L2FC_CPM	0.59099	0.404185	0.578141	-0.198582	-0.72989	-1.24308	-0.849841	0.0368648	0.59099	-1.24308	-1.24308
TTHERM_01058750	UV	L2FC_CPM	0.0942538	1.01512	-0.00861618	-0.900677	-1.48448	-0.253679	0.243611	0.0696313	1.01512	-1.48448	-1.48448
TTHERM_02272860	MMS	L2FC_CPM	0.305813	0.352346	0.274094	-0.172983	0.466866	0.102787	-0.331973	0.0160076	0.466866	-0.331973	0.466866
TTHERM_02272860	HP	L2FC_CPM	0.198528	0.289706	0.274094	0.257562	0.672698	-0.134295	-0.331087	0.0206526	0.672698	-0.331087	0.672698
TTHERM_02272860	HU	L2FC_CPM	-0.63744	-0.0519957	-0.507777	0.269995	0.580089	-0.881393	0.761522	0.0680358	0.761522	-0.881393	-0.881393
TTHERM_02272860	IR	L2FC_CPM	0.0753682	0.52782	-0.616731	-0.613417	0.713048	-0.208717	0.15802	0.0430322	0.713048	-0.616731	0.713048
TTHERM_02272860	CPT	L2FC_CPM	0.640589	-0.119393	0.610228	0.942736	0.731405	-0.0351972	0.792412	0.0180448	0.942736	-0.119393	0.942736
TTHERM_02272860	UV	L2FC_CPM	-0.0523946	0.219574	-0.0107602	0.444253	0.692664	-0.681426	0.141545	0.0350035	0.692664	-0.681426	0.692664
TTHERM_002653344	MMS	L2FC_CPM	0	0	0	0	0	-0.460777	0.103759	0.00758478	0.103759	-0.460777	-0.460777
TTHERM_002653344	HP	L2FC_CPM	-0.0260563	0	0	0	0.285978	-0.470881	0.426483	0.0177346	0.426483	-0.470881	-0.470881
TTHERM_002653344	HU	L2FC_CPM	-0.474808	0	0	-0.214854	0	0	0	0.0155958	0	-0.474808	-0.474808
TTHERM_002653344	IR	L2FC_CPM	0	0	-0.217651	0	0	-0.424257	0	0.0112448	0	-0.424257	-0.424257
TTHERM_002653344	CPT	L2FC_CPM	0	0	0	-0.809743	0.18029	0.253034	0.794231	0.0208253	0.794231	-0.809743	-0.809743
TTHERM_002653344	UV	L2FC_CPM	0	0	-0.490244	0	0	-0.480795	0.00295863	0.0166408	0.00295863	-0.490244	-0.490244
TTHERM_02175710	MMS	L2FC_CPM	0	0.123848	-0.23491	-0.282027	0	0	0	0.00756145	0.123848	-0.282027	-0.282027
[truncated: 304,646+ more rows]

## Sheet: README
Supplemental Table S8. CPM and enrichment values per transcript
